# Supplementary material for: Insect-derived long non-coding RNAs function as epigenetic effectors to reprogram plant immunity
Source: Research Square preprint supplement (doi:10.21203/rs.3.rs-8297537/v1), 2025-12-12
Supplement: Supplementary file 1 [file 0da442ca3dbace47e60b8d6a.xlsx]

## Sheet: Sheet1
	Supplementary data 2. Statistics of analyses of RNA-seq data retrieved from BPH-exposed (feeding sites) and non-exposed (control) rice sheaths. RNA-seq reads derived from 3 biological replicates per treatment were mapped to TN1 rice and BPH merged genome.
	Samples	Cleandata reads	Unique mapped reads	Unique mapped rate	Total mapped reads	Reads mapped to rice	Map rate	Reads mapped to BPH	Map rate	BPH gene number
										PC_number	NC_number	reads>0	reads>4
	BPH_1_FS	26449356	23994333	0.9072	16435814	16432749	0.999814	3065	0.000186	743	208	951	244
	BPH_2_FS	24668387	22394832	0.9078	20024486	20024287	0.99999	199	9.93783e-06	72	21	93	9
	BPH_3_FS	19808256	17740404	0.8956	20335964	20335417	0.999973	547	2.68982e-05	169	67	236	31
	CK_1_FS	22130732	20185873	0.9121	19563894	19563880	0.999999	14	1e-06	5	0	5	2
	CK_2_FS	22543796	20746994	0.9203	15365110	15365091	0.999999	19	1e-06	8	1	9	1
	CK_3_FS	20371908	19100725	0.9376	21520749	21520741	1	8	0	4	0	4	0
