# Supplementary material for: Insect-derived long non-coding RNAs function as epigenetic effectors to reprogram plant immunity
Source: Research Square preprint supplement (doi:10.21203/rs.3.rs-8297537/v1), 2025-12-12
Supplement: Supplementary file 2 [file 590db0d44e8c9b3a7e38841b.xlsx]

## Sheet: Sheet1
Supplementary data 1. List of differentially expressed genes of BPH feeding on resistant rice RHT and susceptible rice TN1.
Gene_id	TN1_baseMean	RHT_baseMean	FC	log2FoldChange	pvalue	padj	gene_type
Nlug000015	203	1194	5.86	2.551	6.04834e-09	1.78017e-07	up
Nlug000031	920	2592	2.816	1.494	3.9159e-06	6.45423e-05	up
Nlug000041	179	17	0.096	-3.386	1.20213e-13	6.89484e-12	down
Nlug000049	290	132	0.454	-1.138	0.000235033	0.00220104	down
Nlug000052	140	50	0.358	-1.483	1.02516e-05	0.00014946	down
Nlug000064	266	0	0.002	-9.137	8.48471e-24	1.38389e-21	down
Nlug000066	5272	15044	2.854	1.513	2.69987e-06	4.63537e-05	up
Nlug000068	2866	6648	2.319	1.214	0.000191221	0.00186667	up
Nlug000070	327	670	2.047	1.033	0.000267887	0.00246305	up
Nlug000074	158	543	3.423	1.775	1.52322e-07	3.52298e-06	up
Nlug000095	102	32	0.307	-1.702	3.25893e-05	0.000410856	down
Nlug000097	223	1106	4.957	2.31	2.05065e-09	6.48668e-08	up
Nlug000101	40	99	2.459	1.298	0.000324647	0.00288007	up
Nlug000107	74	303	4.079	2.028	5.69493e-10	1.9385e-08	up
Nlug000112	77	33	0.422	-1.243	0.00933639	0.0411143	down
Nlug000122	862	384	0.445	-1.167	5.20345e-05	0.000611679	down
Nlug000123	73	23	0.313	-1.676	0.00367589	0.0201884	down
Nlug000126	1438	116	0.081	-3.626	1.22467e-17	1.10844e-15	down
Nlug000129	296	136	0.458	-1.127	0.0118086	0.0490711	down
Nlug000135	1147	3409	2.973	1.572	2.53834e-06	4.39661e-05	up
Nlug000139	824	1797	2.18	1.124	0.00296925	0.0170929	up
Nlug000140	162	523	3.219	1.687	4.6442e-09	1.38512e-07	up
Nlug000156	619	258	0.417	-1.263	0.00101162	0.00729951	down
Nlug000175	137	376	2.742	1.455	2.31976e-06	4.09041e-05	up
Nlug000176	348	763	2.192	1.132	0.000218049	0.00207551	up
Nlug000181	149	544	3.647	1.867	5.67387e-10	1.93554e-08	up
Nlug000185	61	139	2.281	1.19	0.000338297	0.00299438	up
Nlug000202	192	657	3.412	1.77	4.8176e-07	9.86066e-06	up
Nlug000203	143	396	2.765	1.467	0.00247662	0.0148124	up
Nlug000205	598	5	0.009	-6.805	2.23093e-14	1.39727e-12	down
Nlug000210	884	105	0.119	-3.074	1.18379e-14	7.65942e-13	down
Nlug000211	96	208	2.155	1.108	0.00248034	0.014829	up
Nlug000223	408	913	2.239	1.163	0.000287753	0.00260743	up
Nlug000226	1576	2	0.001	-9.724	1.55174e-51	2.42972e-48	down
Nlug000228	570	1146	2.008	1.006	0.000768453	0.00589536	up
Nlug000234	346	698	2.016	1.012	0.000249396	0.00231753	up
Nlug000235	103	234	2.255	1.173	0.000441701	0.00372237	up
Nlug000240	7308	17940	2.455	1.296	0.000508631	0.00418724	up
Nlug000241	13785	27892	2.023	1.017	0.00131118	0.00894526	up
Nlug000256	727	2909	4	2	3.74207e-07	7.92023e-06	up
Nlug000268	1779	478	0.269	-1.895	5.17354e-10	1.77648e-08	down
Nlug000269	75	159	2.116	1.081	0.00139077	0.00937092	up
Nlug000293	602	7	0.011	-6.481	9.88548e-30	2.71556e-27	down
Nlug000294	291	6	0.022	-5.508	2.61732e-27	5.93942e-25	down
Nlug000296	4252	548	0.129	-2.955	0.000733382	0.00569608	down
Nlug000297	4394	23	0.005	-7.574	9.32334e-46	8.11027e-43	down
Nlug000298	99	3	0.033	-4.924	8.55691e-07	1.6748e-05	down
Nlug000300	133	4	0.03	-5.066	1.46443e-11	6.31683e-10	down
Nlug000303	1179	10	0.009	-6.803	5.1729e-39	2.61281e-36	down
Nlug000309	389	844	2.17	1.118	9.41847e-05	0.00101988	up
Nlug000312	3315	1031	0.311	-1.684	0.000546446	0.00445638	down
Nlug000314	580	1488	2.566	1.36	2.54139e-06	4.39702e-05	up
Nlug000328	1730	4785	2.766	1.468	3.53579e-06	5.92757e-05	up
Nlug000331	1004	367	0.366	-1.452	0.00808445	0.0368198	down
Nlug000352	86	180	2.109	1.077	0.000909633	0.00671208	up
Nlug000361	683	247	0.361	-1.47	0.00248275	0.0148321	down
Nlug000383	239	517	2.16	1.111	0.000279418	0.00254961	up
Nlug000410	60	10	0.165	-2.597	0.00572045	0.0283424	down
Nlug000418	1616	4934	3.053	1.61	0.000152598	0.00153264	up
Nlug000421	768	1919	2.497	1.32	3.81519e-05	0.000467802	up
Nlug000422	49	111	2.228	1.156	0.00272716	0.0159633	up
Nlug000451	1294	11163	8.627	3.109	9.26601e-13	4.65023e-11	up
Nlug000452	1840	4397	2.389	1.256	0.00392575	0.0212109	up
Nlug000458	484	218	0.451	-1.148	0.00127943	0.008775	down
Nlug000459	87	278	3.201	1.679	5.88714e-06	9.22731e-05	up
Nlug000480	159	47	0.296	-1.754	0.00432493	0.0227706	down
Nlug000484	334	115	0.343	-1.542	0.00858029	0.0386175	down
Nlug000515	617	1250	2.023	1.017	0.000737859	0.00572234	up
Nlug000525	42	93	2.228	1.156	0.000710934	0.00555202	up
Nlug000532	3285	6624	2.017	1.012	0.00269784	0.0158213	up
Nlug000541	262	7	0.028	-5.144	4.70922e-32	1.50483e-29	down
Nlug000579	17094	35610	2.083	1.059	1.02344e-05	0.000149347	up
Nlug000630	413	835	2.021	1.015	0.000480803	0.00400207	up
Nlug000631	132	469	3.549	1.827	5.94804e-10	2.02027e-08	up
Nlug000651	1104	542	0.491	-1.028	0.000254999	0.00235562	down
Nlug000713	82	225	2.731	1.449	2.49174e-05	0.00032486	up
Nlug000728	432	19	0.045	-4.487	2.8418e-20	3.29607e-18	down
Nlug000730	522	23	0.044	-4.495	1.1953e-10	4.48825e-09	down
Nlug000757	46	117	2.52	1.333	0.000366465	0.00319672	up
Nlug000792	45	125	2.739	1.453	4.45452e-05	0.000534065	up
Nlug000807	124	308	2.486	1.314	5.80013e-05	0.000673227	up
Nlug000811	56	514	9.143	3.193	4.83952e-05	0.000573931	up
Nlug000817	315	108	0.345	-1.537	0.00220532	0.0134992	down
Nlug000823	112	411	3.689	1.883	1.96295e-08	5.31761e-07	up
Nlug000824	93	357	3.843	1.942	1.97782e-09	6.29446e-08	up
Nlug000825	270	587	2.175	1.121	0.000522186	0.00428982	up
Nlug000843	56	5	0.089	-3.495	0.000150806	0.00151951	down
Nlug000845	180	34	0.187	-2.416	0.00419715	0.0222606	down
Nlug000855	8865	4386	0.495	-1.015	0.00152858	0.0100904	down
Nlug000864	717	26	0.036	-4.793	1.2056e-10	4.51611e-09	down
Nlug000865	798	16	0.02	-5.629	1.07498e-14	7.01336e-13	down
Nlug000866	1106	168	0.152	-2.717	8.97111e-08	2.19484e-06	down
Nlug000869	363	1100	3.026	1.598	1.01706e-05	0.000148779	up
Nlug000870	1246	304	0.245	-2.032	5.2965e-06	8.37704e-05	down
Nlug000873	83	168	2.018	1.013	0.00367175	0.0201798	up
Nlug000881	3064	1314	0.429	-1.221	0.000213042	0.00203776	down
Nlug000882	151	339	2.238	1.162	0.000645617	0.00513151	up
Nlug000903	38	109	2.845	1.509	4.35517e-05	0.000522955	up
Nlug000912	143	354	2.484	1.313	0.0055562	0.0277244	up
Nlug000975	3764	8019	2.13	1.091	0.000451284	0.00378479	up
Nlug000977	266	652	2.447	1.291	8.98797e-06	0.000134416	up
Nlug000995	24	71	3.045	1.606	0.000565421	0.00458961	up
Nlug001036	96	42	0.436	-1.196	0.00141222	0.00947412	down
Nlug001039	64	136	2.147	1.102	0.000664094	0.00524641	up
Nlug001053	470	15	0.033	-4.928	1.51169e-08	4.19055e-07	down
Nlug001109	709	1559	2.199	1.137	0.00146611	0.00976037	up
Nlug001112	17	85	5.167	2.369	0.000196393	0.0019041	up
Nlug001121	685	313	0.458	-1.127	0.00726083	0.0340186	down
Nlug001123	584	223	0.381	-1.391	1.09137e-05	0.000156777	down
Nlug001124	48	113	2.362	1.24	0.000453424	0.00380071	up
Nlug001130	22648	83	0.004	-8.099	1.71018e-56	4.46299e-53	down
Nlug001134	275	653	2.37	1.245	7.33071e-06	0.000111932	up
Nlug001135	870	3	0.004	-8.061	8.31989e-23	1.2175e-20	down
Nlug001136	12880	211	0.016	-5.934	2.07199e-25	4.00534e-23	down
Nlug001141	562	1208	2.149	1.104	0.000144811	0.00146951	up
Nlug001164	743	304	0.41	-1.285	0.000762981	0.00585913	down
Nlug001170	269	745	2.772	1.471	1.76088e-06	3.2152e-05	up
Nlug001205	503	1084	2.155	1.108	0.000228889	0.0021564	up
Nlug001225	1067	2480	2.323	1.216	0.000260201	0.00239801	up
Nlug001237	30	80	2.665	1.414	0.000978446	0.00709282	up
Nlug001238	1144	104	0.091	-3.451	1.99081e-13	1.09761e-11	down
Nlug001240	975	5	0.005	-7.609	6.61227e-20	7.39535e-18	down
Nlug001242	163	396	2.427	1.279	0.00114645	0.0080643	up
Nlug001250	300	97	0.322	-1.634	9.50441e-08	2.30729e-06	down
Nlug001268	43	91	2.133	1.093	0.0116198	0.0485051	up
Nlug001269	1079	379	0.351	-1.51	0.00739676	0.034439	down
Nlug001290	1425	495	0.347	-1.525	0.00735934	0.034348	down
Nlug001292	209	755	3.612	1.853	2.24698e-10	8.12547e-09	up
Nlug001326	2535	23	0.009	-6.78	5.81479e-56	1.30069e-52	down
Nlug001354	436	1296	2.975	1.573	1.30387e-07	3.06087e-06	up
Nlug001366	2045	54	0.026	-5.238	1.30737e-07	3.0645e-06	down
Nlug001373	612	58	0.095	-3.395	5.48499e-10	1.8752e-08	down
Nlug001374	948	23	0.024	-5.362	5.7789e-17	4.91772e-15	down
Nlug001382	129	1	0.009	-6.791	1.55394e-11	6.68452e-10	down
Nlug001389	132	398	3.02	1.595	0.000731187	0.00568749	up
Nlug001391	45	133	2.971	1.571	0.00141979	0.00950631	up
Nlug001394	867	346	0.399	-1.325	0.000548724	0.00447263	down
Nlug001400	62	378	6.078	2.603	2.54017e-15	1.79973e-13	up
Nlug001401	207	596	2.872	1.522	2.0287e-06	3.64701e-05	up
Nlug001402	696	179	0.257	-1.959	0.00239386	0.0144332	down
Nlug001410	2086	130	0.062	-4.002	5.20843e-11	2.08577e-09	down
Nlug001424	419	847	2.019	1.014	0.00297825	0.0171006	up
Nlug001430	316	148	0.469	-1.093	0.0111039	0.0468513	down
Nlug001433	213	59	0.277	-1.852	6.24479e-06	9.70049e-05	down
Nlug001441	135	298	2.21	1.144	8.56186e-05	0.000938979	up
Nlug001449	104	467	4.49	2.167	1.45564e-10	5.35033e-09	up
Nlug001450	168	41	0.242	-2.049	0.00379411	0.0206135	down
Nlug001484	46	122	2.634	1.397	6.38945e-05	0.000730796	up
Nlug001486	21	61	2.796	1.483	0.00124129	0.00857728	up
Nlug001491	241	503	2.087	1.062	0.000231785	0.00217714	up
Nlug001503	109	268	2.466	1.302	0.00637233	0.0307767	up
Nlug001504	74	452	6.085	2.605	4.18813e-10	1.46053e-08	up
Nlug001515	3966	1965	0.495	-1.013	0.00613548	0.0299375	down
Nlug001517	2128	839	0.394	-1.344	0.00404953	0.0217	down
Nlug001543	183	498	2.726	1.447	2.13962e-06	3.81573e-05	up
Nlug001546	4406	1144	0.26	-1.945	3.35792e-05	0.000420626	down
Nlug001547	32	99	3.132	1.647	0.0012238	0.00849854	up
Nlug001549	139	363	2.61	1.384	7.77934e-05	0.000866967	up
Nlug001550	44	170	3.849	1.944	6.11822e-09	1.79399e-07	up
Nlug001553	951	1958	2.06	1.043	0.00298704	0.0171309	up
Nlug001580	757	1694	2.238	1.162	0.000129369	0.00133796	up
Nlug001595	132	45	0.337	-1.568	4.00221e-06	6.57109e-05	down
Nlug001596	2890	5829	2.017	1.012	0.00183653	0.0115953	up
Nlug001611	2568	29	0.011	-6.468	1.65004e-30	4.7845e-28	down
Nlug001629	2671	170	0.064	-3.972	1.82143e-11	7.77112e-10	down
Nlug001631	372	175	0.471	-1.086	0.000479407	0.00399285	down
Nlug001633	76	252	3.289	1.718	5.45323e-08	1.37499e-06	up
Nlug001634	399	107	0.268	-1.9	1.76798e-07	4.03542e-06	down
Nlug001641	299	0	0	-11.226	2.15466e-06	3.83818e-05	down
Nlug001642	36	0	0.013	-6.245	0.00406569	0.021742	down
Nlug001643	85	2	0.026	-5.268	0.00344136	0.0191556	down
Nlug001648	446	1062	2.383	1.253	1.58288e-05	0.000217219	up
Nlug001649	144	295	2.045	1.032	0.00242504	0.0145875	up
Nlug001658	294	757	2.577	1.365	3.56556e-05	0.000443796	up
Nlug001664	96	31	0.327	-1.611	0.00360925	0.0199272	down
Nlug001682	2126	5903	2.777	1.473	0.00015736	0.00157541	up
Nlug001685	160	348	2.173	1.12	0.000723873	0.00564181	up
Nlug001707	3238	1618	0.5	-1.001	0.00149113	0.00990578	down
Nlug001713	109	243	2.232	1.159	0.000412313	0.00352017	up
Nlug001725	110	260	2.359	1.238	0.000968655	0.00704141	up
Nlug001735	470	973	2.07	1.049	0.000431519	0.00366416	up
Nlug001739	518	1657	3.196	1.676	1.46951e-07	3.42404e-06	up
Nlug001764	24	88	3.587	1.843	1.02277e-05	0.000149347	up
Nlug001842	13	83	6.253	2.645	1.17572e-07	2.78088e-06	up
Nlug001843	73	215	2.938	1.555	0.000443124	0.00372834	up
Nlug001848	44	116	2.616	1.388	0.000531909	0.00436282	up
Nlug001856	138	558	4.031	2.011	7.96707e-10	2.62628e-08	up
Nlug001866	6926	2437	0.352	-1.507	0.000196958	0.00190722	down
Nlug001894	784	1773	2.263	1.178	0.000373168	0.00324241	up
Nlug001904	639	1283	2.007	1.005	0.00525991	0.0265078	up
Nlug001911	68	138	2.022	1.016	0.00201251	0.0125296	up
Nlug001923	160	421	2.623	1.391	9.12309e-06	0.000136307	up
Nlug001954	5696	13409	2.354	1.235	0.0039886	0.0214691	up
Nlug001961	279	698	2.5	1.322	5.31019e-06	8.39021e-05	up
Nlug001995	875	3628	4.146	2.052	2.17314e-08	5.82653e-07	up
Nlug001999	168	84	0.499	-1.004	0.00164103	0.0106107	down
Nlug002005	78	387	4.969	2.313	1.81163e-10	6.62767e-09	up
Nlug002008	260	80	0.308	-1.698	5.77861e-07	1.1645e-05	down
Nlug002022	119	241	2.017	1.012	0.00119161	0.00831845	up
Nlug002034	2771	114	0.041	-4.603	2.68175e-20	3.13364e-18	down
Nlug002040	88	203	2.296	1.199	0.000914241	0.00673339	up
Nlug002046	151	59	0.389	-1.364	0.00902305	0.0401248	down
Nlug002057	803	367	0.457	-1.129	0.00351092	0.0194518	down
Nlug002058	30456	839	0.028	-5.183	1.05889e-12	5.2803e-11	down
Nlug002065	398	956	2.403	1.265	0.00011753	0.00123592	up
Nlug002077	88	0	0.005	-7.542	1.09415e-15	8.11949e-14	down
Nlug002082	799	189	0.236	-2.082	1.44928e-08	4.03069e-07	down
Nlug002089	671	206	0.307	-1.704	0.000732328	0.00569115	down
Nlug002093	152	329	2.162	1.112	0.000738233	0.0057224	up
Nlug002108	22	85	3.778	1.918	1.43551e-05	0.000198562	up
Nlug002152	112	290	2.585	1.37	4.04598e-05	0.000491864	up
Nlug002153	431	96	0.223	-2.166	7.9489e-08	1.96315e-06	down
Nlug002184	39	181	4.604	2.203	1.41384e-11	6.11546e-10	up
Nlug002194	61	124	2.032	1.023	0.0020322	0.012602	up
Nlug002199	144	395	2.745	1.457	6.02647e-06	9.40802e-05	up
Nlug002223	553	39	0.071	-3.808	7.57624e-17	6.37789e-15	down
Nlug002224	586	176	0.3	-1.738	0.0100481	0.0436431	down
Nlug002228	1633	580	0.355	-1.494	1.30431e-05	0.000182755	down
Nlug002236	221	786	3.554	1.829	2.19549e-07	4.91803e-06	up
Nlug002240	1215	426	0.351	-1.51	0.000205167	0.00197571	down
Nlug002242	1053	2251	2.138	1.096	0.000296306	0.00267208	up
Nlug002243	891	2228	2.501	1.322	1.11565e-05	0.000159678	up
Nlug002251	878	439	0.5	-1	0.00859856	0.0386417	down
Nlug002253	166	73	0.439	-1.189	0.00598536	0.0294205	down
Nlug002259	2437	5020	2.059	1.042	0.010169	0.0439488	up
Nlug002270	241	67	0.278	-1.849	4.17667e-06	6.79817e-05	down
Nlug002281	34	103	2.989	1.58	0.00134913	0.00913658	up
Nlug002282	797	1807	2.266	1.18	0.00442519	0.0231816	up
Nlug002290	2413	1070	0.443	-1.174	0.000813069	0.0061562	down
Nlug002293	318	129	0.406	-1.3	1.6938e-05	0.000230448	down
Nlug002321	8427	28391	3.369	1.752	1.98957e-06	3.58902e-05	up
Nlug002325	418	977	2.337	1.225	4.39389e-05	0.000527199	up
Nlug002328	768	2	0.003	-8.229	7.70309e-13	3.91607e-11	down
Nlug002330	1076	5	0.005	-7.562	7.95964e-11	3.1003e-09	down
Nlug002331	210	103	0.49	-1.029	0.00910136	0.0403708	down
Nlug002333	574	1494	2.602	1.38	5.02605e-06	7.98154e-05	up
Nlug002338	243	0	0.001	-10.926	1.1481e-12	5.67096e-11	down
Nlug002345	57	137	2.386	1.254	0.000379543	0.00329246	up
Nlug002347	281	98	0.347	-1.526	0.00171811	0.0110099	down
Nlug002356	7922	1514	0.191	-2.387	1.21214e-08	3.40749e-07	down
Nlug002357	1369	8	0.006	-7.398	1.21272e-40	6.78171e-38	down
Nlug002363	226	21	0.094	-3.406	2.02422e-11	8.5432e-10	down
Nlug002369	855	2170	2.54	1.345	6.95287e-06	0.000106524	up
Nlug002383	411	1139	2.773	1.471	1.14676e-06	2.18442e-05	up
Nlug002395	164	635	3.872	1.953	1.95168e-08	5.29627e-07	up
Nlug002398	8804	20202	2.295	1.198	0.000496033	0.00410079	up
Nlug002399	48	100	2.081	1.057	0.00121056	0.00843195	up
Nlug002402	688	335	0.487	-1.038	0.000380358	0.0032977	down
Nlug002405	95	221	2.323	1.216	7.65932e-05	0.000855419	up
Nlug002407	1789	6946	3.883	1.957	2.11575e-08	5.6824e-07	up
Nlug002411	245	114	0.467	-1.098	0.00032268	0.00286586	down
Nlug002412	83	2	0.027	-5.225	1.82258e-05	0.000246655	down
Nlug002415	328	135	0.41	-1.287	0.00237173	0.0143274	down
Nlug002430	1334	68	0.051	-4.305	8.7826e-07	1.71469e-05	down
Nlug002432	817	2067	2.531	1.34	8.42108e-05	0.000925964	up
Nlug002437	2412	5393	2.236	1.161	0.000275305	0.00251648	up
Nlug002438	35	76	2.133	1.093	0.0114556	0.0480119	up
Nlug002461	5148	27	0.005	-7.561	2.2734e-53	3.9552e-50	down
Nlug002468	976	7	0.008	-7.038	8.15883e-21	9.90317e-19	down
Nlug002471	517	1	0.002	-8.788	1.2801e-17	1.14536e-15	down
Nlug002474	4474	11067	2.474	1.307	0.000318358	0.00283553	up
Nlug002475	1391	218	0.156	-2.676	3.97787e-05	0.000484335	down
Nlug002477	428	1045	2.44	1.287	6.1167e-06	9.53937e-05	up
Nlug002483	1865	928	0.497	-1.007	0.00233844	0.0141536	down
Nlug002492	4656	19	0.004	-7.946	1.33996e-37	6.35792e-35	down
Nlug002497	189	2	0.012	-6.419	2.19263e-18	2.14576e-16	down
Nlug002498	81	0	0.002	-9.345	5.12894e-15	3.49169e-13	down
Nlug002502	120	293	2.452	1.294	1.30489e-05	0.000182755	up
Nlug002534	263	2170	8.261	3.046	4.00442e-17	3.50286e-15	up
Nlug002537	286	630	2.199	1.137	0.000909582	0.00671208	up
Nlug002539	101	325	3.23	1.692	0.000226552	0.00213953	up
Nlug002564	501	162	0.324	-1.627	0.0011219	0.00792007	down
Nlug002570	1094	3	0.003	-8.392	1.78763e-44	1.39954e-41	down
Nlug002580	290	76	0.262	-1.935	0.00104944	0.00751354	down
Nlug002595	146	69	0.473	-1.079	0.000574213	0.00464893	down
Nlug002617	1375	654	0.475	-1.073	0.000318722	0.00283716	down
Nlug002618	648	256	0.394	-1.343	0.00883816	0.0394492	down
Nlug002620	160	397	2.489	1.316	1.61505e-05	0.000221053	up
Nlug002636	55	204	3.729	1.899	3.64448e-08	9.42006e-07	up
Nlug002641	121	43	0.354	-1.498	0.0015181	0.0100382	down
Nlug002645	331	143	0.432	-1.211	0.000783509	0.00597865	down
Nlug002677	31	141	4.557	2.188	2.49161e-06	4.33485e-05	up
Nlug002681	3102	1395	0.45	-1.153	0.00449823	0.0234856	down
Nlug002682	6443	2314	0.359	-1.477	2.83658e-05	0.000363463	down
Nlug002717	2729	479	0.176	-2.51	1.17656e-09	3.83805e-08	down
Nlug002733	498	1211	2.428	1.28	2.30463e-05	0.000302822	up
Nlug002778	1531	544	0.355	-1.494	0.00180105	0.0113989	down
Nlug002828	30	71	2.402	1.264	0.00265815	0.0156353	up
Nlug002831	355	803	2.259	1.175	2.89663e-05	0.000369947	up
Nlug002842	870	357	0.41	-1.285	0.000220955	0.0020968	down
Nlug002858	158	66	0.42	-1.253	0.00936821	0.0412083	down
Nlug002860	2280	148	0.065	-3.945	2.89977e-14	1.79465e-12	down
Nlug002864	6687	129	0.019	-5.691	1.55199e-19	1.65313e-17	down
Nlug002885	214	79	0.37	-1.434	0.00133525	0.00907044	down
Nlug002890	771	326	0.423	-1.242	0.00377932	0.0205474	down
Nlug002895	37	152	4.074	2.027	1.50118e-07	3.48745e-06	up
Nlug002912	169	357	2.116	1.081	0.00158182	0.0103243	up
Nlug002933	2558	90	0.035	-4.831	3.89763e-18	3.72128e-16	down
Nlug002934	444	117	0.264	-1.924	1.1908e-06	2.26007e-05	down
Nlug002938	242	81	0.335	-1.58	4.98855e-05	0.000589071	down
Nlug002940	390	30	0.079	-3.668	2.49638e-08	6.62513e-07	down
Nlug002970	12	51	4.276	2.096	0.000575309	0.00465299	up
Nlug002974	73	179	2.453	1.294	0.00012823	0.00132793	up
Nlug002992	170	344	2.02	1.015	0.00118751	0.00829347	up
Nlug003002	1782	718	0.403	-1.312	0.00753162	0.0348603	down
Nlug003025	10882	31310	2.877	1.525	1.90767e-07	4.31652e-06	up
Nlug003027	6103	2826	0.463	-1.111	0.000809561	0.0061467	down
Nlug003033	26	63	2.434	1.284	0.0114523	0.0480105	up
Nlug003037	579	191	0.33	-1.599	0.00436607	0.0229314	down
Nlug003039	33	148	4.452	2.154	8.25191e-09	2.3708e-07	up
Nlug003041	4378	12154	2.776	1.473	2.55043e-05	0.000331408	up
Nlug003085	2656	505	0.19	-2.394	6.99657e-12	3.15713e-10	down
Nlug003087	163	35	0.214	-2.223	5.27332e-07	1.07513e-05	down
Nlug003105	114	248	2.17	1.117	0.000601459	0.00482956	up
Nlug003123	367	957	2.608	1.383	2.4556e-06	4.30088e-05	up
Nlug003153	612	252	0.412	-1.278	0.000287271	0.00260457	down
Nlug003154	70	170	2.449	1.292	0.00011153	0.00118235	up
Nlug003155	164	518	3.153	1.657	4.45242e-07	9.18869e-06	up
Nlug003157	27	71	2.66	1.411	0.00329603	0.0185312	up
Nlug003161	55	188	3.424	1.776	5.50261e-07	1.11751e-05	up
Nlug003163	168	515	3.06	1.613	0.00632373	0.0305797	up
Nlug003165	1824	5984	3.282	1.715	1.41727e-06	2.6545e-05	up
Nlug003169	113	247	2.187	1.129	0.000230018	0.00216407	up
Nlug003184	1182	2790	2.36	1.239	0.000340324	0.00300891	up
Nlug003185	79	25	0.319	-1.647	0.00154305	0.0101262	down
Nlug003186	166	358	2.151	1.105	0.000831803	0.00627076	up
Nlug003191	59	2	0.038	-4.737	2.39512e-05	0.000313831	down
Nlug003196	168	355	2.122	1.085	0.000196787	0.00190674	up
Nlug003203	70	29	0.422	-1.244	0.00919741	0.0406702	down
Nlug003206	430	1007	2.34	1.227	0.000187906	0.00184119	up
Nlug003209	333	118	0.354	-1.497	0.00410492	0.0219218	down
Nlug003214	587	24	0.04	-4.626	3.27453e-19	3.39554e-17	down
Nlug003222	524	85	0.163	-2.614	4.1896e-09	1.26887e-07	down
Nlug003238	84	196	2.323	1.216	0.000112983	0.00119371	up
Nlug003260	16	90	5.457	2.448	4.31704e-07	8.98887e-06	up
Nlug003281	21	57	2.738	1.453	0.0091933	0.0406702	up
Nlug003297	1644	187	0.114	-3.133	6.88161e-19	6.9969e-17	down
Nlug003315	74	162	2.164	1.113	0.00216725	0.013313	up
Nlug003350	410	195	0.476	-1.072	0.00077273	0.00591947	down
Nlug003354	418	25	0.061	-4.034	2.89703e-23	4.53616e-21	down
Nlug003368	39	2	0.047	-4.407	0.000161415	0.00160983	down
Nlug003370	240	32	0.135	-2.893	0.000143428	0.00145831	down
Nlug003371	106	16	0.149	-2.743	0.00375967	0.0204833	down
Nlug003408	278	98	0.355	-1.496	6.85796e-05	0.000778694	down
Nlug003409	113	50	0.445	-1.168	0.00625117	0.0303131	down
Nlug003420	846	11	0.013	-6.28	1.30248e-09	4.21369e-08	down
Nlug003421	291	638	2.189	1.131	0.00153475	0.0101077	up
Nlug003422	125	307	2.459	1.298	0.000460701	0.00385548	up
Nlug003431	555	102	0.183	-2.447	8.74909e-08	2.14387e-06	down
Nlug003433	708	4	0.007	-7.251	5.29125e-41	3.06853e-38	down
Nlug003438	24709	91429	3.7	1.888	8.32903e-09	2.38857e-07	up
Nlug003447	1660	822	0.495	-1.014	0.00533733	0.0267945	down
Nlug003465	2655	971	0.366	-1.451	2.2964e-06	4.05378e-05	down
Nlug003477	180	78	0.436	-1.198	0.00178201	0.0113196	down
Nlug003478	1118	4132	3.697	1.886	1.04285e-06	2.00602e-05	up
Nlug003492	520	23	0.044	-4.495	1.22149e-21	1.62085e-19	down
Nlug003493	505	44	0.088	-3.513	3.13801e-14	1.93445e-12	down
Nlug003507	15689	96	0.006	-7.348	2.39698e-38	1.17287e-35	down
Nlug003526	411	59	0.143	-2.81	1.59637e-06	2.94813e-05	down
Nlug003527	546	1420	2.603	1.38	2.69428e-06	4.63085e-05	up
Nlug003528	207	581	2.806	1.488	1.60943e-06	2.96824e-05	up
Nlug003620	113	3	0.026	-5.276	7.17088e-12	3.22648e-10	down
Nlug003621	1591	77	0.049	-4.354	2.87762e-09	8.9401e-08	down
Nlug003623	311	3285	10.58	3.403	0.000112218	0.00118723	up
Nlug003627	28	67	2.399	1.263	0.00735648	0.034348	up
Nlug003633	6	39	6.177	2.627	0.00422496	0.0223561	up
Nlug003634	615	163	0.266	-1.912	1.70105e-08	4.67281e-07	down
Nlug003648	98	47	0.479	-1.063	0.00173803	0.0110897	down
Nlug003649	181	422	2.328	1.219	0.00065768	0.00520625	up
Nlug003672	968	429	0.444	-1.172	0.000132619	0.00136705	down
Nlug003684	238	608	2.557	1.354	1.65284e-05	0.000225634	up
Nlug003697	1129	322	0.286	-1.807	6.59631e-06	0.000101759	down
Nlug003708	388	860	2.214	1.147	7.61338e-05	0.000851502	up
Nlug003710	39	118	3.039	1.604	0.000116696	0.00122798	up
Nlug003711	30	119	3.922	1.972	2.49164e-08	6.62378e-07	up
Nlug003734	2241	4666	2.082	1.058	0.00126895	0.0087184	up
Nlug003748	2710	5637	2.08	1.057	0.00165804	0.0107014	up
Nlug003751	67	258	3.874	1.954	4.59224e-09	1.37486e-07	up
Nlug003754	354	27	0.075	-3.736	7.36092e-11	2.9032e-09	down
Nlug003756	83	241	2.886	1.529	2.68757e-06	4.6244e-05	up
Nlug003757	70	197	2.814	1.493	6.95085e-06	0.000106524	up
Nlug003758	72	181	2.497	1.32	3.72211e-05	0.000458452	up
Nlug003812	135	317	2.355	1.236	0.00130126	0.00888578	up
Nlug003821	37073	6956	0.188	-2.414	0.000565288	0.00458961	down
Nlug003822	685	1551	2.264	1.179	0.000227835	0.00214906	up
Nlug003838	56	199	3.554	1.829	1.62213e-07	3.71888e-06	up
Nlug003845	1069	2665	2.493	1.318	2.03716e-05	0.000272398	up
Nlug003860	372	140	0.375	-1.415	6.64263e-06	0.00010231	down
Nlug003867	85	283	3.327	1.734	2.70329e-06	4.63615e-05	up
Nlug003872	246	651	2.642	1.401	1.59821e-05	0.00021894	up
Nlug003873	491	1012	2.061	1.043	0.000566746	0.00459561	up
Nlug003921	147	831	5.653	2.499	1.1031e-15	8.14734e-14	up
Nlug003923	114	302	2.652	1.407	1.5287e-05	0.000210152	up
Nlug003927	815	4705	5.776	2.53	3.01731e-11	1.25319e-09	up
Nlug003961	1933	3	0.002	-9.378	1.7151e-37	7.89852e-35	down
Nlug003962	851	1	0.001	-10.018	6.04414e-22	8.22949e-20	down
Nlug003993	1032	350	0.34	-1.557	0.000503563	0.00415207	down
Nlug003995	151	52	0.342	-1.546	0.00134074	0.00909982	down
Nlug004004	183	74	0.404	-1.307	0.00404588	0.0216879	down
Nlug004060	472	190	0.403	-1.312	0.0118973	0.0493181	down
Nlug004118	132	63	0.479	-1.062	0.00464086	0.0240759	down
Nlug004119	1087	526	0.484	-1.047	0.00234851	0.0142035	down
Nlug004121	467	1161	2.488	1.315	8.75979e-05	0.000958496	up
Nlug004136	34	188	5.44	2.444	1.1173e-09	3.65233e-08	up
Nlug004181	196	636	3.245	1.698	7.08222e-09	2.05358e-07	up
Nlug004188	41	95	2.345	1.23	0.000935119	0.0068485	up
Nlug004234	1012	2820	2.787	1.479	4.96615e-06	7.89441e-05	up
Nlug004251	2217	949	0.428	-1.224	0.0040267	0.0216147	down
Nlug004261	71	14	0.196	-2.349	0.00567616	0.0281882	down
Nlug004263	1782	5133	2.879	1.526	2.61997e-05	0.000338866	up
Nlug004266	262	130	0.495	-1.014	0.0109595	0.0464171	down
Nlug004273	359	1041	2.895	1.533	6.26321e-07	1.25408e-05	up
Nlug004281	782	22	0.028	-5.173	1.29645e-34	4.95118e-32	down
Nlug004333	17	72	4.159	2.056	2.57885e-05	0.000334823	up
Nlug004342	672	1454	2.163	1.113	0.000188372	0.00184346	up
Nlug004343	93	209	2.243	1.166	0.000160951	0.00160623	up
Nlug004351	239	497	2.082	1.058	0.00035933	0.0031442	up
Nlug004359	73	147	2.015	1.011	0.00232226	0.014072	up
Nlug004360	377	796	2.113	1.079	0.000224033	0.00211958	up
Nlug004391	156	47	0.298	-1.746	0.00247442	0.0148049	down
Nlug004393	284	21	0.077	-3.708	4.90954e-12	2.22822e-10	down
Nlug004409	879	122	0.139	-2.847	1.51253e-14	9.64123e-13	down
Nlug004420	16	89	5.431	2.441	1.7832e-08	4.85589e-07	up
Nlug004423	27	68	2.47	1.305	0.00638239	0.0308001	up
Nlug004425	9129	20370	2.231	1.158	4.52632e-05	0.000539987	up
Nlug004428	64	181	2.804	1.487	5.10078e-06	8.09199e-05	up
Nlug004437	31	81	2.562	1.357	0.000351782	0.00309623	up
Nlug004448	394	156	0.396	-1.335	0.000869358	0.00650504	down
Nlug004450	5136	1676	0.326	-1.615	1.94528e-06	3.51318e-05	down
Nlug004453	70	159	2.275	1.186	0.000192149	0.0018739	up
Nlug004481	11903	29199	2.453	1.295	0.00129541	0.00885743	up
Nlug004482	3376	12689	3.758	1.91	0.00153026	0.010093	up
Nlug004484	291	1134	3.89	1.96	0.00472744	0.0244379	up
Nlug004486	2067	4847	2.344	1.229	0.00308493	0.017565	up
Nlug004496	568	1147	2.019	1.013	0.00355635	0.019656	up
Nlug004507	1339	2906	2.17	1.118	0.00255345	0.0151504	up
Nlug004534	294	85	0.29	-1.788	0.00379647	0.0206192	down
Nlug004538	86	175	2.044	1.031	0.000973157	0.00706103	up
Nlug004543	387	148	0.382	-1.387	0.00532676	0.0267757	down
Nlug004544	156	885	5.684	2.507	1.5381e-15	1.1254e-13	up
Nlug004545	27	62	2.26	1.177	0.010308	0.0443171	up
Nlug004548	595	223	0.375	-1.415	0.00847617	0.0382258	down
Nlug004550	114	230	2.024	1.017	0.000578548	0.00467113	up
Nlug004555	208	52	0.248	-2.014	1.78591e-06	3.25539e-05	down
Nlug004559	97	204	2.089	1.063	0.00281785	0.0163717	up
Nlug004564	1336	313	0.234	-2.094	0.000544712	0.00444456	down
Nlug004566	1724	18198	10.552	3.399	5.92647e-15	3.96567e-13	up
Nlug004567	690	325	0.471	-1.086	0.00122389	0.00849854	down
Nlug004580	177	362	2.043	1.031	0.000334533	0.00296273	up
Nlug004586	393	1341	3.416	1.772	5.05636e-10	1.74389e-08	up
Nlug004588	1654	3933	2.378	1.249	6.87479e-05	0.000779475	up
Nlug004589	596	1233	2.069	1.049	0.000526033	0.00431689	up
Nlug004591	138	289	2.087	1.062	0.00278377	0.0162159	up
Nlug004624	12	98	8.267	3.047	6.8316e-11	2.70808e-09	up
Nlug004636	1371	681	0.497	-1.009	0.000578029	0.00467113	down
Nlug004678	403	172	0.425	-1.234	0.000386279	0.00334533	down
Nlug004680	1818	31	0.017	-5.906	3.82725e-23	5.81817e-21	down
Nlug004697	350	770	2.2	1.138	0.000278825	0.00254716	up
Nlug004699	909	1	0.002	-9.228	1.73147e-41	1.08445e-38	down
Nlug004701	598	0	0.001	-10.304	2.22667e-24	3.83135e-22	down
Nlug004702	268	0	0.002	-9.143	1.7236e-15	1.24945e-13	down
Nlug004703	182	0	0.001	-10.51	2.56414e-24	4.36406e-22	down
Nlug004704	628	0	0.001	-10.375	4.15572e-28	1.00108e-25	down
Nlug004705	88	200	2.279	1.188	0.00474297	0.0244858	up
Nlug004720	300	674	2.244	1.166	7.18935e-05	0.000810446	up
Nlug004721	218	0	0.002	-8.853	1.24393e-22	1.80347e-20	down
Nlug004722	308	26	0.085	-3.552	2.33614e-07	5.19502e-06	down
Nlug004723	459	1	0.003	-8.615	3.66492e-32	1.22097e-29	down
Nlug004724	162	326	2.014	1.01	0.00149071	0.00990578	up
Nlug004725	91	26	0.279	-1.841	0.000776238	0.00594053	down
Nlug004729	686	325	0.474	-1.076	0.000710286	0.00554973	down
Nlug004730	84	16	0.196	-2.353	0.00484095	0.0248686	down
Nlug004731	1123	426	0.379	-1.4	3.59085e-06	5.98782e-05	down
Nlug004758	617	1512	2.452	1.294	0.00010558	0.00112767	up
Nlug004777	241	1022	4.236	2.083	1.6732e-12	8.08611e-11	up
Nlug004797	31	79	2.556	1.354	0.00331273	0.0186117	up
Nlug004828	222	15	0.068	-3.877	1.88913e-16	1.53264e-14	down
Nlug004834	133	36	0.272	-1.878	0.00044263	0.00372619	down
Nlug004837	157	57	0.368	-1.444	1.86784e-05	0.000251692	down
Nlug004839	599	1462	2.437	1.285	1.38379e-05	0.000192428	up
Nlug004845	1604	4011	2.5	1.322	4.29253e-05	0.000517018	up
Nlug004864	635	1808	2.845	1.508	1.59365e-05	0.000218506	up
Nlug004866	146	72	0.492	-1.023	0.00235181	0.014218	down
Nlug004873	1543	261	0.169	-2.565	6.19082e-07	1.24277e-05	down
Nlug004880	29	79	2.727	1.447	0.000489978	0.00406575	up
Nlug004889	52	240	4.643	2.215	3.98718e-08	1.02346e-06	up
Nlug004907	414	191	0.462	-1.115	0.00183182	0.0115702	down
Nlug004943	8184	16943	2.07	1.05	0.000357477	0.00313403	up
Nlug004961	675	1489	2.206	1.141	0.000508365	0.00418724	up
Nlug004968	210	11	0.053	-4.226	1.98182e-19	2.08264e-17	down
Nlug004974	308	26	0.086	-3.533	8.89578e-06	0.000133292	down
Nlug004994	493	1094	2.22	1.15	0.00576093	0.0284827	up
Nlug004995	246	522	2.114	1.08	0.000729431	0.00567665	up
Nlug004996	27	68	2.557	1.354	0.00586713	0.0289165	up
Nlug005010	28	92	3.311	1.727	0.000303183	0.00271892	up
Nlug005020	764	312	0.408	-1.292	0.00265945	0.0156372	down
Nlug005036	346	124	0.359	-1.477	0.00107845	0.00766028	down
Nlug005039	46	211	4.52	2.176	9.37366e-11	3.60621e-09	up
Nlug005041	86	193	2.253	1.172	0.000915541	0.00673979	up
Nlug005051	45	93	2.05	1.036	0.007082	0.0333704	up
Nlug005056	3622	7571	2.09	1.064	0.000791388	0.00602409	up
Nlug005063	1453	20147	13.865	3.793	6.84645e-20	7.60296e-18	up
Nlug005068	144	353	2.451	1.294	1.2042e-05	0.000170329	up
Nlug005077	160	60	0.375	-1.415	0.00273459	0.0159889	down
Nlug005080	325	109	0.336	-1.573	3.18126e-06	5.37349e-05	down
Nlug005100	21	85	3.989	1.996	4.93818e-05	0.000583562	up
Nlug005148	2407	4886	2.03	1.021	0.00293781	0.0169305	up
Nlug005158	3249	7495	2.306	1.206	0.000740134	0.00572863	up
Nlug005159	52	156	2.992	1.581	1.28148e-06	2.41752e-05	up
Nlug005160	221	482	2.187	1.129	6.86507e-05	0.000778937	up
Nlug005161	417	173	0.415	-1.27	0.00312108	0.0177065	down
Nlug005188	385	134	0.347	-1.525	9.53523e-06	0.000141385	down
Nlug005199	2969	1435	0.484	-1.048	0.00120812	0.00842239	down
Nlug005202	3435	1347	0.392	-1.35	0.000581985	0.00469486	down
Nlug005203	53	188	3.523	1.817	1.76181e-06	3.2152e-05	up
Nlug005221	121	33	0.273	-1.873	6.14312e-06	9.56153e-05	down
Nlug005223	488	45	0.094	-3.417	7.56292e-10	2.5036e-08	down
Nlug005251	87	184	2.101	1.071	0.00102615	0.00739415	up
Nlug005279	127	409	3.209	1.682	1.01051e-08	2.88733e-07	up
Nlug005300	15	76	4.925	2.3	2.68278e-06	4.62123e-05	up
Nlug005324	1728	3658	2.117	1.082	0.000847027	0.0063702	up
Nlug005327	90	429	4.772	2.255	2.91953e-09	9.03438e-08	up
Nlug005333	141	312	2.212	1.146	0.000148923	0.00150196	up
Nlug005346	92	211	2.298	1.2	0.000972729	0.00706103	up
Nlug005352	172	359	2.091	1.064	0.000177539	0.00175278	up
Nlug005362	27	70	2.603	1.38	0.00111832	0.00790191	up
Nlug005369	280	662	2.357	1.237	3.19897e-05	0.000404928	up
Nlug005408	219	25	0.115	-3.119	6.62296e-10	2.20643e-08	down
Nlug005409	5041	12300	2.44	1.287	0.000195088	0.00189497	up
Nlug005410	141	26	0.186	-2.43	0.000115619	0.00121746	down
Nlug005411	77	9	0.114	-3.138	1.07428e-05	0.000154943	down
Nlug005413	784	92	0.118	-3.088	4.80655e-09	1.43082e-07	down
Nlug005414	211	1823	8.615	3.107	1.18075e-15	8.67989e-14	up
Nlug005419	272	600	2.206	1.142	0.00122382	0.00849854	up
Nlug005446	26	64	2.511	1.328	0.00187778	0.0118129	up
Nlug005459	44	168	3.844	1.942	3.99344e-06	6.57109e-05	up
Nlug005463	840	41	0.049	-4.353	1.74849e-26	3.65038e-24	down
Nlug005469	46	100	2.149	1.103	0.00274029	0.0160043	up
Nlug005479	55	159	2.863	1.518	0.00160047	0.0104287	up
Nlug005480	649	1	0.002	-8.743	1.2385e-31	3.87848e-29	down
Nlug005495	113	281	2.482	1.312	5.85605e-05	0.000676709	up
Nlug005497	1740	3506	2.015	1.01	0.00131225	0.00894526	up
Nlug005514	31	69	2.188	1.13	0.00608577	0.0297784	up
Nlug005517	12011	29530	2.459	1.298	1.13035e-06	2.16105e-05	up
Nlug005527	1299	630	0.485	-1.044	0.00533018	0.0267843	down
Nlug005529	858	410	0.478	-1.064	0.00576816	0.0285004	down
Nlug005548	85	253	2.975	1.573	1.25308e-06	2.36965e-05	up
Nlug005553	2208	7828	3.545	1.826	3.03805e-06	5.15382e-05	up
Nlug005555	2988	6459	2.161	1.112	0.00124866	0.00860923	up
Nlug005585	91	282	3.1	1.632	0.000137185	0.00140326	up
Nlug005604	20	101	5.054	2.338	2.05578e-07	4.62491e-06	up
Nlug005617	93	38	0.413	-1.275	0.0106225	0.0453499	down
Nlug005634	1988	384	0.193	-2.373	0.000666048	0.0052592	down
Nlug005635	3038	634	0.209	-2.261	5.01893e-05	0.000591765	down
Nlug005648	105	1	0.008	-6.999	2.37762e-14	1.48322e-12	down
Nlug005657	80	23	0.294	-1.765	0.00682956	0.0325136	down
Nlug005664	590	7	0.013	-6.308	1.05607e-11	4.658e-10	down
Nlug005665	200	46	0.23	-2.122	2.12232e-10	7.69244e-09	down
Nlug005685	237	646	2.722	1.445	3.56404e-06	5.95974e-05	up
Nlug005690	142	330	2.314	1.21	0.00154983	0.0101452	up
Nlug005692	58	194	3.342	1.741	4.90313e-07	1.00226e-05	up
Nlug005693	10	42	4.139	2.049	0.00757264	0.0349977	up
Nlug005696	159	398	2.5	1.322	8.66703e-06	0.000130113	up
Nlug005703	1198	425	0.355	-1.495	0.00711684	0.0334921	down
Nlug005704	74	3	0.044	-4.509	2.3053e-05	0.000302822	down
Nlug005709	175	375	2.142	1.099	0.00066331	0.00524286	up
Nlug005710	149	328	2.204	1.14	0.00031735	0.00282815	up
Nlug005719	57	8	0.148	-2.756	0.00090568	0.00670308	down
Nlug005721	35	150	4.222	2.078	1.19761e-09	3.89858e-08	up
Nlug005733	596	128	0.215	-2.216	1.72995e-09	5.51682e-08	down
Nlug005736	50	113	2.28	1.189	0.000684174	0.00537522	up
Nlug005816	80	331	4.114	2.041	2.56124e-09	8.0347e-08	up
Nlug005823	242	1	0.005	-7.696	1.48991e-24	2.62124e-22	down
Nlug005829	297	595	2.004	1.003	0.00386467	0.020917	up
Nlug005830	82	279	3.375	1.755	2.02169e-08	5.44847e-07	up
Nlug005843	87	41	0.474	-1.077	0.00705636	0.0332881	down
Nlug005850	11827	1095	0.093	-3.433	3.50053e-09	1.07263e-07	down
Nlug005869	12005	32776	2.73	1.449	8.54568e-06	0.000128538	up
Nlug005870	12690	25659	2.022	1.016	0.0024499	0.0147032	up
Nlug005882	769	350	0.456	-1.134	0.000162815	0.0016207	down
Nlug005898	101	24	0.241	-2.051	3.69737e-05	0.000457655	down
Nlug005899	12	78	6.296	2.654	5.09377e-08	1.29478e-06	up
Nlug005905	165	339	2.053	1.038	0.000391045	0.00337239	up
Nlug005917	26	85	3.248	1.699	5.30812e-05	0.000621649	up
Nlug005928	372	761	2.045	1.032	0.000147971	0.00149383	up
Nlug005973	270	635	2.354	1.235	2.51758e-05	0.000327956	up
Nlug005992	1010	187	0.185	-2.432	3.40694e-16	2.70791e-14	down
Nlug006001	1110	2478	2.232	1.159	0.00347756	0.0193228	up
Nlug006002	15796	39983	2.531	1.34	9.95265e-08	2.40121e-06	up
Nlug006006	481	1704	3.541	1.824	2.28929e-07	5.10622e-06	up
Nlug006007	37	126	3.376	1.756	2.2013e-06	3.9035e-05	up
Nlug006011	2256	10669	4.729	2.242	4.70222e-06	7.53606e-05	up
Nlug006017	265	94	0.354	-1.5	0.00748888	0.0347528	down
Nlug006018	264	1283	4.855	2.279	3.95313e-08	1.01806e-06	up
Nlug006019	163	41	0.252	-1.987	0.000115348	0.00121624	down
Nlug006045	1199	2586	2.157	1.109	0.000282119	0.00256678	up
Nlug006144	76	273	3.59	1.844	0.0104235	0.0447523	up
Nlug006147	205	481	2.345	1.23	0.000212389	0.002034	up
Nlug006148	77	280	3.63	1.86	4.22875e-06	6.87578e-05	up
Nlug006190	2149	166	0.077	-3.696	4.02823e-22	5.53281e-20	down
Nlug006200	24	63	2.614	1.386	0.00797755	0.0364417	up
Nlug006202	6705	1768	0.264	-1.923	2.03752e-07	4.59704e-06	down
Nlug006206	9730	83	0.008	-6.882	7.16445e-13	3.66604e-11	down
Nlug006216	77	29	0.377	-1.408	0.0114118	0.0478665	down
Nlug006234	148	39	0.267	-1.907	0.000115546	0.00121746	down
Nlug006235	5611	2791	0.497	-1.008	0.00545286	0.0272869	down
Nlug006241	1309	4712	3.601	1.848	2.51912e-06	4.37299e-05	up
Nlug006246	63	155	2.471	1.305	3.97415e-05	0.000484335	up
Nlug006254	358	136	0.38	-1.396	0.000783102	0.00597865	down
Nlug006270	201	482	2.397	1.261	1.09624e-05	0.000157332	up
Nlug006272	2570	12	0.005	-7.748	9.97041e-11	3.77093e-09	down
Nlug006280	6795	1638	0.241	-2.053	3.25224e-08	8.45908e-07	down
Nlug006283	1663	485	0.292	-1.776	3.89254e-07	8.20315e-06	down
Nlug006284	5710	136	0.024	-5.392	1.69601e-33	6.03549e-31	down
Nlug006289	41	121	2.901	1.536	0.000268298	0.00246394	up
Nlug006311	118	42	0.358	-1.481	0.000354454	0.00311329	down
Nlug006316	4072	130	0.032	-4.964	4.30263e-20	4.88193e-18	down
Nlug006318	612	185	0.302	-1.728	2.79187e-05	0.000359499	down
Nlug006323	69	30	0.428	-1.224	0.0109297	0.0463408	down
Nlug006324	1571	701	0.446	-1.165	0.000930791	0.00682187	down
Nlug006329	5337	12905	2.418	1.274	3.28253e-05	0.000413165	up
Nlug006350	683	25	0.037	-4.767	1.04734e-06	2.01218e-05	down
Nlug006356	107	33	0.307	-1.705	0.00201953	0.0125503	down
Nlug006358	62	2	0.035	-4.817	8.85249e-06	0.00013277	down
Nlug006360	8736	3727	0.427	-1.229	0.000558322	0.00454376	down
Nlug006366	721	3	0.004	-7.955	7.54422e-12	3.38387e-10	down
Nlug006367	293	64	0.218	-2.195	2.47573e-07	5.46757e-06	down
Nlug006373	189	421	2.227	1.155	0.000145186	0.00147236	up
Nlug006407	22	72	3.245	1.698	0.000187301	0.00183641	up
Nlug006409	7294	3426	0.47	-1.09	0.000563369	0.0045777	down
Nlug006419	144	45	0.309	-1.694	3.70101e-05	0.000457744	down
Nlug006433	1005	245	0.244	-2.035	2.48876e-06	4.33471e-05	down
Nlug006439	2159	548	0.254	-1.979	0.000543768	0.00443917	down
Nlug006450	100	8	0.085	-3.556	1.79304e-06	3.26459e-05	down
Nlug006451	71	0	0.007	-7.236	1.059e-08	3.0094e-07	down
Nlug006456	6	120	18.102	4.178	6.14834e-13	3.17725e-11	up
Nlug006457	11	111	10.054	3.33	3.09995e-13	1.65662e-11	up
Nlug006458	935	2511	2.686	1.425	1.77617e-05	0.000241208	up
Nlug006503	178	399	2.243	1.165	0.000880536	0.00657415	up
Nlug006507	2895	731	0.253	-1.985	2.07434e-06	3.71626e-05	down
Nlug006516	487	983	2.018	1.013	0.000364366	0.00318033	up
Nlug006517	61	441	7.185	2.845	2.73857e-15	1.93155e-13	up
Nlug006520	2793	6286	2.251	1.17	0.000456567	0.00382296	up
Nlug006522	22	58	2.607	1.382	0.00230165	0.0139687	up
Nlug006523	177	34	0.192	-2.381	1.61443e-07	3.712e-06	down
Nlug006528	87	206	2.346	1.23	0.000152268	0.0015303	up
Nlug006543	437	192	0.44	-1.186	0.00418557	0.0222224	down
Nlug006562	3829	1749	0.457	-1.13	0.000874904	0.00653902	down
Nlug006563	599	1240	2.069	1.049	0.000215561	0.00205809	up
Nlug006592	172	23	0.134	-2.901	2.60726e-13	1.41261e-11	down
Nlug006594	2906	282	0.097	-3.363	8.06274e-14	4.72833e-12	down
Nlug006595	14	104	7.317	2.871	9.29493e-06	0.000138346	up
Nlug006596	36	127	3.51	1.812	8.20003e-08	2.01564e-06	up
Nlug006609	93	347	3.725	1.897	0.00644988	0.0310554	up
Nlug006613	842	381	0.452	-1.145	0.000988541	0.00715607	down
Nlug006617	216	1064	4.925	2.3	9.58477e-11	3.6694e-09	up
Nlug006618	1932	5901	3.055	1.611	3.00504e-06	5.1089e-05	up
Nlug006622	343	958	2.79	1.48	0.00123651	0.00855874	up
Nlug006624	1943	830	0.427	-1.227	0.00417987	0.0222224	down
Nlug006625	173	21	0.123	-3.022	1.15902e-05	0.000164384	down
Nlug006636	1300	7826	6.017	2.589	9.87744e-08	2.38674e-06	up
Nlug006644	52	221	4.264	2.092	7.87317e-08	1.94752e-06	up
Nlug006691	177	371	2.097	1.068	0.000449708	0.00377764	up
Nlug006715	1791	4605	2.571	1.362	5.84729e-05	0.000676196	up
Nlug006725	87	37	0.424	-1.238	0.00713599	0.0335287	down
Nlug006732	79	401	5.039	2.333	1.55831e-13	8.71427e-12	up
Nlug006735	261	687	2.628	1.394	4.48912e-06	7.21669e-05	up
Nlug006741	5186	48	0.009	-6.742	6.51247e-23	9.62002e-21	down
Nlug006756	197	461	2.336	1.224	5.26348e-05	0.000617345	up
Nlug006762	125	59	0.473	-1.079	0.0112807	0.0474438	down
Nlug006763	1255	3324	2.648	1.405	1.06359e-05	0.000154176	up
Nlug006771	5107	331	0.065	-3.948	7.125e-13	3.65781e-11	down
Nlug006776	461	1149	2.495	1.319	3.76747e-06	6.25568e-05	up
Nlug006777	1628	784	0.481	-1.055	0.00297942	0.0171011	down
Nlug006781	14	62	4.328	2.114	0.000226836	0.00214092	up
Nlug006809	47	117	2.451	1.293	0.000686092	0.00538757	up
Nlug006810	44	200	4.527	2.179	2.46447e-10	8.87098e-09	up
Nlug006823	3514	7119	2.026	1.019	0.00131983	0.00898515	up
Nlug006833	19	75	3.943	1.979	1.3062e-05	0.000182775	up
Nlug006869	218	48	0.222	-2.17	8.16396e-07	1.60592e-05	down
Nlug006880	38	150	3.896	1.962	3.49688e-07	7.4903e-06	up
Nlug006890	20241	56936	2.813	1.492	7.84245e-11	3.06227e-09	up
Nlug006901	59	154	2.59	1.373	0.000122178	0.00127453	up
Nlug006923	197	55	0.278	-1.849	4.29219e-06	6.96446e-05	down
Nlug006932	159	343	2.156	1.108	0.000270808	0.00248407	up
Nlug006944	1745	5034	2.884	1.528	0.0011123	0.00786296	up
Nlug006951	225	517	2.295	1.199	4.5488e-05	0.000542048	up
Nlug006968	175	1342	7.675	2.94	8.17314e-11	3.17556e-09	up
Nlug006979	30	129	4.188	2.066	8.22246e-08	2.01798e-06	up
Nlug006987	278	594	2.135	1.094	0.000371388	0.00323425	up
Nlug007002	112	14	0.128	-2.965	6.10314e-10	2.05955e-08	down
Nlug007004	345	819	2.376	1.249	4.24294e-05	0.00051144	up
Nlug007014	196	616	3.149	1.655	3.74312e-07	7.92023e-06	up
Nlug007016	2895	24352	8.412	3.072	2.64462e-17	2.32638e-15	up
Nlug007030	17	90	5.456	2.448	2.43947e-08	6.50718e-07	up
Nlug007045	109	346	3.167	1.663	0.00122392	0.00849854	up
Nlug007052	317	130	0.411	-1.281	0.000284919	0.00258774	down
Nlug007067	20	80	4.165	2.058	4.47724e-05	0.000535559	up
Nlug007094	175	86	0.493	-1.019	0.000984812	0.00713319	down
Nlug007105	1209	318	0.263	-1.927	6.15627e-10	2.07301e-08	down
Nlug007117	160	2	0.016	-5.96	6.73219e-19	6.88972e-17	down
Nlug007118	416	15	0.037	-4.754	8.75359e-17	7.25205e-15	down
Nlug007119	606	6	0.011	-6.569	1.67534e-15	1.22012e-13	down
Nlug007123	1597	333	0.209	-2.26	3.44657e-09	1.05817e-07	down
Nlug007137	212	61	0.286	-1.807	2.97735e-06	5.06732e-05	down
Nlug007145	293	793	2.71	1.438	0.00135017	0.00913658	up
Nlug007150	1305	359	0.275	-1.861	3.22725e-05	0.000407841	down
Nlug007154	120	371	3.094	1.629	0.000195812	0.00190083	up
Nlug007163	25	71	2.901	1.537	0.0096819	0.0423706	up
Nlug007172	34	73	2.133	1.093	0.0114685	0.0480401	up
Nlug007194	18535	6934	0.374	-1.418	0.0111639	0.0470538	down
Nlug007204	5407	1436	0.266	-1.912	2.33905e-07	5.19502e-06	down
Nlug007205	209	62	0.297	-1.751	3.69217e-07	7.86558e-06	down
Nlug007206	174	82	0.473	-1.08	0.00198416	0.0123728	down
Nlug007217	189	482	2.551	1.351	2.27801e-05	0.00029974	up
Nlug007218	3303	107	0.032	-4.947	6.80985e-27	1.48095e-24	down
Nlug007219	10153	31	0.003	-8.331	1.61604e-35	6.65895e-33	down
Nlug007228	4557	11193	2.456	1.296	3.07789e-05	0.000390231	up
Nlug007274	171	50	0.295	-1.764	1.91525e-06	3.46293e-05	down
Nlug007275	195	61	0.314	-1.672	4.39039e-06	7.0944e-05	down
Nlug007276	1840	64	0.035	-4.835	1.76603e-15	1.27431e-13	down
Nlug007303	851	1923	2.259	1.176	0.000251966	0.00233311	up
Nlug007318	2955	6179	2.091	1.064	0.000630183	0.00502669	up
Nlug007332	1142	395	0.347	-1.529	0.00213693	0.0131629	down
Nlug007340	587	2049	3.488	1.802	5.86921e-06	9.20843e-05	up
Nlug007349	51	113	2.2	1.137	0.00615005	0.0299899	up
Nlug007358	440	209	0.475	-1.074	0.00294092	0.0169422	down
Nlug007367	1885	4133	2.192	1.132	0.00500126	0.0255413	up
Nlug007421	406	1661	4.089	2.032	9.76112e-10	3.20418e-08	up
Nlug007422	678	2394	3.53	1.82	2.85076e-07	6.21689e-06	up
Nlug007440	727	1675	2.304	1.204	6.23959e-05	0.000716272	up
Nlug007464	556	212	0.382	-1.387	0.00179725	0.0113794	down
Nlug007499	169	43	0.254	-1.977	2.41328e-06	4.23623e-05	down
Nlug007502	31	111	3.519	1.815	1.82542e-07	4.1484e-06	up
Nlug007520	499	1151	2.306	1.205	0.000213174	0.00203778	up
Nlug007522	839	1712	2.04	1.029	0.000465275	0.00388963	up
Nlug007544	1344	3103	2.308	1.207	0.000280963	0.00256072	up
Nlug007599	776	53	0.068	-3.874	1.60637e-24	2.79472e-22	down
Nlug007600	740	2419	3.266	1.708	5.59542e-05	0.000651576	up
Nlug007602	25	79	3.197	1.677	0.000490454	0.00406755	up
Nlug007606	1214	105	0.087	-3.527	2.6948e-10	9.63359e-09	down
Nlug007630	121	41	0.341	-1.552	0.00194124	0.0121535	down
Nlug007641	36	206	5.684	2.507	6.07737e-14	3.60452e-12	up
Nlug007648	149	348	2.332	1.221	3.02741e-05	0.000385079	up
Nlug007667	1088	99	0.091	-3.457	2.86344e-13	1.54606e-11	down
Nlug007679	1996	365	0.183	-2.45	1.65757e-08	4.56138e-07	down
Nlug007697	1708	4661	2.729	1.448	0.000141428	0.00144265	up
Nlug007701	1080	243	0.225	-2.151	7.02875e-09	2.04186e-07	down
Nlug007723	397	1058	2.668	1.416	6.64509e-06	0.00010231	up
Nlug007724	747	347	0.465	-1.105	7.36307e-05	0.00082824	down
Nlug007736	160	49	0.307	-1.701	1.83074e-05	0.000247545	down
Nlug007751	937	2139	2.284	1.191	0.000104732	0.00111999	up
Nlug007752	286	709	2.474	1.307	1.01689e-05	0.000148779	up
Nlug007759	57	189	3.32	1.731	1.46657e-06	2.72403e-05	up
Nlug007760	1039	3432	3.304	1.724	1.15996e-07	2.74775e-06	up
Nlug007799	6239	21615	3.464	1.793	3.71636e-10	1.3106e-08	up
Nlug007800	1488	4488	3.015	1.592	1.46137e-06	2.71759e-05	up
Nlug007809	1030	2235	2.17	1.117	0.000390559	0.00337121	up
Nlug007810	14	69	4.715	2.237	0.000216839	0.00206776	up
Nlug007820	275	1560	5.668	2.503	1.8236e-07	4.1484e-06	up
Nlug007823	35	83	2.326	1.218	0.00446972	0.0233601	up
Nlug007827	1419	3911	2.757	1.463	2.08475e-05	0.00027805	up
Nlug007836	218	530	2.431	1.281	0.000958096	0.00698086	up
Nlug007837	237	679	2.86	1.516	6.92309e-06	0.000106276	up
Nlug007845	631	1330	2.108	1.076	0.000185876	0.00182473	up
Nlug007882	203	71	0.35	-1.515	0.00425061	0.0224624	down
Nlug007886	143	294	2.048	1.034	0.00347051	0.0192905	up
Nlug007887	252	6	0.025	-5.301	2.78511e-10	9.91121e-09	down
Nlug007894	33	75	2.295	1.199	0.00304625	0.0173827	up
Nlug007908	53	148	2.8	1.486	0.000196085	0.00190229	up
Nlug007918	1101	366	0.333	-1.586	4.23491e-07	8.84136e-06	down
Nlug007925	6286	740	0.118	-3.086	1.00321e-11	4.43734e-10	down
Nlug007933	3264	63	0.019	-5.7	1.34777e-12	6.59483e-11	down
Nlug007934	132	294	2.211	1.145	0.000429991	0.00365317	up
Nlug007936	25	124	4.906	2.294	1.59664e-06	2.94813e-05	up
Nlug007940	251	517	2.057	1.041	0.00109528	0.00776367	up
Nlug007992	972	313	0.322	-1.635	0.00153184	0.0100992	down
Nlug008002	853	2630	3.085	1.625	0.000593614	0.00477637	up
Nlug008005	73	162	2.215	1.147	0.00153931	0.0101168	up
Nlug008006	1050	470	0.447	-1.16	0.00240758	0.0144936	down
Nlug008021	273	1	0.003	-8.375	8.14136e-19	8.17163e-17	down
Nlug008022	721	23	0.031	-4.991	1.62217e-07	3.71888e-06	down
Nlug008024	358	0	0	-11.486	6.47351e-21	8.10898e-19	down
Nlug008026	394	0	0.001	-9.703	1.78625e-36	7.76921e-34	down
Nlug008030	23	60	2.58	1.367	0.005099	0.0259305	up
Nlug008042	1666	3340	2.005	1.004	0.00106675	0.00759388	up
Nlug008046	65	135	2.089	1.063	0.000891727	0.00662679	up
Nlug008053	57	13	0.228	-2.134	0.000880277	0.00657415	down
Nlug008063	170	425	2.496	1.32	5.03686e-05	0.000593432	up
Nlug008068	473	171	0.361	-1.468	0.00281722	0.0163717	down
Nlug008071	445	180	0.404	-1.306	8.73203e-05	0.000956127	down
Nlug008155	766	2494	3.256	1.703	6.52528e-06	0.000100862	up
Nlug008156	2447	9055	3.699	1.887	8.45866e-06	0.000127352	up
Nlug008166	264	115	0.438	-1.191	8.12392e-05	0.000897069	down
Nlug008177	848	422	0.497	-1.008	0.000771776	0.00591506	down
Nlug008180	104	236	2.263	1.178	0.000218363	0.00207724	up
Nlug008196	135	325	2.41	1.269	4.31625e-05	0.00051942	up
Nlug008200	130	328	2.516	1.331	2.96438e-05	0.000377983	up
Nlug008202	73	147	2.005	1.004	0.00172365	0.0110323	up
Nlug008204	622	33	0.054	-4.223	4.17113e-11	1.70526e-09	down
Nlug008205	150	0	0.003	-8.309	3.7502e-10	1.31957e-08	down
Nlug008206	114	232	2.036	1.026	0.00174289	0.0111117	up
Nlug008265	41	169	4.05	2.018	4.62746e-09	1.38276e-07	up
Nlug008270	189	4	0.025	-5.35	3.97105e-10	1.38792e-08	down
Nlug008279	84	369	4.354	2.122	1.17287e-11	5.12984e-10	up
Nlug008294	22262	56	0.003	-8.631	2.87049e-39	1.49821e-36	down
Nlug008315	374	130	0.347	-1.526	0.000753249	0.0058006	down
Nlug008352	74	165	2.227	1.155	0.000918897	0.00675815	up
Nlug008375	736	1588	2.156	1.109	0.000739252	0.00572463	up
Nlug008387	961	357	0.372	-1.427	0.00502117	0.025618	down
Nlug008394	1492	4074	2.73	1.449	0.000144449	0.00146774	up
Nlug008398	181	452	2.5	1.322	3.06388e-05	0.00038877	up
Nlug008437	1149	2316	2.016	1.012	0.000563069	0.00457764	up
Nlug008441	274	33	0.12	-3.062	3.91192e-13	2.06238e-11	down
Nlug008474	309	104	0.337	-1.569	0.000177024	0.00174879	down
Nlug008475	216	93	0.428	-1.224	0.000368819	0.00321546	down
Nlug008481	197	57	0.288	-1.796	0.00123413	0.00855423	down
Nlug008491	57	124	2.17	1.118	0.000889256	0.00661157	up
Nlug008502	19133	78726	4.115	2.041	3.62046e-20	4.16832e-18	up
Nlug008522	355	756	2.13	1.091	0.00134442	0.00911295	up
Nlug008529	83	38	0.454	-1.14	0.0107907	0.0458884	down
Nlug008554	1560	646	0.414	-1.271	7.43841e-05	0.000834915	down
Nlug008555	81	227	2.794	1.483	9.9973e-07	1.93018e-05	up
Nlug008558	200	17	0.082	-3.6	2.01793e-09	6.3961e-08	down
Nlug008567	43	100	2.33	1.221	0.00604666	0.029652	up
Nlug008569	252	739	2.931	1.552	9.78828e-07	1.8945e-05	up
Nlug008574	46	106	2.27	1.183	0.000631552	0.00502993	up
Nlug008576	55	202	3.672	1.877	2.20254e-07	4.92565e-06	up
Nlug008588	134	325	2.42	1.275	3.32485e-05	0.000416818	up
Nlug008589	125	307	2.459	1.298	0.000230681	0.00216807	up
Nlug008638	1236	3769	3.049	1.608	1.12026e-05	0.000160193	up
Nlug008652	157	346	2.204	1.14	0.0012838	0.00880114	up
Nlug008655	184	46	0.253	-1.983	3.84905e-06	6.37086e-05	down
Nlug008706	1740	552	0.318	-1.655	9.64264e-06	0.000142438	down
Nlug008707	799	74	0.092	-3.435	1.10383e-12	5.48689e-11	down
Nlug008719	322	684	2.122	1.085	0.00011233	0.00118762	up
Nlug008721	3263	741	0.227	-2.138	2.8205e-08	7.36394e-07	down
Nlug008725	133	26	0.2	-2.325	1.32164e-09	4.26685e-08	down
Nlug008732	204	615	3.006	1.588	2.4223e-08	6.47242e-07	up
Nlug008737	574	1229	2.142	1.099	0.000415304	0.00353799	up
Nlug008764	703	1752	2.489	1.316	2.81778e-05	0.000361646	up
Nlug008774	147	324	2.194	1.133	0.000790147	0.00601757	up
Nlug008780	24	97	4.046	2.017	6.3273e-06	9.78981e-05	up
Nlug008787	66	192	2.923	1.547	7.7806e-06	0.000117731	up
Nlug008789	64	194	3.05	1.609	3.02208e-06	5.1323e-05	up
Nlug008792	162	330	2.032	1.023	0.00168945	0.0108509	up
Nlug008808	36	128	3.538	1.823	6.15134e-05	0.000707178	up
Nlug008843	5171	10783	2.085	1.06	0.00322063	0.0181529	up
Nlug008848	1031	2627	2.547	1.349	1.14926e-05	0.000163444	up
Nlug008874	18	63	3.388	1.76	0.00104049	0.00747682	up
Nlug008876	16642	1078	0.065	-3.949	1.49639e-09	4.82108e-08	down
Nlug008882	34	118	3.491	1.804	4.38711e-07	9.09845e-06	up
Nlug008883	440	165	0.374	-1.418	0.00104128	0.0074791	down
Nlug008885	612	1813	2.963	1.567	0.000395279	0.00340258	up
Nlug008896	3155	1165	0.369	-1.437	0.000204252	0.00196811	down
Nlug008935	55	141	2.584	1.369	0.000209898	0.0020126	up
Nlug008938	28	88	3.077	1.622	0.000265194	0.00243972	up
Nlug008966	22	78	3.615	1.854	0.00816927	0.0371089	up
Nlug009004	269	750	2.784	1.477	1.91397e-05	0.000257465	up
Nlug009009	152	56	0.369	-1.439	0.000329796	0.00292244	down
Nlug009017	269	83	0.308	-1.701	3.23939e-05	0.000408722	down
Nlug009020	2448	92	0.038	-4.726	8.17493e-20	8.95126e-18	down
Nlug009021	47	138	2.918	1.545	3.19929e-06	5.39811e-05	up
Nlug009025	216	467	2.159	1.111	0.000888775	0.00661113	up
Nlug009026	201	408	2.033	1.023	0.000974132	0.00706483	up
Nlug009050	560	1230	2.194	1.133	0.000102182	0.00109737	up
Nlug009069	976	27	0.028	-5.161	4.22779e-18	4.01205e-16	down
Nlug009070	30	176	5.758	2.525	2.01671e-09	6.3961e-08	up
Nlug009081	107	0	0.001	-9.747	1.25045e-10	4.6618e-09	down
Nlug009084	77	2	0.024	-5.375	5.62103e-06	8.84564e-05	down
Nlug009104	81	34	0.424	-1.239	0.00765083	0.0352758	down
Nlug009108	267	597	2.232	1.158	0.00012105	0.00126529	up
Nlug009111	126	606	4.8	2.263	3.72962e-11	1.52924e-09	up
Nlug009133	1975	218	0.11	-3.182	2.20552e-13	1.20749e-11	down
Nlug009178	2088	4912	2.352	1.234	0.000945193	0.00690613	up
Nlug009185	275	717	2.606	1.382	1.39081e-06	2.60806e-05	up
Nlug009210	94	236	2.501	1.323	0.000479274	0.00399285	up
Nlug009211	292	1398	4.785	2.259	2.07259e-10	7.52959e-09	up
Nlug009217	3613	1083	0.3	-1.737	0.00198609	0.0123799	down
Nlug009223	34	84	2.468	1.303	0.0033695	0.0188563	up
Nlug009227	30	70	2.273	1.185	0.00691544	0.032773	up
Nlug009242	196	647	3.294	1.72	3.11182e-09	9.59151e-08	up
Nlug009285	82	427	5.168	2.37	5.97085e-15	3.97837e-13	up
Nlug009320	251	508	2.023	1.016	0.00168951	0.0108509	up
Nlug009341	210	4	0.019	-5.734	2.80993e-09	8.78203e-08	down
Nlug009375	326	27	0.083	-3.597	2.05949e-16	1.66224e-14	down
Nlug009376	186	29	0.155	-2.693	2.42043e-06	4.24401e-05	down
Nlug009377	61	7	0.111	-3.17	0.0016492	0.0106531	down
Nlug009396	637	179	0.282	-1.827	1.90485e-06	3.4481e-05	down
Nlug009400	260	53	0.204	-2.296	3.7308e-11	1.52924e-09	down
Nlug009405	45	90	2.003	1.002	0.0062758	0.0303854	up
Nlug009412	81	370	4.572	2.193	1.42853e-05	0.000197806	up
Nlug009416	661	1416	2.143	1.1	0.000919484	0.00675928	up
Nlug009421	7952	21316	2.681	1.423	1.44728e-06	2.6978e-05	up
Nlug009434	18510	62022	3.351	1.745	7.49478e-11	2.94118e-09	up
Nlug009448	154	341	2.216	1.148	0.00174646	0.0111299	up
Nlug009457	908	366	0.403	-1.313	0.0020239	0.0125655	down
Nlug009461	622	1628	2.617	1.388	1.69399e-05	0.000230448	up
Nlug009468	132	298	2.254	1.172	0.00288078	0.0166448	up
Nlug009497	224	466	2.084	1.059	0.000760097	0.00584271	up
Nlug009508	1626	3511	2.159	1.11	0.00260473	0.0154008	up
Nlug009535	106	343	3.221	1.688	5.3768e-07	1.0948e-05	up
Nlug009547	4803	526	0.109	-3.192	2.94391e-11	1.22595e-09	down
Nlug009619	925	174	0.189	-2.407	8.68632e-14	5.07501e-12	down
Nlug009626	376	9	0.025	-5.305	6.35136e-10	2.12954e-08	down
Nlug009643	63	133	2.108	1.076	0.00161019	0.0104703	up
Nlug009649	269	619	2.299	1.201	0.000252974	0.00233968	up
Nlug009656	257	539	2.095	1.067	0.00016324	0.00162389	up
Nlug009657	58	150	2.567	1.36	3.30141e-05	0.000415007	up
Nlug009666	120	338	2.821	1.496	2.1063e-05	0.000279918	up
Nlug009667	92	190	2.071	1.05	0.00361368	0.0199421	up
Nlug009683	461	1569	3.403	1.767	1.71858e-08	4.70447e-07	up
Nlug009686	1187	508	0.428	-1.223	0.000127319	0.00132024	down
Nlug009688	116	44	0.383	-1.384	0.000291941	0.00263927	down
Nlug009693	436	159	0.365	-1.454	0.00194335	0.0121618	down
Nlug009697	148	67	0.453	-1.141	0.00227701	0.0138406	down
Nlug009706	2711	7327	2.702	1.434	0.00198356	0.0123728	up
Nlug009711	56	163	2.902	1.537	2.4809e-06	4.32605e-05	up
Nlug009712	125	318	2.536	1.343	0.000154622	0.00155098	up
Nlug009716	101	211	2.082	1.058	0.00123359	0.00855423	up
Nlug009718	26	105	3.97	1.989	4.45409e-07	9.18869e-06	up
Nlug009746	96	37	0.384	-1.382	0.00443462	0.0232078	down
Nlug009754	351	896	2.553	1.352	3.03026e-05	0.000385128	up
Nlug009755	50	136	2.742	1.455	6.31737e-06	9.78981e-05	up
Nlug009761	460	2138	4.641	2.214	3.69416e-11	1.52219e-09	up
Nlug009762	105	216	2.061	1.043	0.00312879	0.0177309	up
Nlug009775	1235	584	0.473	-1.08	0.00039779	0.00342043	down
Nlug009782	123	402	3.246	1.699	7.50476e-09	2.16209e-07	up
Nlug009798	1369	46	0.034	-4.891	4.48146e-07	9.23298e-06	down
Nlug009816	1878	736	0.392	-1.352	0.00297571	0.0171006	down
Nlug009818	227	109	0.481	-1.057	0.00369057	0.0202426	down
Nlug009825	112	17	0.151	-2.731	5.50122e-08	1.38486e-06	down
Nlug009838	94	387	4.11	2.039	2.85071e-07	6.21689e-06	up
Nlug009839	14	59	4.074	2.026	0.00567976	0.0281971	up
Nlug009862	58	133	2.31	1.208	0.000672125	0.0052965	up
Nlug009871	3157	7767	2.46	1.299	7.43536e-05	0.000834915	up
Nlug009873	520	2789	5.358	2.422	5.39379e-10	1.84805e-08	up
Nlug009883	965	20	0.021	-5.548	5.34944e-31	1.64238e-28	down
Nlug009884	296	7	0.025	-5.318	9.44202e-29	2.38457e-26	down
Nlug009886	397	3	0.008	-6.928	5.6768e-18	5.25961e-16	down
Nlug009887	2775	15	0.005	-7.521	1.40831e-18	1.40455e-16	down
Nlug009895	974	48	0.05	-4.334	2.86313e-12	1.33823e-10	down
Nlug009897	22	68	3.184	1.671	0.00369352	0.0202426	up
Nlug009917	121	345	2.84	1.506	0.000250166	0.00232331	up
Nlug009927	960	4166	4.338	2.117	7.41181e-09	2.14122e-07	up
Nlug009933	112	269	2.392	1.258	6.33647e-05	0.000725836	up
Nlug009977	740	1651	2.229	1.157	6.57763e-05	0.000749037	up
Nlug009998	26	77	2.953	1.562	0.000689739	0.00541079	up
Nlug009999	15	56	3.684	1.881	0.000207528	0.00199476	up
Nlug010000	51	141	2.748	1.458	5.73405e-06	9.00539e-05	up
Nlug010014	16877	1245	0.074	-3.76	3.84338e-07	8.12141e-06	down
Nlug010015	6266	169	0.027	-5.215	3.09652e-07	6.70612e-06	down
Nlug010016	5595	443	0.079	-3.659	1.01764e-05	0.000148779	down
Nlug010018	14946	714	0.048	-4.387	4.44169e-07	9.18732e-06	down
Nlug010019	10550	22	0.002	-8.904	4.65238e-10	1.61166e-08	down
Nlug010021	5000	39	0.008	-7.016	3.04238e-08	7.92639e-07	down
Nlug010022	299	35	0.118	-3.087	0.000606237	0.00486294	down
Nlug010024	4466	70	0.016	-5.995	4.6381e-47	5.18739e-44	down
Nlug010027	12687	37977	2.993	1.582	8.06805e-08	1.98944e-06	up
Nlug010043	170	427	2.514	1.33	4.32717e-06	7.00671e-05	up
Nlug010048	200	449	2.243	1.165	7.44395e-05	0.000834938	up
Nlug010058	125	33	0.26	-1.944	0.000667393	0.0052645	down
Nlug010081	111	255	2.295	1.199	0.000108531	0.00115604	up
Nlug010086	83	39	0.472	-1.083	0.0031284	0.0177309	down
Nlug010111	147	66	0.448	-1.159	0.00612639	0.0299024	down
Nlug010120	482	1293	2.681	1.423	2.39972e-05	0.000314145	up
Nlug010121	473	1252	2.648	1.405	3.30427e-06	5.56326e-05	up
Nlug010123	140	493	3.511	1.812	1.32111e-07	3.09207e-06	up
Nlug010184	23	191	8.207	3.037	7.5639e-12	3.38387e-10	up
Nlug010197	43	125	2.848	1.51	0.00176019	0.0112037	up
Nlug010200	14	72	5.001	2.322	8.5155e-07	1.67087e-05	up
Nlug010202	381	991	2.6	1.379	8.90859e-05	0.000972739	up
Nlug010203	116	253	2.171	1.118	0.000323647	0.00287283	up
Nlug010242	817	1949	2.386	1.255	0.00654251	0.0314468	up
Nlug010254	17	73	4.273	2.095	5.29467e-05	0.000620538	up
Nlug010286	349	766	2.192	1.132	0.000183897	0.00180643	up
Nlug010308	61	148	2.436	1.285	0.00131974	0.00898515	up
Nlug010311	233	470	2.016	1.011	0.00102766	0.00739508	up
Nlug010331	2906	13	0.005	-7.768	8.82381e-65	6.90816e-61	down
Nlug010332	1135	13	0.011	-6.487	2.13022e-41	1.28288e-38	down
Nlug010334	1438	613	0.426	-1.23	0.00703189	0.0332143	down
Nlug010340	388	1028	2.652	1.407	7.73186e-06	0.000117198	up
Nlug010346	36	142	3.875	1.954	1.0479e-07	2.52043e-06	up
Nlug010355	8786	538	0.061	-4.03	6.13054e-13	3.17725e-11	down
Nlug010358	559	1298	2.323	1.216	0.000157262	0.00157541	up
Nlug010369	19	75	3.949	1.981	2.40153e-05	0.000314145	up
Nlug010373	1641	626	0.382	-1.39	0.00932909	0.0411015	down
Nlug010429	1137	149	0.131	-2.931	1.44527e-10	5.32473e-09	down
Nlug010431	533	24	0.045	-4.487	2.49891e-30	7.11418e-28	down
Nlug010433	299	77	0.257	-1.96	0.000103297	0.00110631	down
Nlug010442	5148	227	0.044	-4.503	2.21816e-23	3.50829e-21	down
Nlug010461	9	54	6.17	2.625	0.00117963	0.00826707	up
Nlug010463	16	55	3.383	1.758	0.010535	0.0450393	up
Nlug010470	156	457	2.923	1.548	4.14276e-06	6.76389e-05	up
Nlug010471	308	673	2.18	1.124	7.09048e-05	0.000800452	up
Nlug010472	24	121	4.92	2.299	1.55358e-08	4.29788e-07	up
Nlug010486	68	182	2.67	1.417	0.000931047	0.00682187	up
Nlug010493	37	96	2.555	1.354	0.00197953	0.0123587	up
Nlug010508	1587	3601	2.269	1.182	0.00047632	0.00397348	up
Nlug010535	136	307	2.255	1.173	8.94481e-05	0.000976013	up
Nlug010540	3945	1433	0.363	-1.461	0.010303	0.0443171	down
Nlug010547	1402	584	0.417	-1.263	0.000438199	0.00370059	down
Nlug010569	964	2072	2.149	1.104	0.00100214	0.00724448	up
Nlug010583	364	0	0.001	-9.59	3.64334e-16	2.8667e-14	down
Nlug010595	1172	3487	2.974	1.572	1.0878e-05	0.000156408	up
Nlug010637	243	553	2.278	1.188	0.0020521	0.0127055	up
Nlug010647	331	127	0.383	-1.383	3.17998e-06	5.37349e-05	down
Nlug010672	1059	2345	2.216	1.148	0.000230117	0.00216407	up
Nlug010677	551	264	0.479	-1.061	0.000574085	0.00464893	down
Nlug010726	96	233	2.415	1.272	0.000103247	0.00110631	up
Nlug010760	355	1125	3.164	1.662	0.00125303	0.00863555	up
Nlug010762	900	21	0.024	-5.4	1.14811e-29	3.09949e-27	down
Nlug010764	555	20	0.036	-4.799	5.30739e-21	6.75635e-19	down
Nlug010765	360	20	0.055	-4.174	5.56758e-25	1.01369e-22	down
Nlug010768	725	324	0.447	-1.161	5.77324e-05	0.0006716	down
Nlug010776	179	63	0.355	-1.493	0.00140718	0.00944839	down
Nlug010780	298	690	2.315	1.211	0.00754601	0.0348953	up
Nlug010781	203	506	2.493	1.318	9.59433e-06	0.000141858	up
Nlug010787	109	228	2.084	1.059	0.000568391	0.00460655	up
Nlug010791	64	159	2.46	1.298	0.000274548	0.00251222	up
Nlug010827	72	9	0.123	-3.028	1.66288e-05	0.00022661	down
Nlug010833	2917	350	0.12	-3.057	8.34742e-11	3.22726e-09	down
Nlug010835	831	94	0.113	-3.147	5.7955e-11	2.30906e-09	down
Nlug010854	32	74	2.274	1.185	0.0105241	0.0450112	up
Nlug010855	52	118	2.272	1.184	0.000354104	0.00311317	up
Nlug010857	174	391	2.247	1.168	0.000125004	0.00129881	up
Nlug010885	94	199	2.121	1.084	0.00127605	0.00875568	up
Nlug010886	756	67	0.088	-3.499	7.59042e-21	9.35833e-19	down
Nlug010906	540	1397	2.589	1.373	1.50335e-06	2.78903e-05	up
Nlug010908	160	341	2.123	1.086	0.000220488	0.00209552	up
Nlug010909	74	247	3.31	1.727	2.0491e-07	4.61651e-06	up
Nlug010930	2437	1005	0.412	-1.278	0.0106315	0.0453715	down
Nlug010966	748	40	0.054	-4.221	1.5846e-17	1.40976e-15	down
Nlug010967	531	4	0.008	-6.948	5.90714e-24	9.93321e-22	down
Nlug010968	2456	5481	2.232	1.158	0.00118168	0.00827495	up
Nlug010975	305	776	2.548	1.349	0.000873919	0.00653478	up
Nlug010983	444	1110	2.502	1.323	0.000735941	0.00571033	up
Nlug011000	117	296	2.521	1.334	3.77955e-05	0.000464523	up
Nlug011023	533	1334	2.502	1.323	5.94072e-06	9.28364e-05	up
Nlug011045	147	1449	9.886	3.305	1.00319e-13	5.79632e-12	up
Nlug011068	1522	527	0.347	-1.529	0.00944965	0.0415096	down
Nlug011094	53	121	2.298	1.2	0.00101681	0.00733357	up
Nlug011096	263	715	2.72	1.444	2.62284e-06	4.52795e-05	up
Nlug011097	145	525	3.615	1.854	3.70472e-09	1.13077e-07	up
Nlug011098	444	930	2.092	1.065	0.00125561	0.00864	up
Nlug011101	1154	3141	2.721	1.444	1.1256e-05	0.000160809	up
Nlug011115	2076	4319	2.08	1.057	0.00156237	0.0102144	up
Nlug011127	492	1353	2.746	1.457	4.71935e-06	7.55579e-05	up
Nlug011132	13	74	5.766	2.527	5.60367e-07	1.13656e-05	up
Nlug011140	598	207	0.347	-1.526	0.00107874	0.00766028	down
Nlug011165	437	66	0.152	-2.715	6.18681e-07	1.24277e-05	down
Nlug011182	739	92	0.124	-3.011	2.9211e-12	1.35376e-10	down
Nlug011184	261	89	0.34	-1.556	0.000482898	0.00401338	down
Nlug011185	118	294	2.485	1.313	0.00136523	0.00922603	up
Nlug011231	293	621	2.118	1.083	0.000216459	0.0020654	up
Nlug011232	48	161	3.345	1.742	3.54286e-06	5.93307e-05	up
Nlug011234	20	111	5.533	2.468	2.82179e-08	7.36394e-07	up
Nlug011251	87	370	4.246	2.086	1.54303e-12	7.52669e-11	up
Nlug011272	68	181	2.676	1.42	1.40576e-05	0.00019531	up
Nlug011289	584	1294	2.217	1.148	0.00147619	0.0098233	up
Nlug011290	5898	54	0.009	-6.753	3.93286e-49	4.73698e-46	down
Nlug011297	411	1256	3.054	1.611	5.11744e-07	1.04471e-05	up
Nlug011300	61	239	3.885	1.958	3.44578e-08	8.93279e-07	up
Nlug011309	67	15	0.236	-2.081	0.00248886	0.0148573	down
Nlug011312	323	784	2.427	1.279	7.48982e-06	0.000114081	up
Nlug011322	117	7	0.061	-4.044	8.0723e-06	0.000121769	down
Nlug011323	97	201	2.073	1.051	0.000970367	0.00704731	up
Nlug011329	43	110	2.548	1.35	0.000595554	0.00478706	up
Nlug011332	146	307	2.111	1.078	0.00020181	0.00194817	up
Nlug011334	469	55	0.118	-3.083	1.35342e-14	8.68516e-13	down
Nlug011355	21	60	2.928	1.55	0.00191518	0.0120247	up
Nlug011361	316	107	0.34	-1.554	0.0117545	0.0489238	down
Nlug011374	975	315	0.323	-1.629	3.9637e-08	1.01911e-06	down
Nlug011386	813	405	0.498	-1.006	0.000320326	0.00284981	down
Nlug011407	53	167	3.131	1.646	2.08714e-07	4.68873e-06	up
Nlug011437	954	2165	2.27	1.183	0.000114032	0.00120345	up
Nlug011453	288	135	0.468	-1.096	0.00717177	0.0336617	down
Nlug011482	30	126	4.129	2.046	0.000162162	0.00161523	up
Nlug011486	793	6147	7.751	2.954	2.13702e-13	1.17408e-11	up
Nlug011489	283	19	0.068	-3.881	4.97831e-17	4.28299e-15	down
Nlug011502	133	309	2.331	1.221	0.000202451	0.00195316	up
Nlug011503	67	4	0.059	-4.08	3.72586e-07	7.90962e-06	down
Nlug011505	573	4	0.008	-6.948	1.58351e-22	2.27473e-20	down
Nlug011520	29	84	2.956	1.564	0.00166092	0.0107112	up
Nlug011527	1427	535	0.375	-1.413	0.00179057	0.0113463	down
Nlug011542	740	82	0.111	-3.165	7.51166e-09	2.16209e-07	down
Nlug011596	14060	417	0.03	-5.076	1.16896e-43	7.95808e-41	down
Nlug011600	726	1963	2.705	1.436	2.34904e-06	4.13272e-05	up
Nlug011602	351	118	0.335	-1.576	0.00341946	0.0190541	down
Nlug011605	47	181	3.861	1.949	3.19383e-07	6.8978e-06	up
Nlug011608	16	67	4.212	2.075	6.33681e-05	0.000725836	up
Nlug011617	242	68	0.28	-1.835	0.001056	0.00754672	down
Nlug011618	1188	330	0.277	-1.85	1.09807e-07	2.6108e-06	down
Nlug011653	818	311	0.38	-1.397	3.2298e-05	0.000407841	down
Nlug011660	93	208	2.248	1.168	0.000512122	0.00421377	up
Nlug011676	10808	32010	2.962	1.566	1.85647e-05	0.000250376	up
Nlug011689	21	73	3.394	1.763	4.68073e-05	0.000556498	up
Nlug011721	861	422	0.491	-1.027	0.000460944	0.00385548	down
Nlug011726	717	1571	2.188	1.13	0.000450327	0.00378078	up
Nlug011727	105	262	2.488	1.315	7.49136e-05	0.000839054	up
Nlug011747	47	126	2.679	1.422	3.7134e-05	0.000458452	up
Nlug011764	277	591	2.132	1.092	0.00393922	0.0212764	up
Nlug011795	1067	451	0.423	-1.241	9.20189e-05	0.00099919	down
Nlug011802	2323	6130	2.639	1.4	4.12624e-05	0.000499681	up
Nlug011809	62	11	0.177	-2.501	0.000164336	0.00163376	down
Nlug011862	602	0	0	-12.234	1.87416e-28	4.58524e-26	down
Nlug011868	243	0	0.001	-10.927	6.79448e-27	1.48095e-24	down
Nlug011891	382	997	2.609	1.384	4.41646e-06	7.12182e-05	up
Nlug011906	148	473	3.183	1.67	5.10768e-08	1.29621e-06	up
Nlug011909	46	95	2.044	1.031	0.00700664	0.0331325	up
Nlug011918	180	63	0.35	-1.513	1.82051e-05	0.000246588	down
Nlug011920	280	576	2.057	1.041	0.00192255	0.0120606	up
Nlug011928	167	30	0.179	-2.479	5.1378e-06	8.14248e-05	down
Nlug011964	84	269	3.182	1.67	3.50683e-07	7.49112e-06	up
Nlug011974	1737	565	0.325	-1.619	0.00150355	0.00996363	down
Nlug012003	1630	108	0.066	-3.913	4.4684e-17	3.88701e-15	down
Nlug012005	946	207	0.219	-2.19	9.67399e-06	0.000142767	down
Nlug012013	23	63	2.754	1.462	0.0105364	0.0450393	up
Nlug012016	229	1563	6.806	2.767	9.03142e-13	4.54707e-11	up
Nlug012018	162	367	2.262	1.178	0.00140113	0.00941989	up
Nlug012070	96	455	4.742	2.246	1.04796e-12	5.24249e-11	up
Nlug012095	59	2	0.031	-4.989	7.35507e-07	1.45228e-05	down
Nlug012097	787	10	0.013	-6.212	1.22645e-09	3.97594e-08	down
Nlug012099	34388	243	0.007	-7.142	1.31485e-13	7.45939e-12	down
Nlug012125	3216	7409	2.304	1.204	0.000284268	0.00258332	up
Nlug012126	49	119	2.441	1.287	0.000555368	0.00452208	up
Nlug012128	50	109	2.152	1.106	0.00224786	0.0136847	up
Nlug012131	84	234	2.77	1.47	8.52826e-05	0.000937092	up
Nlug012133	358	178	0.499	-1.002	0.0051326	0.0260845	down
Nlug012135	964	466	0.484	-1.048	0.00809985	0.0368577	down
Nlug012143	22	113	5.094	2.349	1.08358e-08	3.07368e-07	up
Nlug012144	44	103	2.343	1.228	0.000609188	0.00488411	up
Nlug012178	331	159	0.481	-1.057	0.00671627	0.0321011	down
Nlug012219	1949	173	0.089	-3.495	6.92717e-20	7.63842e-18	down
Nlug012229	1891	5193	2.745	1.457	4.90248e-05	0.000580219	up
Nlug012240	474	2332	4.922	2.299	3.4278e-07	7.35241e-06	up
Nlug012241	98	37	0.379	-1.399	0.000600533	0.0048246	down
Nlug012254	39	112	2.921	1.546	9.19683e-05	0.00099919	up
Nlug012257	180	54	0.3	-1.738	5.46706e-05	0.000638353	down
Nlug012322	50	8	0.162	-2.624	0.0047488	0.0245078	down
Nlug012336	664	274	0.412	-1.278	0.00712648	0.0335195	down
Nlug012345	102	214	2.094	1.066	0.000450564	0.00378078	up
Nlug012351	1644	734	0.447	-1.163	0.000170865	0.00169652	down
Nlug012352	2503	493	0.197	-2.343	9.36444e-11	3.60621e-09	down
Nlug012358	49	103	2.098	1.069	0.00591005	0.0290995	up
Nlug012362	665	2717	4.086	2.031	2.6592e-08	7.02155e-07	up
Nlug012365	168	355	2.11	1.077	0.00025131	0.00233117	up
Nlug012373	266	85	0.319	-1.648	0.00200197	0.0124689	down
Nlug012382	477	198	0.414	-1.272	0.000811104	0.00614728	down
Nlug012389	6956	3425	0.492	-1.022	0.0012292	0.00852759	down
Nlug012394	655	311	0.475	-1.073	0.000200616	0.00193784	down
Nlug012395	1441	591	0.41	-1.286	0.000147856	0.00149363	down
Nlug012413	2128	4335	2.038	1.027	0.00128733	0.0088176	up
Nlug012414	277	666	2.4	1.263	5.79291e-05	0.000673227	up
Nlug012415	85	175	2.058	1.041	0.00131099	0.00894526	up
Nlug012420	112	243	2.166	1.115	0.000745387	0.00575838	up
Nlug012423	2315	5367	2.318	1.213	0.000142683	0.00145262	up
Nlug012447	670	1909	2.852	1.512	3.44437e-06	5.78049e-05	up
Nlug012448	596	1832	3.072	1.619	1.71538e-05	0.000233154	up
Nlug012450	227	584	2.568	1.36	0.000223979	0.00211958	up
Nlug012451	29	106	3.695	1.885	6.98981e-07	1.38715e-05	up
Nlug012487	4937	10493	2.125	1.088	0.000320929	0.00285356	up
Nlug012489	91	2	0.024	-5.359	4.0274e-09	1.22687e-07	down
Nlug012494	937	360	0.384	-1.381	2.67401e-05	0.000345174	down
Nlug012498	177	455	2.562	1.357	1.93116e-05	0.000259332	up
Nlug012531	818	29	0.035	-4.818	7.69373e-21	9.4116e-19	down
Nlug012546	199	503	2.528	1.338	1.42878e-05	0.000197806	up
Nlug012548	40	92	2.266	1.18	0.00089455	0.00664147	up
Nlug012549	289	107	0.371	-1.429	3.93286e-05	0.000480724	down
Nlug012583	764	80	0.105	-3.255	2.07109e-12	9.91717e-11	down
Nlug012587	2987	10033	3.359	1.748	8.99484e-05	0.000980789	up
Nlug012620	220	88	0.401	-1.317	0.00287781	0.0166399	down
Nlug012621	116	43	0.373	-1.422	0.00438873	0.0230136	down
Nlug012661	131	53	0.402	-1.313	0.000348601	0.00307169	down
Nlug012662	68	164	2.405	1.266	0.000386503	0.00334542	up
Nlug012669	225	80	0.355	-1.493	0.000400355	0.00343494	down
Nlug012681	249	56	0.227	-2.142	0.000432461	0.00366818	down
Nlug012682	543	1210	2.23	1.157	0.0102608	0.0442235	up
Nlug012688	29	81	2.718	1.443	0.00019842	0.00191899	up
Nlug012690	143	431	3.025	1.597	3.58748e-06	5.98782e-05	up
Nlug012740	292	1945	6.665	2.737	2.53818e-09	7.98047e-08	up
Nlug012760	188	377	2.002	1.001	0.00109651	0.0077653	up
Nlug012790	820	3008	3.666	1.874	1.13508e-06	2.16746e-05	up
Nlug012795	245	545	2.222	1.152	4.52806e-05	0.000539987	up
Nlug012806	46	107	2.331	1.221	0.00337246	0.018866	up
Nlug012816	43	2	0.059	-4.073	0.0041982	0.0222606	down
Nlug012822	146	307	2.099	1.07	0.00859475	0.0386417	up
Nlug012833	116	47	0.405	-1.305	0.00198044	0.0123594	down
Nlug012834	1360	5549	4.082	2.029	1.10911e-07	2.63127e-06	up
Nlug012838	164	4	0.028	-5.147	6.746e-21	8.38324e-19	down
Nlug012845	232	12	0.055	-4.197	1.59312e-08	4.3995e-07	down
Nlug012850	55	2	0.04	-4.639	1.05088e-05	0.000152782	down
Nlug012861	4	0	0.029	-5.124	0.00338508	0.0189226	down
Nlug012862	78	24	0.31	-1.69	0.00106709	0.00759388	down
Nlug012900	317	11	0.036	-4.814	2.03372e-14	1.27888e-12	down
Nlug012924	133	387	2.896	1.534	3.89748e-05	0.000477144	up
Nlug012927	277	836	3.013	1.591	3.66293e-05	0.000454111	up
Nlug012934	2204	610	0.277	-1.854	5.94086e-06	9.28364e-05	down
Nlug012936	1127	3010	2.669	1.417	1.07429e-05	0.000154943	up
Nlug012939	1516	364	0.24	-2.058	1.73315e-08	4.72782e-07	down
Nlug012942	652	1637	2.51	1.328	2.48715e-05	0.000324531	up
Nlug012946	179	13	0.072	-3.788	5.80267e-08	1.45606e-06	down
Nlug012947	111	26	0.24	-2.061	0.000114058	0.00120345	down
Nlug012970	234	112	0.477	-1.067	0.00422622	0.0223561	down
Nlug012977	551	42	0.076	-3.719	3.47456e-21	4.4594e-19	down
Nlug012978	931	192	0.206	-2.279	1.91952e-07	4.33706e-06	down
Nlug012981	869	97	0.111	-3.168	1.28237e-11	5.57761e-10	down
Nlug012983	101	5	0.053	-4.245	1.60067e-12	7.78363e-11	down
Nlug012997	641	79	0.123	-3.024	0.0119969	0.0496358	down
Nlug012998	127	255	2.004	1.003	0.00261236	0.0154298	up
Nlug013011	361	808	2.238	1.162	0.000286095	0.00259691	up
Nlug013013	687	1601	2.33	1.22	0.000103013	0.00110554	up
Nlug013016	68	142	2.096	1.068	0.00861702	0.0386495	up
Nlug013102	1284	3660	2.851	1.511	1.1038e-05	0.000158127	up
Nlug013103	1066	2226	2.088	1.062	0.00083609	0.00629399	up
Nlug013105	30	88	2.904	1.538	7.03149e-05	0.000795513	up
Nlug013171	87	278	3.184	1.671	2.33965e-06	4.12084e-05	up
Nlug013178	117	247	2.103	1.073	0.000539788	0.00441588	up
Nlug013183	207	72	0.347	-1.526	7.24408e-05	0.00081544	down
Nlug013191	277	578	2.089	1.063	0.000301004	0.00270093	up
Nlug013198	536	65	0.122	-3.038	0.000252921	0.00233968	down
Nlug013200	154	326	2.11	1.077	0.000619537	0.00495439	up
Nlug013201	158	362	2.283	1.191	0.000242401	0.00225655	up
Nlug013204	76	34	0.453	-1.142	0.00664002	0.0318052	down
Nlug013206	150	305	2.02	1.015	0.001896	0.0119179	up
Nlug013222	67	141	2.112	1.078	0.00314832	0.0178223	up
Nlug013225	164	76	0.461	-1.118	0.00429823	0.0226758	down
Nlug013247	905	5	0.006	-7.503	2.19434e-35	8.81001e-33	down
Nlug013251	203	3	0.014	-6.126	5.08276e-13	2.65286e-11	down
Nlug013265	66	0	0.002	-9.058	3.75724e-08	9.69207e-07	down
Nlug013266	128	0	0.001	-9.998	1.84777e-19	1.95489e-17	down
Nlug013271	1420	1	0.001	-10.756	5.4057e-29	1.41071e-26	down
Nlug013273	388	0	0	-11.601	2.19217e-19	2.28833e-17	down
Nlug013274	120	265	2.208	1.143	0.000268201	0.00246394	up
Nlug013286	2658	264	0.099	-3.334	0.00142323	0.00952349	down
Nlug013313	2603	974	0.374	-1.417	2.93152e-05	0.000374097	down
Nlug013349	32	82	2.493	1.318	0.0017267	0.0110399	up
Nlug013366	931	344	0.37	-1.436	0.00685223	0.0325522	down
Nlug013378	431	196	0.454	-1.138	0.000683232	0.0053705	down
Nlug013381	599	254	0.425	-1.233	0.00625968	0.0303355	down
Nlug013388	34319	192586	5.612	2.488	1.28411e-12	6.32284e-11	up
Nlug013450	1847	498	0.27	-1.89	4.34445e-05	0.000522068	down
Nlug013453	217	440	2.027	1.019	0.000833906	0.00628057	up
Nlug013455	114	43	0.377	-1.408	0.00350897	0.019449	down
Nlug013507	77	20	0.261	-1.94	0.000348916	0.00307274	down
Nlug013509	2653	6971	2.628	1.394	0.000104789	0.00111999	up
Nlug013539	22	67	3.085	1.625	0.00355905	0.019664	up
Nlug013544	203	100	0.491	-1.025	0.00272403	0.0159569	down
Nlug013557	576	149	0.259	-1.947	2.8442e-05	0.000364141	down
Nlug013560	482	65	0.134	-2.897	1.37905e-11	5.98147e-10	down
Nlug013561	949	20	0.021	-5.573	4.49984e-32	1.46789e-29	down
Nlug013585	1441	599	0.416	-1.265	4.11468e-05	0.000498666	down
Nlug013596	214	527	2.46	1.299	0.00908629	0.0403154	up
Nlug013600	1266	3320	2.621	1.39	4.13972e-05	0.000500538	up
Nlug013601	3540	12753	3.602	1.849	1.9851e-05	0.000265891	up
Nlug013605	157	767	4.883	2.288	6.38006e-09	1.86379e-07	up
Nlug013612	171	403	2.357	1.237	0.000134189	0.00138141	up
Nlug013663	14156	36325	2.566	1.359	3.89133e-06	6.42049e-05	up
Nlug013667	40	228	5.608	2.488	4.26232e-09	1.2837e-07	up
Nlug013676	18076	37122	2.054	1.038	0.000250729	0.00232716	up
Nlug013678	39	122	3.127	1.645	0.000119023	0.00124743	up
Nlug013732	122	35	0.293	-1.772	2.70534e-05	0.000348739	down
Nlug013733	53	133	2.519	1.333	0.000497172	0.00410803	up
Nlug013739	113	33	0.295	-1.763	0.000175463	0.00173447	down
Nlug013756	99	226	2.269	1.182	0.000869527	0.00650504	up
Nlug013763	32	72	2.221	1.151	0.00750235	0.0347859	up
Nlug013781	6371	12840	2.015	1.011	0.00072218	0.00563142	up
Nlug013793	708	236	0.333	-1.586	0.00503527	0.0256815	down
Nlug013830	618	250	0.405	-1.305	0.000145613	0.00147573	down
Nlug013839	134	50	0.375	-1.417	0.000123267	0.00128332	down
Nlug013851	52	105	2.037	1.027	0.0025127	0.0149597	up
Nlug013885	171	359	2.105	1.074	0.000287986	0.00260803	up
Nlug013886	76	154	2.011	1.008	0.00273744	0.0159936	up
Nlug013888	291	681	2.341	1.227	9.31409e-05	0.00101067	up
Nlug013891	43	101	2.332	1.221	0.00106709	0.00759388	up
Nlug013899	69	219	3.183	1.67	2.14858e-07	4.81984e-06	up
Nlug013911	754	1937	2.569	1.361	8.96135e-06	0.000134146	up
Nlug013917	1558	475	0.305	-1.714	3.40592e-08	8.8441e-07	down
Nlug013923	115	4	0.04	-4.629	4.33861e-09	1.30142e-07	down
Nlug013939	251	49	0.196	-2.35	9.72463e-08	2.35709e-06	down
Nlug013956	44	128	2.919	1.545	0.000190401	0.00186098	up
Nlug014028	266	13	0.05	-4.314	4.93289e-10	1.70506e-08	down
Nlug014051	395	89	0.226	-2.147	1.67379e-06	3.07608e-05	down
Nlug014057	33	102	3.077	1.622	0.00043503	0.00368399	up
Nlug014059	26	122	4.57	2.192	4.18567e-09	1.26887e-07	up
Nlug014060	34	79	2.318	1.213	0.00892398	0.0397869	up
Nlug014062	169	404	2.387	1.255	0.00414795	0.0221064	up
Nlug014072	49	141	2.855	1.514	0.00736185	0.034348	up
Nlug014089	636	14	0.022	-5.5	8.57785e-17	7.14425e-15	down
Nlug014096	5436	23634	4.347	2.12	8.72475e-07	1.70552e-05	up
Nlug014105	78	419	5.357	2.422	1.76001e-06	3.2152e-05	up
Nlug014108	243	499	2.056	1.04	0.000744616	0.00575763	up
Nlug014116	103	267	2.603	1.38	9.73579e-06	0.000143273	up
Nlug014118	32	71	2.212	1.146	0.00535543	0.0268767	up
Nlug014119	91	278	3.049	1.608	2.47365e-06	4.32605e-05	up
Nlug014130	119	266	2.234	1.159	0.00125588	0.00864	up
Nlug014134	428	866	2.025	1.018	0.000455083	0.00381257	up
Nlug014147	220	604	2.738	1.453	3.79103e-06	6.28813e-05	up
Nlug014153	91	198	2.185	1.128	0.00267154	0.01569	up
Nlug014159	73	178	2.443	1.289	0.000303445	0.0027191	up
Nlug014161	363	167	0.461	-1.118	0.000151164	0.00152214	down
Nlug014162	90	37	0.407	-1.296	0.00255001	0.0151357	down
Nlug014173	7632	29526	3.868	1.952	1.36034e-08	3.79758e-07	up
Nlug014198	142	369	2.6	1.378	1.14897e-05	0.000163444	up
Nlug014209	88	265	2.987	1.579	4.15891e-05	0.000502017	up
Nlug014221	21	52	2.499	1.322	0.00843981	0.0381057	up
Nlug014226	27	72	2.646	1.404	0.00473123	0.0244494	up
Nlug014237	141	284	2.004	1.003	0.00370095	0.020262	up
Nlug014256	617	1274	2.064	1.045	0.00384232	0.0208249	up
Nlug014259	59	208	3.524	1.817	3.6999e-07	7.87133e-06	up
Nlug014261	244	94	0.386	-1.375	0.00299953	0.0171725	down
Nlug014269	469	150	0.32	-1.643	0.000146859	0.00148631	down
Nlug014278	1297	357	0.275	-1.861	0.000554938	0.00452092	down
Nlug014303	26	94	3.679	1.879	2.58297e-05	0.00033508	up
Nlug014311	1155	2712	2.348	1.231	0.00022064	0.00209552	up
Nlug014312	250	599	2.394	1.26	1.33697e-05	0.000186414	up
Nlug014313	63	209	3.312	1.728	1.28143e-07	3.01724e-06	up
Nlug014334	526	1356	2.576	1.365	8.59313e-06	0.000129128	up
Nlug014345	77	159	2.068	1.048	0.000984924	0.00713319	up
Nlug014359	63	194	3.082	1.624	4.92572e-06	7.84608e-05	up
Nlug014392	153	310	2.018	1.013	0.00292733	0.0168763	up
Nlug014412	9968	572	0.057	-4.122	3.3959e-23	5.26465e-21	down
Nlug014414	90	2	0.024	-5.359	7.6186e-10	2.51671e-08	down
Nlug014417	737	9	0.012	-6.386	1.32887e-44	1.09513e-41	down
Nlug014441	35	115	3.247	1.699	6.96862e-06	0.000106662	up
Nlug014454	164	397	2.418	1.274	0.000188357	0.00184346	up
Nlug014468	57	176	3.067	1.617	0.00142695	0.00954023	up
Nlug014489	640	2768	4.326	2.113	2.02118e-06	3.63766e-05	up
Nlug014520	47	131	2.777	1.473	4.05805e-05	0.000492948	up
Nlug014523	293	119	0.405	-1.303	0.00636979	0.0307739	down
Nlug014524	8652	1868	0.216	-2.211	2.76306e-08	7.27127e-07	down
Nlug014535	74	268	3.626	1.858	2.07062e-05	0.000276401	up
Nlug014541	1542	438	0.284	-1.817	0.000224597	0.00212363	down
Nlug014542	2328	801	0.344	-1.539	9.57376e-05	0.00103455	down
Nlug014544	237	61	0.256	-1.965	0.00282464	0.0163911	down
Nlug014546	183	570	3.108	1.636	4.05594e-06	6.64309e-05	up
Nlug014551	117	280	2.388	1.256	3.06009e-05	0.000388604	up
Nlug014577	30	76	2.555	1.353	0.00749496	0.0347619	up
Nlug014579	52	114	2.168	1.116	0.00142614	0.00953886	up
Nlug014641	321	115	0.359	-1.477	1.59373e-06	2.94813e-05	down
Nlug014643	40	155	3.853	1.946	1.25649e-07	2.96298e-06	up
Nlug014649	326	25	0.078	-3.673	3.95998e-05	0.000483662	down
Nlug014665	22	79	3.621	1.856	0.011227	0.0472305	up
Nlug014672	270	3827	14.152	3.823	3.34264e-13	1.7742e-11	up
Nlug014673	9197	21057	2.29	1.195	1.37689e-05	0.000191639	up
Nlug014683	134	294	2.194	1.134	0.000612132	0.0049027	up
Nlug014687	47	98	2.086	1.061	0.00258782	0.0153253	up
Nlug014695	2	53	21.193	4.405	0.000709981	0.00554973	up
Nlug014699	550	219	0.399	-1.326	3.3194e-05	0.000416468	down
Nlug014718	87	337	3.857	1.947	0.000137127	0.00140326	up
Nlug014754	288	640	2.22	1.151	0.000151997	0.00152856	up
Nlug014762	168	374	2.223	1.152	0.00154685	0.0101384	up
Nlug014767	55	118	2.146	1.102	0.00145995	0.00973591	up
Nlug014790	227	585	2.576	1.365	1.16599e-06	2.21566e-05	up
Nlug014813	3695	10080	2.728	1.448	0.00178633	0.0113378	up
Nlug014815	86	183	2.119	1.084	0.00237087	0.0143274	up
Nlug014840	75	326	4.307	2.107	2.35204e-10	8.48575e-09	up
Nlug014842	235	708	3.01	1.59	2.0639e-05	0.000275739	up
Nlug014843	393	45	0.115	-3.117	2.08679e-17	1.84604e-15	down
Nlug014869	1836	592	0.323	-1.632	0.000898097	0.00666149	down
Nlug014874	706	280	0.397	-1.334	0.00691418	0.032773	down
Nlug014899	467	190	0.406	-1.302	0.0018618	0.0117265	down
Nlug014900	311	149	0.478	-1.065	0.00796016	0.0364126	down
Nlug014920	78	214	2.74	1.454	5.4209e-05	0.000633436	up
Nlug014952	1648	43	0.026	-5.249	5.35364e-13	2.78496e-11	down
Nlug014953	146	697	4.759	2.251	2.40577e-12	1.14497e-10	up
Nlug014993	2540	5	0.002	-8.989	2.71317e-54	5.31036e-51	down
Nlug014999	96	16	0.163	-2.615	3.50672e-07	7.49112e-06	down
Nlug015000	463	125	0.269	-1.893	6.73536e-10	2.23911e-08	down
Nlug015024	16048	664	0.041	-4.594	1.65175e-06	3.03914e-05	down
Nlug015025	238	597	2.507	1.326	3.81546e-06	6.32196e-05	up
Nlug015081	267	121	0.453	-1.142	0.000408171	0.00349052	down
Nlug015093	123	386	3.125	1.644	7.14468e-07	1.41609e-05	up
Nlug015097	127	52	0.408	-1.292	0.00751071	0.0348143	down
Nlug015101	1615	3778	2.339	1.226	0.00010626	0.00113339	up
Nlug015103	70	145	2.053	1.038	0.00381072	0.0206679	up
Nlug015110	39	93	2.389	1.256	0.00030911	0.00276258	up
Nlug015154	109	314	2.873	1.522	3.31698e-07	7.12446e-06	up
Nlug015161	70	26	0.362	-1.467	0.00591356	0.0290995	down
Nlug015174	50	274	5.468	2.451	2.95125e-13	1.588e-11	up
Nlug015185	197	835	4.244	2.085	0.0007436	0.00575261	up
Nlug015189	1864	3832	2.056	1.04	0.00282223	0.016385	up
Nlug015193	481	204	0.424	-1.239	0.00754291	0.0348912	down
Nlug015196	275	125	0.456	-1.132	0.000404404	0.00346398	down
Nlug015239	579	1342	2.318	1.213	3.6741e-05	0.000455134	up
Nlug015250	69	149	2.148	1.103	0.00123806	0.00855874	up
Nlug015259	121	287	2.37	1.245	2.10506e-05	0.000279918	up
Nlug015268	2753	195	0.071	-3.818	1.94013e-12	9.31857e-11	down
Nlug015279	484	239	0.495	-1.015	0.000886837	0.00660203	down
Nlug015300	52	106	2.053	1.038	0.00308399	0.017565	up
Nlug015312	5047	12153	2.408	1.268	3.72383e-05	0.000458452	up
Nlug015315	689	1417	2.057	1.04	0.0039235	0.0212061	up
Nlug015317	4218	12030	2.852	1.512	9.72876e-07	1.88531e-05	up
Nlug015320	125	465	3.706	1.89	3.728e-07	7.90962e-06	up
Nlug015327	91	348	3.806	1.928	0.00248222	0.0148321	up
Nlug015340	1440	202	0.141	-2.829	7.98972e-14	4.70312e-12	down
Nlug015356	109	276	2.532	1.34	0.000110274	0.00117221	up
Nlug015365	440	951	2.159	1.111	0.000240096	0.00224041	up
Nlug015369	20	49	2.456	1.296	0.0120817	0.0499275	up
Nlug015381	157	461	2.922	1.547	0.000281975	0.00256678	up
Nlug015388	35	263	7.522	2.911	7.89731e-07	1.55542e-05	up
Nlug015396	116	42	0.368	-1.442	0.000194693	0.00189231	down
Nlug015430	69	143	2.065	1.046	0.00192976	0.012101	up
Nlug015436	63	215	3.416	1.772	7.78587e-08	1.92897e-06	up
Nlug015438	39	84	2.156	1.109	0.00681049	0.0324524	up
Nlug015441	1332	3291	2.471	1.305	0.000745448	0.00575838	up
Nlug015449	185	32	0.175	-2.511	2.99203e-09	9.24046e-08	down
Nlug015450	2127	494	0.232	-2.105	0.000296998	0.00267513	down
Nlug015453	145	31	0.212	-2.24	1.28731e-07	3.02654e-06	down
Nlug015472	5778	2439	0.422	-1.244	0.000241355	0.00224814	down
Nlug015482	513	236	0.46	-1.12	0.00110125	0.00779186	down
Nlug015527	47	100	2.151	1.105	0.000954603	0.00696838	up
Nlug015529	614	1702	2.771	1.47	0.000192321	0.0018739	up
Nlug015548	52	143	2.708	1.437	9.04893e-05	0.000985314	up
Nlug015570	311	655	2.107	1.075	0.000352318	0.00309921	up
Nlug015601	100	263	2.619	1.389	2.23302e-05	0.00029531	up
Nlug015612	999	4345	4.347	2.12	9.92452e-09	2.84092e-07	up
Nlug015629	784	2206	2.814	1.493	1.05239e-05	0.00015286	up
Nlug015656	377	117	0.311	-1.685	0.00163035	0.0105706	down
Nlug015667	100	254	2.525	1.336	0.00015543	0.00155808	up
Nlug015684	326	0	0	-11.347	6.51134e-27	1.45649e-24	down
Nlug015685	84	0	0.001	-9.398	1.64165e-12	7.9582e-11	down
Nlug015686	638	0	0	-12.318	8.89243e-30	2.48639e-27	down
Nlug015688	193	0	0.001	-10.592	3.89939e-14	2.39438e-12	down
Nlug015689	233	0	0.001	-10.863	6.4523e-25	1.16127e-22	down
Nlug015694	292	132	0.453	-1.142	0.00290237	0.016751	down
Nlug015697	495	222	0.449	-1.156	0.00117855	0.00826407	down
Nlug015740	362	1110	3.061	1.614	2.76979e-08	7.27673e-07	up
Nlug015742	85	235	2.749	1.459	5.49818e-06	8.66101e-05	up
Nlug015755	260	120	0.463	-1.111	0.000923615	0.00678011	down
Nlug015781	181	418	2.31	1.208	5.56815e-05	0.000649189	up
Nlug015788	98	198	2.029	1.021	0.00147753	0.00982804	up
Nlug015798	2936	8845	3.013	1.591	9.85634e-05	0.00106362	up
Nlug015801	762	1887	2.476	1.308	0.00464288	0.0240759	up
Nlug015802	1168	2413	2.066	1.047	0.00321658	0.018147	up
Nlug015831	281	1519	5.406	2.435	5.74074e-14	3.41782e-12	up
Nlug015858	197	468	2.38	1.251	1.28576e-05	0.000180398	up
Nlug015862	105	383	3.654	1.869	3.60225e-09	1.10164e-07	up
Nlug015865	150	348	2.317	1.212	0.000248751	0.00231291	up
Nlug015902	97	46	0.476	-1.072	0.00453759	0.0236517	down
Nlug015915	249	88	0.354	-1.497	4.50722e-05	0.000538734	down
Nlug015920	42	107	2.558	1.355	0.000345375	0.00304887	up
Nlug015923	378	48	0.126	-2.985	6.69914e-17	5.67001e-15	down
Nlug015929	108	287	2.632	1.396	0.000191196	0.00186667	up
Nlug015933	139	326	2.345	1.23	2.98011e-05	0.000379679	up
Nlug015960	1417	2964	2.091	1.065	0.00182101	0.0115112	up
Nlug015961	75	170	2.276	1.187	0.00130097	0.00888578	up
Nlug015962	311	726	2.333	1.222	3.22029e-05	0.000407297	up
Nlug015964	623	1538	2.469	1.304	3.78595e-05	0.000464944	up
Nlug015967	33	126	3.78	1.918	0.000907752	0.00671085	up
Nlug016002	656	1360	2.073	1.052	0.00297586	0.0171006	up
Nlug016009	58	167	2.878	1.525	3.64315e-05	0.000452375	up
Nlug016055	191	66	0.344	-1.539	0.000421232	0.00358265	down
Nlug016060	632	195	0.309	-1.696	1.02936e-05	0.000149932	down
Nlug016072	993	358	0.36	-1.473	0.00127545	0.00875568	down
Nlug016079	195	520	2.665	1.414	3.34132e-06	5.61959e-05	up
Nlug016082	195	410	2.102	1.072	0.00137149	0.00926438	up
Nlug016163	574	266	0.464	-1.109	0.000388723	0.00336028	down
Nlug016170	208	67	0.325	-1.623	2.89773e-06	4.94256e-05	down
Nlug016196	198	29	0.149	-2.751	4.03407e-08	1.0338e-06	down
Nlug016200	84	167	2.011	1.008	0.00496949	0.025404	up
Nlug016207	9607	28	0.003	-8.394	4.14054e-23	6.2339e-21	down
Nlug016211	2595	22	0.009	-6.877	3.39023e-32	1.15401e-29	down
Nlug016213	33	105	3.155	1.658	0.000182071	0.00179074	up
Nlug016219	34	91	2.67	1.417	6.44023e-05	0.000734994	up
Nlug016227	6649	16002	2.407	1.267	9.2915e-06	0.000138346	up
Nlug016229	28	68	2.441	1.288	0.00405446	0.0217021	up
Nlug016231	357	5	0.015	-6.051	0.00390691	0.021131	down
Nlug016236	129	15	0.12	-3.062	4.30296e-06	6.97472e-05	down
Nlug016238	360	5	0.016	-5.982	5.6738e-15	3.82143e-13	down
Nlug016242	487	213	0.437	-1.193	0.00661724	0.031715	down
Nlug016244	405	972	2.4	1.263	5.1315e-05	0.000604127	up
Nlug016250	672	167	0.249	-2.004	2.88335e-09	8.9401e-08	down
Nlug016251	44	92	2.073	1.052	0.00588357	0.0289792	up
Nlug016290	26	81	3.081	1.624	0.000151691	0.00152647	up
Nlug016297	38	99	2.59	1.373	0.00035944	0.0031442	up
Nlug016301	53	171	3.185	1.671	2.82765e-07	6.1837e-06	up
Nlug016308	14	96	7.008	2.809	4.59961e-08	1.17489e-06	up
Nlug016347	303	697	2.296	1.199	5.23221e-05	0.000614598	up
Nlug016360	521	1181	2.267	1.181	0.00416858	0.0221937	up
Nlug016388	121	26	0.217	-2.207	0.000929871	0.00681963	down
Nlug016389	356	113	0.318	-1.652	0.000158365	0.00158244	down
Nlug016390	3966	92	0.023	-5.435	4.47451e-16	3.5031e-14	down
Nlug016397	1088	5	0.005	-7.579	4.94406e-26	9.92488e-24	down
Nlug016402	91	1	0.009	-6.787	1.2961e-13	7.37978e-12	down
Nlug016408	73	195	2.663	1.413	0.000307105	0.00274623	up
Nlug016483	101	222	2.201	1.138	0.000559195	0.0045485	up
Nlug016504	162	337	2.078	1.055	0.000661565	0.00523171	up
Nlug016516	153	363	2.366	1.242	0.00239505	0.0144348	up
Nlug016533	141	368	2.619	1.389	3.26773e-05	0.000411634	up
Nlug016548	92	291	3.161	1.66	9.952e-06	0.00014618	up
Nlug016567	50	3	0.058	-4.106	0.000354714	0.00311329	down
Nlug016568	177	14	0.079	-3.659	3.59939e-12	1.65276e-10	down
Nlug016586	225	2160	9.587	3.261	2.43472e-12	1.15524e-10	up
Nlug016595	31	74	2.387	1.255	0.00618308	0.0301041	up
Nlug016599	142	399	2.812	1.492	2.51286e-06	4.36697e-05	up
Nlug016612	1016	2289	2.252	1.171	0.000524515	0.00430669	up
Nlug016636	10793	26781	2.481	1.311	3.90738e-05	0.000477983	up
Nlug016650	9095	44	0.005	-7.692	2.45734e-59	7.6954e-56	down
Nlug016651	839	2	0.003	-8.567	6.4387e-50	8.40143e-47	down
Nlug016657	101	6	0.063	-3.986	9.47432e-06	0.000140615	down
Nlug016668	62	7	0.109	-3.2	0.00153826	0.010116	down
Nlug016687	1245	197	0.158	-2.66	8.92374e-12	3.98085e-10	down
Nlug016688	174	374	2.151	1.105	0.0040145	0.0215788	up
Nlug016689	153	54	0.353	-1.504	3.72715e-05	0.000458452	down
Nlug016690	531	20	0.038	-4.706	3.87023e-18	3.7178e-16	down
Nlug016727	118	373	3.16	1.66	5.63769e-07	1.14198e-05	up
Nlug016745	350	132	0.376	-1.411	9.97081e-06	0.000146319	down
Nlug016747	209	428	2.048	1.034	0.000399008	0.00342713	up
Nlug016748	60	178	2.976	1.574	6.93803e-05	0.000786076	up
Nlug016749	720	307	0.426	-1.23	0.000439534	0.00370809	down
Nlug016751	92	332	3.6	1.848	1.02172e-08	2.91403e-07	up
Nlug016771	25249	72441	2.869	1.521	6.37628e-10	2.13333e-08	up
Nlug016782	139	337	2.428	1.28	0.000136093	0.0013946	up
Nlug016783	3589	208	0.058	-4.106	2.13626e-12	1.0198e-10	down
Nlug016815	49	148	3.03	1.599	2.5358e-06	4.39661e-05	up
Nlug016816	3712	7879	2.123	1.086	0.00417682	0.0222149	up
Nlug016817	177	506	2.843	1.507	1.07906e-05	0.000155382	up
Nlug016823	20	62	3.089	1.627	0.00221104	0.0135271	up
Nlug016829	64	131	2.044	1.031	0.00350414	0.0194334	up
Nlug016843	145	333	2.297	1.2	5.4769e-05	0.000639026	up
Nlug016844	1016	3957	3.895	1.962	3.24012e-07	6.97851e-06	up
Nlug016860	150	308	2.058	1.041	0.00167288	0.0107739	up
Nlug016877	429	1198	2.793	1.482	6.36516e-05	0.00072855	up
Nlug016879	957	82	0.086	-3.542	6.04362e-16	4.61615e-14	down
Nlug016891	2639	931	0.353	-1.503	3.28006e-06	5.52844e-05	down
Nlug016899	657	25	0.038	-4.707	6.80458e-15	4.51467e-13	down
Nlug016911	657	3341	5.085	2.346	1.1389e-10	4.28674e-09	up
Nlug016912	255	546	2.138	1.096	0.000100465	0.00108116	up
Nlug016922	544	212	0.39	-1.358	0.000274236	0.0025111	down
Nlug016926	248	52	0.208	-2.264	3.34436e-09	1.0288e-07	down
Nlug016927	469	1208	2.573	1.363	4.11551e-06	6.72658e-05	up
Nlug016962	123	345	2.816	1.494	0.000229672	0.00216248	up
Nlug016964	23	275	11.943	3.578	7.73177e-17	6.47401e-15	up
Nlug016968	130	299	2.31	1.208	0.000491107	0.00407081	up
Nlug016982	217	75	0.347	-1.528	0.000786644	0.00599964	down
Nlug016983	185	468	2.529	1.339	4.93442e-06	7.85194e-05	up
Nlug016985	292	644	2.2	1.138	7.86743e-05	0.000874916	up
Nlug017004	19	99	5.059	2.339	6.32064e-06	9.78981e-05	up
Nlug017016	209	898	4.286	2.1	1.66013e-09	5.30497e-08	up
Nlug017018	73	25	0.333	-1.584	0.00284933	0.0164874	down
Nlug017027	102	11	0.11	-3.181	7.94351e-05	0.000880874	down
Nlug017052	119	388	3.245	1.698	1.83265e-05	0.00024759	up
Nlug017060	28	84	3.016	1.593	0.000821448	0.00620465	up
Nlug017061	41	119	2.879	1.525	0.00408137	0.0218184	up
Nlug017067	4968	11517	2.318	1.213	0.00107456	0.00763752	up
Nlug017081	81	230	2.849	1.51	2.05806e-06	3.69554e-05	up
Nlug017102	187	1445	7.696	2.944	1.68598e-13	9.39467e-12	up
Nlug017114	243	74	0.304	-1.716	0.000309323	0.00276291	down
Nlug017119	131	308	2.347	1.231	0.000419758	0.00357205	up
Nlug017132	159	21	0.137	-2.873	1.65226e-10	6.05882e-09	down
Nlug017133	658	1564	2.376	1.249	0.00308653	0.0175669	up
Nlug017135	73	5	0.069	-3.867	4.84201e-05	0.000573931	down
Nlug017159	380	822	2.161	1.112	0.000281561	0.00256468	up
Nlug017170	991	423	0.427	-1.228	0.00916154	0.0405803	down
Nlug017176	683	124	0.182	-2.457	1.54568e-13	8.67465e-12	down
Nlug017226	312	153	0.49	-1.029	0.0019319	0.0121047	down
Nlug017230	320	0	0.001	-9.401	2.60691e-12	1.22949e-10	down
Nlug017242	1052	3714	3.529	1.819	2.10766e-05	0.000279918	up
Nlug017243	670	65	0.097	-3.363	3.96254e-07	8.32826e-06	down
Nlug017253	27	70	2.613	1.386	0.00457985	0.0238402	up
Nlug017269	4366	139	0.032	-4.976	1.0658e-35	4.51035e-33	down
Nlug017278	1679	3573	2.128	1.089	0.00228586	0.013889	up
Nlug017312	39	102	2.638	1.399	3.55419e-05	0.000442733	up
Nlug017328	103	220	2.119	1.084	0.000965271	0.00702007	up
Nlug017339	23	69	3.031	1.6	0.00551872	0.027598	up
Nlug017357	607	284	0.468	-1.096	0.000109367	0.00116416	down
Nlug017370	64	167	2.605	1.381	2.52695e-05	0.000328902	up
Nlug017371	30	74	2.433	1.283	0.0040199	0.0215856	up
Nlug017373	359	875	2.437	1.285	0.000118237	0.00124085	up
Nlug017386	5168	30	0.006	-7.444	1.50919e-16	1.23722e-14	down
Nlug017398	40	95	2.367	1.243	0.00573265	0.0283697	up
Nlug017415	991	360	0.363	-1.463	0.00307909	0.0175445	down
Nlug017417	187	531	2.849	1.51	6.33062e-07	1.26596e-05	up
Nlug017418	147	5	0.034	-4.88	1.51472e-14	9.64123e-13	down
Nlug017423	392	129	0.33	-1.601	7.927e-05	0.000880291	down
Nlug017427	188	26	0.141	-2.826	3.31307e-13	1.76449e-11	down
Nlug017435	293	104	0.353	-1.5	0.00279821	0.0162818	down
Nlug017453	914	431	0.471	-1.086	0.00159977	0.0104285	down
Nlug017474	53	206	3.9	1.964	6.32894e-08	1.58052e-06	up
Nlug017482	326	662	2.027	1.02	0.0056117	0.0279212	up
Nlug017483	2036	22	0.011	-6.552	1.30823e-32	4.55206e-30	down
Nlug017506	308	851	2.759	1.464	1.71525e-06	3.14121e-05	up
Nlug017563	38	104	2.73	1.449	0.00104647	0.00750598	up
Nlug017591	127	61	0.483	-1.049	0.00865038	0.0387729	down
Nlug017597	141	328	2.337	1.224	2.25434e-05	0.000297125	up
Nlug017598	400	108	0.271	-1.883	0.00476391	0.0245534	down
Nlug017600	307	16	0.051	-4.283	3.77907e-25	6.9615e-23	down
Nlug017610	26	123	4.636	2.213	1.60847e-08	4.43406e-07	up
Nlug017621	2456	764	0.311	-1.685	0.00048472	0.00402426	down
Nlug017645	52	0	0.002	-8.692	2.88283e-06	4.9225e-05	down
Nlug017651	754	261	0.346	-1.53	0.00301713	0.0172485	down
Nlug017653	59	160	2.733	1.45	4.45973e-05	0.00053428	up
Nlug017659	268	111	0.414	-1.271	0.00455726	0.0237384	down
Nlug017766	726	14	0.02	-5.66	1.39536e-08	3.88764e-07	down
Nlug017790	293	107	0.366	-1.449	7.51942e-06	0.000114381	down
Nlug017801	85	195	2.29	1.196	5.92974e-05	0.000683208	up
Nlug017802	480	1295	2.697	1.432	6.67338e-06	0.000102543	up
Nlug017814	253	563	2.224	1.153	0.00036195	0.00316262	up
Nlug017835	64	22	0.337	-1.569	0.0101424	0.0438578	down
Nlug017839	539	3	0.006	-7.371	7.5355e-19	7.61232e-17	down
Nlug017840	141	1	0.011	-6.54	5.24624e-09	1.55874e-07	down
Nlug017841	878	149	0.17	-2.554	7.52412e-06	0.000114381	down
Nlug017847	18	87	4.679	2.226	1.07465e-05	0.000154943	up
Nlug017850	418	1948	4.653	2.218	3.86562e-06	6.38935e-05	up
Nlug017870	37	92	2.46	1.299	0.00121716	0.00846904	up
Nlug017871	252	560	2.225	1.154	0.000220687	0.00209552	up
Nlug017875	1093	3942	3.607	1.851	1.06197e-07	2.54243e-06	up
Nlug017881	41	110	2.653	1.407	0.000173336	0.00171561	up
Nlug017888	247	540	2.189	1.13	0.000354563	0.00311329	up
Nlug017910	197	2	0.011	-6.473	4.47238e-23	6.66939e-21	down
Nlug017911	12439	19	0.002	-9.334	1.07915e-46	1.12649e-43	down
Nlug017916	422	185	0.439	-1.189	8.30787e-05	0.000915444	down
Nlug017930	847	28	0.033	-4.939	1.83385e-40	9.90153e-38	down
Nlug017966	28	78	2.807	1.489	0.00108226	0.00768178	up
Nlug017971	108	288	2.673	1.418	0.00289633	0.0167223	up
Nlug017986	38	142	3.689	1.883	2.58939e-06	4.47514e-05	up
Nlug018003	445	1987	4.466	2.159	0.00044764	0.00376229	up
Nlug018004	680	1900	2.793	1.482	0.000209019	0.00200541	up
Nlug018007	485	1242	2.561	1.357	1.07968e-05	0.000155382	up
Nlug018008	68	137	2.015	1.011	0.00327542	0.0184285	up
Nlug018035	17	71	4.213	2.075	0.000314225	0.00280509	up
Nlug018106	970	234	0.241	-2.054	2.34424e-07	5.19918e-06	down
Nlug018140	554	2017	3.639	1.863	9.33531e-06	0.000138815	up
Nlug018169	346	129	0.374	-1.42	0.00239277	0.0144322	down
Nlug018196	63	143	2.267	1.181	0.000519175	0.00426732	up
Nlug018204	1203	541	0.45	-1.153	0.000271702	0.00249081	down
Nlug018207	843	240	0.285	-1.81	0.00365266	0.0200995	down
Nlug018209	231	507	2.192	1.132	0.00104722	0.00750759	up
Nlug018213	24	62	2.516	1.331	0.00753676	0.0348731	up
Nlug018231	1134	414	0.365	-1.453	0.00957769	0.0419959	down
Nlug018248	169	348	2.061	1.043	0.00104242	0.00748385	up
Nlug018277	627	1789	2.853	1.513	3.02898e-07	6.56894e-06	up
Nlug018314	47	164	3.448	1.786	1.581e-06	2.92961e-05	up
Nlug018318	82	168	2.036	1.026	0.00508017	0.0258684	up
Nlug018325	120	323	2.683	1.424	6.24497e-05	0.000716364	up
Nlug018337	614	287	0.468	-1.096	0.000233745	0.00219029	down
Nlug018399	564	1234	2.188	1.13	0.00123779	0.00855874	up
Nlug018400	154	523	3.387	1.76	5.82129e-07	1.17159e-05	up
Nlug018406	47	163	3.469	1.794	1.5437e-07	3.56499e-06	up
Nlug018425	1299	2855	2.198	1.136	0.00449582	0.0234808	up
Nlug018439	195	54	0.275	-1.864	1.45905e-05	0.000201462	down
Nlug018453	317	638	2.011	1.008	0.000289623	0.00262134	up
Nlug018460	1225	3302	2.694	1.43	0.000294363	0.0026581	up
Nlug018462	243	0	0.001	-10.925	4.68007e-15	3.21406e-13	down
Nlug018490	7944	111	0.014	-6.16	9.17663e-29	2.35554e-26	down
Nlug018504	890	221	0.249	-2.008	5.90676e-06	9.24881e-05	down
Nlug018523	135	334	2.465	1.302	3.42283e-05	0.000427731	up
Nlug018529	184	83	0.451	-1.149	0.00263433	0.0155303	down
Nlug018534	77	168	2.163	1.113	0.000957175	0.00697739	up
Nlug018542	57	9	0.161	-2.638	0.00114038	0.00803607	down
Nlug018551	1295	556	0.43	-1.219	0.000153773	0.00154345	down
Nlug018559	160	77	0.481	-1.055	0.002983	0.0171154	down
Nlug018575	405	121	0.298	-1.744	2.48037e-06	4.32605e-05	down
Nlug018597	388	1030	2.654	1.408	5.72611e-06	9.00195e-05	up
Nlug018598	220	892	4.059	2.021	3.15623e-11	1.30741e-09	up
Nlug018619	25	222	8.859	3.147	9.99183e-18	9.14925e-16	up
Nlug018628	4030	168	0.042	-4.579	1.12551e-14	7.31254e-13	down
Nlug018629	2776	1363	0.491	-1.026	0.00834119	0.0377475	down
Nlug018666	583	97	0.167	-2.578	2.91159e-12	1.35376e-10	down
Nlug018739	122	36	0.297	-1.75	0.000375817	0.00326194	down
Nlug018773	362	120	0.332	-1.593	0.0109515	0.0464083	down
Nlug018782	571	1172	2.054	1.038	0.000718628	0.00560652	up
Nlug018792	322	1	0.004	-8.103	2.00131e-06	3.60604e-05	down
Nlug018889	128	1263	9.866	3.302	2.88268e-09	8.9401e-08	up
Nlug018916	1426	45	0.032	-4.965	1.08157e-06	2.07539e-05	down
Nlug018923	201	547	2.725	1.446	0.000228837	0.0021564	up
Nlug018936	103	211	2.054	1.038	0.00153969	0.0101168	up
Nlug018943	62	141	2.282	1.19	0.000286935	0.00260303	up
Nlug018973	128	54	0.416	-1.267	0.000123101	0.00128244	down
Nlug018995	244	6	0.025	-5.332	2.75343e-12	1.2918e-10	down
Nlug018998	285	104	0.365	-1.455	0.0025975	0.0153768	down
Nlug019001	305	742	2.43	1.281	0.000388771	0.00336028	up
Nlug019010	22	260	11.988	3.584	5.76648e-07	1.16355e-05	up
Nlug019014	209	49	0.236	-2.084	1.07138e-05	0.000154943	down
Nlug019016	105	229	2.174	1.12	0.00176626	0.0112377	up
Nlug019061	237	481	2.036	1.026	0.000389111	0.00336056	up
Nlug019070	1091	17	0.016	-5.989	2.93136e-07	6.3749e-06	down
Nlug019071	115	42	0.367	-1.445	4.08247e-05	0.00049553	down
Nlug019079	91	15	0.162	-2.624	0.000232045	0.00217827	down
Nlug019099	126	50	0.4	-1.324	0.000121853	0.00127198	down
Nlug019100	92	41	0.445	-1.168	0.00599759	0.0294511	down
Nlug019104	927	18	0.02	-5.64	3.79534e-23	5.81817e-21	down
Nlug019151	53	258	4.889	2.289	6.20966e-07	1.24495e-05	up
Nlug019168	590	210	0.357	-1.485	0.00173004	0.0110567	down
Nlug019172	148	481	3.255	1.703	6.65565e-08	1.65682e-06	up
Nlug019178	73	0	0.002	-9.177	5.314e-11	2.12262e-09	down
Nlug019186	3245	8318	2.563	1.358	8.78063e-05	0.000960106	up
Nlug019219	70	172	2.463	1.301	7.48822e-05	0.000839054	up
Nlug019233	2586	88	0.034	-4.871	2.43937e-25	4.54711e-23	down
Nlug019244	70	32	0.451	-1.15	0.0113926	0.0478371	down
Nlug019250	629	1634	2.6	1.378	2.35421e-05	0.000308988	up
Nlug019261	206	7	0.038	-4.732	6.40734e-21	8.09082e-19	down
Nlug019263	63649	17796	0.28	-1.839	5.88758e-09	1.73939e-07	down
Nlug019264	434	6	0.014	-6.173	3.11202e-12	1.43741e-10	down
Nlug019280	108	40	0.379	-1.398	0.00981368	0.0427791	down
Nlug019307	73	25	0.339	-1.562	0.00464359	0.0240759	down
Nlug019310	3681	265	0.072	-3.797	6.69848e-05	0.000761691	down
Nlug019312	138	3	0.024	-5.409	6.97116e-09	2.02889e-07	down
Nlug019316	222	473	2.13	1.091	0.00135356	0.00915512	up
Nlug019332	203	738	3.624	1.858	9.45822e-08	2.29964e-06	up
Nlug019337	217	465	2.146	1.102	0.000193566	0.00188252	up
Nlug019357	108	22	0.207	-2.274	1.4199e-06	2.65569e-05	down
Nlug019369	6	79	12.668	3.663	1.21634e-05	0.000171736	up
Nlug019376	161	50	0.312	-1.682	1.28127e-05	0.00017993	down
Nlug019387	593	2698	4.549	2.186	6.34973e-09	1.8584e-07	up
Nlug019417	75	27	0.367	-1.447	0.00484047	0.0248686	down
Nlug019433	152	348	2.289	1.195	0.000481026	0.00400207	up
Nlug019441	27	95	3.481	1.8	0.000192594	0.00187539	up
Nlug019446	82	0	0.002	-9.351	2.50326e-08	6.63216e-07	down
Nlug019478	858	338	0.394	-1.344	0.00106122	0.00757096	down
Nlug019496	91	1	0.009	-6.789	4.41779e-07	9.14997e-06	down
Nlug019498	8	52	6.51	2.703	0.00284663	0.0164778	up
Nlug019499	88	8	0.092	-3.44	2.74975e-07	6.03019e-06	down
Nlug019516	109	276	2.512	1.329	0.000111785	0.00118425	up
Nlug019530	56	122	2.188	1.13	0.000775134	0.00593499	up
Nlug019544	728	2650	3.637	1.863	3.43266e-06	5.76702e-05	up
Nlug019558	324	75	0.231	-2.114	0.000279197	0.00254908	down
Nlug019577	300	29	0.095	-3.392	5.29488e-15	3.58906e-13	down
Nlug019591	116	269	2.315	1.211	0.000630824	0.00502669	up
Nlug019712	663	206	0.311	-1.685	3.59892e-06	5.99488e-05	down
Nlug019727	125	405	3.246	1.699	4.2786e-07	8.92067e-06	up
Nlug019760	72	32	0.45	-1.152	0.0115528	0.0482898	down
Nlug019793	149	51	0.346	-1.529	0.00134344	0.00911023	down
Nlug019827	125	262	2.095	1.067	0.000414004	0.00353076	up
Nlug019836	3008	6721	2.234	1.16	0.00518382	0.026268	up
Nlug019848	1428	300	0.21	-2.252	1.07488e-07	2.56562e-06	down
Nlug019849	341	131	0.386	-1.373	0.0115138	0.0481784	down
Nlug019873	42	97	2.309	1.207	0.00377312	0.0205321	up
Nlug019879	25	73	2.968	1.57	0.000673558	0.00530245	up
Nlug019886	59	168	2.852	1.512	4.27168e-06	6.93838e-05	up
Nlug019953	86	184	2.138	1.097	0.00150072	0.00995265	up
Nlug020010	495	208	0.421	-1.249	2.20257e-05	0.000292023	down
Nlug020011	119	24	0.197	-2.342	9.48695e-07	1.84073e-05	down
Nlug020020	746	1810	2.427	1.279	0.00699824	0.0331053	up
Nlug020021	301	882	2.927	1.549	0.00010725	0.00114318	up
Nlug020129	2274	885	0.389	-1.361	0.0120779	0.049925	down
Nlug020130	316	5	0.017	-5.892	7.51272e-13	3.83173e-11	down
Nlug020132	58	0	0.008	-6.956	2.74319e-07	6.02424e-06	down
Nlug020143	409	145	0.355	-1.495	1.85546e-05	0.000250376	down
Nlug020153	96	31	0.325	-1.623	0.000110151	0.0011717	down
Nlug020155	191	52	0.273	-1.872	0.000206317	0.00198557	down
Nlug020193	22	94	4.402	2.138	9.46933e-06	0.000140615	up
Nlug020196	1	38	33.83	5.08	0.00115961	0.00814946	up
Nlug020203	654	2390	3.652	1.869	1.22718e-05	0.000173109	up
Nlug020223	66	158	2.368	1.244	7.43269e-05	0.000834915	up
Nlug020236	1095	270	0.247	-2.02	0.000295129	0.00266347	down
Nlug020279	61	174	2.853	1.513	0.000206726	0.00198828	up
Nlug020336	111	623	5.581	2.481	2.75553e-12	1.2918e-10	up
Nlug020399	190	507	2.665	1.414	5.95889e-05	0.000685558	up
Nlug020476	125	6	0.051	-4.301	3.16457e-10	1.12106e-08	down
Nlug020477	246	110	0.446	-1.164	0.000146941	0.00148631	down
Nlug020487	568	157	0.277	-1.854	0.0105717	0.0451654	down
Nlug020488	154	44	0.285	-1.812	0.0117539	0.0489238	down
Nlug020497	460	186	0.404	-1.308	0.00555233	0.0277139	down
Nlug020504	260	0	0.002	-9.104	9.57514e-11	3.6694e-09	down
Nlug020516	31	81	2.579	1.367	0.000989869	0.00715968	up
Nlug020545	86	16	0.188	-2.413	2.58854e-05	0.000335525	down
Nlug020549	27	68	2.54	1.345	0.00335909	0.0188248	up
Nlug020557	101	226	2.246	1.168	0.00139145	0.00937092	up
Nlug020578	180	67	0.375	-1.416	0.00451729	0.0235694	down
Nlug020588	169	65	0.385	-1.376	0.000129223	0.00133733	down
Nlug020595	48	148	3.095	1.63	2.26587e-05	0.000298394	up
Nlug020617	87	39	0.448	-1.158	0.00272574	0.015961	down
Nlug020642	801	236	0.296	-1.758	0.00267867	0.0157206	down
Nlug020644	363	4	0.011	-6.514	1.62191e-05	0.000221798	down
Nlug020691	215	0	0.001	-10.75	8.31897e-18	7.66226e-16	down
Nlug020705	74	179	2.4	1.263	0.00253486	0.0150572	up
Nlug020759	304	2322	7.64	2.934	9.39546e-14	5.44867e-12	up
Nlug020769	32	163	5.129	2.359	1.88586e-10	6.86716e-09	up
Nlug020803	113	314	2.767	1.468	4.57221e-05	0.000544424	up
Nlug020817	118	41	0.35	-1.513	0.001112	0.00786296	down
Nlug020853	101	35	0.348	-1.523	0.000173532	0.00171646	down
Nlug020863	308	1	0.004	-8.041	2.66026e-21	3.50037e-19	down
Nlug020875	55	0	0.009	-6.852	4.17092e-07	8.73105e-06	down
Nlug020882	375	49	0.131	-2.929	1.51132e-07	3.50064e-06	down
Nlug020981	124	279	2.255	1.173	0.000348093	0.00307036	up
Nlug020983	93	288	3.069	1.618	1.13239e-05	0.000161632	up
Nlug020986	133	286	2.149	1.104	0.000432819	0.00366924	up
Nlug020992	177	19	0.107	-3.229	4.78178e-14	2.8687e-12	down
Nlug021004	140	6	0.048	-4.373	3.12997e-12	1.44144e-10	down
Nlug021053	33	71	2.131	1.091	0.00640787	0.0309007	up
Nlug021054	173	354	2.043	1.031	0.000414441	0.00353256	up
Nlug021063	43	98	2.267	1.18	0.00336258	0.0188377	up
Nlug021085	130	60	0.464	-1.109	0.00193426	0.0121147	down
Nlug021086	278	102	0.368	-1.44	0.000912499	0.00672372	down
Nlug021091	42	150	3.559	1.832	8.37018e-07	1.64442e-05	up
Nlug021101	165	2	0.013	-6.216	2.80189e-08	7.33646e-07	down
Nlug021102	41	123	3.011	1.59	1.55827e-05	0.000214029	up
Nlug021121	315	141	0.447	-1.161	0.00937454	0.0412206	down
Nlug021142	18	101	5.781	2.531	9.90547e-07	1.91481e-05	up
Nlug021186	31	176	5.554	2.473	4.98363e-12	2.25531e-10	up
Nlug021198	378	825	2.181	1.125	7.64048e-05	0.000853923	up
Nlug021208	70	200	2.856	1.514	2.35634e-05	0.000309009	up
Nlug021210	86	0	0.001	-9.425	1.20244e-11	5.24452e-10	down
Nlug021218	193	8	0.042	-4.57	3.64137e-16	2.8667e-14	down
Nlug021219	82	4	0.052	-4.261	1.30567e-10	4.8446e-09	down
Nlug021231	103	508	4.927	2.301	2.31435e-07	5.15478e-06	up
Nlug021232	48	174	3.616	1.855	1.78085e-05	0.000241634	up
Nlug021315	133	63	0.478	-1.066	0.00619824	0.0301498	down
Nlug021362	308	137	0.444	-1.171	0.000628055	0.00501227	down
Nlug021379	1216	5	0.005	-7.74	8.48276e-26	1.66029e-23	down
Nlug021404	144	374	2.594	1.375	0.00217823	0.01337	up
Nlug021411	161	14	0.091	-3.451	2.44735e-11	1.03012e-09	down
Nlug021414	365	160	0.438	-1.19	0.000348254	0.00307036	down
Nlug021435	306	78	0.255	-1.97	1.10014e-06	2.10587e-05	down
Nlug021441	96	39	0.408	-1.293	0.00273425	0.0159889	down
Nlug021442	117	18	0.155	-2.686	4.53881e-07	9.3266e-06	down
Nlug021445	322	4	0.012	-6.349	1.1851e-19	1.27975e-17	down
Nlug021490	126	319	2.529	1.338	6.7812e-05	0.000770537	up
Nlug021512	314	1	0.005	-7.696	1.0201e-10	3.84887e-09	down
Nlug021558	147	419	2.846	1.509	0.00420056	0.0222655	up
Nlug021668	72	513	7.139	2.836	2.4497e-08	6.52338e-07	up
Nlug021694	54	203	3.755	1.909	2.1077e-05	0.000279918	up
Nlug021719	81	37	0.45	-1.152	0.00607212	0.029721	down
Nlug021737	426	5	0.013	-6.227	3.20277e-26	6.51285e-24	down
Nlug021746	31	74	2.357	1.237	0.00331171	0.0186117	up
Nlug021749	15	85	5.823	2.542	0.00623226	0.0302682	up
Nlug021757	63	227	3.605	1.85	6.4569e-08	1.60991e-06	up
Nlug021787	557	264	0.473	-1.079	0.00508187	0.0258686	down
Nlug021820	155	399	2.574	1.364	0.000274678	0.00251222	up
Nlug021826	141	38	0.267	-1.904	0.000858785	0.00643698	down
Nlug021841	334	695	2.081	1.057	0.00371035	0.0202987	up
Nlug021855	87	228	2.614	1.386	2.54071e-05	0.000330419	up
Nlug021868	324	139	0.428	-1.225	0.00494404	0.0252903	down
Nlug021875	257	4	0.018	-5.787	8.20674e-11	3.18072e-09	down
Nlug021882	176	2	0.015	-6.102	4.13369e-15	2.85134e-13	down
Nlug021888	1203	201	0.167	-2.582	0.00798807	0.0364687	down
Nlug021927	70	20	0.291	-1.781	0.0100572	0.0436706	down
Nlug021930	57	0	0.002	-8.84	2.28147e-06	4.03196e-05	down
Nlug021931	99	0	0.005	-7.705	5.34632e-08	1.35238e-06	down
Nlug021977	148	0	0.001	-10.205	1.26737e-13	7.2425e-12	down
Nlug021982	37	109	2.886	1.529	4.90876e-05	0.000580524	up
Nlug021986	39	128	3.283	1.715	5.00827e-05	0.000590953	up
Nlug022033	374	69	0.185	-2.432	0.0033229	0.0186621	down
Nlug022054	13688	30041	2.195	1.134	9.69106e-06	0.000142884	up
Nlug022069	82	175	2.139	1.097	0.00851591	0.0383829	up
Nlug022070	47	112	2.411	1.269	0.00267244	0.01569	up
Nlug022096	232	73	0.315	-1.665	6.56578e-06	0.000101388	down
Nlug022098	45	1	0.018	-5.782	1.27957e-05	0.000179852	down
Nlug022106	29	77	2.61	1.384	0.00206356	0.0127662	up
Nlug022136	821	396	0.482	-1.053	0.000752171	0.00579601	down
Nlug022153	11	51	4.747	2.247	0.00523574	0.0264285	up
Nlug022191	29	126	4.329	2.114	0.00931584	0.0410663	up
Nlug022201	214	22	0.105	-3.257	2.3532e-13	1.27939e-11	down
Nlug022220	289	95	0.328	-1.61	0.00369292	0.0202426	down
Nlug022244	149	11	0.073	-3.774	1.08628e-08	3.07576e-07	down
Nlug022246	245	80	0.326	-1.616	9.56481e-05	0.00103429	down
Nlug022285	21	60	2.878	1.525	0.0031068	0.017651	up
Nlug022290	120	7	0.062	-4.017	4.08201e-14	2.49673e-12	down
Nlug022304	48	126	2.612	1.385	3.40681e-05	0.00042641	up
Nlug022317	59	166	2.811	1.491	5.374e-06	8.47393e-05	up
Nlug022318	1015	429	0.423	-1.242	0.00218854	0.013412	down
Nlug022320	35	96	2.714	1.44	7.81496e-05	0.000870317	up
Nlug022328	3	43	15.735	3.976	0.00719403	0.0337561	up
Nlug022382	1382	3382	2.446	1.291	0.00037325	0.00324241	up
Nlug022384	400	83	0.207	-2.271	0.000409944	0.00350377	down
Nlug022476	322	753	2.334	1.223	0.000103862	0.0011116	up
Nlug022486	79	30	0.389	-1.364	0.00984	0.04287	down
Nlug022487	156	37	0.238	-2.074	0.000100007	0.00107697	down
Nlug022490	211	60	0.287	-1.803	3.41899e-05	0.000427592	down
Nlug022522	191	19	0.101	-3.311	3.76738e-13	1.99289e-11	down
Nlug022525	486	1286	2.644	1.403	3.57884e-05	0.000445095	up
Nlug022533	350	0	0.001	-9.531	7.7853e-31	2.34427e-28	down
Nlug022537	54	118	2.18	1.125	0.0014022	0.00942305	up
Nlug022547	78	35	0.455	-1.137	0.00868665	0.0388838	down
Nlug022561	167	368	2.201	1.138	0.000364384	0.00318033	up
Nlug022581	83	173	2.073	1.051	0.00748238	0.0347368	up
Nlug022582	68	8	0.119	-3.067	7.2382e-05	0.000815365	down
Nlug022587	144	56	0.389	-1.364	0.00146248	0.0097445	down
Nlug022594	55	121	2.199	1.137	0.00194699	0.0121798	up
Nlug022595	146	40	0.273	-1.871	1.65649e-07	3.78648e-06	down
Nlug022621	37	101	2.726	1.447	0.00132391	0.00900513	up
Nlug022649	1297	316	0.244	-2.036	0.000111902	0.00118469	down
Nlug022654	109	29	0.266	-1.912	0.000830045	0.00626354	down
Nlug022670	164	21	0.128	-2.968	5.10339e-10	1.75624e-08	down
Nlug022677	91	194	2.116	1.081	0.00129931	0.00888022	up
Nlug022687	107	0	0.004	-7.828	4.58017e-14	2.75832e-12	down
Nlug022697	65	310	4.762	2.251	4.98633e-13	2.61124e-11	up
Nlug022763	96	369	3.851	1.945	0.0029954	0.0171567	up
Nlug022788	645	2013	3.12	1.641	0.000118043	0.00123965	up
Nlug022813	45	0	0.003	-8.482	1.71008e-06	3.13909e-05	down
Nlug022815	3	41	14.837	3.891	0.0101994	0.0440438	up
Nlug022880	41	159	3.811	1.93	7.44394e-06	0.000113493	up
Nlug022898	81	18	0.218	-2.199	0.0011648	0.00817866	down
Nlug022903	256	51	0.2	-2.321	2.55361e-11	1.0691e-09	down
Nlug022904	236	117	0.499	-1.003	0.011648	0.0485842	down
Nlug022944	245	103	0.419	-1.256	0.006418	0.0309304	down
Nlug022986	77	23	0.301	-1.732	0.00981033	0.0427764	down
Nlug023038	90	40	0.442	-1.179	0.00223776	0.0136551	down
Nlug023074	553	185	0.335	-1.576	0.000158575	0.00158353	down
Nlug023082	119	990	8.325	3.057	8.50799e-13	4.30222e-11	up
Nlug023094	187	61	0.328	-1.609	0.00202005	0.0125503	down
Nlug023102	124	3	0.023	-5.415	1.34837e-10	4.9912e-09	down
Nlug023106	306	1	0.004	-8.031	2.42784e-25	4.54711e-23	down
Nlug023111	586	172	0.293	-1.769	0.000853351	0.00640545	down
Nlug023122	53	155	2.904	1.538	0.000542801	0.00443589	up
Nlug023130	32	143	4.476	2.162	2.48641e-10	8.92942e-09	up
Nlug023147	31	159	5.143	2.363	8.51761e-13	4.30222e-11	up
Nlug023156	163	34	0.207	-2.275	0.000172455	0.00170905	down
Nlug023160	241	98	0.408	-1.293	0.0104446	0.0447815	down
Nlug023174	95	35	0.368	-1.442	0.00159175	0.0103848	down
Nlug023175	161	43	0.265	-1.917	0.000110392	0.00117268	down
Nlug023178	158	4	0.025	-5.324	5.96322e-24	9.93321e-22	down
Nlug023181	56	144	2.578	1.367	6.20618e-05	0.000712959	up
Nlug023191	132	31	0.233	-2.102	0.000222756	0.00211005	down
Nlug023194	217	38	0.174	-2.519	9.72994e-06	0.000143273	down
Nlug023218	44	98	2.258	1.175	0.00133663	0.00907588	up
Nlug023242	40	99	2.505	1.325	0.000134475	0.00138254	up
Nlug023247	45	117	2.597	1.377	0.000127467	0.0013209	up
Nlug023291	84	30	0.354	-1.498	0.00314195	0.0177991	down
Nlug023297	130	29	0.225	-2.155	1.65763e-05	0.00022609	down
Nlug023321	20	55	2.733	1.45	0.00812186	0.036915	up
Nlug023328	23	59	2.573	1.363	0.0117799	0.0489773	up
Nlug023344	260	64	0.248	-2.014	4.18166e-07	8.74184e-06	down
Nlug023348	257	3	0.014	-6.154	2.39428e-25	4.54711e-23	down
Nlug023405	79	12	0.156	-2.679	8.56343e-05	0.000938979	down
Nlug023425	51	115	2.262	1.178	0.00214126	0.0131844	up
Nlug023431	115	46	0.402	-1.314	0.00153385	0.0101077	down
Nlug023465	104	28	0.272	-1.876	2.81252e-05	0.000361534	down
Nlug023525	252	7	0.028	-5.151	1.70182e-13	9.44932e-12	down
Nlug023567	61	176	2.909	1.54	1.98919e-05	0.000266212	up
Nlug023572	137	314	2.282	1.19	3.70414e-05	0.00045777	up
Nlug023573	46	114	2.489	1.315	0.000111344	0.00118118	up
Nlug023576	39	222	5.644	2.497	4.16156e-05	0.000502017	up
Nlug023581	472	216	0.457	-1.131	0.00013341	0.0013743	down
Nlug023605	74	17	0.237	-2.077	0.00448734	0.0234444	down
Nlug023609	103	35	0.343	-1.543	0.0113283	0.0476184	down
Nlug023632	22	80	3.638	1.863	0.000172719	0.00171058	up
Nlug023662	214	50	0.234	-2.092	1.43545e-06	2.67893e-05	down
Nlug023663	520	120	0.231	-2.114	1.02927e-06	1.98233e-05	down
Nlug023665	92	26	0.28	-1.838	0.000803587	0.00610508	down
Nlug023666	144	58	0.408	-1.293	0.00309515	0.0175912	down
Nlug023688	63	8	0.134	-2.903	0.000256484	0.00236654	down
Nlug023700	83	31	0.37	-1.435	0.00796508	0.0364244	down
Nlug023706	215	60	0.281	-1.829	7.06714e-05	0.000798393	down
Nlug023718	81	10	0.13	-2.947	5.42666e-07	1.10351e-05	down
Nlug023730	222	73	0.33	-1.598	0.000181562	0.00178798	down
Nlug023749	95	33	0.349	-1.519	0.00275631	0.0160798	down
Nlug023758	252	100	0.395	-1.342	0.000134438	0.00138254	down
Nlug023759	206	62	0.3	-1.737	6.32711e-06	9.78981e-05	down
Nlug023776	302	20	0.066	-3.919	4.5026e-16	3.50755e-14	down
Nlug023781	129	40	0.313	-1.675	0.000435709	0.00368634	down
Nlug023851	42	96	2.281	1.19	0.000759489	0.0058409	up
Nlug023881	85	222	2.607	1.382	7.7674e-05	0.000866253	up
Nlug023882	670	138	0.206	-2.277	8.23933e-05	0.000908531	down
Nlug023889	43	125	2.887	1.529	2.70608e-05	0.000348739	up
Nlug023905	44	209	4.759	2.251	1.47471e-07	3.43105e-06	up
Nlug023935	205	62	0.304	-1.716	0.000200054	0.00193361	down
Nlug023939	458	113	0.247	-2.018	4.66421e-06	7.49049e-05	down
Nlug024038	75	21	0.284	-1.817	0.00326681	0.0183933	down
Nlug024048	71	22	0.316	-1.66	0.0041278	0.0220215	down
Nlug024058	156	999	6.387	2.675	3.01659e-13	1.61759e-11	up
Nlug024123	55	9	0.173	-2.535	0.00178536	0.0113362	down
Nlug024263	126	261	2.068	1.048	0.00133373	0.00906402	up
Nlug024268	64	391	6.104	2.61	7.12502e-10	2.36363e-08	up
Nlug024306	64	6	0.105	-3.247	0.000233465	0.00219029	down
Nlug024318	177	49	0.279	-1.844	2.80807e-05	0.000361288	down
Nlug024332	153	362	2.367	1.243	0.00120979	0.00843032	up
Nlug024342	4180	8477	2.028	1.02	0.00212483	0.0130987	up
Nlug024371	73	23	0.312	-1.678	0.00153689	0.0101112	down
Nlug024419	36	205	5.681	2.506	2.19299e-06	3.89317e-05	up
Nlug024433	63	13	0.213	-2.233	0.00105325	0.00753047	down
Nlug024484	58	0	0.002	-8.872	2.86712e-05	0.000366776	down
Nlug024562	92	25	0.266	-1.909	0.00126537	0.00870146	down
Nlug024563	415	1158	2.788	1.479	1.26215e-06	2.38393e-05	up
Nlug024594	1620	3889	2.4	1.263	0.000292976	0.0026471	up
Nlug024608	290	77	0.266	-1.912	1.43445e-07	3.34734e-06	down
Nlug024665	92	188	2.029	1.02	0.0039584	0.0213579	up
Nlug024671	156	346	2.212	1.145	0.000225529	0.00213116	up
Nlug024673	852	28	0.033	-4.928	3.4381e-34	1.28176e-31	down
Nlug024695	245	524	2.137	1.095	0.00161743	0.0104991	up
Nlug024722	197	548	2.78	1.475	2.61949e-07	5.76877e-06	up
Nlug024735	65	132	2.033	1.023	0.00854716	0.0384905	up
Nlug024752	270	663	2.453	1.294	1.92571e-05	0.000258822	up
Nlug024764	269	76	0.284	-1.818	0.000171963	0.00170526	down
Nlug024771	65	245	3.766	1.913	5.70082e-09	1.6874e-07	up
Nlug024775	212	439	2.067	1.047	0.00139213	0.00937092	up
Nlug024784	24	75	3.115	1.639	0.000753508	0.0058006	up
Nlug024786	21	75	3.484	1.801	3.6428e-05	0.000452375	up
Nlug024793	362	781	2.157	1.109	0.000101819	0.00109422	up
Nlug024813	102	38	0.377	-1.406	0.000345427	0.00304887	down
Nlug024858	97	213	2.181	1.125	0.00021737	0.00207031	up
Nlug024859	32	125	3.853	1.946	5.21574e-08	1.32149e-06	up
Nlug024880	142	294	2.06	1.043	0.00139583	0.00938825	up
XLOC_000004	82	36	0.441	-1.183	0.00162405	0.0105341	down
XLOC_000013	128	321	2.503	1.324	1.04555e-05	0.000152149	up
XLOC_000032	498	237	0.477	-1.069	0.000826511	0.00623988	down
XLOC_000116	55	124	2.237	1.161	0.00132305	0.00900315	up
XLOC_000161	610	90	0.148	-2.754	1.04358e-08	2.97098e-07	down
XLOC_000184	350	79	0.227	-2.137	0.00152841	0.0100904	down
XLOC_000224	3276	435	0.133	-2.914	2.65856e-14	1.65189e-12	down
XLOC_000232	319	131	0.41	-1.286	0.000262286	0.00241581	down
XLOC_000234	128	3	0.025	-5.304	9.07786e-16	6.80101e-14	down
XLOC_000274	102	205	2.015	1.01	0.00664215	0.0318052	up
XLOC_000275	490	239	0.488	-1.034	0.000630787	0.00502669	down
XLOC_000290	631	266	0.422	-1.246	0.00125549	0.00864	down
XLOC_000293	17887	134	0.007	-7.061	1.62328e-27	3.79363e-25	down
[truncated: 919 more rows]
