# Supplementary material for: Insect-derived long non-coding RNAs function as epigenetic effectors to reprogram plant immunity
Source: Research Square preprint supplement (doi:10.21203/rs.3.rs-8297537/v1), 2025-12-12
Supplement: Supplementary file 3 [file ac3c63f89bf55c097f1511d4.xlsx]

## Sheet: Sheet1
	Supplementary data 3. Reads count of identified cross-kingdom RNAs in sample BPH-1-FS
	Gene_id	reads	location
	XLOC_003278	22	chr11
	XLOC_003752	22	chr11
	XLOC_003751	8	chr11
	XLOC_010325	8	chr3
	XLOC_010923	8	chr4
	XLOC_000580	6	chr1
	XLOC_012899	6	chr5
	XLOC_016033	6	chr7
	XLOC_015347	6	chr7
	XLOC_016451	6	chr8
	XLOC_017080	6	chr8
	XLOC_013240	5	chr5
	XLOC_001576	4	chr1
	XLOC_003451	4	chr11
	XLOC_003926	4	chr11
	XLOC_005938	4	chr14
	XLOC_009288	4	chr3
	XLOC_010208	4	chr3
	XLOC_010549	4	chr4
	XLOC_010694	4	chr4
	XLOC_013212	4	chr5
	XLOC_013244	4	chr5
	XLOC_013547	4	chr6
	XLOC_014156	4	chr6
	XLOC_016467	4	chr8
	XLOC_017102	4	chr8
	XLOC_017210	4	chr8
	XLOC_016585	4	chr8
	XLOC_017394	4	chr9
	XLOC_017845	4	chr9
	XLOC_017846	4	chr9
	XLOC_017395	4	chr9
	XLOC_017396	4	chr9
	XLOC_019189	4	chrX
	XLOC_018301	4	chrX
	XLOC_018545	4	chrX
	XLOC_008106	3	chr2
	XLOC_007267	3	chr2
	XLOC_010091	3	chr3
	XLOC_000054	2	chr1
	XLOC_001170	2	chr1
	XLOC_001171	2	chr1
	XLOC_000057	2	chr1
	XLOC_001176	2	chr1
	XLOC_000153	2	chr1
	XLOC_001403	2	chr1
	XLOC_001409	2	chr1
	XLOC_000295	2	chr1
	XLOC_000425	2	chr1
	XLOC_001532	2	chr1
	XLOC_001611	2	chr1
	XLOC_001621	2	chr1
	XLOC_000554	2	chr1
	XLOC_001674	2	chr1
	XLOC_000570	2	chr1
	XLOC_001712	2	chr1
	XLOC_001760	2	chr1
	XLOC_000655	2	chr1
	XLOC_000677	2	chr1
	XLOC_001786	2	chr1
	XLOC_001807	2	chr1
	XLOC_001908	2	chr1
	XLOC_000801	2	chr1
	XLOC_000872	2	chr1
	XLOC_001978	2	chr1
	XLOC_000884	2	chr1
	XLOC_001987	2	chr1
	XLOC_002748	2	chr10
	XLOC_002797	2	chr10
	XLOC_002242	2	chr10
	XLOC_002824	2	chr10
	XLOC_003061	2	chr10
	XLOC_003133	2	chr10
	XLOC_002594	2	chr10
	XLOC_002595	2	chr10
	XLOC_003239	2	chr10
	XLOC_003750	2	chr11
	XLOC_003277	2	chr11
	XLOC_003383	2	chr11
	XLOC_003906	2	chr11
	XLOC_003424	2	chr11
	XLOC_003685	2	chr11
	XLOC_003715	2	chr11
	XLOC_004867	2	chr12
	XLOC_004940	2	chr12
	XLOC_005064	2	chr13
	XLOC_005441	2	chr13
	XLOC_005542	2	chr13
	XLOC_005160	2	chr13
	XLOC_005226	2	chr13
	XLOC_005647	2	chr13
	XLOC_005681	2	chr13
	XLOC_005302	2	chr13
	XLOC_005700	2	chr13
	XLOC_005312	2	chr13
	XLOC_006327	2	chr14
	XLOC_006340	2	chr14
	XLOC_006363	2	chr14
	XLOC_006484	2	chr14
	XLOC_006531	2	chr14
	XLOC_006103	2	chr14
	XLOC_006140	2	chr14
	XLOC_006651	2	chr14
	XLOC_006264	2	chr14
	XLOC_007849	2	chr2
	XLOC_006940	2	chr2
	XLOC_006965	2	chr2
	XLOC_006983	2	chr2
	XLOC_007894	2	chr2
	XLOC_008062	2	chr2
	XLOC_008186	2	chr2
	XLOC_007268	2	chr2
	XLOC_007346	2	chr2
	XLOC_007357	2	chr2
	XLOC_008304	2	chr2
	XLOC_008529	2	chr2
	XLOC_008602	2	chr2
	XLOC_008980	2	chr3
	XLOC_009935	2	chr3
	XLOC_009012	2	chr3
	XLOC_009111	2	chr3
	XLOC_009112	2	chr3
	XLOC_010045	2	chr3
	XLOC_010096	2	chr3
	XLOC_010126	2	chr3
	XLOC_010252	2	chr3
	XLOC_009487	2	chr3
	XLOC_010390	2	chr3
	XLOC_009512	2	chr3
	XLOC_010630	2	chr4
	XLOC_011373	2	chr4
	XLOC_010633	2	chr4
	XLOC_011430	2	chr4
	XLOC_010706	2	chr4
	XLOC_011464	2	chr4
	XLOC_010877	2	chr4
	XLOC_011604	2	chr4
	XLOC_011697	2	chr4
	XLOC_011012	2	chr4
	XLOC_011737	2	chr4
	XLOC_011882	2	chr4
	XLOC_011143	2	chr4
	XLOC_011919	2	chr4
	XLOC_011187	2	chr4
	XLOC_011935	2	chr4
	XLOC_011201	2	chr4
	XLOC_012703	2	chr5
	XLOC_012020	2	chr5
	XLOC_012073	2	chr5
	XLOC_012805	2	chr5
	XLOC_012163	2	chr5
	XLOC_013075	2	chr5
	XLOC_012316	2	chr5
	XLOC_013105	2	chr5
	XLOC_012344	2	chr5
	XLOC_012347	2	chr5
	XLOC_013109	2	chr5
	XLOC_012372	2	chr5
	XLOC_013266	2	chr5
	XLOC_012547	2	chr5
	XLOC_013337	2	chr5
	XLOC_013548	2	chr6
	XLOC_014157	2	chr6
	XLOC_014207	2	chr6
	XLOC_013797	2	chr6
	XLOC_014419	2	chr6
	XLOC_014485	2	chr6
	XLOC_014611	2	chr6
	XLOC_013970	2	chr6
	XLOC_014769	2	chr7
	XLOC_015490	2	chr7
	XLOC_014796	2	chr7
	XLOC_015636	2	chr7
	XLOC_015005	2	chr7
	XLOC_015025	2	chr7
	XLOC_015708	2	chr7
	XLOC_015759	2	chr7
	XLOC_015065	2	chr7
	XLOC_015070	2	chr7
	XLOC_015210	2	chr7
	XLOC_015404	2	chr7
	XLOC_016097	2	chr7
	XLOC_017152	2	chr8
	XLOC_017830	2	chr9
	XLOC_017377	2	chr9
	XLOC_017658	2	chr9
	XLOC_019512	2	chrX
	XLOC_018628	2	chrX
	XLOC_018895	2	chrX
	XLOC_019815	2	chrX
	XLOC_020012	2	chrY
	XLOC_020127	2	chrY
	XLOC_001315	1	chr1
	XLOC_003542	1	chr11
	XLOC_005030	1	chr12
	XLOC_006959	1	chr2
	XLOC_010092	1	chr3
	XLOC_009331	1	chr3
	XLOC_011494	1	chr4
	XLOC_012465	1	chr5
	XLOC_013759	1	chr6
	XLOC_015451	1	chr7
	XLOC_016956	1	chr8
	XLOC_016454	1	chr8
	XLOC_017277	1	chr8
	XLOC_017725	1	chr9
	XLOC_017726	1	chr9
	XLOC_018419	1	chrX
	Nlug002484	44	chr11
	Nlug005707	42	chr2
	Nlug005332	30	chr3
	Nlug001363	25	chr11
	Nlug003195	22	chr2
	Nlug004303	21	chr1
	Nlug013388	21	chr5
	Nlug001236	20	chr4
	Nlug012170	19	chr12
	Nlug007740	18	chr5
	Nlug009012	18	chr8
	Nlug008113	17	chr1
	Nlug008262	17	chr3
	Nlug003628	16	chr11
	Nlug012162	16	chr12
	Nlug005505	16	chr5
	Nlug016240	15	chr8
	Nlug003438	14	chr1
	Nlug012161	14	chr12
	Nlug001066	14	chr3
	Nlug007302	14	chr4
	Nlug009019	14	chr8
	Nlug004977	14	chr8
	Nlug010799	13	chr1
	Nlug007194	12	chr10
	Nlug009460	12	chr12
	Nlug012168	12	chr12
	Nlug014148	12	chr12
	Nlug004112	12	chr3
	Nlug006325	12	chr4
	Nlug003233	10	chr1
	Nlug010593	10	chr13
	Nlug014175	10	chr2
	Nlug015158	10	chr2
	Nlug017471	10	chr4
	Nlug015115	10	chr6
	Nlug016643	10	chr6
	Nlug017156	10	chr7
	Nlug013663	10	chr8
	Nlug004233	10	chr8
	Nlug010509	10	chr8
	Nlug012039	10	chr9
	Nlug018245	9	chr9
	Nlug006890	8	chr1
	Nlug005582	8	chr1
	Nlug000274	8	chr1
	Nlug016771	8	chr13
	Nlug009413	8	chr13
	Nlug017420	8	chr4
	Nlug007716	8	chr4
	Nlug007341	8	chr4
	Nlug004572	8	chr5
	Nlug013724	8	chr6
	Nlug010896	8	chr7
	Nlug003930	8	chr7
	Nlug002639	8	chr7
	Nlug002063	8	chr8
	Nlug009433	7	chr1
	Nlug003641	7	chr2
	Nlug000567	7	chr3
	Nlug014607	7	chr5
	Nlug014903	7	chr6
	Nlug004973	7	chr8
	Nlug019425	7	chr8
	Nlug003241	6	chr1
	Nlug004302	6	chr1
	Nlug009446	6	chr1
	Nlug014724	6	chr1
	Nlug000322	6	chr1
	Nlug004128	6	chr1
	Nlug004219	6	chr1
	Nlug011923	6	chr11
	Nlug002390	6	chr11
	Nlug015960	6	chr11
	Nlug020129	6	chr11
	Nlug015220	6	chr12
	Nlug017582	6	chr12
	Nlug014673	6	chr14
	Nlug019594	6	chr2
	Nlug007698	6	chr2
	Nlug002681	6	chr2
	Nlug005851	6	chr3
	Nlug002994	6	chr3
	Nlug006002	6	chr3
	Nlug015522	6	chr3
	Nlug001303	6	chr4
	Nlug001311	6	chr4
	Nlug004041	6	chr5
	Nlug012691	6	chr6
	Nlug007789	6	chr6
	Nlug003941	6	chr7
	Nlug007079	6	chr7
	Nlug007070	6	chr7
	Nlug007064	6	chr7
	Nlug006928	6	chr7
	Nlug015357	6	chr8
	Nlug010853	6	chr8
	Nlug010312	6	chr8
	Nlug002054	6	chr8
	Nlug006223	6	chr8
	Nlug006257	6	chr8
	Nlug004956	6	chr8
	Nlug007591	5	chr1
	Nlug009105	5	chr1
	Nlug008687	5	chr2
	Nlug004058	5	chr3
	Nlug014795	5	chr7
	Nlug010621	5	chr7
	Nlug016444	4	chr1
	Nlug020335	4	chr1
	Nlug011131	4	chr1
	Nlug011123	4	chr1
	Nlug003504	4	chr1
	Nlug001115	4	chr1
	Nlug010673	4	chr1
	Nlug006627	4	chr1
	Nlug006914	4	chr1
	Nlug003820	4	chr1
	Nlug003821	4	chr1
	Nlug003256	4	chr1
	Nlug000959	4	chr1
	Nlug009103	4	chr1
	Nlug003981	4	chr1
	Nlug000290	4	chr1
	Nlug000240	4	chr1
	Nlug003074	4	chr1
	Nlug009875	4	chr1
	Nlug005466	4	chr10
	Nlug005465	4	chr10
	Nlug001885	4	chr10
	Nlug001492	4	chr10
	Nlug011805	4	chr10
	Nlug000338	4	chr10
	Nlug000419	4	chr10
	Nlug001315	4	chr11
	Nlug002447	4	chr11
	Nlug015173	4	chr11
	Nlug016407	4	chr12
	Nlug003420	4	chr12
	Nlug016826	4	chr12
	Nlug008639	4	chr12
	Nlug015611	4	chr13
	Nlug016197	4	chr13
	Nlug016198	4	chr13
	Nlug016038	4	chr14
	Nlug019387	4	chr14
	Nlug000517	4	chr2
	Nlug013249	4	chr2
	Nlug002833	4	chr2
	Nlug002851	4	chr2
	Nlug002894	4	chr2
	Nlug019436	4	chr2
	Nlug018561	4	chr2
	Nlug005879	4	chr3
	Nlug005872	4	chr3
	Nlug003025	4	chr3
	Nlug000987	4	chr3
	Nlug001070	4	chr3
	Nlug001080	4	chr3
	Nlug024755	4	chr3
	Nlug011041	4	chr3
	Nlug001215	4	chr3
	Nlug008211	4	chr3
	Nlug006812	4	chr3
	Nlug000579	4	chr3
	Nlug014301	4	chr3
	Nlug009952	4	chr3
	Nlug005289	4	chr4
	Nlug005296	4	chr4
	Nlug005314	4	chr4
	Nlug006329	4	chr4
	Nlug005115	4	chr4
	Nlug005074	4	chr4
	Nlug007313	4	chr4
	Nlug007741	4	chr5
	Nlug008301	4	chr5
	Nlug015302	4	chr5
	Nlug000803	4	chr5
	Nlug017447	4	chr5
	Nlug016287	4	chr5
	Nlug001832	4	chr5
	Nlug013908	4	chr6
	Nlug011268	4	chr6
	Nlug007656	4	chr6
	Nlug001774	4	chr6
	Nlug010862	4	chr6
	Nlug010402	4	chr7
	Nlug000156	4	chr7
	Nlug002208	4	chr7
	Nlug006726	4	chr7
	Nlug006752	4	chr7
	Nlug013233	4	chr7
	Nlug020965	4	chr7
	Nlug013397	4	chr7
	Nlug002071	4	chr8
	Nlug012444	4	chr8
	Nlug004948	4	chr8
	Nlug004975	4	chr8
	Nlug004985	4	chr8
	Nlug008664	4	chr8
	Nlug019424	4	chr8
	Nlug019037	4	chr8
	Nlug019450	4	chr8
	Nlug004847	4	chr9
	Nlug017883	4	chr9
	Nlug020142	4	chr9
	Nlug017105	4	chrX
	Nlug013676	4	chrX
	Nlug003388	3	chr12
	Nlug022054	3	chr14
	Nlug000548	3	chr2
	Nlug005217	3	chr3
	Nlug005561	3	chr3
	Nlug022080	3	chr5
	Nlug017159	3	chr5
	Nlug012149	3	chr6
	Nlug019170	3	chr7
	Nlug012135	3	chr7
	Nlug010895	3	chr7
	Nlug019321	2	chr1
	Nlug017074	2	chr1
	Nlug015763	2	chr1
	Nlug016447	2	chr1
	Nlug007888	2	chr1
	Nlug007879	2	chr1
	Nlug007886	2	chr1
	Nlug004785	2	chr1
	Nlug003434	2	chr1
	Nlug003437	2	chr1
	Nlug003468	2	chr1
	Nlug011723	2	chr1
	Nlug011721	2	chr1
	Nlug011709	2	chr1
	Nlug005804	2	chr1
	Nlug006313	2	chr1
	Nlug006284	2	chr1
	Nlug001143	2	chr1
	Nlug001134	2	chr1
	Nlug010655	2	chr1
	Nlug010695	2	chr1
	Nlug012943	2	chr1
	Nlug012948	2	chr1
	Nlug010966	2	chr1
	Nlug006604	2	chr1
	Nlug006612	2	chr1
	Nlug006619	2	chr1
	Nlug012390	2	chr1
	Nlug011395	2	chr1
	Nlug006885	2	chr1
	Nlug003828	2	chr1
	Nlug007573	2	chr1
	Nlug007579	2	chr1
	Nlug013281	2	chr1
	Nlug016577	2	chr1
	Nlug004375	2	chr1
	Nlug008503	2	chr1
	Nlug008333	2	chr1
	Nlug008316	2	chr1
	Nlug006862	2	chr1
	Nlug005581	2	chr1
	Nlug005616	2	chr1
	Nlug003213	2	chr1
	Nlug003229	2	chr1
	Nlug003268	2	chr1
	Nlug009492	2	chr1
	Nlug009476	2	chr1
	Nlug000952	2	chr1
	Nlug000967	2	chr1
	Nlug009114	2	chr1
	Nlug004650	2	chr1
	Nlug009396	2	chr1
	Nlug006784	2	chr1
	Nlug009444	2	chr1
	Nlug009452	2	chr1
	Nlug003983	2	chr1
	Nlug014722	2	chr1
	Nlug000302	2	chr1
	Nlug000292	2	chr1
	Nlug004174	2	chr1
	Nlug004181	2	chr1
	Nlug024856	2	chr1
	Nlug003090	2	chr1
	Nlug005666	2	chr1
	Nlug005651	2	chr1
	Nlug009876	2	chr1
	Nlug009872	2	chr1
	Nlug009721	2	chr1
	Nlug009738	2	chr10
	Nlug005443	2	chr10
	Nlug001728	2	chr10
	Nlug006429	2	chr10
	Nlug006449	2	chr10
	Nlug001903	2	chr10
	Nlug001489	2	chr10
	Nlug001493	2	chr10
	Nlug001500	2	chr10
	Nlug001511	2	chr10
	Nlug003850	2	chr10
	Nlug003852	2	chr10
	Nlug016043	2	chr10
	Nlug016047	2	chr10
	Nlug020497	2	chr10
	Nlug007430	2	chr10
	Nlug024669	2	chr10
	Nlug014997	2	chr10
	Nlug013627	2	chr10
	Nlug000371	2	chr10
	Nlug000380	2	chr10
	Nlug000375	2	chr10
	Nlug019096	2	chr10
	Nlug002398	2	chr10
	Nlug012369	2	chr10
	Nlug012373	2	chr10
	Nlug017131	2	chr10
	Nlug016652	2	chr10
	Nlug014418	2	chr10
	Nlug018398	2	chr11
	Nlug024686	2	chr11
	Nlug020986	2	chr11
	Nlug013180	2	chr11
	Nlug001327	2	chr11
	Nlug001323	2	chr11
	Nlug001394	2	chr11
	Nlug024753	2	chr11
	Nlug001408	2	chr11
	Nlug001404	2	chr11
	Nlug001407	2	chr11
	Nlug002358	2	chr11
	Nlug002342	2	chr11
	Nlug024785	2	chr11
	Nlug002301	2	chr11
	Nlug002294	2	chr11
	Nlug002443	2	chr11
	Nlug002454	2	chr11
	Nlug002453	2	chr11
	Nlug002493	2	chr11
	Nlug002569	2	chr11
	Nlug017594	2	chr11
	Nlug015363	2	chr11
	Nlug015956	2	chr11
	Nlug015680	2	chr11
	Nlug021084	2	chr11
	Nlug009464	2	chr12
	Nlug012169	2	chr12
	Nlug012163	2	chr12
	Nlug012164	2	chr12
	Nlug011772	2	chr12
	Nlug016249	2	chr12
	Nlug003414	2	chr12
	Nlug003413	2	chr12
	Nlug003392	2	chr12
	Nlug003390	2	chr12
	Nlug016827	2	chr12
	Nlug020174	2	chr12
	Nlug010992	2	chr12
	Nlug014158	2	chr12
	Nlug013133	2	chr12
	Nlug008641	2	chr12
	Nlug015316	2	chr12
	Nlug014242	2	chr12
	Nlug009685	2	chr12
	Nlug009677	2	chr12
	Nlug012743	2	chr12
	Nlug017410	2	chr12
	Nlug018532	2	chr13
	Nlug018533	2	chr13
	Nlug015484	2	chr13
	Nlug019836	2	chr13
	Nlug012842	2	chr13
	Nlug024849	2	chr13
	Nlug008197	2	chr13
	Nlug008001	2	chr13
	Nlug015614	2	chr13
	Nlug014574	2	chr13
	Nlug012911	2	chr13
	Nlug009421	2	chr13
	Nlug009415	2	chr13
	Nlug012758	2	chr14
	Nlug012756	2	chr14
	Nlug016207	2	chr14
	Nlug017911	2	chr14
	Nlug018009	2	chr14
	Nlug011656	2	chr2
	Nlug003677	2	chr2
	Nlug007679	2	chr2
	Nlug007668	2	chr2
	Nlug000523	2	chr2
	Nlug000562	2	chr2
	Nlug003185	2	chr2
	Nlug003180	2	chr2
	Nlug003144	2	chr2
	Nlug001536	2	chr2
	Nlug005638	2	chr2
	Nlug019572	2	chr2
	Nlug003689	2	chr2
	Nlug003711	2	chr2
	Nlug010078	2	chr2
	Nlug012283	2	chr2
	Nlug006640	2	chr2
	Nlug006641	2	chr2
	Nlug006633	2	chr2
	Nlug013166	2	chr2
	Nlug015227	2	chr2
	Nlug024760	2	chr2
	Nlug005706	2	chr2
	Nlug005708	2	chr2
	Nlug005754	2	chr2
	Nlug007263	2	chr2
	Nlug007274	2	chr2
	Nlug007281	2	chr2
	Nlug006678	2	chr2
	Nlug006696	2	chr2
	Nlug012620	2	chr2
	Nlug001447	2	chr2
	Nlug001449	2	chr2
	Nlug001460	2	chr2
	Nlug001464	2	chr2
	Nlug024844	2	chr2
	Nlug010411	2	chr2
	Nlug010407	2	chr2
	Nlug011958	2	chr2
	Nlug007692	2	chr2
	Nlug002720	2	chr2
	Nlug002873	2	chr2
	Nlug002882	2	chr2
	Nlug002903	2	chr2
	Nlug016607	2	chr2
	Nlug006368	2	chr2
	Nlug001605	2	chr2
	Nlug001598	2	chr2
	Nlug001582	2	chr2
	Nlug001561	2	chr2
	Nlug001548	2	chr2
	Nlug005825	2	chr2
	Nlug020251	2	chr2
	Nlug018153	2	chr2
	Nlug018402	2	chr2
	Nlug018487	2	chr2
	Nlug015362	2	chr2
	Nlug019199	2	chr2
	Nlug016636	2	chr2
	Nlug013201	2	chr3
	Nlug014702	2	chr3
	Nlug014697	2	chr3
	Nlug014071	2	chr3
	Nlug005864	2	chr3
	Nlug005914	2	chr3
	Nlug004060	2	chr3
	Nlug004082	2	chr3
	Nlug004083	2	chr3
	Nlug004105	2	chr3
	Nlug005221	2	chr3
	Nlug005224	2	chr3
	Nlug009516	2	chr3
	Nlug000763	2	chr3
	Nlug003047	2	chr3
	Nlug003044	2	chr3
	Nlug003041	2	chr3
	Nlug003009	2	chr3
	Nlug003010	2	chr3
	Nlug002984	2	chr3
	Nlug002983	2	chr3
	Nlug008259	2	chr3
	Nlug000985	2	chr3
	Nlug001051	2	chr3
	Nlug001048	2	chr3
	Nlug001086	2	chr3
	Nlug002012	2	chr3
	Nlug002013	2	chr3
	Nlug008621	2	chr3
	Nlug009827	2	chr3
	Nlug012098	2	chr3
	Nlug008941	2	chr3
	Nlug005537	2	chr3
	Nlug020021	2	chr3
	Nlug024731	2	chr3
	Nlug019126	2	chr3
	Nlug019125	2	chr3
	Nlug010383	2	chr3
	Nlug013054	2	chr3
	Nlug011026	2	chr3
	Nlug011028	2	chr3
	Nlug011029	2	chr3
	Nlug009993	2	chr3
	Nlug014845	2	chr3
	Nlug008210	2	chr3
	Nlug005357	2	chr3
	Nlug009282	2	chr3
	Nlug009284	2	chr3
	Nlug003608	2	chr3
	Nlug000879	2	chr3
	Nlug000917	2	chr3
	Nlug000945	2	chr3
	Nlug007462	2	chr3
	Nlug007469	2	chr3
	Nlug007530	2	chr3
	Nlug007544	2	chr3
	Nlug005679	2	chr3
	Nlug005681	2	chr3
	Nlug006808	2	chr3
	Nlug000584	2	chr3
	Nlug000573	2	chr3
	Nlug017169	2	chr3
	Nlug003204	2	chr3
	Nlug000433	2	chr3
	Nlug000502	2	chr3
	Nlug006032	2	chr3
	Nlug006006	2	chr3
	Nlug014323	2	chr3
	Nlug009614	2	chr3
	Nlug009611	2	chr3
	Nlug013702	2	chr4
	Nlug013984	2	chr4
	Nlug004712	2	chr4
	Nlug004716	2	chr4
	Nlug004710	2	chr4
	Nlug021210	2	chr4
	Nlug003753	2	chr4
	Nlug005250	2	chr4
	Nlug005299	2	chr4
	Nlug005327	2	chr4
	Nlug006334	2	chr4
	Nlug006328	2	chr4
	Nlug006331	2	chr4
	Nlug008376	2	chr4
	Nlug008156	2	chr4
	Nlug005123	2	chr4
	Nlug024692	2	chr4
	Nlug005946	2	chr4
	Nlug004499	2	chr4
	Nlug010434	2	chr4
	Nlug005085	2	chr4
	Nlug015031	2	chr4
	Nlug005020	2	chr4
	Nlug005028	2	chr4
	Nlug005032	2	chr4
	Nlug007726	2	chr4
	Nlug011905	2	chr4
	Nlug011782	2	chr4
	Nlug001295	2	chr4
	Nlug001296	2	chr4
	Nlug001269	2	chr4
	Nlug001249	2	chr4
	Nlug001253	2	chr4
	Nlug009630	2	chr4
	Nlug009627	2	chr4
	Nlug009623	2	chr4
	Nlug008429	2	chr4
	Nlug008474	2	chr4
	Nlug008481	2	chr4
	Nlug014168	2	chr4
	Nlug010770	2	chr4
	Nlug004861	2	chr4
	Nlug002933	2	chr5
	Nlug002944	2	chr5
	Nlug002959	2	chr5
	Nlug012172	2	chr5
	Nlug008310	2	chr5
	Nlug009383	2	chr5
	Nlug013836	2	chr5
	Nlug001417	2	chr5
	Nlug001419	2	chr5
	Nlug001442	2	chr5
	Nlug000810	2	chr5
	Nlug005510	2	chr5
	Nlug022081	2	chr5
	Nlug007085	2	chr5
	Nlug007809	2	chr5
	Nlug015012	2	chr5
	Nlug004030	2	chr5
	Nlug011684	2	chr5
	Nlug008742	2	chr5
	Nlug008737	2	chr5
	Nlug004566	2	chr5
	Nlug002118	2	chr5
	Nlug003956	2	chr5
	Nlug000660	2	chr5
	Nlug000635	2	chr5
	Nlug001844	2	chr5
	Nlug001910	2	chr5
	Nlug015871	2	chr5
	Nlug012794	2	chr5
	Nlug011606	2	chr5
	Nlug008896	2	chr5
	Nlug008878	2	chr5
	Nlug014521	2	chr5
	Nlug001943	2	chr5
	Nlug016841	2	chr5
	Nlug013516	2	chr5
	Nlug024873	2	chr5
	Nlug011172	2	chr5
	Nlug012692	2	chr6
	Nlug012693	2	chr6
	Nlug015147	2	chr6
	Nlug018451	2	chr6
	Nlug013413	2	chr6
	Nlug002609	2	chr6
	Nlug002619	2	chr6
	Nlug016935	2	chr6
	Nlug011270	2	chr6
	Nlug011072	2	chr6
	Nlug011062	2	chr6
	Nlug007792	2	chr6
	Nlug007775	2	chr6
	Nlug008060	2	chr6
	Nlug011544	2	chr6
	Nlug007642	2	chr6
	Nlug001827	2	chr6
	Nlug007100	2	chr6
	Nlug005976	2	chr6
	Nlug003560	2	chr6
	Nlug010871	2	chr6
	Nlug010855	2	chr6
	Nlug004579	2	chr6
	Nlug001720	2	chr6
	Nlug001707	2	chr6
	Nlug001670	2	chr6
	Nlug001651	2	chr6
	Nlug001655	2	chr6
	Nlug004520	2	chr6
	Nlug006386	2	chr6
	Nlug006380	2	chr6
	Nlug011868	2	chr6
	Nlug011194	2	chr6
	Nlug002584	2	chr6
	Nlug011224	2	chr7
	Nlug017276	2	chr7
	Nlug004871	2	chr7
	Nlug010889	2	chr7
	Nlug000200	2	chr7
	Nlug000198	2	chr7
	Nlug000172	2	chr7
	Nlug000717	2	chr7
	Nlug006730	2	chr7
	Nlug006729	2	chr7
	Nlug013221	2	chr7
	Nlug013219	2	chr7
	Nlug008530	2	chr7
	Nlug002652	2	chr7
	Nlug002644	2	chr7
	Nlug015573	2	chr7
	Nlug007065	2	chr7
	Nlug012228	2	chr7
	Nlug006542	2	chr7
	Nlug007847	2	chr7
	Nlug006927	2	chr7
	Nlug016912	2	chr7
	Nlug016910	2	chr7
	Nlug008863	2	chr7
	Nlug008861	2	chr7
	Nlug016241	2	chr8
	Nlug010317	2	chr8
	Nlug004264	2	chr8
	Nlug004249	2	chr8
	Nlug004245	2	chr8
	Nlug004243	2	chr8
	Nlug000035	2	chr8
	Nlug000042	2	chr8
	Nlug000065	2	chr8
	Nlug000073	2	chr8
	Nlug003883	2	chr8
	Nlug008758	2	chr8
	Nlug009018	2	chr8
	Nlug010528	2	chr8
	Nlug010529	2	chr8
	Nlug010527	2	chr8
	Nlug010471	2	chr8
	Nlug002084	2	chr8
	Nlug002066	2	chr8
	Nlug001179	2	chr8
	Nlug006217	2	chr8
	Nlug006226	2	chr8
	Nlug017864	2	chr8
	Nlug004951	2	chr8
	Nlug004986	2	chr8
	Nlug004999	2	chr8
	Nlug005012	2	chr8
	Nlug011824	2	chr8
	Nlug006993	2	chr8
	Nlug004843	2	chr9
	Nlug013761	2	chr9
	Nlug024766	2	chr9
	Nlug013854	2	chr9
	Nlug013849	2	chr9
	Nlug014807	2	chr9
	Nlug012580	2	chrX
	Nlug004481	2	chrX
	Nlug008764	2	chrX
	Nlug003338	2	chrX
	Nlug003344	2	chrX
	Nlug011996	2	chrX
	Nlug008360	2	chrX
	Nlug002282	2	chrX
	Nlug008853	2	chrX
	Nlug005409	2	chrX
	Nlug012522	2	chrX
	Nlug012521	2	chrX
	Nlug011124	1	chr1
	Nlug006916	1	chr1
	Nlug005601	1	chr1
	Nlug005597	1	chr1
	Nlug012022	1	chr1
	Nlug000979	1	chr1
	Nlug015641	1	chr1
	Nlug014714	1	chr1
	Nlug000315	1	chr1
	Nlug003092	1	chr1
	Nlug021489	1	chr1
	Nlug008112	1	chr1
	Nlug017658	1	chr10
	Nlug014215	1	chr10
	Nlug017129	1	chr10
	Nlug002545	1	chr11
	Nlug014644	1	chr11
	Nlug012165	1	chr12
	Nlug014151	1	chr12
	Nlug009686	1	chr12
	Nlug022637	1	chr13
	Nlug008914	1	chr14
	Nlug003189	1	chr2
	Nlug003703	1	chr2
	Nlug005738	1	chr2
	Nlug006697	1	chr2
	Nlug003741	1	chr3
	Nlug009291	1	chr3
	Nlug000595	1	chr3
	Nlug024658	1	chr4
	Nlug005949	1	chr4
	Nlug007728	1	chr4
	Nlug011451	1	chr4
	Nlug005508	1	chr5
	Nlug007083	1	chr5
	Nlug012148	1	chr6
	Nlug017155	1	chr7
	Nlug012226	1	chr7
	Nlug012601	1	chr7
	Nlug016242	1	chr8
	Nlug004252	1	chr8
	Nlug010523	1	chr8
	Nlug018863	1	chr8
	Nlug009321	1	chrX
	Nlug015535	1	chrX
	Nlug003361	1	chrX
