# Supplementary material for: Insect-derived long non-coding RNAs function as epigenetic effectors to reprogram plant immunity
Source: Research Square preprint supplement (doi:10.21203/rs.3.rs-8297537/v1), 2025-12-12
Supplement: Supplementary file 4 [file c819f4b00b9d00cc92638d72.docx]

**Supplementary Information for**

**Insect-derived long non-coding RNAs function as epigenetic effectors to reprogram plant immunity**

Dong Wen1,2,3, Shan Jiang1,2,3, Zhuangzhuang Qiao1,2,3, Chi Liu1,2,3, Jun Wu1,2,3, Rong Hu1,2,3, Yeqi Zhu1,2,3, Yueping He 2,3, Weihua Ma1,2,3, Hongxia Hua1,2,3#, Yazhou Chen1,2,3#

1 Hubei Hongshan Laboratory, Wuhan, 430070, China.

2 Hubei Insect Resources Utilization and Sustainable Pest Management Key Laboratory.

3 College of Plant Science and Technology, Huazhong Agricultural University, Wuhan, 430070, China.

# Correspondence: Yazhou Chen, Hongxia Hua

Email: [yzchen@mail.hzau.edu.cn;](mailto:yzchen@mail.hzau.edu.cn;) [huahongxia@mail.hzau.edu.cn](mailto:huahongxia@mail.hzau.edu.cn)

ORCID IDs: 0009-0003-2396-0338 (Y.C.); 0000-0001-6068-7287(H.H.).

**This PDF file includes：**

Supplementary file:

Supplementary Figure 1 to Figure 12

Supplementary Table 1 to Table 6

SI References

**Other supplementary materials for this manuscript include the following:**

Supplementary data 1 to 6


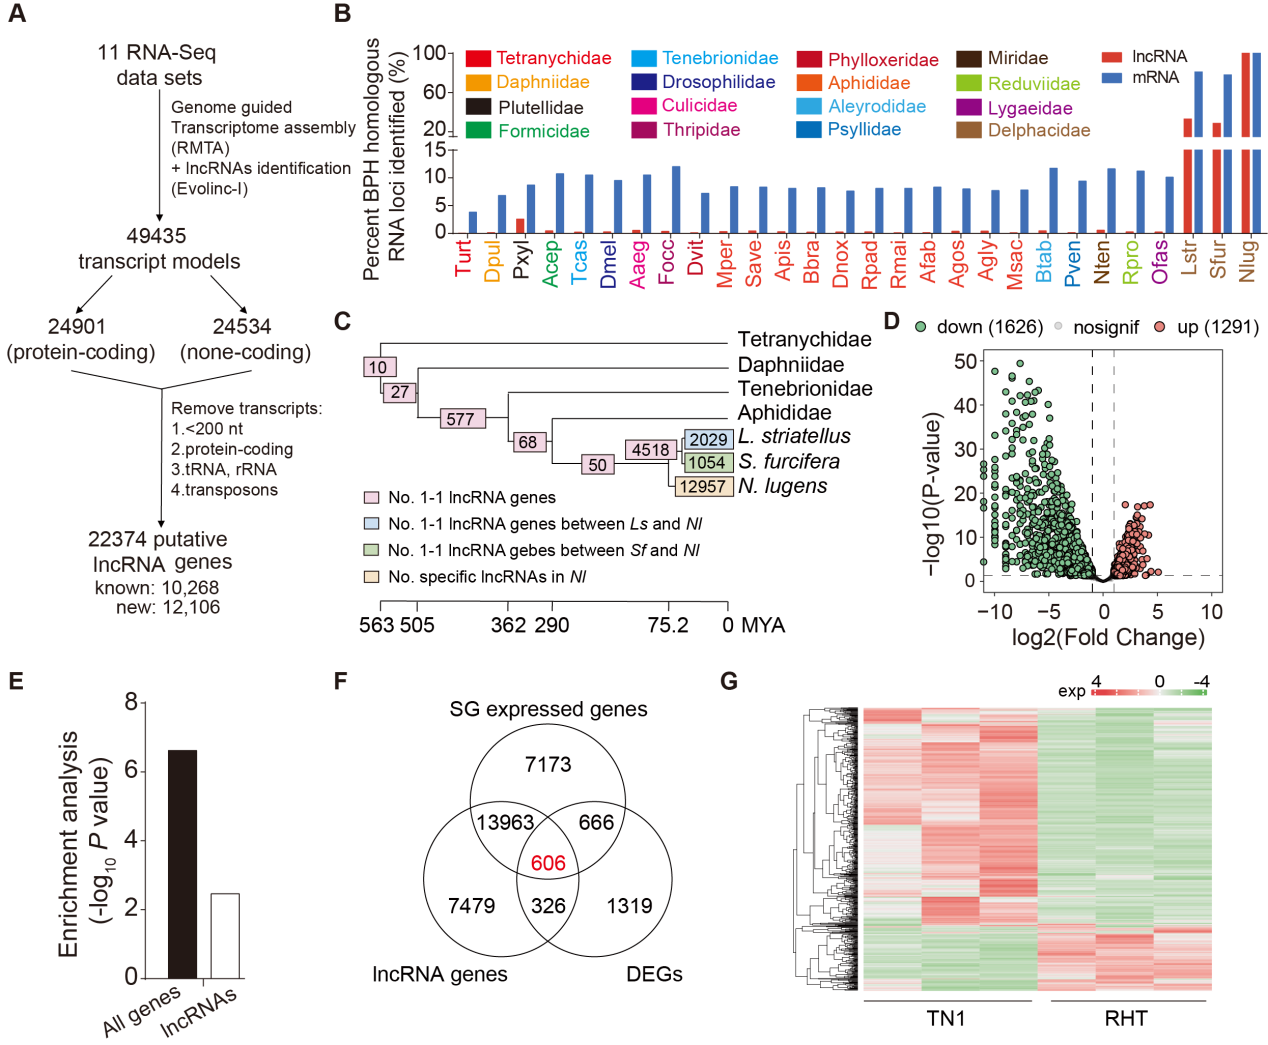


**Supplementary Figure 1** | **Identification of lncRNA genes BPH and analysis their response to resistant rice.** (A) Workflow for the identification of lncRNAs in BPH (For details, please refer to the Materials and Methods section). (B) Protein-coding genes (mRNAs) exhibit higher conservation than lncRNAs across 28 species. Detailed species information and data sources are listed in Supplementary Table 5. Red and blue bars indicate the percentages of BPH-homologous lncRNA and mRNA loci identified in each species, respectively. Percentage of BPH-homologous loci in each species was calculated as the number of homologs divided by total BPH transcripts. (C) Phylogenetic distribution of 1:1 orthologous and species-specific lncRNAs in BPH. Numbers in the pink boxes represent lncRNAs homologous to BPH in other species outside Delphacidae across different evolutionary periods; numbers in the blue and green boxes indicate lncRNAs homologous to BPH in the *L. striatellus* and *S. furcifera*, respectively; number in the yellow box represent BPH-specific lncRNAs. (D) Volcano plot of DEGs in BPH feeding on resistant rice RHT versus susceptible rice TN1. (E) Salivary gland was enriched for DE genes and DE lncRNAs in BPH. Fisher's exact test was used to assess the enrichment of DE genes and DE lncRNAs in the salivary gland. For each category, the number expressed in the salivary gland was compared to the total number of DE genes or DE lncRNAs. Enrichment with *P* < 0.05 was considered statistically significant. Black bars represent all DEGs; white bars, candidate lncRNAs. (F) Venn diagram showing the overlap of lncRNAs identified in BPH, DEGs in response to RHT, and genes expressed in BPH salivary gland. (G) Heatmap oftranscript abundance (TPM values) corresponding to the genes in (F).


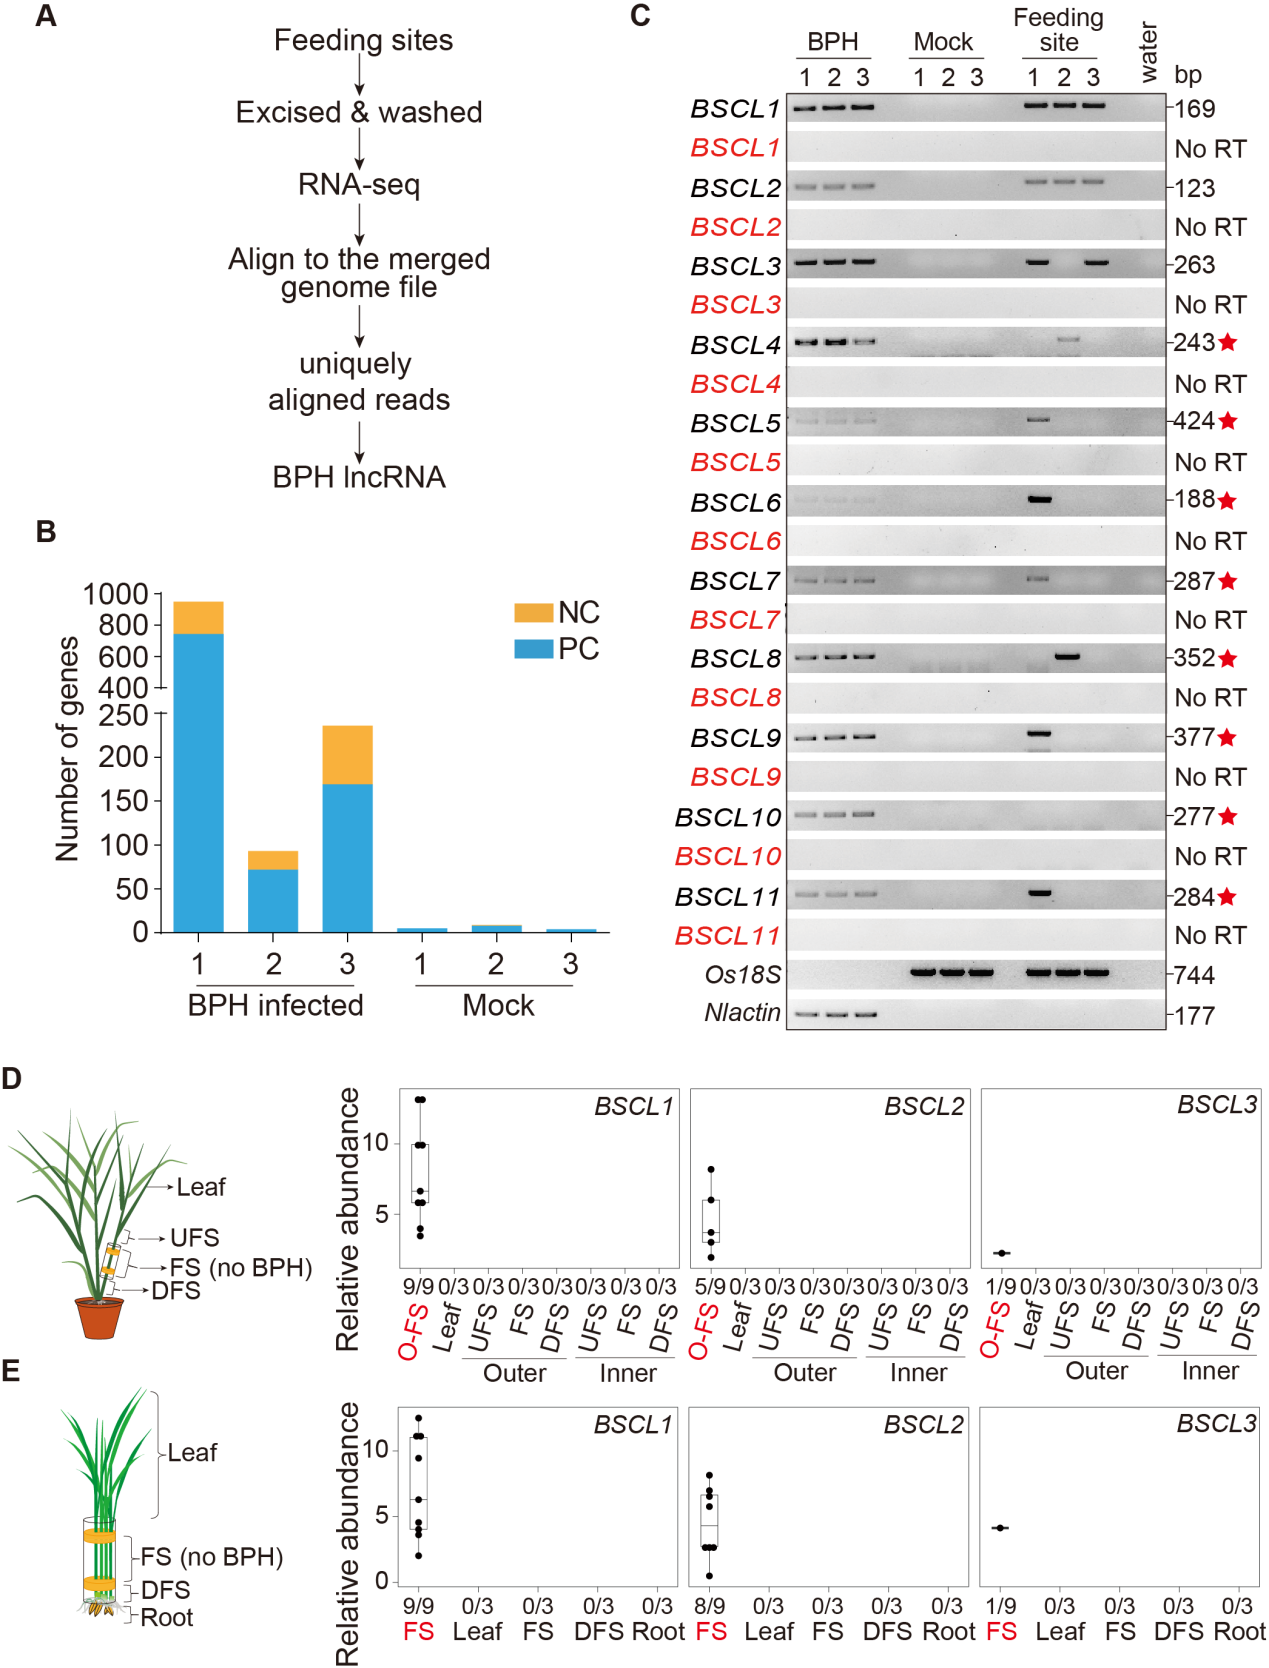


**Supplementary Figure 2** | **Identification of BPH-delivered RNAs in rice plants.** (A) Workflow for the identification of BPH-delivered RNA transcripts in FS (For details, please refer to the Materials and Methods section). (B) Numbers of BPH-delivered RNA transcripts identified across different samples. NC, none coding transcripts; PC, protein coding transcripts. (C) *BSCL*s were translocated into the FS of rice plants. No RT indicates PCR performed using RNA as the template without reverse transcription. Red stars denote genes subjected to a second round of PCR using PCR products as templates. (D) *BSCL1*, *BSCL2*, and *BSCL3* were undetectable in leaf blade, FS, UFS, and DFS regions in uninfested tillering stage rice plants. A schematic of leaf blade, FS, UFS, and DFS is shown on the left. Box plots indicate the relative abundance of *BSCL1*, *BSCL2*, and *BSCL3* at different sampling sites, determined by qRT-PCR. (E) *BSCL1*, *BSCL2*, and *BSCL3* were undetectable in leaf, FS, DFS, and root regions in uninfested three-leaf stage rice plants. A schematic of leaf blade, FS, DFS and root is shown on the left. Box plots indicate the relative abundance of *BSCL1*, *BSCL2*, and *BSCL3* at different sampling sites, determined by qRT-PCR. Numbers under the boxpot show the detection ratio of *BSCL1, BSCL2* and *BSCL3* at each site. The sampling sites marked in red are from samples that were fed by BPH, consistent with those in Fig. 1.


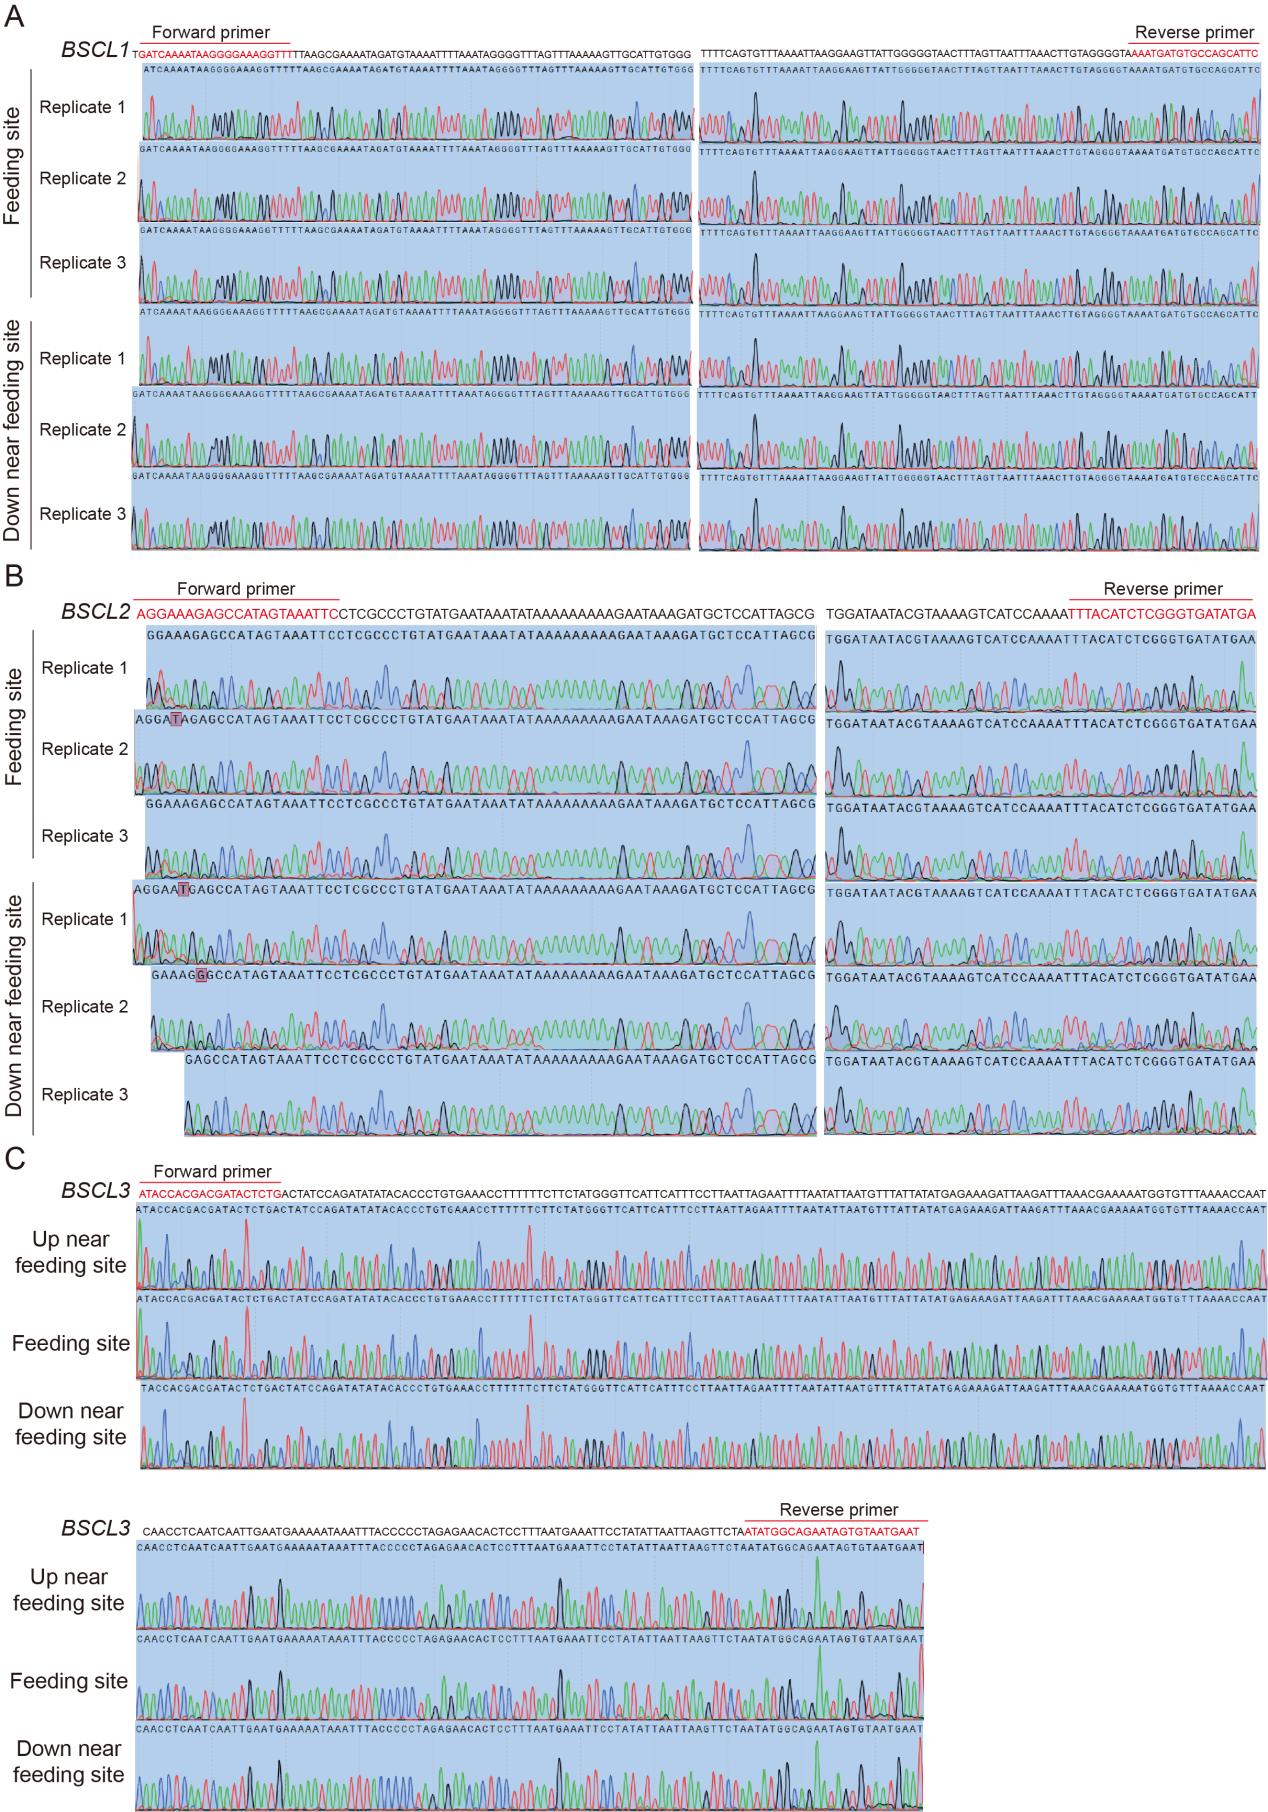


**Supplementary Figure 3** | **Sequences of BPH *BSCLs* amplified from rice plants via RT-PCR.** The cDNA sequence of *BSCL1* (A), *BSCL2* (B), and *BSCL3* (C) were amplified from FS, DFS, and UFS of rice plants with corresponding forward and reverse primers (Primer sequences are listed in Supplementary Table 6). The sequence of PCR products were identical to the corresponding regions of their respective *BSCL*s.


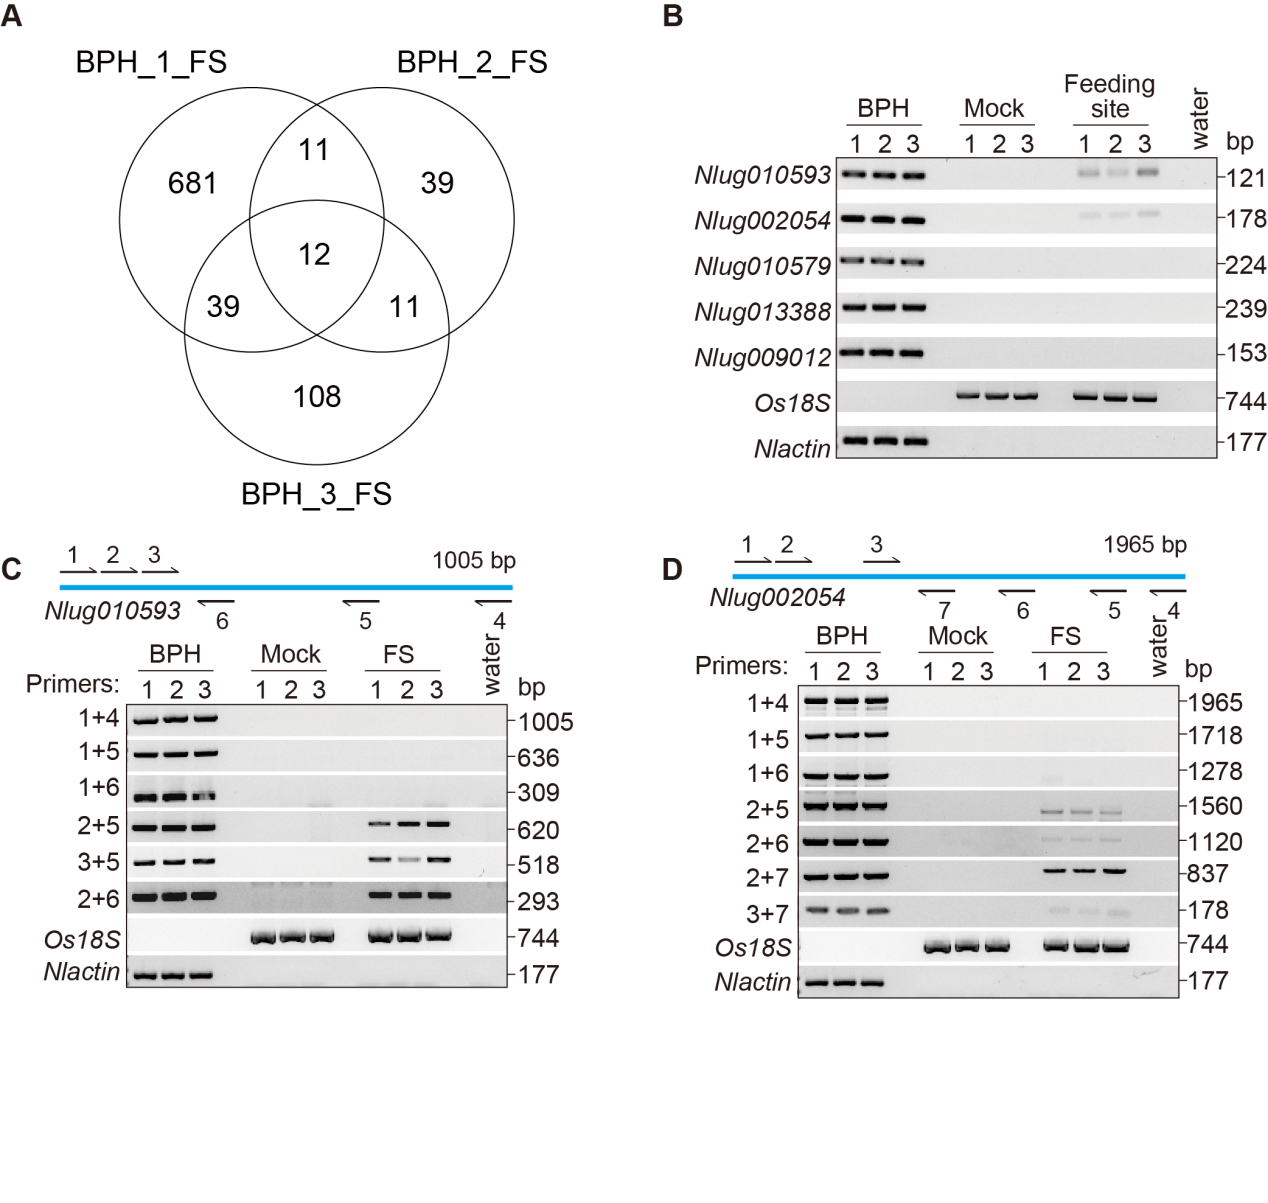


**Supplementary Figure 4** | **BPH mRNAs are transcloated into rice plants.** (A) Venn diagram showing the numbers of BPH mRNAs identified in FS samples. (B) BPH mRNA (*Nlug010593* and *Nlug002054*) transcripts were translocated into the FS of rice plants. (C, D) Identification of *Nlug010593* (C) and *Nlug002054* (D) transcripts sizes in BPH and FS. Schematics above the gel images indicate the locations of primers used to detect *Nlug010593* (primers 1–6) and *Nlug002054* (primers 1–7) transcripts in BPH and FS by RT-PCR, shown as black arrows. The full-lenghth of *Nlug010593* (C) and *Nlug002054* (D) transcripts were detected in BPH and not in FS, where the shorter fragements were found in FS.


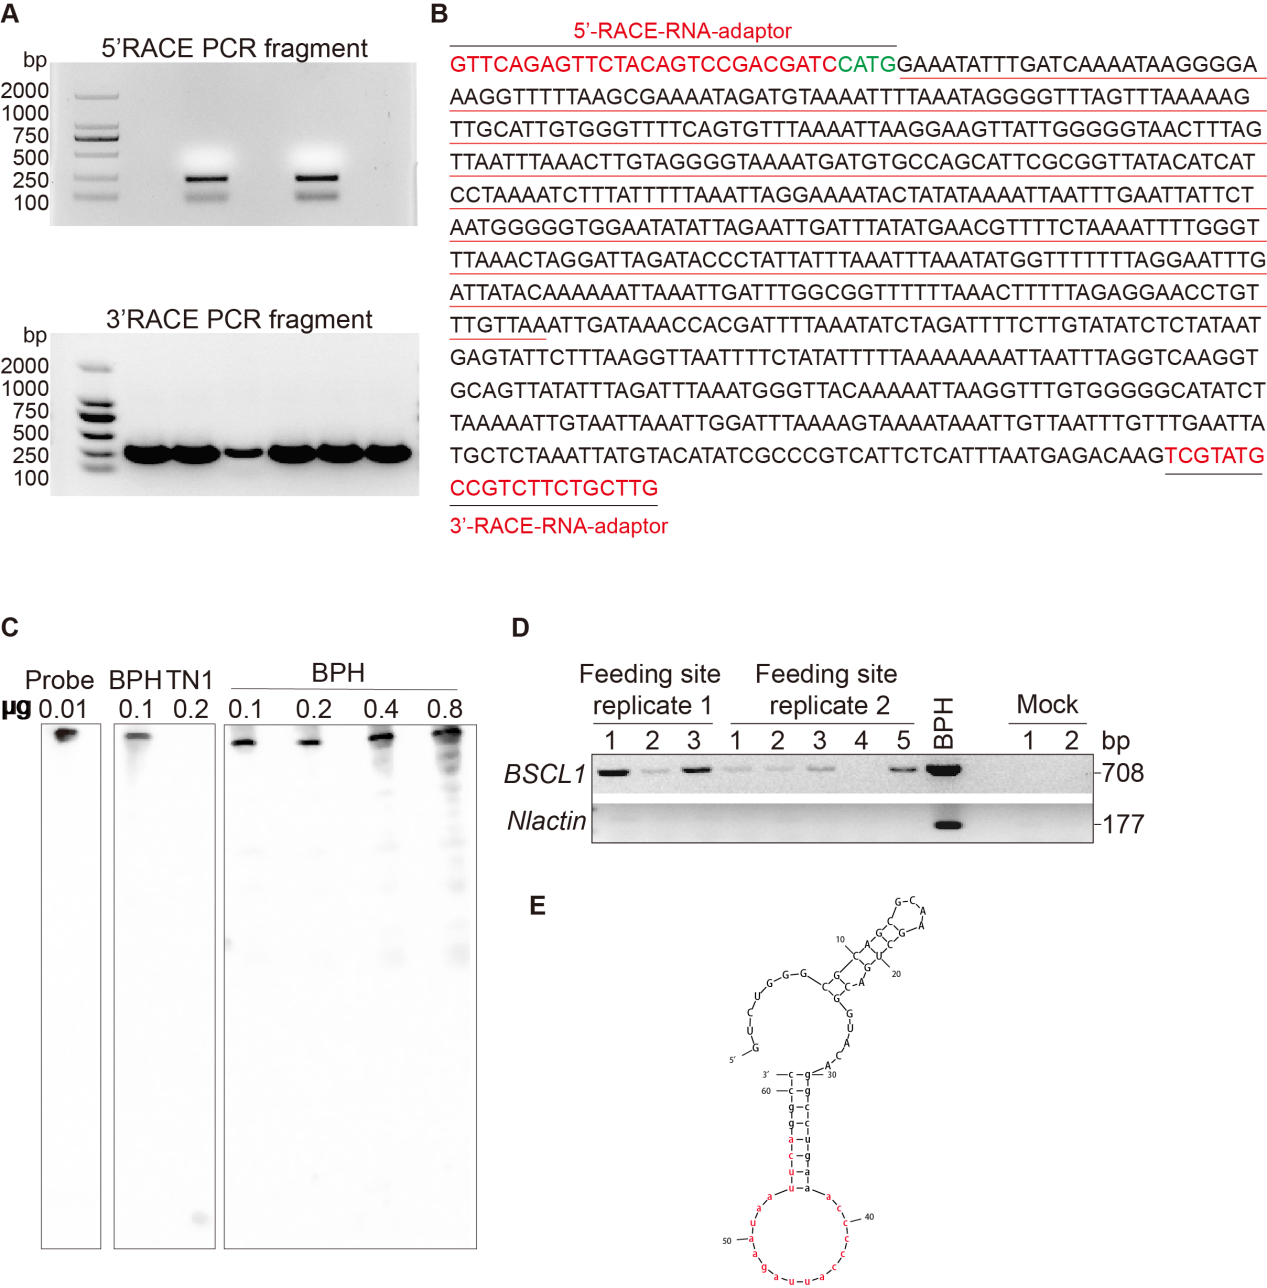


**Supplementary Figure 5** | ***BSCL1* is secreted into rice in the form of full-length transcripts.** (A) Results of a 5’ and 3’ RACE experiment. The PCR products were separated on a 2% agarose gel, and the target bands were excised, purified, and sequenced. The resulting sequences were then assembled with the predicted *BSCL1* sequence. (B) Sequence of the *BSCL1* full-length cDNA. The sequences marked in red at both ends represent 5’ and 3’ RNA adapter sequences, respectively. The sequence underlined in red corresponds to the annotated *BSCL1* sequence, and the sequence downstream of its 3’ end was obtained from the 3’ RACE experiment. (C) Northern blot hybridizations with full length *BSCL1* probe showing no obvious short fragment in BPH RNAs. (D) Full-length transcript of *BSCL1* was detected in FS via RT-PCR. Numbers above the gel image were the number of samples used in each replicate. (E) The secondary structure of RNA-switch was designed for targeting of *BSCL1*. The sequences marked in red represent the probe specifically binding to *BSCL1* (Predicted free energy: dG = -21.70 kcal/mol), and the design principles and screening criteria of the RNA-switch are described in the Methods section.


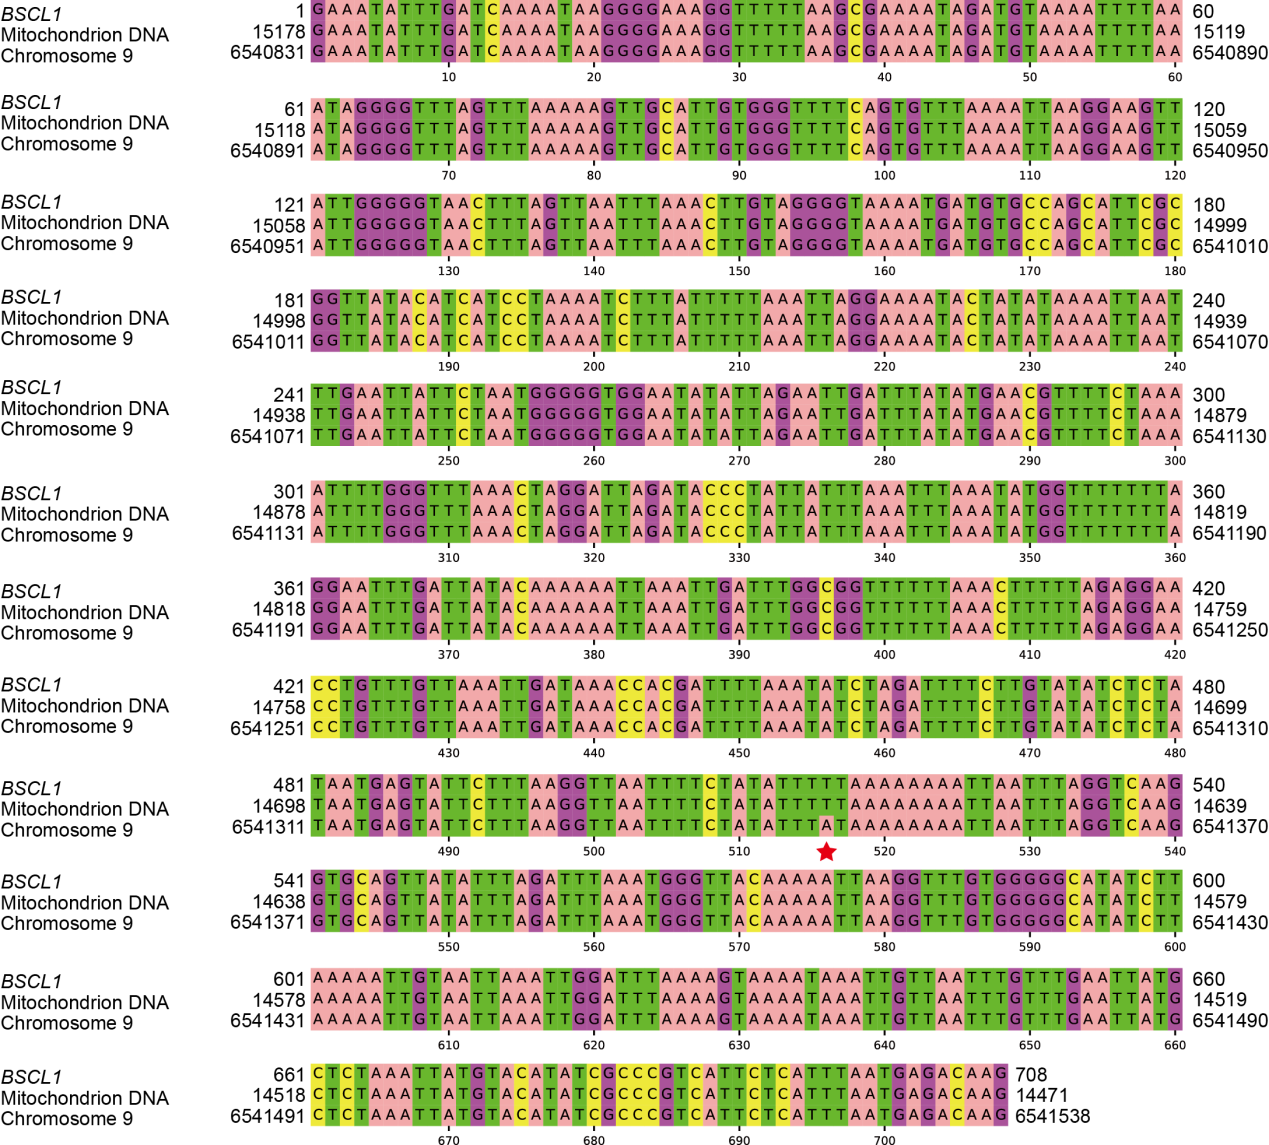


**Supplementary Figure 6** | **Multiple sequence comparison among the *BSCL1* sequence, mitochondrial genomic DNA, and chromosome 9 sequence of the BPH**


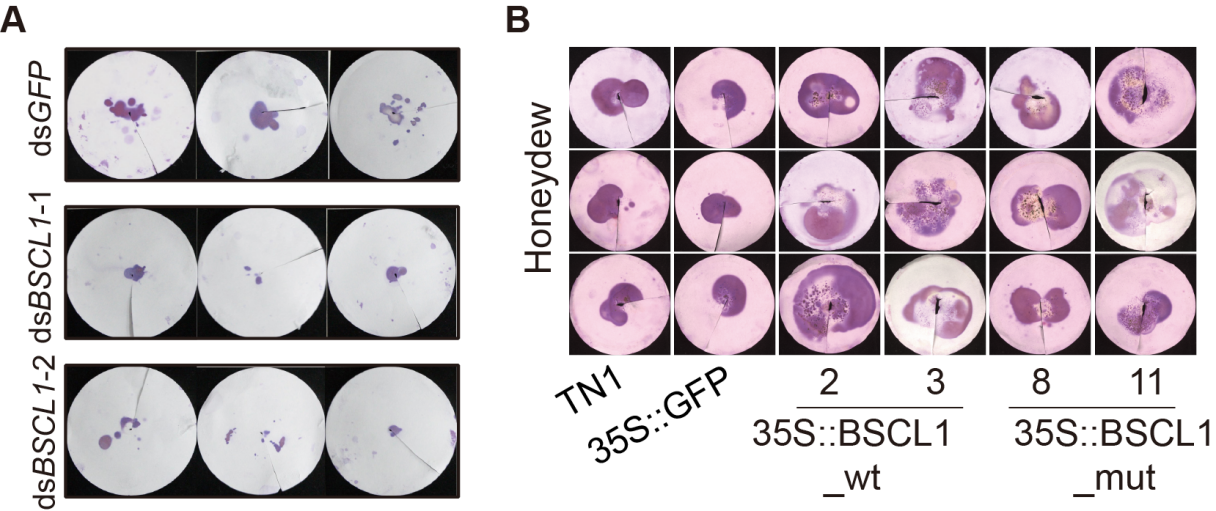


**Supplementary Figure 7** | **Detection of brown planthopper honeydew secretion after *BSCL1* interference (A) and after feeding on different rice lines (B).**


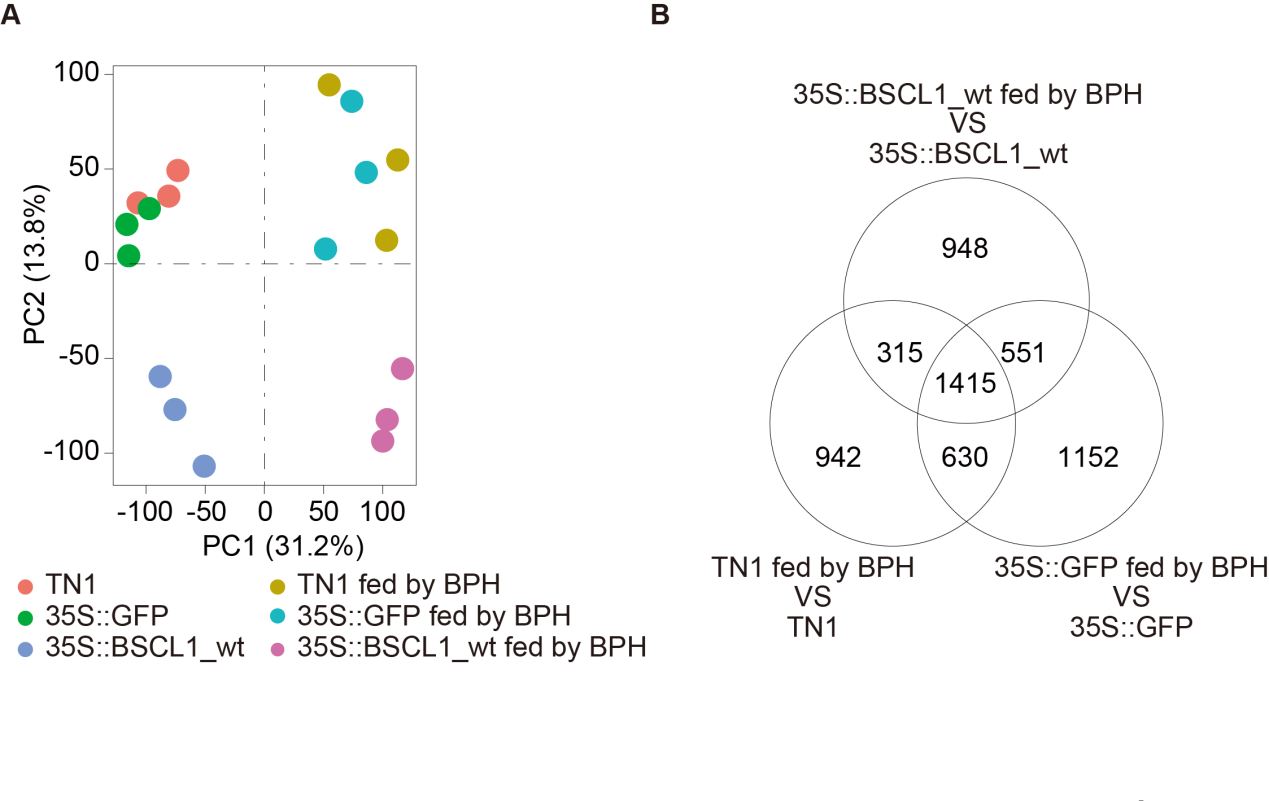


**Supplementary Figure 8** | ***BSCL1*-overexpressing rice shows a distinct gene expression pattern from TN1 and GFP-overexpressing rice.** (A) PCA of RNA-seq data reveals distinct clustering of rice lines with or without 24 h BPH feeding. Three biological replicates were included. PC1 and PC2 represent the first and second principal components. (B) Venn diagram showing the numbers of DEGs among different rice lines with or without 24 h BPH feeding.


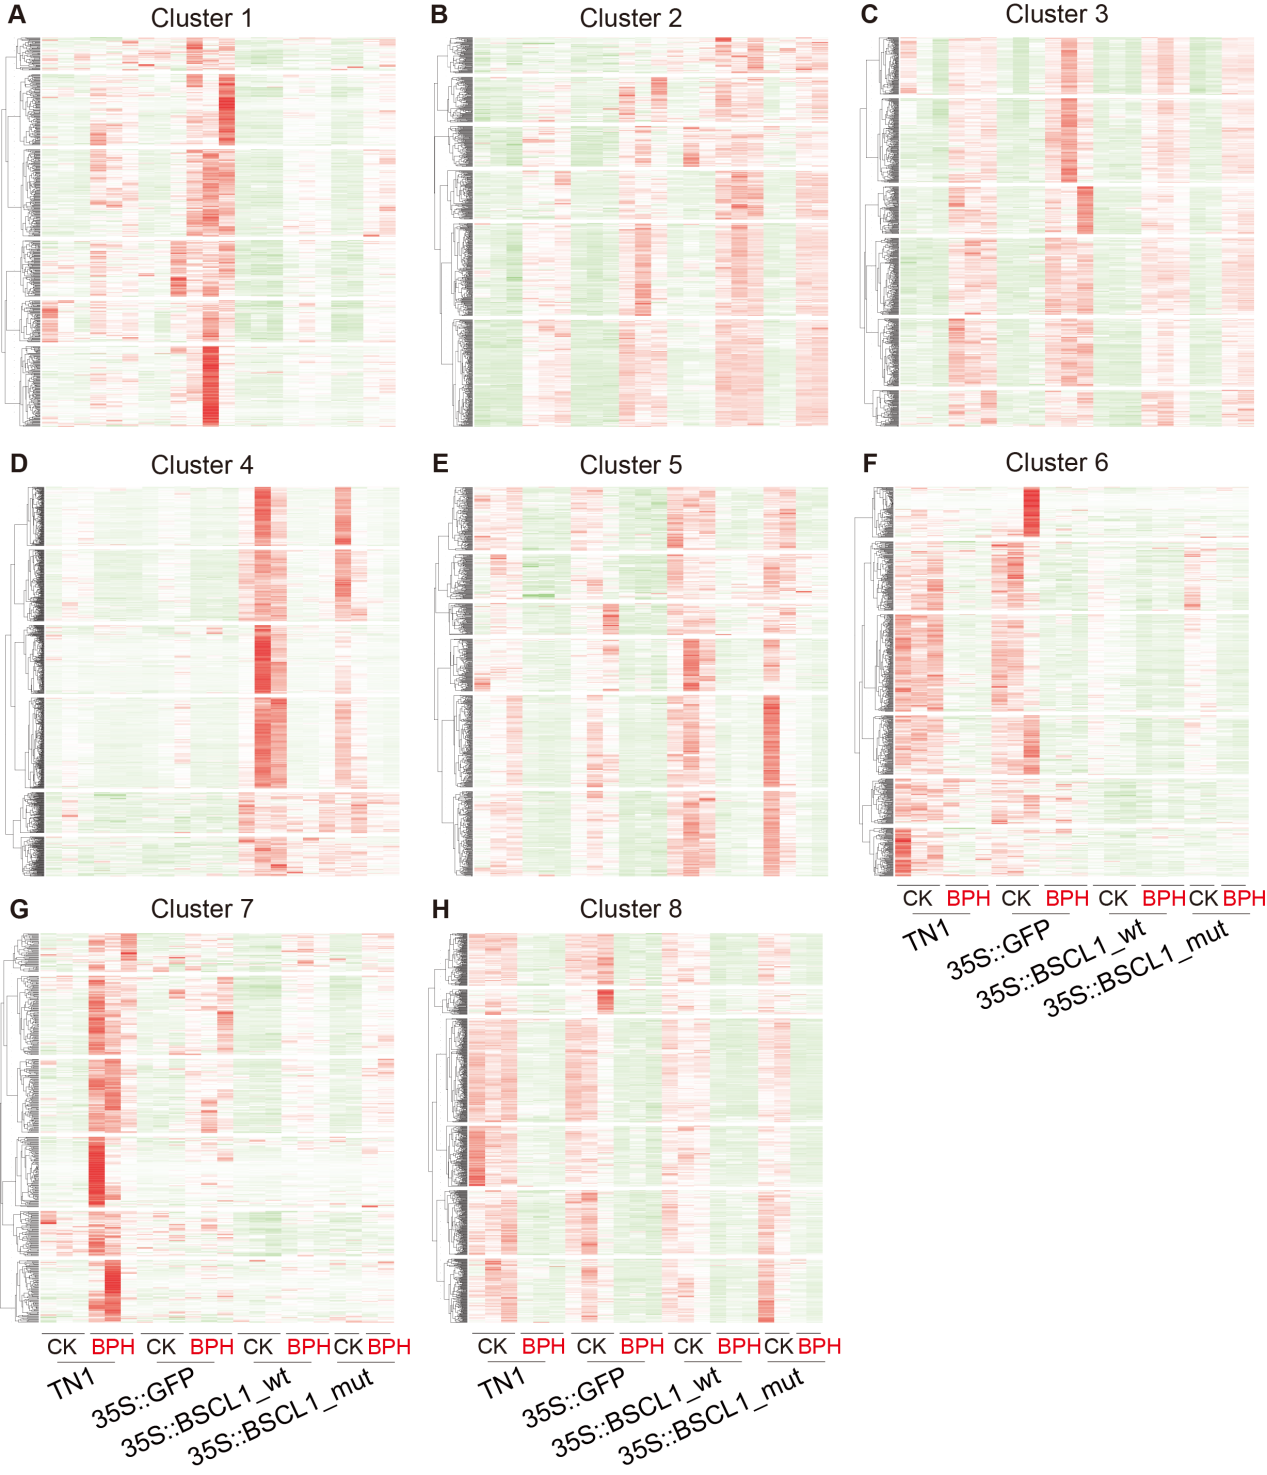


**Supplementary Figure 9** | **Heatmap of TPM values for DE genes in the clusters**. Coexpression patterns DE genes in the clusters were shown in Fig. 5A. CK, uninfested plants; BPH, plants infested by BPH. All of the DE genes from different clusters are listed in Supplementary data 5.


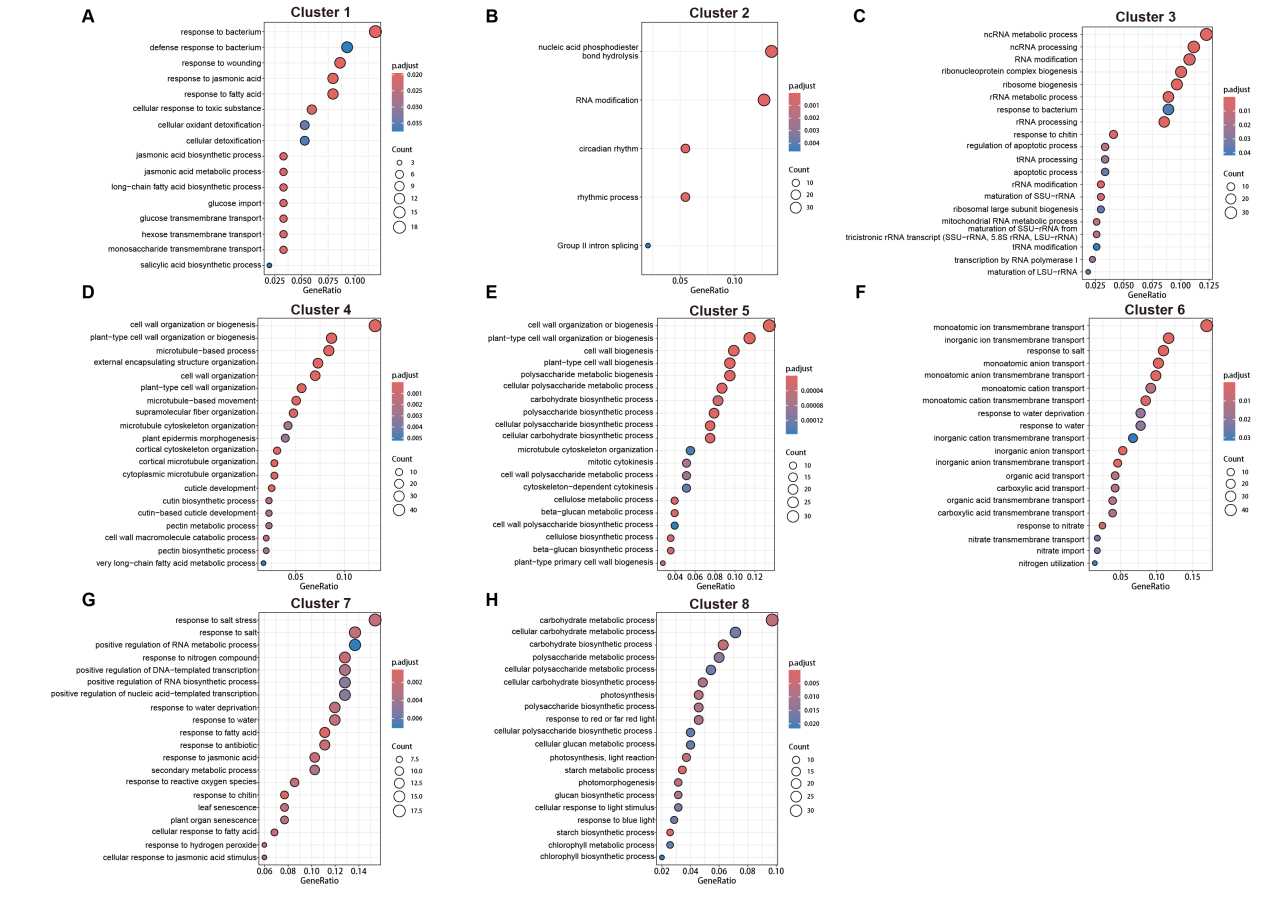


**Supplementary Figure 10** | **GO enrichment analysis of the eight DE gene clusters.** Coexpression patterns DE genes in the clusters were shown in Fig. 5*A*. Each cluster was analyzed separately to identify significantly enriched GO terms. All DE genes from the clusters are listed in Supplementary data 5.


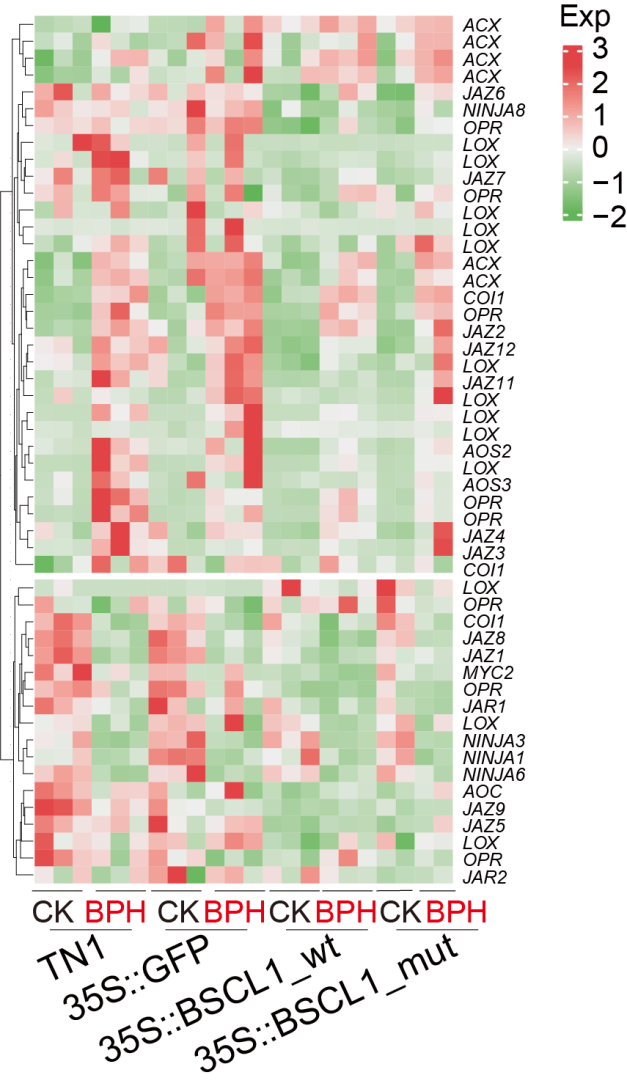


**Supplementary Figure 11** | **Heatmap of TPM values for genes involved in the JA pathway.** CK, uninfested plants; BPH, plants infested by BPH.


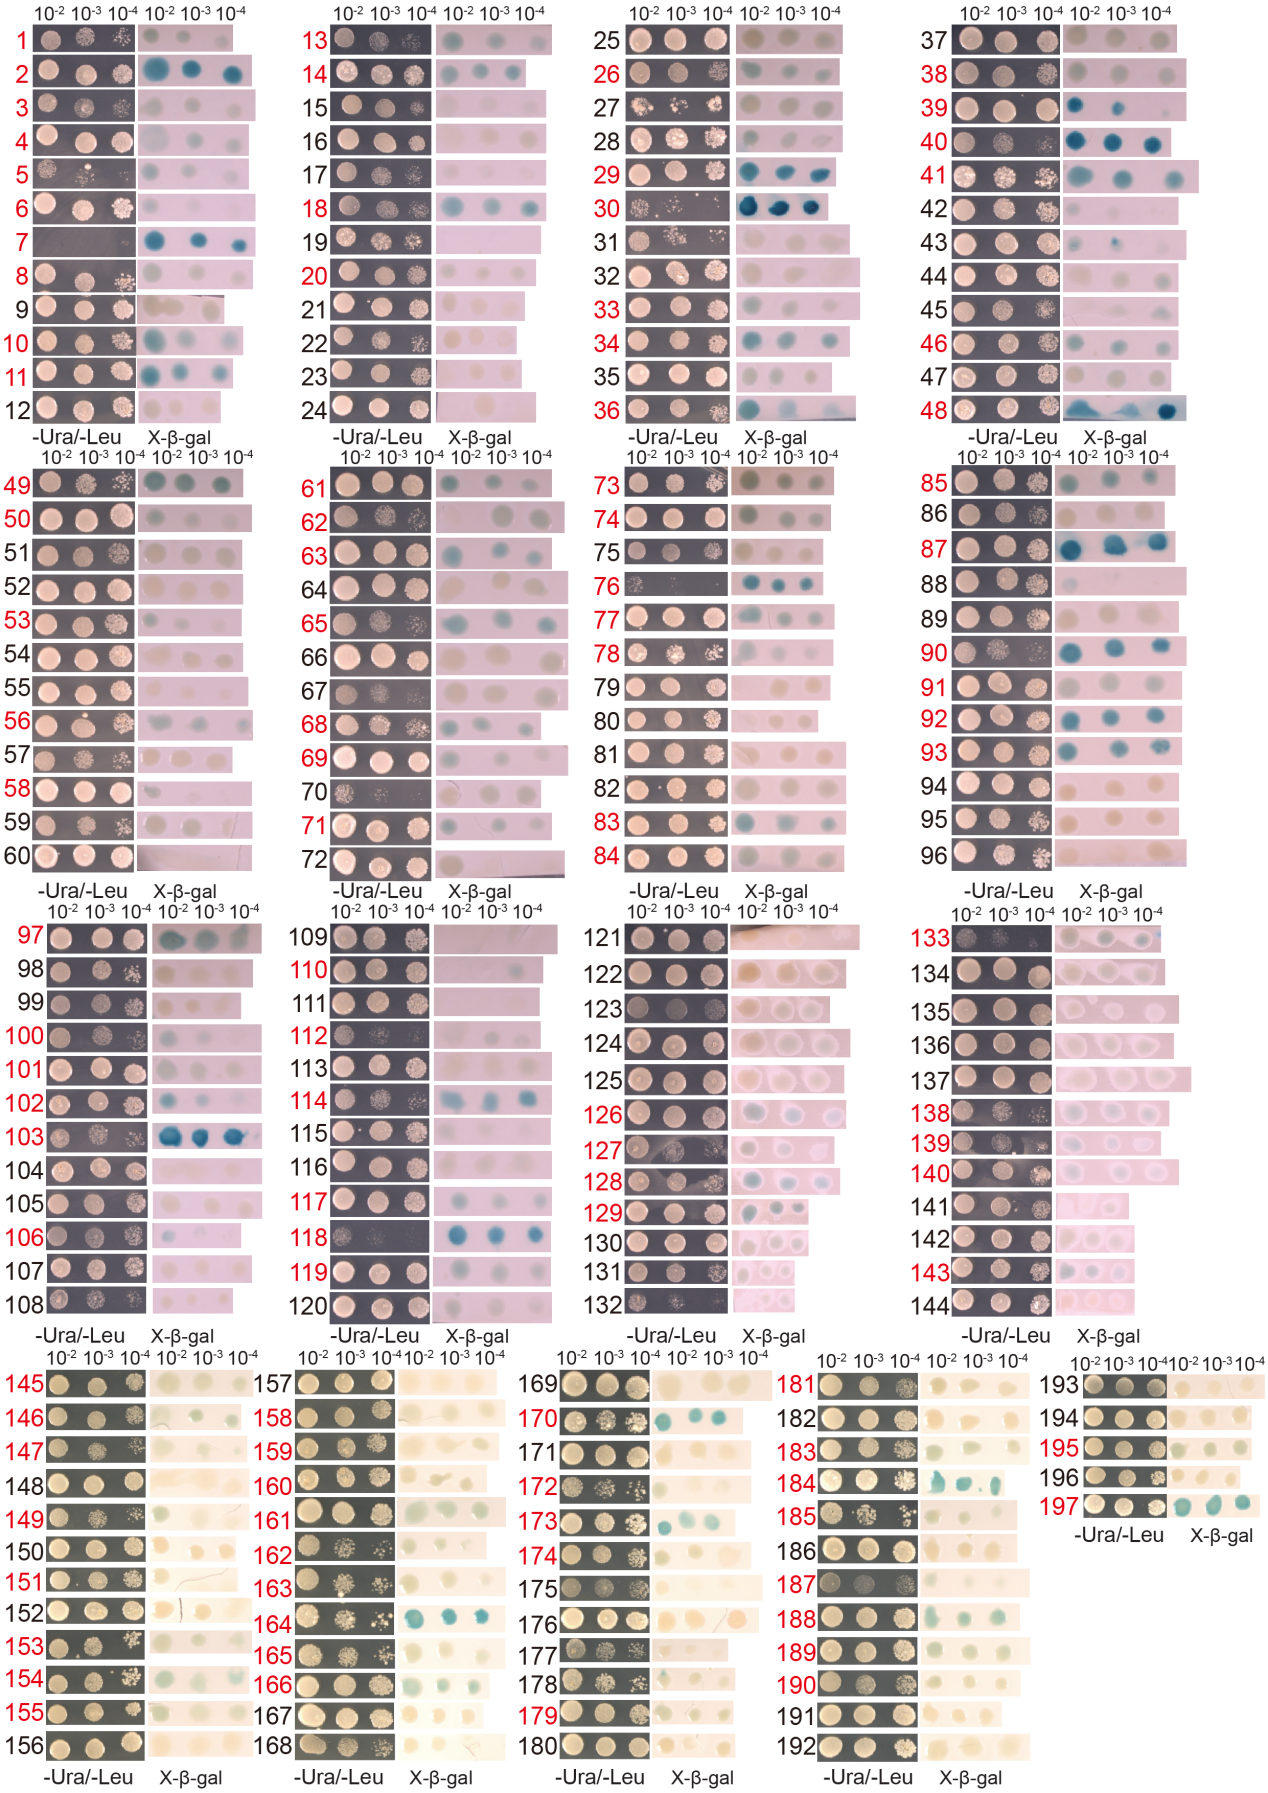


**Supplementary Figure 12** | **Yeast three-hybrid screening for *BSCL1*-interacting proteins in rice.** The obtained monoclonal colonies were diluted 100-, 1000-, and 10,000-fold, respectively, and cultured on SD-U-L medium followed by LacZ reporter assay (For details, please refer to the Materials and Methods section). The red-labeled numbers indicate candidate positive colonies that turned blue in the X-β-gal screening.

**Supplementary Table 1.**

List of RNA-seq data used for BPH lncRNA identification

| Samples | Total reads | Mapped reads | Percentage of mapped reads (%) | Reference |
| --- | --- | --- | --- | --- |
| SRR8437756 | 19,606,243 | 16,309,706 | 83.19 | (1) |
| SRR8437757 | 20,496,407 | 16,971,025 | 82.80 |
| SRR8437758 | 22,246,711 | 18,222,281 | 81.91 |
| SRR8437759 | 20,088,099 | 16,522,461 | 82.25 |
| SRR8437760 | 20,117,154 | 16,968,819 | 84.35 |
| SRR8437761 | 18,622,509 | 15,544,208 | 83.47 |
| SRR8437762 | 23,106,681 | 19,393,437 | 83.93 |
| SRR8437763 | 20,080,714 | 16,946,114 | 84.39 |
| SRR35242192 | 23,556,002 | 19,794,108 | 84.03 | this study |
| SRR35242191 | 24,221,424 | 20,280,598 | 83.73 |
| SRR35242190 | 24,302,276 | 20,535,423 | 84.50 |

**Supplementary Table 2. BPH-delivered mRNAs detected in feeding sites**

The samples from different replicates were consistent with the Supplementary data 2

| Gene_id | Reads | Describe | BPH_1_FS | BPH_2_FS | BPH_3_FS |
| --- | --- | --- | --- | --- | --- |
| *Nlug010593* | 10 | Elongation factor 1-alpha 2 | √ | √ | √ |
| *Nlug002054* | 6 | Heat shock 70 kDa protein cognate 4 | √ | √ | √ |
| *Nlug010579* | 4 | Soma ferritin | √ | √ | √ |
| *Nlug013388* | 21 | Fatty acid synthase | √ | √ | √ |
| *Nlug009012* | 18 | Actin-5C | √ | √ | √ |
| *Nlug014903* | 7 | 60S acidic ribosomal protein P0 | √ | √ | √ |
| *Nlug015173* | 4 | Elongation factor 1-gamma | √ | √ | √ |
| *Nlug016826* | 4 | Putative uncharacterized protein | √ | √ | √ |
| *Nlug008639* | 4 | Probable transaldolase | √ | √ | √ |
| *Nlug005666* | 2 | 40S ribosomal protein S3a | √ | √ | √ |
| *Nlug016827* | 2 | Putative uncharacterized protein | √ | √ | √ |
| *Nlug012522* | 2 | Putative uncharacterized protein | √ | √ | √ |

**Supplementary Table 3. List of enriched genes from transcription factors WRKY and bHLH families in clusters 1, 7, 3, and 6**

| Gene_id | Gene_name | Cluster |
| --- | --- | --- |
| *OsTN11t000130* | *WRKY70* | Cluster1 |
| *OsTN11t000133* | *WRKY70* | Cluster1 |
| *OsTN11t000134* | *WRKY27* | Cluster1 |
| *OsTN11t001671* | *WRKY72* | Cluster1 |
| *OsTN12t000123* | *WRKY63* | Cluster1 |
| *OsTN12t000129* | *WRKY72* | Cluster1 |
| *OsTN1t001354* | *WRKY5* | Cluster1 |
| *OsTN1t003729* | *WRKY19* | Cluster1 |
| *OsTN5t000974* | *WRKY70* | Cluster1 |
| *OsTN5t002233* | *WRKY55* | Cluster1 |
| *OsTN5t002805* | *WRKY23* | Cluster1 |
| *OsTN9t001168* | *WRKY76* | Cluster1 |
| *OsTN9t001169* | *WRKY62* | Cluster1 |
| *OsTN1t000645* | *WRKY72* | Cluster7 |
| *OsTN1t000646* | *WRKY50* | Cluster7 |
| *OsTN1t002732* | *WRKY16* | Cluster7 |
| *OsTN1t003730* | *WRKY45* | Cluster7 |
| *OsTN1t003764* | *WRKY24* | Cluster7 |
| *OsTN2t000659* | *WRKY71* | Cluster7 |
| *OsTN4t000802* | *WRKY51* | Cluster7 |
| *OsTN5t001375* | *WRKY45* | Cluster7 |
| *OsTN6t002598* | *WRKY28* | Cluster7 |
| *OsTN8t000571* | *ZBED* | Cluster7 |
| *OsTN8t001365* | *WRKY19* | Cluster7 |
| *OsTN9t000735* | *WRKY74* | Cluster7 |
| *OsTN1g002190* | *bHLH041* | Cluster3 |
| *OsTN10g001009* | *bHLH96* | Cluster6 |
| *OsTN12g002074* | *PIF13* | Cluster6 |
| *OsTN1g002203* | *R-S PROTEIN* | Cluster6 |
| *OsTN1g002983* | *bHLH13* | Cluster6 |
| *OsTN1g004238* | *bHLH128* | Cluster6 |
| *OsTN2g003177* | *bHLH79* | Cluster6 |
| *OsTN2g003535* | *bHLH94* | Cluster6 |
| *OsTN4g000845* | *bHLH6* | Cluster6 |
| *OsTN8g002021* | *bHLH130* | Cluster6 |
| *OsTN9g001166* | *RHL1* | Cluster6 |
| *OsTN9g001610* | *bHLH130* | Cluster6 |
| *OsTN9g001682* | *bHLH089* | Cluster6 |

**Supplementary Table 4. Statistics on the number of monoclonal colonies for each potential *BSCL1*-interacting protein.**

**The raw data of screened out monoclonal colonies via yeast three-hybrid are listed in Supplementary data 6.**

| Description | Colonies | | Gene ID |
| --- | --- | --- | --- |
| vacuolar protein sorting-associated protein 2 homolog 2 | | 23 | *OsTN3g002887* |
| histone H3.3-like | | 18 | *OsTN4g001772* |
| transcription factor RF2a-like | | 14 | *OsTN4g002071* |
| ribonuclease J isoform X1 | | 7 | *OsTN2g002166* |
| U-box domain-containing protein 70 | | 6 | *OsTN6g000453* |
| HIRA-interacting protein 3 | | 5 | *OsTN11g001883* |
| T-complex protein 1 subunit gamma | | 3 | *OsTN6g002026* |
| Ustilaginoidea virens uncharacterized protein (UV8b_06348) | | 3 | *XM_043143845.1* |
| DDT domain-containing protein PTM-like | | 2 | *OsTN11g000358* |
| Core-2/I-branching beta-16-N-acetylglucosaminyltransferase family protein | | 2 | *OsTN11g001122* |
| Core-2/I-branching beta-16-N-acetylglucosaminyltransferase family protein | | 1 | *OsTN2g000610* |
| hexokinase-5 | | 1 | *OsTN5g002404* |
| MAPK activating protein-like | | 1 | *OsTN1g002988* |
| FAR1-RELATED SEQUENCE 5 | | 1 | *LOC4335561* |
| arabinosyltransferase RRA3 | | 1 | *OsTN7g002207* |
| plastidial pyruvate kinase 2 | | 1 | *OsTN1g002697* |
| riboflavin biosynthesis protein PYRD, chloroplastic | | 1 | *OsTN3g000137* |
| ATP synthase CF1 alpha subunit (chloroplast) | | 1 | *OsTN3g003185* |
| C2 and GRAM domain-containing protein | | 1 | *OsTN2g000810* |
| chromatin complex subunit A | | 1 | *OsTN5g000380* |
| ER membrane protein complex subunit 1 | | 1 | *OsTN5g000961* |
| F-box domain containing protein | | 1 | *OsTN11g001484* |
| hydroxyproline-rich glycoprotein-like | | 1 | *OsTN6g000701* |
| kinesin-like protein KCA2 | | 1 | *OsTN6g000798* |
| PHD zinc finger protein-like | | 1 | *OsTN6g000001* |
| profilin A like | | 1 | *OsTN10g000788* |
| probable sugar phosphate/phosphate translocator At3g14410 | | 1 | *OsTN8g000198* |
| replication protein A 70 kDa DNA-binding subunit B-like isoform X3 | | 1 | *OsTN1g003882* |
| glutamine--tRNA ligase | | 1 | *OsTN1g000641* |
| Ustilaginoidea virens uncharacterized protein (UV8b_05025) | | 1 | *XM_043142523.1* |
| Ustilaginoidea virens uncharacterized protein (UV8b_02131) | | 1 | *XM_043139629.1* |

**Supplementary Table 5. Genome data source of 28 species used in Evolinc Ⅱ analysis**

| Species | Order | family | Genus | Common name | Source |
| --- | --- | --- | --- | --- | --- |
| *Tetranychus urticae* | Trombidiformes | Tetranychidae | Tetranychus | Red spider mite | GRBI |
| *Atta cephalotes* | Hymenoptera | Formicidae | Atta | Leaf cutter ant | GCF_000143395.1 |
| *Tribolium castaneum* | Coleoptera | Tenebrionidae | Tribolium | Red flour beetle | GCF_031307605.1 |
| *Drosophila melanogaster* | Diptera | Drosophilidae | Drosophila | Fruit fly | GCF_000001215.4 |
| *Aedes aegypti* | Diptera | Culicidae | Aedes | yellow fever mosquito | GCF_002204515.2 |
| *Daktulosphaira vitifoliae* | Hemiptera | Phylloxeridae | Daktulosphaira | Phylloxera | Aphid Base |
| *Myzus persicae* | Hemiptera | Aphididae | Myzus | green peach aphid | (2) |
| *Sitobion avenae* | Hemiptera | Aphididae | Sitobion |  | (3) |
| *Acyrthosiphon pisum* | Hemiptera | Aphididae | Acyrthosiphon | Pea aphid | (4) |
| *Brevicoryne brassicae* | Hemiptera | Aphididae | Brevicoryne | cabbage aphid | (5) |
| *Diuraphis noxia* | Hemiptera | Aphididae | Diuraphis | Russian wheat aphid | (5) |
| *Rhopalosiphum padi* | Hemiptera | Aphididae | Rhopalosiphum | Bird cherry-oat aphid | (5) |
| *Rhopalosiphum maidis* | Hemiptera | Aphididae | Rhopalosiphum | corn leaf aphid | (6) |
| *Aphis fabae* | Hemiptera | Aphididae | Aphis | black bean aphid | (5) |
| *Aphis gossypii* | Hemiptera | Aphididae | Aphis | cotton aphid | (5) |
| *Aphis glycines* | Hemiptera | Aphididae | Aphis | Soybean aphid | (7) |
| *Melanaphis sacchari* | Hemiptera | Aphididae | Aphis | sugarcane aphid | GCF_002803265.2 |
| *Bemisia tabaci* | Hemiptera | Aleyrodidae | Bemisia | Whitefly | GCF_001854935.1 |
| *Laodelphax striatellus* | Hemiptera | Delphacidae | Laodelphax | small brown planthopper | (8) |
| *Sogatella furcifera* | Hemiptera | Delphacidae | Sogatella | White-backed planthopper | (8) |
| *Nilaparvata lugens* | Hemiptera | Delphacidae | Nilaparvata | Brown planthopper | (8) |
| *Nesidiocoris tenuis* | Hemiptera | Miridae | Nesidiocoris |  | GCA_036186465.1 |
| *Rhodnius prolixus* | Hemiptera | Reduviidae | Rhodnius |  | (9) |
| *Oncopeltus fasciatus* | Hemiptera | Lygaeidae | Oncopeltus | Large Milkweed Bug | (10) |
| *Frankliniella occidentalis* | Thysanoptera | Thripidae | Frankliniella | western flower thrips | (11) |
| *Daphnia pulex* | Cladocera | Daphniidae | Daphnia | Water flea | GCA_000187875.1 |
| *Pachypsylla venusta* | Hemiptera | Psyllidae | Pachypsyllinae |  | GCA_012654025.1 |
| *Plutella xylostella* | Lepidoptera | Plutellidae | Plutella | Diamondback moth | GCF_000330985.1 |

**Supplementary Table 6. Primers used in this study**

| Primers | Sequence (5'→3') | Purpose |
| --- | --- | --- |
| qNlug010593-F | TCATCGTCGGAGTCAACA | qRT-PCR for Nlug010593 |
| qNlug010593-R | GAACCAGGGCATCTTGTC |
| qNlug002054-F | GAACTCTGTCCTCATCCA | qRT-PCR for Nlug002054 |
| qNlug002054-R | ATCTGTGACTTATCCATCTTG |
| qBSCL1-F | GCATTGTGGGTTTTCAGTGT | qRT-PCR for BSCL1 |
| qBSCL1-R | GCACATCATTTTACCCCTACAA |
| qBSCL2-F | AGGAAAGAGCCATAGTAAATTC | qRT-PCR for BSCL2 |
| qBSCL2-R | TCATATCACCCGAGATGTAAA |
| Nlug010593-P1 | GCTGATTGCGCCGTGTTGA | Transcript length detection for Nlug010593 |
| Nlug010593-P2 | TGATTGTTGCCGCTGGTA |
| Nlug010593-P3 | TCATCGTCGGAGTCAACA |
| Nlug010593-P4 | TTAAGTACACACCTTGATAACACC |
| Nlug010593-P5 | CAACTCCTTGACGGAGACGT |
| Nlug010593-P6 | GAACCAGGGCATCTTGTC |
| Nlug002054-P1 | ATGGCCGCCAAAGCACCA | Transcript length detection for Nlug002054 |
| Nlug002054-P2 | AGATGCCGCCAAGAATCAGGT |
| Nlug002054-P3 | GAACTCTGTCCTCATCCA |
| Nlug002054-P4 | TTAGTCGACTTCTTCGATGGTTG |
| Nlug002054-P5 | TCCAAGATGGCGGTCTTGTCA |
| Nlug002054-P6 | AGTCTGCTTGGTTGGAATG |
| Nlug002054-P7 | ATCTGTGACTTATCCATCTTG |
| pB7WG2-F | actattctagtcgacctgcag | Primers used for sequencing detection of the inserted sequence |
| pB7WG2-R | gatctcgaactcgtggcc |
| mcherry-H3.3-F | ctgcaggcggccgcactagtATGGATGGCGCACAGGTTG | Primers used for the construction of the H3.3–mCherry fusion protein |
| mcherry-H3.3-R | aagaaagctgGGTGCTCGAGATTGCCAAGGCTGCTCGT |
| mherry-HIRIP3-F | ctgcaggcggccgcactagtATGGAGCCCGACGCCGCAGC | Primers used for the construction of the HIRIP3–mCherry fusion protein |
| mherry-HIRIP3-R | aagaaagctgGGTGCTCGAGATCACTGTCGTGCTCAGCA |
| p3HR2-M13F | GTAAAACGACGGCCAGT | Primers used for sequencing detection of the inserted sequence |
| p3HR2-M13R | CAGGAAACAGCTATGAC |
| p3HR2-BSCL1-F | tcccccggcgcccggcggctcgagGAAATATTTGATCAAAATAAGG | Primers used for the construction of the BSCL1 expression plasmid |
| p3HR2-BSCL1-R | CCGGCGGCATGCAAGCTGCCCGGGCTTGTCTCATTAAATGAGAATG |
| His3.3-F | ATGGATGGCGCACAGGTT | Primers used for the full length CDS amplication of His3.3 |
| His3.3-R | TCAATTGCCAAGGCTGCTC |
| HIRIP3-F | ATGGAGCCCGACGCCGCAGC | Primers used for the full length CDS amplication of HIRIP3 |
| HIRIP3-R | TTAGAAACCGCAAGAATCAATC |
| GA-His3.3-F | GGAGGCCAGTGAATTCATGGATGGCGCACAGGTT | Primers used for the construction of the His3.3 expression plasmid |
| GA-His3.3-R | CGAGCTCGATGGATCCTCAATTGCCAAGGCTGCTC |
| GA-HIRIP3-F | GGAGGCCAGTGAATTCATGGAGCCCGACGCCGCAGC | Primers used for the construction of the HIRIP3 expression plasmid |
| GA-HIRIP3-R | CGAGCTCGATGGATCCTTAGAAACCGCAAGAATCAATC |
| bHLH6-F | atgaatcgtgttgtgtttatac | Primers used for promoter amplication of bHLH6 |
| bHLH6-R | ggaagttatgctatagtcgta |
| PG800-bHLH6-F | CGGTATCGATAAGCTTatgaatcgtgttgtgtttatac | Primers used for the construction of the reporter plasmid |
| PG800-bHLH6-R | ATCCCCCGGGCTGCAGggaagttatgctatagtcgta |
| PG62-BSCL1-F | TGGCGGCCGCTCTAGAGAAATATTTGATCAAAATAAGGGGA | Primers used for the construction of the BSCL1 expression plasmid |
| PG62-BSCL1-R | ACGGTATCGATAAGCTTCTTGTCTCATTAAATGAGAATG |
| pG62-gfp-F | TGGCGGCCGCTCTAGACACAAGTTCAGCGTGTCC | Primers used for the construction of the nonsense gfp expression plasmid |
| pG62-gfp-R | ACGGTATCGATAAGCTTGTTCACCTTGATGCCGT |
| PG62-HIRIP3-F | TGGCGGCCGCTCTAGAATGGAGCCCGACGCCGCAGC | Primers used for the construction of the HIRIP3 expression plasmid |
| PG62-HIRIP3-R | CGGTATCGATAAGCTTTTAGAAACCGCAAGAATCAATC |
| PG62-His3.3-F | ACCGCGGTGGCGGCCGCTCTAGAATGGATGGCGCACAGGTT | Primers used for the construction of the His3.3 expression plasmid |
| PG62-His3.3-R | GAGGTCGACGGTATCGATAAGCTTTCAATTGCCAAGGCTGCT |
| RNA swtich-BSCL1-F1 | GGGCGCAGCGCAAGCTGACGGTACAGGCCtgaaaccccca | Primers used for the construction of the BSCL1 RNA-switch expression plasmid GGTCTGGGCGCAGCGCAAGCTGACGGTACAGGCCtgaaacccccattagaataattcaggcc |
| RNA swtich-BSCL1-R1 | aCTAGTggcctgaattattctaatgggggtttcaGGCCTGTACCG |
| RNA swtich-BSCL1-F2 | tagagtcgaagtagtgattGGATCCGGTCTGGGCGCAGCGCAAGCTGAC |
| RNA swtich-BSCL1-R2 | ggcccttcgaagggacaaaaaaaCTAGTggcctgaattattctaatgggg |
| PC-BSCL1-F | agctttcgcgagctcgGAAATATTTGATCAAAATAAGG | Primers used for the construction of the BSCL1_wt or BSCL1_mut expression plasmid |
| PC-BSCL1-R | atgcctgcaggtcgactCTTGTCTCATTAAATGAGAATG |
| BSCL1-ATG-164F | AATTTAAACTTGTAGGGGTAAAATGTAGTGCCAGCATTCGCGGTT |
| BSCL1-ATG-164R | AACCGCGAATGCTGGCACTACATTTTACCCCTACAAGTTTAAATT |
| BSCL1-ATG-253F | ATTAATTTGAATTATTCTATAGGGGGTGGAATATATTAGAAT |
| BSCL1-ATG-253R | ATTCTAATATATTCCACCCCCTATAGAATAATTCAAATTAAT |
| PC-GFP-F | agctttcgcgagctcgATGGTGAGCAAGGGCGAGG |  |
| PC-GFP-R | atgcctgcaggtcgactTTACTTGTACAGCTCGTCC |  |
| Nlug009012-F1 | GAGTAATGGTCGGTATGG | Primers used for the detection of cross-kingdom mRNAs in feeding site |
| Nlug009012-R1 | CGTTGTAGAAGGTGTGAT |
| Nlug012444-F1 | CCTGCCGTAAGGAACTTC |
| Nlug012444-R1 | GATCAGTGAGCCGAACAC |
| Nlug015158-F1 | CATTGAGGAATCTGGAGAACAT |
| Nlug015158-R1 | CTGGTCGGACTCTTCACT |
| Nlug010593-F1 | TGATTGTTGCCGCTGGTA |
| Nlug010593-R1 | TTGTTGACTCCGACGATGA |
| Nlug002054-F1 | GAACTCTGTCCTCATCCA |
| Nlug002054-R1 | ATCTGTGACTTATCCATCTTG |
| Nlug013388-F1 | TACAATCCAGTCAAGTTCC |
| Nlug013388-R1 | GTTCTCCATACAAGAGTCAA |
| Nlug010579-F1 | CTATGTCTGCTGCCTTAC |
| Nlug010579-R1 | CTCCTTGAGTTCCTTATCG |
| BSCL1-F | AATGATGTGCCAGCATTCGC | Primers used for the detection of cross-kingdom lncRNAs in feeding site |
| BSCL1-R | ggTATCTAATCCTAGTTTAAACCCA |
| BSCL2-F | AGGAAAGAGCCATAGTAAATTC |
| BSCL2-R | TCATATCACCCGAGATGTAAA |
| BSCL3-F | ATACCACGACGATACTCTG |
| BSCL3-R | ATTCATTACACTATTCTGCCATA |
| BSCL4-F | GAGATTCAAGTTAGTCAGTGG |
| BSCL4-R | AAGGAACATCAGGCTTACA |
| BSCL5-F | TGATAGTTCTGATTCGTATTCTG |
| BSCL5-R | TTTACTATTTGGACGGACATTT |
| BSCL6-F | CTCGCCATCGCTGTCATA |
| BSCL6-R | TGTCTGCTGTTCATTATGTTGAT |
| BSCL7-F | TCTTCATCAACCTATTTCATCAG |
| BSCL7-R | TGCTTTCACTACCCACTT |
| BSCL8-F | AGAGACTAAGAGATGAGTTAATGC |
| BSCL8-R | TTTGACTATTAGATAGCCTTGGG |
| BSCL9-F | TGACAGCGGAGTAGTGACA |
| BSCL9-R | GGCGTTATCCTATTGCTCTATTCA |
| BSCL10-F | CCTTACAGACATTGATCATTCCGA |
| BSCL10-R | CAAGAATATGAGGGAATCATTCCG |
| BSCL11-F | AATAGTCCGTGCCAGTTGAATAG |
| BSCL11-R | GCTCCAATGACCACACCATAA |
| Os18S-F | agtgtctggtaattggaatgag |
| Os18S-R | tgtcaatccttgctatgtctg |
| Nlactin-F | aaccaccgctgagcgtgaaa |
| Nlactin-R | gcttctgggcaacggaacct |
| qNlactin-F | atgtgtgacgaagaagcagg | Primers used as reference genes for qRT-PCR |
| qNlactin-R | acccataccgaccatcacac |
| qOs18S-F | atgataactcgacggatcgc |
| qOs18S-R | cttggatgtggtagccgttt |
| 5' RNA Adapter | 5' GUUCAGAGUUCUACAGUCCGACGAUCNNNN (The four Ns are barcode to get rid of the PCR duplication) | RNA Adapter sequence of 5' end |
| 3' RNA Adapter | 5' P-UCGUAUGCCGUCUUCUGCUUGUidT | RNA Adapter sequence of 3' end |
| 3'RACE-RT | CAAGCAGAAGACGGCATACGA | Reverse transcription primer for 3' RACE |
| 5'RACE-RT | AATGATACGGCGACCACCGACAGGTTCAGAGTTCTACAGTCCGA | Reverse transcription primer for 5' RACE |
| BSCL1-5'race-R | CACTGAAAACCCACAATGCAACT | PCR primer for 5' RACE |
| BSCL1-3'race-F | GCATTCGCGGTTATACATCATCC | PCR primer for 3' RACE |
| qBSCL1-F1 | ATTGTGGGTTTTCAGTGTTTA | Primers used for the detection of RNAi interference efficiency of dsBSCL1-1 |
| qBSCL1-R1 | GAATGCTGGCACATCATT |
| qBSCL1-F2 | TGATGTGCCAGCATTCGC | Primers used for the detection of RNAi interference efficiency of dsBSCL1-2 |
| qBSCL1-R2 | ggTATCTAATCCTAGTTTAAACCCA |
| dsBSCL1-F1 | TAATACGACTCACTATAGGGGGAAGTTATTGGGGGTAACTTTAG | Primers used for dsRNA synthesis of dsBSCL1-1 |
| dsBSCL1-R1 | TAATACGACTCACTATAGGGCAAACAGGTTCCtctaaaaag |
| dsBSCL1-F2 | TAATACGACTCACTATAGGGaggggaaaggtttttaagcga | Primers used for dsRNA synthesis of dsBSCL1-2 |
| dsBSCL1-R2 | TAATACGACTCACTATAGGGTCAATTCTAATATATTCCACCCCca |
| *dsGFP-*F | TAATACGACTCACTATAGGGGCCACAAGTTCAGCGTGTCC | Primers used for dsRNA synthesis of dsGFP |
| *dsGFP-*R | TAATACGACTCACTATAGGGCTTCTCGTTGGGGTCTTTGCT |

**Legends for Supplementary data 1 to 6**

**Supplementary data 1: List of differentially expressed genes of BPH feeding on resistant rice RHT and susceptible rice TN1.**

**Supplementary data 2: Statistics of analyses of RNA-seq data retrieved from BPH-exposed (feeding sites) and non-exposed (control) rice sheaths. RNA-seq reads derived from 3 biological replicates per treatment were mapped to TN1 rice and BPH merged genome.**

**Supplementary data 3: Reads count of identified cross-kingdom RNAs in sample BPH-1-FS.**

**Supplementary data 4: List of differentially expressed genes in different rice lines with or without BPH feeding.**

Table 1. Differentially expressed gene sets in TN1 rice with and without BPH feeding.

Table 2. Differentially expressed gene sets in over-expression GFP TN1 rice with and without BPH feeding.

Table 3. Differentially expressed gene sets in over-expression *BSCL1_wt* TN1 rice with and without BPH feeding.

Table 4. Differentially expressed gene sets between TN1 and over-expression *BSCL1_wt* TN1 rice.

Table 5. Differentially expressed gene sets between TN1 and over-expression *BSCL1_wt* TN1 rice with BPH feeding.

Table 6. Differentially expressed gene sets between over-expression GFP and over-expression *BSCL1_wt* TN1 rice.

Table 7. Differentially expressed gene sets between over-expression GFP and over-expression *BSCL1_wt* TN1 rice with BPH feeding.

**Supplementary data 5: List of differentially expressed genes and their expression patterns in different clusters.**

**Supplementary data 6: List of potential *BSCL1*-interacting proteins in rice screened out vie yeast three-hybrid assays**

**SI References**

1. Zhang, J. et al. Combining next-generation sequencing and single-molecule sequencing to explore brown plant hopper responses to contrasting genotypes of japonica rice. *Bmc Genomics* **20**, 682 (2019).
2. Mathers, T. C. et al. Chromosome-scale genome assemblies of aphids reveal extensively rearranged autosomes and long-term conservation of the X chromosome. *Mol. Biol. Evol.* **38**, 856-875 (2021).
3. Mathers, T. C. et al. Hybridisation has shaped a recent radiation of grass-feeding aphids. *Bmc Biol.* **21**, 157 (2023).
4. Li, Y., Park, H., Smith, T. E. & Moran, N. A. Gene family evolution in the pea aphid based on chromosome-level genome assembly. *Mol. Biol. Evol.* **36**, 2143-2156 (2019).
5. Mathers, T. C. et al. Aphidinae comparative genomics resource (Version v2) [Data set]. Zenodo. (2022).
6. Chen, W. et al. Genome sequence of the corn leaf aphid (*Rhopalosiphum maidis* Fitch). *Gigascience* **8**, giz033 (2019).
7. Wenger, J. A. et al. Whole genome sequence of the soybean aphid, *Aphis glycines*. *Insect Biochem. Molec.* **123**, 102917 (2020).
8. Ma, W. et al. Chromosomal‐level genomes of three rice planthoppers provide new insights into sex chromosome evolution. *Mol*. *Ecol*. *Resour*. **21**, 226-237 (2021).
9. Mesquita, R. D. et al. Genome of *Rhodnius prolixus*, an insect vector of Chagas disease, reveals unique adaptations to hematophagy and parasite infection. *Proc. Natl. Acad. Sci. U.S.A.* **112**, 14936-14941 (2015).
10. Panfilio, K. A. et al. Molecular evolutionary trends and feeding ecology diversification in the Hemiptera, anchored by the milkweed bug genome. *Genome Biol.* **20**, 64 (2019).
11. Rotenberg, D. et al. Genome-enabled insights into the biology of thrips as crop pests. *Bmc Biol.* **18**, 142 (2020).
