# Supplementary material for: Insect-derived long non-coding RNAs function as epigenetic effectors to reprogram plant immunity
Source: Research Square preprint supplement (doi:10.21203/rs.3.rs-8297537/v1), 2025-12-12
Supplement: Supplementary file 5 [file cd3c412636e8861b7e09d0f1.xlsx]

## Sheet: Table 1
Table 1. Differentially expressed gene sets in TN1 rice with and without BPH feeding.
Id	TN1_1_FS	TN1_2_FS	TN1_3_FS	TN1_1_CK	TN1_2_CK	TN1_3_CK	TN1_FS	TN1_CK	FC	log2FoldChange	pvalue	padj	tagwise.dispersion	trended.dispersion	gene_type
OsTN.contig.g000166	0	0	6	40	9	38	2	28	11.805	3.561	0.000645075247135837	0.00728440402875916	0.5238	0.2797	up
OsTN.contig.g000167	17	14	4	77	120	255	12	125	10.154	3.344	1.30962821992824e-06	4.43662710223934e-05	0.2618	0.168	up
OsTN10g000029	480	603	671	192	271	300	631	219	0.346	-1.53	0.000411534486413208	0.00511871662953953	0.1268	0.169	down
OsTN10g000075	110	46	133	18	51	36	103	28	0.281	-1.831	0.00177289919128186	0.0160195454407816	0.2166	0.1222	down
OsTN10g000104	58	60	53	23	19	23	61	20	0.32	-1.645	0.00338423114163417	0.0263314668249535	0.1891	0.2024	down
OsTN10g000143	43	18	28	2	17	4	31	6	0.202	-2.307	0.000310742739210075	0.00409566269137853	0.2105	0.2078	down
OsTN10g000189	8	6	20	1	1	2	13	1	0.101	-3.301	0.0022546245525631	0.0192171143613198	0.5197	0.7299	down
OsTN10g000204	18	17	9	6	0	1	15	3	0.153	-2.71	0.00129754000435991	0.0125878000331476	0.307	0.2658	down
OsTN10g000214	8	16	2	11	60	86	9	41	4.438	2.15	0.00141944020228109	0.0135351026842513	0.2532	0.2077	up
OsTN10g000268	343	38	251	63	60	92	221	63	0.286	-1.807	0.00179058266691329	0.0161175240310824	0.2193	0.118	down
OsTN10g000341	115	202	246	30	57	24	205	32	0.156	-2.681	2.80112237135951e-09	2.08432989927793e-07	0.1182	0.1178	down
OsTN10g000381	0	0	0	0	166	1	0	41	327.196	8.354	0.000342261232154796	0.00443392422132361	1.8137	0.1868	up
OsTN10g000383	95	75	102	31	68	38	97	39	0.399	-1.324	0.000367545493527336	0.00468140377251304	0.0814	0.1381	down
OsTN10g000386	70	106	103	29	62	47	101	39	0.386	-1.373	0.000660607436498454	0.0073928769951571	0.0985	0.1384	down
OsTN10g000395	2	0	0	0	588	0	1	143	180.686	7.497	0.000941905602896049	0.00985932483742177	2.023	0.1596	up
OsTN10g000396	1	0	0	0	1202	10	0	295	636.581	9.314	9.52906998905625e-05	0.00159497227512167	1.9043	0.1881	up
OsTN10g000458	2	4	4	21	36	85	4	39	10.529	3.396	1.3313362442181e-06	4.50297411979798e-05	0.2153	0.2055	up
OsTN10g000468	201	218	29	10	49	37	155	25	0.165	-2.602	0.0030694806270559	0.0243617049618168	0.4825	0.1912	down
OsTN10g000470	83	40	19	3	13	2	49	5	0.104	-3.261	9.85226445042753e-06	0.000244656876112666	0.2782	0.2234	down
OsTN10g000483	1	1	5	28	16	17	3	19	7.209	2.85	0.00194295040584169	0.0171827144523289	0.3997	0.4466	up
OsTN10g000503	764	1595	3508	378	401	679	2171	420	0.194	-2.368	1.73896221013975e-05	0.000397822778753329	0.1971	0.1789	down
OsTN10g000510	64	1	0	0	0	0	21	0	0.006	-7.4	0.00154734630307023	0.0144685066354543	2.1476	1.0492	down
OsTN10g000513	55	81	46	25	14	29	65	21	0.316	-1.66	0.00311009488360208	0.0245920142418155	0.1904	0.1776	down
OsTN10g000518	25	19	14	61	87	144	20	82	4.009	2.003	3.36943305342189e-05	0.000685496836303739	0.1324	0.1973	up
OsTN10g000567	4	0	3	9	44	13	2	18	6.922	2.791	0.000872529688391422	0.00922419596296953	0.3113	0.2722	up
OsTN10g000587	36	28	57	92	285	392	44	206	4.722	2.239	4.00831558589603e-05	0.000784172957842224	0.1852	0.1303	up
OsTN10g000607	101	72	106	42	8	1	99	19	0.184	-2.441	0.000618522874284909	0.00706355120891764	0.3057	0.1773	down
OsTN10g000660	8	0	14	93	107	137	8	98	12.22	3.611	2.01431699377404e-07	8.85324078817905e-06	0.2465	0.2031	up
OsTN10g000665	1331	279	158	2	26	7	590	9	0.016	-6.004	7.73569479469924e-08	3.93407384918913e-06	0.5714	0.1155	down
OsTN10g000666	175	27	27	0	5	0	77	1	0.019	-5.719	3.407154273001e-07	1.38686220091233e-05	0.5279	0.2119	down
OsTN10g000686	0	0	0	1	6	23	0	8	63.6	5.991	0.000597741831076629	0.00688555731213583	0.8531	0.6689	up
OsTN10g000713	0	2	0	27	13	3	1	14	17.313	4.114	0.0049922392746588	0.0354081666547455	0.9733	0.5234	up
OsTN10g000737	55	366	463	51	127	107	328	79	0.239	-2.063	0.00586520524372717	0.0401107409234834	0.3685	0.1882	down
OsTN10g000765	25	43	8	56	164	250	27	126	4.685	2.228	0.000274553364357948	0.00372851395014388	0.2305	0.1241	up
OsTN10g000776	14	11	8	175	163	241	12	170	14.539	3.862	7.51822679675709e-07	2.703864737312e-05	0.3261	0.1751	up
OsTN10g000779	210	136	121	31	31	10	164	23	0.134	-2.898	3.34179100820688e-10	3.40718086110786e-08	0.1172	0.1251	down
OsTN10g000782	59	87	31	0	36	15	63	12	0.21	-2.255	0.00076415735361793	0.00835765085001312	0.2685	0.2035	down
OsTN10g000785	20	9	16	49	135	173	16	96	6.05	2.597	9.98773395916562e-06	0.000247730846867866	0.1964	0.171	up
OsTN10g000815	46	20	35	239	392	380	35	287	8.048	3.009	1.52443125577051e-12	2.58628909129002e-10	0.1018	0.1167	up
OsTN10g000824	51	88	1	0	0	0	49	0	0.003	-8.615	1.13511149186021e-06	3.89519569706788e-05	0.9034	0.3798	down
OsTN10g000827	0	0	7	9	52	35	3	25	9.504	3.249	4.63184978352349e-05	0.000880965366450069	0.2715	0.2677	up
OsTN10g000850	13	12	73	82	99	181	37	103	2.825	1.498	0.00614978030392146	0.0415609913656031	0.1901	0.1309	up
OsTN10g000866	44	28	19	8	22	1	32	9	0.28	-1.837	0.00462827857567075	0.0335332776748376	0.2341	0.204	down
OsTN10g000915	12	10	10	1	2	5	11	2	0.206	-2.28	0.00291820967652057	0.0233710243995361	0.2307	0.6525	down
OsTN10g000929	45	21	8	1	3	0	25	1	0.049	-4.337	0.000207806521053019	0.00297968417307057	0.6186	0.221	down
OsTN10g000938	95	93	75	192	438	387	93	281	3.02	1.594	2.60569199628905e-05	0.000550270834532668	0.0926	0.118	up
OsTN10g000945	36	20	37	51	106	131	33	79	2.408	1.268	0.00231240629445225	0.0195938512453669	0.102	0.14	up
OsTN10g000953	0	0	0	8	14	4	0	8	61.406	5.94	8.61860802919441e-05	0.0014751801491132	0.4603	0.6899	up
OsTN10g000967	103	75	55	175	236	258	81	192	2.354	1.235	0.000555574639299408	0.00650583731398263	0.0817	0.1186	up
OsTN10g000973	161	34	14	15	27	12	69	16	0.224	-2.157	0.0025248126627408	0.0208991811626636	0.3122	0.2046	down
OsTN10g000975	17	33	22	67	99	117	26	80	3.107	1.636	0.000128414656078365	0.00204763821308379	0.1033	0.186	up
OsTN10g000978	18	9	6	6	153	71	11	58	5.034	2.332	0.00323366396291397	0.0253423176871828	0.3752	0.1447	up
OsTN10g001006	86	78	147	268	345	405	112	293	2.611	1.385	0.00238759734518366	0.0200609258713589	0.1389	0.1151	up
OsTN10g001061	26	10	2	39	79	161	13	76	5.81	2.539	2.9621184554495e-05	0.000614053236409751	0.2078	0.1813	up
OsTN10g001089	52	32	19	14	11	22	36	14	0.384	-1.381	0.00594576293756126	0.0405049131438682	0.1347	0.2044	down
OsTN10g001109	176	196	189	69	85	138	200	83	0.416	-1.267	0.000412410879954514	0.00512360722389887	0.0827	0.1156	down
OsTN10g001129	0	0	1	1043	1	2	0	415	844.535	9.722	6.48683373686701e-06	0.000170255300814033	1.4746	0.1553	up
OsTN10g001139	30	8	23	78	115	201	21	110	5.122	2.357	0.000106422854335698	0.00174413405865313	0.2213	0.1661	up
OsTN10g001148	76	47	86	225	423	376	74	288	3.866	1.951	1.45345338363566e-08	8.98640988535321e-07	0.0727	0.1219	up
OsTN10g001149	19	10	6	15	54	61	12	35	2.855	1.513	0.00640397018226867	0.0428825373082954	0.1678	0.2135	up
OsTN10g001150	93	81	69	183	389	442	86	280	3.258	1.704	2.27691812752918e-05	0.000498313753668849	0.104	0.1154	up
OsTN10g001184	0	0	0	0	27	0	0	7	54.253	5.762	0.00751082550689136	0.0482815368363756	1.8346	0.3158	up
OsTN10g001214	157	25	25	1	13	4	69	4	0.07	-3.842	0.000378652010930299	0.00479493555538924	0.6323	0.2029	down
OsTN10g001215	44	46	37	329	232	261	45	254	5.593	2.484	8.09344764624412e-10	6.94889652768822e-08	0.0959	0.1163	up
OsTN10g001228	59	45	53	17	29	31	56	22	0.392	-1.351	0.00249604492097709	0.0207014566441773	0.113	0.1977	down
OsTN10g001235	7	3	0	38	231	139	3	107	30.039	4.909	5.74322864895504e-09	3.96731758822116e-07	0.3162	0.1794	up
OsTN10g001257	72	70	69	721	626	923	75	674	8.953	3.162	3.10834735213172e-14	7.24381563699532e-12	0.1011	0.1433	up
OsTN10g001298	102	106	66	184	346	333	97	242	2.501	1.322	6.94839576266825e-05	0.0012341258705101	0.0705	0.1183	up
OsTN10g001315	107	42	39	8	25	14	65	13	0.202	-2.309	5.05639450070574e-05	0.000949787052050192	0.1836	0.2024	down
OsTN10g001329	187	97	60	23	64	38	118	34	0.292	-1.776	0.000354787395470169	0.00454928400569656	0.1545	0.1653	down
OsTN10g001330	412	266	158	82	132	63	290	81	0.278	-1.848	1.86128953831956e-05	0.000421263257621589	0.12	0.1169	down
OsTN10g001337	298	191	131	68	140	50	216	74	0.342	-1.547	0.00357591817894772	0.0275161454357563	0.187	0.1203	down
OsTN10g001340	202	186	216	4	13	25	215	11	0.054	-4.211	4.21485628503808e-20	3.31053545321491e-17	0.0992	0.1156	down
OsTN10g001347	31	24	57	6	4	4	41	4	0.107	-3.231	4.04593401786687e-05	0.000789347955077302	0.3104	0.2142	down
OsTN10g001356	44	55	145	341	633	838	90	503	5.609	2.488	3.82981026511602e-06	0.000108291715056421	0.1824	0.1251	up
OsTN10g001411	48	91	44	12	30	15	66	16	0.245	-2.028	0.000733559561780461	0.00808420744438018	0.2144	0.1892	down
OsTN10g001414	155	106	140	75	66	20	142	51	0.354	-1.499	0.000934209326003785	0.00979810938504564	0.1301	0.1238	down
OsTN10g001429	10	3	7	45	37	26	7	34	4.663	2.221	0.00196074438130139	0.0172958158336086	0.2774	0.2207	up
OsTN10g001444	585	619	834	205	238	243	733	201	0.274	-1.867	0.000137566881322895	0.00214987535166886	0.1595	0.1825	down
OsTN10g001445	138	75	66	60	24	28	97	37	0.372	-1.428	0.00395403910117719	0.0297141414665715	0.1538	0.132	down
OsTN10g001449	0	0	0	0	29	1	0	7	60.382	5.916	0.00292363331878183	0.02340562166531	1.3754	0.1903	up
OsTN10g001467	4	5	29	2	3	0	14	1	0.112	-3.162	0.00389949776567135	0.0293562829664864	0.5734	0.4851	down
OsTN10g001485	23	40	14	123	88	119	27	100	3.653	1.869	0.000923973042062373	0.00970514923378739	0.1961	0.1985	up
OsTN10g001521	12	28	18	66	74	221	21	101	4.788	2.259	0.00071772538564221	0.00794405128043546	0.2719	0.1201	up
OsTN10g001522	5	4	7	18	30	64	6	31	5.31	2.409	0.0004711644335146	0.0057031872954019	0.2379	0.202	up
OsTN10g001523	23	31	19	150	116	304	26	165	6.332	2.663	5.95276136488646e-05	0.00108827767469954	0.265	0.1168	up
OsTN10g001524	4	9	1	20	25	62	5	30	5.902	2.561	0.00116105945904386	0.0115382324029724	0.3239	0.2032	up
OsTN10g001525	71	47	24	97	169	203	49	131	2.659	1.411	0.00055420088512092	0.00649333600594439	0.1038	0.1446	up
OsTN10g001527	7	30	15	7	2	3	19	4	0.204	-2.296	0.0037567733356295	0.0286067835291543	0.3082	0.2733	down
OsTN10g001533	32	33	19	87	154	109	30	100	3.358	1.748	0.00724850867591206	0.0471615044801196	0.2707	0.1361	up
OsTN10g001537	100	34	87	21	39	36	78	27	0.348	-1.521	0.000592032492682061	0.00684208886774304	0.1158	0.173	down
OsTN10g001547	24	40	8	15	253	131	25	101	3.976	1.991	0.00339788335938846	0.0264048781247897	0.2913	0.1786	up
OsTN10g001565	71	34	43	142	165	205	51	149	2.859	1.516	3.5602591973773e-05	0.000710276733760869	0.0814	0.1357	up
OsTN10g001639	99	68	70	35	62	41	83	39	0.472	-1.083	0.00225076152425071	0.0192095787646002	0.0724	0.16	down
OsTN10g001654	60	59	43	3	18	3	57	6	0.115	-3.125	0.000457741658405386	0.00557251857049542	0.4477	0.2072	down
OsTN10g001655	65	58	149	16	20	6	99	13	0.127	-2.973	4.97472480036553e-07	1.8906628824615e-05	0.1913	0.155	down
OsTN10g001656	54	17	84	21	8	0	56	10	0.179	-2.48	0.00365497119710674	0.0280227672368195	0.4301	0.2019	down
OsTN10g001663	127	211	120	1004	775	1405	164	945	5.767	2.528	2.15752006765157e-07	9.43392331436842e-06	0.1504	0.1726	up
OsTN10g001670	1502	3840	4420	429	504	898	3577	522	0.146	-2.777	0.000103731722329591	0.00170794925112083	0.3223	0.1529	down
OsTN10g001676	91	153	107	22	13	68	126	29	0.233	-2.103	7.7143618600043e-05	0.00134759861585759	0.1735	0.1801	down
OsTN10g001702	7	0	1	9	26	33	3	18	6.467	2.693	0.000317044786504019	0.00416062424962298	0.2334	0.2086	up
OsTN10g001704	141	86	128	53	25	10	126	30	0.232	-2.105	0.0014986267700553	0.0141187818358786	0.276	0.1205	down
OsTN10g001709	21	23	31	2	5	3	27	3	0.108	-3.207	0.000129426138113716	0.00205906985069586	0.3378	0.2057	down
OsTN10g001721	8	6	12	0	3	0	10	1	0.101	-3.304	0.00018633813806618	0.00273283049375482	0.2265	0.4014	down
OsTN10g001723	67	50	63	26	21	30	64	23	0.356	-1.49	0.00017610608384101	0.00261715607569467	0.0847	0.1682	down
OsTN10g001727	112	61	96	35	19	11	95	21	0.22	-2.186	0.000317569436568309	0.00416493199833279	0.222	0.1533	down
OsTN10g001734	45	111	33	1	2	3	67	1	0.027	-5.23	1.54655029574113e-06	5.09280933568045e-05	0.5213	0.1695	down
OsTN10g001738	806	835	905	272	468	538	910	359	0.394	-1.342	0.000196653489260626	0.00285841709852645	0.0888	0.1882	down
OsTN10g001744	0	0	0	4	9	3	0	5	37.335	5.222	0.00172893699781243	0.015702598249511	0.6687	0.7854	up
OsTN10g001752	1736	454	112	34	326	185	767	140	0.183	-2.45	0.00308841974833999	0.0244662374310968	0.442	0.133	down
OsTN10g001754	114	4	0	0	2	0	38	0	0.017	-5.88	0.00239425378545891	0.0200954607049307	1.6758	0.5146	down
OsTN10g001781	31	37	33	9	23	21	36	15	0.411	-1.284	0.00568863857113894	0.0392449441047962	0.1121	0.2052	down
OsTN10g001789	0	1	1	8	26	9	1	12	14.186	3.826	0.000703636590107512	0.00781666902378733	0.4683	0.4249	up
OsTN10g001798	152	168	139	61	107	96	164	75	0.458	-1.127	0.0029316176509567	0.0234602147811948	0.0925	0.115	down
OsTN10g001807	8	15	8	19	80	79	11	47	4.242	2.085	0.00202382438145678	0.0176986571783727	0.2626	0.1931	up
OsTN10g001808	26	12	35	239	263	356	26	250	9.514	3.25	7.01799438226519e-07	2.55722692207385e-05	0.2472	0.1372	up
OsTN10g001809	56	50	50	93	157	211	55	129	2.326	1.218	0.0053815442311356	0.0375786659564348	0.1226	0.136	up
OsTN10g001815	114	123	92	356	220	333	117	280	2.389	1.257	0.00778970771302269	0.0496532405981581	0.1503	0.1217	up
OsTN10g001824	0	0	0	5	8	2	0	5	36.072	5.173	0.00115306969029255	0.0114911414107303	0.5171	0.9641	up
OsTN10g001830	64	158	80	290	365	550	109	344	3.16	1.66	0.00249213275632031	0.0206876744217639	0.201	0.137	up
OsTN10g001850	2	0	0	19	6	8	1	11	13.552	3.76	0.00420927111481315	0.0311526587208313	0.7326	1.1628	up
OsTN10g001860	75	50	60	79	234	300	65	165	2.527	1.337	0.000314855188546699	0.00413957469529439	0.0866	0.1176	up
OsTN10g001862	194	199	214	28	65	26	217	33	0.156	-2.685	3.11933599794883e-12	5.04975255790083e-10	0.0838	0.1184	down
OsTN10g001867	26	35	32	4	4	11	33	5	0.165	-2.602	8.8479328185473e-05	0.00150471620916546	0.2202	0.2112	down
OsTN10g001884	224	198	191	30	153	96	218	74	0.341	-1.552	0.00126577051243518	0.0123190432570963	0.1528	0.1157	down
OsTN10g001885	47	52	45	8	32	13	51	14	0.284	-1.817	0.00218742894638663	0.0187505277550611	0.2074	0.2001	down
OsTN10g001888	163	109	158	18	26	12	153	16	0.108	-3.21	3.46999977265413e-07	1.40973726395931e-05	0.2232	0.1322	down
OsTN10g001891	29	21	22	0	0	0	25	0	0.005	-7.675	5.49314637230839e-10	5.17747356077974e-08	0.3028	0.3588	down
OsTN10g001896	24	27	25	0	0	0	27	0	0.005	-7.769	3.30123494750824e-06	9.52507340568806e-05	0.7997	0.2053	down
OsTN10g001898	8	7	1	90	405	181	6	180	31.81	4.991	3.6227259802436e-07	1.46337428310526e-05	0.4622	0.1464	up
OsTN10g001903	338	163	324	22	75	36	292	36	0.125	-3.002	7.81552473249699e-08	3.96516346894889e-06	0.1851	0.1159	down
OsTN10g001904	391	293	268	59	97	79	335	67	0.2	-2.319	5.09056842651155e-09	3.56289388188219e-07	0.097	0.1169	down
OsTN10g001914	282	239	153	944	715	940	236	788	3.329	1.735	7.30342211420025e-05	0.00128427589366372	0.128	0.1812	up
OsTN10g001916	596	832	988	37	20	19	874	25	0.028	-5.182	1.59318595970137e-14	3.92868542411477e-12	0.2222	0.188	down
OsTN10g001917	71	150	156	16	11	7	137	11	0.076	-3.714	2.9069725445002e-12	4.74216667317043e-10	0.1394	0.1264	down
OsTN10g001918	0	0	0	0	8	34	0	11	87.191	6.446	8.1637173788448e-05	0.00141328942410744	0.6744	0.3985	up
OsTN10g001935	19	10	9	0	2	0	13	0	0.05	-4.325	0.000951987209249578	0.00995011963851937	0.7243	0.4765	down
OsTN10g001939	160	220	119	65	123	119	177	86	0.487	-1.038	0.0016330921082598	0.0150382042292078	0.0692	0.1167	down
OsTN10g001941	568	417	536	181	82	66	540	109	0.2	-2.324	5.18004576541249e-06	0.00014138124909537	0.1658	0.1383	down
OsTN10g001943	0	0	1	12	7	11	0	9	19.082	4.254	0.00038762896768474	0.00486993336356059	0.4157	0.5749	up
OsTN10g001948	39	11	27	1	0	1	27	1	0.026	-5.267	4.18704349125326e-10	4.11086256106518e-08	0.1903	0.2037	down
OsTN10g001949	22	12	22	0	0	0	20	0	0.006	-7.322	5.25290892397342e-10	5.01794772750921e-08	0.2411	0.2053	down
OsTN10g001951	23	29	20	134	66	140	26	105	4.07	2.025	0.00585338138700742	0.0400427932497633	0.3422	0.1447	up
OsTN10g001957	135	75	174	455	1168	534	137	601	4.372	2.128	0.00119980491280172	0.0118455599561388	0.2831	0.1726	up
OsTN10g001958	5	1	0	23	81	43	2	40	18.349	4.198	6.94777011001098e-06	0.000180786945672396	0.3855	0.2127	up
OsTN10g001973	564	295	661	16	65	8	542	24	0.045	-4.471	2.31193389950578e-08	1.35136543128072e-06	0.3386	0.1286	down
OsTN10g001975	90	43	81	0	2	2	76	1	0.016	-5.93	2.97225486405874e-19	1.96976902819043e-16	0.1263	0.2043	down
OsTN10g001980	3	1	6	18	25	28	4	20	5.51	2.462	0.00275522646287534	0.0223015601519838	0.331	0.4	up
OsTN10g001984	43	27	19	57	173	128	31	97	3.135	1.648	0.00131303356799828	0.0127010885789077	0.1628	0.169	up
OsTN10g002020	1	2	0	4	10	20	1	9	7.9	2.982	0.00386304078143837	0.0291792587663329	0.4082	0.5279	up
OsTN10g002030	0	0	0	0	51	0	0	12	101.46	6.665	0.000413161794125197	0.00512993101171724	1.1059	0.2337	up
OsTN10g002035	45	36	11	7	12	10	32	8	0.261	-1.936	0.00383865803507102	0.0290426046913133	0.2498	0.2559	down
OsTN10g002048	212	377	238	124	86	131	297	104	0.348	-1.522	0.00667307438897284	0.0441409508942442	0.2118	0.1331	down
OsTN10g002050	2	7	5	51	108	171	5	90	17.438	4.124	3.39083236695945e-07	1.38287273088671e-05	0.318	0.1991	up
OsTN10g002052	14	18	3	202	220	622	12	292	23.624	4.562	2.25972918929164e-06	7.03701570004521e-05	0.4815	0.1152	up
OsTN10g002058	0	0	0	0	8	5	0	3	27.771	4.796	0.00592471867210585	0.0404004851702086	0.8224	0.2787	up
OsTN10g002065	1299	884	974	145	297	244	1113	192	0.173	-2.534	4.52657653069957e-07	1.74536560884629e-05	0.1604	0.186	down
OsTN10g002068	36	20	46	16	8	13	37	12	0.309	-1.696	0.000793118307226088	0.00859102232626052	0.1288	0.2031	down
OsTN10g002075	4923	4445	4381	1438	1830	2579	4882	1673	0.343	-1.545	0.000216471846360388	0.00307688903871632	0.1199	0.1517	down
OsTN10g002079	6	9	10	118	153	176	9	129	14.186	3.826	3.79598668656758e-12	6.00757385537602e-10	0.1442	0.1513	up
OsTN10g002092	135	151	188	476	812	956	170	630	3.696	1.886	3.5539928454806e-05	0.000710159369356414	0.1373	0.1596	up
OsTN10g002096	2	0	7	6	35	18	3	16	4.688	2.229	0.00507554998212587	0.0358910264991475	0.2918	0.2053	up
OsTN10g002111	6	22	12	0	2	3	15	1	0.102	-3.293	0.000296689190278328	0.00395716204920283	0.3406	0.2788	down
OsTN10g002115	211	225	236	71	150	95	240	89	0.371	-1.431	0.000145282894998611	0.00224891558703324	0.0921	0.1305	down
OsTN10g002123	13	27	8	4	2	7	17	4	0.227	-2.139	0.00460539651318964	0.0334187892265759	0.2753	0.3438	down
OsTN10g002136	478	489	233	651	1209	1616	421	964	2.288	1.194	0.00635797723655354	0.0426553695841793	0.1328	0.1836	up
OsTN10g002152	302	191	429	15	52	35	331	28	0.084	-3.579	0.00196363566859922	0.0173079059118801	0.7785	0.1323	down
OsTN10g002164	9	7	2	18	36	27	6	23	3.581	1.84	0.00614635070714355	0.0415609913656031	0.2287	0.2359	up
OsTN10g002176	49	36	24	390	427	756	38	451	11.784	3.559	1.35199830047775e-12	2.31224419017996e-10	0.1404	0.1238	up
OsTN10g002200	4	2	2	9	24	26	3	16	5.554	2.474	0.000656631741445024	0.00736392878943661	0.2098	0.4118	up
OsTN10g002206	71	50	20	1	10	2	49	3	0.075	-3.746	4.13149969800075e-07	1.6285634590242e-05	0.2578	0.2193	down
OsTN11g000012	0	1	0	9	15	45	0	19	39.355	5.298	2.55430571802278e-06	7.79412393699411e-05	0.3624	0.533	up
OsTN11g000027	19	14	2	2	0	2	12	1	0.109	-3.198	0.00234602621362499	0.0198373915120993	0.4817	0.5781	down
OsTN11g000028	22	18	7	2	4	7	16	3	0.227	-2.14	0.007142011880568	0.0466463338316001	0.3178	0.5315	down
OsTN11g000034	64	46	41	6	34	39	53	21	0.4	-1.321	0.00200425176456717	0.017570966172458	0.1016	0.2012	down
OsTN11g000054	85	38	30	3	23	15	53	11	0.209	-2.258	0.000146729018780904	0.00226633816554015	0.1991	0.2025	down
OsTN11g000060	436	389	372	87	243	354	425	184	0.434	-1.203	0.0044222242949606	0.0323386588355963	0.1221	0.172	down
OsTN11g000062	8	4	0	47	142	281	4	125	29.318	4.874	2.4553332615375e-11	3.4256745050938e-09	0.2327	0.1556	up
OsTN11g000063	23	9	13	118	207	323	16	180	11.349	3.504	3.46588533768425e-06	9.93257166976621e-05	0.3189	0.1154	up
OsTN11g000071	159	285	0	0	0	0	155	0	0.001	-10.278	2.16968922899708e-08	1.27812776331503e-06	0.8993	0.2044	down
OsTN11g000072	26	27	0	0	0	1	18	0	0.022	-5.524	0.00328961508307591	0.0257048146893113	1.5475	1.1867	down
OsTN11g000075	12	1	7	19	52	120	7	51	7.207	2.849	7.14067714177255e-06	0.000184841608232901	0.2028	0.1979	up
OsTN11g000095	2	12	7	6	191	80	8	69	8.948	3.162	0.00195202603031094	0.0172342281535404	0.5962	0.1423	up
OsTN11g000132	20	31	18	61	97	78	25	68	2.741	1.455	0.0031694798666319	0.0249777627393767	0.1442	0.1894	up
OsTN11g000137	1692	1146	1051	2690	3984	4627	1364	3216	2.356	1.236	0.00291776224656961	0.0233710243995361	0.1203	0.1778	up
OsTN11g000188	66	21	48	83	191	371	47	174	3.673	1.877	0.00150769060887591	0.0141726927049785	0.2256	0.1629	up
OsTN11g000194	143	144	73	250	363	416	126	294	2.318	1.213	0.00164510205704905	0.0151290890389589	0.0989	0.1171	up
OsTN11g000198	0	0	0	2	19	1	0	6	47.78	5.578	0.000158019014110682	0.00240222884031916	0.3818	0.1807	up
OsTN11g000203	25	17	5	124	121	167	16	121	7.394	2.886	5.27380355124778e-06	0.000143755208112226	0.2292	0.1779	up
OsTN11g000206	23	36	17	95	80	59	27	72	2.648	1.405	0.00686923928676384	0.0452291604488422	0.1649	0.1951	up
OsTN11g000212	53	27	32	0	2	5	39	2	0.052	-4.254	1.1793221112943e-10	1.37416945133068e-08	0.1544	0.2099	down
OsTN11g000238	8	68	45	5	9	14	45	8	0.178	-2.491	0.000586619188203547	0.00679353843938162	0.295	0.2068	down
OsTN11g000245	73	48	34	9	25	20	54	15	0.278	-1.847	0.000137267633206123	0.00214836509033376	0.1284	0.2011	down
OsTN11g000247	75	86	36	16	40	22	69	22	0.316	-1.663	0.00111171099910413	0.0112053494096965	0.1556	0.2015	down
OsTN11g000254	25	36	24	105	182	105	30	113	3.704	1.889	0.000923319386772218	0.00970308931381487	0.2025	0.1539	up
OsTN11g000291	106	60	95	38	77	36	92	43	0.466	-1.102	0.00560378461956673	0.0387604241445374	0.0968	0.1577	down
OsTN11g000294	35	32	19	87	76	162	30	95	3.099	1.632	6.27281935807992e-05	0.00113698871903249	0.0955	0.1656	up
OsTN11g000298	0	2	0	9	7	18	1	10	11.852	3.567	0.000672709809511917	0.00750095042791278	0.3567	0.8307	up
OsTN11g000301	0	0	0	1	8	5	0	4	30.605	4.936	0.00541830931721939	0.0377980545033788	0.9004	0.892	up
OsTN11g000303	30	38	33	3	6	10	36	5	0.15	-2.738	8.59603834506957e-06	0.000217797114915042	0.1803	0.2198	down
OsTN11g000307	8	2	3	26	23	36	4	25	5.373	2.426	0.000171655870299409	0.00256359580383067	0.1836	0.2427	up
OsTN11g000311	4	2	1	6	24	31	2	16	6.401	2.678	0.00121995134914087	0.0119942087441958	0.2997	0.3242	up
OsTN11g000325	7	8	8	0	0	1	8	0	0.049	-4.357	4.29940027692359e-05	0.000828885287933805	0.262	0.5575	down
OsTN11g000343	333	255	96	49	134	162	237	93	0.396	-1.337	0.000719376895141086	0.00795817726408816	0.1029	0.1152	down
OsTN11g000347	24	5	9	30	157	229	13	109	8.237	3.042	1.14465024041996e-05	0.000277423973126698	0.2713	0.1485	up
OsTN11g000370	12	31	17	3	0	3	22	2	0.089	-3.497	6.77464594682467e-05	0.0012073102234816	0.3294	0.2319	down
OsTN11g000371	84	93	78	31	36	83	91	42	0.467	-1.099	0.00513333442850941	0.0362271624710147	0.0938	0.1487	down
OsTN11g000373	15	2	16	18	41	100	11	42	3.638	1.863	0.00347456823382587	0.0268414820328541	0.2328	0.204	up
OsTN11g000376	2	2	7	61	35	60	4	48	11.634	3.54	0.000176498463987615	0.00261931625317379	0.4565	0.2107	up
OsTN11g000383	33	31	21	163	130	159	30	137	4.524	2.178	7.65179446449333e-08	3.90075974058919e-06	0.0927	0.1414	up
OsTN11g000398	2	7	26	0	1	1	13	1	0.051	-4.294	0.000651533305200063	0.00733774161066223	0.6498	0.4825	down
OsTN11g000415	55	29	41	122	139	98	44	107	2.423	1.277	0.00481821604899317	0.0345319052892863	0.1289	0.1614	up
OsTN11g000418	2	0	1	10	10	21	1	12	10.093	3.335	0.00181475599550529	0.0163017186335403	0.4608	0.7351	up
OsTN11g000424	41	15	24	0	2	0	28	0	0.024	-5.363	3.94435141966609e-09	2.81816587484641e-07	0.2476	0.2143	down
OsTN11g000425	12	16	11	0	1	0	14	0	0.029	-5.12	1.44520096086053e-05	0.000340159564672245	0.4302	0.5571	down
OsTN11g000434	255	282	246	50	198	180	279	114	0.41	-1.286	0.00363667212100685	0.027922847816869	0.1316	0.1271	down
OsTN11g000439	313	232	114	480	904	893	229	638	2.785	1.477	0.00107779929777367	0.0109633084450365	0.1386	0.161	up
OsTN11g000444	418	349	457	122	244	297	437	183	0.421	-1.249	0.00161969179298816	0.0149667990648801	0.1065	0.1709	down
OsTN11g000445	1096	877	1288	388	423	562	1165	400	0.343	-1.543	0.00109892998018902	0.0111134993275482	0.1526	0.1868	down
OsTN11g000484	0	3825	0	1	0	0	1395	0	0	-11.547	3.53222464945766e-05	0.000707345497082612	2.2674	0.1316	down
OsTN11g000496	4866	9184	11520	1604	2842	4331	9327	2431	0.261	-1.94	0.000158550532608109	0.00240858248210613	0.177	0.1347	down
OsTN11g000518	3129	4438	3340	7175	9896	12117	3904	8342	2.137	1.095	0.00406633843912389	0.0303536921078847	0.1022	0.1384	up
OsTN11g000543	333	211	290	26	52	50	295	36	0.122	-3.035	1.00310807705933e-15	3.24101621658828e-13	0.0796	0.115	down
OsTN11g000546	11	6	2	0	1	0	7	0	0.06	-4.05	0.000411174602174198	0.00511724165980529	0.3451	0.4101	down
OsTN11g000566	5	2	0	12	13	23	2	14	5.455	2.448	0.00337467083032378	0.0262919339818796	0.3023	0.4941	up
OsTN11g000567	8	0	4	32	16	61	4	32	7.521	2.911	0.00197463955547075	0.0173942271240978	0.4755	0.2209	up
OsTN11g000569	97	0	0	0	0	0	31	0	0.004	-7.971	0.00110955980861685	0.0111889847177069	2.2745	0.6972	down
OsTN11g000574	8	9	26	44	69	83	16	55	3.519	1.815	0.00139417585008492	0.0133405185856479	0.1852	0.2028	up
OsTN11g000600	168	169	112	12	58	31	159	27	0.172	-2.537	2.96806069892881e-08	1.69203395812321e-06	0.1219	0.1452	down
OsTN11g000620	1031	953	580	111	401	277	901	212	0.236	-2.083	1.11187751790416e-06	3.82165097604434e-05	0.1197	0.1821	down
OsTN11g000623	28	27	10	4	5	2	23	4	0.146	-2.778	0.00015521241601098	0.0023646477775466	0.2448	0.3669	down
OsTN11g000644	56	24	15	7	15	10	32	9	0.279	-1.843	0.000672740496717598	0.00750095042791278	0.149	0.205	down
OsTN11g000645	38	16	26	7	1	4	28	4	0.134	-2.895	1.06128692963099e-05	0.000260193201348953	0.1851	0.2208	down
OsTN11g000660	1	0	14	42	25	32	6	31	5.427	2.44	0.00107890907364508	0.0109633084450365	0.2863	0.2081	up
OsTN11g000662	189	139	198	33	106	50	187	51	0.278	-1.847	4.38666170117108e-06	0.000122380425685416	0.1005	0.1171	down
OsTN11g000665	4	51	5	0	0	0	22	0	0.006	-7.453	4.18335454794178e-05	0.000810195432860287	1.0474	0.6487	down
OsTN11g000671	80	33	20	8	25	8	45	11	0.252	-1.989	0.00265839338208931	0.0217334419637502	0.2572	0.2095	down
OsTN11g000679	20	57	6	1	15	4	29	5	0.182	-2.462	0.00457761177836166	0.0332798810365841	0.4291	0.302	down
OsTN11g000684	511	312	341	88	168	86	409	98	0.239	-2.063	0.00110589332531458	0.0111728664404994	0.2623	0.161	down
OsTN11g000709	63	34	30	100	116	156	44	108	2.421	1.276	0.00111635398070488	0.0112468023129731	0.0928	0.1452	up
OsTN11g000712	9	0	14	31	42	36	8	32	3.803	1.927	0.00476289569247275	0.0342047846089636	0.2548	0.2132	up
OsTN11g000722	0	0	0	1	17	3	0	5	45.658	5.513	6.10254610372024e-05	0.00111278327791569	0.238	0.1579	up
OsTN11g000736	125	50	73	31	12	24	87	21	0.242	-2.045	0.000248074333849122	0.0034273044937709	0.1858	0.1716	down
OsTN11g000752	0	2	0	0	89	15	1	25	30.533	4.932	0.00123843799392925	0.0121253714391771	1.0294	0.1851	up
OsTN11g000753	175	285	194	49	14	20	235	28	0.117	-3.098	1.65099069301854e-07	7.49733610853194e-06	0.2025	0.13	down
OsTN11g000755	106	412	474	36	96	141	366	74	0.202	-2.307	0.000138840907028093	0.00216742498326272	0.2351	0.1167	down
OsTN11g000758	0	0	0	0	38	2	0	10	79.681	6.316	0.00623313067126139	0.0419638102049017	2.1495	0.2364	up
OsTN11g000764	0	0	0	1	36	1	0	9	77.93	6.284	8.1255487677873e-05	0.00140898211544125	0.6066	0.221	up
OsTN11g000793	4	1	3	23	11	44	3	23	7.843	2.971	0.00170794660956081	0.0155586012667337	0.4471	0.419	up
OsTN11g000803	519	1213	816	3690	2292	4040	922	3051	3.31	1.727	0.00157946096448571	0.0147104210249664	0.2029	0.17	up
OsTN11g000804	105	209	114	542	568	907	154	584	3.802	1.927	0.000114960318698138	0.00186674079527673	0.1645	0.1609	up
OsTN11g000805	95	117	58	257	416	526	96	337	3.53	1.82	5.57472844792395e-05	0.00102932328091368	0.1326	0.1174	up
OsTN11g000857	0	0	51	0	0	0	20	0	0.006	-7.295	0.0011928688228646	0.0117825659648298	1.9555	0.2549	down
OsTN11g000877	142	4	0	0	2	1	47	1	0.019	-5.689	0.000872527109217539	0.00922419596296953	1.3167	0.4128	down
OsTN11g000887	287	101	56	16	71	45	150	35	0.235	-2.087	0.000166799596297303	0.00250518345515361	0.1932	0.1652	down
OsTN11g000888	288	122	241	55	93	61	229	60	0.262	-1.934	0.000162639365390921	0.00245661896142826	0.1693	0.1162	down
OsTN11g000898	91	47	52	206	317	315	66	239	3.596	1.846	0.000266658573327751	0.00364370384314537	0.1657	0.1225	up
OsTN11g000899	4	2	1	27	10	11	2	16	6.155	2.622	0.00599643531011279	0.0407062751669532	0.4403	0.5706	up
OsTN11g000926	178	203	211	60	98	81	212	68	0.322	-1.633	0.000188043435935587	0.00275213053546307	0.1235	0.1243	down
OsTN11g000939	92	67	79	258	189	312	84	228	2.696	1.431	0.00076644331352225	0.00837833162364245	0.118	0.1186	up
OsTN11g000941	4	0	0	52	32	134	1	62	42.036	5.394	3.59777570350892e-07	1.45606926229606e-05	0.4555	0.1972	up
OsTN11g000958	321	155	122	53	47	25	207	39	0.186	-2.424	7.8388908567701e-06	0.000201342955543064	0.1803	0.1357	down
OsTN11g000971	133	111	113	182	437	453	126	294	2.325	1.217	0.00178882941274608	0.0161137575571987	0.1013	0.1278	up
OsTN11g000984	0	0	0	0	24	22	0	12	94.011	6.555	7.38694011970265e-05	0.00129681158210707	0.7036	0.2857	up
OsTN11g000992	17	2	1	40	54	98	6	54	7.856	2.974	2.14717159775832e-05	0.000473830052795636	0.2558	0.2063	up
OsTN11g001006	0	0	0	0	36	0	0	9	72.305	6.176	0.000675953738577127	0.00752886078466657	0.9896	0.2094	up
OsTN11g001016	793	685	580	263	384	452	727	313	0.431	-1.216	0.00516621272481659	0.0364107255750034	0.1304	0.178	down
OsTN11g001038	10	46	57	0	6	5	42	3	0.073	-3.78	1.49430447645567e-05	0.000350549945046408	0.3727	0.1966	down
OsTN11g001039	10	19	37	5	2	1	25	3	0.107	-3.22	0.000236427174848613	0.00328565602687715	0.3579	0.2211	down
OsTN11g001064	59	66	82	40	36	25	74	31	0.41	-1.285	0.00193959885435187	0.017160230665098	0.1	0.1652	down
OsTN11g001066	48	36	56	18	35	14	50	19	0.385	-1.377	0.0023491584049013	0.0198559594630299	0.113	0.1803	down
OsTN11g001088	5	33	0	0	0	0	14	0	0.009	-6.782	0.00253935406687591	0.0210031519876121	2.0605	1.5155	down
OsTN11g001112	48	55	49	2	6	4	54	3	0.064	-3.963	2.77604054369919e-10	2.9289299408074e-08	0.164	0.2035	down
OsTN11g001140	13	4	7	29	36	35	8	29	3.403	1.767	0.000193679984854906	0.00282099686732004	0.0919	0.206	up
OsTN11g001150	16	80	7	4	5	0	37	3	0.077	-3.705	0.00157698464023187	0.0146938107492958	0.7219	0.3692	down
OsTN11g001165	62	45	26	12	5	9	46	8	0.173	-2.533	2.60105767955848e-05	0.000550270834532668	0.1867	0.1981	down
OsTN11g001201	383	315	419	119	176	228	399	148	0.372	-1.426	0.000206129750595183	0.00295964361602711	0.0986	0.1395	down
OsTN11g001206	238	133	139	47	116	161	178	88	0.496	-1.012	0.0060315221565108	0.0409051776057322	0.0889	0.1156	down
OsTN11g001262	0	0	0	3	9	3	0	4	34.503	5.109	0.000771711615553993	0.00842289667064	0.3882	0.5459	up
OsTN11g001287	15	10	17	7	6	1	15	4	0.286	-1.804	0.0053742249549667	0.0375522862009815	0.175	0.3155	down
OsTN11g001314	64	18	22	132	81	161	36	113	3.145	1.653	0.00124309918125495	0.0121578297893352	0.1641	0.1685	up
OsTN11g001358	11	0	14	0	1	0	9	0	0.044	-4.501	0.00241449340871466	0.0202288277258409	0.8801	0.5182	down
OsTN11g001360	20	25	26	164	139	151	25	137	5.365	2.424	5.21124771393718e-05	0.000974558467984707	0.2159	0.1535	up
OsTN11g001370	174	145	175	44	14	11	176	23	0.131	-2.928	2.33201658811998e-06	7.21971909259278e-05	0.2237	0.115	down
OsTN11g001371	37	27	19	9	11	3	29	7	0.236	-2.081	0.000354812832810964	0.00454928400569656	0.1637	0.2082	down
OsTN11g001384	0	0	0	0	7	32	0	10	80.986	6.34	0.000200317545489352	0.00290153869865511	0.7837	0.2361	up
OsTN11g001418	12	6	5	11	41	41	8	25	3.092	1.628	0.00330941313741669	0.0258464987309917	0.1458	0.2033	up
OsTN11g001439	67	71	50	104	167	210	67	135	2.033	1.023	0.0064372419894834	0.0429927917497272	0.0893	0.1304	up
OsTN11g001443	0	0	0	0	10	7	0	4	36.057	5.172	0.00161180234934738	0.0149068872318404	0.623	0.4624	up
OsTN11g001455	1	0	0	1	16	6	0	6	12.938	3.694	0.00356870394222626	0.0274905573929503	0.4966	0.4854	up
OsTN11g001456	0	0	0	0	9	4	0	3	28.16	4.816	0.0022949482371898	0.0195066001066469	0.4679	0.4963	up
OsTN11g001486	62	50	30	13	4	0	50	6	0.114	-3.129	7.1084119118321e-06	0.000184288620310786	0.2411	0.216	down
OsTN11g001509	8	6	10	0	0	2	9	1	0.078	-3.673	0.000732822549405687	0.00808420744438018	0.4052	1.0399	down
OsTN11g001510	42	27	14	0	20	8	29	7	0.256	-1.966	0.00331051500856671	0.0258464987309917	0.247	0.2099	down
OsTN11g001511	122	135	99	65	86	55	127	61	0.478	-1.065	0.00305655371055635	0.0242772788538459	0.0802	0.1315	down
OsTN11g001530	21	12	19	66	51	78	18	59	3.138	1.65	0.000229303774094202	0.0032013463707806	0.1071	0.2025	up
OsTN11g001535	81	60	77	168	189	283	78	185	2.383	1.253	0.00571807477365978	0.0393456235317985	0.1354	0.1267	up
OsTN11g001557	4	0	0	1	43	169	1	54	36.704	5.198	4.20574646930938e-05	0.000813788917651861	0.7103	0.1731	up
OsTN11g001578	0	1	1	2	34	5	1	10	12.557	3.65	0.00331140364276439	0.0258464987309917	0.6319	0.2046	up
OsTN11g001581	166	142	139	69	75	89	158	68	0.429	-1.219	0.000425275909029162	0.0052557262253971	0.0748	0.115	down
OsTN11g001587	434	681	284	87	159	159	497	114	0.229	-2.125	4.0978539606814e-05	0.000797506911954633	0.1743	0.1624	down
OsTN11g001588	611	860	291	112	201	212	621	147	0.237	-2.075	0.000160239999678238	0.00242556008078259	0.1983	0.1706	down
OsTN11g001610	385	112	114	0	6	1	208	2	0.01	-6.69	1.34682088479091e-15	4.262989627427e-13	0.2609	0.1581	down
OsTN11g001628	147	63	27	5	9	0	81	4	0.052	-4.267	1.25250616153397e-08	7.97654599629156e-07	0.2621	0.2048	down
OsTN11g001637	174	133	129	76	79	89	154	72	0.466	-1.102	0.00162351872315538	0.0149888659106122	0.0771	0.1171	down
OsTN11g001640	25	8	8	0	0	2	14	1	0.048	-4.381	2.13090178523514e-05	0.0004707295224946	0.3547	0.3914	down
OsTN11g001641	99	68	41	3	30	35	72	18	0.249	-2.007	8.71189770983032e-05	0.00148515445926344	0.1524	0.1975	down
OsTN11g001643	12	16	39	39	96	97	25	63	2.604	1.381	0.00440631537335682	0.0322565565049871	0.1385	0.185	up
OsTN11g001660	0	0	2	8	28	18	1	15	17.633	4.14	8.7172334247963e-06	0.000220079010999589	0.2448	0.3244	up
OsTN11g001665	2	1	59	188	214	210	24	180	7.644	2.934	0.000441364073993284	0.00541040920067952	0.4184	0.1156	up
OsTN11g001666	2	0	13	30	67	84	6	50	8.941	3.16	2.21306372027555e-07	9.59763646541585e-06	0.1681	0.2025	up
OsTN11g001691	0	0	5	2	10	34	2	12	6.223	2.638	0.00756264681322145	0.0485121146303652	0.4422	0.2333	up
OsTN11g001715	24	42	33	2	7	3	36	3	0.097	-3.37	2.20708148853403e-05	0.000484529783926928	0.306	0.2116	down
OsTN11g001772	186	166	144	46	122	80	176	68	0.391	-1.353	0.000273037260364057	0.00371173152598754	0.088	0.1191	down
OsTN11g001785	94	65	50	349	510	433	73	373	5.087	2.347	2.25112636589417e-07	9.72294029358812e-06	0.1281	0.1197	up
OsTN11g001796	61	90	76	224	197	272	81	206	2.523	1.335	0.000364782130264454	0.00465459364411449	0.0899	0.1168	up
OsTN11g001808	8	13	4	43	33	44	9	36	4.02	2.007	0.000384108593450497	0.00484004215169619	0.1597	0.2092	up
OsTN11g001817	64	45	14	523	542	1034	42	603	14.161	3.824	1.62432312384775e-07	7.40796139514824e-06	0.2999	0.161	up
OsTN11g001824	22	9	10	40	57	68	14	47	3.267	1.708	0.000479157302572069	0.00577173873953051	0.1263	0.2041	up
OsTN11g001826	43	58	44	8	1	5	52	5	0.085	-3.559	1.14837508889659e-08	7.37987591219091e-07	0.1699	0.1962	down
OsTN11g001900	105	123	219	0	0	0	163	0	0.001	-10.344	5.04674507726934e-33	5.35131614268254e-29	0.1147	0.1194	down
OsTN11g001914	0	6	0	0	512	93	2	148	64.701	6.016	0.000182333132471341	0.00269084115540691	1.1511	0.1159	up
OsTN11g001917	0	0	0	4	3	3	0	3	25.046	4.647	0.00661734022889671	0.0438817805610421	0.7118	1.6228	up
OsTN11g001960	1	0	0	1	3	29	0	8	18.616	4.218	0.00746842740496787	0.0480822525735136	1.0371	0.186	up
OsTN11g001965	47	75	46	23	35	18	60	22	0.369	-1.439	0.00267891253568945	0.0218168674507696	0.134	0.2014	down
OsTN11g001983	37	39	18	2	1	0	33	1	0.032	-4.976	9.45844481847106e-05	0.00158690853849142	0.7004	0.2371	down
OsTN11g001999	1	0	2	4	6	31	1	11	9.362	3.227	0.00207378729923594	0.0179872422310415	0.434	0.5781	up
OsTN11g002005	9	1	3	242	295	213	4	222	47.762	5.578	1.65320085842193e-18	9.73873072348719e-16	0.162	0.1533	up
OsTN11g002013	449	231	103	63	165	80	268	86	0.32	-1.645	0.00285745962713023	0.022986382510645	0.2027	0.1237	down
OsTN11g002020	182	162	152	342	666	750	176	489	2.78	1.475	0.000217645654388869	0.00308678253086017	0.1067	0.1493	up
OsTN11g002026	454	242	273	7	53	13	339	19	0.057	-4.134	4.9518625313852e-06	0.00013567719470683	0.4478	0.1258	down
OsTN11g002027	659	291	435	55	252	150	485	122	0.251	-1.992	0.000295354571251977	0.00394184039807469	0.1996	0.1407	down
OsTN11g002029	186	212	136	80	69	124	189	80	0.422	-1.244	0.00130604507109835	0.0126471679556085	0.0971	0.115	down
OsTN11g002031	0	1	1	14	33	107	1	41	48.846	5.61	4.16216675215351e-08	2.28080285046304e-06	0.3492	0.204	up
OsTN11g002054	8	3	10	0	0	3	7	1	0.125	-2.998	0.00590080630042993	0.0403022219688301	0.4736	0.606	down
OsTN11g002079	19	12	15	0	4	1	16	1	0.09	-3.471	0.000269864489243301	0.00367566873691888	0.3914	0.7164	down
OsTN11g002081	4	0	2	13	24	12	2	14	6.385	2.675	0.00368912259191193	0.0281776970782232	0.3827	0.2871	up
OsTN11g002097	241	190	146	1095	1387	1814	203	1234	6.083	2.605	1.78956124815073e-08	1.08432072541521e-06	0.1349	0.1877	up
OsTN11g002109	0	0	4	2	40	19	2	15	9.964	3.317	0.000552107653910643	0.00647596627017865	0.3771	0.2849	up
OsTN11g002117	801	690	521	222	290	333	709	243	0.343	-1.542	1.09330088956922e-05	0.00026711557563473	0.0824	0.171	down
OsTN11g002118	4462	4219	3969	1119	1148	1025	4494	985	0.219	-2.191	5.73053870609276e-07	2.14334275732115e-05	0.1263	0.1629	down
OsTN11g002153	8	6	17	19	61	67	12	40	3.539	1.823	0.000572681487371169	0.00666201662242479	0.1443	0.2029	up
OsTN11g002177	36	49	37	4	33	23	44	16	0.367	-1.447	0.00769768216794299	0.0492145751388504	0.1723	0.2035	down
OsTN11g002178	9	6	2	0	0	0	6	0	0.021	-5.585	0.00097311156835863	0.0101409223735535	0.8992	1.2259	down
OsTN11g002179	369	334	365	0	50	7	380	14	0.038	-4.728	1.69664635302452e-06	5.52700141453011e-05	0.5045	0.1418	down
OsTN11g002200	6	0	10	13	38	25	6	21	3.6	1.848	0.00733913259292146	0.0475409620025829	0.237	0.2372	up
OsTN11g002202	5	7	9	86	37	107	8	70	9.15	3.194	6.02946183732721e-06	0.000161041306277328	0.26	0.1917	up
OsTN11g002207	40	36	30	14	11	21	37	14	0.36	-1.474	0.00481033287818169	0.0344870619836373	0.149	0.206	down
OsTN11g002225	0	51	0	0	0	0	19	0	0.007	-7.226	0.00533667016452379	0.0373390841897249	2.9088	1.1991	down
OsTN11g002247	105	65	32	107	210	237	70	154	2.201	1.138	0.00421206769352552	0.0311553409353553	0.102	0.1242	up
OsTN11g002264	26	8	52	0	3	0	31	1	0.03	-5.059	5.59176032765564e-06	0.000151642533591551	0.4989	0.1997	down
OsTN11g002291	13	14	6	2	2	1	12	1	0.136	-2.88	0.00461705375076243	0.0334862718510324	0.4689	0.7816	down
OsTN11g002301	6	7	26	31	79	47	15	44	3.048	1.608	0.00213598011409252	0.0184137114957561	0.1489	0.2016	up
OsTN11g002328	0	0	0	2	18	3	0	6	49.661	5.634	0.000294743736092114	0.00393616524641401	0.5089	0.2292	up
OsTN11g002344	138	319	5	14	22	23	163	17	0.104	-3.268	0.000127909253856733	0.00204567989935123	0.4243	0.1675	down
OsTN11g002372	2	2	0	96	88	84	1	81	52.945	5.726	3.56769655503029e-09	2.59110071378518e-07	0.3589	0.2068	up
OsTN11g002378	58	66	91	136	227	296	78	185	2.386	1.254	0.000435088285135954	0.00534893754369749	0.0806	0.116	up
OsTN11g002379	20	21	8	286	78	266	17	200	11.541	3.529	1.27660186045952e-07	5.98957868468251e-06	0.2461	0.1622	up
OsTN11g002383	15	6	0	0	0	0	7	0	0.017	-5.841	0.00739855422577082	0.0477370331561409	2.1211	2.1504	down
OsTN11g002391	153	610	252	79	137	83	368	86	0.233	-2.099	0.000134964801647701	0.00212486900411491	0.196	0.1238	down
OsTN11g002407	6	5	1	81	154	137	4	105	24.168	4.595	8.84079770280811e-14	1.83810585179854e-11	0.1555	0.186	up
OsTN11g002411	41	4	37	2	1	2	29	2	0.055	-4.179	3.75841758649434e-05	0.000742821637994273	0.4541	0.2909	down
OsTN11g002423	19	14	281	1	6	33	119	10	0.089	-3.49	0.00016979755774806	0.00254404583747966	0.49	0.1151	down
OsTN11g002425	0	0	0	17	24	45	0	24	193.838	7.599	2.06501142746625e-09	1.59246172153734e-07	0.2815	0.2458	up
OsTN11g002426	3107	3746	849	37	9	32	2690	25	0.009	-6.753	2.14265281367506e-09	1.64634921085532e-07	0.5496	0.1862	down
OsTN11g002430	46	48	37	8	27	16	46	14	0.304	-1.717	0.000828735004285811	0.00886604355541568	0.1463	0.2048	down
OsTN11g002432	79	113	56	12	27	16	88	15	0.177	-2.5	2.01962727363183e-05	0.000451319658502741	0.1987	0.1997	down
OsTN11g002435	90	36	37	8	25	22	56	15	0.268	-1.898	0.00325281095985219	0.0254641424974475	0.2521	0.2099	down
OsTN11g002461	180	0	0	2	2	4	58	2	0.042	-4.587	0.0016973910060701	0.015469089413721	1.0837	0.1776	down
OsTN11g002513	141	158	113	275	418	511	146	341	2.331	1.221	0.00460505169005936	0.0334187892265759	0.1256	0.1266	up
OsTN11g002518	357	48	166	64	96	50	196	61	0.313	-1.674	0.0026977386840225	0.0219283036688636	0.2046	0.126	down
OsTN11g002523	170	397	103	52	30	43	239	39	0.163	-2.62	0.00556922589073292	0.0385843101812391	0.562	0.1433	down
OsTN11g002525	0	31	1	0	0	0	12	0	0.011	-6.561	0.00639015455289438	0.0428035399883863	2.5776	1.7152	down
OsTN11g002528	11	45	0	1	0	0	20	0	0.023	-5.455	0.00546163056445912	0.0380252131912293	1.7122	1.0893	down
OsTN11g002554	0	2	14	15	40	65	6	32	5.374	2.426	0.00105085343464437	0.0107555254770768	0.2868	0.203	up
OsTN11g002556	2	33	0	0	0	0	13	0	0.01	-6.677	0.0043290526391152	0.0318302765732619	2.346	1.6268	down
OsTN11g002578	27	32	308	0	10	0	138	2	0.019	-5.702	0.000262106787434857	0.00359076139607946	1.1396	0.1327	down
OsTN11g002580	17	15	1	0	0	0	11	0	0.011	-6.522	3.43661606267683e-05	0.000694180584625201	0.6815	1.0713	down
OsTN11g002581	15	16	6	2	0	0	13	1	0.059	-4.095	0.00115069193028384	0.0114731345517303	0.6522	0.5391	down
OsTN11g002601	1425	1244	1316	444	655	428	1416	445	0.314	-1.671	0.000175726882242079	0.00261518595909317	0.1345	0.1893	down
OsTN11g002602	2089	1693	2405	935	1356	1234	2210	1016	0.459	-1.122	0.00570858000110715	0.0393185631969728	0.1153	0.1648	down
OsTN11g002608	0	0	0	0	14	1	0	4	31.209	4.964	0.00741789261155567	0.0478081582907576	1.1046	0.9975	up
OsTN11g002610	2719	4412	2245	18014	16609	23269	3343	17118	5.12	2.356	9.21962570148377e-08	4.57893682087509e-06	0.1268	0.1253	up
OsTN11g002614	9	3	14	44	54	78	9	50	5.364	2.423	5.62361523428748e-05	0.00103436814471676	0.1901	0.2033	up
OsTN12g000003	49	3	1	1	0	0	17	0	0.025	-5.294	0.00103474940511764	0.0106163186426366	1.0628	0.8609	down
OsTN12g000008	86	39	34	3	8	19	55	8	0.15	-2.735	9.40861298223203e-05	0.00158230337441867	0.273	0.2034	down
OsTN12g000016	905	94	87	36	92	56	359	51	0.143	-2.811	1.34523372434097e-05	0.00031946664716796	0.2562	0.1158	down
OsTN12g000037	42	41	33	107	148	178	41	124	3.005	1.587	3.6891805556888e-05	0.000733237601166751	0.0878	0.1518	up
OsTN12g000043	483	228	407	3252	2059	2104	394	2328	5.899	2.561	6.33664220436793e-06	0.000167140760233869	0.2055	0.1863	up
OsTN12g000045	132	38	53	842	1008	1067	77	852	11.072	3.469	2.19894170833684e-09	1.68350024580142e-07	0.1956	0.1581	up
OsTN12g000047	253	184	227	85	118	75	235	81	0.346	-1.532	0.000408490134992467	0.00509865068982721	0.1228	0.1165	down
OsTN12g000054	2	8	5	20	37	27	6	24	4.331	2.115	0.00198898162520694	0.0174900491813224	0.2279	0.204	up
OsTN12g000055	0	1	1	52	139	222	1	111	132.698	7.052	1.11864751111928e-16	4.65159956241304e-14	0.2037	0.1535	up
OsTN12g000069	6	1	2	8	21	19	3	13	4.106	2.038	0.00751656701821557	0.0482822412829672	0.2522	0.4345	up
OsTN12g000070	7	6	5	14	37	63	7	31	4.771	2.254	0.000803049599576721	0.00867563568936501	0.2313	0.2032	up
OsTN12g000083	38	35	51	8	32	23	45	17	0.389	-1.361	0.00217057565904047	0.0186361935227819	0.1054	0.2022	down
OsTN12g000086	0	0	0	1	13	5	0	5	40.552	5.342	0.00217159836049931	0.018637428745896	0.8382	0.9385	up
OsTN12g000114	6	0	0	0	209	43	2	62	29.486	4.882	0.0035104571654223	0.0270910717274785	1.3903	0.1181	up
OsTN12g000120	22	38	37	274	158	249	35	210	5.985	2.581	0.000147148419303188	0.00227116195645029	0.2847	0.1409	up
OsTN12g000123	86	57	49	16	15	22	67	16	0.231	-2.117	1.11853868895405e-05	0.000272445382426347	0.1265	0.1921	down
OsTN12g000135	4	7	222	422	674	783	89	531	5.977	2.579	0.00225304167731512	0.0192120043630164	0.4525	0.1399	up
OsTN12g000144	26	22	6	1	1	0	19	1	0.038	-4.726	6.30134004057378e-05	0.00114070743177824	0.5362	0.725	down
OsTN12g000148	13	2	2	0	0	0	6	0	0.021	-5.544	0.00596121487584113	0.0405841039717377	1.7057	2.2257	down
OsTN12g000149	63	10	1	0	0	1	24	0	0.016	-5.927	5.6237396654804e-05	0.00103436814471676	0.8068	0.6437	down
OsTN12g000171	7	4	5	19	40	17	6	22	3.765	1.913	0.00402164525268456	0.0300730010132868	0.2139	0.2047	up
OsTN12g000185	59	25	29	5	29	19	39	14	0.366	-1.45	0.0021255443562932	0.0183610668692097	0.1183	0.2032	down
OsTN12g000186	89	90	96	31	47	19	98	29	0.29	-1.788	5.73598674161333e-05	0.00105318676042765	0.1166	0.1521	down
OsTN12g000190	34	43	20	5	23	11	34	10	0.312	-1.679	0.00314000682638806	0.0248100315824186	0.1767	0.2043	down
OsTN12g000192	67	87	87	286	254	422	87	283	3.263	1.706	0.00062458305193564	0.0071135269563751	0.1633	0.1152	up
OsTN12g000203	24	22	13	97	130	161	21	111	5.323	2.412	2.4412685288204e-06	7.50318575227451e-05	0.1496	0.1679	up
OsTN12g000209	0	0	10	18	37	24	4	22	5.871	2.554	0.00122126894007521	0.012001598893501	0.2973	0.2381	up
OsTN12g000212	29	25	31	0	2	2	30	1	0.041	-4.613	2.05300163640167e-11	2.92201380558189e-09	0.1324	0.2144	down
OsTN12g000223	393	565	289	50	376	206	443	164	0.371	-1.43	0.00519349456750728	0.0365665469100687	0.1783	0.171	down
OsTN12g000237	55	50	66	31	16	15	61	20	0.321	-1.64	0.00550710263029074	0.0382664238140811	0.2116	0.1849	down
OsTN12g000241	88	91	118	25	42	53	107	34	0.317	-1.657	0.00207983520727869	0.0180175920101141	0.1836	0.1588	down
OsTN12g000242	61	50	78	12	23	18	68	15	0.222	-2.168	0.00368979416165539	0.0281776970782232	0.3428	0.1996	down
OsTN12g000243	63	76	57	8	28	22	70	16	0.228	-2.133	0.000281619704994768	0.00379676356250734	0.2038	0.1959	down
OsTN12g000249	45	44	31	4	1	6	42	4	0.078	-3.678	5.62107581409167e-10	5.2518509991444e-08	0.1347	0.2032	down
OsTN12g000250	26	21	11	5	7	9	20	6	0.299	-1.743	0.00700244930911502	0.0459470737928225	0.2077	0.2781	down
OsTN12g000291	47	44	41	9	41	13	47	17	0.368	-1.443	0.00479626586314749	0.0343978390800706	0.151	0.2007	down
OsTN12g000298	36	48	63	15	25	34	53	21	0.393	-1.347	0.00656485628355459	0.0435882614919669	0.1441	0.2031	down
OsTN12g000308	6	0	2	9	28	27	3	17	6.052	2.598	0.000618478033765332	0.00706355120891764	0.243	0.2358	up
OsTN12g000361	20	8	7	42	79	104	12	62	5.11	2.353	0.000279064488773362	0.00376799243810469	0.2395	0.2035	up
OsTN12g000366	71	73	75	12	5	12	78	9	0.114	-3.134	6.02887218115848e-06	0.000161041306277328	0.2592	0.1948	down
OsTN12g000373	36	12	9	42	98	66	19	57	2.92	1.546	0.00319947110654912	0.0251486967222339	0.1614	0.2023	up
OsTN12g000375	541	379	419	169	146	172	473	146	0.309	-1.694	8.4469054280505e-05	0.00145047387378678	0.1232	0.1439	down
OsTN12g000377	779	615	569	187	226	189	693	177	0.256	-1.967	1.13421931258573e-05	0.000275525646758369	0.1321	0.1685	down
OsTN12g000393	33	41	23	65	149	152	34	101	2.933	1.552	0.000159395966767917	0.00241796156455452	0.0998	0.1687	up
OsTN12g000403	3	102	6	1	7	1	41	2	0.063	-3.999	0.00376425458751269	0.028653462683913	1.0151	0.2551	down
OsTN12g000407	0	2	1	1	82	0	1	20	16.983	4.086	0.00456488102955869	0.0332282907935605	1.0024	0.2039	up
OsTN12g000409	0	0	1	0	60	1	0	15	30.969	4.953	0.00203324653024444	0.0177517740497711	1.0499	0.2072	up
OsTN12g000425	25	13	20	64	110	128	20	85	4.126	2.045	5.13616593354117e-07	1.94158058739051e-05	0.0872	0.1812	up
OsTN12g000433	1147	1145	797	165	535	388	1092	295	0.27	-1.888	0.000337632842659987	0.00438005047136041	0.1856	0.1878	down
OsTN12g000435	1629	1869	1418	231	820	641	1749	454	0.26	-1.942	0.000628706114326815	0.0071454746403136	0.216	0.1861	down
OsTN12g000484	0	0	2	5	15	6	1	7	8.632	3.11	0.00705405054275254	0.0461998918653963	0.4873	0.6814	up
OsTN12g000498	14	5	9	0	1	0	10	0	0.041	-4.623	0.00011627849717421	0.00188525847826718	0.4433	0.9459	down
OsTN12g000520	99	89	49	31	56	23	83	32	0.382	-1.389	0.00128162736488397	0.0124448129702813	0.1115	0.1695	down
OsTN12g000530	0	6	14	0	0	0	8	0	0.016	-5.928	0.000309650156722847	0.00408380029454068	0.7934	1.0454	down
OsTN12g000537	159	55	40	26	30	19	86	23	0.258	-1.957	0.000551026063851251	0.00646685652246457	0.195	0.2064	down
OsTN12g000582	165	108	68	275	327	376	118	285	2.394	1.259	0.00117360014284772	0.0116247259361847	0.0999	0.117	up
OsTN12g000585	144	122	58	190	563	357	113	303	2.683	1.424	0.000503701361062087	0.00602141756710467	0.1109	0.1209	up
OsTN12g000591	4	25	0	0	0	0	10	0	0.012	-6.395	0.000403807488677709	0.00504926026673831	1.097	0.985	down
OsTN12g000592	154	146	124	52	86	42	151	52	0.347	-1.527	3.73469535461062e-05	0.000739511525539005	0.0841	0.1449	down
OsTN12g000595	262	144	98	19	31	26	174	22	0.125	-3.001	3.76822083858842e-09	2.71811766407975e-07	0.1461	0.173	down
OsTN12g000607	37	105	73	36	17	36	78	27	0.348	-1.521	0.00124903463052846	0.0122009568906573	0.1325	0.1617	down
OsTN12g000633	5	13	1	53	91	93	7	67	9.77	3.288	0.00464215364092514	0.0335879059239507	0.7736	0.2039	up
OsTN12g000634	41	41	12	130	156	221	33	146	4.429	2.147	7.72644124085547e-05	0.00134859785510142	0.1813	0.1693	up
OsTN12g000643	13	21	19	7	4	0	19	4	0.187	-2.419	0.00364982724517874	0.0280035768409933	0.3437	0.2156	down
OsTN12g000656	707	489	617	4155	961	1410	642	2242	3.491	1.804	0.00238177836556978	0.0200351888183	0.2382	0.1892	up
OsTN12g000657	76	45	53	273	103	175	61	178	2.893	1.532	0.00243119022714375	0.0203065187660644	0.1664	0.1626	up
OsTN12g000682	2	3	2	2	60	39	2	25	9.892	3.306	4.1666702029434e-05	0.000807701782393242	0.281	0.2063	up
OsTN12g000685	1322	1438	1078	7611	11669	15755	1362	9873	7.246	2.857	3.00140488847858e-05	0.000621363966694439	0.2935	0.1459	up
OsTN12g000690	223	82	71	1152	1498	1578	129	1224	9.478	3.245	1.27891438766785e-08	8.0720051843072e-07	0.1946	0.1672	up
OsTN12g000692	62	76	45	156	280	280	65	202	3.101	1.633	5.24981167355923e-05	0.000980041867615939	0.103	0.1258	up
OsTN12g000722	8	5	18	144	177	303	11	177	15.617	3.965	2.4290527854993e-05	0.000522443432272653	0.4776	0.1755	up
OsTN12g000741	23	16	13	6	3	0	18	3	0.163	-2.621	0.00425936468176549	0.0314076310174551	0.4212	0.3803	down
OsTN12g000750	7	2	10	18	28	34	7	22	3.303	1.724	0.00237119567378561	0.0199665599114986	0.1431	0.2564	up
OsTN12g000752	31	51	33	10	10	8	41	8	0.202	-2.307	2.16541211684817e-05	0.000476430342243221	0.1452	0.2015	down
OsTN12g000757	3257	2973	2933	741	1263	1226	3255	914	0.281	-1.833	1.31043984216774e-05	0.000313662502628117	0.1191	0.1753	down
OsTN12g000809	24	13	0	0	0	0	12	0	0.01	-6.657	0.00132266335639232	0.0127672834770196	1.6505	1.4871	down
OsTN12g000821	45	78	381	17	21	11	189	14	0.077	-3.691	2.76889577456106e-08	1.59132717320098e-06	0.2392	0.1167	down
OsTN12g000822	6	2	6	0	0	1	5	0	0.08	-3.652	0.00498427321500198	0.0353990227965663	0.5512	0.5869	down
OsTN12g000844	35	41	22	5	17	17	35	10	0.311	-1.684	0.00175643800602952	0.0159046886395679	0.1539	0.208	down
OsTN12g000850	0	0	7	28	62	66	3	43	16.088	4.008	5.87169174119882e-07	2.17693997824481e-05	0.2726	0.2076	up
OsTN12g000851	259	172	105	1273	1538	724	186	1064	5.707	2.513	1.72801279480227e-05	0.000395744787682199	0.2181	0.1655	up
OsTN12g000863	12	2	5	16	32	31	7	22	3.302	1.724	0.00391181613223642	0.0294281251210847	0.1671	0.2412	up
OsTN12g000865	1191	1067	700	464	716	543	1040	497	0.477	-1.067	0.0041956458881138	0.0310782613863881	0.0965	0.1893	down
OsTN12g000872	11	8	8	22	77	55	10	41	4.332	2.115	0.00051100117034638	0.00609378345719659	0.1988	0.1792	up
OsTN12g000873	33	10	61	177	93	285	38	166	4.39	2.134	0.000475060326961898	0.00573724621519417	0.2347	0.1534	up
OsTN12g000899	1	4	7	3	35	37	4	19	4.381	2.131	0.00295883151609426	0.0236160857966921	0.2423	0.218	up
OsTN12g000902	3	3	4	10	24	30	4	18	4.81	2.266	0.00114214030653335	0.0114195190324246	0.2043	0.2108	up
OsTN12g000938	4	6	16	1	0	0	10	0	0.044	-4.493	0.000350943751911471	0.00451990728318714	0.5166	0.3874	down
OsTN12g000939	31	0	7	0	0	0	13	0	0.01	-6.68	0.000561748078147045	0.00655280060135554	1.3396	1.3443	down
OsTN12g000971	0	0	0	0	13	14	0	7	55.897	5.805	0.0010817712394171	0.0109766137197695	0.9137	0.9186	up
OsTN12g000975	0	0	0	0	8	0	0	2	18.058	4.175	0.00768674729462338	0.0491743136884097	0.3332	0.1489	up
OsTN12g000986	69	55	93	1	9	12	78	6	0.078	-3.674	3.94024972425582e-11	5.12643410443517e-09	0.1426	0.169	down
OsTN12g000989	0	4	13	0	1	0	6	0	0.061	-4.024	0.00522765369370648	0.0367722816676908	0.8067	1.2754	down
OsTN12g000991	330	245	215	41	93	152	278	78	0.281	-1.83	4.81504694530087e-06	0.000132715089039766	0.1026	0.1194	down
OsTN12g000996	36	1	4	0	1	1	14	1	0.049	-4.361	0.0038652988084769	0.0291816987651725	1.0551	1.3277	down
OsTN12g001005	58	33	12	0	0	1	35	0	0.011	-6.45	1.41821733196061e-09	1.14357927600337e-07	0.3206	0.4871	down
OsTN12g001020	766	1038	976	168	140	157	999	141	0.141	-2.829	4.22284939219035e-07	1.64621262978273e-05	0.1939	0.1859	down
OsTN12g001021	382	446	377	92	132	124	430	100	0.233	-2.101	8.33910657727149e-09	5.54377792481836e-07	0.084	0.1348	down
OsTN12g001027	23	41	0	0	0	0	22	0	0.006	-7.491	0.000276856155115795	0.00374205766828595	1.4964	1.0105	down
OsTN12g001052	32	24	30	91	90	141	30	94	3.063	1.615	0.000511191624008711	0.00609378345719659	0.1297	0.1931	up
OsTN12g001065	0	0	0	0	38	0	0	9	75.831	6.245	0.00249725546914107	0.0207033998178556	1.5238	0.2883	up
OsTN12g001114	22	17	22	151	237	270	22	186	8.551	3.096	5.71353167967086e-07	2.14075735566749e-05	0.2194	0.1423	up
OsTN12g001129	61	36	52	21	26	3	53	15	0.288	-1.794	0.00167001856124867	0.0153037020776485	0.1886	0.1978	down
OsTN12g001131	36	153	0	0	0	0	67	0	0.002	-9.076	1.4388417554691e-06	4.82808815003691e-05	1.0368	0.2992	down
OsTN12g001145	109	70	77	47	49	19	90	36	0.389	-1.363	0.00569099365829571	0.0392484235809681	0.1521	0.143	down
OsTN12g001169	135	57	0	0	0	0	64	0	0.002	-9.009	8.09409772711486e-07	2.88005923655914e-05	0.9597	0.3081	down
OsTN12g001197	0	0	7	48	21	35	3	33	12.15	3.603	0.000219974500560623	0.0031079275372346	0.4552	0.2538	up
OsTN12g001206	83	64	47	97	287	257	68	174	2.555	1.354	0.000383372218662271	0.00483398773662712	0.0922	0.125	up
OsTN12g001229	234	275	270	907	894	1155	279	872	3.124	1.643	0.000111849922796837	0.00182461639442501	0.1218	0.179	up
OsTN12g001232	243	349	89	1075	949	1662	239	1081	4.51	2.173	0.00028848445616601	0.00386718701764386	0.2357	0.1882	up
OsTN12g001254	32	0	8	0	1	1	13	1	0.05	-4.33	0.000269697783571673	0.00367566873691888	0.5524	0.5559	down
OsTN12g001264	289	549	1095	32	16	2	713	17	0.024	-5.4	2.28130806506817e-08	1.34015789850141e-06	0.4511	0.158	down
OsTN12g001270	6	9	0	8	88	66	5	41	7.779	2.96	0.0012530658194558	0.012227317888536	0.4626	0.2191	up
OsTN12g001275	68	14	47	3	1	3	45	2	0.049	-4.353	2.58493314427148e-06	7.83123959865218e-05	0.384	0.2325	down
OsTN12g001289	67	86	86	34	52	47	86	38	0.445	-1.169	0.000921583227504626	0.00968964576385256	0.0711	0.172	down
OsTN12g001291	30	28	67	212	90	302	46	183	4.014	2.005	0.000479277216028351	0.00577173873953051	0.2095	0.1197	up
OsTN12g001339	13	14	18	45	90	127	16	72	4.459	2.157	6.65027750743539e-05	0.00119115232348127	0.165	0.2009	up
OsTN12g001376	84	7	0	0	0	0	30	0	0.004	-7.894	0.000758183573601503	0.00830945687099073	2.0517	0.5655	down
OsTN12g001429	6	7	0	15	20	42	5	22	4.647	2.216	0.00110531526125125	0.0111727458271474	0.2124	0.2197	up
OsTN12g001443	0	0	0	0	14	0	0	3	29.961	4.905	0.00167881564176581	0.0153493377916139	0.4461	0.1798	up
OsTN12g001453	1469	120	214	83	88	55	598	68	0.114	-3.132	5.28562965492348e-06	0.000143892616292634	0.285	0.1233	down
OsTN12g001467	16	13	44	2	12	5	27	5	0.197	-2.344	0.00182637998607395	0.0163841118293867	0.302	0.2355	down
OsTN12g001512	31	11	29	3	10	10	25	6	0.257	-1.96	0.000655165016855207	0.00735915493244087	0.1561	0.2094	down
OsTN12g001530	88	80	62	98	284	307	81	186	2.297	1.199	0.00107849609507108	0.0109633084450365	0.0865	0.1159	up
OsTN12g001532	206	179	199	104	110	74	208	87	0.417	-1.262	0.00777871849732409	0.0495981007735273	0.1501	0.115	down
OsTN12g001538	122	80	48	151	374	404	87	254	2.92	1.546	0.00034595913053335	0.00447636075730369	0.1221	0.1183	up
OsTN12g001551	168	110	66	21	56	26	119	29	0.241	-2.054	0.000176312294937152	0.00261838574140909	0.1853	0.1672	down
OsTN12g001556	344	395	386	101	325	214	403	173	0.433	-1.208	0.00215391194429183	0.0185307578795148	0.1052	0.1567	down
OsTN12g001576	41	19	50	10	7	14	39	9	0.234	-2.092	0.00143589097900493	0.0136673877880419	0.2405	0.2123	down
OsTN12g001582	5	6	8	37	40	19	7	29	4.2	2.07	0.00284956194241095	0.0229512571639609	0.2528	0.2546	up
OsTN12g001585	96	86	131	62	42	44	113	46	0.406	-1.302	0.00531058975396987	0.0372057076023915	0.1387	0.1525	down
OsTN12g001586	4	1	0	18	25	67	2	30	16.399	4.036	1.7631876275156e-07	7.86512209991556e-06	0.2166	0.2056	up
OsTN12g001593	0	1	7	20	32	26	3	22	7.381	2.884	6.47528168989089e-05	0.00116571560948655	0.2109	0.236	up
OsTN12g001597	25	6	20	340	350	179	18	266	14.709	3.879	3.93933791866021e-10	3.88565298795475e-08	0.2045	0.1219	up
OsTN12g001603	103	76	71	23	6	18	88	15	0.167	-2.584	5.85784772857648e-07	2.17561080174994e-05	0.1453	0.1694	down
OsTN12g001615	85	32	43	125	220	176	55	148	2.655	1.409	0.000623707330143455	0.00711126954320013	0.1069	0.1426	up
OsTN12g001636	99	53	221	40	41	17	136	30	0.221	-2.175	0.0020184017931391	0.0176585176679459	0.3139	0.1398	down
OsTN12g001649	0	0	0	1	34	45	0	20	163.548	7.354	5.69494121095828e-06	0.000153654730611695	0.661	0.2061	up
OsTN12g001650	1	1	1	0	178	244	1	105	88.726	6.471	2.4082156272945e-05	0.000519014520406854	0.957	0.1155	up
OsTN12g001699	0	0	2	6	13	11	1	8	10.113	3.338	0.000574599350974409	0.0066806625197995	0.2522	0.475	up
OsTN12g001725	19	10	29	1	6	2	21	2	0.125	-3.002	3.23329371276533e-05	0.000663779862213111	0.2155	0.2841	down
OsTN12g001736	335	315	482	91	143	97	407	95	0.235	-2.09	0.000192499166189468	0.00280572496039865	0.2044	0.1384	down
OsTN12g001737	231	161	193	34	121	86	207	65	0.316	-1.664	0.000433948830646076	0.00534778774834573	0.1456	0.1169	down
OsTN12g001741	2	58	4	0	1	0	23	0	0.017	-5.9	0.00309908498209053	0.0245323983632676	1.7285	0.2506	down
OsTN12g001774	707	288	140	6	94	0	386	25	0.066	-3.914	5.0186710353232e-05	0.000944374060746221	0.5238	0.1152	down
OsTN12g001776	506	502	294	26	338	23	458	99	0.216	-2.213	0.00734900976496863	0.0475601584894493	0.4462	0.1479	down
OsTN12g001778	14	14	14	1	4	8	15	3	0.244	-2.033	0.00661080040372577	0.0438619655960889	0.2665	0.4609	down
OsTN12g001781	88	247	125	11	20	38	166	19	0.115	-3.114	5.19412087104335e-08	2.774602551945e-06	0.1854	0.1246	down
OsTN12g001782	876	2500	1263	265	172	202	1677	199	0.118	-3.08	2.73911188519564e-06	8.18145714779493e-05	0.2636	0.1872	down
OsTN12g001784	34	33	26	0	7	1	33	2	0.069	-3.848	1.07658214265544e-07	5.18888124983953e-06	0.2121	0.2054	down
OsTN12g001838	7	6	13	170	399	562	10	308	32.519	5.023	4.17749201457257e-14	9.52602937129467e-12	0.2054	0.1316	up
OsTN12g001856	16	5	27	2	0	0	17	1	0.043	-4.528	9.88962954717846e-05	0.00163851073286729	0.5137	0.2403	down
OsTN12g001867	471	523	56	13	34	15	363	17	0.048	-4.383	4.79879610080171e-08	2.58951829286773e-06	0.3404	0.1545	down
OsTN12g001870	0	0	0	0	6	8	0	3	29.838	4.899	0.00673345359937471	0.0444987069124149	0.9856	1.4492	up
OsTN12g001874	25	45	17	38	272	189	31	129	4.182	2.064	0.000805128025586008	0.0086892366608664	0.2378	0.1249	up
OsTN12g001875	86	139	45	143	731	513	96	365	3.822	1.934	0.00155544295036419	0.0145378046048362	0.2462	0.1469	up
OsTN12g001892	170	189	172	64	81	112	190	74	0.389	-1.363	0.000201999721451948	0.00291613893317322	0.0857	0.1166	down
OsTN12g001895	9	3	8	39	58	64	7	46	6.398	2.678	4.71676485963578e-05	0.000893111003377642	0.2225	0.1999	up
OsTN12g001896	18	9	29	66	87	124	20	79	3.909	1.967	0.000221046042010738	0.00311683737561284	0.1655	0.1975	up
OsTN12g001922	17	16	27	82	48	104	21	71	3.252	1.701	0.00183790228544837	0.0164526778250332	0.178	0.2027	up
OsTN12g001950	332	316	524	111	204	177	423	139	0.329	-1.605	0.000227535386799266	0.00318504485006734	0.1263	0.1861	down
OsTN12g001951	60	83	82	193	274	602	81	297	3.664	1.873	0.000444349837908309	0.00543758050347462	0.1856	0.1219	up
OsTN12g001956	347	267	318	88	161	130	331	107	0.325	-1.623	1.01528483235166e-05	0.000251506770247133	0.0879	0.1412	down
OsTN12g002036	94	55	41	243	566	731	66	420	6.355	2.668	1.92470719633421e-05	0.000434149039902824	0.2422	0.1495	up
OsTN12g002044	3	2	16	29	79	106	8	58	7.459	2.899	3.16362011499928e-06	9.20976644828115e-05	0.1949	0.1661	up
OsTN12g002070	40	0	75	6	7	10	42	7	0.162	-2.63	0.00280546935996189	0.022630958736256	0.4459	0.197	down
OsTN12g002071	7	0	0	33	31	37	2	30	11.94	3.578	6.30670039363711e-06	0.000166558150993602	0.2642	0.2302	up
OsTN12g002081	190	139	197	73	55	16	187	46	0.245	-2.026	0.000257039168091918	0.00352361321119929	0.1949	0.1153	down
OsTN12g002091	19	11	8	21	42	56	13	33	2.47	1.305	0.00598640456409508	0.0406772449826224	0.1122	0.2084	up
OsTN12g002112	372	357	318	666	941	1106	372	775	2.085	1.06	0.00664201795706603	0.0440037901928028	0.1057	0.1832	up
OsTN12g002141	4	0	2	32	48	62	2	40	18.048	4.174	8.1987470385362e-11	9.9925763474849e-09	0.1334	0.2047	up
OsTN12g002162	69	19	38	68	172	268	44	137	3.132	1.647	0.00274395878158998	0.0222273238659965	0.1948	0.1189	up
OsTN12g002185	0	0	0	0	11	4	0	4	31.919	4.996	0.00226736413479511	0.019310839842008	0.6021	1.0387	up
OsTN12g002197	17	30	15	4	8	8	22	6	0.258	-1.953	0.00448698859607343	0.0327445172597829	0.2431	0.4135	down
OsTN12g002200	2102	1995	2496	653	1014	996	2360	760	0.322	-1.635	2.54773481530367e-06	7.78527553719668e-05	0.0821	0.1776	down
OsTN12g002202	816	1021	621	334	524	332	873	345	0.395	-1.34	0.00472253247753411	0.0340070445674248	0.1549	0.1887	down
OsTN12g002205	44	9	60	181	131	149	40	142	3.492	1.804	0.00106310310455356	0.0108704086491163	0.1927	0.1453	up
OsTN12g002209	2	0	4	13	62	62	2	36	16.06	4.005	8.95005873539135e-07	3.14244860267292e-05	0.2718	0.2149	up
OsTN12g002228	205	152	121	30	42	40	168	33	0.192	-2.378	1.49954862282426e-09	1.20458059258463e-07	0.0885	0.1526	down
OsTN12g002231	209	340	217	34	142	128	274	81	0.297	-1.753	2.30220893993545e-05	0.000501777440793537	0.1109	0.1159	down
OsTN1g000022	125	173	163	54	61	62	166	52	0.313	-1.675	3.71296972337583e-05	0.000737033685990206	0.1026	0.1218	down
OsTN1g000023	1890	1617	2949	141	177	290	2327	173	0.074	-3.75	1.53552789216635e-17	7.57300930445854e-15	0.1105	0.1783	down
OsTN1g000033	468	454	573	217	284	336	536	241	0.45	-1.153	0.00278122990173966	0.0224606026375449	0.1018	0.1717	down
OsTN1g000043	7	0	4	38	13	15	4	22	5.488	2.456	0.0017712372234123	0.0160113502970608	0.2983	0.2644	up
OsTN1g000051	9	1	3	9	38	26	4	20	4.279	2.097	0.00470451582402525	0.0339233822101678	0.272	0.3055	up
OsTN1g000059	8	9	12	0	2	0	11	0	0.064	-3.958	0.000106999744057158	0.00175223441870281	0.3314	0.8681	down
OsTN1g000077	5	0	0	3	43	327	2	95	53.059	5.73	0.000117711553752385	0.00190222544510432	0.9913	0.1239	up
OsTN1g000078	0	0	0	2	11	80	0	24	192.652	7.59	2.44418740829301e-05	0.000524103967317187	0.9136	0.207	up
OsTN1g000090	20	32	109	1	9	0	60	3	0.048	-4.392	5.22536644996026e-08	2.78428005789717e-06	0.2928	0.2012	down
OsTN1g000104	12	168	116	22	11	42	110	22	0.202	-2.307	0.00299506006401687	0.023860345145607	0.3779	0.1311	down
OsTN1g000121	25	1	1	0	0	0	9	0	0.014	-6.162	0.00708740649358375	0.0463610825137047	2.3534	1.6062	down
OsTN1g000122	20	0	0	0	0	0	6	0	0.019	-5.724	0.00560585954400343	0.038762133469084	1.8139	1.7733	down
OsTN1g000131	53	45	49	15	30	27	52	20	0.389	-1.361	0.00111773714389661	0.0112553901284973	0.0937	0.1938	down
OsTN1g000136	175	55	142	259	428	818	131	415	3.175	1.667	0.000349549625081396	0.00450906259069414	0.1444	0.1217	up
OsTN1g000144	21	81	16	10	18	12	42	11	0.271	-1.883	0.00182253835852124	0.0163565683322725	0.2067	0.2056	down
OsTN1g000158	63	91	20	13	18	22	61	15	0.249	-2.006	0.00179776164881075	0.0161684186964926	0.2481	0.2039	down
OsTN1g000159	66	70	9	15	10	22	50	14	0.277	-1.852	0.00307342614320474	0.0243790764063877	0.2313	0.2083	down
OsTN1g000198	26	16	6	1	1	1	16	1	0.059	-4.075	0.000100792191828195	0.00166731670210649	0.434	0.2834	down
OsTN1g000200	366	401	217	20	250	90	347	92	0.266	-1.913	0.00683914135316273	0.0450707491225985	0.3326	0.1275	down
OsTN1g000204	281	299	255	67	119	148	297	93	0.315	-1.668	4.22458792911944e-05	0.000815945684998507	0.108	0.1209	down
OsTN1g000210	602	530	277	179	323	193	493	199	0.403	-1.31	0.00737824842442853	0.0476559331199655	0.1637	0.1477	down
OsTN1g000238	45	14	19	61	115	101	27	78	2.879	1.525	0.00225130309180681	0.0192095787646002	0.1511	0.1825	up
OsTN1g000240	10	8	1	20	32	37	7	25	3.763	1.912	0.0069456718016479	0.0456168664904141	0.2672	0.2175	up
OsTN1g000244	99	99	131	14	40	41	118	26	0.223	-2.167	6.78784091998839e-09	4.59903330320108e-07	0.0768	0.1399	down
OsTN1g000246	82	106	44	11	6	11	82	8	0.104	-3.267	7.53517263050591e-07	2.703864737312e-05	0.2296	0.1922	down
OsTN1g000247	0	0	0	3	4	7	0	4	32.673	5.03	0.00168263008125484	0.0153742077264849	0.5243	0.4085	up
OsTN1g000279	13	14	11	1	4	1	14	2	0.132	-2.923	0.00174983834958988	0.0158584708887831	0.3905	0.5813	down
OsTN1g000283	50	52	53	0	0	2	55	1	0.012	-6.333	1.82156800275556e-14	4.44022903844105e-12	0.1884	0.2093	down
OsTN1g000287	68	9	13	0	1	0	30	0	0.013	-6.253	0.000115304245940306	0.00187089299438107	1.0135	0.2326	down
OsTN1g000296	6	1	0	8	67	60	2	35	13.996	3.807	8.75129037602877e-05	0.00148947524080612	0.4472	0.1953	up
OsTN1g000297	2	0	2	2	18	22	1	11	7.223	2.853	0.00416985415673235	0.030941251610155	0.4159	0.287	up
OsTN1g000359	48	31	0	0	1	0	27	0	0.015	-6.088	0.000548053545380299	0.0064355324124474	1.2598	0.7556	down
OsTN1g000364	139	118	256	475	618	760	186	533	2.866	1.519	0.00139588865664888	0.0133405185856479	0.1527	0.1503	up
OsTN1g000366	71	72	52	118	204	197	69	147	2.124	1.087	0.00499025832687666	0.0354081666547455	0.0957	0.1159	up
OsTN1g000372	5	5	8	27	28	63	6	33	5.118	2.356	0.00294251734256862	0.0235212835596882	0.3461	0.239	up
OsTN1g000378	1	0	0	18	75	39	0	35	74.981	6.228	3.79684938879125e-09	2.72948423688461e-07	0.3047	0.191	up
OsTN1g000382	8	8	88	8	12	4	39	7	0.183	-2.451	0.00704696417321018	0.0461677384063232	0.4863	0.1988	down
OsTN1g000401	3	2	11	0	0	0	6	0	0.021	-5.581	0.000422314348838437	0.00522521610024313	0.6759	1.1042	down
OsTN1g000402	5	6	17	0	0	0	11	0	0.012	-6.376	3.2001259545105e-05	0.000658209295325862	0.6144	1.0625	down
OsTN1g000406	90	137	171	24	72	54	145	41	0.286	-1.807	3.29301495037445e-05	0.000672136362392597	0.117	0.1506	down
OsTN1g000434	84	73	89	15	39	33	88	24	0.276	-1.858	1.84338701954019e-05	0.000418103834474746	0.1081	0.1564	down
OsTN1g000443	3	4	3	0	0	0	3	0	0.034	-4.883	0.00114265192562857	0.0114195190324246	0.4692	1.3596	down
OsTN1g000467	95	81	53	134	209	323	81	187	2.315	1.211	0.00121858556423764	0.0119863376905323	0.0902	0.1167	up
OsTN1g000473	73	90	98	43	61	26	94	39	0.409	-1.291	0.00296818846874369	0.0236818558527643	0.1161	0.1382	down
OsTN1g000479	0	0	0	0	17	14	0	8	64.248	6.006	0.000148075630670486	0.00228049375426942	0.5765	0.207	up
OsTN1g000481	1	2	6	17	9	32	3	17	5.042	2.334	0.00415773323595661	0.0308945510633959	0.3105	0.3167	up
OsTN1g000482	19	8	15	109	56	46	15	69	4.578	2.195	0.00153057550659943	0.014343311872936	0.2861	0.2019	up
OsTN1g000484	5	1	8	141	67	23	5	78	15.162	3.922	1.69123439307382e-05	0.000388160257293468	0.4231	0.1991	up
OsTN1g000485	79	61	57	19	29	19	70	20	0.28	-1.839	0.000543105527206372	0.00639868828636974	0.167	0.1991	down
OsTN1g000486	131	103	91	170	312	381	115	240	2.099	1.07	0.00109746740309792	0.0111040034434625	0.0698	0.1183	up
OsTN1g000495	91	94	85	17	41	58	96	31	0.332	-1.589	0.000167092402511365	0.00250780508142853	0.1066	0.1515	down
OsTN1g000514	5	3	1	10	80	68	3	41	12.624	3.658	1.23824090204734e-05	0.000298741465412036	0.3285	0.2029	up
OsTN1g000520	27	23	14	47	82	122	22	70	3.093	1.629	6.65736754727533e-05	0.00119141597953644	0.09	0.1928	up
OsTN1g000525	44	21	19	90	101	134	29	94	3.213	1.684	0.000127268526299685	0.0020369687828207	0.1134	0.178	up
OsTN1g000533	67	42	61	159	115	199	60	142	2.345	1.23	0.0072382534873084	0.0471436750835877	0.1359	0.1445	up
OsTN1g000554	13	9	15	150	182	193	13	153	11.494	3.523	1.79774444972131e-06	5.8205750450748e-05	0.2991	0.1823	up
OsTN1g000575	5	4	1	4	149	33	3	46	12.933	3.693	0.00100865630572417	0.0104357497946664	0.6661	0.1497	up
OsTN1g000576	155	203	167	43	103	114	188	71	0.381	-1.39	0.000254877765390087	0.00350077251983651	0.0926	0.115	down
OsTN1g000590	255	586	601	5943	3097	3604	526	4031	7.663	2.938	2.95351454645571e-06	8.69933097037307e-05	0.2452	0.1786	up
OsTN1g000591	140	186	136	1363	1179	1347	165	1171	7.095	2.827	2.31313081319801e-08	1.35136543128072e-06	0.1585	0.1759	up
OsTN1g000598	4	0	4	8	26	30	3	17	5.918	2.565	0.000768467221027526	0.00839612795277216	0.2468	0.2471	up
OsTN1g000599	0	0	0	0	10	1	0	3	23.859	4.576	0.0048633684875404	0.034784976565015	0.5332	0.2056	up
OsTN1g000602	369	242	262	659	824	607	307	617	2.005	1.004	0.00636990924911112	0.0427083988131203	0.0933	0.1638	up
OsTN1g000613	3248	3163	3264	127	282	420	3448	226	0.066	-3.928	1.92536335312812e-19	1.36103935432627e-16	0.107	0.1679	down
OsTN1g000614	34	33	39	2	0	4	38	2	0.049	-4.351	8.0168218924262e-09	5.3801500592621e-07	0.2145	0.2133	down
OsTN1g000631	5	0	3	0	0	0	3	0	0.043	-4.539	0.00614709600060574	0.0415609913656031	0.8012	1.5419	down
OsTN1g000633	0	0	0	14	15	4	0	10	82.219	6.361	0.000611218051170854	0.00700654119523259	1.0538	1.1566	up
OsTN1g000645	100	34	14	7	9	2	50	6	0.109	-3.192	0.000284218436067973	0.00382194398387854	0.4201	0.2275	down
OsTN1g000662	49	4	12	3	3	0	22	2	0.088	-3.513	0.000514925039312267	0.0061279547186842	0.483	0.2144	down
OsTN1g000663	91	117	84	276	340	251	104	256	2.458	1.297	0.00225170410909697	0.0192095787646002	0.1197	0.1263	up
OsTN1g000664	44	44	44	128	296	236	47	183	3.89	1.96	1.33871811998519e-06	4.51940621687575e-05	0.0996	0.1197	up
OsTN1g000665	23	24	33	114	89	114	29	96	3.319	1.731	0.000817872025524259	0.0087954422136374	0.1631	0.1464	up
OsTN1g000666	19	12	11	43	110	132	15	77	5.233	2.388	1.01947415038828e-06	3.54426037824333e-05	0.1267	0.1889	up
OsTN1g000667	408	271	322	943	1197	2024	353	1181	3.341	1.74	4.2182443662945e-05	0.000815463156572538	0.1214	0.1893	up
OsTN1g000680	424	317	482	0	31	20	437	13	0.03	-5.062	1.50079923290163e-08	9.25216550353047e-07	0.3977	0.1583	down
OsTN1g000685	333	234	192	617	818	708	266	625	2.345	1.23	0.00237049208375917	0.0199665599114986	0.1121	0.1498	up
OsTN1g000693	187	396	295	690	909	1378	317	846	2.665	1.414	0.00203133841055151	0.017742419140266	0.1437	0.1882	up
OsTN1g000696	9	5	2	39	27	49	5	34	6.047	2.596	0.000102877510344738	0.00169651894391979	0.2184	0.2214	up
OsTN1g000708	77	62	60	15	29	5	70	14	0.203	-2.303	1.18659406241567e-05	0.000287261418740287	0.1531	0.1912	down
OsTN1g000714	0	1	1	4	22	16	1	11	13.454	3.75	0.000272970208227043	0.00371173152598754	0.343	0.1967	up
OsTN1g000716	0	2	1	93	89	271	1	128	106.613	6.736	1.673321293509e-16	6.81569511609084e-14	0.2066	0.1456	up
OsTN1g000725	14	25	22	51	149	99	22	82	3.728	1.898	1.85810002432335e-05	0.000420990675382749	0.1093	0.1881	up
OsTN1g000739	38	20	13	75	161	155	25	108	4.391	2.135	4.11871059479687e-05	0.000800600326158178	0.1611	0.1714	up
OsTN1g000740	51	39	33	171	191	151	43	153	3.513	1.813	8.89369444425595e-05	0.00151007668598348	0.1328	0.1253	up
OsTN1g000741	5	2	0	13	24	9	2	13	5.267	2.397	0.00654669810313125	0.043481311203603	0.3545	0.5106	up
OsTN1g000762	257	180	248	7	23	64	243	25	0.104	-3.268	1.03100510815181e-10	1.23528391686867e-08	0.144	0.1169	down
OsTN1g000789	72	262	140	1746	1457	1334	172	1387	8.049	3.009	0.000142337882207273	0.00221464377694031	0.3849	0.1892	up
OsTN1g000790	24	70	34	111	227	206	46	152	3.287	1.717	8.90255292235879e-05	0.0015103715185957	0.1189	0.1295	up
OsTN1g000791	16	6	5	60	33	35	9	41	4.254	2.089	0.000527430651943483	0.00624828409147241	0.1921	0.2048	up
OsTN1g000796	1	3	2	17	35	34	2	24	10.629	3.41	8.96795995083395e-06	0.000225603234492688	0.2273	0.2021	up
OsTN1g000797	6	39	28	119	77	177	27	111	4.131	2.047	0.00079733991321323	0.00862713649975151	0.23	0.1732	up
OsTN1g000800	49	84	59	1	13	6	69	5	0.078	-3.677	3.2030555607879e-05	0.000658209295325862	0.4164	0.193	down
OsTN1g000801	86	76	95	157	357	380	92	246	2.685	1.425	8.26372687349313e-05	0.00142478744557861	0.0842	0.1228	up
OsTN1g000809	460	256	210	9	41	20	322	19	0.06	-4.069	2.86550580390345e-19	1.96028327688324e-16	0.1043	0.1167	down
OsTN1g000810	12	13	7	0	0	0	11	0	0.011	-6.514	4.61248980183796e-07	1.76884396433233e-05	0.309	0.7223	down
OsTN1g000817	47	72	52	179	197	153	61	158	2.57	1.362	0.000283182658267996	0.00381298706913612	0.0876	0.1337	up
OsTN1g000818	202	344	210	109	113	123	271	102	0.376	-1.411	0.000231961551993206	0.0032299465746027	0.0962	0.1156	down
OsTN1g000830	17	20	54	5	4	12	33	6	0.183	-2.45	0.00245761720708957	0.0204547441564947	0.3661	0.229	down
OsTN1g000832	537	378	437	54	73	54	478	53	0.111	-3.176	3.08976643170304e-11	4.14713143779281e-09	0.1336	0.1242	down
OsTN1g000834	0	1	4	35	66	24	2	36	18.604	4.218	1.54031604497801e-06	5.08016833061409e-05	0.3118	0.195	up
OsTN1g000866	32	22	12	97	133	111	23	99	4.283	2.099	5.03483390047827e-05	0.0009465755543213	0.1578	0.1869	up
OsTN1g000871	59	36	18	103	137	118	39	104	2.649	1.405	0.000801760812549506	0.00866612719252669	0.1067	0.1678	up
OsTN1g000882	50	44	28	13	25	23	43	17	0.402	-1.314	0.00276443120500039	0.0223504737188118	0.1015	0.1995	down
OsTN1g000883	4	6	12	0	3	1	8	1	0.15	-2.741	0.00484531269352599	0.0346792258830933	0.3651	0.8256	down
OsTN1g000925	5	9	3	18	34	20	6	20	3.348	1.743	0.00291318078111177	0.0233572116540784	0.1493	0.2716	up
OsTN1g000937	79	81	57	26	20	41	77	26	0.333	-1.588	0.00185189692646607	0.0165481535439063	0.1583	0.1637	down
OsTN1g000939	528	430	266	88	108	165	428	103	0.241	-2.053	0.000336612707164262	0.00437143030057104	0.2144	0.1519	down
OsTN1g000946	20	31	11	542	643	746	22	562	25.426	4.668	4.00320787256161e-19	2.57260695010346e-16	0.1345	0.1367	up
OsTN1g000977	1751	2122	1957	422	1548	1461	2086	916	0.439	-1.186	0.00627084496336607	0.0421641753766976	0.1314	0.1792	down
OsTN1g000981	32	22	0	0	2	2	18	1	0.065	-3.951	0.00181488931455598	0.0163017186335403	0.774	0.3592	down
OsTN1g000992	21	10	12	4	3	2	15	3	0.183	-2.452	0.000571950242934744	0.00665716180127174	0.1987	0.4478	down
OsTN1g000999	24	58	52	267	246	374	49	261	5.355	2.421	6.14488002074416e-08	3.19398212254709e-06	0.1206	0.1177	up
OsTN1g001008	137	291	44	516	582	824	167	556	3.328	1.735	0.00339271322175689	0.0263743655769056	0.2356	0.1606	up
OsTN1g001017	36	56	31	16	13	14	44	13	0.294	-1.766	0.00118644884968146	0.0117300796061514	0.1635	0.2013	down
OsTN1g001021	22	7	4	0	2	1	11	1	0.083	-3.593	0.0011380528208286	0.0113919919716508	0.5065	0.8561	down
OsTN1g001035	163	161	106	41	70	50	152	46	0.304	-1.719	0.000202492487320642	0.00292126406708085	0.1352	0.1166	down
OsTN1g001036	224	132	194	387	620	475	194	426	2.186	1.128	0.00106469688549743	0.0108709806695926	0.0801	0.142	up
OsTN1g001048	32	41	25	115	117	85	35	96	2.736	1.452	0.00641440918476199	0.0428930019616339	0.1793	0.1639	up
OsTN1g001080	14	4	3	157	117	101	7	116	15.746	3.977	1.49517824552351e-10	1.69562807769076e-08	0.1839	0.1882	up
OsTN1g001083	483	401	386	120	127	82	450	100	0.22	-2.183	3.11963975546122e-08	1.74559895235003e-06	0.0983	0.1312	down
OsTN1g001085	4	2	0	8	22	18	2	13	6.054	2.598	0.0053720009746183	0.0375491182164569	0.3982	0.3406	up
OsTN1g001118	1	0	0	4	32	6	0	11	23.733	4.569	0.005994234674329	0.0407043659105011	1.1815	0.1419	up
OsTN1g001137	352	281	256	731	1011	996	314	790	2.516	1.331	0.000352923827655082	0.00453603370489778	0.0947	0.1814	up
OsTN1g001142	242	207	350	65	10	6	287	30	0.102	-3.292	7.57389595895212e-05	0.0013263386589719	0.4062	0.1151	down
OsTN1g001159	5	2	1	34	23	93	3	43	14.773	3.885	8.51683191467631e-06	0.000216566492103766	0.351	0.2134	up
OsTN1g001191	5	1	15	26	36	47	8	31	4.045	2.016	0.000228451842574692	0.00319155350822233	0.1373	0.2039	up
OsTN1g001203	17	14	19	28	144	99	18	71	4.005	2.002	0.000585470072748834	0.00678473433485493	0.2001	0.174	up
OsTN1g001206	18	27	13	444	857	1274	21	709	34.233	5.097	1.4687534262768e-21	1.48323113862153e-18	0.1356	0.1555	up
OsTN1g001220	146	128	122	74	97	51	140	66	0.467	-1.097	0.00341561298110822	0.0264941128348069	0.089	0.1242	down
OsTN1g001248	13	3	9	17	43	142	9	53	6.047	2.596	0.00130461139811902	0.0126390561534536	0.3753	0.2034	up
OsTN1g001249	0	0	0	3	0	7	0	3	24.44	4.611	0.00569915984563856	0.0392886794497544	0.6111	1.2749	up
OsTN1g001260	140	127	132	10	19	17	142	13	0.092	-3.435	6.28955701018219e-18	3.25323501255936e-15	0.0742	0.1311	down
OsTN1g001264	2	2	4	30	21	28	3	24	8.042	3.008	0.00473363408544406	0.0340407521363215	0.5957	0.2441	up
OsTN1g001266	15	12	7	33	62	98	12	53	4.431	2.148	0.00274067399927087	0.0222091988928305	0.3038	0.2018	up
OsTN1g001271	140	133	126	52	115	68	142	66	0.467	-1.1	0.00298156233801231	0.0237706738730177	0.0871	0.1173	down
OsTN1g001276	38	18	25	10	9	2	29	7	0.227	-2.136	0.00100959104025621	0.0104390039935219	0.2142	0.2342	down
OsTN1g001302	142	167	141	38	52	86	161	50	0.31	-1.688	1.98130266596119e-06	6.29004276003578e-05	0.0759	0.1152	down
OsTN1g001309	28	15	16	8	9	1	20	6	0.262	-1.93	0.0010216322171864	0.0105173565193553	0.1493	0.2258	down
OsTN1g001314	186	255	186	462	783	845	224	589	2.63	1.395	0.000788954204919957	0.00856874983027798	0.1172	0.1768	up
OsTN1g001328	0	0	0	2	4	9	0	4	34.002	5.088	0.00152923456136432	0.0143370810534275	0.5417	1.0043	up
OsTN1g001332	1	0	0	0	78	0	0	19	41.202	5.365	0.00267733474169238	0.0218168674507696	1.3511	0.2735	up
OsTN1g001337	13	6	1	16	49	86	7	40	5.795	2.535	0.000367519979952613	0.00468140377251304	0.2713	0.2036	up
OsTN1g001354	276	215	104	96	66	121	207	85	0.409	-1.29	0.00733909953423661	0.0475409620025829	0.1544	0.1152	down
OsTN1g001358	947	710	734	243	471	460	845	328	0.389	-1.362	0.000171977476022631	0.00256659136805907	0.0897	0.186	down
OsTN1g001368	353	450	236	803	1578	1818	368	1166	3.168	1.663	8.22963422556136e-05	0.0014200638976524	0.1205	0.1884	up
OsTN1g001381	22	3	0	77	345	264	8	182	21.586	4.432	4.17941655751245e-06	0.000117394552232009	0.4786	0.1207	up
OsTN1g001388	4	4	4	172	141	132	4	136	30.986	4.954	6.47197482150384e-10	5.86543461707829e-08	0.2877	0.1924	up
OsTN1g001391	20	16	19	2	1	0	19	1	0.051	-4.282	4.5188052559942e-07	1.74536560884629e-05	0.2244	0.2716	down
OsTN1g001418	20	6	10	81	43	50	12	55	4.362	2.125	0.0031878600195273	0.0250946352762121	0.3084	0.2086	up
OsTN1g001422	14698	11817	18458	1582	744	1067	16107	1081	0.067	-3.899	5.60193326743832e-16	1.94754424266499e-13	0.132	0.1171	down
OsTN1g001440	2	2	10	36	15	60	5	33	6.348	2.666	0.000320263421473196	0.0041873158934538	0.2755	0.2359	up
OsTN1g001444	48	25	73	2	0	1	52	1	0.02	-5.672	2.15277212057526e-08	1.2739132655737e-06	0.378	0.2068	down
OsTN1g001452	196	1051	749	231	48	151	733	142	0.193	-2.372	0.00496918759482486	0.035368172502607	0.4618	0.1678	down
OsTN1g001453	237	481	390	76	50	130	401	76	0.188	-2.412	1.87185113816923e-07	8.30467512283574e-06	0.1339	0.1317	down
OsTN1g001458	57	53	64	10	8	12	62	9	0.143	-2.803	1.48843730792508e-06	4.96162110550781e-05	0.1759	0.2052	down
OsTN1g001464	1	0	0	0	75	7	0	20	43.356	5.438	0.000959844594522469	0.0100223654928794	1.0914	0.1764	up
OsTN1g001477	39	51	27	117	171	235	42	148	3.559	1.831	2.63979721513662e-05	0.000555378765291689	0.1159	0.1368	up
OsTN1g001487	8	4	10	26	45	45	8	33	4.13	2.046	0.0016861589807199	0.0153998163239134	0.2243	0.2106	up
OsTN1g001511	5	7	7	27	60	82	7	46	6.737	2.752	1.03469966607617e-06	3.59130537127287e-05	0.1466	0.2023	up
OsTN1g001512	0	0	0	0	8	4	0	3	25.743	4.686	0.00689403759876977	0.0453479700239176	0.7972	1.0965	up
OsTN1g001514	28	40	29	14	5	7	35	9	0.237	-2.08	0.000735377872065139	0.00809297277264421	0.1979	0.2033	down
OsTN1g001515	55	126	66	25	8	2	89	13	0.135	-2.886	0.00030197331810668	0.00399747075973057	0.3687	0.1493	down
OsTN1g001518	590	673	345	1361	2116	2278	567	1635	2.882	1.527	0.000124632114927148	0.00200232822822729	0.1082	0.1875	up
OsTN1g001545	14	5	5	34	45	79	8	44	5.302	2.407	0.00237043112632557	0.0199665599114986	0.3601	0.2007	up
OsTN1g001548	64	99	127	3	13	26	105	11	0.108	-3.208	2.01262244330814e-07	8.85324078817905e-06	0.2079	0.1618	down
OsTN1g001567	12	14	0	0	0	0	9	0	0.014	-6.186	0.00437202091072398	0.0320599749148421	1.9986	1.9441	down
OsTN1g001570	30	12	12	2	0	1	19	1	0.055	-4.193	1.81105541580165e-05	0.000412092834795125	0.3539	0.4825	down
OsTN1g001589	0	0	3	5	8	14	1	8	6.369	2.671	0.00341526376176336	0.0264941128348069	0.2451	0.4749	up
OsTN1g001617	174	303	309	117	139	207	285	133	0.467	-1.098	0.0027295050266196	0.0221440754015003	0.0897	0.131	down
OsTN1g001622	55	39	50	71	236	220	51	142	2.781	1.476	0.000219621989279175	0.00310501568442898	0.0988	0.1206	up
OsTN1g001670	381	318	191	813	1050	1075	312	852	2.731	1.45	7.20884369023899e-05	0.00127186312927536	0.0904	0.1745	up
OsTN1g001675	229	164	88	1266	457	2185	167	1170	6.991	2.805	2.41233884623882e-05	0.000519375329057733	0.2756	0.181	up
OsTN1g001683	62	52	31	114	173	136	51	122	2.392	1.258	0.0020171434208459	0.0176547917977214	0.1036	0.1569	up
OsTN1g001691	68	14	21	2	0	8	35	3	0.084	-3.57	0.00047222481289443	0.00570625162794996	0.5387	0.2986	down
OsTN1g001707	0	0	0	4	2	9	0	4	35.717	5.159	0.00145865794609158	0.0138344181854938	0.5719	0.516	up
OsTN1g001712	58	39	55	156	160	229	54	159	2.944	1.558	0.00108940468171471	0.0110487829197149	0.1458	0.1359	up
OsTN1g001723	8	19	10	0	0	0	13	0	0.009	-6.744	4.75926939082753e-09	3.35315036449434e-07	0.1875	0.2736	down
OsTN1g001745	78	141	58	20	9	15	99	14	0.137	-2.864	3.08436371500703e-08	1.73042596042736e-06	0.1421	0.1735	down
OsTN1g001749	24	30	21	91	143	174	27	115	4.307	2.107	1.57098626233962e-06	5.16162898439943e-05	0.11	0.1681	up
OsTN1g001776	0	0	0	0	62	18	0	20	159.755	7.32	3.99849169107424e-05	0.000783696980523212	0.8969	0.2039	up
OsTN1g001793	8	39	71	3	17	1	44	6	0.132	-2.919	0.000721234213170577	0.00797456410777291	0.4159	0.2023	down
OsTN1g001837	356	432	290	697	1246	1528	383	969	2.53	1.339	0.000470133449085153	0.00570046887063971	0.1004	0.1854	up
OsTN1g001864	0	7	9	17	35	36	6	24	4.108	2.038	0.00492278353859713	0.0351033861812472	0.2722	0.2044	up
OsTN1g001867	0	0	0	3	0	7	0	3	24.485	4.614	0.00751770456530191	0.0482822412829672	0.7505	1.3536	up
OsTN1g001942	6	0	2	6	36	90	3	34	11.921	3.575	2.61339991815049e-05	0.00055091821137393	0.3338	0.2498	up
OsTN1g001989	1	0	0	1	59	83	0	36	76.623	6.26	2.58797434772634e-07	1.0911167394082e-05	0.4611	0.2032	up
OsTN1g001990	6	10	8	23	164	477	9	170	19.539	4.288	1.92645555897636e-05	0.000434149039902824	0.5276	0.1513	up
OsTN1g002011	10	7	7	14	35	33	9	23	2.655	1.409	0.00545496342305924	0.0380037481316745	0.1108	0.2666	up
OsTN1g002052	1265	1328	1367	231	270	273	1414	227	0.16	-2.641	8.97113946367474e-09	5.92682101576792e-07	0.133	0.189	down
OsTN1g002053	9	9	7	53	45	43	9	43	4.767	2.253	0.00122673543088818	0.0120441566124285	0.2702	0.2064	up
OsTN1g002063	0	0	0	0	16	26	0	11	86.679	6.438	5.44888676862458e-05	0.00101274795532184	0.6125	0.322	up
OsTN1g002072	14	7	28	90	65	151	18	90	5.048	2.336	0.000385168219412393	0.00485051213128184	0.258	0.2023	up
OsTN1g002085	3	24	2	81	165	510	10	202	19.105	4.256	0.00157287294552915	0.014661941343225	0.9806	0.1417	up
OsTN1g002101	517	178	0	0	39	0	231	9	0.042	-4.569	0.00285090994351311	0.022953396800335	1.2455	0.1631	down
OsTN1g002123	367	455	523	2745	1807	1686	484	1959	4.044	2.016	0.00124347304253633	0.0121578297893352	0.2596	0.1893	up
OsTN1g002124	161	94	193	300	474	550	160	374	2.341	1.227	0.00367599443204534	0.0281227405343674	0.1209	0.1237	up
OsTN1g002125	168	174	240	1229	844	850	209	910	4.342	2.118	0.00155670687494221	0.0145432082365196	0.2953	0.1702	up
OsTN1g002136	14	29	25	127	109	176	25	122	4.93	2.302	4.85717052871104e-05	0.000917239674108415	0.1919	0.1523	up
OsTN1g002158	1166	1102	1029	55	107	116	1171	78	0.066	-3.914	1.58312285934091e-13	3.13769032505072e-11	0.1573	0.1837	down
OsTN1g002163	1240	1420	1140	396	709	745	1353	520	0.384	-1.381	0.000684749221898727	0.00761482787037562	0.1138	0.1877	down
OsTN1g002164	318	289	179	69	175	70	276	88	0.319	-1.65	0.000153970484228936	0.00235147281926032	0.1244	0.115	down
OsTN1g002169	5	1	4	29	27	53	4	32	8.679	3.117	0.000175881729594916	0.00261565486642313	0.3363	0.188	up
OsTN1g002190	131	79	166	26	42	54	134	34	0.256	-1.964	5.07684601167381e-05	0.000952784720084659	0.1447	0.1449	down
OsTN1g002216	6	6	1	1	45	50	5	24	5.254	2.393	0.00616315170392503	0.0416115753534346	0.4147	0.2036	up
OsTN1g002220	37	40	75	8	13	23	55	12	0.225	-2.155	0.000811572034317771	0.00874543096126878	0.2418	0.2026	down
OsTN1g002238	50	33	67	99	224	236	54	154	2.866	1.519	0.00137395823639464	0.0131724829652898	0.1446	0.12	up
OsTN1g002250	240	316	186	581	761	1110	264	698	2.649	1.405	0.00188137266809713	0.0167148178350799	0.1395	0.1691	up
OsTN1g002267	0	0	0	0	27	4	0	8	62.488	5.966	0.00388780831087382	0.0292961168851826	1.5621	1.024	up
OsTN1g002271	49	38	16	1	17	2	36	5	0.149	-2.747	0.00264740092990052	0.0216602745063273	0.4761	0.2261	down
OsTN1g002280	67	39	27	17	22	31	46	20	0.433	-1.208	0.00682910866919703	0.0450326205061136	0.11	0.2048	down
OsTN1g002292	45	33	64	434	475	632	51	449	8.796	3.137	3.81294842602824e-16	1.34768662117968e-13	0.0837	0.1183	up
OsTN1g002302	4	2	0	13	18	25	2	16	7.239	2.856	0.000250319370631573	0.00345175897325016	0.2309	0.3812	up
OsTN1g002309	377	318	213	1060	1293	1451	319	1105	3.464	1.792	2.93140251725817e-05	0.000608876133041078	0.1232	0.1729	up
OsTN1g002328	25	32	18	2	3	2	27	2	0.08	-3.649	6.85546306221586e-06	0.000178823868585992	0.2783	0.2898	down
OsTN1g002333	0	0	2	5	15	14	1	9	11.079	3.47	0.00228996650248149	0.0194798714874147	0.4743	0.5825	up
OsTN1g002347	0	0	0	0	6	8	0	3	30.287	4.921	0.00225545327699933	0.0192171143613198	0.5421	0.284	up
OsTN1g002362	74	44	82	129	269	336	71	203	2.838	1.505	0.00784764039031574	0.0499277149423931	0.2131	0.1185	up
OsTN1g002365	100	76	91	253	474	643	95	379	4.004	2.001	0.000131253042604256	0.00208033129634413	0.1782	0.1365	up
OsTN1g002386	62	155	209	0	0	0	157	0	0.001	-10.289	1.33774752119318e-25	2.83696116819437e-22	0.1681	0.1241	down
OsTN1g002403	376	123	120	5	39	20	212	16	0.08	-3.638	1.713555845554e-08	1.04724434630154e-06	0.2299	0.1373	down
OsTN1g002443	311	107	70	2	30	18	166	13	0.079	-3.671	3.43623518632791e-05	0.000694180584625201	0.442	0.1561	down
OsTN1g002451	3	3	0	10	11	36	2	16	7.194	2.847	0.000710514593463672	0.00787657239079147	0.2941	0.2275	up
OsTN1g002462	161	141	136	51	29	60	155	43	0.271	-1.883	1.89610490789167e-06	6.06062663488002e-05	0.0937	0.1212	down
OsTN1g002463	165	175	158	6	29	25	177	16	0.092	-3.439	5.09692297002079e-13	9.65093262725275e-11	0.1193	0.1194	down
OsTN1g002482	42	41	58	141	256	388	51	217	4.289	2.1	2.36918056415529e-06	7.31342244891431e-05	0.1221	0.1204	up
OsTN1g002488	247	377	446	52	137	184	388	101	0.262	-1.934	1.50508727939884e-06	5.0028818078701e-05	0.1043	0.1341	down
OsTN1g002492	263	272	220	81	178	165	268	117	0.44	-1.185	0.000620133007901496	0.00707812739427719	0.079	0.1217	down
OsTN1g002507	3	2	4	29	121	123	3	72	21.899	4.453	2.4581227608726e-12	4.04103948758336e-10	0.1558	0.1574	up
OsTN1g002519	34	25	37	11	8	12	34	9	0.27	-1.891	0.000390653975592216	0.00490212950318587	0.1413	0.213	down
OsTN1g002520	41	77	31	5	1	0	53	2	0.037	-4.738	1.77010161816094e-09	1.40593801559322e-07	0.2403	0.206	down
OsTN1g002523	107	82	69	29	46	62	91	39	0.426	-1.232	0.00724038995365894	0.0471436750835877	0.1322	0.1631	down
OsTN1g002527	42	40	37	64	238	247	43	146	3.473	1.796	1.23196519877488e-06	4.19362535640752e-05	0.0806	0.1152	up
OsTN1g002536	36	24	10	52	85	188	24	89	3.668	1.875	0.00106675984687593	0.0108815661725338	0.2014	0.1929	up
OsTN1g002563	42	15	7	7	2	2	22	4	0.165	-2.597	0.00248958863954572	0.0206802609787881	0.3743	0.2624	down
OsTN1g002577	33	31	39	17	20	12	37	15	0.393	-1.346	0.00525907511073908	0.0368813511486255	0.1221	0.2061	down
OsTN1g002581	21	10	12	0	0	0	15	0	0.008	-6.921	2.73058463639524e-06	8.16749060423609e-05	0.5442	0.9261	down
OsTN1g002583	43	25	25	130	169	255	32	158	4.818	2.268	8.79023708951369e-08	4.38622489311334e-06	0.1042	0.1481	up
OsTN1g002606	0	0	2	5	16	15	1	10	11.689	3.547	0.0015154021362021	0.0142388715562419	0.4495	0.225	up
OsTN1g002611	0	1	0	0	8	62	0	18	37.261	5.22	0.000634945065274997	0.0071929914526105	0.9052	0.2788	up
OsTN1g002616	330	382	438	136	225	137	413	144	0.348	-1.524	0.000541883760741899	0.00638784264260892	0.1301	0.1516	down
OsTN1g002619	55	57	38	158	322	348	53	230	4.328	2.114	6.36399893079575e-10	5.80862236682671e-08	0.0686	0.1164	up
OsTN1g002624	276	298	345	74	191	121	330	107	0.325	-1.623	9.27988397161811e-05	0.00156686703332886	0.1134	0.1159	down
OsTN1g002640	4	14	2	0	1	0	7	0	0.055	-4.182	0.00191069673588537	0.0169398602332446	0.6496	1.21	down
OsTN1g002644	0	0	0	0	8	31	0	10	80.533	6.332	0.000969359647394166	0.0101117609652179	1.1878	0.803	up
OsTN1g002648	15	10	0	35	224	163	8	110	12.699	3.667	2.47659583672065e-05	0.000528924735166795	0.4103	0.1199	up
OsTN1g002649	2	7	0	4	35	71	3	28	8.608	3.106	0.00040888695461565	0.00509865068982721	0.38	0.1968	up
OsTN1g002653	4	1	1	26	45	106	2	48	21.843	4.449	3.45870715002185e-10	3.50951208279968e-08	0.1823	0.1945	up
OsTN1g002680	16	24	25	8	1	1	23	4	0.143	-2.805	0.000356663390137908	0.00457024804510853	0.2869	0.3529	down
OsTN1g002681	289	187	166	457	750	670	225	535	2.377	1.249	0.0016081143268014	0.0148792672462815	0.1068	0.1422	up
OsTN1g002691	0	0	0	1	6	37	0	11	91.951	6.523	0.00063422743398323	0.00718997817316027	1.1557	0.8143	up
OsTN1g002700	58	52	47	2	4	1	56	2	0.038	-4.717	5.33101234302991e-14	1.16551318307871e-11	0.1335	0.1985	down
OsTN1g002714	1	1	0	1	36	31	1	17	21.025	4.394	0.000364152137935252	0.0046493524317838	0.6082	0.2013	up
OsTN1g002721	0	0	0	2	26	0	0	7	58.873	5.88	0.000846597277228519	0.00901314740144329	0.8844	0.3783	up
OsTN1g002732	66	76	43	20	35	29	65	24	0.366	-1.451	0.000669511311647903	0.00748067775875504	0.1032	0.2011	down
OsTN1g002741	6	6	8	110	156	205	7	134	18.459	4.206	3.4680341634767e-15	9.93872979795276e-13	0.1251	0.1688	up
OsTN1g002742	26	28	9	324	232	385	22	283	12.727	3.67	1.3085200019526e-12	2.25607997409828e-10	0.1428	0.1175	up
OsTN1g002752	186	156	74	59	40	53	145	46	0.319	-1.651	0.000303808454957501	0.00401424666933565	0.1314	0.151	down
OsTN1g002753	595	430	219	191	204	243	432	187	0.433	-1.208	0.00260915455471773	0.0214300312323388	0.1095	0.1324	down
OsTN1g002755	582	255	139	107	83	68	333	80	0.239	-2.068	3.4928185389529e-05	0.000703439722275158	0.1605	0.1159	down
OsTN1g002762	64	14	17	0	3	10	32	3	0.109	-3.191	0.00182093235817243	0.0163490738864364	0.5732	0.2179	down
OsTN1g002765	67	14	54	1	2	0	47	1	0.021	-5.595	1.65128459168279e-10	1.85284615533423e-08	0.256	0.2049	down
OsTN1g002766	18	12	6	3	2	1	12	2	0.153	-2.708	0.00587234231542635	0.0401466033150376	0.4522	0.4688	down
OsTN1g002775	83	63	58	159	259	224	72	183	2.543	1.346	5.3682758737219e-05	0.00100127551850502	0.0687	0.1206	up
OsTN1g002783	258	320	282	188	141	155	308	148	0.48	-1.058	0.00365260654292191	0.0280147656259476	0.0889	0.1375	down
OsTN1g002790	362	419	295	84	71	109	382	78	0.204	-2.291	3.94678768722302e-09	2.81816587484641e-07	0.0939	0.1445	down
OsTN1g002794	66	46	44	63	182	199	55	120	2.191	1.131	0.00503178582655125	0.0356354827481858	0.1026	0.1465	up
OsTN1g002812	7	6	4	15	28	42	6	23	3.873	1.953	0.00459243233545853	0.0333533262116675	0.2418	0.2323	up
OsTN1g002825	70	77	101	9	14	50	89	20	0.224	-2.156	0.000293794313215097	0.00392843379593477	0.2149	0.1388	down
OsTN1g002833	284	163	214	266	936	1365	233	681	2.926	1.549	0.000646602532444458	0.00729388292848384	0.1396	0.1795	up
OsTN1g002845	0	3	6	0	0	0	3	0	0.037	-4.774	0.000919682911422032	0.00967446205482492	0.3313	0.27	down
OsTN1g002856	266	208	300	1347	1298	1713	276	1287	4.655	2.219	1.41148541736833e-06	4.74379892965613e-05	0.1378	0.1885	up
OsTN1g002857	10	1	0	28	22	23	4	22	5.81	2.538	0.0034573905710301	0.0267568362259915	0.3889	0.3059	up
OsTN1g002866	169	180	245	24	26	24	214	22	0.102	-3.294	7.97908997694123e-14	1.69212561140993e-11	0.1038	0.116	down
OsTN1g002921	34	15	29	3	4	2	27	3	0.098	-3.349	1.25127664368503e-07	5.88377467464047e-06	0.1467	0.2067	down
OsTN1g002932	49	57	20	167	170	199	44	158	3.567	1.835	0.0017520724719696	0.0158719354605123	0.221	0.1397	up
OsTN1g002933	0	1	1	17	10	17	1	13	15.973	3.998	0.00019893011000409	0.00288557513191296	0.3978	0.9242	up
OsTN1g002935	129	149	258	27	36	29	195	27	0.138	-2.856	2.5393280349788e-06	7.77078349751737e-05	0.2186	0.1163	down
OsTN1g002953	250	270	138	606	909	818	232	670	2.89	1.531	9.61219585749668e-05	0.00160136654602184	0.1037	0.1746	up
OsTN1g002954	4	1	0	103	135	161	2	115	61.853	5.951	8.07936158815826e-12	1.21517036312108e-09	0.2834	0.2017	up
OsTN1g002959	9	4	16	0	2	2	10	1	0.114	-3.134	0.00555306720498064	0.0384975142909527	0.5904	0.6909	down
OsTN1g002972	167	189	69	404	498	550	149	422	2.825	1.498	0.00100256479251976	0.010391686977012	0.1393	0.1251	up
OsTN1g002992	20	25	7	148	157	111	18	125	6.782	2.762	1.18984792681756e-08	7.60033282651204e-07	0.1272	0.1792	up
OsTN1g002995	34	11	28	314	285	324	26	276	10.695	3.419	8.57647758620975e-11	1.03932205811857e-08	0.1532	0.1172	up
OsTN1g003013	711	446	588	1167	1661	2008	617	1379	2.236	1.161	0.00425404435046076	0.0313902291371682	0.1147	0.1876	up
OsTN1g003014	212	131	99	267	672	917	154	503	3.267	1.708	0.000206515430283049	0.00296317505413573	0.141	0.1484	up
OsTN1g003020	111	66	66	30	37	42	85	32	0.369	-1.437	3.2805313942577e-05	0.000670879742314591	0.0652	0.1592	down
OsTN1g003024	437	408	203	1219	1482	2464	367	1472	4.008	2.003	1.61173838903725e-05	0.000373553399085388	0.143	0.1891	up
OsTN1g003035	18	19	16	102	80	128	19	92	4.873	2.285	1.01725318106337e-05	0.000251506770247133	0.1519	0.1911	up
OsTN1g003054	0	50	0	0	0	1	18	0	0.022	-5.512	0.000487056503615266	0.00584550496444196	0.9976	0.215	down
OsTN1g003055	0	404	0	0	1	1	147	1	0.004	-7.801	3.82858511867009e-05	0.000752822152034774	1.3471	0.1246	down
OsTN1g003063	1	2	2	1	36	85	2	31	16.314	4.028	1.48154358155871e-05	0.000347941248439818	0.3679	0.2018	up
OsTN1g003082	104	41	63	171	371	380	72	255	3.508	1.811	3.65809933761267e-05	0.000728390098150052	0.1232	0.1153	up
OsTN1g003088	19	21	10	28	116	73	17	58	3.292	1.719	0.000747579045675071	0.00819747095223952	0.1475	0.1762	up
OsTN1g003089	203	381	245	429	1823	1090	298	892	2.993	1.581	0.00268372488943861	0.021839506419925	0.1889	0.1893	up
OsTN1g003091	53	58	20	65	369	263	46	183	3.979	1.992	9.05266252865484e-05	0.0015321613267772	0.163	0.125	up
OsTN1g003094	69	70	29	154	174	199	59	154	2.609	1.384	0.00132334872645907	0.0127680875532382	0.1186	0.1392	up
OsTN1g003115	2074	1482	1242	125	825	366	1683	344	0.205	-2.289	1.3404566937402e-06	4.51940621687575e-05	0.146	0.1864	down
OsTN1g003128	133	135	116	407	606	711	136	490	3.59	1.844	1.31843703540324e-05	0.000315220904281809	0.1173	0.14	up
OsTN1g003141	0	0	0	0	44	0	0	11	87.43	6.45	0.00300712217845244	0.0239384534678832	1.7605	0.2074	up
OsTN1g003143	0	0	0	1	15	5	0	5	44.631	5.48	0.0010661351590858	0.0108804274873593	0.7071	1.2515	up
OsTN1g003145	86	70	53	21	33	42	74	27	0.37	-1.435	0.000400054023720798	0.00500527768793331	0.0937	0.1987	down
OsTN1g003148	85	44	36	16	36	26	57	22	0.383	-1.386	0.000820941964976745	0.00880612860458363	0.0941	0.2028	down
OsTN1g003157	426	517	558	188	96	218	539	153	0.284	-1.816	0.000302617275664329	0.00400349629757543	0.1678	0.1704	down
OsTN1g003160	31	21	9	3	11	1	21	4	0.202	-2.306	0.00473169432722382	0.0340383451823051	0.3534	0.3641	down
OsTN1g003162	24	32	20	60	154	58	27	76	2.812	1.491	0.000450389990691666	0.0054924787421496	0.1033	0.1892	up
OsTN1g003175	18	12	27	1	2	0	20	1	0.048	-4.389	2.79635893160675e-09	2.08432989927793e-07	0.1343	0.2021	down
OsTN1g003177	59	78	48	200	211	325	66	213	3.24	1.696	0.00396281425321586	0.0297589949957325	0.2283	0.124	up
OsTN1g003181	30	14	28	72	69	116	25	75	2.922	1.547	0.000633376755224753	0.00718674202677974	0.1187	0.1995	up
OsTN1g003185	271	182	209	124	95	112	233	101	0.43	-1.219	0.00280552602997204	0.022630958736256	0.1103	0.115	down
OsTN1g003193	0	1	0	8	4	19	0	9	18.862	4.237	0.00053401885114204	0.00631267434569077	0.451	0.9265	up
OsTN1g003215	458	696	323	239	156	285	525	206	0.391	-1.356	0.00178001505997613	0.0160564778293976	0.1281	0.1573	down
OsTN1g003234	112	105	189	17	24	44	147	24	0.164	-2.609	3.20734761524567e-09	2.35732884548291e-07	0.1094	0.1341	down
OsTN1g003235	429	438	796	188	282	322	603	225	0.374	-1.419	0.000524114943088011	0.00622683787006579	0.1135	0.1678	down
OsTN1g003253	0	0	0	14	12	0	0	9	68.111	6.09	0.00229600496450119	0.0195077633342054	1.3704	0.3733	up
OsTN1g003259	0	0	0	1	12	8	0	5	44.932	5.49	0.000815503036327621	0.00877441547001515	0.6427	0.5805	up
OsTN1g003281	27	34	28	40	91	112	32	67	2.104	1.073	0.0071936076866229	0.0468822489890018	0.0914	0.1815	up
OsTN1g003287	25	5	0	11	57	360	10	110	10.911	3.448	0.000833050834954831	0.00890000456266353	0.6075	0.1437	up
OsTN1g003316	0	7	0	2	220	0	3	54	20.519	4.359	0.00503269066019788	0.0356354827481858	1.252	0.1904	up
OsTN1g003329	2	0	2	14	8	41	1	18	11.739	3.553	0.000209600662805932	0.00299730361168267	0.3729	0.2204	up
OsTN1g003331	76	94	113	48	64	26	102	41	0.402	-1.316	0.0011382859899056	0.0113919919716508	0.0994	0.1332	down
OsTN1g003384	55	48	38	27	29	21	50	23	0.458	-1.127	0.00749465729965474	0.0481926007743414	0.0972	0.1962	down
OsTN1g003388	371	338	195	80	56	75	317	64	0.202	-2.306	5.0035983163758e-06	0.000136741378215698	0.1605	0.1296	down
OsTN1g003389	94	74	30	10	17	29	69	15	0.228	-2.131	9.59720973314092e-05	0.00160132200480503	0.172	0.1872	down
OsTN1g003409	49	38	47	85	184	149	48	116	2.448	1.292	0.000647457192787017	0.00729964098215539	0.0869	0.137	up
OsTN1g003417	93	75	52	29	26	13	77	21	0.271	-1.883	0.00319678614129938	0.0251369090465465	0.2523	0.1433	down
OsTN1g003422	186	124	69	9	8	10	131	8	0.061	-4.033	8.58552287116526e-10	7.3121760453334e-08	0.2157	0.1422	down
OsTN1g003452	148	88	49	433	742	834	98	565	5.718	2.516	5.44456665418556e-10	5.15459486764791e-08	0.1016	0.1355	up
OsTN1g003471	13	9	42	0	2	0	24	0	0.028	-5.159	0.00050090435284826	0.00599135849455897	0.9523	0.2519	down
OsTN1g003481	29	40	33	56	170	144	37	100	2.758	1.464	0.00018215171120371	0.00269003575173892	0.0897	0.1536	up
OsTN1g003483	24	8	19	2	3	0	18	1	0.088	-3.504	0.00107990508566029	0.010968173923179	0.5379	0.5293	down
OsTN1g003491	86	47	22	1	11	11	53	6	0.117	-3.09	3.43487158057348e-06	9.87036878173737e-05	0.229	0.199	down
OsTN1g003516	27	25	31	5	15	7	30	7	0.258	-1.956	0.000274623416330681	0.00372851395014388	0.1371	0.2188	down
OsTN1g003523	9	8	14	32	43	46	11	35	3.112	1.638	0.00132420928771064	0.0127705804295041	0.129	0.2084	up
OsTN1g003532	120	148	64	48	48	45	117	42	0.358	-1.484	0.000417093472279588	0.00517269079920071	0.1088	0.1485	down
OsTN1g003546	103	134	28	38	15	15	93	22	0.238	-2.071	0.00059447976306629	0.00685915796264788	0.2209	0.2033	down
OsTN1g003554	980	900	490	242	538	365	831	320	0.385	-1.376	0.00418115594196321	0.0310094321087038	0.1587	0.1758	down
OsTN1g003557	1633	2383	1216	161	553	373	1860	294	0.158	-2.662	0.000656039463510829	0.0073611793135842	0.3878	0.1882	down
OsTN1g003577	11	15	10	0	1	0	13	0	0.031	-5.003	8.06617273123758e-06	0.000205847563310897	0.3569	0.6486	down
OsTN1g003600	1533	1133	831	197	484	279	1224	267	0.218	-2.195	5.71254063242887e-07	2.14075735566749e-05	0.1257	0.1887	down
OsTN1g003608	160	221	150	39	31	12	189	26	0.137	-2.865	0.00285934253138499	0.022986382510645	0.5654	0.1154	down
OsTN1g003632	124	134	103	45	79	85	128	59	0.46	-1.121	0.000664473180199217	0.00742829875196879	0.0656	0.1287	down
OsTN1g003643	79	55	50	21	10	5	64	12	0.179	-2.482	3.06278808645652e-05	0.000632449337385428	0.1944	0.1884	down
OsTN1g003645	83	97	141	20	15	21	116	17	0.144	-2.792	3.6677002654202e-08	2.03083340806178e-06	0.1412	0.1572	down
OsTN1g003661	59	70	18	88	199	222	52	140	2.718	1.442	0.00215900788454215	0.0185524798923493	0.1418	0.1296	up
OsTN1g003672	2	1	0	6	19	20	1	12	10.542	3.398	0.00104300537805726	0.0106855145180968	0.4206	0.2208	up
OsTN1g003675	43	40	51	9	30	16	48	15	0.318	-1.651	0.00116993385790145	0.011609939538662	0.145	0.2005	down
OsTN1g003684	36	19	31	77	103	169	31	99	3.238	1.695	0.00163023377305389	0.0150249316058904	0.1799	0.1937	up
OsTN1g003688	169	106	227	26	146	75	180	65	0.364	-1.457	0.00217045865130369	0.0186361935227819	0.1484	0.1211	down
OsTN1g003694	2	1	2	18	13	6	2	12	6.143	2.619	0.00287694202948774	0.0231191017883086	0.3006	0.6295	up
OsTN1g003699	393	318	413	62	202	144	401	111	0.277	-1.85	4.5946534968272e-07	1.76519595484084e-05	0.0869	0.1368	down
OsTN1g003706	307	327	305	52	91	101	335	68	0.205	-2.284	3.1611234623451e-10	3.2542691876676e-08	0.0805	0.1291	down
OsTN1g003729	6	16	3	1	0	1	9	1	0.079	-3.658	0.0015402871522296	0.0144088529498602	0.4987	0.5622	down
OsTN1g003735	17	36	77	1	4	0	48	1	0.032	-4.969	2.33770146429813e-11	3.28468656814345e-09	0.1923	0.172	down
OsTN1g003736	5	0	0	6	30	44	2	21	11.697	3.548	0.00262186622915867	0.0215011280439938	0.6886	0.2009	up
OsTN1g003743	12	11	0	146	67	89	8	97	11.965	3.581	2.68552807050611e-06	8.04406691966427e-05	0.3068	0.1979	up
OsTN1g003764	149	86	56	23	5	5	101	12	0.111	-3.168	2.03002267616645e-05	0.000453165167299598	0.3079	0.1942	down
OsTN1g003768	86	78	42	169	145	253	72	167	2.302	1.203	0.00456705729076038	0.0332282907935605	0.117	0.1174	up
OsTN1g003779	3	0	1	5	31	34	1	18	12.222	3.611	2.47264801940902e-05	0.000528924735166795	0.2656	0.2208	up
OsTN1g003783	1	0	6	12	39	16	3	18	6.948	2.797	0.00127795768025545	0.0124148641892704	0.3438	0.351	up
OsTN1g003784	209	161	118	299	444	502	171	354	2.07	1.049	0.00160751400974538	0.0148792672462815	0.074	0.1279	up
OsTN1g003787	74	36	45	128	287	181	54	167	3.07	1.618	0.000117631256398856	0.00190222544510432	0.1108	0.1385	up
OsTN1g003798	22	33	33	5	2	0	32	2	0.07	-3.828	1.26155959259658e-08	8.01014798808254e-07	0.1604	0.2061	down
OsTN1g003805	139	103	142	276	396	405	137	309	2.261	1.177	0.000205645584395141	0.00295469234977489	0.0656	0.1199	up
OsTN1g003826	200	114	209	64	122	108	186	82	0.445	-1.167	0.00400712202501446	0.0300022904821913	0.1082	0.1198	down
OsTN1g003834	334	196	178	478	978	856	247	646	2.612	1.385	0.000228148964237883	0.00319152710065487	0.0957	0.1553	up
OsTN1g003841	4	9	4	19	67	52	6	37	6.046	2.596	9.49051645004967e-05	0.00158977395226069	0.2206	0.2023	up
OsTN1g003849	3	0	0	7	784	9	1	196	175.006	7.451	0.000741108417847656	0.00814365251416574	1.9425	0.1672	up
OsTN1g003850	73	94	62	894	918	665	81	748	9.16	3.195	3.02586961232228e-06	8.87546568029302e-05	0.2809	0.1492	up
OsTN1g003851	535	645	473	7199	4862	3120	588	4836	8.217	3.039	2.47664573971154e-05	0.000528924735166795	0.3198	0.1686	up
OsTN1g003863	142	126	57	3	4	0	114	2	0.019	-5.714	1.87124476483372e-14	4.50948724179871e-12	0.2092	0.2026	down
OsTN1g003876	243	217	197	643	938	788	232	684	2.939	1.555	0.00307396851561658	0.0243790764063877	0.1875	0.1736	up
OsTN1g003879	74	96	39	20	18	10	74	15	0.2	-2.324	0.000861809949561103	0.00915192969471323	0.2909	0.204	down
OsTN1g003883	18	6	9	26	51	61	11	38	3.309	1.726	0.00178940439700113	0.0161137575571987	0.1635	0.2044	up
OsTN1g003884	249	143	178	379	712	822	200	533	2.659	1.411	0.00160648982858268	0.0148772182509838	0.1357	0.1676	up
OsTN1g003888	6	18	3	191	277	281	10	215	22.058	4.463	2.02611258229521e-16	7.81232173322446e-14	0.1359	0.13	up
OsTN1g003912	25	28	27	8	16	17	29	12	0.406	-1.299	0.00527462707740747	0.0369781872497786	0.1023	0.2125	down
OsTN1g003913	4	0	0	4	20	12	1	10	6.538	2.709	0.00320948897158308	0.0251994197039476	0.3161	0.7305	up
OsTN1g003924	655	603	543	129	151	191	639	137	0.214	-2.225	2.92363173847672e-07	1.21333577843201e-05	0.121	0.171	down
OsTN1g003934	19	15	16	36	102	94	17	63	3.555	1.83	0.00135730183382509	0.0130443461218441	0.1923	0.199	up
OsTN1g003940	169	150	122	32	56	33	156	35	0.223	-2.163	0.000615946602153999	0.00704551218547996	0.2521	0.1227	down
OsTN1g003944	180	121	147	261	437	615	158	367	2.315	1.211	0.0026419498721913	0.0216240181163879	0.1096	0.1276	up
OsTN1g003947	83	82	63	175	277	279	81	208	2.573	1.363	0.000988872417008523	0.0102748737616363	0.1115	0.1199	up
OsTN1g003954	2	4	6	13	40	54	4	28	6.511	2.703	0.000172250605964663	0.00256885977545191	0.2453	0.2043	up
OsTN1g003958	122	87	78	29	56	26	101	32	0.315	-1.667	1.03806574128606e-05	0.000255979769482017	0.0818	0.1607	down
OsTN1g003988	3	2	0	10	11	14	2	10	5.495	2.458	0.00570791654771191	0.0393185631969728	0.3115	0.3883	up
OsTN1g003995	151	124	23	5	1	2	103	3	0.025	-5.308	2.24659934424181e-10	2.41845849204752e-08	0.2908	0.2057	down
OsTN1g003997	18	7	9	21	151	200	12	96	8.058	3.01	5.71337886448157e-06	0.000153956322209734	0.244	0.149	up
OsTN1g004006	46	54	18	756	734	1104	41	760	18.28	4.192	9.22559016148123e-14	1.89948631606342e-11	0.1695	0.1396	up
OsTN1g004031	60	85	87	721	710	1139	84	749	8.956	3.163	6.18361166607198e-12	9.57196004396997e-10	0.1249	0.1537	up
OsTN1g004039	22	13	9	23	41	73	15	38	2.455	1.295	0.00499984280231154	0.0354502394880043	0.1095	0.2039	up
OsTN1g004042	654	787	1078	53	171	171	910	106	0.117	-3.092	1.06382078273515e-11	1.58876389714537e-09	0.1243	0.1852	down
OsTN1g004045	1071	1009	2146	5	1	1	1535	3	0.001	-9.423	1.6581914591046e-39	3.51652662732312e-35	0.1519	0.1854	down
OsTN1g004046	67	68	94	0	1	0	82	0	0.005	-7.661	4.52448821177749e-22	4.79754107535827e-19	0.1342	0.1973	down
OsTN1g004047	693	756	1001	0	2	4	882	1	0.002	-8.956	1.94669442118063e-26	5.16044357374721e-23	0.2218	0.1812	down
OsTN1g004051	346	342	356	109	170	205	372	137	0.368	-1.442	2.43159055043496e-05	0.000522459379970356	0.0768	0.1457	down
OsTN1g004058	251	200	247	85	177	169	248	120	0.484	-1.046	0.00281321476175226	0.0226843518830723	0.0812	0.121	down
OsTN1g004060	54	68	97	23	19	26	79	20	0.255	-1.974	1.35428666083511e-05	0.000321256792128974	0.115	0.1838	down
OsTN1g004070	6	3	18	1	0	2	10	1	0.1	-3.324	0.00358920172787423	0.0276083427794809	0.5546	0.7263	down
OsTN1g004071	13	7	22	5	0	4	15	3	0.188	-2.408	0.00171376013763843	0.0156048566933869	0.2529	0.2326	down
OsTN1g004075	10	1	2	10	43	36	4	23	5.218	2.384	0.000808285572060105	0.00871887697186095	0.2435	0.2405	up
OsTN1g004093	13	12	8	0	2	0	12	0	0.057	-4.121	0.000109512883219094	0.00179062429793935	0.3894	0.289	down
OsTN1g004097	47	40	33	111	163	210	42	137	3.232	1.692	0.000243154495306757	0.00336585481527774	0.1324	0.1479	up
OsTN1g004105	146	124	101	207	559	699	131	396	3.029	1.599	2.59480899413634e-05	0.000549731411974519	0.0949	0.1419	up
OsTN1g004113	1864	1609	2343	413	637	705	2084	498	0.239	-2.063	3.42230937547077e-06	9.84761396548285e-05	0.1307	0.1882	down
OsTN1g004118	239	150	177	43	124	123	199	79	0.396	-1.335	0.00104272086803555	0.0106855145180968	0.1084	0.1217	down
OsTN1g004126	44	27	44	304	228	290	41	250	6.095	2.608	9.68735989178736e-08	4.74456908141188e-06	0.1428	0.1585	up
OsTN1g004146	49	32	32	63	118	133	40	88	2.204	1.14	0.00203064642591716	0.017742419140266	0.0795	0.1797	up
OsTN1g004184	64	73	46	226	247	291	65	224	3.444	1.784	2.94756761240532e-06	8.69388961839772e-05	0.0905	0.1208	up
OsTN1g004205	44	21	31	40	128	359	34	139	4.103	2.037	0.00165904895368224	0.0152243406147726	0.2662	0.1168	up
OsTN1g004215	104	72	65	142	232	295	85	188	2.219	1.15	0.000282693108326029	0.00380881369013349	0.0626	0.1167	up
OsTN1g004216	5	4	0	7	43	55	3	27	8.497	3.087	0.000125645294250941	0.00201555200845666	0.3026	0.2067	up
OsTN1g004222	58	64	20	103	171	150	50	121	2.421	1.276	0.00100130741116561	0.0103887471285777	0.0924	0.1479	up
OsTN1g004225	12	12	14	132	109	299	14	155	11.339	3.503	6.01356153432963e-11	7.54613014547506e-09	0.1472	0.1403	up
OsTN1g004234	30	24	22	47	78	148	27	75	2.805	1.488	0.00242067629285272	0.0202533784477889	0.1449	0.191	up
OsTN1g004246	13	5	13	12	42	103	11	41	3.755	1.909	0.00172463277996878	0.0156769341469344	0.2061	0.2071	up
OsTN1g004258	52	31	17	124	190	186	35	143	4.095	2.034	1.76141988676783e-07	7.86512209991556e-06	0.0873	0.1444	up
OsTN1g004271	9	0	5	19	61	31	5	31	6.105	2.61	7.04155800402157e-05	0.00124753818372001	0.2004	0.2059	up
OsTN1g004277	0	0	0	2	46	47	0	24	194.851	7.606	1.01384633226674e-07	4.9200547296066e-06	0.4353	0.2184	up
OsTN1g004283	554	578	810	65	56	234	699	99	0.142	-2.817	8.31334323106508e-06	0.000211900324400477	0.248	0.1828	down
OsTN1g004298	18	40	49	8	16	14	39	11	0.277	-1.852	0.000514165956867848	0.006122356792418	0.1496	0.2027	down
OsTN1g004299	49	58	83	20	40	32	68	26	0.379	-1.398	0.000626994708891024	0.00713341029584332	0.0945	0.168	down
OsTN1g004308	70	50	30	89	197	157	52	123	2.353	1.235	0.00152458985475427	0.0142998571648712	0.0941	0.1546	up
OsTN1g004313	54	51	46	389	210	376	54	301	5.601	2.486	2.2644781083313e-07	9.7607291145085e-06	0.1409	0.1159	up
OsTN1g004330	47	25	37	69	102	148	38	90	2.336	1.224	0.00438666017342622	0.0321450940904802	0.1127	0.1634	up
OsTN1g004333	3	15	4	0	0	2	8	1	0.084	-3.57	0.00288462459926777	0.023172058286618	0.5593	0.7727	down
OsTN1g004334	18	17	2	1	0	0	13	0	0.033	-4.903	0.000200817271452025	0.00290197171163259	0.6105	0.5277	down
OsTN1g004339	60	52	71	8	21	5	66	10	0.148	-2.753	2.2275549577936e-07	9.64076693672018e-06	0.1444	0.1822	down
OsTN1g004347	72	69	47	151	217	314	66	193	2.901	1.537	3.28444722136953e-05	0.000671033451094254	0.0856	0.1186	up
OsTN1g004349	6	0	2	2	97	21	3	30	10.477	3.389	0.000602301965555338	0.00692304486912306	0.4898	0.2017	up
OsTN1g004355	11	21	8	56	53	51	14	48	3.333	1.737	0.000482380515145806	0.00579923105708453	0.131	0.1957	up
OsTN1g004359	117	52	52	466	573	760	77	518	6.741	2.753	3.85186159949396e-11	5.04237215681904e-09	0.1046	0.126	up
OsTN1g004365	105	127	55	530	528	717	101	521	5.146	2.364	7.8854741111402e-07	2.81527356018435e-05	0.145	0.137	up
OsTN1g004367	592	564	526	193	369	508	598	296	0.496	-1.013	0.00706051245065922	0.0462136689941759	0.0977	0.1746	down
OsTN1g004369	98	87	117	46	35	39	108	37	0.336	-1.575	0.000203745620796368	0.00293534876374223	0.1084	0.1468	down
OsTN1g004377	173	156	185	86	131	87	184	88	0.48	-1.059	0.000794574294125393	0.00860160135554733	0.0629	0.115	down
OsTN1g004413	1503	1151	866	168	495	319	1235	269	0.218	-2.199	1.53105386865251e-07	7.01275580831833e-06	0.1144	0.1891	down
OsTN1g004417	80	28	16	13	14	21	42	14	0.329	-1.603	0.00410366739545638	0.0305677816843847	0.178	0.2065	down
OsTN1g004426	0	0	0	0	19	0	0	5	39.275	5.296	0.00203535618219974	0.0177555732438954	0.7855	0.4283	up
OsTN1g004433	42	24	42	9	12	15	38	10	0.271	-1.885	0.00173428644844826	0.0157444403733914	0.2008	0.2044	down
OsTN1g004441	48	24	5	0	2	1	26	1	0.036	-4.797	2.64768364903671e-06	7.97218927654757e-05	0.4002	0.3354	down
OsTN1g004444	205	61	48	20	39	31	107	25	0.239	-2.068	0.00131753637702961	0.0127235855863693	0.2599	0.1712	down
OsTN1g004447	120	116	90	34	89	54	115	49	0.427	-1.227	0.00033283236764789	0.00433423031109298	0.0698	0.125	down
OsTN1g004478	8	8	6	45	53	53	8	44	5.592	2.483	0.000291291036397207	0.00389987942479518	0.2521	0.2054	up
OsTN1g004505	38	37	36	144	115	190	39	133	3.363	1.75	2.57872171156341e-06	7.82359818842993e-05	0.0803	0.1358	up
OsTN1g004506	345	289	230	1153	649	714	304	797	2.617	1.388	0.00653332592108946	0.0434333049556565	0.1788	0.1827	up
OsTN1g004509	24	9	9	34	124	139	14	79	5.411	2.436	8.77026779350995e-08	4.38622489311334e-06	0.1063	0.1819	up
OsTN1g004523	129	131	150	53	65	48	146	49	0.334	-1.583	0.00205893063189858	0.0178949761928988	0.1704	0.1349	down
OsTN1g004525	8	9	5	18	37	38	8	26	3.297	1.721	0.00239443678096193	0.0200954607049307	0.153	0.2357	up
OsTN1g004529	2188	1124	2307	50	364	82	1997	130	0.065	-3.944	7.01616475820901e-07	2.55722692207385e-05	0.3577	0.1891	down
OsTN1g004530	3585	1219	1652	42	281	34	2230	94	0.042	-4.568	4.65076200401632e-05	0.00088261437679137	0.6723	0.1768	down
OsTN1g004543	56	73	141	42	63	20	99	37	0.375	-1.414	0.00689388928569809	0.0453479700239176	0.1745	0.1204	down
OsTN1g004545	28	91	74	25	31	34	71	26	0.371	-1.431	0.00497239305361597	0.035368172502607	0.1585	0.1908	down
OsTN1g004548	330	33	2	0	19	6	119	6	0.054	-4.213	0.00100878422591909	0.0104357497946664	0.8876	0.206	down
OsTN1g004549	5901	1248	52	4	323	8	2373	82	0.035	-4.845	0.00135238707591509	0.0130186439940678	1.191	0.1814	down
OsTN1g004564	161	116	171	77	43	40	160	51	0.318	-1.653	0.00178653078215009	0.0161015547373808	0.181	0.12	down
OsTN1g004566	17	26	28	10	11	4	25	8	0.293	-1.773	0.00149707899454036	0.0141104685498744	0.1469	0.2168	down
OsTN1g004569	63	27	16	1	8	2	36	3	0.086	-3.539	3.89427721201964e-07	1.54706668083274e-05	0.2132	0.2244	down
OsTN1g004570	989	472	533	128	91	76	694	92	0.133	-2.914	4.88447963640176e-05	0.000921576153462386	0.3174	0.1805	down
OsTN1g004571	47	16	32	11	13	7	33	9	0.278	-1.847	0.00554006397729547	0.038445070931448	0.2497	0.2052	down
OsTN1g004583	0	0	0	0	98	6	0	26	205.07	7.68	0.000214938091660669	0.00305918933546832	1.3858	0.2018	up
OsTN1g004586	58	49	100	135	225	320	75	190	2.543	1.347	0.000622913115615117	0.0071060346653307	0.0994	0.117	up
OsTN1g004602	344	453	118	21	4	0	321	9	0.028	-5.17	8.36520458311819e-09	5.54377792481836e-07	0.3855	0.1295	down
OsTN1g004638	15	13	11	3	1	0	14	2	0.1	-3.321	0.00315217091658658	0.0248875981489396	0.5816	0.4793	down
OsTN1g004639	20	8	33	4	0	0	22	2	0.067	-3.891	0.00150439735752805	0.0141480065459412	0.7113	0.2461	down
OsTN1g004641	104	1123	1622	251	120	196	1064	179	0.168	-2.575	0.000556474299673267	0.00651277619932172	0.3548	0.1885	down
OsTN1g004646	732	618	426	198	315	307	624	233	0.374	-1.418	0.00024069089538329	0.00333834651301074	0.101	0.1615	down
OsTN1g004662	2017	2456	2768	268	1043	436	2605	471	0.181	-2.465	2.18092310446027e-06	6.84183968584157e-05	0.1745	0.1778	down
OsTN1g004664	73	77	121	11	27	0	98	11	0.113	-3.149	0.00575659480023642	0.0395216940585007	0.772	0.1407	down
OsTN1g004683	17	23	11	43	73	63	18	51	2.803	1.487	0.00616693028791856	0.0416238353328736	0.172	0.203	up
OsTN1g004702	50	29	41	19	18	10	42	15	0.333	-1.585	0.000957752635616263	0.0100054483465587	0.1206	0.2037	down
OsTN1g004712	10	6	12	22	38	58	10	33	3.268	1.709	0.00316023019344276	0.0249415690825952	0.1762	0.2044	up
OsTN1g004722	69	44	58	136	165	247	61	157	2.592	1.374	0.000375348355395155	0.00476362212619093	0.0936	0.1377	up
OsTN1g004724	0	0	0	0	13	0	0	3	27.37	4.775	0.00684911811297954	0.0451224752475791	0.8797	0.2232	up
OsTN1g004730	30	44	35	7	11	11	39	8	0.214	-2.225	2.01692051600398e-05	0.000451190225557979	0.1314	0.2049	down
OsTN1g004755	13	22	4	200	280	207	14	200	14.432	3.851	4.17047321675579e-07	1.63638197420788e-05	0.3124	0.1591	up
OsTN1g004761	67	103	106	17	33	51	100	28	0.282	-1.824	1.55590434162574e-05	0.000363392768423536	0.104	0.156	down
OsTN2g000034	0	0	0	1	7	17	0	6	52.964	5.727	0.0046217135303849	0.0334971561308518	1.4775	1.5553	up
OsTN2g000038	24	21	5	29	187	81	17	78	4.464	2.158	0.000819168218479834	0.00880181363512815	0.2502	0.1169	up
OsTN2g000060	28	31	29	45	170	103	31	86	2.727	1.447	0.00563082835915866	0.0389094092579595	0.1708	0.1786	up
OsTN2g000061	122	136	109	304	581	395	131	363	2.777	1.473	0.00382055254772686	0.0289779892273403	0.1748	0.1464	up
OsTN2g000115	64	48	27	207	286	224	48	209	4.286	2.1	2.47916381831018e-07	1.05151254189808e-05	0.1002	0.1199	up
OsTN2g000116	605	340	269	1805	1626	1446	422	1481	3.509	1.811	0.000271451095988616	0.00369490590027637	0.1664	0.1892	up
OsTN2g000124	11285	10185	16303	270	656	835	13589	479	0.035	-4.823	8.76054590863318e-32	4.6446224271096e-28	0.0879	0.1225	down
OsTN2g000128	3	3	1	19	34	71	2	34	13.189	3.721	9.87155823395328e-05	0.00163679542976894	0.432	0.2597	up
OsTN2g000129	14	12	10	40	56	51	13	43	3.307	1.725	0.000522710542761519	0.00621363367732261	0.127	0.2045	up
OsTN2g000140	48	44	59	28	33	24	54	25	0.462	-1.114	0.0037198554472672	0.028346020291123	0.0781	0.2014	down
OsTN2g000155	239	188	164	75	87	45	209	62	0.299	-1.744	0.000624128372631985	0.00711224631832698	0.1687	0.1161	down
OsTN2g000191	1124	1565	1841	183	255	472	1637	255	0.156	-2.682	1.03396260345706e-08	6.6851356498518e-07	0.1382	0.1882	down
OsTN2g000216	0	0	0	7	18	44	0	18	149.353	7.223	8.5420097942496e-08	4.29266354755098e-06	0.3412	0.209	up
OsTN2g000217	218	202	168	559	708	559	208	537	2.576	1.365	0.000772519546766792	0.00842737758656551	0.1116	0.1479	up
OsTN2g000224	226	289	213	44	190	196	260	114	0.44	-1.184	0.00529858929555137	0.0371339005917905	0.1213	0.1183	down
OsTN2g000225	1306	1751	1720	345	760	759	1717	515	0.3	-1.736	0.000267892495228635	0.0036582074348446	0.1536	0.1866	down
OsTN2g000243	117	139	79	174	349	385	119	252	2.126	1.088	0.00786962772471658	0.0499823884869915	0.1124	0.121	up
OsTN2g000250	37	36	53	1	1	2	45	1	0.028	-5.165	4.33519527515509e-14	9.78047725534193e-12	0.136	0.2011	down
OsTN2g000261	36	39	38	19	15	10	41	14	0.333	-1.587	0.00334944230799761	0.0261241717637754	0.1611	0.2036	down
OsTN2g000308	70	56	36	15	34	8	57	16	0.288	-1.798	0.00100179128957144	0.0103887471285777	0.1738	0.2027	down
OsTN2g000324	72	78	71	36	59	27	79	36	0.45	-1.153	0.00648954397078033	0.043208698732909	0.1085	0.1757	down
OsTN2g000343	131	150	85	20	62	58	129	38	0.296	-1.759	8.68539355019377e-05	0.00148346837548546	0.1242	0.146	down
OsTN2g000352	165	265	119	508	814	1055	195	668	3.422	1.775	3.77780887257093e-05	0.000745265048935922	0.1233	0.1676	up
OsTN2g000391	207	232	455	41	57	66	326	47	0.145	-2.79	9.16220918208435e-10	7.71043532239931e-08	0.1235	0.1289	down
OsTN2g000392	100	117	151	21	39	54	133	31	0.241	-2.054	9.65310555905252e-08	4.74456908141188e-06	0.0853	0.1363	down
OsTN2g000415	159	0	0	0	0	0	51	0	0.002	-8.681	0.000186713257802011	0.00273643957028835	1.8556	0.3903	down
OsTN2g000446	155	137	74	27	78	52	128	43	0.337	-1.568	0.00121557019635313	0.0119677795515603	0.1498	0.1542	down
OsTN2g000447	184	189	130	24	34	44	178	29	0.164	-2.611	8.9318916757188e-10	7.5465588353374e-08	0.1038	0.125	down
OsTN2g000462	48	41	72	2	4	2	58	2	0.041	-4.596	1.78139342215663e-09	1.40934268546919e-07	0.241	0.2039	down
OsTN2g000463	11	20	38	3	2	0	26	2	0.065	-3.951	4.09903585622931e-05	0.000797506911954633	0.3994	0.2206	down
OsTN2g000468	161	124	93	272	311	483	133	307	2.308	1.207	0.00146423301346251	0.0138624953198658	0.0959	0.1237	up
OsTN2g000478	9	17	33	3	6	9	22	5	0.237	-2.076	0.00247075764122954	0.0205479832539431	0.2341	0.2187	down
OsTN2g000492	16	9	24	5	6	2	18	4	0.222	-2.171	0.00115012293731027	0.0114731345517303	0.1917	0.2198	down
OsTN2g000495	45	49	28	73	151	101	43	91	2.121	1.084	0.00629240558645817	0.042282333736381	0.0955	0.1662	up
OsTN2g000512	35	36	34	102	124	155	37	110	2.937	1.554	5.59793901160146e-05	0.00103230863146984	0.0869	0.1679	up
OsTN2g000513	254	157	186	598	507	551	210	501	2.381	1.251	0.00717370274458844	0.0467812773999037	0.1484	0.1553	up
OsTN2g000519	107	31	81	282	310	372	77	282	3.663	1.873	2.33172241482156e-06	7.21971909259278e-05	0.0994	0.1178	up
OsTN2g000534	14	8	16	19	92	93	14	54	3.967	1.988	0.000553886335227537	0.00649323798295765	0.1869	0.141	up
OsTN2g000561	86	86	72	23	58	50	87	36	0.42	-1.25	0.000558081362705577	0.00652770443516938	0.0757	0.156	down
OsTN2g000562	187	223	250	14	3	2	237	7	0.026	-5.281	1.60144973607893e-22	1.99776144429564e-19	0.1195	0.1155	down
OsTN2g000573	1	2	2	10	18	18	2	13	6.872	2.781	0.000132658921228585	0.0020963470510392	0.1547	0.4019	up
OsTN2g000594	186	216	158	86	153	83	199	92	0.464	-1.106	0.00165480629381507	0.0152005756610786	0.0802	0.115	down
OsTN2g000605	18	35	12	111	72	110	23	90	3.836	1.94	4.01889846632507e-05	0.000785518707606965	0.1279	0.1874	up
OsTN2g000615	88	66	40	255	424	448	68	319	4.691	2.23	4.19984963550545e-07	1.64328802989232e-05	0.1211	0.115	up
OsTN2g000626	733	872	369	1402	2835	4016	695	2269	3.264	1.707	0.000303474880075234	0.00401233901605704	0.1515	0.1868	up
OsTN2g000650	259	250	233	40	94	107	264	66	0.252	-1.99	3.23525336820946e-06	9.37295330322651e-05	0.1157	0.1172	down
OsTN2g000656	35	13	12	45	74	96	21	60	2.897	1.535	0.00184397368479657	0.0164931041473981	0.1405	0.1983	up
OsTN2g000663	21	26	28	237	178	138	27	172	6.371	2.672	2.38259552748545e-07	1.01632917609855e-05	0.155	0.1307	up
OsTN2g000664	14	11	6	44	86	51	11	51	4.685	2.228	0.00014915461333993	0.00229045755619109	0.1869	0.2029	up
OsTN2g000669	14	50	30	6	10	12	34	8	0.235	-2.091	0.000612629797840067	0.00701893037428109	0.1961	0.208	down
OsTN2g000689	653	483	481	254	236	371	570	252	0.443	-1.176	0.00436713862060609	0.0320352503380122	0.1169	0.17	down
OsTN2g000690	707	2	1	1	1	10	228	3	0.015	-6.087	7.6349454541947e-05	0.00133482512981951	1.0703	0.1914	down
OsTN2g000694	26	30	16	74	162	126	25	101	3.955	1.984	6.07506784419991e-06	0.000162055300342072	0.1095	0.1728	up
OsTN2g000698	140	64	114	25	63	44	112	37	0.328	-1.609	0.000249713793849952	0.00344770861079162	0.1186	0.1479	down
OsTN2g000702	30	33	29	54	99	113	33	74	2.27	1.182	0.0033834256782235	0.0263314668249535	0.0944	0.1746	up
OsTN2g000718	13	2	13	10	67	115	10	50	4.995	2.32	0.000606728598722048	0.00697014810027003	0.2577	0.1924	up
OsTN2g000722	192	121	132	22	48	26	156	27	0.174	-2.526	0.00030112588454451	0.00399623068431503	0.3015	0.1353	down
OsTN2g000723	233	157	173	13	62	36	199	29	0.15	-2.737	2.55762241312277e-05	0.000544027066349995	0.257	0.1234	down
OsTN2g000745	163	103	131	45	71	67	140	52	0.373	-1.424	0.000153969599112475	0.00235147281926032	0.0874	0.1488	down
OsTN2g000746	63	46	16	4	0	0	43	2	0.032	-4.962	3.0141691187391e-08	1.70913060163369e-06	0.301	0.2491	down
OsTN2g000809	169	331	243	35	34	72	268	41	0.151	-2.725	3.36628391242949e-09	2.45322278113032e-07	0.1259	0.1178	down
OsTN2g000836	60	52	21	474	494	492	46	434	9.313	3.219	3.80379593860379e-11	5.01037891117829e-09	0.1367	0.1215	up
OsTN2g000838	176	168	139	3	41	10	171	14	0.083	-3.599	3.60463520221063e-06	0.000102746638082367	0.3385	0.1152	down
OsTN2g000839	492	613	574	5	153	7	602	41	0.069	-3.861	7.20332400232272e-05	0.00127186312927536	0.5375	0.178	down
OsTN2g000842	91	48	72	19	46	30	74	27	0.357	-1.484	0.00203411380760948	0.0177520376617178	0.14	0.1856	down
OsTN2g000843	178	128	106	38	55	30	145	36	0.25	-2.003	0.000773699865274401	0.00843591416086078	0.2251	0.1199	down
OsTN2g000857	62	113	63	11	34	46	85	24	0.29	-1.786	0.00167223576257816	0.015312220991794	0.2009	0.1809	down
OsTN2g000860	730	281	366	9	9	12	477	9	0.018	-5.756	6.97791138357505e-18	3.52334682646372e-15	0.1972	0.1338	down
OsTN2g000861	212	89	104	21	27	31	141	23	0.162	-2.624	4.81568298764464e-08	2.5920352568269e-06	0.1319	0.1328	down
OsTN2g000868	0	0	0	1	5	29	0	9	73.664	6.203	0.00117046497541657	0.011609939538662	1.178	0.3069	up
OsTN2g000871	67	22	10	6	8	5	33	6	0.168	-2.572	0.00159106586354254	0.0147855291687748	0.3658	0.2365	down
OsTN2g000873	1173	920	861	407	582	594	1043	454	0.436	-1.198	0.00101249355538144	0.010453724843707	0.0917	0.1892	down
OsTN2g000876	31	14	33	63	99	175	28	94	3.373	1.754	0.00471098857170741	0.033946970655861	0.2433	0.1865	up
OsTN2g000880	138	246	243	50	51	134	227	66	0.293	-1.772	0.0071195298262412	0.0465568513799251	0.2876	0.1192	down
OsTN2g000893	1	0	1	0	46	17	1	16	19.19	4.262	6.78661203540787e-05	0.00120842721607804	0.4007	0.3278	up
OsTN2g000895	10	4	0	0	0	0	5	0	0.026	-5.279	0.0019089274399829	0.0169312522876275	0.9211	0.3088	down
OsTN2g000900	0	10	11	1	1	0	8	1	0.09	-3.467	0.00716714041300074	0.0467672451503098	0.7	0.2765	down
OsTN2g000905	20	14	12	0	2	3	16	1	0.092	-3.437	1.70672135567254e-05	0.000391291240970244	0.228	0.4159	down
OsTN2g000934	83	6	9	1	6	6	32	3	0.111	-3.176	0.00410345326681763	0.0305677816843847	0.6836	0.3678	down
OsTN2g000959	201	221	186	35	120	68	217	61	0.281	-1.829	6.75905839236885e-06	0.000176743959712659	0.1042	0.115	down
OsTN2g000966	2	4	12	0	0	0	7	0	0.018	-5.765	0.00442691400255645	0.0323617942958341	1.6843	1.6094	down
OsTN2g000988	434	429	453	186	284	349	470	232	0.494	-1.017	0.00617961564460027	0.0416961848472918	0.0947	0.1625	down
OsTN2g001001	61	37	9	7	1	2	36	4	0.092	-3.438	0.000420300408922668	0.00520637311449942	0.4864	0.2503	down
OsTN2g001013	170	262	181	71	95	145	220	88	0.402	-1.313	0.00482290395012914	0.0345538256994556	0.1448	0.1185	down
OsTN2g001018	181	23	12	13	15	12	71	12	0.167	-2.584	0.00428183076515997	0.0315294392488707	0.4964	0.2078	down
OsTN2g001019	2724	180	176	131	129	77	1009	103	0.102	-3.292	0.00100425733132434	0.0103990650514626	0.6019	0.1495	down
OsTN2g001022	30	20	17	8	10	8	24	8	0.323	-1.63	0.00277640464011086	0.0224301764582213	0.1375	0.2991	down
OsTN2g001046	18	18	6	0	0	0	15	0	0.008	-6.887	6.90923225801189e-05	0.00122819856241122	0.9283	0.1968	down
OsTN2g001048	0	0	0	4	5	16	0	7	56.476	5.82	0.000163756442041654	0.00246997358917308	0.5005	0.8461	up
OsTN2g001051	16	12	8	146	262	269	12	190	14.905	3.898	9.6686417075077e-14	1.97156619895304e-11	0.1354	0.1153	up
OsTN2g001056	225	238	224	46	101	106	245	70	0.287	-1.803	9.41641343115628e-06	0.000234933976040625	0.1056	0.117	down
OsTN2g001113	282	159	77	17	42	16	178	21	0.119	-3.072	3.8745202000325e-06	0.000109264561013417	0.2584	0.132	down
OsTN2g001114	22	25	16	0	6	2	22	2	0.101	-3.31	0.000157775861814514	0.0024002530139888	0.358	0.3024	down
OsTN2g001152	12	14	3	0	0	1	10	0	0.039	-4.662	5.51492218027832e-05	0.00102322794993143	0.3893	0.7447	down
OsTN2g001154	123	165	244	16	5	46	193	19	0.1	-3.318	8.39149892267606e-07	2.96695189961442e-05	0.2587	0.1579	down
OsTN2g001156	53	45	8	1	0	0	36	0	0.012	-6.44	2.97413192434373e-09	2.20532922096355e-07	0.3383	0.2625	down
OsTN2g001157	73	53	98	1	17	11	80	7	0.097	-3.361	5.3522300427412e-08	2.83761856291031e-06	0.197	0.1982	down
OsTN2g001159	619	653	854	44	71	83	764	56	0.073	-3.769	2.79885408410683e-16	1.00602200951955e-13	0.1181	0.1637	down
OsTN2g001160	112	107	137	46	50	80	127	51	0.398	-1.328	0.000340670080133249	0.0044160087954681	0.0842	0.1465	down
OsTN2g001179	14	5	11	2	3	0	11	1	0.148	-2.751	0.00590679193340249	0.0403301147880446	0.4446	0.9307	down
OsTN2g001225	13	14	1	30	228	96	10	92	9.375	3.229	0.00367258213341278	0.0281076571076089	0.721	0.1861	up
OsTN2g001234	8	15	17	63	74	71	15	61	4.188	2.066	0.000525261180693431	0.0062334716614245	0.2034	0.1643	up
OsTN2g001239	0	1	1	16	9	31	1	17	19.569	4.29	2.16569458161204e-05	0.000476430342243221	0.3296	0.259	up
OsTN2g001263	86	49	86	109	237	224	79	158	2.016	1.012	0.00555224074962277	0.0384975142909527	0.0852	0.123	up
OsTN2g001282	4	1	17	0	1	1	8	1	0.082	-3.605	0.00234559002658562	0.0198373915120993	0.5385	0.5959	down
OsTN2g001284	13	31	47	1	1	5	34	2	0.063	-3.999	9.42990556496775e-08	4.66153863208091e-06	0.2222	0.2105	down
OsTN2g001307	17	23	11	2	0	0	18	1	0.04	-4.638	1.28185784683472e-06	4.34949749725181e-05	0.281	0.2897	down
OsTN2g001309	74	79	48	8	39	19	71	18	0.253	-1.985	9.81342701313981e-05	0.00162970514226825	0.1504	0.1835	down
OsTN2g001310	48	37	27	10	22	21	39	15	0.378	-1.403	0.00632893057501412	0.0425008330286018	0.147	0.2027	down
OsTN2g001311	580	492	267	127	335	186	468	179	0.384	-1.382	0.00128739410673025	0.0124950877901274	0.1251	0.1627	down
OsTN2g001316	54	39	52	166	257	348	52	217	4.212	2.074	7.26566338565337e-10	6.42012180914796e-08	0.066	0.1166	up
OsTN2g001317	1333	407	620	223	141	138	815	158	0.193	-2.37	2.70164322467431e-05	0.00056726483035315	0.2051	0.1743	down
OsTN2g001335	47	80	103	14	8	14	83	11	0.13	-2.943	1.18245664650649e-07	5.63513665223892e-06	0.1619	0.1818	down
OsTN2g001345	39	50	53	202	96	131	51	137	2.668	1.416	0.0049167709133827	0.0350736208648384	0.1635	0.1337	up
OsTN2g001347	179	101	86	286	436	641	127	383	3.001	1.586	4.57149829263259e-05	0.000870267183948469	0.0995	0.1222	up
OsTN2g001361	31	0	18	0	3	2	17	1	0.086	-3.542	0.00156025466367129	0.0145686001460634	0.6032	0.4469	down
OsTN2g001362	162	140	117	779	619	926	148	696	4.695	2.231	2.13035117551971e-06	6.70302038267752e-05	0.1427	0.1421	up
OsTN2g001381	22	14	11	6	4	0	16	3	0.194	-2.364	0.00369772748843399	0.0282179585632312	0.3142	0.5099	down
OsTN2g001398	244	228	196	130	126	99	236	108	0.452	-1.146	0.00387322731496064	0.0292311457884772	0.1045	0.1272	down
OsTN2g001410	169	141	145	35	95	128	161	70	0.435	-1.202	0.00357167154044305	0.0274934440501545	0.1109	0.115	down
OsTN2g001423	2	0	0	5	14	16	1	9	11.933	3.577	0.00760990546813357	0.0487562734932655	0.7858	1.2215	up
OsTN2g001441	53	73	72	17	38	25	71	22	0.317	-1.657	0.000285560349517711	0.00383283438748234	0.1206	0.1799	down
OsTN2g001442	0	0	0	1	12	29	0	11	88.209	6.463	2.0588904091933e-05	0.000457203025212172	0.5037	0.3567	up
OsTN2g001443	4	13	12	0	2	0	11	0	0.062	-4.008	0.00248537015203366	0.0206614052583998	0.7556	0.5378	down
OsTN2g001454	796	538	900	1713	2014	2511	797	1810	2.27	1.183	0.00733951570691076	0.0475409620025829	0.1357	0.1888	up
OsTN2g001536	4	1	1	18	12	26	2	17	7.538	2.914	0.00074167634649029	0.00814538077680973	0.3177	0.4848	up
OsTN2g001538	4	0	12	24	40	52	6	33	5.513	2.463	0.00102566855106592	0.0105386325593312	0.2952	0.2265	up
OsTN2g001555	4	13	7	142	81	148	9	114	12.941	3.694	5.51218710676855e-06	0.000149675994844098	0.352	0.1901	up
OsTN2g001584	1	0	1	15	42	20	1	21	25.769	4.688	1.86919725771296e-05	0.000422601985547109	0.4293	0.2875	up
OsTN2g001594	180	166	108	71	88	78	160	70	0.433	-1.206	0.00325615323624648	0.0254799747879433	0.1089	0.1227	down
OsTN2g001630	3	0	0	3	29	19	1	13	11.609	3.537	5.53742733514387e-05	0.0010256089213659	0.2422	0.2924	up
OsTN2g001649	178	138	128	64	95	91	157	71	0.458	-1.128	0.0050515654086595	0.0357571921299873	0.105	0.1373	down
OsTN2g001674	0	0	0	0	16	6	0	6	45.469	5.507	0.00195740883787421	0.0172745606428624	0.919	0.6091	up
OsTN2g001694	10	5	12	21	77	80	10	47	4.912	2.296	0.000459443733931331	0.00559003055965676	0.2374	0.2072	up
OsTN2g001723	2	0	2	6	26	13	1	12	8.011	3.002	0.000410102215235747	0.00510989287808724	0.2463	0.476	up
OsTN2g001815	33	25	18	43	154	69	27	72	2.705	1.436	0.00483393029239221	0.0346211278996156	0.1583	0.1735	up
OsTN2g001816	1935	1600	1481	399	975	975	1773	644	0.363	-1.46	9.38987783290336e-05	0.00158166115331518	0.0958	0.185	down
OsTN2g001873	67	132	258	10	15	33	169	16	0.097	-3.373	3.00577955871259e-08	1.70894281773775e-06	0.2054	0.1205	down
OsTN2g001876	5	391	1	1	21	7	145	7	0.052	-4.262	0.00116256289624061	0.0115477617520256	0.9307	0.1985	down
OsTN2g001877	2	423	0	2	16	3	155	5	0.036	-4.781	0.00338471158413841	0.0263314668249535	1.3779	0.1949	down
OsTN2g001880	23	41	30	3	1	1	34	2	0.047	-4.403	8.43768454240942e-10	7.21524097140632e-08	0.1707	0.2211	down
OsTN2g001890	4	2	12	29	31	36	7	28	4.251	2.088	0.00120893879611119	0.0119135525321236	0.2059	0.211	up
OsTN2g001899	74	70	41	100	209	210	65	144	2.214	1.147	0.00237340814642697	0.0199733597465384	0.09	0.1182	up
OsTN2g001907	7	9	11	74	75	52	10	61	6.185	2.629	7.26931558634866e-07	2.64426030256769e-05	0.1388	0.1979	up
OsTN2g001910	138	110	124	350	505	500	132	389	2.946	1.559	1.13991295355854e-05	0.000276591922266772	0.0824	0.1354	up
OsTN2g001943	2	3	0	20	35	20	2	22	11.511	3.525	0.000712140294898008	0.00789046981917558	0.502	0.3866	up
OsTN2g001950	5	6	10	34	90	30	8	43	5.603	2.486	0.00558791434121633	0.0386758810163755	0.469	0.1394	up
OsTN2g001959	0	0	0	0	38	2	0	10	79.859	6.319	0.00267991416557056	0.0218168674507696	1.6097	0.1991	up
OsTN2g001985	103	121	155	17	17	31	136	19	0.138	-2.861	1.78819141278199e-11	2.56230914127484e-09	0.0958	0.1261	down
OsTN2g002024	50	45	36	12	20	27	46	17	0.36	-1.474	0.00641564588212866	0.0428930019616339	0.1708	0.2043	down
OsTN2g002025	64	86	89	14	24	23	86	18	0.202	-2.305	1.20464755489233e-07	5.70244658406288e-06	0.1013	0.173	down
OsTN2g002041	31	19	15	65	112	124	23	85	3.709	1.891	5.5768965425087e-05	0.00102932328091368	0.1264	0.1875	up
OsTN2g002043	205	36	12	17	10	14	84	13	0.151	-2.731	0.000221414299829749	0.00311995551926212	0.319	0.1959	down
OsTN2g002045	6	3	6	8	21	38	5	18	3.371	1.753	0.00582585829923037	0.0398931149343812	0.1822	0.2479	up
OsTN2g002059	53	11	9	31	128	123	24	75	3.028	1.598	0.00718963132347951	0.0468707382345619	0.2217	0.1819	up
OsTN2g002082	2392	2312	2100	954	1413	1546	2417	1116	0.462	-1.114	0.00158472324618245	0.0147335492686502	0.087	0.1783	down
OsTN2g002085	138	146	107	19	113	80	139	56	0.405	-1.303	0.00187089146565712	0.016656589131902	0.1127	0.1151	down
OsTN2g002093	19	26	26	0	2	2	25	1	0.048	-4.371	7.07063860035643e-09	4.77538321011971e-07	0.1784	0.2162	down
OsTN2g002129	34	27	34	0	10	12	34	5	0.177	-2.498	2.5947898055033e-05	0.000549731411974519	0.1712	0.2058	down
OsTN2g002133	1103	1109	2211	336	717	793	1606	510	0.318	-1.655	0.000299069661297702	0.00397640771607546	0.1423	0.1853	down
OsTN2g002166	210	273	238	57	63	29	259	45	0.174	-2.52	2.01636973673338e-07	8.85324078817905e-06	0.1426	0.1227	down
OsTN2g002167	520	617	568	128	84	43	610	82	0.134	-2.901	5.96031283849326e-08	3.12099640409695e-06	0.1744	0.1756	down
OsTN2g002183	739	1113	584	408	428	300	867	343	0.395	-1.341	0.00467374965910657	0.0337474324210668	0.1548	0.1669	down
OsTN2g002213	1	0	0	4	10	30	0	12	25.175	4.654	9.92344478844668e-05	0.00164282977071498	0.43	0.6122	up
OsTN2g002234	3	1	0	20	13	9	1	13	8.769	3.132	0.00105947324725924	0.0108385186467085	0.3642	0.4969	up
OsTN2g002241	79	79	70	33	72	33	81	39	0.483	-1.05	0.00767075429577373	0.0490868093996601	0.093	0.1715	down
OsTN2g002261	9	10	8	23	43	64	10	36	3.731	1.9	0.000103888779284434	0.00170920817865398	0.1102	0.2158	up
OsTN2g002270	38	47	118	294	257	476	75	300	4.029	2.01	0.0040185649482048	0.0300711739084613	0.3201	0.1151	up
OsTN2g002285	31	40	137	13	9	3	77	8	0.104	-3.264	0.000414871277302531	0.00514814229242526	0.4807	0.2012	down
OsTN2g002289	66	51	45	131	193	210	57	152	2.663	1.413	2.35038435769215e-05	0.00050965849768484	0.0669	0.1309	up
OsTN2g002312	2	5	4	16	43	45	4	28	7.032	2.814	2.58080838023203e-05	0.000547859893088896	0.1936	0.2527	up
OsTN2g002328	199	154	69	2	3	1	146	2	0.013	-6.303	1.13843553124104e-10	1.34126679505715e-08	0.3755	0.1898	down
OsTN2g002330	256	128	215	98	89	94	211	85	0.398	-1.33	0.000899610529680985	0.00947741704070772	0.1046	0.1157	down
OsTN2g002332	55	44	96	2	1	0	70	1	0.014	-6.129	4.92841314260104e-14	1.08871726578271e-11	0.2067	0.1739	down
OsTN2g002334	20	9	27	0	0	0	20	0	0.006	-7.334	1.87848664345315e-06	6.04507833804415e-05	0.628	0.3108	down
OsTN2g002335	0	0	2	10	8	14	1	10	11.254	3.492	0.000154125864986648	0.00235147281926032	0.2063	0.5287	up
OsTN2g002336	12	30	0	0	0	0	15	0	0.008	-6.9	0.00185250745030932	0.0165481535439063	1.9553	1.3839	down
OsTN2g002341	126	50	79	243	408	389	89	295	3.305	1.725	8.55311821892884e-05	0.00146752409440796	0.1253	0.1157	up
OsTN2g002344	249	136	171	341	532	509	195	395	2.019	1.014	0.00260454689352035	0.0214170709464467	0.0765	0.135	up
OsTN2g002348	20	15	22	0	0	1	20	0	0.02	-5.651	3.79911079382667e-08	2.09811829699693e-06	0.2764	0.4386	down
OsTN2g002349	70	126	162	16	6	41	131	18	0.14	-2.834	1.64146523686593e-07	7.47007581077591e-06	0.1657	0.1424	down
OsTN2g002358	304	263	161	806	1166	1440	255	970	3.798	1.925	1.33639265284827e-05	0.000317722858620552	0.1295	0.1802	up
OsTN2g002362	53	18	1	2	3	0	24	1	0.066	-3.919	0.00147487324130473	0.0139321322175276	0.7468	0.502	down
OsTN2g002370	129	136	93	14	63	57	127	36	0.285	-1.81	3.0044334569175e-06	8.83703471856441e-05	0.089	0.1289	down
OsTN2g002377	15	13	3	1	1	1	10	1	0.092	-3.448	0.00748115491918296	0.0481495758334182	0.7833	0.5651	down
OsTN2g002378	74	76	86	5	0	2	84	3	0.028	-5.181	6.04691337121544e-09	4.13667393107632e-07	0.3329	0.1825	down
OsTN2g002381	166	136	32	5	9	20	115	9	0.083	-3.598	1.03855339620515e-08	6.69440786423177e-07	0.2064	0.1916	down
OsTN2g002383	183	177	236	18	42	37	214	27	0.127	-2.98	1.17103891492285e-10	1.3720564789375e-08	0.1212	0.1186	down
OsTN2g002385	123	280	191	40	84	36	215	45	0.212	-2.236	1.74978071092147e-06	5.69134962216437e-05	0.1349	0.1171	down
OsTN2g002410	209	225	91	10	15	3	184	8	0.045	-4.473	2.10589813424888e-16	7.97496102375287e-14	0.1364	0.1488	down
OsTN2g002411	27	18	7	1	1	3	18	1	0.085	-3.555	0.000362564154714411	0.00463186628254729	0.4437	0.3153	down
OsTN2g002412	56	24	20	0	1	2	34	1	0.027	-5.19	2.03852432778904e-06	6.45238588349584e-05	0.472	0.5305	down
OsTN2g002413	19	15	19	5	0	0	19	2	0.095	-3.399	0.000846616193882918	0.00901314740144329	0.4715	0.5194	down
OsTN2g002440	7	0	16	373	150	276	8	255	30.088	4.911	1.92845945012713e-05	0.000434149039902824	0.6615	0.1174	up
OsTN2g002441	10	1	5	55	38	44	6	43	7.412	2.89	0.000117374724979262	0.00190012655926352	0.2904	0.2085	up
OsTN2g002442	0	3	1	76	13	61	1	49	31.033	4.956	2.00102435161957e-05	0.000448106899945049	0.585	0.2062	up
OsTN2g002444	88	58	54	124	499	241	70	232	3.308	1.726	9.58256109151025e-05	0.00160132200480503	0.1258	0.1196	up
OsTN2g002456	55	30	38	142	234	308	43	192	4.426	2.146	9.78641510621425e-08	4.77104609557438e-06	0.0964	0.1201	up
OsTN2g002498	2	6	2	33	54	31	4	34	9.257	3.211	5.92282722519029e-07	2.19206626465289e-05	0.1664	0.2189	up
OsTN2g002508	47	48	28	14	23	15	43	15	0.345	-1.533	0.00215590465553099	0.0185402554865554	0.1371	0.2055	down
OsTN2g002511	70	41	34	8	42	16	51	18	0.354	-1.498	0.00294046038288987	0.023513704125168	0.147	0.2044	down
OsTN2g002532	8	8	6	20	175	65	8	67	8.537	3.094	1.32597360683064e-05	0.000316309586952276	0.268	0.1811	up
OsTN2g002546	327	253	193	717	882	1005	271	755	2.781	1.476	0.00048571049523786	0.00583265145668703	0.1215	0.167	up
OsTN2g002561	42	47	33	2	8	5	43	4	0.098	-3.358	9.61257892717407e-05	0.00160136654602184	0.387	0.2122	down
OsTN2g002565	88	99	39	481	807	786	79	588	7.39	2.886	2.32140180010901e-08	1.35247164766241e-06	0.1621	0.1567	up
OsTN2g002566	29	47	15	232	442	346	32	288	8.902	3.154	2.11456385606566e-10	2.29966952285048e-08	0.1399	0.1151	up
OsTN2g002575	313	309	354	150	226	224	349	172	0.492	-1.024	0.00441771607123695	0.032316835019911	0.0875	0.1328	down
OsTN2g002604	12	16	15	2	4	7	15	3	0.243	-2.041	0.00151825030741298	0.014259315442563	0.167	0.4548	down
OsTN2g002605	135	192	64	42	28	37	138	33	0.237	-2.074	0.00196144844060116	0.0172958158336086	0.2854	0.1679	down
OsTN2g002615	476	273	286	94	262	214	362	155	0.431	-1.215	0.00146651457234344	0.0138779002836623	0.0984	0.1527	down
OsTN2g002633	90	56	25	19	12	18	59	15	0.253	-1.985	0.00343639032722394	0.0266163366214164	0.2782	0.2058	down
OsTN2g002637	2	0	4	16	16	22	2	16	6.99	2.805	3.54190269164658e-05	0.000708614437563671	0.1372	0.2348	up
OsTN2g002638	0	0	0	1	49	7	0	14	114.885	6.844	0.000301718919396915	0.00399747075973057	1.1085	0.1151	up
OsTN2g002645	117	122	47	333	294	345	100	292	2.906	1.539	0.00399892100415624	0.0299558875786441	0.1912	0.1187	up
OsTN2g002646	27	31	15	60	92	138	26	81	3.15	1.655	0.000983379574017037	0.0102286222809048	0.1516	0.1841	up
OsTN2g002648	72	16	56	185	227	321	50	210	4.159	2.056	0.000791352094353282	0.00858424750125322	0.241	0.1307	up
OsTN2g002651	142	149	184	17	36	20	170	20	0.122	-3.036	3.03836882939298e-15	8.94926218957458e-13	0.0765	0.1178	down
OsTN2g002660	2	0	0	13	16	24	1	15	18.502	4.21	1.4829029511373e-06	4.95242880075097e-05	0.1912	0.4844	up
OsTN2g002666	40	25	11	4	2	1	26	2	0.085	-3.554	2.16443574137277e-05	0.000476430342243221	0.3037	0.2527	down
OsTN2g002667	268	248	126	54	11	24	225	30	0.132	-2.926	4.7677819776546e-07	1.81526664991241e-05	0.1981	0.1317	down
OsTN2g002682	12	7	3	20	159	80	8	67	8.689	3.119	7.41986224928746e-07	2.67607174694965e-05	0.2015	0.1868	up
OsTN2g002688	83	89	32	8	4	0	71	4	0.055	-4.181	5.82445565894736e-07	2.17277895747665e-05	0.3332	0.2058	down
OsTN2g002707	3	1	0	4	11	68	1	22	14.597	3.868	0.00319541353077104	0.0251354357370406	0.845	0.4103	up
OsTN2g002708	8	7	5	22	48	41	7	31	4.326	2.113	0.000313533596284932	0.00412475618884277	0.1648	0.2145	up
OsTN2g002711	21	40	5	7	7	6	23	6	0.257	-1.961	0.00739971730169855	0.0477370331561409	0.2871	0.2065	down
OsTN2g002712	116	161	46	375	727	1212	114	634	5.578	2.48	0.000110866466871509	0.00180996548340577	0.2623	0.1648	up
OsTN2g002713	110	90	127	58	27	28	117	37	0.309	-1.695	0.000614966190699564	0.00703809390510829	0.1521	0.1518	down
OsTN2g002740	0	0	3	62	41	54	1	48	39.929	5.319	1.2744165911543e-10	1.45304046497899e-08	0.2175	0.207	up
OsTN2g002746	261	258	127	48	123	206	227	101	0.45	-1.153	0.00680521477331129	0.0448890170132543	0.1217	0.1165	down
OsTN2g002757	0	0	3	6	14	14	1	9	7.814	2.966	0.00742337401249702	0.0478081582907576	0.5121	0.7609	up
OsTN2g002771	54	68	73	87	326	199	70	165	2.354	1.235	0.00444796644215737	0.0324821020450521	0.1229	0.1152	up
OsTN2g002773	0	6	7	0	0	0	5	0	0.025	-5.312	0.00676361367622765	0.0446701822584116	1.584	1.644	down
OsTN2g002776	0	0	0	0	24	0	0	6	48.536	5.601	0.00542843654646928	0.0378562492078178	1.4749	0.3279	up
OsTN2g002785	7	9	68	158	198	331	32	195	6.21	2.635	5.82387776079028e-06	0.000156536090840405	0.2023	0.117	up
OsTN2g002787	6	6	6	1	195	4	7	49	7.538	2.914	0.00758034229287922	0.0485815409504653	0.6947	0.2002	up
OsTN2g002790	12	12	51	1	2	6	28	2	0.093	-3.425	0.00267847394385111	0.0218168674507696	0.6926	0.1989	down
OsTN2g002791	0	7	11	0	1	0	7	0	0.058	-4.1	0.00534242213081842	0.0373670007019348	0.8634	0.444	down
OsTN2g002792	0	5	5	117	91	96	4	93	24.674	4.625	2.00255475888266e-09	1.54993353181112e-07	0.2604	0.1995	up
OsTN2g002796	44	38	32	106	175	168	40	127	3.157	1.659	0.00108065111362474	0.0109704969682336	0.1626	0.148	up
OsTN2g002822	11	5	11	61	147	114	10	89	9.207	3.203	3.9243055134255e-07	1.5555653649199e-05	0.2087	0.1155	up
OsTN2g002829	6	0	3	27	50	49	3	35	10.859	3.441	2.21184967562103e-07	9.59763646541585e-06	0.1761	0.2389	up
OsTN2g002845	0	0	4	22	7	61	2	26	16.39	4.035	0.000118194669253208	0.001907575609477	0.4743	0.2358	up
OsTN2g002855	110	147	336	55	91	73	218	63	0.288	-1.796	0.00123470670458478	0.0121094601662425	0.202	0.1632	down
OsTN2g002874	3	0	4	11	18	34	3	17	6.736	2.752	0.00215392644754109	0.0185307578795148	0.3759	0.209	up
OsTN2g002892	0	1	0	51	29	21	0	33	67.454	6.076	5.50158867798188e-08	2.90229331079507e-06	0.3596	0.2966	up
OsTN2g002907	24	36	40	1	2	0	36	1	0.027	-5.205	3.00647579745797e-11	4.06104026985294e-09	0.1822	0.2053	down
OsTN2g002908	71	90	120	1	1	6	101	2	0.023	-5.419	5.59681265847635e-17	2.37383212096616e-14	0.1523	0.1675	down
OsTN2g002923	13	7	9	20	36	49	10	29	2.846	1.509	0.00475974392874758	0.0341937295043868	0.1427	0.2087	up
OsTN2g002930	236	204	160	121	108	74	212	93	0.438	-1.192	0.00575670830134901	0.0395216940585007	0.1237	0.115	down
OsTN2g002934	592	434	357	1396	2871	3090	485	2040	4.201	2.071	2.91763361509176e-07	1.21322070735786e-05	0.1076	0.1829	up
OsTN2g002947	35	1	2	1	0	0	12	0	0.035	-4.832	0.00177431483592856	0.0160255088268897	0.9735	0.7578	down
OsTN2g002965	417	528	269	1550	1324	1318	429	1273	2.962	1.566	0.00191212797651572	0.016945465105712	0.1739	0.189	up
OsTN2g002968	15	5	5	117	88	105	8	94	10.78	3.43	8.85320882700688e-06	0.000222980997142916	0.3213	0.1988	up
OsTN2g002972	321	136	186	522	694	863	224	596	2.656	1.409	0.000417446759727221	0.00517404642521051	0.108	0.1571	up
OsTN2g002981	31	8	7	1	6	3	16	2	0.181	-2.47	0.00502473939167138	0.0356029563244821	0.3887	0.2724	down
OsTN2g002989	0	0	3	0	69	58	1	31	25.981	4.699	0.000238104276256578	0.00330679593095825	0.7188	0.1983	up
OsTN2g003011	2	4	6	20	14	31	4	19	4.315	2.109	0.00771898655625652	0.0493061891260639	0.3149	0.3272	up
OsTN2g003023	30	11	19	103	137	143	21	111	5.234	2.388	1.92948338527209e-06	6.13471576483737e-05	0.1433	0.1799	up
OsTN2g003048	6	5	4	259	285	549	5	312	57.482	5.845	3.44826554142797e-22	3.84880880721384e-19	0.1445	0.1152	up
OsTN2g003050	6	10	12	19	41	53	10	31	3.071	1.619	0.00382666476620999	0.0289863646175282	0.1611	0.2239	up
OsTN2g003082	102	34	103	325	255	582	84	339	4.002	2.001	0.0029162716203185	0.0233710243995361	0.2967	0.1196	up
OsTN2g003091	14	2	6	68	66	82	8	64	8.227	3.04	8.39426198787501e-07	2.96695189961442e-05	0.1914	0.201	up
OsTN2g003112	44	48	0	0	0	0	31	0	0.004	-7.991	4.55493290553138e-05	0.000867892741487907	1.2484	0.7088	down
OsTN2g003122	0	0	0	31	25	31	0	26	210.021	7.714	9.09727480325234e-09	5.99148778734697e-07	0.3507	0.2408	up
OsTN2g003128	957	775	457	1553	2001	2752	765	1804	2.357	1.237	0.00260569580449478	0.0214182135371786	0.1172	0.188	up
OsTN2g003131	41	76	40	12	4	14	56	9	0.163	-2.614	0.000126913000333911	0.00203281268737255	0.2582	0.202	down
OsTN2g003145	76	28	30	69	128	230	46	117	2.528	1.338	0.000948374705475281	0.00991724969379402	0.1011	0.1296	up
OsTN2g003167	11	17	11	26	38	69	14	37	2.664	1.414	0.00535043323109091	0.0374106948670442	0.1366	0.2077	up
OsTN2g003173	92	51	41	237	388	265	64	256	3.988	1.996	7.53479900114985e-07	2.703864737312e-05	0.1012	0.116	up
OsTN2g003182	10	12	13	5	2	0	13	2	0.183	-2.447	0.00545790223064494	0.038011734845743	0.3448	0.4431	down
OsTN2g003194	45	49	38	75	247	384	47	187	4.006	2.002	1.29131694952032e-05	0.0003094345598698	0.1306	0.1168	up
OsTN2g003219	17	18	4	26	87	82	14	53	3.835	1.939	0.00167705081195022	0.0153430615051891	0.2211	0.202	up
OsTN2g003221	294	106	79	8	40	4	164	14	0.087	-3.528	1.0310216011138e-05	0.000254538708903613	0.3612	0.152	down
OsTN2g003240	66	37	15	444	884	1675	40	818	20.109	4.33	4.36267667155534e-08	2.36622210162849e-06	0.3368	0.1892	up
OsTN2g003245	997	1068	651	2202	2527	2556	959	2140	2.23	1.157	0.00452640775898148	0.0330094667622834	0.1159	0.1821	up
OsTN2g003247	2	0	0	0	5	41	1	12	14.76	3.884	0.0053904437943823	0.0376284205225363	0.8726	0.4339	up
OsTN2g003254	213	185	136	29	73	35	188	38	0.204	-2.292	2.70193147534596e-07	1.13017476918465e-05	0.1198	0.1315	down
OsTN2g003273	28	11	10	58	101	102	17	74	4.305	2.106	1.58906649993983e-05	0.000369510233160351	0.131	0.2018	up
OsTN2g003274	282	208	182	332	728	1057	236	578	2.447	1.291	0.00308325114183298	0.0244344196430687	0.1302	0.1649	up
OsTN2g003286	335	227	186	527	656	870	262	590	2.253	1.172	0.00107036082282244	0.010913049023844	0.0875	0.1672	up
OsTN2g003295	13	9	25	22	77	82	17	48	2.86	1.516	0.0063577192294119	0.0426553695841793	0.1797	0.2005	up
OsTN2g003296	32	34	31	77	78	112	35	78	2.249	1.17	0.00396566912518077	0.0297656552186666	0.0966	0.1489	up
OsTN2g003301	14	15	25	20	71	110	20	53	2.746	1.458	0.00650162633086386	0.0432632537178004	0.1689	0.2022	up
OsTN2g003364	100	135	137	53	83	88	134	64	0.477	-1.069	0.00159780298487308	0.0148161818540461	0.0707	0.122	down
OsTN2g003375	186	202	135	44	80	100	185	62	0.339	-1.562	1.65077213048434e-05	0.000380934979011768	0.0822	0.1184	down
OsTN2g003380	764	574	445	1600	2299	2601	626	1857	2.968	1.57	5.82171278625654e-05	0.00106707919669959	0.1039	0.1892	up
OsTN2g003385	14	5	14	51	62	86	12	57	4.849	2.278	1.59857050179829e-05	0.000371313084683858	0.1452	0.188	up
OsTN2g003400	27	7	13	35	91	88	16	58	3.572	1.837	0.000318827770938565	0.00417483368975574	0.1456	0.2021	up
OsTN2g003404	113	152	73	46	71	59	120	51	0.422	-1.244	0.003771925710591	0.0286809711525649	0.1172	0.1458	down
OsTN2g003411	0	0	0	1	17	34	0	13	108.009	6.755	1.89291223959973e-05	0.000427507879288515	0.5978	0.2055	up
OsTN2g003423	0	0	0	0	10	5	0	4	31.54	4.979	0.00666206428881023	0.0440945001285186	1.0546	0.4698	up
OsTN2g003424	120	146	126	45	79	89	140	60	0.429	-1.222	9.35509323604307e-05	0.00157785595418274	0.0584	0.125	down
OsTN2g003431	0	0	0	3	11	1	0	4	34.241	5.098	0.00261659504023281	0.0214662015544361	0.7185	0.9707	up
OsTN2g003435	218	122	293	720	1155	1993	227	1074	4.735	2.244	0.000132305786004143	0.0020923257298955	0.2247	0.1848	up
OsTN2g003439	54	55	49	1	17	43	56	15	0.285	-1.81	0.00231180841412243	0.0195938512453669	0.2125	0.1933	down
OsTN2g003448	144	117	104	313	341	548	129	347	2.688	1.427	0.000128517672147958	0.00204763821308379	0.0915	0.1266	up
OsTN2g003519	106	11	28	8	14	9	49	9	0.183	-2.451	0.000734200195118415	0.00808420744438018	0.3016	0.202	down
OsTN2g003535	9	5	1	10	57	48	5	30	5.738	2.521	0.00263587837684104	0.0215826535666671	0.3824	0.2862	up
OsTN2g003536	10	7	5	27	30	51	8	31	3.955	1.984	0.000662485300455396	0.00740998194449239	0.1665	0.2333	up
OsTN2g003542	1	1	0	4	10	20	1	9	11.306	3.499	0.000851293186005789	0.00905839166865267	0.3568	0.2445	up
OsTN2g003571	697	1121	1407	334	624	586	1172	434	0.37	-1.433	0.000742563982359527	0.00815090806102406	0.1238	0.1884	down
OsTN2g003572	14	9	13	55	66	121	13	69	5.342	2.417	1.27178633769421e-05	0.000305444766290839	0.1662	0.1989	up
OsTN2g003577	17	1	0	200	66	321	6	177	29.125	4.864	4.83332529351362e-06	0.000132883208403987	0.5596	0.1612	up
OsTN2g003583	49	38	37	110	246	225	44	161	3.669	1.875	2.93434269740448e-06	8.67902448868295e-05	0.0968	0.118	up
OsTN2g003585	10	9	7	16	62	62	9	37	4.058	2.021	6.75996618897384e-05	0.00120570734204851	0.1212	0.2003	up
OsTN2g003587	249	251	199	37	151	117	248	81	0.33	-1.599	0.000288473226890484	0.00386718701764386	0.1275	0.1181	down
OsTN2g003612	33	52	1	2	1	2	30	2	0.053	-4.237	2.08962679151112e-05	0.000463058676777181	0.4327	0.2157	down
OsTN2g003617	46	27	23	86	128	213	33	120	3.556	1.83	0.000107296186429018	0.00175573319876557	0.1358	0.1664	up
OsTN2g003621	1	3	2	18	117	113	2	64	28.614	4.839	1.20683329862034e-10	1.39854173572904e-08	0.2138	0.1538	up
OsTN2g003636	54	74	97	0	3	1	81	1	0.015	-6.03	1.06914279479308e-23	1.61952223208406e-20	0.0943	0.1303	down
OsTN2g003645	7	5	5	0	2	0	6	0	0.11	-3.181	0.00422332726989409	0.0311961342433452	0.4168	0.9077	down
OsTN2g003646	18	20	10	17	110	152	17	72	4.275	2.096	5.6711040062322e-05	0.00104217593293038	0.153	0.1469	up
OsTN2g003681	20	2	1	11	46	46	7	27	3.509	1.811	0.00551058839788982	0.0382781029001144	0.228	0.2038	up
OsTN2g003714	126	230	104	63	22	12	165	33	0.202	-2.31	0.00514179606698019	0.0362567250746906	0.433	0.1301	down
OsTN2g003723	136	111	150	47	45	86	141	52	0.363	-1.461	0.000461983557570589	0.00561449014636073	0.1096	0.1231	down
OsTN2g003725	168	162	177	11	20	84	181	31	0.171	-2.548	0.000298806620595257	0.00397540276221054	0.3084	0.1169	down
OsTN2g003726	11	0	2	30	34	21	4	26	5.565	2.476	0.000504795284653655	0.0060310949868451	0.2421	0.272	up
OsTN2g003794	4	0	7	12	36	19	4	18	4.606	2.204	0.000643288198206154	0.00726809420317416	0.1677	0.2411	up
OsTN2g003835	80	110	76	19	17	19	95	17	0.172	-2.542	2.05327783986018e-08	1.22314222331221e-06	0.109	0.1827	down
OsTN2g003836	40	79	58	4	3	19	64	7	0.115	-3.119	4.02382904974947e-05	0.000785758219687266	0.3159	0.204	down
OsTN2g003837	196	318	198	27	17	36	255	24	0.094	-3.413	2.69504513533638e-08	1.55309299415974e-06	0.213	0.1154	down
OsTN2g003858	10	21	18	41	92	97	18	63	3.585	1.842	0.00017520345165025	0.00260922724659189	0.1337	0.1969	up
OsTN2g003863	1	0	1	0	19	13	1	8	9.952	3.315	0.00458810559743739	0.0333333180557913	0.5199	0.3775	up
OsTN2g003875	167	177	155	523	460	442	178	432	2.429	1.28	0.00106432498296081	0.0108709806695926	0.1032	0.1387	up
OsTN2g003884	7	18	19	3	5	3	16	3	0.203	-2.301	0.00120404403004553	0.0118779203298624	0.2154	0.2872	down
OsTN2g003902	175	109	90	239	338	385	130	275	2.105	1.073	0.00418644358854568	0.0310209326283327	0.0939	0.1202	up
OsTN2g003933	0	0	0	2	22	23	0	12	99.259	6.633	1.15317037410422e-06	3.95077287942299e-05	0.3277	0.2942	up
OsTN2g003937	64	47	44	109	234	280	55	172	3.141	1.651	1.58612278811709e-05	0.000369230581422603	0.09	0.1282	up
OsTN2g003955	119	92	118	45	71	60	117	51	0.431	-1.214	0.00112884498856997	0.0113333893362913	0.0854	0.1287	down
OsTN2g003960	37	33	1	1	0	0	24	0	0.018	-5.83	6.43060805687585e-06	0.000168988729940726	0.5655	0.3673	down
OsTN2g003974	1	0	0	8	26	15	0	13	28.549	4.835	2.60773418543561e-05	0.000550270834532668	0.3782	0.2054	up
OsTN2g004004	902	1027	1094	416	415	434	1083	376	0.347	-1.525	0.00257394851146051	0.0212065757896438	0.175	0.1893	down
OsTN2g004011	7	0	1	0	54	18	3	18	6.375	2.672	0.00433019040476544	0.0318302765732619	0.441	0.1779	up
OsTN2g004024	5	0	4	65	85	162	3	88	26.658	4.737	6.1305152384796e-15	1.64569413496755e-12	0.1365	0.1949	up
OsTN2g004025	10	8	6	89	83	115	9	85	9.86	3.302	4.07373545594015e-09	2.89905059778936e-07	0.153	0.1925	up
OsTN2g004028	0	0	0	5	9	1	0	5	36.201	5.178	0.00560073544828933	0.0387519728064834	1.1206	0.1994	up
OsTN2g004029	0	0	0	0	32	1	0	8	66.013	6.045	0.00609646764515734	0.0413060029874926	1.9151	0.1241	up
OsTN2g004030	18	3	5	16	147	334	9	127	14.162	3.824	3.24355967794474e-05	0.000664600677199749	0.4587	0.115	up
OsTN2g004033	256	155	95	444	733	765	175	550	3.13	1.646	2.60527478776642e-05	0.000550270834532668	0.1018	0.1418	up
OsTN2g004037	129	78	110	162	297	367	112	230	2.053	1.038	0.00668152260311037	0.0441830526486316	0.0972	0.1161	up
OsTN2g004048	9	11	15	4	0	4	13	3	0.197	-2.341	0.00124458289705652	0.0121630735013261	0.193	0.329	down
OsTN2g004053	40	28	41	0	5	6	39	3	0.079	-3.657	1.80556311680002e-06	5.83697820396008e-05	0.2718	0.2158	down
OsTN2g004106	37	29	38	9	8	14	37	9	0.245	-2.029	0.000243309069261129	0.00336585481527774	0.1563	0.2036	down
OsTN2g004107	92	85	99	28	17	14	99	19	0.186	-2.426	9.05301570501995e-07	3.17334386870013e-05	0.1361	0.1439	down
OsTN2g004116	0	0	0	10	17	9	0	10	84.051	6.393	0.000251603817799538	0.00346478062602259	0.8512	0.9575	up
OsTN2g004122	261	285	233	41	92	68	277	56	0.203	-2.301	1.35304741247126e-07	6.28710821259532e-06	0.1177	0.124	down
OsTN2g004132	8	11	7	40	23	33	9	30	3.154	1.657	0.00393764375355678	0.0296014218651821	0.1672	0.2131	up
OsTN2g004136	22	24	11	287	286	350	20	273	13.484	3.753	8.44728873189184e-13	1.49284710114359e-10	0.145	0.1178	up
OsTN2g004137	27	35	47	69	128	109	39	86	2.196	1.135	0.00314405713902001	0.0248327820287513	0.0869	0.1691	up
OsTN2g004144	0	1	0	0	3	33	0	9	19.435	4.281	0.00433663499117857	0.0318445354078684	0.8945	0.4903	up
OsTN2g004155	54	61	49	22	36	29	58	25	0.427	-1.228	0.00567913826896185	0.0391962790673622	0.1141	0.1874	down
OsTN2g004165	3	5	1	11	19	18	3	14	4.146	2.052	0.00360950397387673	0.0277343299905811	0.195	0.3313	up
OsTN2g004171	0	0	0	0	13	2	0	4	31.39	4.972	0.00560867988812516	0.0387689942592798	0.9553	0.1594	up
OsTN3g000015	14	14	11	80	84	77	14	72	5.133	2.36	1.60748829852234e-06	5.26893421124625e-05	0.1263	0.1822	up
OsTN3g000024	36	25	17	2	11	8	27	5	0.213	-2.228	0.00043844890005792	0.00538712967759461	0.2	0.2144	down
OsTN3g000025	44	22	3	45	297	391	23	190	8.065	3.012	8.88701880661491e-05	0.00151007668598348	0.3513	0.1421	up
OsTN3g000028	578	208	42	15	24	13	278	15	0.055	-4.192	0.00275937228832458	0.0223265960009536	1.0775	0.118	down
OsTN3g000034	50	43	59	3	17	18	54	10	0.191	-2.387	4.34156097545202e-06	0.000121392624028931	0.1406	0.2066	down
OsTN3g000039	97	0	0	0	0	0	31	0	0.004	-7.971	0.00110878022845234	0.0111864425807749	2.2741	0.6972	down
OsTN3g000044	35	33	34	0	16	0	36	4	0.117	-3.097	0.000347739440728436	0.0044966526338585	0.4015	0.1944	down
OsTN3g000054	99	84	105	109	338	332	103	210	2.052	1.037	0.00352321243085974	0.0271796165955774	0.0825	0.1159	up
OsTN3g000056	4	1	8	10	30	54	5	25	5.313	2.41	0.000398154609605529	0.00498739799521823	0.2156	0.2228	up
OsTN3g000057	21	18	0	0	0	0	13	0	0.009	-6.751	0.00101476185961975	0.0104637341515049	1.5906	1.4354	down
OsTN3g000064	0	0	0	0	10	104	0	29	233.218	7.866	2.74286821006038e-05	0.000574782669276191	1.0223	0.2006	up
OsTN3g000075	100	55	83	123	247	270	84	177	2.116	1.081	0.00250088517865849	0.0207253895989881	0.0821	0.1157	up
OsTN3g000081	33	47	20	175	202	175	35	163	4.587	2.198	7.24404823032698e-06	0.000187118795152916	0.1452	0.1388	up
OsTN3g000089	26	2	4	8	91	167	11	68	6.28	2.651	0.00411512012892494	0.0306208254646004	0.5127	0.1537	up
OsTN3g000103	3	2	0	8	59	124	2	49	26.555	4.731	3.45307549817662e-06	9.9092519742668e-05	0.4493	0.2048	up
OsTN3g000106	38	20	46	37	382	177	37	153	4.116	2.041	0.00302318059371416	0.024048233627493	0.3038	0.123	up
OsTN3g000108	106	93	87	225	316	248	101	229	2.26	1.176	0.00183548432979764	0.0164449160042326	0.0935	0.115	up
OsTN3g000120	160	124	98	32	57	91	134	50	0.373	-1.422	7.07807270722698e-05	0.00125296066696296	0.0778	0.1301	down
OsTN3g000124	0	0	3	10	12	14	1	11	8.679	3.118	0.00178287170609594	0.0160754082785615	0.3652	0.1192	up
OsTN3g000127	36	10	14	30	120	100	21	67	3.216	1.685	0.00552865510921577	0.0383910245255858	0.2272	0.2022	up
OsTN3g000130	130	53	82	199	257	432	92	252	2.714	1.44	0.00488158915244179	0.0349011564156971	0.175	0.1213	up
OsTN3g000131	55	35	35	53	147	158	44	97	2.215	1.147	0.00570053598655606	0.0392886794497544	0.1064	0.1495	up
OsTN3g000134	1	4	4	10	37	44	3	24	7.281	2.864	0.000155871134371456	0.0023729785689989	0.2565	0.2146	up
OsTN3g000154	1	6	6	5	81	23	5	28	5.731	2.519	0.00703628974475045	0.0461263049820472	0.485	0.1849	up
OsTN3g000166	18	16	13	30	125	58	16	57	3.443	1.783	0.000200881523679759	0.00290197171163259	0.1252	0.1857	up
OsTN3g000173	23	55	19	54	226	263	35	143	4.135	2.048	0.000152489295843845	0.00233827946273349	0.1813	0.1369	up
OsTN3g000174	67	116	40	135	304	471	79	248	3.126	1.644	0.00356283737072784	0.0274653188371593	0.2111	0.125	up
OsTN3g000180	0	0	0	7	12	4	0	7	54.304	5.763	8.39586452278436e-05	0.00144404784213048	0.3778	0.2624	up
OsTN3g000182	854	497	484	205	291	323	641	235	0.366	-1.452	0.00450458268355295	0.032861604736879	0.1784	0.154	down
OsTN3g000188	27	24	8	1	564	207	20	190	9.238	3.208	0.00243953662746626	0.0203601941199044	0.667	0.1153	up
OsTN3g000191	245	91	121	369	429	360	158	342	2.158	1.11	0.00693096354728829	0.0455484796861924	0.1146	0.1201	up
OsTN3g000213	113	104	67	344	557	581	100	420	4.197	2.069	1.30192210519877e-07	6.0814674195926e-06	0.0975	0.1243	up
OsTN3g000221	47	20	17	59	70	122	29	71	2.451	1.293	0.0046061734761768	0.0334187892265759	0.1244	0.1918	up
OsTN3g000222	28	7	14	64	241	439	17	196	11.468	3.52	1.77586688639062e-05	0.000404519968417678	0.3809	0.1213	up
OsTN3g000231	30	37	19	172	176	260	30	177	5.8	2.536	3.23096535896778e-08	1.80313374651657e-06	0.1216	0.1464	up
OsTN3g000256	289	454	172	1142	1037	1248	325	1024	3.154	1.657	0.00107379720931373	0.0109375684043786	0.1739	0.1838	up
OsTN3g000268	140	131	75	43	40	18	121	31	0.257	-1.961	0.0049799209060438	0.0353799606882649	0.3124	0.1887	down
OsTN3g000272	52	37	43	933	678	1312	46	869	18.568	4.215	3.21246775283897e-09	2.35732884548291e-07	0.2753	0.1865	up
OsTN3g000273	161	259	130	80	124	129	196	95	0.484	-1.047	0.00318510564845789	0.02508226345594	0.0821	0.1194	down
OsTN3g000274	226	276	119	53	130	120	219	83	0.382	-1.389	0.000440223990560633	0.00540267949526583	0.1018	0.118	down
OsTN3g000275	477	554	586	135	339	374	580	232	0.4	-1.323	0.00477332174746158	0.0342564583074172	0.1508	0.1867	down
OsTN3g000277	62	50	46	97	239	223	56	154	2.75	1.459	0.0036782439319633	0.0281227405343674	0.1642	0.1313	up
OsTN3g000295	10	6	7	1	1	2	8	1	0.154	-2.701	0.00242100789197646	0.0202533784477889	0.2651	0.4139	down
OsTN3g000301	1886	2024	2152	525	432	651	2169	479	0.221	-2.179	8.65183482349672e-07	3.05290284695333e-05	0.1287	0.1788	down
OsTN3g000302	249	200	217	41	62	118	236	61	0.262	-1.935	7.27398686249326e-08	3.71709492512999e-06	0.0794	0.1156	down
OsTN3g000307	36	29	10	202	60	64	26	111	4.234	2.082	0.00713051660418246	0.0465999585901071	0.3807	0.1605	up
OsTN3g000340	31	23	0	0	1	0	18	0	0.021	-5.561	0.00567329973327305	0.0391773583339373	1.8177	1.111	down
OsTN3g000362	9	10	2	0	0	0	7	0	0.017	-5.897	0.000485652603490454	0.00583265145668703	0.8874	1.7186	down
OsTN3g000377	5	2	2	0	0	0	3	0	0.038	-4.706	0.00201664745518933	0.0176547917977214	0.4988	1.3544	down
OsTN3g000378	308	235	132	18	16	13	235	14	0.06	-4.06	4.91118052081523e-15	1.37041322769643e-12	0.1347	0.1155	down
OsTN3g000392	29	34	10	78	122	95	25	85	3.295	1.72	0.000254526733198454	0.00349821674072561	0.1299	0.1997	up
OsTN3g000396	24	44	41	350	258	327	39	285	7.213	2.851	3.29924124166871e-09	2.41265548317477e-07	0.1357	0.1283	up
OsTN3g000404	127	117	60	193	286	400	107	248	2.326	1.218	0.00378962459389936	0.0287949010257341	0.118	0.1218	up
OsTN3g000412	39	41	29	35	237	180	39	117	3.052	1.61	0.00054174442062441	0.00638784264260892	0.1344	0.1313	up
OsTN3g000443	22	46	41	4	11	12	39	7	0.193	-2.371	2.29010071424534e-06	7.11738277434408e-05	0.1149	0.2025	down
OsTN3g000455	1442	1129	1031	3033	3676	4759	1270	3310	2.606	1.382	0.000210479032449597	0.00300581066744688	0.0961	0.1714	up
OsTN3g000473	50	10	25	169	137	221	29	157	5.312	2.409	0.00176620064275465	0.0159794441258097	0.3719	0.1685	up
OsTN3g000481	11902	14755	11206	3939	4594	3310	13500	3525	0.261	-1.937	3.81444995528878e-05	0.000751096009301849	0.1486	0.1293	down
OsTN3g000502	230	221	145	511	555	694	210	515	2.447	1.291	0.00162464784547139	0.0149888659106122	0.1141	0.136	up
OsTN3g000518	0	0	2	4	16	9	1	8	9.545	3.255	0.000855077387780955	0.00908970302673469	0.257	0.5727	up
OsTN3g000525	205	141	167	28	63	74	181	45	0.252	-1.987	4.01182151777118e-08	2.20983633577593e-06	0.078	0.1151	down
OsTN3g000527	128	74	123	40	82	48	115	48	0.418	-1.259	0.00736224944931887	0.0476154998693825	0.1421	0.1531	down
OsTN3g000542	2	0	2	3	46	16	1	17	10.938	3.451	0.000628728989429206	0.0071454746403136	0.4357	0.2177	up
OsTN3g000554	938	1308	951	6150	3738	3534	1143	4251	3.719	1.895	0.000725928503743804	0.00802228545017971	0.2115	0.1674	up
OsTN3g000555	406	525	308	2246	2431	2405	440	2096	4.762	2.251	2.60557217028861e-06	7.88250627893161e-05	0.1499	0.189	up
OsTN3g000564	8	8	5	1	0	0	8	0	0.058	-4.118	0.00255392653628074	0.021102522329735	0.6776	0.7947	down
OsTN3g000611	92	78	73	15	12	16	86	13	0.149	-2.751	3.04568729003413e-08	1.7223970762601e-06	0.1288	0.1692	down
OsTN3g000612	259	187	52	16	101	68	172	48	0.284	-1.816	0.00262905661596671	0.0215434326332326	0.2383	0.1371	down
OsTN3g000630	70	91	64	27	47	50	81	35	0.437	-1.193	0.00253360659680393	0.020963790518307	0.0923	0.1637	down
OsTN3g000638	11	4	16	22	48	100	11	46	4.121	2.043	0.00241521157173712	0.0202288277258409	0.2609	0.1853	up
OsTN3g000681	8	9	3	84	151	150	7	108	15.121	3.919	5.77189806598262e-13	1.0832269228787e-10	0.1324	0.1914	up
OsTN3g000689	228	187	105	343	441	519	182	375	2.064	1.045	0.00580670851753586	0.039792523535309	0.0976	0.1279	up
OsTN3g000692	28	15	4	246	135	238	16	191	11.725	3.551	2.15652785561823e-08	1.2739132655737e-06	0.219	0.1397	up
OsTN3g000704	88	63	94	193	317	402	87	256	2.934	1.553	0.000184891709497641	0.00271546855629089	0.1121	0.1174	up
OsTN3g000713	70	86	79	2	31	18	84	13	0.159	-2.648	3.43702368961409e-05	0.000694180584625201	0.2372	0.1742	down
OsTN3g000714	82	180	70	44	41	7	119	29	0.245	-2.032	0.00716540562398102	0.0467672451503098	0.3657	0.1752	down
OsTN3g000728	1931	2222	2020	259	916	866	2205	546	0.248	-2.012	9.18092933257878e-06	0.00022932858463604	0.1368	0.1827	down
OsTN3g000736	48	15	36	35	88	290	34	109	3.145	1.653	0.00309424500164833	0.0245032314226871	0.1984	0.1191	up
OsTN3g000739	96	93	255	1	1	0	163	1	0.004	-7.857	4.91408401247918e-23	6.51331122829037e-20	0.168	0.1466	down
OsTN3g000740	59	48	113	0	0	1	80	0	0.005	-7.612	2.41896169290982e-20	2.05195682486154e-17	0.1505	0.115	down
OsTN3g000771	18	6	3	0	0	0	9	0	0.013	-6.217	0.000283623911659343	0.00381650526304549	0.9229	1.26	down
OsTN3g000781	91	48	26	10	34	17	57	17	0.296	-1.757	0.00426432195965843	0.0314332456211878	0.2301	0.2072	down
OsTN3g000783	106	67	39	8	29	19	73	15	0.208	-2.264	0.00299207856386166	0.0238455505839212	0.3586	0.1952	down
OsTN3g000793	33	27	28	55	104	76	31	67	2.129	1.09	0.00770621235865157	0.0492542632579638	0.0965	0.1992	up
OsTN3g000812	265	139	125	1045	1138	1019	184	952	5.166	2.369	2.11462798355926e-08	1.25616010216642e-06	0.1141	0.1832	up
OsTN3g000814	57	48	32	60	122	188	48	101	2.109	1.077	0.00614334123269419	0.0415609913656031	0.0951	0.1575	up
OsTN3g000821	24	53	35	4	17	8	40	8	0.2	-2.32	1.98307493326975e-05	0.000445027196929645	0.1467	0.2089	down
OsTN3g000830	10	1	24	1	0	0	13	0	0.034	-4.894	0.000224414053898491	0.0031517541993545	0.6202	0.6193	down
OsTN3g000833	49	39	148	702	674	1731	87	883	10.19	3.349	6.17683433606654e-06	0.000163945088566913	0.3258	0.1602	up
OsTN3g000845	20	12	9	80	122	154	14	101	6.957	2.798	5.17499190263209e-10	4.96588476376103e-08	0.1019	0.1819	up
OsTN3g000846	150	114	44	639	1657	2530	107	1301	12.181	3.607	0.000128293149042911	0.00204763821308379	0.5175	0.1757	up
OsTN3g000847	44	49	81	10	11	10	63	9	0.146	-2.778	4.45210317102781e-05	0.000852897488238362	0.2556	0.2023	down
OsTN3g000889	26	30	5	33	187	171	21	102	4.793	2.261	0.00235496510773679	0.0198849602377808	0.3435	0.1774	up
OsTN3g000890	2	1	2	4	15	33	2	14	7.365	2.881	0.00139783799432533	0.0133531307863321	0.3377	0.3483	up
OsTN3g000919	1	0	0	2	24	17	0	11	23.831	4.575	0.000789519364755183	0.00856874983027798	0.6633	0.4349	up
OsTN3g000922	4	1	1	0	42	35	2	19	8.864	3.148	0.000869667251064817	0.00920311047571436	0.4144	0.2096	up
OsTN3g000936	172	148	67	33	24	23	135	25	0.18	-2.47	1.10011937521191e-07	5.2664179661668e-06	0.1237	0.1572	down
OsTN3g000952	20	4	27	46	72	74	18	55	2.989	1.58	0.00319392429472745	0.0251330436060427	0.1666	0.201	up
OsTN3g000965	3	2	4	19	29	31	3	23	6.796	2.765	2.4410210331167e-05	0.00052395478794844	0.1634	0.2327	up
OsTN3g000973	37	18	17	38	89	86	25	59	2.338	1.225	0.0026688756519532	0.0217885287819071	0.0917	0.1844	up
OsTN3g001018	19	10	12	83	55	107	14	74	5.07	2.342	0.00249503209200646	0.020701152415955	0.3628	0.2047	up
OsTN3g001022	77	65	52	12	26	14	68	15	0.216	-2.209	6.66768227414775e-07	2.44216818631868e-05	0.1027	0.1788	down
OsTN3g001032	2	10	14	29	68	68	10	46	4.728	2.241	0.00102108025476406	0.0105167794865379	0.2599	0.1891	up
OsTN3g001070	22	14	5	47	223	244	14	135	9.458	3.242	9.27279516044796e-08	4.59458334036495e-06	0.201	0.1158	up
OsTN3g001094	1078	458	298	181	281	224	628	197	0.314	-1.67	0.000654874238415759	0.00735915493244087	0.1617	0.1522	down
OsTN3g001096	6	5	1	0	0	0	4	0	0.029	-5.107	0.000382933795345311	0.00483385535588572	0.3836	0.9149	down
OsTN3g001097	4	7	10	0	2	2	8	1	0.159	-2.657	0.00416104326560747	0.0308974885934356	0.3037	0.3017	down
OsTN3g001098	120	139	142	50	38	103	144	56	0.385	-1.377	0.00464765234065816	0.0336162220969773	0.1542	0.1255	down
OsTN3g001106	37	22	31	132	110	119	32	109	3.417	1.773	0.000145793483962678	0.00225352945655723	0.1311	0.1841	up
OsTN3g001107	94	45	91	352	262	170	82	247	3.019	1.594	0.00324378496778749	0.0254028610826696	0.1943	0.1171	up
OsTN3g001108	33	26	24	148	101	90	29	106	3.599	1.847	0.00115782899811343	0.0115223273406812	0.2008	0.1793	up
OsTN3g001114	3	0	4	15	33	29	3	21	8.252	3.045	0.000488762632690437	0.00586266354720933	0.3485	0.2071	up
OsTN3g001116	0	0	0	78	24	81	0	58	458.06	8.839	3.60491359142281e-12	5.79162140403814e-10	0.313	0.208	up
OsTN3g001117	11	7	2	735	135	385	7	423	59.949	5.906	3.11795620474457e-10	3.2254876699521e-08	0.3932	0.1168	up
OsTN3g001121	1	4	1	22	59	68	2	40	17.957	4.166	3.77351469360168e-07	1.51275852754652e-05	0.2752	0.225	up
OsTN3g001128	38	32	27	193	209	289	34	201	5.848	2.548	7.94641507359637e-07	2.83226259606316e-05	0.1591	0.1408	up
OsTN3g001133	388	329	86	25	94	37	278	42	0.153	-2.708	7.85774599460652e-05	0.00136701574493536	0.291	0.1343	down
OsTN3g001142	33	31	28	77	146	156	33	106	3.241	1.696	6.53813894350317e-06	0.000171389755963995	0.0799	0.1593	up
OsTN3g001156	35	47	56	22	187	972	50	302	6.048	2.597	0.0032421314713306	0.0253992915081301	0.4905	0.1368	up
OsTN3g001158	3146	596	3681	428	1037	235	2639	482	0.183	-2.452	0.000793191951469708	0.00859102232626052	0.3451	0.1736	down
OsTN3g001164	24	28	11	0	1	5	22	2	0.078	-3.679	0.000819709620850573	0.00880181363512815	0.5924	0.2011	down
OsTN3g001174	500	535	516	223	232	237	553	206	0.37	-1.433	8.57449760585751e-05	0.00146881559553651	0.0894	0.1572	down
OsTN3g001180	146	154	104	287	366	659	143	371	2.593	1.374	0.000422804422115346	0.00522822937597676	0.1013	0.1478	up
OsTN3g001187	159	185	206	347	673	746	197	492	2.49	1.316	0.000825006936165598	0.00883876659106338	0.1048	0.1571	up
OsTN3g001188	152	117	223	683	817	947	177	711	4.017	2.006	0.000733517420398363	0.00808420744438018	0.2334	0.176	up
OsTN3g001189	15	14	24	42	104	66	19	59	3.083	1.624	0.00168799598304843	0.0154099573019837	0.1544	0.1986	up
OsTN3g001232	6	2	1	25	56	81	3	44	13.689	3.775	9.63678180774387e-07	3.36684072152923e-05	0.2645	0.2055	up
OsTN3g001233	29	21	5	165	269	420	19	238	12.437	3.637	5.38763941300972e-09	3.74608750923597e-07	0.2121	0.115	up
OsTN3g001234	15	29	10	68	69	64	19	60	3.096	1.63	0.000560734387840903	0.00655178741759892	0.1239	0.2021	up
OsTN3g001254	83	118	14	99	876	508	75	382	5.081	2.345	0.000982151108047593	0.010225075379659	0.3252	0.1428	up
OsTN3g001275	185	214	232	15	35	37	226	24	0.107	-3.22	1.00866256563789e-15	3.24101621658828e-13	0.0859	0.1155	down
OsTN3g001276	951	1455	1430	63	72	74	1384	61	0.044	-4.496	7.88187266928072e-15	2.08938592121795e-12	0.1772	0.1893	down
OsTN3g001277	14	7	19	0	0	2	15	1	0.047	-4.409	0.000144618257369274	0.002241900134525	0.5124	0.4458	down
OsTN3g001278	78	86	156	45	42	52	116	42	0.354	-1.497	0.000610904566655896	0.00700654119523259	0.1183	0.1359	down
OsTN3g001280	34	39	32	73	86	135	38	84	2.249	1.169	0.00197751175723631	0.0174085063660068	0.0827	0.1645	up
OsTN3g001283	11	18	8	39	98	61	13	55	4.156	2.055	3.14600886612137e-05	0.00064837133162134	0.1266	0.1916	up
OsTN3g001285	223	183	159	325	533	839	199	472	2.369	1.244	0.00152005148913059	0.0142699123196071	0.1045	0.1431	up
OsTN3g001288	0	0	0	2	43	37	0	20	168.685	7.398	1.71844839739186e-07	7.77039129285484e-06	0.4161	0.2009	up
OsTN3g001303	25	9	16	39	73	96	17	57	3.285	1.716	0.00187538082496875	0.0166755560398793	0.1778	0.1987	up
OsTN3g001321	0	2	0	33	20	69	1	36	42.394	5.406	1.49033462734403e-06	4.96162110550781e-05	0.4541	0.2368	up
OsTN3g001350	0	1	0	2	87	30	0	30	62.1	5.957	1.84115831267839e-05	0.000418045442579984	0.6768	0.3163	up
OsTN3g001358	233	97	128	355	448	616	159	407	2.549	1.35	0.00102485217490799	0.0105386325593312	0.1138	0.1307	up
OsTN3g001364	1	0	1	16	12	62	1	25	30.316	4.922	7.30229655745907e-07	2.65170895708963e-05	0.3204	0.2446	up
OsTN3g001368	28	40	99	228	181	308	62	213	3.463	1.792	0.00384136547367754	0.0290527238232095	0.2519	0.1363	up
OsTN3g001400	74	47	51	114	202	259	60	161	2.649	1.405	0.000344069126181903	0.00445462390655654	0.097	0.1236	up
OsTN3g001404	266	285	683	0	26	10	451	9	0.021	-5.581	1.01365877435903e-14	2.62154410095511e-12	0.239	0.173	down
OsTN3g001417	0	0	0	17	9	0	0	9	71.59	6.162	0.00244731280574515	0.0204090297567587	1.4477	1.1645	up
OsTN3g001422	37	12	37	85	111	222	31	117	3.843	1.942	8.97461008566676e-05	0.00152131313190206	0.1488	0.1479	up
OsTN3g001425	20	5	24	42	75	98	17	60	3.425	1.776	0.00205660547047667	0.0178820960280438	0.1958	0.1964	up
OsTN3g001439	16	9	13	100	122	184	13	116	8.58	3.101	8.19022728139451e-11	9.9925763474849e-09	0.1145	0.1641	up
OsTN3g001442	29	24	24	5	11	4	27	6	0.212	-2.239	0.00015452804061517	0.00235591384423142	0.1628	0.2602	down
OsTN3g001450	75	104	98	19	17	44	100	23	0.231	-2.116	7.56693711314869e-07	2.71067627294838e-05	0.1027	0.1623	down
OsTN3g001461	0	0	0	0	5	30	0	9	72.881	6.187	0.000429874617633386	0.00530637428181095	0.8759	0.8694	up
OsTN3g001468	365	324	337	697	1001	1566	364	919	2.52	1.334	0.00102396544645739	0.0105362616317428	0.1131	0.1792	up
OsTN3g001473	503	896	1091	58	92	223	906	102	0.113	-3.145	2.56475276664627e-07	1.08348031717664e-05	0.2249	0.1855	down
OsTN3g001474	374	543	654	17	94	213	569	84	0.148	-2.753	6.40317372629561e-06	0.000168476557336912	0.2316	0.1688	down
OsTN3g001490	248	66	129	7	71	6	153	22	0.143	-2.808	0.00232163106693342	0.0196624720592879	0.5227	0.1188	down
OsTN3g001494	62	48	37	135	187	296	52	175	3.371	1.753	6.20969411977487e-05	0.00112747417121632	0.12	0.1283	up
OsTN3g001507	157	170	185	19	15	14	183	15	0.079	-3.665	2.57341997243039e-14	6.06383526170346e-12	0.1168	0.1206	down
OsTN3g001535	6	0	6	18	31	42	4	25	5.861	2.551	0.00136031922801218	0.013059434073542	0.3202	0.2635	up
OsTN3g001542	1578	1212	1346	541	721	1103	1465	671	0.458	-1.126	0.00195202450357049	0.0172342281535404	0.092	0.1844	down
OsTN3g001545	2	11	5	67	19	42	7	42	6.277	2.65	0.000863678289477659	0.00915801274247636	0.3445	0.2182	up
OsTN3g001546	1	4	4	34	18	19	3	23	6.669	2.737	0.0013310026112043	0.012824430884057	0.3517	0.431	up
OsTN3g001547	37	29	22	107	129	242	31	135	4.363	2.125	3.98718485601569e-06	0.000112143540108123	0.1257	0.1498	up
OsTN3g001550	42	33	30	1	16	9	37	7	0.191	-2.386	1.03987016350543e-05	0.000256126905429263	0.1402	0.207	down
OsTN3g001553	177	172	146	74	131	88	176	84	0.477	-1.069	0.00376898289574071	0.0286691834303983	0.0883	0.1243	down
OsTN3g001561	33	1	2	0	0	0	12	0	0.01	-6.576	0.00110638088956706	0.0111728664404994	1.5293	1.3057	down
OsTN3g001565	1	1	4	14	27	41	2	23	9.992	3.321	2.30813023096913e-05	0.000502551517537601	0.2422	0.2244	up
OsTN3g001584	58	31	15	188	135	132	36	141	3.922	1.972	0.00299810155411806	0.0238756063305226	0.2825	0.1535	up
OsTN3g001585	52	38	38	77	146	148	45	104	2.297	1.2	0.00382699989262377	0.0289863646175282	0.1064	0.1609	up
OsTN3g001588	5	2	2	3	15	53	3	18	5.72	2.516	0.00645261594651246	0.0430587244737853	0.4386	0.2122	up
OsTN3g001590	65	65	44	115	289	231	62	175	2.844	1.508	0.000276567444686533	0.00374205766828595	0.1092	0.1189	up
OsTN3g001603	3	0	4	14	28	64	3	29	11.103	3.473	4.97285185542382e-06	0.000136076476513513	0.2367	0.2227	up
OsTN3g001610	35	26	30	60	89	114	32	74	2.307	1.206	0.00786237998108323	0.04995131583548	0.1245	0.1957	up
OsTN3g001613	6	4	0	7	33	38	3	20	5.81	2.538	0.00267026860490293	0.0217885287819071	0.3572	0.2066	up
OsTN3g001621	48	60	32	98	173	206	50	133	2.69	1.428	0.000491857493400663	0.00589311969635472	0.1043	0.1374	up
OsTN3g001652	305	390	484	8	20	6	426	10	0.023	-5.451	6.25278302392254e-24	1.02002130452558e-20	0.1283	0.1446	down
OsTN3g001666	0	0	0	9	6	16	0	9	73.61	6.202	0.000527244932583701	0.00624828409147241	0.9295	0.5855	up
OsTN3g001690	0	0	0	188	0	0	0	75	596.889	9.221	0.000234509465875716	0.00326328231156582	2.0299	0.275	up
OsTN3g001700	33	28	20	73	133	133	29	95	3.329	1.735	3.31357151179896e-05	0.000675032767057833	0.1003	0.164	up
OsTN3g001704	168	213	101	446	1136	1192	170	757	4.442	2.151	6.14512311709388e-05	0.00111766403039631	0.1881	0.17	up
OsTN3g001718	116	174	172	379	397	546	167	386	2.317	1.212	0.0052526365969346	0.0368813511486255	0.1281	0.1292	up
OsTN3g001742	166	152	120	56	77	80	155	61	0.396	-1.337	0.000461927045946146	0.00561449014636073	0.092	0.1214	down
OsTN3g001745	160	94	209	390	916	771	166	574	3.464	1.792	4.50523522258026e-05	0.000862282130990949	0.1277	0.148	up
OsTN3g001754	46	8	13	0	0	0	23	0	0.005	-7.517	1.99116112773618e-07	8.7971987574794e-06	0.5129	0.534	down
OsTN3g001763	33	30	24	3	21	8	31	8	0.283	-1.819	0.00197983787511964	0.017421751791561	0.1836	0.2053	down
OsTN3g001784	783	478	609	33	24	30	659	27	0.04	-4.644	2.28637364984974e-14	5.44799168453523e-12	0.189	0.1487	down
OsTN3g001786	89	105	84	21	19	21	99	18	0.182	-2.459	1.06086933370747e-09	8.75402955639467e-08	0.0836	0.1588	down
OsTN3g001792	18	7	8	48	48	77	11	50	4.328	2.114	0.000133213591781143	0.0021016611397593	0.1634	0.2036	up
OsTN3g001793	1	0	0	4	26	2	0	9	18.333	4.196	0.00204322618989319	0.0178022587547514	0.657	0.2571	up
OsTN3g001794	115	116	44	55	31	34	96	38	0.389	-1.362	0.00370991724228708	0.0282804510989152	0.1371	0.1536	down
OsTN3g001796	15	12	10	35	141	47	13	60	4.591	2.199	0.00316315862603891	0.0249464875352946	0.3333	0.1673	up
OsTN3g001803	0	0	2	13	12	9	1	10	12.2	3.609	0.00256626018947301	0.0211603239871483	0.5566	0.917	up
OsTN3g001816	36	28	17	0	12	9	29	5	0.199	-2.329	0.000545155927738891	0.00641571684770181	0.2349	0.2306	down
OsTN3g001824	234	101	54	45	39	35	133	36	0.271	-1.885	0.000264509825850173	0.00361900637213201	0.1668	0.1721	down
OsTN3g001825	41	21	25	64	152	158	31	103	3.364	1.75	2.35712517105986e-05	0.000510598095022129	0.0992	0.128	up
OsTN3g001826	0	0	0	4	0	7	0	3	27.443	4.778	0.00596734078278921	0.0406084596580183	0.7872	1.1206	up
OsTN3g001836	171	116	222	33	83	113	182	62	0.344	-1.54	3.62936665753345e-05	0.000723383258517968	0.0875	0.1169	down
OsTN3g001840	43	35	44	73	187	239	43	135	3.126	1.644	5.88573473523982e-06	0.00015799845130409	0.0774	0.1254	up
OsTN3g001847	14	3	16	48	57	242	12	95	8.006	3.001	3.66135636642597e-05	0.000728390098150052	0.298	0.196	up
OsTN3g001848	12	3	3	25	21	85	6	37	5.85	2.548	0.00587970718452759	0.040183999439986	0.4925	0.2148	up
OsTN3g001856	0	1	2	7	11	10	1	8	6.721	2.749	0.00525586000686822	0.0368813511486255	0.3369	0.5224	up
OsTN3g001874	69	56	62	5	0	0	66	2	0.028	-5.182	6.8658050603739e-06	0.000178873621517628	0.5822	0.1929	down
OsTN3g001897	1	0	1	0	75	10	1	21	25.403	4.667	0.000449096321129751	0.0054798536721511	0.7384	0.2574	up
OsTN3g001907	706	896	1157	7	22	101	997	34	0.034	-4.863	2.06607145824234e-10	2.26021145087272e-08	0.3	0.1869	down
OsTN3g001910	343	619	408	28	280	139	492	115	0.234	-2.094	0.000220784712476608	0.00311522381735956	0.2104	0.172	down
OsTN3g001977	1185	1203	944	553	514	552	1181	485	0.41	-1.285	0.00602565286815385	0.0408915265199804	0.1515	0.1891	down
OsTN3g001988	3	2	3	16	11	58	3	24	8.093	3.017	7.83649982034105e-05	0.00136555999745253	0.2507	0.2075	up
OsTN3g001990	64	57	45	548	545	712	59	532	9.04	3.176	3.40201375196403e-14	7.84201148238057e-12	0.101	0.1225	up
OsTN3g002010	105	56	88	117	329	393	88	226	2.581	1.368	0.000322926206833593	0.00421693107655172	0.0937	0.1168	up
OsTN3g002038	312	192	185	50	79	47	241	51	0.211	-2.242	1.89336507336612e-06	6.06062663488002e-05	0.1375	0.1162	down
OsTN3g002039	116	122	113	30	41	49	125	34	0.275	-1.861	5.42524211456747e-05	0.00101012387641468	0.13	0.1372	down
OsTN3g002041	30	57	64	22	21	7	55	15	0.28	-1.836	0.00166511044009764	0.0152667518820366	0.1988	0.1912	down
OsTN3g002051	4	8	7	15	74	45	7	35	5.183	2.374	4.00731865873338e-05	0.000784172957842224	0.1571	0.2045	up
OsTN3g002093	0	0	0	0	95	4	0	24	195.319	7.61	9.66667613396685e-05	0.00160911460575381	1.1655	0.2032	up
OsTN3g002121	155	98	80	55	24	19	116	33	0.275	-1.861	0.00191522061659773	0.0169657826299867	0.227	0.1308	down
OsTN3g002129	278	426	581	65	70	20	467	48	0.102	-3.293	1.60670027407523e-08	9.84777246020619e-07	0.1985	0.1526	down
OsTN3g002183	438	515	315	1216	2176	2252	449	1586	3.529	1.819	2.52071382237597e-05	0.000537215787062811	0.1251	0.1893	up
OsTN3g002184	7	5	8	24	38	28	7	26	3.585	1.842	0.000332930691600437	0.00433423031109298	0.1082	0.2259	up
OsTN3g002191	871	239	584	235	195	271	591	210	0.355	-1.496	0.00364591824788063	0.0279837091142977	0.1802	0.1629	down
OsTN3g002193	469	204	341	109	93	144	356	103	0.288	-1.797	0.000337689561025806	0.00438005047136041	0.1657	0.1233	down
OsTN3g002194	286	141	230	79	83	134	231	86	0.37	-1.435	0.000712758739687523	0.00789319822065446	0.118	0.1155	down
OsTN3g002204	273	141	139	651	1176	1829	192	1010	5.245	2.391	2.36059659050407e-06	7.29754692344311e-05	0.1647	0.1768	up
OsTN3g002229	198	116	118	35	123	61	151	60	0.395	-1.339	0.0016626929041355	0.0152511801115923	0.117	0.132	down
OsTN3g002253	123	35	45	170	335	389	70	248	3.552	1.829	3.87506167975101e-05	0.000760911417059998	0.1264	0.1172	up
OsTN3g002256	964	1130	1136	420	423	831	1157	481	0.416	-1.266	0.00608808583008444	0.0412623957170344	0.1475	0.1875	down
OsTN3g002260	50	20	44	105	181	122	40	117	2.895	1.534	0.00380458436145707	0.028877530620408	0.1794	0.1624	up
OsTN3g002261	10	10	0	405	366	926	7	485	68.927	6.107	6.95435323696544e-10	6.2003138755205e-08	0.4328	0.1229	up
OsTN3g002270	52	52	0	0	0	0	36	0	0.003	-8.163	1.65069325219338e-05	0.000380934979011768	1.1229	0.6045	down
OsTN3g002271	10	17	20	71	51	86	17	63	3.646	1.866	0.00032661522261942	0.0042624794006708	0.1515	0.1903	up
OsTN3g002274	0	43	34	4	9	3	29	5	0.163	-2.621	0.00159476970038358	0.014800998265223	0.3698	0.1994	down
OsTN3g002304	141	139	44	2	2	1	113	1	0.014	-6.165	5.43685712986294e-14	1.17652478727554e-11	0.2409	0.1974	down
OsTN3g002334	175	173	201	41	32	69	196	42	0.211	-2.242	7.11499388548922e-08	3.6446298388785e-06	0.1037	0.115	down
OsTN3g002340	0	259	0	0	0	0	94	0	0.001	-9.563	4.64711402608662e-05	0.00088261437679137	1.7623	0.2323	down
OsTN3g002343	6	9	2	7	35	60	6	27	4.409	2.14	0.00341233644432601	0.0264880742953228	0.283	0.2225	up
OsTN3g002347	8	1	0	2	7	130	3	35	11.456	3.518	0.00714432005909322	0.0466470429474107	0.9386	0.2025	up
OsTN3g002348	17	6	4	11	18	271	9	78	8.33	3.058	0.00647651405993978	0.04316112417483	0.7464	0.1572	up
OsTN3g002362	65	52	33	69	187	156	53	113	2.145	1.101	0.00344053477441686	0.0266387079083821	0.0873	0.1333	up
OsTN3g002378	0	0	2	5	10	20	1	9	11.596	3.536	0.000191610805972267	0.00279469763566291	0.2389	0.4621	up
OsTN3g002409	33	23	40	87	142	114	34	98	2.857	1.514	8.68801679800512e-05	0.00148346837548546	0.0856	0.1876	up
OsTN3g002420	759	690	739	158	299	290	779	209	0.269	-1.893	1.73566473527385e-07	7.80458831679677e-06	0.0863	0.1832	down
OsTN3g002431	88	111	71	344	318	561	96	357	3.713	1.893	0.000178890283644021	0.00264925017125612	0.1666	0.1217	up
OsTN3g002446	7	2	2	0	0	0	4	0	0.032	-4.968	0.00200391141540447	0.017570966172458	0.7059	1.0782	down
OsTN3g002452	30	30	19	3	7	1	28	3	0.117	-3.102	0.00115615973849455	0.0115125668798163	0.477	0.2711	down
OsTN3g002462	48	25	39	139	99	180	39	125	3.152	1.656	0.00237017009930226	0.0199665599114986	0.1893	0.16	up
OsTN3g002478	0	7	4	10	30	24	4	17	4.327	2.113	0.000867521938392317	0.00918957929444848	0.1573	0.228	up
OsTN3g002498	32	29	15	89	103	122	27	91	3.411	1.77	0.000395069962833722	0.00495461188753089	0.1498	0.1875	up
OsTN3g002504	14	11	0	0	0	0	9	0	0.014	-6.114	0.00476780658929832	0.0342284611845801	2.0047	1.9857	down
OsTN3g002524	204	142	128	86	133	63	166	82	0.494	-1.018	0.00256265817340719	0.0211464170752709	0.0724	0.1162	down
OsTN3g002545	32	21	23	2	4	1	27	2	0.079	-3.668	1.09790375440197e-09	8.95509419984718e-08	0.1071	0.2057	down
OsTN3g002564	85	74	29	307	309	419	65	304	4.623	2.209	1.09936386798527e-06	3.78477427733175e-05	0.1284	0.1156	up
OsTN3g002575	43	52	4	1	0	0	34	0	0.012	-6.337	1.08219225484344e-07	5.20409323094443e-06	0.4451	0.325	down
OsTN3g002589	41	39	29	109	125	243	39	136	3.509	1.811	8.76373217533575e-06	0.000220989855222765	0.0988	0.1559	up
OsTN3g002609	109	113	127	60	56	41	125	48	0.381	-1.394	0.0025543535068812	0.021102522329735	0.1358	0.1207	down
OsTN3g002611	229	199	91	49	110	85	181	68	0.376	-1.411	0.000223342893422725	0.00314087051778232	0.0933	0.1215	down
OsTN3g002620	90	102	0	0	0	0	66	0	0.002	-9.051	5.83997739313289e-07	2.17277895747665e-05	0.9366	0.3017	down
OsTN3g002622	774	1046	933	1945	2557	3647	988	2323	2.352	1.234	0.00402590890693697	0.0300942721851999	0.1281	0.1804	up
OsTN3g002632	547	469	446	132	144	229	518	146	0.281	-1.829	1.85187687814814e-06	5.96850348858473e-05	0.0963	0.1708	down
OsTN3g002661	6	3	32	34	124	102	15	70	4.605	2.203	0.000217750113932514	0.00308678253086017	0.2038	0.1634	up
OsTN3g002678	0	4	0	34	18	28	1	25	15.98	3.998	0.000491314875152078	0.00588994604711709	0.5994	0.3215	up
OsTN3g002702	34	22	21	98	141	145	27	110	4.05	2.018	1.51452782250906e-06	5.02638365132233e-05	0.0996	0.1759	up
OsTN3g002717	57	51	2	6	4	7	38	5	0.136	-2.874	0.00135473999014949	0.0130294652930159	0.4444	0.2504	down
OsTN3g002721	7	19	0	118	146	46	9	94	10.102	3.337	0.000285082620965331	0.00382884556226204	0.4758	0.1741	up
OsTN3g002723	14	28	16	7	7	1	21	5	0.223	-2.166	0.00555286448907268	0.0384975142909527	0.3158	0.2109	down
OsTN3g002734	6	16	4	0	0	1	9	0	0.043	-4.542	0.000654675716183892	0.00735915493244087	0.6318	0.5157	down
OsTN3g002747	0	0	0	0	81	7	0	21	174.405	7.446	3.40047832053459e-05	0.000690085586062939	0.9158	0.2228	up
OsTN3g002759	115	95	0	0	0	0	72	0	0.002	-9.166	3.71445300510254e-07	1.49757423724733e-05	0.9188	0.2793	down
OsTN3g002766	15	21	12	70	26	173	17	78	4.549	2.186	0.00237165862295775	0.0199665599114986	0.3155	0.1977	up
OsTN3g002768	224	240	222	85	155	174	244	116	0.474	-1.076	0.00396705815815566	0.0297656552186666	0.0928	0.118	down
OsTN3g002794	177	166	172	12	19	33	184	18	0.099	-3.343	2.86072079242194e-15	8.54469096406932e-13	0.0924	0.1161	down
OsTN3g002843	86	55	39	129	228	222	63	163	2.597	1.377	0.00073647333696251	0.0081008247183423	0.106	0.1368	up
OsTN3g002844	16	4	0	40	121	148	6	83	12.084	3.595	1.17698332969163e-06	4.02585249560812e-05	0.2817	0.2019	up
OsTN3g002848	151	250	175	8	3	15	207	8	0.037	-4.752	1.33340176620366e-20	1.17822713566171e-17	0.1139	0.1201	down
OsTN3g002862	76	31	48	10	36	8	54	15	0.277	-1.852	0.000786265591678771	0.00855971991926679	0.1758	0.1944	down
OsTN3g002863	229	270	374	72	47	77	315	60	0.188	-2.415	3.77067762663427e-10	3.77192266169967e-08	0.0896	0.1314	down
OsTN3g002876	0	0	0	0	9	25	0	9	70.75	6.145	0.000209490572780353	0.00299730361168267	0.7014	0.2404	up
OsTN3g002877	55	22	52	131	285	522	46	254	5.567	2.477	1.59107373953823e-07	7.2719613781007e-06	0.135	0.1155	up
OsTN3g002878	193	118	44	317	791	849	122	535	4.376	2.13	0.000149760333797886	0.00229809507876394	0.2056	0.1498	up
OsTN3g002879	389	307	204	801	1126	1147	315	884	2.804	1.487	0.00463173255521683	0.0335456736303135	0.1888	0.1886	up
OsTN3g002883	65	81	47	230	395	246	69	250	3.648	1.867	2.11489921475799e-05	0.000467681623017443	0.1226	0.1163	up
OsTN3g002891	41	42	51	131	210	285	48	176	3.659	1.872	1.01755462287e-05	0.000251506770247133	0.1105	0.1205	up
OsTN3g002909	205	226	134	100	77	102	200	84	0.42	-1.25	0.00185842212855472	0.0165803778208919	0.1055	0.1151	down
OsTN3g002919	2	0	3	27	18	22	2	21	10.807	3.434	4.65300548523012e-05	0.00088261437679137	0.2766	0.2065	up
OsTN3g002932	41	33	24	56	148	104	35	85	2.461	1.299	0.000792667820651591	0.00859102232626052	0.0867	0.1633	up
OsTN3g002940	26	27	16	154	172	152	24	142	5.774	2.53	9.5288291798242e-09	6.19870798823718e-07	0.1079	0.1706	up
OsTN3g002943	19	12	24	28	79	98	20	55	2.83	1.501	0.000709457258613266	0.00786896447877172	0.1065	0.2011	up
OsTN3g002970	32	26	21	51	141	110	28	83	2.964	1.568	0.00333665004052963	0.0260339725568476	0.1763	0.1774	up
OsTN3g002981	74	66	56	36	51	20	69	32	0.454	-1.139	0.00462016630157691	0.0334971561308518	0.0935	0.1721	down
OsTN3g002988	370	339	279	175	149	170	350	149	0.425	-1.233	0.00497153737728232	0.035368172502607	0.1307	0.1309	down
OsTN3g002990	2	11	31	0	1	0	17	0	0.024	-5.361	8.98126085636228e-06	0.000225670140972601	0.4639	0.2869	down
OsTN3g002995	3	0	0	0	11	739	1	191	169.14	7.402	7.58025757643037e-05	0.00132635744573728	1.3697	0.1433	up
OsTN3g003010	146	168	26	29	58	28	118	33	0.278	-1.849	0.00149042602694178	0.0140540083385302	0.215	0.1882	down
OsTN3g003017	30	44	0	0	2	0	26	0	0.025	-5.302	0.00213100776674907	0.0183864663755054	1.3568	0.7559	down
OsTN3g003018	220	71	166	0	39	1	160	10	0.063	-3.993	0.000500083857780611	0.00598492007446581	0.7286	0.1869	down
OsTN3g003019	980	342	798	0	32	7	745	9	0.013	-6.234	1.29792150100931e-07	6.07616363618201e-06	0.6277	0.1306	down
OsTN3g003027	40	35	33	7	19	0	38	7	0.196	-2.352	0.00550137192608399	0.0382477644163536	0.4207	0.2059	down
OsTN3g003032	6	4	10	32	60	70	7	45	6.205	2.633	0.000596491700353574	0.00687489102684688	0.323	0.2151	up
OsTN3g003065	2966	4700	5045	1698	3006	2783	4600	2114	0.46	-1.121	0.000789084951996373	0.00856874983027798	0.0782	0.1473	down
OsTN3g003072	19	16	3	1	2	4	13	2	0.156	-2.678	0.00581980805933841	0.0398645573366892	0.4577	0.553	down
OsTN3g003079	146	192	213	36	81	146	199	71	0.361	-1.471	0.00149970110199125	0.0141226293383341	0.1411	0.1186	down
OsTN3g003094	12	8	2	0	0	0	8	0	0.016	-5.944	0.00109114695481994	0.0110558783902849	1.1558	1.6049	down
OsTN3g003110	314	205	410	6	28	20	333	14	0.044	-4.502	1.21681176971337e-12	2.13263861159599e-10	0.2039	0.1541	down
OsTN3g003137	151	169	102	339	700	719	149	488	3.269	1.709	1.74879861253066e-05	0.000399440483958159	0.1043	0.1424	up
OsTN3g003138	60	90	65	798	204	899	77	595	7.718	2.948	1.26329660818162e-05	0.000303749786504621	0.2787	0.139	up
OsTN3g003159	43	28	27	51	115	104	34	75	2.171	1.119	0.00385109187060502	0.0291159020677079	0.0864	0.1691	up
OsTN3g003168	82	105	39	231	297	190	80	212	2.66	1.411	0.000857088954340964	0.00910635543823088	0.1166	0.1175	up
OsTN3g003169	530	687	271	1941	1545	1119	525	1432	2.727	1.447	0.00395915794253498	0.0297420696023165	0.1735	0.1893	up
OsTN3g003171	130	106	69	192	520	460	107	320	2.991	1.581	0.00091490884013079	0.00962901824945592	0.151	0.1523	up
OsTN3g003172	10	6	12	46	55	44	10	43	4.238	2.083	0.000654382306984202	0.00735915493244087	0.2019	0.2063	up
OsTN3g003178	100	72	104	22	41	51	98	32	0.326	-1.618	9.0312502553422e-06	0.000226389744875936	0.075	0.1407	down
OsTN3g003181	10	49	33	165	222	208	34	173	5.125	2.357	1.78825409840426e-06	5.7987010190916e-05	0.1454	0.1203	up
OsTN3g003182	17	12	29	57	70	118	21	70	3.325	1.734	0.00304502641809851	0.0241975860678144	0.2076	0.1948	up
OsTN3g003183	67	59	64	107	209	314	68	173	2.567	1.36	0.000761295209438708	0.00833924974512742	0.1045	0.12	up
OsTN3g003190	26	11	4	40	63	82	14	52	3.673	1.877	0.000378843909351239	0.00479493555538924	0.1535	0.2044	up
OsTN3g003194	3	4	0	4	36	35	2	19	7.615	2.929	0.00114446153325363	0.0114322165500281	0.3809	0.2229	up
OsTN3g003196	167	169	213	73	135	102	197	88	0.447	-1.162	0.000179261549139299	0.0026513775155624	0.0604	0.1177	down
OsTN3g003212	109	158	109	22	33	18	134	21	0.158	-2.662	2.78729154858273e-11	3.81355431424477e-09	0.0849	0.1335	down
OsTN3g003239	222	234	36	18	104	30	170	40	0.237	-2.076	0.00104890966261575	0.0107408146861865	0.2574	0.1623	down
OsTN3g003246	356	652	268	39	357	172	455	146	0.323	-1.633	0.00775791908706522	0.049510138453022	0.2546	0.1784	down
OsTN3g003248	6	3	5	16	17	48	5	23	4.511	2.174	0.00232703202799946	0.0196924853223402	0.2506	0.2804	up
OsTN3g003261	52	40	72	178	765	252	59	321	5.448	2.446	0.0030367940322826	0.0241474657077679	0.4343	0.1892	up
OsTN3g003262	9	4	0	23	174	56	4	66	14.506	3.859	0.00015351158789406	0.00234886020524482	0.5429	0.1165	up
OsTN3g003266	6	6	10	226	76	151	8	147	18.24	4.189	1.13523090485947e-11	1.68355537058425e-09	0.1803	0.1491	up
OsTN3g003273	61	52	44	107	183	158	56	127	2.291	1.196	0.000709288615163997	0.00786896447877172	0.0757	0.1514	up
OsTN3g003292	7	3	8	17	76	119	6	56	8.594	3.103	2.89010702903024e-06	8.56012566545311e-05	0.2193	0.2023	up
OsTN3g003328	164	145	150	334	416	528	163	368	2.257	1.174	0.00236217557027477	0.0199262757831413	0.1006	0.1332	up
OsTN3g003332	46	44	37	57	107	222	45	105	2.341	1.227	0.00621480771001185	0.0418995330282552	0.1268	0.1379	up
OsTN3g003353	19	10	5	13	100	64	12	46	3.891	1.96	0.00499080743483674	0.0354081666547455	0.2884	0.1907	up
OsTN3g003366	0	0	0	0	59	16	0	18	149.48	7.224	0.000275814885921188	0.00373751200366175	1.2572	0.204	up
OsTN3g003388	11	12	8	20	53	117	11	51	4.597	2.201	0.000390296709337745	0.00490054607159595	0.2141	0.1971	up
OsTN3g003396	1	0	1	6	10	9	1	7	8.686	3.119	0.00614158182452203	0.0415609913656031	0.4616	0.5993	up
OsTN3g003419	474	347	340	597	1611	2456	409	1254	3.066	1.616	0.000104682721602541	0.00172093525350782	0.1177	0.1865	up
OsTN3g003420	65	63	37	7	10	15	58	9	0.158	-2.664	1.4824478082022e-06	4.95242880075097e-05	0.1579	0.1716	down
OsTN3g003421	167	374	387	23	35	15	338	21	0.063	-3.978	9.95257180769806e-10	8.24469493460362e-08	0.2291	0.1598	down
OsTN3g003452	35	38	5	155	149	165	27	140	5.127	2.358	5.42282341236718e-05	0.00101012387641468	0.2067	0.1721	up
OsTN3g003453	175	153	149	347	546	838	169	484	2.861	1.517	4.33640510505305e-05	0.000833745630669629	0.0914	0.1487	up
OsTN3g003481	38	32	18	0	15	0	31	4	0.13	-2.945	0.000452478874671784	0.00551161372496527	0.3725	0.274	down
OsTN3g003483	300	62	36	1	49	11	133	15	0.117	-3.099	0.000292256599252469	0.00391033798129156	0.4337	0.1986	down
OsTN3g003487	102	184	120	287	417	541	146	353	2.422	1.276	0.000546564917801334	0.00642612480434716	0.0908	0.1247	up
OsTN3g003494	237	108	183	800	1099	1910	186	1071	5.765	2.527	3.07829086312162e-06	8.99191657496146e-05	0.1867	0.1877	up
OsTN3g003495	270	128	125	733	1529	2459	181	1289	7.098	2.827	3.20594369630383e-10	3.28446608538721e-08	0.1249	0.1886	up
OsTN3g003514	442	633	370	1299	1267	1331	514	1163	2.259	1.175	0.00453015998567926	0.0330254736391544	0.119	0.1892	up
OsTN3g003529	88	233	106	27	36	40	154	30	0.193	-2.372	6.39426580683955e-06	0.000168451173870368	0.1668	0.1467	down
OsTN3g003553	356	315	563	96	197	194	445	135	0.305	-1.713	8.20525477101377e-05	0.00141701008085415	0.1254	0.1643	down
OsTN3g003560	40	38	20	40	149	152	35	91	2.645	1.403	0.00238264470220929	0.0200351888183	0.1311	0.1538	up
OsTN3g003562	3	0	0	9	17	14	1	11	9.859	3.301	0.00115072179900648	0.0114731345517303	0.3911	0.6554	up
OsTN3g003570	137	71	66	44	49	27	95	36	0.377	-1.409	0.00162490699903321	0.0149888659106122	0.1226	0.1492	down
OsTN3g003586	87	203	239	16	23	32	194	20	0.105	-3.256	6.02784038227739e-10	5.55793091247638e-08	0.1533	0.1152	down
OsTN3g003605	94	153	154	376	464	442	145	375	2.584	1.37	0.00107107806095543	0.0109151140983574	0.1175	0.1464	up
OsTN3g003612	22	21	29	54	70	109	26	66	2.563	1.358	0.00295295592725396	0.0235869440110262	0.1215	0.1974	up
OsTN3g003613	49	39	46	508	777	899	48	620	12.99	3.699	1.62647935493004e-10	1.83472062127666e-08	0.1885	0.1223	up
OsTN3g003615	15	20	14	45	488	252	17	201	11.459	3.518	2.92665675862126e-08	1.67744891567787e-06	0.2207	0.1175	up
OsTN3g003621	5	10	5	24	54	52	7	36	4.969	2.313	0.00200578223128166	0.0175771172639628	0.3087	0.2097	up
OsTN3g003622	36	76	35	898	1614	2695	53	1435	27.19	4.765	4.04103761900612e-07	1.59884859675864e-05	0.4607	0.1809	up
OsTN3g003629	10	4	2	64	131	330	5	141	24.901	4.638	7.31250357087594e-16	2.46152798773915e-13	0.1399	0.1287	up
OsTN3g003630	22	13	12	446	420	699	16	457	27.582	4.786	1.07073370116847e-09	8.80118201576737e-08	0.3102	0.1601	up
OsTN3g003631	7	2	10	130	179	253	7	160	23.107	4.53	1.07111938529779e-07	5.17431180045789e-06	0.3586	0.1162	up
OsTN3g003667	32	32	26	8	13	11	32	9	0.288	-1.794	0.000220456630204355	0.0031126656170065	0.1086	0.2196	down
OsTN3g003673	65	61	102	11	12	19	82	12	0.148	-2.754	1.03652281831629e-06	3.59175480523423e-05	0.1732	0.1179	down
OsTN3g003677	4	0	0	1	28	30	1	15	10.214	3.352	0.000855093013549098	0.00908970302673469	0.431	0.2253	up
OsTN3g003694	0	2	0	1	26	5	1	8	9.94	3.313	0.00340090816864435	0.0264187031254362	0.4644	0.3188	up
OsTN3g003707	239	247	322	9	47	42	290	26	0.09	-3.467	1.27041405768405e-10	1.45304046497899e-08	0.1631	0.1292	down
OsTN3g003720	0	0	3	10	60	49	1	31	26.273	4.716	1.66502473561188e-09	1.33245960634419e-07	0.1795	0.2033	up
OsTN3g003730	87	107	84	51	19	55	99	39	0.387	-1.371	0.00177941205964257	0.0160564778293976	0.1182	0.1545	down
OsTN3g003746	251	198	197	67	69	35	228	52	0.227	-2.139	6.48465169771823e-07	2.37923890230987e-05	0.1138	0.1167	down
OsTN3g003747	3813	3183	3074	695	322	225	3564	412	0.115	-3.117	5.66655287081502e-08	2.98190041517057e-06	0.2011	0.1743	down
OsTN3g003753	6	4	2	18	42	50	4	30	7.014	2.81	2.13981389115707e-06	6.72281973181749e-05	0.14	0.207	up
OsTN3g003757	55	43	29	115	260	281	44	181	4.048	2.017	7.08508840533778e-06	0.00018390877577968	0.1239	0.132	up
OsTN3g003758	2	13	0	22	40	23	5	24	4.454	2.155	0.00206314067396694	0.0179168813565998	0.2423	0.2287	up
OsTN3g003764	1	0	0	9	13	14	0	10	21.929	4.455	9.83612105616669e-05	0.00163219576868644	0.3562	0.8694	up
OsTN3g003765	20	12	4	44	106	255	12	108	8.631	3.11	4.62998307988293e-07	1.77234749413497e-05	0.207	0.1242	up
OsTN3g003825	1548	1189	2873	484	1189	886	2032	707	0.348	-1.522	0.00245889552473944	0.0204573548031186	0.1735	0.1723	down
OsTN3g003852	3211	2555	2190	797	417	346	2803	506	0.18	-2.472	3.65874283986099e-06	0.000103870092911556	0.1834	0.1781	down
OsTN3g003862	81	132	64	289	382	368	99	301	3.051	1.609	0.0026619354565296	0.0217540135748066	0.1912	0.1204	up
OsTN3g003867	101	71	36	26	31	21	72	23	0.32	-1.644	0.00558459358120186	0.0386655161856179	0.219	0.201	down
OsTN3g003875	78	40	27	128	163	233	50	150	2.977	1.574	0.000276529225442959	0.00374205766828595	0.1176	0.1376	up
OsTN3g003880	185	178	158	9	44	91	185	37	0.206	-2.281	1.33496930487311e-05	0.000317722858620552	0.1703	0.1259	down
OsTN3g003888	0	0	0	0	17	1	0	4	37.044	5.211	0.00574643658777965	0.0395151364192747	1.1788	0.2751	up
OsTN3g003890	64	33	27	184	320	225	43	208	4.816	2.268	1.34063339323227e-07	6.24853019126962e-06	0.111	0.1219	up
OsTN3g003908	0	0	0	6	6	1	0	4	32.58	5.026	0.00130856281356814	0.0126657652155818	0.4437	0.7316	up
OsTN3g003926	38	38	41	18	5	2	42	9	0.2	-2.322	0.000383400168482426	0.00483398773662712	0.2284	0.2024	down
OsTN3g003927	27	0	22	2	2	1	17	1	0.092	-3.435	0.00113571954728128	0.0113819088250892	0.5174	0.324	down
OsTN3g003950	4	1	0	7	16	21	2	12	6.606	2.724	0.0016902941728654	0.0154176638812716	0.2947	0.7057	up
OsTN3g003978	30	43	17	6	10	3	32	5	0.177	-2.5	0.00499034510903891	0.0354081666547455	0.451	0.2735	down
OsTN3g003994	0	0	0	0	43	4	0	11	93.943	6.554	0.000608142956359641	0.00698261379291766	1.1601	0.2125	up
OsTN3g003997	152	123	101	282	289	433	133	293	2.204	1.14	0.00114087620354247	0.011412529079493	0.0813	0.1198	up
OsTN3g004000	0	1	0	6	2	64	0	19	40.177	5.328	0.000177896297021713	0.00263637090911213	0.7372	0.2791	up
OsTN3g004007	104	77	53	105	231	275	82	168	2.052	1.037	0.00547285016871692	0.0380908216370134	0.0901	0.1207	up
OsTN3g004013	818	1034	835	322	340	195	960	260	0.271	-1.885	0.000117115483535701	0.00189737819659404	0.1596	0.1893	down
OsTN3g004015	95	92	92	19	42	27	100	25	0.25	-1.999	1.8976074341304e-06	6.06062663488002e-05	0.1	0.1407	down
OsTN3g004032	78	43	20	188	258	334	48	223	4.565	2.191	3.59350577645061e-06	0.000102705494610766	0.1382	0.1179	up
OsTN3g004035	53	153	74	16	46	15	101	21	0.213	-2.231	0.00139449795006058	0.0133405185856479	0.3031	0.1326	down
OsTN3g004037	56	37	34	12	34	11	44	16	0.36	-1.475	0.00125546718131266	0.0122383989543008	0.1116	0.1994	down
OsTN3g004038	1410	1403	1826	24	161	209	1665	102	0.061	-4.023	9.77249098167559e-08	4.77104609557438e-06	0.3194	0.1856	down
OsTN3g004045	397	202	195	82	162	153	276	111	0.402	-1.313	0.000929711870919034	0.00976059388444552	0.1045	0.117	down
OsTN3g004053	79	91	47	8	40	3	77	14	0.181	-2.464	0.00433585576966718	0.0318445354078684	0.459	0.2037	down
OsTN3g004063	16	8	4	29	136	212	10	99	10.09	3.335	1.03939187259313e-06	3.59582111616355e-05	0.2492	0.1389	up
OsTN3g004071	591	585	715	327	302	302	677	280	0.413	-1.275	0.00272725190237341	0.0221342637174255	0.1242	0.1805	down
OsTN3g004091	322	292	345	82	94	91	342	79	0.229	-2.127	1.33542367358495e-08	8.40365870792759e-07	0.0873	0.1286	down
OsTN3g004092	47	55	65	21	34	25	60	23	0.383	-1.383	0.00202503414018232	0.0177019369376943	0.115	0.2011	down
OsTN3g004098	19	9	8	41	198	278	12	135	10.722	3.422	9.45887599445022e-08	4.66498565614664e-06	0.2213	0.1343	up
OsTN3g004100	25	24	18	51	109	95	24	71	2.991	1.581	0.000160501046743649	0.00242777867210597	0.0969	0.192	up
OsTN3g004108	428	317	159	40	98	58	314	55	0.174	-2.521	6.03797715529615e-07	2.22304481827023e-05	0.1578	0.1177	down
OsTN3g004125	36	41	34	93	110	164	40	105	2.661	1.412	0.000589281984393393	0.00681401474538205	0.1018	0.1473	up
OsTN3g004135	45	28	39	165	253	319	40	209	5.244	2.391	2.93975343007585e-08	1.68041377335899e-06	0.1099	0.1267	up
OsTN3g004149	12	9	7	32	129	58	10	59	5.932	2.569	0.0066461140183688	0.0440037901928028	0.5379	0.1171	up
OsTN3g004179	75	39	51	129	258	101	58	140	2.407	1.267	0.00436191292008593	0.0320079886838278	0.1272	0.146	up
OsTN3g004180	15	13	2	14	112	78	10	53	5.045	2.335	0.00447668786724006	0.0326805919451153	0.403	0.2033	up
OsTN3g004188	106	85	102	10	46	49	104	28	0.27	-1.887	0.000204909799585674	0.00294811541371329	0.1588	0.1417	down
OsTN3g004198	520	479	369	1127	1470	1305	483	1137	2.353	1.234	0.00126456813367047	0.0123129919241275	0.1012	0.1863	up
OsTN3g004209	32	3	10	0	1	1	15	1	0.044	-4.518	0.000398508065736771	0.00498887871905531	0.6714	0.2508	down
OsTN3g004230	194	131	165	52	93	121	173	74	0.429	-1.221	0.000741134972053561	0.00814365251416574	0.0837	0.1169	down
OsTN3g004236	1965	2007	1755	559	908	996	2036	696	0.342	-1.547	2.00086249768583e-05	0.000448106899945049	0.0899	0.179	down
OsTN3g004239	0	0	0	0	5	12	0	4	36.444	5.188	0.00142646765920493	0.0135898920254982	0.5974	0.846	up
OsTN3g004246	1	2	4	1	140	41	3	45	17.016	4.089	8.14723578397647e-05	0.00141158847443455	0.5171	0.1603	up
OsTN3g004255	43	89	34	77	197	312	59	158	2.669	1.416	0.00162683740541378	0.0150001481985261	0.1301	0.1161	up
OsTN3g004259	144	97	88	66	60	42	115	52	0.44	-1.183	0.00183734842205041	0.0164526778250332	0.0887	0.1264	down
OsTN4g000044	183	80	39	38	28	39	103	32	0.306	-1.707	0.00122554346673637	0.0120380270028152	0.1741	0.1741	down
OsTN4g000053	320	5054	168	1	344	0	2010	84	0.042	-4.573	0.00470272147054381	0.0339219776278308	1.4001	0.1753	down
OsTN4g000060	0	0	1	23	60	57	0	38	79.89	6.32	1.0993198668344e-10	1.30552733512323e-08	0.2399	0.214	up
OsTN4g000073	39	23	7	121	134	52	24	94	3.932	1.975	0.00342797531168844	0.026560859493963	0.2854	0.1946	up
OsTN4g000125	0	1	0	0	19	20	0	10	20.616	4.366	0.00666397288215694	0.0440945001285186	1.0916	0.203	up
OsTN4g000140	20	63	11	0	1	2	34	1	0.028	-5.141	5.16541926456689e-08	2.76623854403207e-06	0.3188	0.3012	down
OsTN4g000151	19	17	31	114	83	360	24	157	6.476	2.695	0.00416006435855094	0.0308974885934356	0.5467	0.1972	up
OsTN4g000190	0	0	0	0	28	0	0	7	56.598	5.823	0.00168883999759224	0.015411028325705	1.0769	0.4566	up
OsTN4g000202	1	0	0	6	11	45	0	16	35.464	5.148	0.000112388533044211	0.00183058649790213	0.6153	0.2036	up
OsTN4g000212	162	16	18	0	0	0	65	0	0.002	-9.023	3.29348538942653e-06	9.51566003454611e-05	1.1254	0.2015	down
OsTN4g000231	2	8	14	0	0	0	9	0	0.014	-6.166	4.12427190662588e-05	0.000800947200767537	0.5641	1.0649	down
OsTN4g000250	5	2	0	0	87	21	2	27	10.679	3.417	0.00276861605745848	0.0223757777174246	0.6771	0.2244	up
OsTN4g000270	0	0	6	12	25	20	2	16	7.012	2.81	0.000118476583157324	0.00191067140609687	0.184	0.3012	up
OsTN4g000280	0	0	0	0	19	31	0	13	102.646	6.682	3.83031594306371e-05	0.000752822152034774	0.6586	0.5297	up
OsTN4g000326	5	11	8	1	2	0	9	1	0.112	-3.155	0.00053488049734818	0.00631933744137207	0.2501	0.6125	down
OsTN4g000335	463	407	402	174	136	78	451	122	0.269	-1.895	8.57920051656948e-06	0.000217630508797714	0.1181	0.1421	down
OsTN4g000336	98	95	56	39	48	26	88	34	0.383	-1.386	0.00243395346537276	0.0203215949370709	0.1281	0.1647	down
OsTN4g000340	69	127	19	12	24	32	76	19	0.25	-2	0.00159732952342889	0.0148161818540461	0.2465	0.1883	down
OsTN4g000344	21	53	16	1	7	4	32	3	0.106	-3.243	3.61260584391866e-06	0.000102835613599977	0.2212	0.2401	down
OsTN4g000357	102	4	23	0	0	0	43	0	0.003	-8.436	5.9996595828612e-08	3.12616168977242e-06	0.6347	0.2783	down
OsTN4g000358	66	17	15	0	0	0	33	0	0.004	-8.061	1.27831414983667e-08	8.0720051843072e-07	0.4824	0.419	down
OsTN4g000361	90	8	14	0	0	0	37	0	0.003	-8.226	4.72853228485762e-07	1.80356086627654e-05	0.7348	0.3427	down
OsTN4g000368	23	13	7	1	0	0	15	0	0.029	-5.109	0.000184858909816172	0.00271546855629089	0.6773	0.6405	down
OsTN4g000387	298	136	78	58	84	60	175	59	0.334	-1.584	3.98683260588847e-05	0.000782134681527074	0.0931	0.1264	down
OsTN4g000433	0	0	13	68	41	60	5	52	10.497	3.392	7.00456274534647e-05	0.00124295521485751	0.3724	0.2012	up
OsTN4g000444	87	75	39	9	18	14	70	12	0.166	-2.591	3.16464579410929e-07	1.29811689275968e-05	0.1344	0.1988	down
OsTN4g000445	10	18	6	4	1	4	12	3	0.227	-2.139	0.00147562177264824	0.0139329968533176	0.1534	0.2014	down
OsTN4g000456	0	0	0	0	6	30	0	9	75.037	6.23	0.000187572212399376	0.00274712977096241	0.7203	0.6699	up
OsTN4g000476	4	9	4	27	34	50	6	32	5.136	2.361	0.00084042410128361	0.00896833388405029	0.2581	0.3361	up
OsTN4g000498	73	19	27	354	395	447	41	351	8.544	3.095	3.73342285729547e-07	1.5023661961037e-05	0.2194	0.1162	up
OsTN4g000499	95	16	53	644	399	531	57	488	8.571	3.099	2.19660733673621e-06	6.87071560326913e-05	0.257	0.1256	up
OsTN4g000502	0	0	0	0	15	3	0	4	37.221	5.218	0.00532825088782342	0.0373034299292319	1.1424	1.2472	up
OsTN4g000505	265	189	169	85	127	108	219	92	0.421	-1.249	0.00172036754823179	0.015651150612187	0.1045	0.1155	down
OsTN4g000564	2	11	7	0	1	2	7	1	0.128	-2.962	0.00525880652899947	0.0368813511486255	0.4314	0.881	down
OsTN4g000588	38	30	21	7	8	4	31	6	0.181	-2.469	1.07593257023185e-05	0.000263479238070518	0.1384	0.2225	down
OsTN4g000589	370	162	368	128	59	8	319	67	0.209	-2.259	0.000520809214826063	0.0061945042169469	0.2716	0.1182	down
OsTN4g000617	169	338	287	292	1245	1306	288	752	2.616	1.387	0.00214061657512565	0.0184461827341283	0.1397	0.188	up
OsTN4g000620	554	687	461	1256	1921	2148	605	1513	2.5	1.322	0.00229256068165317	0.0194941196374574	0.1299	0.189	up
OsTN4g000629	154	97	155	315	522	627	144	412	2.853	1.513	0.00130003707615048	0.012604940276937	0.1486	0.1413	up
OsTN4g000743	11	12	10	25	83	86	12	52	4.438	2.15	1.25277269617161e-05	0.000301561300428051	0.1217	0.2029	up
OsTN4g000746	5	15	4	32	35	38	9	31	3.548	1.827	0.00204707094791653	0.0178284326868443	0.1786	0.2148	up
OsTN4g000790	13	10	6	23	57	65	10	40	3.87	1.952	0.00212939508740045	0.0183864663755054	0.2249	0.2038	up
OsTN4g000804	37	83	48	19	24	14	61	17	0.278	-1.846	0.000380159974022728	0.00480456052985697	0.1539	0.2037	down
OsTN4g000870	24	22	12	47	76	53	20	51	2.468	1.303	0.00418201401765253	0.0310094321087038	0.1144	0.1933	up
OsTN4g000878	7	13	0	0	0	0	7	0	0.018	-5.832	0.00757586636821759	0.0485675326695256	2.1322	2.1781	down
OsTN4g000885	0	0	0	9	18	11	0	11	87.132	6.445	3.81030319367162e-07	1.52175329243303e-05	0.2157	0.3706	up
OsTN4g000911	13	0	8	40	26	40	7	33	4.346	2.12	0.00389012425843703	0.0292961168851826	0.2972	0.2113	up
OsTN4g000937	43	27	31	72	129	113	36	89	2.489	1.315	0.000386040488618877	0.00485861165705669	0.0783	0.1574	up
OsTN4g000938	111	66	46	37	29	41	77	32	0.411	-1.284	0.00256054477543784	0.0211372024339082	0.1078	0.1743	down
OsTN4g000946	8	6	20	30	97	136	13	70	5.662	2.501	0.000213560037302932	0.00304161699871275	0.2614	0.1908	up
OsTN4g000994	2	0	0	7	7	42	1	15	18.893	4.24	0.000281066698090743	0.00379171849008294	0.5202	0.2926	up
OsTN4g000996	154	80	86	240	412	516	112	327	2.924	1.548	0.000159271336489074	0.00241780045305927	0.1106	0.1189	up
OsTN4g001008	952	1422	238	52	187	93	916	90	0.098	-3.346	0.000212635284904244	0.00303251949358729	0.4875	0.1407	down
OsTN4g001009	19	0	5	0	0	0	8	0	0.015	-6.031	0.00654149019385148	0.0434603328762558	2.1788	1.9193	down
OsTN4g001047	7	16	7	37	48	42	11	37	3.416	1.772	0.00153783574099102	0.0143986236464444	0.1641	0.211	up
OsTN4g001062	0	0	0	0	15	6	0	5	43.293	5.436	0.00426752278697121	0.0314349967847511	1.2045	0.96	up
OsTN4g001070	0	2	0	97	75	128	1	90	106.572	6.736	6.1176756917365e-13	1.12815259473614e-10	0.2659	0.2009	up
OsTN4g001071	15	14	15	3	8	1	15	4	0.223	-2.163	0.00188978677723054	0.0167755161928539	0.2089	0.3663	down
OsTN4g001075	0	0	0	0	60	0	0	15	119.369	6.899	6.32463002550249e-05	0.00114242240785589	0.8152	0.1914	up
OsTN4g001078	0	0	0	0	0	78	0	20	160.403	7.326	0.000819546267514047	0.00880181363512815	1.6615	0.1998	up
OsTN4g001086	8	2	8	11	43	66	6	31	4.927	2.301	0.00221530525098295	0.0189588290789328	0.3064	0.2181	up
OsTN4g001099	14	15	29	5	12	10	21	8	0.366	-1.451	0.00475170794564493	0.0341591425095905	0.1133	0.2058	down
OsTN4g001104	14	18	6	3	2	0	14	2	0.124	-3.017	0.00574871865069761	0.0395180150487339	0.5725	0.9702	down
OsTN4g001105	302	282	120	3	40	13	246	14	0.06	-4.062	2.23279014340592e-09	1.703265488173e-07	0.2458	0.1398	down
OsTN4g001111	15	0	2	0	1	0	5	0	0.069	-3.86	0.00762040812976546	0.0488088176405727	0.8244	1.2973	down
OsTN4g001122	12	10	20	1	2	7	15	2	0.19	-2.399	0.00316489602478028	0.0249509107797455	0.3107	0.5144	down
OsTN4g001128	0	0	0	0	17	0	0	4	35.1	5.133	0.00507377444620411	0.0358904385192297	1.0445	0.8967	up
OsTN4g001133	19	0	18	23	104	98	13	59	4.549	2.186	0.00064083505874305	0.0072481008484074	0.2371	0.1803	up
OsTN4g001172	0	0	3	8	25	9	1	12	9.659	3.272	0.00147469662233808	0.0139321322175276	0.4095	0.5656	up
OsTN4g001204	9	1	0	0	0	0	3	0	0.036	-4.788	0.00491695547843469	0.0350736208648384	0.9323	0.9835	down
OsTN4g001224	89	37	89	283	285	370	76	276	3.613	1.853	4.36692193046428e-05	0.000838852476262283	0.132	0.1152	up
OsTN4g001228	9	4	7	21	29	49	7	28	3.905	1.965	0.00242726506187917	0.0202817218941181	0.2154	0.2145	up
OsTN4g001244	0	0	0	0	21	55	0	19	155.365	7.28	9.62062613683178e-06	0.000239746907736535	0.6942	0.2057	up
OsTN4g001248	2	0	5	4	89	316	3	104	39.25	5.295	2.06379401831376e-06	6.52263483552605e-05	0.5579	0.1153	up
OsTN4g001253	2	0	6	5	35	22	3	16	5.505	2.461	0.00125575310626485	0.0122383989543008	0.2469	0.2035	up
OsTN4g001294	1018	2182	1858	434	552	769	1835	502	0.274	-1.868	0.00025606295351717	0.00351250132939109	0.1754	0.187	down
OsTN4g001333	27	26	25	12	7	7	28	8	0.286	-1.807	0.000894787078295707	0.00943128706233452	0.1393	0.2271	down
OsTN4g001335	43	33	21	4	16	14	34	9	0.277	-1.853	0.000471873083835828	0.00570625162794996	0.1427	0.2088	down
OsTN4g001343	15	4	0	0	0	0	6	0	0.019	-5.691	0.00256633910005873	0.0211603239871483	1.3384	1.4964	down
OsTN4g001354	508	241	237	53	149	33	342	66	0.193	-2.377	6.11674325388377e-05	0.0011144138675697	0.2233	0.115	down
OsTN4g001362	360	601	533	257	96	238	539	186	0.344	-1.539	0.0028961168965404	0.0232379686057254	0.1808	0.166	down
OsTN4g001399	25	13	14	25	110	101	18	62	3.433	1.779	0.000964868094342917	0.010069861061383	0.1695	0.1957	up
OsTN4g001431	46	27	15	4	7	2	30	4	0.126	-2.983	6.68675619877358e-05	0.00119452590904492	0.2709	0.2509	down
OsTN4g001446	58	52	25	11	22	11	47	12	0.267	-1.907	0.000734015949034256	0.00808420744438018	0.1792	0.2027	down
OsTN4g001457	38	29	24	72	73	127	32	79	2.444	1.289	0.00119258008480872	0.0117825659648298	0.0909	0.1802	up
OsTN4g001463	6	19	33	132	108	185	22	126	5.86	2.551	3.46743026811919e-05	0.000699655506146561	0.2242	0.1826	up
OsTN4g001484	33	34	24	2	11	3	32	4	0.139	-2.846	0.00013607506562147	0.0021360058598331	0.2831	0.216	down
OsTN4g001493	56	46	22	158	224	291	43	191	4.406	2.139	1.53147709939026e-06	5.06681744092708e-05	0.1204	0.1294	up
OsTN4g001506	634	316	253	47	85	43	416	50	0.121	-3.048	5.96251203226583e-12	9.29757299031335e-10	0.1147	0.1266	down
OsTN4g001508	25	15	27	58	75	134	24	75	3.156	1.658	0.00022388596366682	0.00314642122695974	0.115	0.1659	up
OsTN4g001513	541	408	361	69	346	179	461	157	0.342	-1.547	0.000448899666311501	0.0054798536721511	0.1306	0.1426	down
OsTN4g001515	40	3	4	57	60	269	16	106	6.725	2.75	0.00248787259708772	0.0206741042971941	0.5012	0.1523	up
OsTN4g001547	2	0	2	83	62	66	1	65	42.018	5.393	6.84346999119024e-10	6.14955373318523e-08	0.2789	0.2076	up
OsTN4g001550	3	6	5	7	16	51	5	20	3.905	1.965	0.0029326651287286	0.0234602147811948	0.2012	0.2132	up
OsTN4g001575	13	15	15	17	153	491	15	169	10.932	3.45	1.5315812658309e-05	0.00035810632750249	0.3593	0.1164	up
OsTN4g001592	15	7	13	70	35	27	12	43	3.423	1.775	0.00490982098348529	0.0350581055881389	0.2279	0.2017	up
OsTN4g001605	29	6	30	0	5	2	23	2	0.086	-3.539	0.000294424058191116	0.003934373662293	0.4576	0.2369	down
OsTN4g001606	1772	773	5920	174	341	908	3120	383	0.123	-3.024	2.29224899084124e-06	7.11738277434408e-05	0.2522	0.1715	down
OsTN4g001622	272	504	0	0	0	0	271	0	0	-11.084	3.72269729046407e-09	2.69444510030278e-07	0.9082	0.1898	down
OsTN4g001623	508	890	0	0	0	0	488	0	0	-11.931	7.7664683603609e-10	6.75014321795793e-08	0.9316	0.1406	down
OsTN4g001624	118	219	0	1	0	0	118	0	0.004	-8.059	1.77706015049939e-06	5.77122735247176e-05	0.9695	0.2119	down
OsTN4g001629	14	6	9	34	91	200	10	86	8.44	3.077	3.73175801177917e-05	0.000739511525539005	0.3103	0.1967	up
OsTN4g001649	0	3	5	9	41	20	3	19	6.279	2.651	0.00029046918249783	0.00389133288264781	0.2185	0.2477	up
OsTN4g001651	111	63	64	177	257	348	83	222	2.655	1.409	8.08727521549785e-05	0.00140349300732457	0.0814	0.1154	up
OsTN4g001656	14	10	8	55	107	57	11	63	5.488	2.456	4.63108252070019e-06	0.000128213272867479	0.1496	0.2018	up
OsTN4g001680	289	370	379	32	114	143	373	77	0.208	-2.266	1.21531947671012e-07	5.74015147941906e-06	0.1155	0.1317	down
OsTN4g001682	12	13	38	1	10	7	23	4	0.213	-2.23	0.00347023345048222	0.0268294716676546	0.3096	0.2056	down
OsTN4g001685	18	13	13	43	79	41	15	47	2.988	1.579	0.00112730195788823	0.0113279337292244	0.1257	0.2025	up
OsTN4g001702	113	101	97	316	455	523	110	369	3.345	1.742	0.000144168455845403	0.00223656213834196	0.1381	0.1219	up
OsTN4g001703	169	150	137	299	380	563	161	355	2.194	1.133	0.00523501538475195	0.036797802871871	0.1117	0.1257	up
OsTN4g001705	6	4	8	40	23	41	6	32	4.855	2.279	0.0020376521888491	0.0177609905338771	0.2918	0.2278	up
OsTN4g001720	233	374	355	68	59	82	347	62	0.179	-2.485	9.03126466424432e-08	4.49591619095374e-06	0.1332	0.1462	down
OsTN4g001726	273	483	215	1346	1548	2938	346	1659	4.79	2.26	6.69164323075101e-05	0.00119452590904492	0.2099	0.1889	up
OsTN4g001730	151	145	95	433	316	407	138	353	2.549	1.35	0.000379172298127399	0.00479493555538924	0.0958	0.1269	up
OsTN4g001749	154	103	82	21	60	105	119	50	0.423	-1.241	0.00622654540300699	0.041932787666424	0.1327	0.1527	down
OsTN4g001757	30	34	32	58	107	151	34	87	2.559	1.355	0.000595300350627631	0.00686489099280053	0.0905	0.1675	up
OsTN4g001766	18	16	13	1	3	1	16	1	0.091	-3.453	0.00102618362969863	0.0105386325593312	0.5125	0.5129	down
OsTN4g001767	212	232	157	438	601	669	213	491	2.302	1.203	0.000624911619735315	0.0071135269563751	0.0836	0.1514	up
OsTN4g001773	112	100	76	26	66	48	101	39	0.383	-1.384	0.000444020003620094	0.0054366814184592	0.0936	0.143	down
OsTN4g001776	501	920	992	260	531	345	876	320	0.366	-1.451	0.000594317631341668	0.00685915796264788	0.1219	0.1868	down
OsTN4g001777	61	0	0	0	0	0	20	0	0.006	-7.306	0.00370966466375727	0.0282804510989152	2.6582	1.0986	down
OsTN4g001785	227	159	119	14	25	33	177	20	0.115	-3.121	8.96719615879501e-15	2.34774480172304e-12	0.0846	0.171	down
OsTN4g001799	6	5	4	50	72	121	5	68	12.603	3.656	7.71961817988089e-07	2.76070729748287e-05	0.2683	0.2019	up
OsTN4g001819	19	0	34	0	3	0	19	1	0.047	-4.401	0.00624867551928734	0.0420417708558143	1.2837	0.4132	down
OsTN4g001824	216	78	120	19	106	48	144	46	0.321	-1.641	0.00021851379758448	0.00309553914854648	0.1245	0.1364	down
OsTN4g001830	1263	1324	899	3561	4213	4468	1233	3577	2.9	1.536	0.0012592497429767	0.0122668393657818	0.1558	0.1716	up
OsTN4g001870	0	0	0	11	22	0	0	10	78.581	6.296	0.00186144398253694	0.0165933764344938	1.4145	0.24	up
OsTN4g001874	0	0	0	0	63	2	0	16	128.766	7.009	0.000465228256706806	0.00564745028047009	1.307	0.1214	up
OsTN4g001881	9	6	23	32	57	55	14	41	2.933	1.552	0.00680356696347663	0.0448890170132543	0.1856	0.1992	up
OsTN4g001889	17	42	41	5	5	8	36	5	0.146	-2.781	8.67049258789129e-05	0.00148286400251137	0.2557	0.2141	down
OsTN4g001890	192	357	156	5	33	15	251	14	0.057	-4.131	3.64945681549066e-15	1.03192040914814e-12	0.1396	0.1159	down
OsTN4g001892	626	619	570	227	165	148	645	168	0.26	-1.946	0.000126171696838185	0.00202246649648328	0.1701	0.1388	down
OsTN4g001902	12	12	14	32	101	83	14	58	4.295	2.103	0.000442437044955311	0.00542042889218213	0.204	0.201	up
OsTN4g001910	0	0	0	2	7	20	0	7	62.462	5.965	0.000586870487147976	0.00679353843938162	0.8332	1.0746	up
OsTN4g001924	910	753	371	181	429	458	709	293	0.413	-1.274	0.00203660779361332	0.0177591864634694	0.1173	0.1742	down
OsTN4g001925	4	0	5	13	21	9	3	12	3.79	1.922	0.00580741549213851	0.039792523535309	0.1832	0.3995	up
OsTN4g001929	30	9	12	54	58	78	18	55	3.106	1.635	0.000581578770057292	0.00675070661007389	0.124	0.1975	up
OsTN4g001948	29	24	12	62	67	103	23	67	2.934	1.553	0.00180205703692877	0.016200179560046	0.1457	0.1989	up
OsTN4g001950	16	18	0	0	0	0	12	0	0.011	-6.567	0.00230712799404129	0.0195709053478535	1.8694	1.6789	down
OsTN4g001961	24	11	2	0	0	0	12	0	0.01	-6.663	0.000226861381582506	0.00317770760846777	1.0793	1.3722	down
OsTN4g001963	50	48	24	22	15	13	43	16	0.356	-1.49	0.00225185140796888	0.0192095787646002	0.1278	0.2031	down
OsTN4g001966	15	0	2	0	0	0	5	0	0.022	-5.526	0.00458144075105841	0.0332963036352624	1.5223	0.7783	down
OsTN4g001972	0	0	8	13	179	131	3	82	26.495	4.728	4.436927794394e-05	0.00085075884028674	0.6429	0.1337	up
OsTN4g001987	99	168	33	5	2	11	106	5	0.05	-4.314	2.68549010530195e-11	3.72229991262342e-09	0.1927	0.1961	down
OsTN4g002006	32	27	19	11	11	7	28	9	0.314	-1.669	0.00171552516839408	0.0156142241399713	0.1355	0.2147	down
OsTN4g002043	389	373	240	84	132	168	353	108	0.307	-1.703	2.5718079819971e-06	7.82359818842993e-05	0.0849	0.1219	down
OsTN4g002046	141	148	64	608	885	1063	124	728	5.867	2.553	5.18345067638718e-07	1.95596865647941e-05	0.1628	0.1562	up
OsTN4g002047	28	10	27	174	179	283	23	185	7.989	2.998	4.62815051154654e-06	0.000128213272867479	0.2498	0.1483	up
OsTN4g002049	205	181	153	49	72	34	191	46	0.238	-2.068	9.82295172028228e-07	3.42623909756622e-05	0.109	0.1269	down
OsTN4g002050	102	92	73	327	613	541	94	417	4.414	2.142	2.61034976238481e-06	7.88571045739239e-05	0.1327	0.1263	up
OsTN4g002052	65	62	40	35	31	21	59	27	0.446	-1.164	0.00592137762255108	0.0403906900101128	0.1015	0.1841	down
OsTN4g002054	185	144	89	44	116	100	146	71	0.49	-1.03	0.0043960990572033	0.0322031339226634	0.0835	0.1178	down
OsTN4g002058	7	8	9	29	81	93	9	55	6.371	2.672	6.31340045857352e-07	2.32042085831835e-05	0.1386	0.201	up
OsTN4g002069	7	8	0	5	46	49	5	26	4.876	2.286	0.00323211163545246	0.0253395162488134	0.3192	0.2044	up
OsTN4g002070	1	4	4	12	51	20	3	22	6.692	2.742	0.000447392234576144	0.00546849978020535	0.2793	0.212	up
OsTN4g002077	439	251	181	110	217	175	302	141	0.467	-1.098	0.00215294994551037	0.0185307578795148	0.0857	0.119	down
OsTN4g002082	53	48	65	24	21	25	59	21	0.349	-1.517	0.00056167418134831	0.00655280060135554	0.107	0.176	down
OsTN4g002094	16	6	22	0	0	2	16	1	0.043	-4.547	0.000128573488320659	0.00204763821308379	0.5472	0.5198	down
OsTN4g002109	50	51	71	31	29	12	62	22	0.357	-1.486	0.00429148933165647	0.0315786309009156	0.1616	0.195	down
OsTN4g002127	122	122	105	227	323	505	124	297	2.398	1.262	0.000777674220555219	0.00847489064507427	0.0934	0.1172	up
OsTN4g002146	6	1	1	0	149	40	3	47	16.359	4.032	0.000117773471468005	0.00190222544510432	0.5403	0.1407	up
OsTN4g002155	7	5	2	34	69	69	5	48	9.552	3.256	2.02521713169608e-08	1.2098247806163e-06	0.1426	0.2079	up
OsTN4g002157	5	3	4	23	36	33	4	26	6.038	2.594	2.31093696290707e-05	0.000502594826509413	0.1527	0.2845	up
OsTN4g002185	39	39	52	106	108	149	47	106	2.273	1.185	0.00235346805032477	0.0198844609335607	0.0922	0.1575	up
OsTN4g002205	415	516	517	220	138	235	519	181	0.347	-1.527	0.000631011134256689	0.00716373293585739	0.1344	0.1685	down
OsTN4g002210	3	1	0	16	18	21	1	16	10.669	3.415	0.000305800471965233	0.00403805143771276	0.3571	0.2594	up
OsTN4g002223	1	1	0	11	26	14	1	14	17.392	4.12	4.7300168389665e-05	0.000894821294415366	0.3298	0.2067	up
OsTN4g002224	216	180	69	62	64	57	161	55	0.337	-1.568	0.00288833522276909	0.0231843016916216	0.1806	0.155	down
OsTN4g002232	158	202	79	212	464	643	155	361	2.332	1.222	0.0073209773542744	0.0474788889150144	0.1412	0.1462	up
OsTN4g002246	11	15	7	4	2	1	12	2	0.191	-2.389	0.005971284025023	0.040613540833439	0.3298	0.3603	down
OsTN4g002258	8	1	9	21	29	46	6	27	4.19	2.067	0.00193096884450725	0.0170910084663879	0.2252	0.2318	up
OsTN4g002266	102	79	55	21	21	7	82	15	0.18	-2.472	2.62051896839541e-06	7.90517009427617e-05	0.1527	0.1647	down
OsTN4g002272	0	0	0	4	14	5	0	6	51.532	5.687	0.000681006657135147	0.0075811591484856	0.7114	0.3074	up
OsTN4g002303	100	71	49	146	282	231	77	185	2.408	1.268	0.000354551582996741	0.00454928400569656	0.0798	0.1253	up
OsTN4g002313	136	154	143	350	369	764	154	423	2.736	1.452	0.00432458115380195	0.0318110969575713	0.1754	0.1518	up
OsTN4g002314	92	40	41	110	238	278	60	172	2.869	1.521	1.56353463775452e-05	0.000364372297394067	0.0759	0.1171	up
OsTN4g002317	998	881	647	194	183	135	890	156	0.175	-2.516	2.18961588473857e-07	9.55456462297341e-06	0.1493	0.1759	down
OsTN4g002318	314	361	275	79	54	39	338	54	0.159	-2.649	4.27742670821196e-08	2.33191229308614e-06	0.1418	0.1156	down
OsTN4g002319	3056	2959	2115	485	498	383	2872	411	0.143	-2.805	2.06874459666172e-07	9.0644352606209e-06	0.1827	0.1805	down
OsTN4g002321	441	102	103	12	43	45	218	26	0.123	-3.018	4.71178267856625e-05	0.000892964926401737	0.3297	0.1161	down
OsTN4g002322	12	8	2	0	0	1	8	0	0.052	-4.258	0.00335659329841129	0.0261703213527236	0.8307	1.0304	down
OsTN4g002323	10	4	22	102	78	133	13	93	7.099	2.828	1.10632379540844e-05	0.000269986291475566	0.2311	0.1973	up
OsTN4g002324	56	54	92	827	250	414	73	495	6.769	2.759	1.46656921470186e-05	0.000344806356276967	0.2506	0.126	up
OsTN4g002355	377	278	209	1345	1246	1369	303	1186	3.914	1.969	1.38788529515988e-05	0.000327760394815764	0.136	0.1806	up
OsTN4g002356	2099	2085	1644	10841	5235	5135	2065	6885	3.334	1.737	0.000641785130940662	0.00725497722380523	0.1761	0.1551	up
OsTN4g002361	90	167	67	15	42	36	116	25	0.222	-2.172	0.000213457350099061	0.00304161699871275	0.2122	0.1431	down
OsTN4g002362	58	40	40	134	207	245	49	166	3.407	1.768	5.02868706733117e-07	1.90775253375478e-05	0.0731	0.127	up
OsTN4g002376	8	5	8	11	32	37	7	21	2.901	1.537	0.00698019134060878	0.0458152020304211	0.1508	0.2153	up
[truncated: 1,304 more rows]

## Sheet: Table 2
Table 2. Differentially expressed gene sets in over-expression GFP TN1 rice with and without BPH feeding.
Id	TN1_GFP_1_FS	TN1_GFP_2_FS	TN1_GFP_3_FS	TN1_GFP_1_CK	TN1_GFP_2_CK	TN1_GFP_3_CK	TN1_GFP_FS	TN1_GFP_CK	FC	log2FoldChange	pvalue	padj	tagwise.dispersion	trended.dispersion	gene_type
OsTN.contig.g000032	9	4	9	7	90	2	8	50	6.217	2.636	0.00739603	0.0432564	0.5661	0.2244	up
OsTN.contig.g000070	22	16	41	5	4	0	29	3	0.115	-3.123	4.49801553802071e-05	0.000692231	0.2519	0.2156	down
OsTN.contig.g000167	7	19	11	149	164	37	15	138	9.365	3.227	2.81778764900917e-06	7.07470556388734e-05	0.2618	0.168	up
OsTN10g000024	389	88	122	830	306	221	194	459	2.364	1.241	0.00314634	0.0221971	0.1201	0.1634	up
OsTN10g000028	10	0	2	30	22	4	3	20	5.273	2.399	0.00830613	0.0472373	0.4363	0.3227	up
OsTN10g000030	37	30	46	7	8	9	42	10	0.231	-2.112	0.0013383	0.0110865	0.2295	0.2054	down
OsTN10g000075	390	29	435	193	61	45	289	98	0.343	-1.544	0.00663538	0.0397168	0.2166	0.1222	down
OsTN10g000089	594	643	893	100	215	351	808	296	0.366	-1.452	0.00565036	0.0352744	0.1879	0.1814	down
OsTN10g000100	16	7	2	51	64	15	8	53	6.052	2.597	0.00018474	0.0021973	0.2599	0.2041	up
OsTN10g000143	30	29	14	6	9	2	27	7	0.251	-1.994	0.00268702	0.0195149	0.2105	0.2078	down
OsTN10g000181	38	39	14	10	4	5	34	7	0.205	-2.288	0.00112179	0.00961978	0.2523	0.2099	down
OsTN10g000184	127	239	87	53	18	71	180	54	0.303	-1.722	0.00316867	0.0223249	0.22	0.1203	down
OsTN10g000190	5	18	1	0	0	0	10	0	0.012	-6.328	0.000232147	0.00264542	0.7466	0.9729	down
OsTN10g000204	17	42	24	1	0	2	34	1	0.037	-4.752	4.68031189888301e-07	1.51534922808568e-05	0.307	0.2658	down
OsTN10g000214	5	0	4	52	17	14	3	28	8.745	3.129	3.99991850460868e-05	0.000632088	0.2532	0.2077	up
OsTN10g000215	21	0	15	57	39	21	12	44	3.637	1.863	0.00643956	0.0388517	0.2721	0.2019	up
OsTN10g000216	12	3	8	33	53	27	8	48	5.851	2.549	2.02254771833666e-05	0.000362878	0.1756	0.2034	up
OsTN10g000226	16	28	12	95	26	53	22	60	2.808	1.49	0.00456749	0.0298682	0.1592	0.1897	up
OsTN10g000233	4	6	1	40	21	17	4	28	6.712	2.747	0.00102239	0.00893725	0.3461	0.2176	up
OsTN10g000253	0	0	2	30	6	1	1	10	13.134	3.715	0.000771504	0.00711051	0.4237	0.3957	up
OsTN10g000271	2	1	0	24	8	10	1	15	12.599	3.655	0.00173385	0.0137354	0.5794	0.6536	up
OsTN10g000341	279	173	133	74	30	25	208	45	0.217	-2.203	6.88123012391233e-07	2.12107917496815e-05	0.1182	0.1178	down
OsTN10g000381	0	0	0	0	1	30	0	14	113.559	6.827	0.00225993	0.0169591	1.8137	0.1868	up
OsTN10g000383	224	90	102	60	16	20	142	32	0.229	-2.126	2.85157725379723e-08	1.28721763012082e-06	0.0814	0.1381	down
OsTN10g000394	0	0	0	1	2	65	0	31	246.483	7.945	4.68808379643639e-05	0.000715768	1.1245	0.2066	up
OsTN10g000395	0	0	0	0	24	529	0	253	2023.51	10.983	3.57626169287549e-05	0.000578175	2.023	0.1596	up
OsTN10g000396	0	0	0	0	42	810	0	390	3120.19	11.607	1.1049959761968e-05	0.000219622	1.9043	0.1881	up
OsTN10g000450	0	0	0	0	0	18	0	8	65.795	6.04	0.00571126	0.0355215	1.8132	0.7468	up
OsTN10g000454	147	61	45	282	124	158	86	204	2.365	1.242	0.000145425	0.00180141	0.0665	0.1179	up
OsTN10g000458	5	0	0	71	34	21	1	45	24.946	4.641	2.28402774431096e-09	1.41801277584413e-07	0.2153	0.2055	up
OsTN10g000486	4	17	55	5	3	7	30	6	0.196	-2.354	0.0064226	0.0387825	0.4034	0.2268	down
OsTN10g000503	2420	2013	1612	690	849	426	2221	804	0.362	-1.466	0.00614066	0.0375397	0.1971	0.1789	down
OsTN10g000587	65	52	18	268	94	80	49	150	3.077	1.621	0.00255193	0.0187262	0.1852	0.1303	up
OsTN10g000607	79	98	58	16	6	11	90	12	0.135	-2.887	9.05807359035928e-05	0.00122666	0.3057	0.1773	down
OsTN10g000654	124	190	70	465	133	299	149	316	2.133	1.093	0.00789823	0.0453309	0.1138	0.122	up
OsTN10g000660	8	8	2	78	15	28	6	39	5.96	2.575	0.000215931	0.00248467	0.2465	0.2031	up
OsTN10g000666	27	14	23	0	2	2	23	2	0.08	-3.651	0.000861422	0.0077506	0.5279	0.2119	down
OsTN10g000686	0	0	0	3	19	0	0	11	84.023	6.393	0.000298353	0.00325975	0.8531	0.6689	up
OsTN10g000704	241	111	119	591	241	151	163	336	2.059	1.042	0.00432014	0.0286303	0.0894	0.1407	up
OsTN10g000736	2462	93	1590	217	173	89	1328	183	0.138	-2.86	0.000343718	0.00366293	0.3974	0.1819	down
OsTN10g000765	8	11	10	116	199	186	11	216	19.526	4.287	3.07167438018317e-10	2.42159846024329e-08	0.2305	0.1241	up
OsTN10g000776	2	6	2	237	123	11	4	126	31.712	4.987	6.42651760770934e-09	3.58650418175505e-07	0.3261	0.1751	up
OsTN10g000779	186	174	123	40	9	27	179	27	0.151	-2.731	2.73576759785799e-09	1.65764066993641e-07	0.1172	0.1251	down
OsTN10g000785	30	8	29	175	51	16	23	76	3.269	1.709	0.0026652	0.0194022	0.1964	0.171	up
OsTN10g000806	1	2	2	24	8	15	2	17	8.571	3.1	0.000234944	0.00267156	0.2635	0.3817	up
OsTN10g000815	57	35	14	424	260	338	37	392	10.467	3.388	3.87682059223082e-15	8.93649285863468e-13	0.1018	0.1167	up
OsTN10g000822	140	104	101	61	16	19	125	32	0.256	-1.968	0.000598971	0.00580282	0.2036	0.1623	down
OsTN10g000865	14	27	8	1	1	5	19	3	0.154	-2.7	0.00810391	0.0463546	0.5149	0.378	down
OsTN10g000866	28	62	63	19	10	9	61	14	0.23	-2.121	0.000949255	0.00838785	0.2341	0.204	down
OsTN10g000902	5	5	6	25	29	42	6	40	6.631	2.729	3.97122790866334e-05	0.00062965	0.2091	0.2252	up
OsTN10g000938	139	59	80	373	96	143	96	204	2.125	1.088	0.00394119	0.0265505	0.0926	0.118	up
OsTN10g000945	32	21	37	100	59	105	33	103	3.11	1.637	0.000101946	0.00135293	0.102	0.14	up
OsTN10g000975	10	9	6	42	25	43	9	43	4.612	2.205	6.81303396601153e-06	0.000148799	0.1033	0.186	up
OsTN10g000978	16	2	7	10	28	81	8	54	6.42	2.683	0.000992762	0.00871781	0.3752	0.1447	up
OsTN10g001006	120	74	16	237	115	139	73	180	2.457	1.297	0.00493449	0.0316246	0.1389	0.1151	up
OsTN10g001009	3	5	5	24	13	98	5	57	11.263	3.494	3.71841447295626e-05	0.000597284	0.3602	0.2038	up
OsTN10g001010	5	1	3	3	25	19	3	22	6.958	2.799	0.00869197	0.0488048	0.6028	0.2487	up
OsTN10g001011	0	1	0	0	16	10	0	13	25.037	4.646	0.0007926	0.00726355	0.6655	0.2051	up
OsTN10g001060	3	7	0	0	0	0	4	0	0.031	-5.019	0.00452615	0.029662	0.775	0.6792	down
OsTN10g001061	4	12	8	67	51	38	10	60	6.311	2.658	2.7464221694224e-05	0.00046632	0.2078	0.1813	up
OsTN10g001096	47	0	46	1	2	0	31	1	0.043	-4.54	0.00461929	0.0301234	1.2217	0.5468	down
OsTN10g001102	19	21	13	7	0	2	20	3	0.155	-2.689	0.000499469	0.00497756	0.2541	0.3076	down
OsTN10g001139	35	10	2	100	105	29	15	92	5.963	2.576	3.48837621923963e-05	0.000568187	0.2213	0.1661	up
OsTN10g001148	130	82	93	512	298	423	110	471	4.291	2.101	7.94428958812951e-10	5.52375571460533e-08	0.0727	0.1219	up
OsTN10g001150	116	56	46	354	172	68	75	206	2.722	1.445	0.000343562	0.00366293	0.104	0.1154	up
OsTN10g001184	0	0	0	0	0	17	0	8	62.169	5.958	0.00646791	0.0389563	1.8346	0.3158	up
OsTN10g001201	527	177	319	346	106	75	349	172	0.496	-1.012	0.00767607	0.0444044	0.0975	0.1338	down
OsTN10g001204	0	0	0	0	5	16	0	10	79.336	6.31	0.00479397	0.0309673	1.9048	0.6771	up
OsTN10g001215	43	31	40	374	70	169	42	203	4.904	2.294	1.58354086430347e-08	7.77364609011195e-07	0.0959	0.1163	up
OsTN10g001228	85	20	50	17	14	13	52	17	0.323	-1.629	0.000526833	0.00519654	0.113	0.1977	down
OsTN10g001235	0	1	2	66	66	39	1	68	54.461	5.767	1.41517933016903e-09	9.23437170919831e-08	0.3162	0.1794	up
OsTN10g001257	83	44	35	924	504	245	57	597	10.499	3.392	1.15651461016107e-15	2.99100065093728e-13	0.1011	0.1433	up
OsTN10g001292	183	116	122	134	23	35	151	60	0.407	-1.295	0.000611501	0.00590533	0.0887	0.1237	down
OsTN10g001298	113	41	88	379	182	156	84	257	3.044	1.606	1.90718110612463e-06	5.09390298710138e-05	0.0705	0.1183	up
OsTN10g001315	37	59	26	21	10	13	47	16	0.344	-1.541	0.00700077	0.0414014	0.1836	0.2024	down
OsTN10g001329	100	35	138	71	12	19	97	32	0.337	-1.568	0.00176046	0.0138943	0.1545	0.1653	down
OsTN10g001331	18	12	3	4	0	0	12	1	0.116	-3.107	0.00469043	0.0304832	0.5271	0.5676	down
OsTN10g001340	396	182	124	25	8	14	240	17	0.07	-3.835	2.26906865431546e-17	9.07927150039019e-15	0.0992	0.1156	down
OsTN10g001347	54	23	39	0	0	4	41	2	0.042	-4.564	5.18665737822487e-07	1.65155319849872e-05	0.3104	0.2142	down
OsTN10g001356	99	45	36	464	289	70	62	294	4.745	2.247	2.96027578556206e-05	0.000495099	0.1824	0.1251	up
OsTN10g001414	157	105	137	56	20	36	145	40	0.279	-1.84	7.06796649828447e-05	0.00100127	0.1301	0.1238	down
OsTN10g001429	3	1	1	20	63	39	1	55	29.44	4.88	1.05570523714395e-08	5.48057129055278e-07	0.2774	0.2207	up
OsTN10g001445	137	95	122	45	15	35	129	35	0.269	-1.894	0.000169013	0.00204248	0.1538	0.132	down
OsTN10g001446	134	147	102	99	11	41	145	48	0.338	-1.563	0.00463058	0.0301692	0.1971	0.1329	down
OsTN10g001449	0	0	0	0	1	45	0	21	167.868	7.391	0.00035028	0.00372628	1.3754	0.1903	up
OsTN10g001483	0	4	10	15	262	195	6	230	39.738	5.312	9.28324134582777e-05	0.00125156	0.888	0.1247	up
OsTN10g001489	1	1	0	8	15	1	1	10	12.041	3.59	0.00787455	0.0452317	0.7722	0.9871	up
OsTN10g001495	127	124	132	64	10	66	143	51	0.354	-1.497	0.00165068	0.0131899	0.1429	0.1607	down
OsTN10g001518	25	9	6	30	22	37	13	35	2.558	1.355	0.00865381	0.0486407	0.1361	0.2036	up
OsTN10g001521	11	7	3	55	194	199	8	205	27.164	4.764	3.18410620535073e-10	2.49170997405435e-08	0.2719	0.1201	up
OsTN10g001522	2	4	0	31	54	41	3	54	22.959	4.521	9.15163861173881e-09	4.8674474363956e-07	0.2379	0.202	up
OsTN10g001523	15	18	17	75	327	304	19	328	17.226	4.106	6.58922816506996e-09	3.64850552732738e-07	0.265	0.1168	up
OsTN10g001524	1	2	5	23	73	62	3	72	22.771	4.509	1.58328530918513e-07	5.87005796361697e-06	0.3239	0.2032	up
OsTN10g001525	56	18	26	197	87	58	33	119	3.491	1.804	1.8740279362753e-05	0.00033997	0.1038	0.1446	up
OsTN10g001537	94	59	71	36	15	39	80	34	0.423	-1.243	0.00512769	0.0325578	0.1158	0.173	down
OsTN10g001547	9	3	7	27	76	58	6	73	10.663	3.415	5.94888332850198e-06	0.000132938	0.2913	0.1786	up
OsTN10g001565	51	43	32	203	93	62	46	125	2.731	1.449	0.000101141	0.00134476	0.0814	0.1357	up
OsTN10g001566	69	39	47	181	62	78	55	111	2.022	1.016	0.00776479	0.0448179	0.0888	0.1244	up
OsTN10g001569	360	436	427	769	946	1672	467	1440	3.083	1.625	0.0061252	0.0374559	0.2394	0.1893	up
OsTN10g001580	87	59	92	188	156	125	87	184	2.106	1.075	0.00346595	0.0240047	0.086	0.115	up
OsTN10g001615	43	19	21	14	1	10	29	9	0.305	-1.713	0.00425793	0.0283076	0.1791	0.2128	down
OsTN10g001645	67	25	43	22	13	13	46	18	0.382	-1.39	0.00338205	0.0235389	0.1173	0.2018	down
OsTN10g001655	150	60	101	9	10	23	108	18	0.161	-2.634	7.04422531866296e-06	0.000152937	0.1913	0.155	down
OsTN10g001656	29	47	70	2	2	3	57	3	0.05	-4.316	9.54026900383547e-06	0.000193576	0.4301	0.2019	down
OsTN10g001663	115	91	65	1503	389	218	99	662	6.716	2.748	2.78953970435281e-08	1.26948001094871e-06	0.1504	0.1726	up
OsTN10g001667	401	223	308	1537	575	1983	332	1570	4.721	2.239	4.51551629566792e-05	0.00069442	0.1968	0.1891	up
OsTN10g001670	10453	779	7971	2362	1075	520	6295	1365	0.217	-2.205	0.00161409	0.0129659	0.3223	0.1529	down
OsTN10g001690	81	35	39	41	2	12	54	16	0.321	-1.641	0.00612462	0.0374559	0.2129	0.1946	down
OsTN10g001702	6	2	0	15	22	16	3	23	7.718	2.948	0.000104337	0.00137861	0.2334	0.2086	up
OsTN10g001703	60	43	90	20	8	22	71	19	0.266	-1.913	0.000378244	0.00396512	0.1636	0.2034	down
OsTN10g001704	183	333	308	42	43	121	325	88	0.269	-1.895	0.00346801	0.0240068	0.276	0.1205	down
OsTN10g001709	54	79	29	3	3	1	63	3	0.044	-4.508	3.91798719951772e-07	1.30437605243599e-05	0.3378	0.2057	down
OsTN10g001721	37	8	10	2	1	0	18	1	0.066	-3.931	5.88581324492127e-06	0.000131975	0.2265	0.4014	down
OsTN10g001724	72	58	70	55	11	29	74	32	0.446	-1.166	0.00506367	0.0322434	0.099	0.167	down
OsTN10g001727	107	165	87	13	6	32	140	21	0.148	-2.76	9.27407309994938e-06	0.000188929	0.222	0.1533	down
OsTN10g001728	18	18	10	0	0	2	17	1	0.052	-4.271	4.01613776077078e-06	9.50560641659218e-05	0.2269	0.2602	down
OsTN10g001734	203	20	204	2	0	0	144	0	0.005	-7.535	1.66707507393927e-09	1.08181195588375e-07	0.5213	0.1695	down
OsTN10g001737	709	304	474	3067	926	641	518	1510	2.915	1.543	0.000153521	0.00188301	0.1133	0.1859	up
OsTN10g001738	1419	861	692	558	307	336	1054	447	0.424	-1.238	0.00057652	0.00562644	0.0888	0.1882	down
OsTN10g001759	4	5	0	7	0	627	3	286	82.13	6.36	0.000341111	0.00364064	1.3881	0.1816	up
OsTN10g001760	6	8	9	60	14	116	9	74	8.462	3.081	1.22954214104868e-05	0.00024012	0.2617	0.2047	up
OsTN10g001772	72	49	41	47	5	9	58	18	0.327	-1.61	0.00192636	0.0149297	0.1547	0.2001	down
OsTN10g001789	4	2	0	10	19	46	2	33	15.087	3.915	0.000109442	0.0014302	0.4683	0.4249	up
OsTN10g001807	5	1	6	10	20	38	4	30	6.818	2.769	0.000217088	0.00249257	0.2626	0.1931	up
OsTN10g001808	19	10	5	311	120	38	12	155	12.978	3.698	6.50118351231433e-08	2.70865616396169e-06	0.2472	0.1372	up
OsTN10g001809	73	12	71	224	85	57	53	124	2.326	1.218	0.00564015	0.0352314	0.1226	0.136	up
OsTN10g001816	4	1	4	48	23	9	3	27	8.447	3.078	8.91168188896571e-06	0.000182776	0.1914	0.2284	up
OsTN10g001830	69	235	64	398	414	387	153	488	3.199	1.678	0.00221948	0.0167028	0.201	0.137	up
OsTN10g001833	165	65	161	87	24	39	138	51	0.376	-1.412	9.34695623599893e-05	0.00125935	0.0775	0.1371	down
OsTN10g001858	183	183	164	344	261	484	199	439	2.21	1.144	0.00376143	0.0255423	0.1055	0.128	up
OsTN10g001860	88	35	52	307	102	95	60	170	2.809	1.49	7.07623274310996e-05	0.00100177	0.0866	0.1176	up
OsTN10g001862	303	151	134	64	17	23	204	35	0.173	-2.527	7.07552980361836e-11	6.52394611066672e-09	0.0838	0.1184	down
OsTN10g001867	46	41	15	15	0	10	37	8	0.231	-2.117	0.00108251	0.00935483	0.2202	0.2112	down
OsTN10g001880	14	14	21	112	92	305	19	214	11.584	3.534	8.56701438551608e-10	5.89215910541011e-08	0.1774	0.1336	up
OsTN10g001888	148	303	169	21	23	35	247	33	0.132	-2.919	2.24832838533722e-06	5.83602204012809e-05	0.2232	0.1322	down
OsTN10g001891	29	22	4	0	0	2	20	1	0.045	-4.462	7.49855225795804e-06	0.000160304	0.3028	0.3588	down
OsTN10g001898	0	2	0	27	121	64	1	99	110.054	6.782	5.73418278963726e-09	3.25149504924038e-07	0.4622	0.1464	up
OsTN10g001902	162	107	184	61	54	36	165	59	0.356	-1.489	0.0034943	0.0241129	0.1674	0.1326	down
OsTN10g001903	289	97	89	21	18	67	158	45	0.28	-1.834	0.000731241	0.00680748	0.1851	0.1159	down
OsTN10g001904	193	158	130	42	9	43	176	34	0.196	-2.354	1.3024965959177e-08	6.56105589302294e-07	0.097	0.1169	down
OsTN10g001914	222	182	214	1129	755	1123	228	1176	5.154	2.366	1.19957376763741e-07	4.57542462055515e-06	0.128	0.1812	up
OsTN10g001916	1014	1294	655	19	8	30	1132	23	0.02	-5.668	2.91807434213439e-16	8.47720583200604e-14	0.2222	0.188	down
OsTN10g001917	196	144	65	6	4	7	145	7	0.045	-4.47	6.8949132792795e-15	1.49204516238449e-12	0.1394	0.1264	down
OsTN10g001919	0	0	0	24	48	41	0	50	395.407	8.627	1.69776782572433e-07	6.23995880071678e-06	0.673	0.2077	up
OsTN10g001941	584	298	474	95	18	77	482	67	0.14	-2.836	6.15949222240486e-08	2.58202683687612e-06	0.1658	0.1383	down
OsTN10g001948	149	83	111	0	0	3	122	1	0.01	-6.585	1.63246592618409e-16	4.87601477416703e-14	0.1903	0.2037	down
OsTN10g001949	135	96	94	0	0	6	118	3	0.022	-5.538	4.754937464564e-12	5.63340552016809e-10	0.2411	0.2053	down
OsTN10g001973	449	407	202	9	7	56	390	31	0.08	-3.65	2.44464346783099e-06	6.25374596167574e-05	0.3386	0.1286	down
OsTN10g001975	68	36	37	1	2	2	49	2	0.04	-4.628	1.70350868443626e-12	2.21974168142943e-10	0.1263	0.2043	down
OsTN10g001978	0	2	1	1	7	10	1	9	6.349	2.666	0.00487175	0.0313456	0.2503	0.2459	up
OsTN10g001980	0	2	1	23	4	11	1	12	10.226	3.354	0.000574976	0.00561396	0.331	0.4	up
OsTN10g001983	25	10	18	62	29	32	18	45	2.385	1.254	0.00532023	0.0334994	0.104	0.2029	up
OsTN10g001984	21	21	1	132	65	90	16	107	6.761	2.757	4.97776955273946e-07	1.59461569342818e-05	0.1628	0.169	up
OsTN10g002021	1	0	0	3	16	26	0	21	45.285	5.501	0.000140303	0.00174715	0.7492	0.2162	up
OsTN10g002040	91	49	58	206	97	100	70	146	2.074	1.052	0.0028196	0.0202902	0.0765	0.1332	up
OsTN10g002043	613	223	271	986	506	1432	375	1151	3.065	1.616	0.000198248	0.00232997	0.1276	0.1873	up
OsTN10g002047	50	24	113	31	7	16	69	18	0.272	-1.88	0.00354606	0.0243922	0.2506	0.2046	down
OsTN10g002048	273	215	1034	170	154	132	577	182	0.314	-1.672	0.00290576	0.0207693	0.2118	0.1331	down
OsTN10g002050	1	3	0	59	83	14	2	64	39.24	5.294	9.6191624684886e-09	5.06985460969708e-07	0.318	0.1991	up
OsTN10g002051	6	10	2	63	312	98	7	223	31.947	4.998	9.15787960164966e-09	4.8674474363956e-07	0.3569	0.1387	up
OsTN10g002052	1	11	1	147	539	42	6	337	60.494	5.919	1.53194373731957e-08	7.55533275286886e-07	0.4815	0.1152	up
OsTN10g002054	70	69	70	224	201	54	78	184	2.344	1.229	0.00497611	0.0318336	0.1242	0.117	up
OsTN10g002058	0	0	0	0	3	16	0	9	70.117	6.132	0.000463134	0.00467255	0.8224	0.2787	up
OsTN10g002065	1283	654	964	235	123	606	1027	396	0.385	-1.377	0.00438543	0.0289275	0.1604	0.186	down
OsTN10g002075	7632	7920	3231	2124	2209	1397	7012	2302	0.328	-1.608	0.000122254	0.00156344	0.1199	0.1517	down
OsTN10g002076	1101	594	295	397	195	107	689	246	0.357	-1.486	0.00065021	0.00618618	0.1285	0.1674	down
OsTN10g002079	22	15	18	181	152	29	20	136	6.799	2.765	6.61341122798622e-08	2.742781202073e-06	0.1442	0.1513	up
OsTN10g002087	818	522	1105	1910	2096	1441	895	2211	2.469	1.304	0.00529006	0.0333888	0.1517	0.1809	up
OsTN10g002088	249	89	187	804	290	278	182	471	2.588	1.372	0.00174817	0.0138179	0.1298	0.1623	up
OsTN10g002092	177	92	112	741	382	168	134	454	3.375	1.755	0.000120944	0.00154883	0.1373	0.1596	up
OsTN10g002109	88	29	58	187	141	85	60	157	2.593	1.375	0.000255634	0.00286232	0.0868	0.1227	up
OsTN10g002111	33	6	16	3	0	2	18	2	0.102	-3.292	0.000324508	0.00348801	0.3406	0.2788	down
OsTN10g002115	432	115	342	211	83	89	304	134	0.443	-1.175	0.00164327	0.0131455	0.0921	0.1305	down
OsTN10g002123	14	4	28	2	2	1	17	2	0.119	-3.07	0.000350365	0.00372628	0.2753	0.3438	down
OsTN10g002136	244	132	120	1795	384	345	174	787	4.52	2.176	1.55431054400391e-06	4.28638019592861e-05	0.1328	0.1836	up
OsTN10g002148	210	98	93	85	28	55	139	60	0.434	-1.205	0.000740621	0.0068797	0.0771	0.1242	down
OsTN10g002176	33	14	37	616	334	100	30	368	12.248	3.614	1.11075783985064e-12	1.53959748429493e-10	0.1404	0.1238	up
OsTN10g002177	226	119	131	116	47	45	167	73	0.437	-1.194	0.000120059	0.00153935	0.0574	0.1186	down
OsTN10g002192	26	99	16	372	164	266	59	296	5.042	2.334	2.53495853704465e-05	0.000437064	0.1913	0.115	up
OsTN10g002193	12	29	24	82	52	67	26	77	2.996	1.583	0.00671357	0.0400266	0.2081	0.1489	up
OsTN10g002195	60	71	65	158	94	279	75	214	2.87	1.521	0.00174514	0.0138042	0.1535	0.1225	up
OsTN10g002200	1	2	0	26	19	11	1	21	17.341	4.116	1.04646205418085e-06	3.04004394287854e-05	0.2098	0.4118	up
OsTN10g002206	14	19	36	10	1	8	27	7	0.257	-1.961	0.00565539	0.0352955	0.2578	0.2193	down
OsTN11g000012	0	1	0	15	10	6	0	12	23.359	4.546	8.98634227652246e-05	0.0012185	0.3624	0.533	up
OsTN11g000044	3	9	8	0	0	0	8	0	0.015	-6.025	0.00123279	0.0103704	1.014	1.7735	down
OsTN11g000051	150	98	92	518	219	105	122	286	2.349	1.232	0.006235	0.0379632	0.1361	0.1466	up
OsTN11g000054	72	16	58	11	4	16	49	12	0.239	-2.063	0.000671313	0.00634937	0.1991	0.2025	down
OsTN11g000057	15	10	11	33	21	33	13	34	2.57	1.362	0.0053465	0.0336449	0.1132	0.204	up
OsTN11g000060	430	108	272	1023	289	584	272	661	2.423	1.277	0.00251203	0.0185038	0.1221	0.172	up
OsTN11g000062	2	2	3	115	104	25	3	93	34.79	5.121	3.20471895627849e-11	3.23630832884752e-09	0.2327	0.1556	up
OsTN11g000063	1	0	11	156	352	50	5	245	52.974	5.727	3.10810886668372e-11	3.15376386295511e-09	0.3189	0.1154	up
OsTN11g000075	13	8	5	49	50	30	9	52	5.493	2.458	8.20416131589821e-05	0.00112758	0.2028	0.1979	up
OsTN11g000087	148	39	81	53	22	29	90	38	0.415	-1.269	0.001333	0.0110555	0.0901	0.1649	down
OsTN11g000093	5	2	8	18	36	27	5	36	6.334	2.663	0.000370045	0.00388685	0.2797	0.231	up
OsTN11g000095	4	0	17	8	32	144	8	84	10.716	3.422	0.000924233	0.00820779	0.5962	0.1423	up
OsTN11g000096	4	0	0	2	12	27	1	19	13.503	3.755	0.000928222	0.00823977	0.5742	0.2059	up
OsTN11g000098	3	1	0	15	4	11	1	11	7.239	2.856	0.00171782	0.0136237	0.2902	0.583	up
OsTN11g000126	1049	734	482	2663	1223	856	813	1667	2.05	1.036	0.00638575	0.0386259	0.1008	0.1807	up
OsTN11g000130	17	38	29	0	0	4	34	2	0.054	-4.209	0.001457	0.0119346	0.8276	0.3203	down
OsTN11g000134	79	210	45	10	0	22	137	12	0.091	-3.455	8.88867495653312e-05	0.00120835	0.4338	0.1901	down
OsTN11g000137	1060	440	736	4654	1702	864	778	2397	3.08	1.623	0.000112531	0.00146318	0.1203	0.1778	up
OsTN11g000139	178	78	168	421	404	181	150	395	2.627	1.393	0.00596417	0.0367681	0.1737	0.143	up
OsTN11g000149	3	0	4	24	18	12	2	20	7.935	2.988	7.75414977451279e-05	0.00108044	0.2183	0.2202	up
OsTN11g000182	22	0	22	2	2	1	15	2	0.135	-2.885	0.00365635	0.0249566	0.4301	0.4507	down
OsTN11g000189	99	68	129	308	114	475	109	349	3.209	1.682	0.00798662	0.0457886	0.2691	0.1494	up
OsTN11g000192	1	0	0	18	4	0	0	6	14.72	3.88	0.00404711	0.0271518	0.6106	0.9545	up
OsTN11g000194	44	38	22	388	107	111	38	199	5.27	2.398	7.16942982886093e-09	3.89851534309368e-07	0.0989	0.1171	up
OsTN11g000203	18	25	6	162	41	20	19	69	3.753	1.908	0.00211227	0.0160484	0.2292	0.1779	up
OsTN11g000212	62	16	49	2	0	0	43	0	0.019	-5.737	5.8118440826476e-13	8.4419025658019e-11	0.1544	0.2099	down
OsTN11g000230	961	154	825	295	79	59	653	138	0.213	-2.228	4.17368941729157e-05	0.000655527	0.1913	0.1793	down
OsTN11g000245	110	30	50	26	8	7	63	14	0.222	-2.175	1.250002411269e-05	0.000243304	0.1284	0.2011	down
OsTN11g000254	31	25	51	109	17	188	40	120	3.018	1.594	0.00473589	0.0306575	0.2025	0.1539	up
OsTN11g000261	49	32	39	29	13	6	44	16	0.388	-1.367	0.00646184	0.0389418	0.1345	0.203	down
OsTN11g000283	48	33	23	24	4	10	37	12	0.346	-1.532	0.00821626	0.0468393	0.1836	0.2099	down
OsTN11g000291	108	84	79	17	14	26	99	23	0.228	-2.132	6.81072331654864e-07	2.1024018831739e-05	0.0968	0.1577	down
OsTN11g000295	74	28	42	38	12	13	49	21	0.439	-1.189	0.00565989	0.0353131	0.0967	0.2008	down
OsTN11g000298	0	0	1	16	7	5	0	10	20.394	4.35	0.000181692	0.00216713	0.3567	0.8307	up
OsTN11g000303	55	28	14	6	4	9	33	7	0.222	-2.173	0.000425102	0.00436991	0.1803	0.2198	down
OsTN11g000306	53	17	23	121	87	25	31	86	2.713	1.44	0.00588146	0.0363321	0.1688	0.1736	up
OsTN11g000325	19	11	28	0	0	0	21	0	0.006	-7.41	6.89178053789602e-09	3.77658888545635e-07	0.262	0.5575	down
OsTN11g000343	232	135	179	135	39	78	195	88	0.453	-1.141	0.00417047	0.0278473	0.1029	0.1152	down
OsTN11g000347	7	1	7	20	82	92	5	89	16.672	4.059	7.49988309062674e-08	3.07046372013361e-06	0.2713	0.1485	up
OsTN11g000349	362	257	122	2374	742	451	265	1162	4.383	2.132	4.28433725904545e-05	0.000667582	0.1781	0.1893	up
OsTN11g000370	28	34	18	2	5	0	31	3	0.096	-3.382	9.72986496645844e-05	0.00130266	0.3294	0.2319	down
OsTN11g000371	154	62	85	66	17	18	104	33	0.325	-1.621	5.99819692698085e-05	0.000871856	0.0938	0.1487	down
OsTN11g000373	1	0	0	67	19	18	0	34	73.269	6.195	2.6492898744895e-10	2.09639889433951e-08	0.2328	0.204	up
OsTN11g000374	0	0	0	7	2	2	0	4	31.01	4.955	0.00193908	0.0150026	0.4639	0.9782	up
OsTN11g000383	29	20	28	153	93	83	28	123	4.38	2.131	2.09972621457082e-07	7.54727014108531e-06	0.0927	0.1414	up
OsTN11g000398	21	2	8	2	0	0	10	0	0.076	-3.713	0.00359447	0.0246294	0.6498	0.4825	down
OsTN11g000415	50	14	43	240	45	53	37	105	2.857	1.514	0.000974717	0.00858423	0.1289	0.1614	up
OsTN11g000421	1	0	0	13	19	15	0	20	41.747	5.384	1.07873525471576e-06	3.10825251993982e-05	0.3247	0.281	up
OsTN11g000424	61	28	108	0	1	0	71	1	0.007	-7.156	6.08647217758303e-13	8.78066771904784e-11	0.2476	0.2143	down
OsTN11g000425	11	6	28	0	0	0	17	0	0.007	-7.068	1.43546619241608e-06	4.01608595548388e-05	0.4302	0.5571	down
OsTN11g000431	111	52	52	257	197	161	75	238	3.173	1.666	5.14362106834528e-05	0.000771434	0.1074	0.12	up
OsTN11g000439	215	116	308	1375	252	354	232	621	2.68	1.422	0.00164042	0.0131326	0.1386	0.161	up
OsTN11g000444	1040	569	658	279	286	347	803	374	0.465	-1.104	0.00498482	0.0318647	0.1065	0.1709	down
OsTN11g000476	179	216	131	385	423	375	200	484	2.422	1.276	0.00198847	0.0152843	0.1151	0.157	up
OsTN11g000477	20	13	6	81	32	41	14	55	3.949	1.981	0.000446354	0.00453997	0.1747	0.2008	up
OsTN11g000483	28	99	33	0	1	11	67	6	0.082	-3.607	0.00240889	0.0178397	0.7658	0.2183	down
OsTN11g000500	56	21	55	26	0	5	46	9	0.204	-2.296	0.000354162	0.00375912	0.2257	0.2052	down
OsTN11g000518	3813	985	1692	13770	5251	3514	2148	7642	3.556	1.83	2.54334774196557e-06	6.47190992258148e-05	0.1022	0.1384	up
OsTN11g000525	2	1	2	11	70	18	2	48	24.63	4.622	6.06605901668417e-06	0.000135129	0.4471	0.204	up
OsTN11g000543	223	122	235	49	31	36	209	44	0.21	-2.249	1.86414413903923e-09	1.18065745960637e-07	0.0796	0.115	down
OsTN11g000556	17	5	14	64	33	40	12	51	3.984	1.994	1.75377712053227e-05	0.000322012	0.1024	0.2032	up
OsTN11g000560	8	4	2	18	21	20	5	24	4.79	2.26	0.000778261	0.00716034	0.2017	0.2077	up
OsTN11g000566	0	0	0	10	9	20	0	16	128.034	7	1.71232610172523e-07	6.28257779226416e-06	0.3023	0.4941	up
OsTN11g000567	4	1	0	14	37	20	1	32	17.603	4.138	6.75787514434881e-05	0.000963781	0.4755	0.2209	up
OsTN11g000574	14	10	0	46	37	20	8	39	4.586	2.197	0.00029669	0.00325331	0.1852	0.2028	up
OsTN11g000582	21	37	14	79	29	75	28	68	2.447	1.291	0.00752519	0.0437224	0.1361	0.1797	up
OsTN11g000600	124	91	165	26	10	36	140	28	0.197	-2.342	4.6047628088481e-07	1.50004923021877e-05	0.1219	0.1452	down
OsTN11g000620	1096	480	927	373	202	392	881	373	0.423	-1.241	0.00293721	0.0209587	0.1197	0.1821	down
OsTN11g000644	42	22	37	14	10	3	36	10	0.275	-1.86	0.000790171	0.00725491	0.149	0.205	down
OsTN11g000645	25	28	26	1	0	4	30	2	0.068	-3.884	2.08092983125239e-07	7.49240728885729e-06	0.1851	0.2208	down
OsTN11g000662	190	106	228	85	44	36	190	60	0.315	-1.665	3.69380702734106e-05	0.000593894	0.1005	0.1171	down
OsTN11g000674	5	0	3	6	16	19	3	18	6.481	2.696	0.00411052	0.027499	0.4259	0.367	up
OsTN11g000684	815	652	706	109	23	358	799	201	0.251	-1.995	0.00152922	0.0124349	0.2623	0.161	down
OsTN11g000709	42	29	33	152	84	38	38	98	2.594	1.375	0.000587647	0.00571662	0.0928	0.1452	up
OsTN11g000736	93	145	97	16	21	25	131	26	0.197	-2.341	3.28220075759279e-05	0.000539579	0.1858	0.1716	down
OsTN11g000737	34	22	37	9	10	2	34	8	0.24	-2.06	0.00165234	0.0131951	0.2171	0.2287	down
OsTN11g000748	30	17	24	8	7	3	25	7	0.268	-1.898	0.00162269	0.0130153	0.1606	0.2322	down
OsTN11g000752	0	0	0	2	3	41	0	21	165.306	7.369	8.6780625556941e-05	0.00118351	1.0294	0.1851	up
OsTN11g000753	149	51	133	18	18	31	116	28	0.236	-2.081	0.000332838	0.00357031	0.2025	0.13	down
OsTN11g000754	215	227	195	661	201	1349	240	876	3.654	1.869	0.000437747	0.00446527	0.1884	0.1694	up
OsTN11g000764	1	1	0	14	44	58	1	53	62.445	5.965	2.8959413628242e-06	7.21671310004851e-05	0.6066	0.221	up
OsTN11g000771	41	30	60	16	1	4	48	6	0.136	-2.879	0.00348235	0.0240555	0.5561	0.2193	down
OsTN11g000792	18	31	1	0	0	0	20	0	0.006	-7.301	0.000147823	0.00182435	1.0878	0.7242	down
OsTN11g000803	822	523	432	4696	3946	1624	634	3931	6.197	2.632	3.15659394450216e-06	7.7658802530229e-05	0.2029	0.17	up
OsTN11g000804	173	116	86	1208	448	268	134	645	4.807	2.265	7.62973509741692e-06	0.000162617	0.1645	0.1609	up
OsTN11g000805	137	46	42	615	114	83	75	245	3.262	1.706	0.000166925	0.00202353	0.1326	0.1174	up
OsTN11g000814	76	46	43	23	0	14	59	12	0.212	-2.235	0.000117695	0.00151637	0.1833	0.2015	down
OsTN11g000857	63	0	43	0	1	0	34	1	0.017	-5.903	0.00588604	0.0363498	1.9555	0.2549	down
OsTN11g000881	239	116	219	62	19	50	204	47	0.233	-2.099	0.000246209	0.00277879	0.2064	0.1293	down
OsTN11g000887	75	49	94	15	15	23	80	22	0.27	-1.89	0.000996536	0.00874371	0.1932	0.1652	down
OsTN11g000888	214	249	382	42	67	123	323	101	0.311	-1.685	0.000913298	0.00813416	0.1693	0.1162	down
OsTN11g000898	47	7	12	145	161	96	21	163	7.581	2.922	6.9595698250853e-08	2.86585625787542e-06	0.1657	0.1225	up
OsTN11g000899	3	0	0	7	12	2	1	9	7.851	2.973	0.00599419	0.0368781	0.4403	0.5706	up
OsTN11g000913	89	35	37	163	80	165	55	156	2.816	1.494	0.000302218	0.00329397	0.1062	0.129	up
OsTN11g000914	339	326	408	695	585	1404	403	1111	2.759	1.464	0.0043269	0.0286573	0.1804	0.1858	up
OsTN11g000922	156	101	70	31	31	37	116	40	0.342	-1.549	0.000611907	0.00590599	0.1229	0.1531	down
OsTN11g000924	11	0	12	0	0	1	8	0	0.066	-3.927	0.00704803	0.0416431	0.7803	0.9689	down
OsTN11g000926	475	178	260	96	91	106	313	119	0.377	-1.406	0.00115537	0.0098441	0.1235	0.1243	down
OsTN11g000928	35	0	50	0	0	1	29	0	0.018	-5.829	2.06551241116857e-05	0.000369025	0.632	0.2124	down
OsTN11g000934	3	0	0	10	59	43	1	53	47.178	5.56	1.23771192171888e-07	4.70397073904879e-06	0.4114	0.2023	up
OsTN11g000941	2	5	1	23	104	38	3	77	24.017	4.586	4.01248825501663e-06	9.50560641659218e-05	0.4555	0.1972	up
OsTN11g000944	2677	1622	907	7665	3162	2359	1832	4563	2.49	1.316	0.000402858	0.00417697	0.096	0.1516	up
OsTN11g000958	94	207	59	26	29	25	145	33	0.224	-2.157	8.18425595680318e-05	0.00112704	0.1803	0.1357	down
OsTN11g000984	0	0	0	1	18	2	0	11	82.575	6.368	0.000151631	0.00186631	0.7036	0.2857	up
OsTN11g000992	11	4	8	48	22	12	8	28	3.513	1.813	0.00863887	0.048594	0.2558	0.2063	up
OsTN11g001010	27	17	13	4	0	3	20	2	0.126	-2.992	0.00117212	0.00996276	0.3893	0.3346	down
OsTN11g001038	150	18	72	0	2	2	77	2	0.023	-5.444	3.30230312655004e-08	1.46713012444464e-06	0.3727	0.1966	down
OsTN11g001039	43	30	26	15	1	0	36	4	0.135	-2.89	0.000468209	0.00471029	0.3579	0.2211	down
OsTN11g001062	59	32	38	33	6	9	46	15	0.349	-1.52	0.00192685	0.0149297	0.1269	0.2028	down
OsTN11g001063	624	742	600	259	210	253	748	287	0.383	-1.384	0.00505657	0.0322413	0.1666	0.1748	down
OsTN11g001064	123	82	76	64	24	27	101	40	0.401	-1.318	0.00133712	0.011081	0.1	0.1652	down
OsTN11g001066	101	62	44	66	11	18	73	30	0.42	-1.251	0.00445425	0.0292994	0.113	0.1803	down
OsTN11g001112	62	42	48	1	2	12	55	7	0.114	-3.134	2.78333588304359e-07	9.64480458687997e-06	0.164	0.2035	down
OsTN11g001146	12	12	10	61	28	42	13	48	3.814	1.931	0.00253853	0.0186666	0.231	0.2034	up
OsTN11g001206	258	197	149	124	45	69	219	85	0.387	-1.37	0.0002519	0.00283247	0.0889	0.1156	down
OsTN11g001233	26	28	18	142	321	203	27	295	10.9	3.446	2.90536505585027e-09	1.75538680169278e-07	0.1872	0.1484	up
OsTN11g001275	0	0	0	1	0	12	0	6	45.336	5.503	0.00129662	0.010796	0.7184	0.2205	up
OsTN11g001287	25	11	16	6	2	5	18	5	0.265	-1.915	0.0033731	0.0234921	0.175	0.3155	down
OsTN11g001290	10	1	1	20	8	13	3	15	3.688	1.883	0.00717418	0.0422602	0.2058	0.3605	up
OsTN11g001358	17	7	2	1	0	0	9	0	0.051	-4.289	0.00469172	0.0304832	0.8801	0.5182	down
OsTN11g001360	12	18	4	124	53	55	13	82	6.362	2.669	2.07334761437259e-05	0.0003701	0.2159	0.1535	up
OsTN11g001363	274	169	136	1024	286	341	206	550	2.674	1.419	0.000237832	0.00269572	0.1001	0.1678	up
OsTN11g001370	232	310	187	17	9	33	280	24	0.084	-3.568	2.20270803175832e-08	1.02891694338103e-06	0.2237	0.115	down
OsTN11g001371	43	34	21	9	0	2	36	3	0.105	-3.246	4.16965994378107e-07	1.37094540198085e-05	0.1637	0.2082	down
OsTN11g001384	0	0	0	1	0	10	0	5	38.224	5.256	0.00267783	0.0194682	0.7837	0.2361	up
OsTN11g001402	22	16	33	102	220	66	26	170	6.435	2.686	3.11065547994841e-05	0.000518206	0.2473	0.1152	up
OsTN11g001403	0	1	0	17	7	5	0	10	20.613	4.366	0.000153422	0.00188289	0.3468	0.2273	up
OsTN11g001404	1	5	3	20	57	3	4	36	9.761	3.287	0.00017158	0.00206979	0.3641	0.2096	up
OsTN11g001418	8	3	12	54	29	14	8	35	4.136	2.048	0.000244984	0.00276644	0.1458	0.2033	up
OsTN11g001422	0	0	0	2	9	171	0	83	662.528	9.372	1.49723983624218e-07	5.59999386370156e-06	0.8166	0.2191	up
OsTN11g001430	0	0	0	1	0	829	0	377	3014.46	11.558	1.75485620307543e-07	6.40537616155262e-06	1.2482	0.16	up
OsTN11g001432	3	6	1	35	15	2865	4	1318	326.672	8.352	2.47678581258299e-06	6.32833695511416e-05	1.1678	0.142	up
OsTN11g001443	0	0	0	0	2	6	0	4	29.228	4.869	0.0041906	0.0279202	0.623	0.4624	up
OsTN11g001473	16	6	20	1	1	2	15	2	0.111	-3.171	0.00202326	0.0155124	0.4388	0.5628	down
OsTN11g001486	22	17	15	6	5	2	20	5	0.251	-1.995	0.00587987	0.0363321	0.2411	0.216	down
OsTN11g001488	451	42	579	62	66	36	367	66	0.178	-2.488	0.000105493	0.00139129	0.2579	0.1164	down
OsTN11g001504	124	96	125	32	4	14	127	16	0.132	-2.921	2.36540024589456e-07	8.37446461013122e-06	0.1759	0.1424	down
OsTN11g001505	66	25	55	135	60	102	51	110	2.146	1.102	0.00672629	0.0400799	0.1015	0.1402	up
OsTN11g001510	32	35	32	9	5	13	37	11	0.284	-1.818	0.00673053	0.0400827	0.247	0.2099	down
OsTN11g001511	110	114	130	60	45	43	133	58	0.428	-1.226	0.000829423	0.00752334	0.0802	0.1315	down
OsTN11g001513	63	36	19	23	8	13	41	16	0.383	-1.385	0.00198003	0.015225	0.0963	0.2034	down
OsTN11g001546	84	41	44	32	5	19	59	19	0.328	-1.606	0.00108322	0.00935719	0.1339	0.1941	down
OsTN11g001554	359	74	155	98	51	33	192	65	0.339	-1.561	0.000590207	0.00573244	0.132	0.1182	down
OsTN11g001557	0	5	2	12	122	84	3	105	34.599	5.113	3.63685669422788e-05	0.000586962	0.7103	0.1731	up
OsTN11g001561	199	137	200	353	474	181	196	416	2.119	1.083	0.00751819	0.0437078	0.1115	0.141	up
OsTN11g001562	117	52	58	237	166	77	79	179	2.262	1.178	0.00170044	0.013501	0.0894	0.1198	up
OsTN11g001578	1	1	1	5	4	32	1	18	14.574	3.865	0.00136985	0.0113213	0.6319	0.2046	up
OsTN11g001579	3	3	2	12	9	319	3	153	49.664	5.634	2.07501555799493e-05	0.0003701	0.7938	0.1195	up
OsTN11g001581	214	115	165	139	46	29	176	71	0.407	-1.296	0.000197321	0.00232219	0.0748	0.115	down
OsTN11g001585	9	0	28	20	15	165	13	88	6.479	2.696	0.00476043	0.0307882	0.5497	0.2033	up
OsTN11g001610	68	54	232	1	0	3	134	2	0.012	-6.361	3.04110393618609e-13	4.74210964519842e-11	0.2609	0.1581	down
OsTN11g001628	36	28	63	10	3	5	47	6	0.137	-2.872	6.51074347404622e-05	0.000933559	0.2621	0.2048	down
OsTN11g001637	189	179	133	59	32	57	186	57	0.303	-1.721	1.85126284728432e-06	4.96958622814666e-05	0.0771	0.1171	down
OsTN11g001640	12	9	35	0	0	0	21	0	0.006	-7.401	8.45070506337711e-08	3.38798263964313e-06	0.3547	0.3914	down
OsTN11g001641	61	34	33	33	4	15	45	17	0.386	-1.374	0.00858506	0.0483697	0.1524	0.1975	down
OsTN11g001666	16	15	12	68	47	48	16	63	3.926	1.973	0.000341767	0.0036458	0.1681	0.2025	up
OsTN11g001669	31	1	3	314	230	57	10	222	20.811	4.379	1.06437781319306e-07	4.13411360519877e-06	0.3505	0.115	up
OsTN11g001678	68	24	49	5	16	19	49	18	0.356	-1.491	0.0070095	0.0414414	0.1695	0.2051	down
OsTN11g001694	17	5	2	2	0	0	8	0	0.097	-3.361	0.00473319	0.0306494	0.5142	0.7177	down
OsTN11g001730	10	5	3	42	7	26	6	25	4.048	2.017	0.00285629	0.0204847	0.2269	0.2182	up
OsTN11g001770	395	148	369	1189	519	401	320	739	2.31	1.208	0.00223849	0.016822	0.1071	0.1798	up
OsTN11g001772	208	68	243	107	56	65	182	85	0.461	-1.117	0.00266371	0.0193988	0.088	0.1191	down
OsTN11g001779	0	0	0	4	2	20	0	11	88.51	6.468	9.50622874106023e-05	0.00127756	0.676	0.214	up
OsTN11g001780	517	150	324	1334	403	379	336	702	2.09	1.063	0.00782579	0.045086	0.1105	0.182	up
OsTN11g001785	80	95	24	450	123	216	75	270	3.618	1.855	3.57695964005451e-05	0.000578175	0.1281	0.1197	up
OsTN11g001789	702	348	572	385	170	143	575	246	0.429	-1.222	0.0026369	0.0192432	0.1126	0.1826	down
OsTN11g001808	5	4	2	29	27	25	4	33	7.883	2.979	2.83228416265401e-06	7.07470556388734e-05	0.1597	0.2092	up
OsTN11g001817	2	7	10	776	1142	496	8	1010	133.71	7.063	3.84416405028924e-16	1.07267351334847e-13	0.2999	0.161	up
OsTN11g001822	57	110	55	16	2	33	88	20	0.226	-2.145	0.000668958	0.0063333	0.2353	0.1936	down
OsTN11g001826	76	37	58	0	1	2	61	2	0.021	-5.569	4.67682338883208e-13	6.93719152391787e-11	0.1699	0.1962	down
OsTN11g001854	9	187	24	0	1	1	99	1	0.01	-6.689	2.93703535434819e-06	7.30108490837677e-05	0.761	0.2215	down
OsTN11g001855	12	17	70	0	1	2	39	2	0.037	-4.745	0.00308479	0.0218453	1.2072	0.3477	down
OsTN11g001900	357	125	155	0	0	0	215	0	0.001	-10.753	3.61204335231409e-33	2.55335344575083e-29	0.1147	0.1194	down
OsTN11g001914	0	0	0	0	0	21	0	10	76.349	6.255	0.0011134	0.00955631	1.1511	0.1159	up
OsTN11g001931	24	45	4	1	1	2	29	2	0.059	-4.089	0.00107176	0.00927711	0.7234	0.3252	down
OsTN11g001938	4	9	1	0	0	0	6	0	0.022	-5.513	0.00789645	0.0453309	1.5386	2.2892	down
OsTN11g001960	0	0	0	0	4	50	0	25	198.268	7.631	5.34967336459218e-05	0.000797824	1.0371	0.186	up
OsTN11g001973	45	75	33	11	1	13	60	9	0.155	-2.694	0.000106147	0.00139905	0.2592	0.2032	down
OsTN11g002005	4	8	0	181	41	108	5	114	24.844	4.635	1.85496655039224e-13	2.95776508527581e-11	0.162	0.1533	up
OsTN11g002013	139	54	205	106	13	28	143	45	0.321	-1.641	0.00341883	0.0237326	0.2027	0.1237	down
OsTN11g002019	316	646	367	807	862	1644	530	1392	2.63	1.395	0.00575887	0.035762	0.1758	0.1878	up
OsTN11g002020	168	144	158	629	203	621	174	539	3.099	1.632	4.79261066752818e-05	0.000726497	0.1067	0.1493	up
OsTN11g002029	248	109	143	134	39	20	173	61	0.361	-1.471	0.000188943	0.00224351	0.0971	0.115	down
OsTN11g002031	1	1	4	13	61	16	2	42	17.835	4.157	4.36599190618437e-06	0.000102083	0.3492	0.204	up
OsTN11g002054	6	7	10	1	0	1	9	1	0.096	-3.383	0.00364898	0.0249224	0.4736	0.606	down
OsTN11g002065	322	622	226	43	37	27	465	42	0.09	-3.47	0.000603923	0.00584812	0.5993	0.1398	down
OsTN11g002073	1160	798	1329	2522	3286	5473	1203	4814	3.999	2	1.77348191558973e-05	0.000325067	0.1449	0.1581	up
OsTN11g002097	123	99	78	2102	861	432	110	1150	10.492	3.391	1.71659186001993e-12	2.21974168142943e-10	0.1349	0.1877	up
OsTN11g002109	3	0	3	13	13	8	2	13	6.115	2.612	0.00502419	0.0320654	0.3771	0.2849	up
OsTN11g002117	891	585	638	331	132	169	762	225	0.296	-1.757	6.9465321040128e-07	2.13191181374529e-05	0.0824	0.171	down
OsTN11g002118	4028	5663	3742	1015	1183	1198	5186	1408	0.271	-1.882	1.41604187471086e-05	0.000269569	0.1263	0.1629	down
OsTN11g002120	95	19	550	46	2	1	249	12	0.052	-4.258	0.000809071	0.00736393	0.8787	0.1715	down
OsTN11g002122	4	0	15	0	0	0	7	0	0.018	-5.82	0.00857915	0.0483621	1.8891	2.0115	down
OsTN11g002146	141	28	219	73	34	32	136	50	0.365	-1.453	0.0026817	0.0194896	0.1486	0.1549	down
OsTN11g002178	12	0	2	0	0	0	4	0	0.029	-5.119	0.00457341	0.0298834	0.8992	1.2259	down
OsTN11g002179	809	473	485	3	6	72	628	36	0.058	-4.109	1.79006045262709e-05	0.000327822	0.5045	0.1418	down
OsTN11g002195	24	9	39	6	0	2	26	2	0.102	-3.291	0.00545122	0.0342024	0.741	0.3457	down
OsTN11g002200	8	4	2	28	25	32	5	34	6.813	2.768	9.1742439455717e-05	0.00123765	0.237	0.2372	up
OsTN11g002202	18	31	7	76	98	24	22	80	3.677	1.878	0.00403781	0.0271056	0.26	0.1917	up
OsTN11g002228	45	26	50	39	4	14	44	18	0.43	-1.217	0.00785627	0.0451757	0.1101	0.1962	down
OsTN11g002235	5	0	7	35	21	36	4	36	8.165	3.029	5.9519302800145e-07	1.87552132909759e-05	0.1451	0.2036	up
OsTN11g002238	0	0	0	31	3	0	0	9	74.904	6.227	0.00126883	0.0106021	1.197	1.5425	up
OsTN11g002247	91	39	62	247	66	148	67	161	2.399	1.263	0.00164311	0.0131455	0.102	0.1242	up
OsTN11g002263	31	20	19	95	57	43	25	72	2.861	1.516	0.000239222	0.00270859	0.0914	0.1732	up
OsTN11g002285	4	4	2	29	8	55	4	36	9.585	3.261	3.68479804078395e-05	0.000592895	0.288	0.2239	up
OsTN11g002296	51	10	15	183	90	56	24	116	4.675	2.225	3.50262259580799e-05	0.00056876	0.1716	0.1322	up
OsTN11g002366	15	9	27	69	32	41	19	52	2.767	1.468	0.00279166	0.0201438	0.1313	0.1931	up
OsTN11g002372	9	9	0	83	12	6	7	29	4.448	2.153	0.00755667	0.0438487	0.3589	0.2068	up
OsTN11g002379	21	9	5	167	52	23	12	78	6.468	2.693	4.86297107820975e-05	0.000735585	0.2461	0.1622	up
OsTN11g002388	78	30	61	32	3	22	59	19	0.333	-1.585	0.00495928	0.0317584	0.1875	0.2021	down
OsTN11g002391	470	305	365	64	76	175	411	135	0.326	-1.617	0.00283968	0.0203949	0.196	0.1238	down
OsTN11g002407	0	0	0	138	49	24	0	70	561.636	9.133	5.72856490567856e-19	2.96306526718842e-16	0.1555	0.186	up
OsTN11g002411	14	26	20	0	4	4	23	4	0.155	-2.689	0.00495876	0.0317584	0.4541	0.2909	down
OsTN11g002416	75	63	44	8	4	18	67	12	0.182	-2.458	0.00627496	0.0381298	0.4836	0.2049	down
OsTN11g002420	23	8	21	0	0	0	18	0	0.007	-7.193	0.000122487	0.00156481	1.0054	0.9215	down
OsTN11g002423	474	179	446	57	33	6	385	34	0.088	-3.511	0.000133395	0.00167589	0.49	0.1151	down
OsTN11g002425	3	2	1	25	33	11	2	28	12.401	3.632	1.36446537844757e-05	0.000261393	0.2815	0.2458	up
OsTN11g002429	31	35	9	13	1	4	28	5	0.213	-2.234	0.00258141	0.0188924	0.2846	0.226	down
OsTN11g002439	23	15	22	40	47	67	22	65	2.935	1.553	0.00453858	0.0297342	0.176	0.1727	up
OsTN11g002482	3	0	0	33	20	0	1	19	17.305	4.113	0.00231638	0.0173031	0.8412	0.2184	up
OsTN11g002513	51	59	47	572	130	125	59	262	4.435	2.149	1.88004131389802e-06	5.03204153407522e-05	0.1256	0.1266	up
OsTN11g002523	140	152	71	1	0	26	136	12	0.088	-3.512	0.000450018	0.00456919	0.562	0.1433	down
OsTN11g002540	62	47	16	9	4	1	45	4	0.109	-3.196	0.00165751	0.0132196	0.5598	0.2368	down
OsTN11g002579	169	215	1061	0	1	21	560	10	0.018	-5.795	0.000730549	0.00680438	1.3845	0.123	down
OsTN11g002580	11	6	6	0	0	0	8	0	0.015	-6.043	0.000326826	0.00350937	0.6815	1.0713	down
OsTN11g002581	20	19	19	0	0	6	22	3	0.123	-3.018	0.00782489	0.045086	0.6522	0.5391	down
OsTN11g002601	1092	863	1561	291	238	379	1306	366	0.28	-1.835	4.34102362901907e-05	0.000672773	0.1345	0.1893	down
OsTN11g002603	29	46	15	1	8	7	35	8	0.205	-2.288	0.00237439	0.0176494	0.2933	0.2176	down
OsTN11g002605	78	31	51	37	12	20	55	24	0.441	-1.183	0.00699347	0.0413698	0.1051	0.1948	down
OsTN11g002610	2814	900	1027	24888	9812	5993	1580	13818	8.744	3.128	6.54659366209061e-12	7.46417267698686e-10	0.1268	0.1253	up
OsTN11g002614	6	8	16	59	19	35	12	40	3.511	1.812	0.00239696	0.017786	0.1901	0.2033	up
OsTN12g000008	77	21	77	16	4	0	60	6	0.107	-3.23	9.6597272452363e-06	0.000195099	0.273	0.2034	down
OsTN12g000032	26	31	23	1	3	4	30	4	0.113	-3.144	0.000397707	0.00413237	0.3682	0.2181	down
OsTN12g000037	66	27	43	219	63	40	47	104	2.204	1.14	0.00289099	0.0206706	0.0878	0.1518	up
OsTN12g000043	298	603	261	2077	1881	849	463	1869	4.038	2.014	0.000293092	0.00322051	0.2055	0.1863	up
OsTN12g000045	52	72	28	1141	350	184	59	540	9.282	3.214	2.5392906739653e-08	1.1677158338884e-06	0.1956	0.1581	up
OsTN12g000050	54	28	39	136	103	61	43	114	2.646	1.404	0.000940318	0.00831928	0.109	0.153	up
OsTN12g000053	112	64	125	364	87	269	109	255	2.344	1.229	0.00340568	0.0236568	0.1166	0.1167	up
OsTN12g000055	2	1	1	129	104	21	1	95	61.431	5.941	4.09983335520225e-14	7.76296124676554e-12	0.2037	0.1535	up
OsTN12g000065	0	0	0	3	4	1	0	3	26	4.7	0.00524906	0.0331794	0.5789	0.6379	up
OsTN12g000068	3	0	3	9	9	16	2	14	6.315	2.659	0.00236423	0.0176047	0.3105	0.2746	up
OsTN12g000070	5	10	3	28	64	23	7	51	7.166	2.841	3.13099267693721e-05	0.000520169	0.2313	0.2032	up
OsTN12g000083	90	26	36	19	10	16	50	17	0.331	-1.596	0.000481628	0.00482734	0.1054	0.2022	down
OsTN12g000114	0	0	0	0	7	118	0	57	458.295	8.84	3.95061950385032e-05	0.000628513	1.3903	0.1181	up
OsTN12g000118	46	99	53	19	16	3	79	14	0.18	-2.47	4.54839553824625e-05	0.000697823	0.2022	0.2017	down
OsTN12g000123	206	92	103	23	3	20	139	16	0.119	-3.074	4.79202224086142e-10	3.56576897059467e-08	0.1265	0.1921	down
OsTN12g000168	43	7	25	11	4	7	25	8	0.32	-1.644	0.00488568	0.0314162	0.1588	0.2074	down
OsTN12g000171	2	1	3	10	16	15	2	17	7.507	2.908	0.000180476	0.00215504	0.2139	0.2047	up
OsTN12g000185	57	35	54	19	11	8	53	14	0.265	-1.918	8.21211230290369e-05	0.00112794	0.1183	0.2032	down
OsTN12g000186	99	139	112	24	13	28	135	25	0.186	-2.429	1.3017668416238e-07	4.92095711413829e-06	0.1166	0.1521	down
OsTN12g000189	778	608	1200	1435	1801	3321	961	2797	2.908	1.54	0.0021261	0.016126	0.1724	0.1782	up
OsTN12g000192	25	20	3	488	112	85	17	214	12.445	3.638	6.74768110160674e-11	6.27623127727079e-09	0.1633	0.1152	up
OsTN12g000193	193	484	54	1808	1604	946	299	1704	5.71	2.513	0.000162926	0.00198459	0.2847	0.1872	up
OsTN12g000194	10	1	4	44	13	8	5	21	4.182	2.064	0.00364588	0.0249092	0.2441	0.2197	up
OsTN12g000195	346	204	236	122	83	129	280	131	0.466	-1.101	0.00737604	0.0431513	0.1126	0.12	down
OsTN12g000203	22	27	10	177	34	27	23	73	3.32	1.731	0.000675014	0.0063764	0.1496	0.1679	up
OsTN12g000212	77	25	39	1	2	0	48	1	0.026	-5.285	1.75831635221713e-13	2.82489506677793e-11	0.1324	0.2144	down
OsTN12g000219	3	4	2	13	9	34	3	23	6.676	2.739	0.00284416	0.0204185	0.4167	0.4094	up
OsTN12g000223	885	198	708	262	80	76	608	139	0.23	-2.122	5.08652063272113e-05	0.000764634	0.1783	0.171	down
OsTN12g000237	66	135	53	19	15	24	101	24	0.228	-2.13	0.000364554	0.0038425	0.2116	0.1849	down
OsTN12g000249	42	66	63	3	2	1	67	2	0.035	-4.845	7.97846507464054e-14	1.40999424031585e-11	0.1347	0.2032	down
OsTN12g000282	54	31	12	3	7	5	34	7	0.189	-2.401	0.00369042	0.0251487	0.3649	0.2295	down
OsTN12g000289	70	64	29	34	14	19	60	24	0.406	-1.301	0.00283077	0.0203621	0.1026	0.1931	down
OsTN12g000294	13	49	30	6	6	4	38	6	0.168	-2.576	0.0029073	0.0207733	0.4058	0.2664	down
OsTN12g000316	4	2	0	30	23	10	2	24	10.701	3.42	9.55041960510399e-06	0.000193576	0.2211	0.2429	up
OsTN12g000351	95	71	67	418	119	118	85	216	2.558	1.355	0.000579678	0.00565207	0.0997	0.1151	up
OsTN12g000361	7	5	4	24	50	19	6	41	6.82	2.77	7.69493274344503e-05	0.00107333	0.2395	0.2035	up
OsTN12g000373	12	3	17	79	33	22	11	46	4.051	2.018	0.000286573	0.00315871	0.1614	0.2023	up
OsTN12g000393	55	15	21	128	35	37	30	66	2.169	1.117	0.00749825	0.0436615	0.0998	0.1687	up
OsTN12g000418	26	14	15	100	63	45	20	77	3.953	1.983	0.00029882	0.00326317	0.1736	0.1886	up
OsTN12g000424	49	16	27	11	0	3	31	4	0.141	-2.824	0.00432357	0.0286442	0.5401	0.2675	down
OsTN12g000425	19	13	10	90	51	38	15	65	4.323	2.112	8.07267686792831e-07	2.43177923775789e-05	0.0872	0.1812	up
OsTN12g000451	11	23	4	3	2	0	15	2	0.126	-2.984	0.00163011	0.01306	0.3673	0.3527	down
OsTN12g000469	6	8	13	79	18	47	10	50	4.883	2.288	5.48001614996361e-05	0.000810136	0.1626	0.2037	up
OsTN12g000527	8	1	2	0	0	0	3	0	0.034	-4.868	0.00753823	0.043778	0.9234	0.6952	down
OsTN12g000530	14	14	8	0	0	0	13	0	0.009	-6.754	0.000104693	0.00138245	0.7934	1.0454	down
OsTN12g000543	20	14	23	2	0	3	21	2	0.094	-3.415	0.00787038	0.0452201	0.8357	0.7253	down
OsTN12g000580	107	54	69	67	12	24	81	33	0.421	-1.248	0.00401394	0.0269712	0.1113	0.1706	down
OsTN12g000594	78	70	69	43	0	21	81	20	0.257	-1.961	0.000523352	0.00517182	0.1893	0.1769	down
OsTN12g000595	63	36	50	14	2	23	53	15	0.278	-1.848	0.000433633	0.00443826	0.1461	0.173	down
OsTN12g000634	25	11	7	251	56	31	14	103	7.006	2.809	1.00652883718723e-06	2.94826754837424e-05	0.1813	0.1693	up
OsTN12g000643	22	16	18	4	4	2	20	4	0.192	-2.382	0.00483066	0.0311595	0.3437	0.2156	down
OsTN12g000656	215	279	193	619	799	675	263	874	3.319	1.731	0.00358878	0.0246063	0.2382	0.1892	up
OsTN12g000657	23	5	9	110	30	37	12	59	4.735	2.243	5.48027379016962e-05	0.000810136	0.1664	0.1626	up
OsTN12g000685	18	436	185	13294	7010	5982	281	9573	34.229	5.097	2.0473040260463e-11	2.13877716652039e-09	0.2935	0.1459	up
OsTN12g000688	46	21	25	121	40	53	32	74	2.308	1.207	0.0063636	0.0385245	0.115	0.1742	up
OsTN12g000690	130	65	91	1431	399	95	101	594	5.89	2.558	4.29848984148772e-06	0.000100727	0.1946	0.1672	up
OsTN12g000692	42	31	8	289	85	97	29	158	5.478	2.454	1.07073404981135e-08	5.52294862569233e-07	0.103	0.1258	up
OsTN12g000722	13	0	8	148	56	0	7	65	9.337	3.223	0.000502119	0.00499457	0.4776	0.1755	up
OsTN12g000752	76	39	18	10	6	2	46	6	0.143	-2.806	1.01631704546562e-06	2.97283249423302e-05	0.1452	0.2015	down
OsTN12g000787	1	0	0	1	0	21	0	10	21.657	4.437	0.00683112	0.0405678	1.1159	0.4421	up
OsTN12g000791	177	66	138	70	21	21	132	37	0.285	-1.809	0.000229595	0.00262057	0.1482	0.1567	down
OsTN12g000815	19	29	55	1	2	5	40	4	0.087	-3.53	0.000664948	0.00629815	0.5366	0.2571	down
OsTN12g000821	143	120	96	44	9	20	132	24	0.188	-2.414	0.00012863	0.00163183	0.2392	0.1167	down
OsTN12g000850	0	5	2	41	7	20	3	22	7.979	2.996	0.000203732	0.00236635	0.2726	0.2076	up
OsTN12g000851	137	175	202	826	109	950	197	686	3.481	1.799	0.00162908	0.0130566	0.2181	0.1655	up
OsTN12g000865	1584	1048	948	719	255	530	1286	546	0.425	-1.234	0.000967527	0.00853896	0.0965	0.1893	down
OsTN12g000872	22	11	12	46	26	106	16	73	4.548	2.185	0.000217384	0.00249462	0.1988	0.1792	up
OsTN12g000884	2	0	1	1	1	189	1	87	77.496	6.276	0.00019306	0.00228448	1.1949	0.1541	up
OsTN12g000889	17	12	14	53	20	32	16	38	2.421	1.276	0.00701709	0.0414747	0.1113	0.2045	up
OsTN12g000901	7	21	5	34	70	113	14	96	7.195	2.847	4.33907832738423e-05	0.000672773	0.2706	0.1751	up
OsTN12g000902	1	3	0	33	10	26	2	25	15.667	3.97	6.1551576952223e-07	1.93095309530443e-05	0.2043	0.2108	up
OsTN12g000933	18	4	7	1	1	1	10	1	0.128	-2.969	0.00291808	0.0208362	0.3407	0.8153	down
OsTN12g000938	42	30	5	1	3	0	27	2	0.063	-3.984	0.000270014	0.00300587	0.5166	0.3874	down
OsTN12g000948	147	101	49	364	224	282	106	333	3.137	1.65	7.10959355138628e-05	0.00100449	0.112	0.1219	up
OsTN12g000954	0	2	2	12	14	5	2	13	7.504	2.908	0.000818442	0.00743328	0.2449	0.2359	up
OsTN12g000968	3	0	4	0	0	0	2	0	0.049	-4.365	0.00657793	0.03948	0.3482	0.7479	down
OsTN12g000975	0	0	0	0	13	1	0	7	53.323	5.737	9.99055937701212e-05	0.00133274	0.3332	0.1489	up
OsTN12g000986	142	66	49	16	17	33	88	28	0.306	-1.706	0.000568496	0.0055558	0.1426	0.169	down
OsTN12g000991	413	125	235	125	40	52	261	75	0.286	-1.804	7.86750278474342e-06	0.000166513	0.1026	0.1194	down
OsTN12g001005	5	4	4	0	0	0	5	0	0.026	-5.276	0.000448126	0.00455363	0.3206	0.4871	down
OsTN12g001020	794	1631	552	129	150	233	1190	215	0.181	-2.469	7.51471660731372e-06	0.000160488	0.1939	0.1859	down
OsTN12g001021	490	388	203	112	43	72	393	82	0.21	-2.254	1.25166375122014e-09	8.2950103662892e-08	0.084	0.1348	down
OsTN12g001037	42	23	22	3	1	4	31	3	0.101	-3.306	6.51926619521693e-05	0.000934149	0.3034	0.2606	down
OsTN12g001059	8	8	8	72	24	20	9	39	4.42	2.144	7.27932197408684e-05	0.00102573	0.1365	0.2012	up
OsTN12g001080	70	17	60	39	8	14	50	20	0.406	-1.301	0.00875319	0.0490562	0.139	0.1989	down
OsTN12g001114	25	37	2	225	77	51	25	117	4.806	2.265	0.000182136	0.0021712	0.2194	0.1423	up
OsTN12g001128	235	126	174	103	35	20	190	52	0.278	-1.847	1.07709949047272e-05	0.000214883	0.1082	0.1154	down
OsTN12g001129	59	34	45	25	4	19	50	17	0.345	-1.537	0.00730002	0.0428248	0.1886	0.1978	down
OsTN12g001159	77	36	50	50	5	4	57	16	0.308	-1.7	0.0025565	0.0187533	0.1864	0.1967	down
OsTN12g001195	109	81	47	48	17	30	85	34	0.401	-1.319	0.00144663	0.0118634	0.0985	0.1803	down
OsTN12g001197	2	4	1	24	28	3	3	22	7.816	2.966	0.00233527	0.0174319	0.4552	0.2538	up
OsTN12g001229	238	145	82	1436	515	362	164	778	4.747	2.247	2.51957066640358e-07	8.86111693572483e-06	0.1218	0.179	up
OsTN12g001232	105	199	49	1151	1867	754	140	1598	11.421	3.514	3.11464762823131e-08	1.39941381889622e-06	0.2357	0.1882	up
OsTN12g001264	779	498	340	0	0	10	575	5	0.008	-7.027	4.79850384947863e-11	4.62553959708606e-09	0.4511	0.158	down
OsTN12g001265	6	17	1	0	0	0	10	0	0.013	-6.316	0.00280494	0.0202259	1.5476	0.93	down
OsTN12g001270	2	0	1	20	47	17	1	37	32.112	5.005	4.39222362627064e-06	0.000102471	0.4626	0.2191	up
OsTN12g001281	4	7	5	48	37	84	6	69	11.021	3.462	0.000183038	0.00218072	0.4555	0.2032	up
OsTN12g001304	41	29	77	21	4	1	55	7	0.152	-2.717	3.13224805969446e-05	0.000520169	0.223	0.2335	down
OsTN12g001339	24	13	13	87	54	13	17	55	3.1	1.632	0.00248552	0.0183213	0.165	0.2009	up
OsTN12g001345	46	60	30	17	11	15	52	16	0.319	-1.65	0.00234398	0.0174662	0.1613	0.2004	down
OsTN12g001386	38	25	13	2	0	6	27	3	0.118	-3.083	0.000128743	0.00163196	0.2818	0.2606	down
OsTN12g001396	0	0	0	2	2	4	0	3	26.069	4.704	0.00252146	0.018554	0.3138	0.2848	up
OsTN12g001410	215	79	168	324	355	316	160	407	2.529	1.339	0.002722	0.0197285	0.1344	0.1328	up
OsTN12g001421	2	0	0	9	45	15	1	32	41.279	5.367	1.70392749823131e-05	0.000315041	0.5917	0.2418	up
OsTN12g001422	0	0	0	1	9	0	0	5	38.966	5.284	0.00646158	0.0389418	1.2245	1.1184	up
OsTN12g001435	75	69	66	52	6	25	78	27	0.353	-1.502	0.00849123	0.0480672	0.2019	0.1798	down
OsTN12g001453	255	348	205	31	58	19	311	46	0.148	-2.756	5.6464317309414e-05	0.000830401	0.285	0.1233	down
OsTN12g001456	0	0	0	7	12	0	0	8	63.383	5.986	0.000714527	0.00668672	0.8535	0.8064	up
OsTN12g001461	0	0	0	1	2	4	0	3	23.733	4.569	0.00429727	0.0285383	0.3615	0.6951	up
OsTN12g001467	17	6	35	7	1	2	21	3	0.164	-2.604	0.00126207	0.0105498	0.302	0.2355	down
OsTN12g001499	9	5	5	0	0	0	7	0	0.018	-5.775	0.000272575	0.00302328	0.5098	0.8448	down
OsTN12g001512	45	33	29	16	2	9	39	9	0.243	-2.041	0.000290209	0.0031938	0.1561	0.2094	down
OsTN12g001532	289	231	169	76	7	66	252	52	0.208	-2.266	4.37326339976391e-06	0.000102141	0.1501	0.115	down
OsTN12g001533	2040	3650	2426	570	331	1104	3198	811	0.254	-1.979	0.000846241	0.00765298	0.235	0.1762	down
OsTN12g001538	66	23	13	259	101	77	33	150	4.393	2.135	2.55794338946776e-06	6.49656352819674e-05	0.1221	0.1183	up
OsTN12g001556	853	255	440	303	92	92	521	162	0.313	-1.675	2.72641953166132e-05	0.000463666	0.1052	0.1567	down
OsTN12g001562	62	94	62	19	18	23	85	24	0.286	-1.807	0.00258171	0.0188924	0.2168	0.1896	down
OsTN12g001565	4	4	1	14	10	16	3	16	4.647	2.216	0.00201853	0.0154817	0.1962	0.41	up
OsTN12g001585	57	26	28	83	107	38	38	93	2.388	1.256	0.00815916	0.0465764	0.1387	0.1525	up
OsTN12g001586	0	2	0	41	44	29	1	46	52.591	5.717	7.65747102296307e-11	6.91029736102034e-09	0.2166	0.2056	up
OsTN12g001596	26	1	24	121	56	60	17	86	4.982	2.317	0.00261935	0.0191349	0.3623	0.1865	up
OsTN12g001597	18	5	34	176	78	225	21	185	8.977	3.166	1.55586247267629e-07	5.78862727334142e-06	0.2045	0.1219	up
OsTN12g001603	195	113	56	35	6	11	127	16	0.136	-2.881	2.73286434851203e-08	1.24636245675042e-06	0.1453	0.1694	down
OsTN12g001613	39	34	28	126	53	76	38	92	2.489	1.316	0.00547352	0.034322	0.1372	0.1612	up
OsTN12g001617	153	6	76	889	261	160	74	422	5.676	2.505	3.99866046544555e-05	0.000632088	0.2344	0.1458	up
OsTN12g001636	135	86	225	7	16	46	164	31	0.186	-2.426	0.000692586	0.00651338	0.3139	0.1398	down
OsTN12g001640	5	8	9	23	211	83	9	154	18.01	4.171	8.45118506328672e-08	3.38798263964313e-06	0.3042	0.1688	up
OsTN12g001650	0	0	4	0	61	28	2	45	27.05	4.758	0.000865796	0.00778336	0.957	0.1155	up
OsTN12g001718	148	114	99	100	28	46	132	60	0.459	-1.124	0.00085114	0.00768745	0.0672	0.1282	down
OsTN12g001724	26	54	10	1	0	0	36	0	0.013	-6.244	1.96583882327834e-09	1.2370784547556e-07	0.2758	0.2231	down
OsTN12g001725	38	13	14	2	2	4	22	3	0.145	-2.784	0.000160973	0.00196305	0.2155	0.2841	down
OsTN12g001736	329	303	714	52	152	95	509	135	0.265	-1.919	0.000583863	0.00568241	0.2044	0.1384	down
OsTN12g001737	202	65	333	43	49	37	215	53	0.243	-2.042	2.58868916293317e-05	0.000444161	0.1456	0.1169	down
OsTN12g001759	19	6	9	0	0	2	11	1	0.081	-3.631	0.00776982	0.0448244	0.7987	1.1029	down
OsTN12g001773	0	0	0	7	0	6	0	4	36.884	5.205	0.00275328	0.0199145	0.7741	0.5181	up
OsTN12g001774	218	315	353	0	0	6	343	3	0.008	-7.016	1.70473535860088e-09	1.10220496188564e-07	0.5238	0.1152	down
OsTN12g001776	184	1804	207	33	10	25	971	25	0.025	-5.3	2.80561703491157e-08	1.2740625366032e-06	0.4462	0.1479	down
OsTN12g001781	322	216	232	21	12	63	278	40	0.142	-2.813	5.09711146252449e-07	1.62792835520718e-05	0.1854	0.1246	down
OsTN12g001782	2088	3271	2509	221	135	660	3067	423	0.138	-2.857	1.1011490562261e-05	0.000219063	0.2636	0.1872	down
OsTN12g001783	38	35	32	12	5	5	39	8	0.204	-2.293	0.000359819	0.00380258	0.2088	0.2176	down
OsTN12g001784	84	36	97	8	5	16	77	12	0.15	-2.739	1.392932618085e-05	0.000265647	0.2121	0.2054	down
OsTN12g001790	3	2	2	28	8	2	2	12	4.761	2.251	0.0016134	0.0129653	0.1647	0.2439	up
OsTN12g001838	8	2	2	326	57	49	4	130	31.119	4.96	1.12541110285064e-12	1.53978021020345e-10	0.2054	0.1316	up
OsTN12g001860	0	0	0	5	6	0	0	4	35.167	5.136	0.00872035	0.048911	1.2963	1.4985	up
OsTN12g001874	17	2	18	46	107	73	13	100	7.745	2.953	6.73669554374325e-06	0.000147588	0.2378	0.1249	up
OsTN12g001875	10	18	25	100	281	251	21	286	13.784	3.785	1.95721650185197e-08	9.26488623990507e-07	0.2462	0.1469	up
OsTN12g001889	67	21	44	31	3	14	45	15	0.353	-1.5	0.00549387	0.0344394	0.1632	0.2025	down
OsTN12g001892	408	144	149	135	37	45	235	72	0.31	-1.692	5.11012016962056e-06	0.000117284	0.0857	0.1166	down
OsTN12g001896	25	14	4	120	28	68	15	74	4.961	2.311	2.52178511658409e-05	0.000435501	0.1655	0.1975	up
OsTN12g001897	38	80	9	207	143	245	51	236	4.656	2.219	0.000142951	0.00177492	0.2134	0.1182	up
OsTN12g001950	843	939	858	93	95	131	1000	132	0.131	-2.933	1.35684383778098e-10	1.14639789911638e-08	0.1263	0.1861	down
OsTN12g001951	102	106	29	375	371	84	88	322	3.657	1.871	0.000459594	0.00464345	0.1856	0.1219	up
OsTN12g001996	15	9	5	56	12	18	10	28	2.768	1.469	0.00471713	0.0305729	0.1263	0.2085	up
OsTN12g002004	17	0	5	74	29	11	7	38	5.335	2.416	0.000221806	0.00254124	0.2205	0.2049	up
OsTN12g002028	20	0	33	117	119	67	18	121	6.509	2.702	0.000363202	0.00383206	0.3428	0.1348	up
OsTN12g002029	45	0	25	190	148	46	22	144	6.457	2.691	0.00288975	0.0206688	0.5022	0.1471	up
OsTN12g002034	0	0	4	29	45	0	2	31	18.611	4.218	0.000485973	0.00486363	0.6683	0.3119	up
OsTN12g002035	0	0	1	8	27	5	0	19	36.817	5.202	4.55080726118321e-05	0.000697823	0.5206	0.5901	up
OsTN12g002036	104	284	68	313	618	409	187	585	3.134	1.648	0.00597706	0.0368047	0.2422	0.1495	up
OsTN12g002038	4	3	7	31	53	28	5	48	9.033	3.175	8.70285849556502e-06	0.000179186	0.2423	0.1816	up
OsTN12g002043	79	50	56	66	7	18	67	28	0.435	-1.2	0.00721502	0.04242	0.116	0.1898	down
OsTN12g002044	8	14	6	54	37	50	11	55	5.085	2.346	0.000114762	0.0014849	0.1949	0.1661	up
OsTN12g002070	104	157	50	7	3	17	121	11	0.091	-3.464	0.000114443	0.00148349	0.4459	0.197	down
OsTN12g002071	4	4	1	30	15	4	3	17	5.056	2.338	0.00273601	0.0198097	0.2642	0.2302	up
OsTN12g002074	123	71	128	250	207	456	116	375	3.223	1.688	0.000144062	0.00178558	0.1293	0.1204	up
OsTN12g002075	0	0	0	7	1	15	0	9	72.671	6.183	0.000272317	0.00302199	0.7367	1.1078	up
OsTN12g002081	322	177	200	62	2	29	247	29	0.121	-3.05	1.41949704063508e-07	5.32093857887269e-06	0.1949	0.1153	down
OsTN12g002097	167	151	134	160	27	44	168	73	0.439	-1.188	0.0082269	0.0468874	0.1321	0.1155	down
OsTN12g002112	399	245	122	1432	455	458	270	789	2.929	1.55	9.14246938908549e-05	0.00123498	0.1057	0.1832	up
OsTN12g002121	0	0	0	5	6	2	0	5	41.456	5.374	0.000506496	0.00503575	0.4102	1.0867	up
OsTN12g002141	6	2	1	33	28	11	3	28	8.404	3.071	8.2799970847303e-07	2.48364778183699e-05	0.1334	0.2047	up
OsTN12g002172	112	66	204	1250	320	261	141	585	4.169	2.06	9.89899597881008e-06	0.000199551	0.141	0.1576	up
OsTN12g002199	30	19	25	2	0	2	27	1	0.058	-4.104	1.4020166511207e-05	0.000267139	0.344	0.2327	down
OsTN12g002200	2864	1442	2009	1429	505	542	2229	853	0.383	-1.385	6.06473770059401e-05	0.000880924	0.0821	0.1776	down
OsTN12g002209	5	0	1	47	10	32	2	31	14.767	3.884	2.3365925074335e-06	6.0282381149808e-05	0.2718	0.2149	up
OsTN12g002215	4	16	24	1	0	0	18	0	0.026	-5.238	3.35283963274746e-06	8.13543136060358e-05	0.3381	0.4643	down
OsTN12g002228	123	97	85	54	18	32	112	37	0.334	-1.582	5.73749293332405e-05	0.000840297	0.0885	0.1526	down
OsTN12g002231	228	96	254	97	59	84	205	92	0.447	-1.161	0.00491177	0.0315171	0.1109	0.1159	down
OsTN1g000013	14	4	4	36	16	16	7	24	3.219	1.687	0.00588008	0.0363321	0.1809	0.2274	up
OsTN1g000016	0	0	0	1	2	4	0	3	24.285	4.602	0.00669035	0.0399431	0.5829	0.867	up
OsTN1g000022	219	178	271	84	15	16	248	35	0.148	-2.757	8.20642158276912e-11	7.34318913526518e-09	0.1026	0.1218	down
OsTN1g000023	5086	1872	2454	390	178	147	3203	253	0.079	-3.659	6.42555933857322e-17	2.19785220795359e-14	0.1105	0.1783	down
OsTN1g000024	46	33	15	8	6	6	34	8	0.228	-2.132	0.000863306	0.00776426	0.2016	0.2061	down
OsTN1g000037	169	111	88	65	16	27	132	36	0.28	-1.837	3.238249408599e-05	0.000533594	0.1164	0.1493	down
OsTN1g000038	8	0	13	47	34	16	7	37	4.82	2.269	0.000114534	0.00148376	0.1637	0.1996	up
OsTN1g000043	2	2	7	28	9	18	4	20	4.686	2.228	0.0048436	0.0311929	0.2983	0.2644	up
OsTN1g000044	1	0	1	20	24	14	1	24	28.381	4.827	1.98328788698597e-06	5.24433743382935e-05	0.33	0.3462	up
OsTN1g000052	111	59	90	82	22	11	92	36	0.403	-1.311	0.00117319	0.00996786	0.0957	0.1497	down
OsTN1g000063	26	39	9	5	3	1	29	3	0.117	-3.094	0.000645233	0.00614434	0.3968	0.2818	down
OsTN1g000077	1	31	1	6	277	178	15	228	15.179	3.924	0.0032461	0.0227495	0.9913	0.1239	up
OsTN1g000082	0	0	0	0	0	12	0	5	43.405	5.44	0.00233861	0.0174384	0.8713	0.5204	up
OsTN1g000086	63	68	26	161	126	92	59	146	2.494	1.319	0.00204208	0.0156397	0.1148	0.129	up
OsTN1g000087	23	15	6	117	63	39	16	79	5.029	2.33	1.6518198984767e-06	4.5200186563865e-05	0.1238	0.1788	up
OsTN1g000090	86	40	49	2	0	1	61	1	0.019	-5.704	8.65113492707883e-10	5.91821349672776e-08	0.2928	0.2012	down
OsTN1g000093	109	53	40	168	236	146	70	230	3.28	1.714	0.000777738	0.00715864	0.1685	0.1278	up
OsTN1g000131	71	69	76	40	9	18	81	23	0.287	-1.799	1.76900622737353e-05	0.000324527	0.0937	0.1938	down
OsTN1g000136	73	40	34	238	95	61	52	135	2.603	1.38	0.00372416	0.0253216	0.1444	0.1217	up
OsTN1g000140	126	57	92	370	400	335	97	451	4.65	2.217	1.79008852185419e-06	4.83597545005883e-05	0.1367	0.1335	up
OsTN1g000141	232	200	323	740	1533	1347	282	1594	5.652	2.499	2.20685853298774e-05	0.000390007	0.2221	0.1879	up
OsTN1g000142	339	203	315	784	352	991	309	822	2.659	1.411	0.0011764	0.00997916	0.129	0.1771	up
OsTN1g000148	66	74	37	162	153	78	66	154	2.318	1.213	0.00370093	0.0252041	0.1106	0.145	up
OsTN1g000187	66	80	47	6	18	13	73	17	0.224	-2.158	0.00740464	0.0432948	0.3937	0.1914	down
OsTN1g000190	5	2	4	39	75	41	4	67	16.763	4.067	2.38632057417936e-05	0.000416859	0.4569	0.2077	up
OsTN1g000197	26	3	21	2	2	0	17	1	0.095	-3.397	0.00314314	0.0221852	0.6009	0.812	down
OsTN1g000204	388	275	111	96	36	42	276	61	0.222	-2.172	2.37119195448757e-07	8.38097796313632e-06	0.108	0.1209	down
OsTN1g000212	265	167	125	55	32	33	198	45	0.226	-2.147	8.07482038912505e-08	3.28680836837188e-06	0.0936	0.1318	down
OsTN1g000233	18	2	23	2	2	2	15	2	0.16	-2.642	0.00236822	0.017622	0.3083	0.3592	down
OsTN1g000234	110	44	71	20	3	22	78	16	0.211	-2.242	8.2944217933089e-06	0.000172959	0.1354	0.1952	down
OsTN1g000240	1	0	0	26	23	22	0	28	59.561	5.896	1.0473901325746e-08	5.4574944819434e-07	0.2672	0.2175	up
OsTN1g000244	171	80	74	20	10	13	112	16	0.141	-2.827	3.32979681386913e-12	4.03514291609843e-10	0.0768	0.1399	down
OsTN1g000246	156	74	111	3	8	23	120	15	0.124	-3.014	3.29948826017661e-06	8.03355310373884e-05	0.2296	0.1922	down
OsTN1g000247	0	0	0	1	4	17	0	10	79.136	6.306	5.48189598383868e-05	0.000810136	0.5243	0.4085	up
OsTN1g000251	316	175	152	947	343	246	226	518	2.291	1.196	0.0063331	0.0383951	0.1313	0.1709	up
OsTN1g000256	296	115	247	144	52	92	230	103	0.45	-1.15	0.000747316	0.00692369	0.0744	0.1165	down
OsTN1g000276	11	28	5	2	3	3	18	3	0.187	-2.421	0.0084547	0.0479153	0.4025	0.4194	down
OsTN1g000278	5	1	14	0	0	0	7	0	0.017	-5.889	0.000979738	0.00862128	0.8637	1.2316	down
OsTN1g000283	68	12	40	5	0	2	40	2	0.063	-3.989	2.12901133336918e-08	9.98892551919474e-07	0.1884	0.2093	down
OsTN1g000287	18	3	104	0	0	2	47	1	0.02	-5.626	0.000314227	0.00339298	1.0135	0.2326	down
OsTN1g000296	1	0	0	5	14	47	0	30	63.587	5.991	7.61245123603426e-07	2.3128546327017e-05	0.4472	0.1953	up
OsTN1g000308	32	29	23	21	5	6	31	10	0.351	-1.509	0.0085378	0.0482187	0.1693	0.2104	down
OsTN1g000319	13	6	3	37	9	23	8	24	3.147	1.654	0.00726828	0.0426621	0.1847	0.2246	up
OsTN1g000321	27	10	6	2	0	2	14	1	0.107	-3.225	0.00377278	0.0255702	0.5522	0.3573	down
OsTN1g000326	279	167	188	63	46	88	226	79	0.346	-1.53	7.84956603612585e-05	0.00109158	0.0943	0.1152	down
OsTN1g000362	1205	1804	793	2864	2046	5753	1475	4372	2.963	1.567	0.00209084	0.0159154	0.178	0.168	up
OsTN1g000364	232	152	96	713	187	670	171	573	3.351	1.744	0.000271671	0.00301798	0.1527	0.1503	up
OsTN1g000378	0	0	0	35	10	43	0	33	265.696	8.054	4.21684696415798e-10	3.17115863719498e-08	0.3047	0.191	up
OsTN1g000382	61	67	21	1	1	15	56	8	0.133	-2.907	0.00186291	0.0145406	0.4863	0.1988	down
OsTN1g000386	38	48	28	103	148	79	44	138	3.178	1.668	0.000216617	0.00248986	0.1236	0.1293	up
OsTN1g000401	11	2	9	0	0	1	8	0	0.068	-3.888	0.00541001	0.0339739	0.6759	1.1042	down
OsTN1g000402	2	10	3	1	0	0	7	0	0.073	-3.771	0.00619238	0.0377796	0.6144	1.0625	down
OsTN1g000406	182	90	74	53	24	19	120	34	0.284	-1.816	4.59756175764815e-05	0.000703975	0.117	0.1506	down
OsTN1g000434	158	56	80	40	20	18	100	29	0.282	-1.827	2.9039438647943e-05	0.000488761	0.1081	0.1564	down
OsTN1g000442	100	77	72	49	20	31	91	36	0.401	-1.318	0.000660444	0.00626395	0.0845	0.16	down
OsTN1g000467	98	31	64	291	68	67	66	135	2.063	1.045	0.00583323	0.0361078	0.0902	0.1167	up
OsTN1g000477	123	70	44	234	136	326	83	275	3.304	1.724	3.72052701564582e-05	0.000597284	0.1117	0.1167	up
OsTN1g000479	0	0	0	0	0	10	0	5	35.659	5.156	0.00187152	0.014597	0.5765	0.207	up
OsTN1g000495	194	46	116	29	11	18	119	21	0.176	-2.508	2.04556519954269e-08	9.66153701262847e-07	0.1066	0.1515	down
OsTN1g000504	10	5	1	33	27	27	5	35	6.069	2.601	0.000627619	0.00601442	0.2967	0.2038	up
OsTN1g000510	135	49	99	291	139	128	98	200	2.038	1.027	0.00147237	0.0120279	0.0658	0.116	up
OsTN1g000512	39	41	18	201	92	133	37	157	4.3	2.104	1.92756240966062e-05	0.000347896	0.1461	0.1367	up
OsTN1g000514	3	0	5	10	26	56	3	41	13.932	3.8	8.86328073015231e-06	0.000182135	0.3285	0.2029	up
OsTN1g000520	12	6	6	63	40	26	8	48	5.546	2.472	1.3370601099133e-07	5.04537967098423e-06	0.09	0.1928	up
OsTN1g000525	19	22	17	151	62	32	22	83	3.852	1.946	1.96291656976104e-05	0.000353375	0.1134	0.178	up
OsTN1g000540	237	142	306	140	36	55	250	77	0.314	-1.672	3.63714597483391e-06	8.7155881003732e-05	0.0811	0.1152	down
OsTN1g000541	16	18	14	69	44	46	18	60	3.36	1.748	0.000143923	0.00178489	0.1095	0.2	up
OsTN1g000554	3	0	0	223	23	6	1	68	61.339	5.939	2.02464554879188e-10	1.65140992897036e-08	0.2991	0.1823	up
OsTN1g000575	1	0	2	26	4	73	1	41	34.796	5.121	4.77750459417687e-05	0.000725534	0.6661	0.1497	up
OsTN1g000576	363	88	211	96	52	32	221	65	0.292	-1.776	4.6419244159155e-06	0.000107118	0.0926	0.115	down
OsTN1g000590	681	1308	199	2557	2291	2705	871	3042	3.494	1.805	0.00272935	0.0197682	0.2452	0.1786	up
OsTN1g000591	234	295	61	1113	628	678	224	903	4.032	2.011	4.1555843409931e-05	0.000653765	0.1585	0.1759	up
OsTN1g000594	0	1	6	8	25	93	3	57	20.252	4.34	1.86874059162373e-05	0.000339773	0.4763	0.2037	up
OsTN1g000595	4	12	41	15	252	751	23	477	21.055	4.396	1.14752331191806e-05	0.000227011	0.535	0.1235	up
OsTN1g000598	0	0	1	22	5	25	0	19	39.777	5.314	2.06695952219166e-07	7.45476370529226e-06	0.2468	0.2471	up
OsTN1g000599	1	0	1	107	115	21	1	96	115.701	6.854	2.8527952381609e-08	1.28721763012082e-06	0.5332	0.2056	up
OsTN1g000613	6139	1716	3812	596	170	359	3944	395	0.1	-3.319	4.53241490524327e-15	1.02254173293079e-12	0.107	0.1679	down
OsTN1g000614	64	6	28	2	0	3	31	2	0.062	-4.017	2.59300833230806e-07	9.10429266610216e-06	0.2145	0.2133	down
OsTN1g000630	303	474	190	95	76	141	377	127	0.335	-1.576	0.00275377	0.0199145	0.1848	0.1224	down
OsTN1g000631	19	5	6	0	0	0	10	0	0.012	-6.325	0.000291568	0.00320637	0.8012	1.5419	down
OsTN1g000634	140	86	60	59	18	25	101	35	0.348	-1.521	0.00245097	0.0181044	0.1554	0.1432	down
OsTN1g000645	41	4	26	2	7	1	23	4	0.186	-2.428	0.00742329	0.0433799	0.4201	0.2275	down
OsTN1g000663	90	113	131	274	215	307	128	318	2.485	1.313	0.00197552	0.0151958	0.1197	0.1263	up
OsTN1g000664	53	50	55	224	77	113	59	145	2.478	1.309	0.00107856	0.00932451	0.0996	0.1197	up
OsTN1g000665	24	32	17	101	140	96	28	141	5.064	2.34	9.20127189700771e-06	0.000187807	0.1631	0.1464	up
OsTN1g000666	20	5	15	125	41	21	14	61	4.415	2.143	1.46341066253092e-05	0.000276508	0.1267	0.1889	up
OsTN1g000667	612	168	365	2091	922	615	386	1263	3.268	1.708	5.70949789112761e-05	0.000837354	0.1214	0.1893	up
OsTN1g000680	634	679	188	14	0	39	561	21	0.038	-4.734	7.918700877077e-08	3.22945941346484e-06	0.3977	0.1583	down
OsTN1g000687	159	183	100	42	59	36	167	57	0.338	-1.564	0.000337654	0.00360919	0.118	0.1459	down
OsTN1g000693	245	64	278	1491	764	683	204	1067	5.213	2.382	4.91070020045167e-07	1.57789725986331e-05	0.1437	0.1882	up
OsTN1g000696	6	1	3	14	21	12	3	20	5.442	2.444	0.000751981	0.00696387	0.2184	0.2214	up
OsTN1g000708	89	43	114	12	6	14	88	12	0.138	-2.854	1.91653118216099e-07	6.95956794179593e-06	0.1531	0.1912	down
OsTN1g000714	1	3	2	16	17	56	2	38	15.813	3.983	8.87302482383095e-06	0.000182159	0.343	0.1967	up
OsTN1g000716	1	2	0	99	140	37	1	114	93.205	6.542	1.50934972484087e-15	3.81056900175005e-13	0.2066	0.1456	up
OsTN1g000725	18	10	15	91	28	43	16	56	3.646	1.866	5.84911748278171e-05	0.00085486	0.1093	0.1881	up
OsTN1g000736	48	26	27	160	88	39	36	102	2.857	1.514	0.00050019	0.0049824	0.1124	0.1608	up
OsTN1g000739	22	10	14	143	71	109	16	121	7.424	2.892	1.10084730355807e-07	4.25239868243278e-06	0.1611	0.1714	up
OsTN1g000740	60	38	51	113	173	227	54	221	4.084	2.03	1.17100938140045e-05	0.000230581	0.1328	0.1253	up
OsTN1g000741	2	1	5	10	18	10	3	16	5.284	2.401	0.0063108	0.0383037	0.3545	0.5106	up
OsTN1g000757	1	0	0	0	0	56	0	25	56.503	5.82	0.000892019	0.00799537	1.2273	0.209	up
OsTN1g000762	215	56	118	40	49	27	130	48	0.359	-1.48	0.00206224	0.0157656	0.144	0.1169	down
OsTN1g000785	0	0	0	0	0	12	0	5	43.849	5.454	0.00682259	0.0405399	1.4282	0.5557	up
OsTN1g000789	110	226	9	1800	1127	3045	139	2405	17.387	4.12	7.41496473784763e-07	2.2625778013746e-05	0.3849	0.1892	up
OsTN1g000790	31	39	15	240	93	178	33	187	5.844	2.547	2.38652210466555e-08	1.10023857116614e-06	0.1189	0.1295	up
OsTN1g000791	6	7	4	55	22	71	7	57	8.909	3.155	7.83484607249146e-07	2.37362258084752e-05	0.1921	0.2048	up
OsTN1g000792	0	0	1	8	16	3	0	12	23.426	4.55	0.000508726	0.00505319	0.5555	0.4982	up
OsTN1g000794	0	2	0	3	16	6	1	12	12.836	3.682	0.00102125	0.0089347	0.4271	0.4007	up
OsTN1g000795	1480	298	1994	3851	6389	2448	1317	5386	4.09	2.032	0.000302788	0.00329463	0.2109	0.1592	up
OsTN1g000796	5	0	1	15	56	26	2	45	20.6	4.365	1.78115062667189e-08	8.54909302851026e-07	0.2273	0.2021	up
OsTN1g000797	36	16	33	136	93	36	30	97	3.23	1.692	0.00517593	0.0328149	0.23	0.1732	up
OsTN1g000801	126	38	85	378	175	114	85	234	2.739	1.454	6.6086094789363e-05	0.000945036	0.0842	0.1228	up
OsTN1g000802	97	58	25	236	124	49	63	144	2.279	1.188	0.00720646	0.0423932	0.1256	0.1187	up
OsTN1g000805	55	30	35	21	0	3	43	6	0.173	-2.534	0.000131323	0.00165674	0.2293	0.2145	down
OsTN1g000809	274	160	271	46	16	21	254	29	0.115	-3.116	1.13380202897129e-12	1.54131664284578e-10	0.1043	0.1167	down
OsTN1g000810	9	14	15	1	1	2	15	2	0.112	-3.153	0.000627185	0.00601442	0.309	0.7223	down
OsTN1g000825	0	0	0	0	0	12	0	5	43.93	5.457	0.00873196	0.0489502	1.6079	0.5511	up
OsTN1g000827	140	59	88	97	18	20	99	41	0.433	-1.209	0.00167332	0.0133256	0.0877	0.1374	down
OsTN1g000832	228	185	390	69	77	91	300	98	0.325	-1.62	0.000350716	0.00372791	0.1336	0.1242	down
OsTN1g000834	6	3	6	9	15	49	5	32	5.821	2.541	0.00112647	0.00965601	0.3118	0.195	up
OsTN1g000840	100	129	73	152	215	220	115	249	2.155	1.108	0.00809793	0.0463391	0.1159	0.115	up
OsTN1g000844	1	0	0	11	8	20	0	16	33.29	5.057	1.21958175055534e-06	3.4669799174299e-05	0.2514	0.2105	up
OsTN1g000848	39	38	12	110	71	85	33	102	3.108	1.636	0.00271324	0.0196851	0.1843	0.164	up
OsTN1g000849	35	17	11	63	50	70	22	73	3.31	1.727	0.000608936	0.00588592	0.1455	0.1893	up
OsTN1g000860	1	0	0	0	5	13	0	9	18.343	4.197	0.0038946	0.0262867	0.7725	0.6801	up
OsTN1g000866	19	20	10	199	32	71	18	97	5.354	2.421	5.38405108633648e-06	0.00012251	0.1578	0.1869	up
OsTN1g000881	2	1	4	8	28	4	3	18	6.731	2.751	0.00187793	0.0146417	0.3451	0.2304	up
OsTN1g000882	48	39	62	27	9	20	56	20	0.37	-1.433	0.00118392	0.0100282	0.1015	0.1995	down
OsTN1g000914	0	0	2	5	1	28	1	15	16.502	4.045	0.00629894	0.0382427	0.9902	1.0256	up
OsTN1g000939	556	1099	190	107	208	138	736	198	0.267	-1.903	0.000817438	0.00742734	0.2144	0.1519	down
OsTN1g000946	7	10	0	679	403	281	7	501	78.664	6.298	1.32832138470549e-26	2.56088287322267e-23	0.1345	0.1367	up
OsTN1g000947	0	0	0	8	3	6	0	6	50.633	5.662	0.000126869	0.00161205	0.3516	1.0225	up
OsTN1g000951	0	0	0	3	3	4	0	4	33.212	5.054	0.00782954	0.0450953	1.1403	1.3815	up
OsTN1g000999	35	7	24	367	122	78	22	187	8.305	3.054	8.95938758904829e-11	7.9167388583728e-09	0.1206	0.1177	up
OsTN1g001004	44	33	27	27	5	8	38	13	0.359	-1.477	0.00157145	0.0127149	0.1038	0.204	down
OsTN1g001008	100	56	31	763	486	634	65	726	11.095	3.472	4.9771758492021e-08	2.14099327046712e-06	0.2356	0.1606	up
OsTN1g001017	93	59	25	14	12	2	62	11	0.167	-2.578	6.00253320666641e-06	0.000133995	0.1635	0.2013	down
OsTN1g001019	0	1	3	11	17	3	2	13	7.767	2.957	0.00118407	0.0100282	0.2938	0.4414	up
OsTN1g001021	4	12	4	0	0	0	8	0	0.015	-6.022	0.000133605	0.00167754	0.5065	0.8561	down
OsTN1g001026	6	47	12	80	59	571	28	309	11.098	3.472	2.81841536228735e-05	0.000476413	0.3945	0.127	up
OsTN1g001059	31	11	24	49	79	35	23	69	2.948	1.56	0.00257861	0.0188828	0.1562	0.1929	up
OsTN1g001080	0	0	0	138	76	127	0	131	1043.43	10.027	2.23860242857007e-21	1.97808507094523e-18	0.1839	0.1882	up
OsTN1g001083	503	252	382	175	107	150	402	166	0.412	-1.28	0.000855833	0.00771669	0.0983	0.1312	down
OsTN1g001085	4	4	2	7	4	37	4	20	5.41	2.436	0.00636205	0.0385245	0.3982	0.3406	up
OsTN1g001098	0	0	0	11	22	19	0	23	182.006	7.508	3.66746510843882e-05	0.000591003	0.9286	0.4722	up
OsTN1g001099	0	1	0	14	86	62	0	76	150.75	7.236	4.80874521568598e-07	1.54748193913585e-05	0.6805	0.2053	up
OsTN1g001100	12	11	5	58	87	49	10	82	7.876	2.977	1.44199123428618e-05	0.000273772	0.254	0.1704	up
OsTN1g001114	40	38	48	30	11	13	47	19	0.408	-1.294	0.00601494	0.0369522	0.1175	0.2037	down
OsTN1g001118	0	0	0	0	2	111	0	51	411.76	8.686	1.66436673270484e-05	0.000308807	1.1815	0.1419	up
OsTN1g001142	329	235	166	4	28	37	263	32	0.122	-3.037	0.000234721	0.00267144	0.4062	0.1151	down
OsTN1g001159	2	2	2	17	47	21	2	38	16.349	4.031	8.590803342473e-06	0.000177742	0.351	0.2134	up
OsTN1g001191	16	9	13	44	32	19	14	36	2.608	1.383	0.00768801	0.0444492	0.1373	0.2039	up
OsTN1g001192	113	118	152	259	545	405	145	532	3.672	1.877	0.00674336	0.0401413	0.3197	0.1404	up
OsTN1g001206	4	9	7	1581	684	411	8	923	120.076	6.908	6.88527343786772e-31	2.43359989661435e-27	0.1356	0.1555	up
OsTN1g001220	163	101	122	126	23	33	139	57	0.423	-1.242	0.00107672	0.00931236	0.089	0.1242	down
OsTN1g001223	64	90	96	281	271	127	97	267	2.768	1.469	0.00226146	0.0169645	0.1526	0.1187	up
OsTN1g001228	21	14	0	0	0	1	12	0	0.043	-4.548	0.00643911	0.0388517	1.1539	0.965	down
OsTN1g001234	51	44	34	16	3	5	48	8	0.172	-2.541	7.84064541103406e-05	0.00109105	0.2131	0.201	down
OsTN1g001235	29	6	78	6	4	9	41	7	0.184	-2.439	0.00624399	0.0379918	0.4523	0.192	down
OsTN1g001238	17	9	2	1	0	0	10	0	0.046	-4.437	0.00474073	0.0306795	0.9738	1.0178	down
OsTN1g001248	1	2	3	50	75	5	3	54	22.428	4.487	1.58299028136758e-06	4.35414719804958e-05	0.3753	0.2034	up
OsTN1g001249	0	0	0	5	2	1	0	3	23.092	4.529	0.00759276	0.0440065	0.6111	1.2749	up
OsTN1g001260	269	108	97	16	8	9	161	12	0.075	-3.733	2.35993785532743e-19	1.31703163415602e-16	0.0742	0.1311	down
OsTN1g001266	5	2	2	53	24	10	3	30	9.221	3.205	8.35440575513816e-05	0.00114526	0.3038	0.2018	up
OsTN1g001276	29	20	16	1	0	6	23	3	0.122	-3.041	4.97714108722716e-05	0.000750713	0.2142	0.2342	down
OsTN1g001279	32	21	16	85	43	52	25	67	2.685	1.425	0.00110746	0.00951618	0.105	0.1697	up
OsTN1g001286	111	43	142	265	983	97	105	623	5.903	2.561	0.00424976	0.0282699	0.5113	0.1731	up
OsTN1g001296	569	460	211	2081	694	738	450	1197	2.66	1.411	0.000398905	0.00413873	0.1086	0.189	up
OsTN1g001302	345	118	229	89	30	45	237	57	0.243	-2.039	1.2183679853453e-08	6.16657037356033e-07	0.0759	0.1152	down
OsTN1g001309	50	33	26	2	0	2	39	1	0.04	-4.642	1.02386285662396e-10	8.89879491820666e-09	0.1493	0.2258	down
OsTN1g001313	92	35	77	268	148	72	71	174	2.439	1.287	0.00160336	0.0129139	0.1062	0.1152	up
OsTN1g001314	193	172	211	999	674	339	214	747	3.481	1.8	1.88936322317869e-05	0.000341875	0.1172	0.1768	up
OsTN1g001318	4	0	3	4	34	29	2	32	12.714	3.668	0.000445389	0.00453233	0.5286	0.2399	up
OsTN1g001332	0	0	0	0	1	19	0	9	73.358	6.197	0.00203127	0.0155625	1.3511	0.2735	up
OsTN1g001337	2	3	4	23	26	16	4	26	7.52	2.911	0.000201497	0.00235037	0.2713	0.2036	up
OsTN1g001358	1278	575	760	509	159	226	909	308	0.339	-1.561	1.93673026263894e-05	0.000349254	0.0897	0.186	down
OsTN1g001368	440	334	328	2824	836	543	402	1360	3.383	1.758	3.31719058878546e-05	0.000544487	0.1205	0.1884	up
OsTN1g001381	0	0	8	82	282	48	3	189	59.683	5.899	2.62104669452091e-08	1.20052996221825e-06	0.4786	0.1207	up
OsTN1g001388	2	2	9	80	16	123	5	83	16.721	4.064	1.89879158775045e-07	6.90697653540716e-06	0.2877	0.1924	up
OsTN1g001389	0	0	0	0	4	6	0	5	37.816	5.241	0.00359737	0.0246333	0.8831	0.6471	up
OsTN1g001391	48	23	18	0	0	2	31	1	0.029	-5.128	1.19401829124686e-08	6.05778610106987e-07	0.2244	0.2716	down
OsTN1g001422	19541	22165	21595	1117	998	1525	24030	1483	0.062	-4.018	1.0383857444438e-16	3.34691904046008e-14	0.132	0.1171	down
OsTN1g001440	14	9	3	54	26	21	9	36	3.904	1.965	0.0052511	0.0331824	0.2755	0.2359	up
OsTN1g001444	52	18	25	2	0	14	32	7	0.208	-2.268	0.00641171	0.0387277	0.378	0.2068	down
OsTN1g001452	412	942	102	45	43	95	590	76	0.129	-2.95	0.000670614	0.00634615	0.4618	0.1678	down
OsTN1g001453	389	339	236	83	59	63	355	79	0.223	-2.166	2.74113025101065e-06	6.92037490871223e-05	0.1339	0.1317	down
OsTN1g001458	42	28	15	1	8	4	30	6	0.184	-2.442	0.00014159	0.00176215	0.1759	0.2052	down
OsTN1g001474	1	2	2	15	7	66	2	37	18.646	4.221	3.81539335158835e-06	9.07096937299709e-05	0.3403	0.203	up
OsTN1g001477	51	33	20	235	45	57	37	106	2.887	1.529	0.000495856	0.0049462	0.1159	0.1368	up
OsTN1g001485	24	11	71	484	536	188	39	482	12.248	3.615	2.38405453037395e-09	1.46972803562908e-07	0.2064	0.1249	up
OsTN1g001486	71	26	352	1524	2592	1000	169	2179	12.918	3.691	9.94436992452183e-07	2.91687763470725e-05	0.3293	0.1892	up
OsTN1g001511	4	7	2	49	33	33	5	44	8.858	3.147	1.52460160831353e-07	5.68935009972277e-06	0.1466	0.2023	up
OsTN1g001514	69	38	25	2	0	0	46	0	0.018	-5.83	1.03651645280258e-11	1.13306208322599e-09	0.1979	0.2033	down
OsTN1g001515	87	139	52	7	12	6	108	11	0.096	-3.373	4.1897333315513e-05	0.000655732	0.3687	0.1493	down
OsTN1g001518	435	369	311	2328	1532	1395	411	1994	4.856	2.28	2.37690113906107e-08	1.09819046745246e-06	0.1082	0.1875	up
OsTN1g001531	618	525	325	1518	776	1177	538	1305	2.424	1.277	0.00399719	0.0268765	0.1361	0.1892	up
OsTN1g001545	0	4	0	30	54	10	2	40	23.305	4.543	2.14297070257171e-06	5.59679552825593e-05	0.3601	0.2007	up
OsTN1g001548	242	55	114	14	8	0	135	8	0.057	-4.128	3.92435944592333e-10	2.97228181320343e-08	0.2079	0.1618	down
OsTN1g001559	136	12	147	50	25	12	100	30	0.307	-1.704	0.00647859	0.0390095	0.2476	0.1987	down
OsTN1g001570	15	3	20	1	0	0	13	0	0.035	-4.844	2.5202028562329e-05	0.000435501	0.3539	0.4825	down
OsTN1g001601	13	23	18	10	2	2	21	4	0.231	-2.111	0.00124492	0.01046	0.1812	0.2632	down
OsTN1g001606	291	152	228	60	21	69	239	57	0.238	-2.071	0.00505885	0.0322429	0.3539	0.1296	down
OsTN1g001617	529	290	421	223	107	98	442	154	0.348	-1.521	3.82689676021444e-05	0.000612044	0.0897	0.131	down
OsTN1g001618	44	42	37	18	6	12	46	13	0.286	-1.808	0.0023739	0.0176494	0.1943	0.2097	down
OsTN1g001621	0	0	0	14	4	0	0	5	45.849	5.519	0.00177383	0.0139739	0.8529	1.2324	up
OsTN1g001675	381	173	68	1691	868	192	210	947	4.503	2.171	0.000809925	0.00736854	0.2756	0.181	up
OsTN1g001683	22	11	24	126	59	62	20	89	4.347	2.12	1.5292602698139e-06	4.23934935188802e-05	0.1036	0.1569	up
OsTN1g001697	9	16	5	2	0	2	12	1	0.133	-2.912	0.00329042	0.0229841	0.3816	0.9161	down
OsTN1g001698	39	133	18	350	124	182	80	231	2.937	1.554	0.00566598	0.0353407	0.2083	0.1252	up
OsTN1g001707	0	0	0	6	15	26	0	21	167.591	7.389	2.39483671927646e-06	6.14858381424889e-05	0.5719	0.516	up
OsTN1g001712	73	50	9	164	91	144	47	152	3.264	1.707	0.000408536	0.00422625	0.1458	0.1359	up
OsTN1g001723	52	16	19	1	1	2	29	2	0.055	-4.172	7.22310645688411e-08	2.96861276416941e-06	0.1875	0.2736	down
OsTN1g001745	143	59	88	22	11	32	100	26	0.251	-1.992	6.08260814090255e-05	0.000881708	0.1421	0.1735	down
OsTN1g001747	0	0	1	4	16	20	0	18	37.074	5.212	0.000606023	0.00586311	0.8736	1.0755	up
OsTN1g001749	30	10	9	169	53	132	16	128	7.64	2.934	2.07125915479802e-10	1.68295758221462e-08	0.11	0.1681	up
OsTN1g001750	15	3	2	0	0	0	6	0	0.019	-5.703	0.000759171	0.0070182	0.6912	1.2357	down
OsTN1g001766	235	199	152	173	41	86	215	102	0.477	-1.069	0.00852947	0.0481956	0.1088	0.1161	down
OsTN1g001776	0	0	0	0	0	14	0	6	50.686	5.664	0.00160752	0.0129327	0.8969	0.2039	up
OsTN1g001793	99	10	102	10	7	8	71	10	0.136	-2.882	0.000767027	0.00707699	0.4159	0.2023	down
OsTN1g001808	1	0	2	29	11	8	1	16	13.982	3.805	1.9544177158599e-06	5.18740131417282e-05	0.1642	0.3173	up
OsTN1g001837	489	198	324	1606	415	581	351	866	2.467	1.303	0.000671554	0.00634937	0.1004	0.1854	up
OsTN1g001854	174	73	99	85	18	48	120	51	0.436	-1.197	0.000854122	0.00770528	0.0765	0.1352	down
OsTN1g001864	9	4	3	47	91	35	6	75	13.104	3.712	6.6255922952278e-07	2.05723185658706e-05	0.2722	0.2044	up
OsTN1g001865	0	0	1	12	24	9	0	20	39.287	5.296	9.10800588466892e-07	2.69767431279572e-05	0.2967	0.4958	up
OsTN1g001867	1	0	0	3	10	3	0	7	15.67	3.97	0.00600101	0.036893	0.7505	1.3536	up
OsTN1g001871	26	47	37	11	2	14	43	10	0.235	-2.088	0.00183899	0.014388	0.245	0.2166	down
OsTN1g001890	4	2	13	0	0	0	7	0	0.017	-5.842	0.000193147	0.00228448	0.4831	0.7081	down
OsTN1g001891	29	29	25	16	3	8	31	9	0.309	-1.694	0.000738747	0.00687132	0.1092	0.2123	down
OsTN1g001913	254	141	244	208	55	60	230	106	0.467	-1.099	0.000916728	0.0081548	0.0703	0.1175	down
OsTN1g001942	0	1	1	23	5	10	1	13	14.934	3.901	0.000155968	0.00190861	0.3338	0.2498	up
OsTN1g001990	1	0	23	37	79	13	9	56	6.018	2.589	0.00624507	0.0379918	0.5276	0.1513	up
OsTN1g002052	1254	1893	1020	290	313	248	1619	346	0.214	-2.227	8.40504729749343e-07	2.51759658245682e-05	0.133	0.189	down
OsTN1g002072	24	4	4	99	29	18	10	47	4.561	2.189	0.00118115	0.0100124	0.258	0.2023	up
OsTN1g002085	0	2	0	318	240	3	1	203	217.41	7.764	2.53912680379364e-06	6.47190992258148e-05	0.9806	0.1417	up
OsTN1g002112	119	66	81	435	132	140	94	237	2.513	1.329	0.00010707	0.00140771	0.0747	0.117	up
OsTN1g002136	25	57	17	116	122	81	40	128	3.247	1.699	0.00212815	0.0161264	0.1919	0.1523	up
OsTN1g002158	1245	950	817	105	7	24	1097	40	0.037	-4.74	1.42460535852846e-17	5.92384428202218e-15	0.1573	0.1837	down
OsTN1g002163	1966	679	1392	1099	361	252	1390	566	0.408	-1.294	0.00144202	0.0118393	0.1138	0.1877	down
OsTN1g002169	6	14	4	35	46	260	10	150	15.779	3.98	7.93930216558886e-07	2.39841568412597e-05	0.3363	0.188	up
OsTN1g002179	15	10	17	64	26	35	15	45	2.935	1.553	0.000740986	0.00688008	0.1042	0.202	up
OsTN1g002190	119	74	166	17	36	21	131	33	0.24	-2.058	3.41219922770635e-05	0.000557922	0.1447	0.1449	down
OsTN1g002198	0	0	0	45	8	0	0	15	123.027	6.943	4.73028446974573e-05	0.000720137	0.7686	0.3682	up
OsTN1g002203	0	2	0	94	13	0	1	29	32.069	5.003	0.000428906	0.00440169	0.8467	0.3713	up
OsTN1g002220	9	3	4	17	28	46	5	40	6.938	2.795	7.1012299745547e-05	0.00100449	0.2418	0.2026	up
OsTN1g002223	110	83	52	412	89	92	89	187	2.128	1.09	0.00358167	0.0245814	0.0901	0.1156	up
OsTN1g002238	68	50	13	205	83	236	47	200	4.268	2.094	1.55750009956413e-05	0.000291269	0.1446	0.12	up
OsTN1g002246	117	62	62	45	11	17	85	24	0.294	-1.766	5.42484933428348e-05	0.0008062	0.1065	0.1704	down
OsTN1g002248	5	6	4	26	12	45	6	33	5.782	2.532	0.000614463	0.00592045	0.2727	0.2447	up
OsTN1g002250	173	135	39	1127	343	304	125	587	4.712	2.236	1.68620983290446e-06	4.59633058180012e-05	0.1395	0.1691	up
OsTN1g002252	87	61	62	195	92	173	76	174	2.278	1.188	0.00306149	0.0217198	0.1029	0.1152	up
OsTN1g002280	40	31	40	27	5	17	41	17	0.424	-1.237	0.00785033	0.0451744	0.11	0.2048	down
OsTN1g002283	15	2	6	51	13	17	7	27	3.484	1.801	0.00197298	0.0151817	0.1615	0.2069	up
OsTN1g002288	3	2	0	17	6	6	2	10	5.413	2.436	0.00283982	0.0203949	0.2132	0.3585	up
OsTN1g002292	53	28	27	521	178	255	38	333	8.763	3.131	1.15210551047167e-15	2.99100065093728e-13	0.0837	0.1183	up
OsTN1g002309	114	69	109	1568	326	383	105	720	6.832	2.772	6.60368043003455e-10	4.74726274168619e-08	0.1232	0.1729	up
OsTN1g002328	18	17	49	1	2	0	32	1	0.039	-4.665	3.21190091649891e-07	1.09509297003525e-05	0.2783	0.2898	down
OsTN1g002348	20	25	12	4	7	2	22	6	0.244	-2.034	0.00521459	0.0330107	0.2463	0.2595	down
OsTN1g002349	73	54	37	19	18	25	59	25	0.417	-1.263	0.00451301	0.029615	0.107	0.1839	down
OsTN1g002359	21	13	15	88	49	23	18	57	3.245	1.698	0.00017609	0.00211698	0.1055	0.1719	up
OsTN1g002362	64	22	24	340	474	75	37	364	9.755	3.286	6.16072796463109e-08	2.58202683687612e-06	0.2131	0.1185	up
OsTN1g002365	63	19	52	777	537	136	46	529	11.384	3.509	3.55944208676742e-10	2.74491230305733e-08	0.1782	0.1365	up
OsTN1g002386	271	97	170	0	0	0	185	0	0.001	-10.532	7.96122489695097e-25	1.29872074145876e-21	0.1681	0.1241	down
OsTN1g002387	81	99	48	12	1	17	87	11	0.13	-2.946	4.7498271738997e-05	0.000722594	0.2898	0.2082	down
OsTN1g002388	17	5	3	1	0	0	8	0	0.055	-4.191	0.00320476	0.0225119	0.7179	1.6098	down
OsTN1g002392	0	4	1	10	19	55	2	37	17.503	4.13	3.11660890299957e-05	0.000518791	0.4245	0.1827	up
OsTN1g002397	73	204	428	24	9	103	282	57	0.203	-2.302	0.00366655	0.0250182	0.4016	0.1357	down
OsTN1g002403	128	76	300	15	6	16	187	14	0.075	-3.738	1.59530669459391e-08	7.81331849243721e-07	0.2299	0.1373	down
OsTN1g002411	1	0	0	10	78	30	0	57	122.013	6.931	1.10566521417031e-07	4.26324403580179e-06	0.5393	0.2081	up
OsTN1g002428	41	34	24	214	44	44	36	94	2.645	1.403	0.000910377	0.00811638	0.1057	0.164	up
OsTN1g002431	129	551	36	94	21	41	305	52	0.172	-2.538	8.43964413314738e-05	0.00115396	0.2592	0.1213	down
OsTN1g002432	10	82	2	0	0	0	42	0	0.003	-8.379	2.0043906383456e-05	0.000359925	1.0976	0.5641	down
OsTN1g002443	71	34	361	7	10	49	176	29	0.165	-2.601	0.00213247	0.0161486	0.442	0.1561	down
OsTN1g002451	3	4	0	15	18	9	3	17	6.294	2.654	0.00154757	0.0125697	0.2941	0.2275	up
OsTN1g002457	105	108	87	57	20	29	113	38	0.335	-1.577	0.000206532	0.00239471	0.1065	0.1543	down
OsTN1g002459	25	23	4	7	2	0	19	3	0.163	-2.615	0.00137886	0.0113824	0.2991	0.2982	down
OsTN1g002462	224	108	126	72	11	33	160	38	0.243	-2.039	3.71387486205347e-07	1.24423608530123e-05	0.0937	0.1212	down
OsTN1g002463	298	163	60	13	10	8	180	12	0.065	-3.935	7.17276254696025e-15	1.53649268013521e-12	0.1193	0.1194	down
OsTN1g002468	297	180	134	1013	305	192	217	489	2.265	1.18	0.00314346	0.0221852	0.1086	0.1658	up
OsTN1g002482	50	50	19	315	125	68	44	172	3.918	1.97	1.12956260626874e-05	0.000224085	0.1221	0.1204	up
OsTN1g002488	476	162	297	180	96	60	320	121	0.377	-1.408	0.000410116	0.0042364	0.1043	0.1341	down
OsTN1g002492	350	161	292	243	89	69	283	136	0.483	-1.051	0.00240495	0.0178241	0.079	0.1217	down
OsTN1g002507	1	6	5	59	63	73	5	80	16.921	4.081	3.79837242202464e-11	3.71492514108506e-09	0.1558	0.1574	up
OsTN1g002508	0	0	0	5	9	10	0	11	82.079	6.359	1.88634001439488e-05	0.000341619	0.4237	0.929	up
OsTN1g002516	52	10	6	114	51	88	21	94	4.336	2.116	0.000569404	0.00556211	0.2286	0.193	up
OsTN1g002517	713	344	196	939	649	1210	429	1115	2.593	1.375	0.00176119	0.0138949	0.1326	0.1832	up
OsTN1g002520	26	28	44	2	0	3	37	2	0.053	-4.247	1.61833700693639e-07	5.97910677806619e-06	0.2403	0.206	down
OsTN1g002523	155	56	74	71	18	12	97	32	0.337	-1.568	0.000808626	0.00736304	0.1322	0.1631	down
OsTN1g002527	84	35	62	174	94	99	63	136	2.135	1.095	0.00254209	0.0186799	0.0806	0.1152	up
OsTN1g002536	16	15	11	93	34	17	16	48	3.102	1.633	0.00587643	0.0363321	0.2014	0.1929	up
OsTN1g002566	2	1	0	24	5	10	1	13	11.298	3.498	0.000595839	0.00577512	0.3848	0.3506	up
OsTN1g002578	69	33	29	22	10	8	45	14	0.315	-1.667	0.000380948	0.00398361	0.1078	0.202	down
OsTN1g002583	39	52	25	211	110	59	45	135	3.071	1.619	0.000103284	0.00136811	0.1042	0.1481	up
OsTN1g002606	3	2	2	8	0	33	2	17	6.404	2.679	0.00574	0.0356556	0.4495	0.225	up
OsTN1g002611	0	0	0	0	8	2	0	5	39.543	5.305	0.00339384	0.02359	0.9052	0.2788	up
OsTN1g002616	664	654	391	130	116	233	637	198	0.31	-1.691	0.000132372	0.00166699	0.1301	0.1516	down
OsTN1g002619	78	30	37	255	137	215	49	231	4.592	2.199	1.9399467156932e-10	1.59459108525991e-08	0.0686	0.1164	up
OsTN1g002647	3	3	4	4	21	91	4	53	13.863	3.793	0.000444665	0.0045293	0.5989	0.2038	up
OsTN1g002648	1	9	11	39	190	126	9	166	19.275	4.269	1.91874161322132e-06	5.11190369241013e-05	0.4103	0.1199	up
OsTN1g002649	2	0	0	20	32	18	1	30	36.992	5.209	9.3072314816124e-07	2.74900359374031e-05	0.38	0.1968	up
OsTN1g002653	9	0	4	41	54	39	4	56	12.338	3.625	2.2456843234017e-08	1.04580242236595e-06	0.1823	0.1945	up
OsTN1g002680	12	12	8	0	1	0	12	1	0.042	-4.561	3.43449766954834e-05	0.000560893	0.2869	0.3529	down
OsTN1g002681	216	133	158	671	243	204	182	381	2.094	1.066	0.00721276	0.0424185	0.1068	0.1422	up
OsTN1g002691	0	0	0	0	7	4	0	5	43.215	5.433	0.00452339	0.029653	1.1557	0.8143	up
OsTN1g002700	138	43	63	12	0	2	82	4	0.057	-4.135	6.59625208486909e-13	9.45180526782559e-11	0.1335	0.1985	down
OsTN1g002714	1	0	0	7	2	15	0	9	20.713	4.372	0.00116751	0.00993155	0.6082	0.2013	up
OsTN1g002736	34	8	30	1	4	1	25	3	0.105	-3.246	0.00104063	0.00905569	0.4532	0.4596	down
OsTN1g002741	2	0	1	211	72	37	1	105	89.814	6.489	3.36754738602037e-21	2.85662309661336e-18	0.1251	0.1688	up
OsTN1g002742	14	12	11	308	234	96	14	240	17.605	4.138	1.9701117525948e-14	3.90468784460542e-12	0.1428	0.1175	up
OsTN1g002762	10	8	117	2	2	8	52	5	0.098	-3.352	0.0012175	0.0102621	0.5732	0.2179	down
OsTN1g002765	79	20	70	0	0	2	58	1	0.015	-6.034	8.38067664976598e-11	7.46760545006668e-09	0.256	0.2049	down
OsTN1g002766	14	27	22	0	0	2	25	1	0.037	-4.77	2.40107533197382e-05	0.000418065	0.4522	0.4688	down
OsTN1g002769	15	0	8	22	22	43	7	37	4.655	2.219	0.000461408	0.00465956	0.2035	0.2026	up
OsTN1g002771	11	0	8	16	93	31	6	66	10.263	3.359	4.42471124996937e-05	0.000683429	0.3571	0.1956	up
OsTN1g002790	564	252	365	147	39	39	412	73	0.18	-2.471	3.44145413410146e-10	2.67336695318277e-08	0.0939	0.1445	down
OsTN1g002806	14	20	1	0	0	1	13	0	0.038	-4.71	0.000799334	0.00731297	0.6922	0.9514	down
OsTN1g002807	143	109	102	240	266	227	129	300	2.317	1.212	0.00207918	0.0158438	0.1026	0.1321	up
OsTN1g002816	86	51	56	54	12	22	69	29	0.436	-1.197	0.00241431	0.0178629	0.0851	0.1818	down
OsTN1g002825	243	44	86	58	47	6	120	41	0.342	-1.547	0.00757036	0.0439007	0.2149	0.1388	down
OsTN1g002850	30	27	21	3	3	12	29	8	0.259	-1.948	0.00461292	0.0300911	0.2382	0.2196	down
OsTN1g002856	354	226	223	1171	1226	495	288	1148	3.985	1.995	1.26381878107064e-05	0.000245294	0.1378	0.1885	up
OsTN1g002857	3	1	3	6	21	15	2	19	7.262	2.86	0.00192193	0.0149025	0.3889	0.3059	up
OsTN1g002866	433	149	395	17	10	21	340	19	0.054	-4.202	1.4940386839162e-19	8.80113288050302e-17	0.1038	0.116	down
OsTN1g002890	66	11	38	146	77	33	37	90	2.35	1.233	0.00576051	0.035762	0.1216	0.153	up
OsTN1g002906	20	21	33	4	0	10	28	6	0.197	-2.341	0.0070495	0.0416431	0.4049	0.2592	down
OsTN1g002921	31	50	50	17	9	8	51	12	0.246	-2.023	0.00015971	0.00195214	0.1467	0.2067	down
OsTN1g002928	30	41	41	133	79	78	43	108	2.541	1.345	0.000898652	0.00804462	0.0971	0.1529	up
OsTN1g002929	36	18	54	16	4	9	39	10	0.263	-1.929	0.00152607	0.0124141	0.1955	0.2167	down
OsTN1g002933	0	0	0	6	2	7	0	6	45.908	5.521	0.000285939	0.00315664	0.3978	0.9242	up
OsTN1g002935	187	186	262	37	3	50	239	33	0.139	-2.845	2.83004888035202e-06	7.07470556388734e-05	0.2186	0.1163	down
OsTN1g002941	51	29	50	69	415	84	47	272	5.794	2.534	0.000220338	0.00252579	0.2929	0.1217	up
OsTN1g002943	19	21	9	64	52	63	18	71	3.874	1.954	0.000616597	0.00593832	0.1871	0.199	up
OsTN1g002953	117	117	126	1000	639	875	135	972	7.199	2.848	5.32684230532765e-12	6.27590804272686e-10	0.1037	0.1746	up
OsTN1g002954	0	0	1	120	21	4	0	41	87.071	6.444	5.02430440287794e-10	3.71255830912308e-08	0.2834	0.2017	up
OsTN1g002960	356	142	212	37	6	24	245	23	0.096	-3.387	1.27200755229494e-13	2.12405229618258e-11	0.1101	0.1155	down
OsTN1g002980	0	0	0	0	4	260	0	120	961.495	9.909	6.60000536073741e-07	2.05229198951845e-05	1.063	0.2063	up
OsTN1g002983	18	39	50	666	53	26	43	198	4.7	2.233	0.00844888	0.0478951	0.4618	0.1261	up
OsTN1g002992	8	13	10	73	55	35	12	62	5.245	2.391	2.70405744769405e-06	6.83491612553607e-05	0.1272	0.1792	up
OsTN1g002995	20	34	9	212	203	211	25	253	10.382	3.376	1.9773830513852e-10	1.61908735022108e-08	0.1532	0.1172	up
OsTN1g002998	1	8	2	47	34	5	5	32	6.808	2.767	0.00344086	0.0238621	0.4727	0.2345	up
OsTN1g003004	67	30	52	160	55	111	52	118	2.236	1.161	0.00117453	0.00996858	0.0758	0.1457	up
OsTN1g003008	69	24	59	23	6	6	53	11	0.225	-2.149	2.35835255605341e-05	0.000413335	0.1293	0.2026	down
OsTN1g003013	732	398	669	1518	1659	944	644	1662	2.579	1.367	0.000811651	0.00738108	0.1147	0.1876	up
OsTN1g003014	254	56	171	773	207	189	161	379	2.346	1.23	0.00691627	0.0409702	0.141	0.1484	up
OsTN1g003018	335	235	219	1077	501	282	285	648	2.273	1.185	0.00211116	0.0160484	0.1016	0.1862	up
OsTN1g003020	127	66	93	40	22	23	101	32	0.309	-1.693	1.70807216631321e-06	4.64398543987233e-05	0.0652	0.1592	down
OsTN1g003024	274	124	153	2848	852	443	191	1329	6.934	2.794	5.86273976406128e-09	3.31549659137193e-07	0.143	0.1891	up
OsTN1g003063	2	0	2	14	17	16	1	20	12.737	3.671	0.000143773	0.00178408	0.3679	0.2018	up
OsTN1g003082	99	20	46	296	175	66	54	193	3.517	1.814	4.34161137545489e-05	0.000672773	0.1232	0.1153	up
OsTN1g003091	82	31	42	169	52	157	53	139	2.608	1.383	0.00593035	0.0365915	0.163	0.125	up
OsTN1g003094	32	30	19	177	47	37	30	84	2.839	1.505	0.000845451	0.0076491	0.1186	0.1392	up
OsTN1g003100	6249	10345	2714	24129	23865	18974	7567	26912	3.557	1.83	4.66376061374964e-05	0.000712568	0.1367	0.0959	up
OsTN1g003115	2536	1250	1870	410	130	181	1997	249	0.125	-3.004	7.67634887171915e-10	5.39047452061417e-08	0.146	0.1864	down
OsTN1g003116	1	0	1	29	10	0	1	12	15.176	3.924	0.00155349	0.0126033	0.6091	0.5565	up
OsTN1g003125	72	62	58	79	94	246	71	180	2.529	1.338	0.00354564	0.0243922	0.1363	0.1247	up
OsTN1g003128	141	39	148	843	265	145	114	406	3.56	1.832	1.62350479581937e-05	0.000302015	0.1173	0.14	up
OsTN1g003141	0	0	0	0	3	64	0	31	245.47	7.939	0.000519697	0.0051381	1.7605	0.2074	up
OsTN1g003145	45	32	55	40	12	12	48	21	0.455	-1.137	0.00751945	0.0437078	0.0937	0.1987	down
OsTN1g003152	502	169	399	285	92	83	370	154	0.418	-1.258	0.00125757	0.0105287	0.1017	0.1407	down
OsTN1g003157	702	735	579	210	189	87	758	189	0.249	-2.007	7.23048313196392e-05	0.0010202	0.1678	0.1704	down
OsTN1g003158	184	78	79	61	20	19	117	34	0.293	-1.772	2.78161216149219e-05	0.000471163	0.1043	0.1492	down
OsTN1g003160	15	9	22	0	0	3	17	1	0.078	-3.688	0.000200967	0.00234643	0.3534	0.3641	down
OsTN1g003162	23	12	21	61	38	45	20	55	2.715	1.441	0.00118126	0.0100124	0.1033	0.1892	up
OsTN1g003175	86	35	70	0	2	0	67	1	0.013	-6.253	1.07955040638528e-16	3.4170187265989e-14	0.1343	0.2021	down
OsTN1g003177	100	144	14	197	199	329	99	301	3.028	1.598	0.00631571	0.0383116	0.2283	0.124	up
OsTN1g003181	25	19	8	82	26	23	19	44	2.366	1.243	0.00853144	0.0481956	0.1187	0.1995	up
OsTN1g003185	204	220	172	95	95	62	225	101	0.446	-1.166	0.00455865	0.0298289	0.1103	0.115	down
OsTN1g003192	1	0	1	6	6	7	1	8	9.244	3.208	0.00311759	0.0220383	0.3585	0.6082	up
OsTN1g003204	0	0	0	0	4	5	0	4	34.077	5.091	0.00438952	0.0289454	0.8418	0.7354	up
OsTN1g003215	665	282	360	235	89	56	451	128	0.285	-1.81	4.30552506170981e-05	0.000669408	0.1281	0.1573	down
OsTN1g003231	66	39	29	6	0	14	47	8	0.165	-2.598	0.00138081	0.0113941	0.3646	0.2028	down
OsTN1g003234	234	92	184	56	26	39	178	45	0.251	-1.994	3.09449381467584e-06	7.63968921162171e-05	0.1094	0.1341	down
OsTN1g003242	62	100	78	184	174	240	94	244	2.615	1.387	0.000758988	0.0070182	0.1097	0.1152	up
OsTN1g003245	0	0	1	11	5	28	0	18	36.625	5.195	4.60692661612555e-06	0.000106542	0.3536	0.2031	up
OsTN1g003253	0	0	0	0	0	17	0	8	61.971	5.954	0.00303648	0.02158	1.3704	0.3733	up
OsTN1g003257	58	52	48	27	6	14	59	16	0.282	-1.827	0.000119259	0.00153188	0.1173	0.1982	down
OsTN1g003283	0	2	1	13	15	24	1	22	17.18	4.103	6.66948112098353e-06	0.000146266	0.2736	0.2274	up
OsTN1g003287	0	4	6	19	68	90	4	81	19.478	4.284	0.000103744	0.00137163	0.6075	0.1437	up
OsTN1g003299	27	19	19	135	37	72	24	84	3.601	1.848	6.8152711435483e-05	0.000970661	0.1212	0.185	up
OsTN1g003303	167	79	164	117	33	43	146	65	0.451	-1.15	0.000547796	0.00536835	0.0665	0.1254	down
OsTN1g003329	3	2	1	12	29	15	2	25	10.879	3.443	0.000193882	0.00229189	0.3729	0.2204	up
OsTN1g003331	123	93	88	31	20	21	111	28	0.245	-2.026	1.87692676653305e-06	5.03204153407522e-05	0.0994	0.1332	down
OsTN1g003332	76	33	30	24	11	8	48	15	0.321	-1.641	0.00104263	0.00906938	0.1313	0.1989	down
OsTN1g003358	71	21	26	291	60	55	39	126	3.205	1.68	0.000107981	0.00141793	0.1143	0.1266	up
OsTN1g003362	28	3	5	38	48	27	11	47	3.991	1.997	0.00172993	0.0137095	0.2285	0.2013	up
OsTN1g003387	63	18	71	17	7	1	53	8	0.16	-2.641	0.000103415	0.00136835	0.2461	0.2033	down
OsTN1g003388	290	575	178	74	63	52	416	74	0.178	-2.488	1.05009745713668e-06	3.04643184315971e-05	0.1605	0.1296	down
OsTN1g003389	81	68	53	53	8	5	74	19	0.273	-1.871	0.000547737	0.00536835	0.172	0.1872	down
OsTN1g003409	70	66	47	222	62	118	68	139	2.067	1.047	0.00507681	0.032283	0.0869	0.137	up
OsTN1g003422	108	36	188	12	23	28	119	28	0.227	-2.14	0.000351539	0.00373315	0.2157	0.1422	down
OsTN1g003452	96	49	68	820	205	183	76	387	5.138	2.361	6.55414651378316e-09	3.63858076224606e-07	0.1016	0.1355	up
OsTN1g003462	206	55	226	68	30	23	169	42	0.252	-1.99	4.098094201718e-06	9.66721732322954e-05	0.1118	0.1305	down
OsTN1g003477	364	147	353	171	63	86	305	113	0.372	-1.427	0.000111234	0.00145077	0.0884	0.118	down
OsTN1g003481	31	21	33	132	40	45	31	73	2.381	1.252	0.00181562	0.0142449	0.0897	0.1536	up
OsTN1g003491	115	45	65	5	11	20	77	16	0.2	-2.32	0.000263924	0.00294426	0.229	0.199	down
OsTN1g003503	91	45	51	44	9	8	66	19	0.302	-1.729	0.000550158	0.00538901	0.1419	0.1762	down
OsTN1g003518	0	0	0	0	0	10	0	5	36.281	5.181	0.00484878	0.0312168	0.9803	0.37	up
OsTN1g003537	8	7	4	2	0	1	7	1	0.167	-2.581	0.00838363	0.047576	0.2878	0.8316	down
OsTN1g003540	23	33	26	4	3	14	32	9	0.275	-1.864	0.00785392	0.0451744	0.2609	0.2198	down
OsTN1g003541	145	281	132	42	20	84	221	59	0.265	-1.918	0.00368458	0.025125	0.2831	0.1159	down
OsTN1g003547	4	0	0	13	14	11	1	15	10.636	3.411	0.000286436	0.00315871	0.3341	0.2917	up
OsTN1g003549	6	15	9	11	25	201	12	107	8.842	3.144	0.00603836	0.0370745	0.7716	0.1731	up
OsTN1g003570	97	60	49	208	108	113	73	158	2.148	1.103	0.000932755	0.00826962	0.0676	0.1174	up
OsTN1g003571	374	318	355	847	1175	635	388	1108	2.856	1.514	0.000435805	0.00445404	0.126	0.1883	up
OsTN1g003577	13	4	20	0	1	4	13	2	0.164	-2.61	0.00518958	0.0328818	0.3569	0.6486	down
OsTN1g003580	1	0	15	36	62	84	6	79	12.779	3.676	0.000312636	0.00338096	0.5577	0.1586	up
OsTN1g003581	134	76	89	377	180	158	106	256	2.409	1.268	0.000334689	0.00358362	0.0806	0.1212	up
OsTN1g003590	19	13	25	71	51	77	21	79	3.74	1.903	6.33458466648514e-05	0.000913164	0.1247	0.1846	up
OsTN1g003592	40	12	19	170	43	31	24	77	3.225	1.689	0.00445116	0.0292882	0.2176	0.1709	up
OsTN1g003600	1474	896	1828	427	114	329	1529	311	0.204	-2.294	1.94694321145106e-07	7.04587451966599e-06	0.1257	0.1887	down
OsTN1g003611	14	12	10	0	1	2	13	2	0.101	-3.311	0.00168221	0.0133813	0.4223	0.7813	down
OsTN1g003614	889	382	483	394	209	168	606	280	0.462	-1.115	0.00347077	0.0240068	0.0996	0.1766	down
OsTN1g003615	1502	1315	1177	528	540	443	1477	611	0.413	-1.275	0.0072659	0.0426621	0.1564	0.1871	down
OsTN1g003620	0	0	2	8	6	16	1	12	14.215	3.829	0.000590355	0.00573244	0.4285	0.2056	up
OsTN1g003643	109	70	45	8	5	9	80	9	0.107	-3.226	2.75413470768713e-07	9.57490733539688e-06	0.1944	0.1884	down
OsTN1g003644	33	21	19	13	4	9	26	9	0.362	-1.465	0.00712605	0.0420134	0.1359	0.2137	down
OsTN1g003645	118	104	33	34	26	15	93	28	0.305	-1.714	0.00047818	0.0048015	0.1412	0.1572	down
OsTN1g003658	6	6	4	37	26	11	6	28	4.608	2.204	0.000190858	0.0022624	0.1466	0.2354	up
OsTN1g003661	30	16	40	229	70	47	31	113	3.635	1.862	0.000129943	0.00164127	0.1418	0.1296	up
OsTN1g003675	56	56	33	20	3	11	54	11	0.22	-2.185	4.17477407375182e-05	0.000655527	0.145	0.2005	down
OsTN1g003676	0	0	0	0	0	28	0	13	101.824	6.67	0.000660451	0.00626395	1.2133	0.2926	up
OsTN1g003684	29	10	16	139	19	21	19	53	2.829	1.5	0.00668144	0.0399248	0.1799	0.1937	up
OsTN1g003685	758	937	626	270	193	332	886	316	0.357	-1.485	0.00414523	0.027705	0.183	0.1836	down
OsTN1g003694	0	2	0	13	5	6	1	8	9.828	3.297	0.00134567	0.0111345	0.3006	0.6295	up
OsTN1g003699	583	311	312	149	52	124	424	119	0.281	-1.83	6.93643986576204e-07	2.13189971352486e-05	0.0869	0.1368	down
OsTN1g003702	17	44	24	9	6	14	35	11	0.337	-1.569	0.00855876	0.0482728	0.185	0.2105	down
OsTN1g003706	492	171	168	128	72	49	278	91	0.325	-1.622	5.80984410309571e-06	0.000130934	0.0805	0.1291	down
OsTN1g003709	0	0	3	14	11	11	1	14	11.369	3.507	0.000758532	0.0070182	0.4117	0.2409	up
OsTN1g003735	176	81	105	0	0	4	126	2	0.013	-6.236	7.67373992582964e-16	2.08637182829576e-13	0.1923	0.172	down
OsTN1g003743	5	2	4	69	40	12	4	43	10.742	3.425	1.99244367730943e-05	0.000358083	0.3068	0.1979	up
OsTN1g003756	0	0	0	4	10	1	0	7	52.935	5.726	0.00259556	0.0189872	1.1266	1.1248	up
OsTN1g003757	0	0	0	5	40	22	0	32	254.026	7.989	2.5438992561722e-08	1.1677158338884e-06	0.4342	0.256	up
OsTN1g003764	68	31	108	5	14	7	75	12	0.151	-2.731	0.000244327	0.00276049	0.3079	0.1942	down
OsTN1g003768	71	30	42	429	137	57	50	200	4.036	2.013	4.08515152075373e-06	9.64741740541473e-05	0.117	0.1174	up
OsTN1g003779	0	0	2	25	22	9	1	22	25.141	4.652	1.02728501578416e-06	2.99664832596075e-05	0.2656	0.2208	up
OsTN1g003784	135	79	117	592	147	206	119	312	2.635	1.398	3.73284195508619e-05	0.000598808	0.074	0.1279	up
OsTN1g003787	69	49	40	236	64	106	57	138	2.433	1.282	0.00227318	0.0170284	0.1108	0.1385	up
OsTN1g003795	5	7	3	27	22	24	6	29	5.047	2.336	0.000134198	0.00168299	0.159	0.2034	up
OsTN1g003798	53	17	24	1	4	2	32	3	0.09	-3.477	3.03613796751817e-07	1.04524964086295e-05	0.1604	0.2061	down
OsTN1g003800	191	149	133	677	191	298	173	397	2.306	1.205	0.000693255	0.00651678	0.0841	0.1429	up
OsTN1g003820	41	4	34	7	5	4	26	6	0.23	-2.121	0.00438168	0.0289117	0.283	0.2196	down
OsTN1g003826	182	55	205	41	37	22	155	39	0.249	-2.003	3.14692840060974e-06	7.75109298394086e-05	0.1082	0.1198	down
OsTN1g003834	231	137	137	1060	251	340	180	539	3.007	1.588	2.91300983536988e-05	0.000489151	0.0957	0.1553	up
OsTN1g003841	9	0	1	42	80	24	3	63	18.47	4.207	5.41749616298587e-09	3.11351872976806e-07	0.2206	0.2023	up
OsTN1g003843	28	17	26	14	1	2	26	5	0.211	-2.241	0.00251994	0.0185492	0.281	0.246	down
OsTN1g003849	2	9	1	0	0	504	5	229	44.364	5.471	0.00631534	0.0383116	1.9425	0.1672	up
OsTN1g003863	34	17	69	1	0	1	44	1	0.019	-5.704	6.55684463601237e-11	6.12559489849843e-09	0.2092	0.2026	down
OsTN1g003876	56	150	93	507	746	309	121	653	5.403	2.434	7.66679177683309e-06	0.000163243	0.1875	0.1736	up
OsTN1g003883	22	10	6	78	13	46	13	46	3.544	1.825	0.00091364	0.00813416	0.1635	0.2044	up
OsTN1g003884	272	197	63	945	402	775	190	789	4.155	2.055	6.59222168529283e-06	0.000145022	0.1357	0.1676	up
OsTN1g003888	7	6	3	233	103	61	6	137	23.42	4.55	1.53744115839598e-15	3.83582525248278e-13	0.1359	0.13	up
OsTN1g003899	90	68	43	336	185	150	73	245	3.377	1.756	4.30985765048004e-06	0.000100882	0.0908	0.115	up
OsTN1g003924	804	898	421	210	63	168	800	159	0.2	-2.323	9.8616024724241e-08	3.85147336340144e-06	0.121	0.171	down
OsTN1g003934	18	4	3	57	69	38	8	67	7.931	2.988	1.25801969267524e-06	3.56192571729823e-05	0.1923	0.199	up
OsTN1g003940	171	359	79	25	11	79	244	48	0.194	-2.363	0.000202051	0.00235175	0.2521	0.1227	down
OsTN1g003944	142	161	58	538	186	148	136	293	2.17	1.118	0.00577995	0.0358434	0.1096	0.1276	up
OsTN1g003945	28	29	18	19	1	4	28	7	0.275	-1.861	0.00341273	0.023698	0.2049	0.2145	down
OsTN1g003947	69	34	35	319	152	62	48	184	3.812	1.931	6.37666390154664e-06	0.000141037	0.1115	0.1199	up
OsTN1g003948	336	201	279	1169	1006	376	293	978	3.333	1.737	7.10559100366544e-05	0.00100449	0.1281	0.185	up
OsTN1g003954	4	1	0	16	48	26	1	41	21.943	4.456	4.56663274881337e-08	1.97642001436908e-06	0.2453	0.2043	up
OsTN1g003957	106	46	64	54	21	20	75	33	0.444	-1.171	0.00126086	0.010548	0.0706	0.1794	down
OsTN1g003958	114	67	81	62	18	37	94	41	0.443	-1.174	0.00185381	0.0144909	0.0818	0.1607	down
OsTN1g003988	0	0	0	22	3	18	0	15	122.17	6.933	2.7234674116201e-07	9.48383799642489e-06	0.3115	0.3883	up
OsTN1g003995	21	10	21	0	1	3	19	2	0.093	-3.432	0.000128278	0.00162897	0.2908	0.2057	down
OsTN1g003997	20	1	9	92	79	30	9	77	7.764	2.957	1.0602250396278e-05	0.000212717	0.244	0.149	up
OsTN1g004006	13	14	20	1082	239	121	18	439	24.852	4.635	2.92139143514079e-15	7.04022138238987e-13	0.1695	0.1396	up
OsTN1g004010	39	18	27	125	30	69	30	77	2.612	1.385	0.000631085	0.00603673	0.0916	0.1706	up
OsTN1g004013	191	191	395	429	394	1360	295	927	3.146	1.653	0.00146229	0.0119594	0.1825	0.1703	up
OsTN1g004014	52	18	47	127	66	190	41	151	3.672	1.876	2.6839361302234e-05	0.000456808	0.1208	0.1541	up
OsTN1g004029	9	7	2	55	17	17	6	30	4.627	2.21	0.000215103	0.00247783	0.1614	0.2009	up
OsTN1g004031	45	35	17	993	439	329	35	617	17.606	4.138	2.35774939842303e-17	9.25940583191799e-15	0.1249	0.1537	up
OsTN1g004042	1949	521	862	149	98	85	1105	126	0.113	-3.141	6.21649951552969e-12	7.16485354488251e-10	0.1243	0.1852	down
OsTN1g004045	2645	2209	2583	2	2	1	2751	2	0.001	-10.447	8.56814543895191e-44	9.08523301619266e-40	0.1519	0.1854	down
OsTN1g004046	61	67	60	0	0	0	71	0	0.002	-9.146	3.38231141921077e-20	2.31382833120009e-17	0.1342	0.1973	down
OsTN1g004047	1238	860	1075	3	1	10	1154	6	0.005	-7.677	7.67143257091852e-23	9.03822614063717e-20	0.2218	0.1812	down
OsTN1g004050	74	76	51	68	353	157	75	273	3.617	1.855	0.00335587	0.0233951	0.2621	0.1372	up
OsTN1g004051	522	245	402	314	101	126	412	185	0.451	-1.148	0.000715737	0.00669252	0.0768	0.1457	down
OsTN1g004060	87	43	75	46	5	15	73	20	0.295	-1.759	0.000114033	0.0014809	0.115	0.1838	down
OsTN1g004070	23	3	4	0	0	0	9	0	0.013	-6.253	8.42965986599514e-05	0.00115334	0.5546	0.7263	down
OsTN1g004071	55	31	32	0	2	6	42	4	0.082	-3.601	3.14437435135114e-06	7.75109298394086e-05	0.2529	0.2326	down
OsTN1g004072	0	3	0	3	19	11	1	16	11.761	3.556	0.000647344	0.00616168	0.4089	0.2134	up
OsTN1g004075	1	0	3	14	2	11	2	9	6.182	2.628	0.00267608	0.0194622	0.2435	0.2405	up
OsTN1g004077	108	28	36	304	222	114	56	241	4.231	2.081	2.28737339023512e-05	0.000401892	0.1518	0.1156	up
OsTN1g004079	16	4	7	15	132	27	9	85	9.166	3.196	5.38342839133241e-05	0.00080173	0.3441	0.1748	up
OsTN1g004083	124	169	109	362	651	511	155	660	4.271	2.095	4.49153775542633e-05	0.000691736	0.1714	0.1699	up
OsTN1g004093	34	30	1	0	1	1	24	1	0.039	-4.686	1.28902753127591e-05	0.000249648	0.3894	0.289	down
OsTN1g004095	44	79	37	94	123	409	63	273	4.338	2.117	0.000174043	0.00209429	0.202	0.1163	up
OsTN1g004097	80	9	41	149	124	106	42	149	3.479	1.799	0.000103432	0.00136835	0.1324	0.1479	up
OsTN1g004105	95	29	67	430	295	339	65	412	6.241	2.642	3.55013264579707e-11	3.55130485940653e-09	0.0949	0.1419	up
OsTN1g004106	69	14	42	78	75	157	42	129	3.066	1.616	0.00323697	0.0227006	0.1921	0.155	up
OsTN1g004117	146	25	68	53	14	14	78	26	0.346	-1.533	0.00156737	0.0126867	0.1393	0.1868	down
OsTN1g004126	24	16	11	142	27	46	18	69	3.817	1.933	0.000136183	0.00170385	0.1428	0.1585	up
OsTN1g004143	17	15	39	132	59	61	27	90	3.392	1.762	0.000215591	0.00248211	0.1313	0.1642	up
OsTN1g004146	27	16	26	129	38	58	25	77	3.121	1.642	2.57431015284004e-05	0.00044241	0.0795	0.1797	up
OsTN1g004163	156	122	115	83	18	31	144	43	0.309	-1.693	7.42023916483347e-06	0.000159111	0.0837	0.1281	down
OsTN1g004178	14	2	6	32	201	27	7	126	16.938	4.082	6.99803474211811e-06	0.000152369	0.4293	0.1511	up
OsTN1g004180	9	17	27	65	99	65	21	97	4.675	2.225	5.38259010273744e-05	0.00080173	0.1737	0.1412	up
OsTN1g004184	58	47	50	338	90	70	57	160	2.832	1.502	9.40671348035326e-05	0.00126498	0.0905	0.1208	up
OsTN1g004185	18	4	7	137	83	2	10	77	7.902	2.982	0.000114955	0.0014865	0.3347	0.1861	up
OsTN1g004205	18	36	28	64	219	101	33	176	5.428	2.44	0.000216476	0.00248959	0.2662	0.1168	up
OsTN1g004206	0	0	0	4	2	8	0	6	45.33	5.502	0.00102465	0.00895332	0.6557	1.1781	up
OsTN1g004207	894	1034	537	3664	3460	1891	933	3551	3.807	1.929	9.03198652121332e-05	0.00122391	0.1626	0.1695	up
OsTN1g004208	317	147	114	1656	514	338	199	819	4.121	2.043	7.08023707400268e-06	0.000153371	0.1355	0.1823	up
OsTN1g004215	88	70	52	228	108	109	77	161	2.104	1.073	0.000851867	0.00769073	0.0626	0.1167	up
OsTN1g004216	0	0	0	18	24	19	0	26	201.943	7.658	4.33342042838129e-09	2.53164867836589e-07	0.3026	0.2067	up
OsTN1g004225	22	6	11	387	137	65	13	194	14.459	3.854	1.12279063918793e-12	1.53978021020345e-10	0.1472	0.1403	up
OsTN1g004234	26	9	21	94	41	23	20	54	2.781	1.475	0.00357177	0.0245452	0.1449	0.191	up
OsTN1g004238	274	143	161	739	454	309	203	555	2.725	1.446	4.52131270565193e-05	0.000694808	0.0837	0.165	up
OsTN1g004240	17	11	19	91	28	48	17	58	3.43	1.778	3.14944149197644e-05	0.000521798	0.0896	0.1887	up
OsTN1g004242	13	22	20	6	2	6	22	5	0.247	-2.016	0.00893549	0.0498802	0.2948	0.2764	down
OsTN1g004258	40	34	19	183	64	75	34	111	3.303	1.724	1.16794335934897e-05	0.000230191	0.0873	0.1444	up
OsTN1g004271	4	5	4	43	13	39	5	35	7.1	2.828	2.38968344822587e-05	0.000417103	0.2004	0.2059	up
OsTN1g004283	1960	285	1050	407	144	122	1071	228	0.213	-2.23	0.00029739	0.00325645	0.248	0.1828	down
OsTN1g004285	0	0	0	7	21	0	0	13	99.855	6.642	4.28147838489186e-05	0.000667582	0.6274	0.3478	up
OsTN1g004291	47	22	20	19	4	9	31	11	0.362	-1.468	0.00362154	0.0247669	0.1189	0.2082	down
OsTN1g004292	51	131	55	24	15	24	96	25	0.255	-1.974	0.000806004	0.0073511	0.2079	0.1691	down
OsTN1g004295	0	0	0	6	6	1	0	5	40.732	5.348	0.00389304	0.0262846	1.0246	1.4961	up
OsTN1g004299	117	51	68	39	8	28	82	26	0.324	-1.624	9.16851381605992e-05	0.00123765	0.0945	0.168	down
OsTN1g004308	46	13	46	136	53	52	36	84	2.29	1.195	0.00298142	0.0212242	0.0941	0.1546	up
OsTN1g004313	74	27	13	549	161	104	38	263	6.908	2.788	1.26148654258838e-08	6.36960597825521e-07	0.1409	0.1159	up
OsTN1g004317	33	12	29	163	47	43	26	83	3.217	1.686	9.7449941827683e-05	0.00130386	0.1051	0.1693	up
OsTN1g004331	128	76	98	614	594	238	108	567	5.226	2.386	1.63094082536245e-07	6.01519340581939e-06	0.1305	0.1517	up
OsTN1g004333	15	3	24	2	0	0	15	0	0.052	-4.277	0.000430401	0.00441156	0.5593	0.7727	down
OsTN1g004334	26	7	35	1	0	0	24	0	0.019	-5.714	2.40204708496245e-05	0.000418065	0.6105	0.5277	down
OsTN1g004339	141	94	67	3	0	7	108	4	0.036	-4.802	8.10956100476172e-15	1.71979460227982e-12	0.1444	0.1822	down
OsTN1g004340	16	12	6	3	0	2	12	2	0.152	-2.715	0.00194603	0.0150506	0.2837	0.4864	down
OsTN1g004347	60	44	38	261	110	53	52	144	2.815	1.493	7.68874166284418e-05	0.00107333	0.0856	0.1186	up
OsTN1g004349	1	2	4	2	16	19	3	17	6.186	2.629	0.00870422	0.0488593	0.4898	0.2017	up
OsTN1g004355	21	18	7	96	51	33	17	65	3.869	1.952	7.96365583615172e-05	0.0011031	0.131	0.1957	up
OsTN1g004359	34	24	28	751	230	157	32	371	11.913	3.574	6.57281951229576e-16	1.81025692723709e-13	0.1046	0.126	up
OsTN1g004365	109	31	35	827	200	116	57	355	6.127	2.615	8.24241351766932e-08	3.32946406608025e-06	0.145	0.137	up
OsTN1g004369	143	64	69	45	11	21	95	26	0.279	-1.844	2.61301460771009e-05	0.000446889	0.1084	0.1468	down
OsTN1g004377	271	158	152	96	35	62	206	69	0.338	-1.565	1.42782966871772e-06	3.99999785792558e-05	0.0629	0.115	down
OsTN1g004413	1354	830	1182	380	208	452	1214	405	0.334	-1.584	0.000117067	0.00151104	0.1144	0.1891	down
OsTN1g004415	18	45	73	52	209	164	54	196	3.625	1.858	0.00148323	0.0121073	0.2192	0.1152	up
OsTN1g004417	38	41	29	10	9	8	41	11	0.26	-1.944	0.00099157	0.00871095	0.178	0.2065	down
OsTN1g004433	41	60	38	7	8	21	54	16	0.28	-1.837	0.00221346	0.0166694	0.2008	0.2044	down
OsTN1g004441	24	30	26	0	0	2	30	1	0.03	-5.076	2.78602733642579e-06	7.0170168317793e-05	0.4002	0.3354	down
OsTN1g004449	68	36	107	536	469	799	77	737	9.573	3.259	1.86682429958746e-12	2.39937835886978e-10	0.1247	0.1551	up
OsTN1g004450	16	3	13	123	62	102	11	108	9.647	3.27	6.50157075621996e-11	6.10083234633436e-09	0.1212	0.1795	up
OsTN1g004472	40	25	40	106	75	43	38	84	2.204	1.14	0.00815195	0.0465699	0.1105	0.1591	up
OsTN1g004478	8	2	7	98	33	7	6	44	7.34	2.876	4.83689656591807e-05	0.000732686	0.2521	0.2054	up
OsTN1g004494	1	1	0	2	12	3	1	8	9.319	3.22	0.00746588	0.0435448	0.5216	0.5116	up
OsTN1g004505	32	24	16	151	94	85	26	124	4.753	2.249	8.06387431166959e-09	4.34037011491312e-07	0.0803	0.1358	up
OsTN1g004506	123	201	160	674	758	781	189	914	4.834	2.273	1.55239760520525e-05	0.000290828	0.1788	0.1827	up
OsTN1g004507	8	6	13	62	35	49	10	55	5.525	2.466	3.66710671478663e-06	8.77746411969301e-05	0.1371	0.2016	up
OsTN1g004508	4	4	4	13	16	16	5	19	4.083	2.03	0.00727169	0.0426704	0.2644	0.2939	up
OsTN1g004509	19	12	16	77	34	43	17	56	3.284	1.715	0.000168599	0.00203963	0.1063	0.1819	up
OsTN1g004529	2007	700	1581	29	69	326	1485	191	0.129	-2.96	0.000101398	0.00134733	0.3577	0.1891	down
OsTN1g004544	41	41	11	9	0	1	34	2	0.095	-3.394	9.16671404746651e-06	0.000187462	0.2598	0.2182	down
OsTN1g004566	36	23	28	16	1	9	31	8	0.287	-1.802	0.00118588	0.0100395	0.1469	0.2168	down
OsTN1g004569	56	34	37	3	1	5	45	4	0.077	-3.696	2.67720710688145e-07	9.35346476369603e-06	0.2132	0.2244	down
OsTN1g004570	957	2107	681	60	54	293	1506	176	0.117	-3.101	1.74800654652672e-05	0.000321509	0.3174	0.1805	down
OsTN1g004571	64	78	23	1	6	3	63	5	0.069	-3.854	3.07729802893446e-07	1.05770274391593e-05	0.2497	0.2052	down
OsTN1g004577	1	1	1	24	18	4	1	17	14.05	3.812	0.000179565	0.002149	0.3866	0.2118	up
OsTN1g004583	0	0	0	0	0	12	0	5	43.827	5.454	0.00640205	0.0386915	1.3858	0.2018	up
OsTN1g004601	26	4	11	60	51	101	13	87	6.328	2.662	1.22964238872806e-05	0.00024012	0.2062	0.1878	up
OsTN1g004602	158	36	107	6	4	4	101	5	0.053	-4.237	1.83577489243587e-06	4.94282675885195e-05	0.3855	0.1295	down
OsTN1g004609	78	30	60	199	161	188	58	218	3.691	1.884	2.94871502635909e-05	0.000493555	0.1274	0.1171	up
OsTN1g004631	28	18	17	15	3	4	23	7	0.335	-1.577	0.00405321	0.0271756	0.1274	0.2447	down
OsTN1g004635	43	64	40	29	14	18	57	23	0.397	-1.332	0.00864192	0.048594	0.1467	0.1962	down
OsTN1g004638	13	14	5	0	0	0	12	0	0.01	-6.587	3.96700751253415e-05	0.00062965	0.5816	0.4793	down
OsTN1g004639	24	20	20	3	0	3	23	2	0.095	-3.393	0.00428209	0.0284583	0.7113	0.2461	down
OsTN1g004640	3	7	2	0	0	0	5	0	0.026	-5.286	0.00557267	0.0348716	1.1139	1.5454	down
OsTN1g004641	2045	3027	1308	177	298	473	2473	414	0.167	-2.581	0.000533476	0.00525228	0.3548	0.1885	down
OsTN1g004642	51	31	60	26	7	20	51	19	0.371	-1.429	0.00572156	0.0355619	0.1498	0.2024	down
OsTN1g004646	646	212	430	399	79	157	441	208	0.474	-1.077	0.00516172	0.0327347	0.101	0.1615	down
OsTN1g004662	4531	1628	2871	563	321	1320	3102	903	0.291	-1.782	0.000452105	0.00458746	0.1745	0.1778	down
OsTN1g004664	80	39	737	0	0	10	328	5	0.014	-6.184	3.26132483225437e-06	7.99571279972468e-05	0.772	0.1407	down
OsTN1g004666	11	0	23	0	0	0	12	0	0.01	-6.596	0.00376765	0.0255702	1.9171	1.2939	down
OsTN1g004678	72	74	44	190	197	98	71	193	2.72	1.444	0.00119248	0.0100913	0.1273	0.1156	up
OsTN1g004683	24	4	30	105	56	19	20	63	3.107	1.636	0.00255841	0.0187608	0.172	0.203	up
OsTN1g004689	42	45	40	28	7	13	48	16	0.349	-1.518	0.00743151	0.043416	0.183	0.2025	down
OsTN1g004713	124	15	87	42	13	9	74	21	0.287	-1.8	0.000265102	0.00295584	0.1389	0.1847	down
OsTN1g004722	50	23	49	268	78	91	43	146	3.381	1.757	9.55696247013805e-06	0.000193576	0.0936	0.1377	up
OsTN1g004730	46	34	31	16	0	8	40	7	0.203	-2.298	1.83133462285231e-05	0.000334226	0.1314	0.2049	down
OsTN1g004744	4466	1376	1340	8920	8620	2239	2370	7673	3.237	1.695	0.00176287	0.013903	0.2002	0.1388	up
OsTN1g004755	21	16	32	691	447	2774	25	1660	64.715	6.016	3.56209827096194e-13	5.47401579944129e-11	0.3124	0.1591	up
OsTN1g004756	165	63	124	313	96	275	122	250	2.039	1.028	0.00370968	0.0252556	0.0822	0.1171	up
OsTN1g004760	32	23	8	10	0	2	22	3	0.172	-2.54	0.00195931	0.0151205	0.3324	0.2331	down
OsTN1g004761	205	85	67	48	19	12	121	27	0.225	-2.15	6.12409755771227e-07	1.92405536157636e-05	0.104	0.156	down
OsTN2g000001	146	96	105	85	32	42	125	56	0.452	-1.144	0.000701507	0.00657602	0.0665	0.1308	down
OsTN2g000015	293	207	92	920	283	486	211	589	2.787	1.479	0.000663401	0.0062863	0.1273	0.1743	up
OsTN2g000035	1054	589	386	2565	960	833	710	1495	2.107	1.075	0.00731207	0.0428717	0.1121	0.1864	up
OsTN2g000036	48	43	30	21	7	12	45	14	0.323	-1.629	0.00101623	0.00890093	0.1246	0.2028	down
OsTN2g000038	1	3	3	23	20	81	3	53	19.001	4.248	6.21094550773644e-08	2.59793927776265e-06	0.2502	0.1169	up
OsTN2g000039	0	0	0	2	5	12	0	8	66.245	6.05	3.03885753977525e-05	0.000507042	0.348	0.5186	up
OsTN2g000053	0	0	0	8	6	985	0	452	3619.82	11.822	2.64503428047267e-08	1.20890607728414e-06	1.1137	0.1159	up
OsTN2g000054	1	0	0	26	51	4438	0	2049	4488.5	12.132	3.80128615841683e-11	3.71492514108506e-09	0.8765	0.1771	up
OsTN2g000057	74	35	36	105	117	161	50	159	3.145	1.653	0.00165571	0.0132102	0.1765	0.1178	up
OsTN2g000060	32	20	2	97	57	34	19	68	3.623	1.857	0.000655097	0.0062243	0.1708	0.1786	up
OsTN2g000061	67	178	62	288	485	234	125	430	3.443	1.784	0.00053669	0.00527855	0.1748	0.1464	up
OsTN2g000074	69	36	27	16	13	20	46	19	0.416	-1.264	0.00603577	0.0370694	0.1091	0.2028	down
OsTN2g000113	9	14	6	27	70	56	11	68	6.079	2.604	0.00275725	0.0199294	0.4436	0.1462	up
OsTN2g000114	6	24	6	8	83	67	15	76	5.061	2.339	0.00470454	0.0305308	0.4117	0.1742	up
OsTN2g000115	47	36	70	290	126	87	57	175	3.097	1.631	5.27218779110997e-05	0.00078793	0.1002	0.1199	up
OsTN2g000116	299	515	613	1535	1270	1011	560	1493	2.667	1.415	0.00400407	0.0269142	0.1664	0.1892	up
OsTN2g000120	0	0	0	14	10	1	0	9	73.202	6.194	0.000695447	0.00653449	0.9714	0.9513	up
OsTN2g000124	26830	17244	9663	987	433	515	19049	697	0.037	-4.772	2.68383757252944e-31	1.13832286801264e-27	0.0879	0.1225	down
OsTN2g000128	0	0	1	51	26	2	0	27	55.081	5.783	1.29604291705466e-06	3.6549444337737e-05	0.432	0.2597	up
OsTN2g000129	26	14	9	97	21	17	17	42	2.491	1.317	0.00682042	0.0405383	0.127	0.2045	up
OsTN2g000131	3	3	0	9	17	5	2	13	5.638	2.495	0.00143602	0.0117992	0.2058	0.2291	up
OsTN2g000167	4	0	0	14	10	32	1	23	16.312	4.028	0.000117304	0.00151318	0.4604	0.2194	up
OsTN2g000175	131	111	31	52	26	3	99	27	0.28	-1.838	0.00179311	0.0140943	0.2133	0.1734	down
OsTN2g000188	60	57	29	104	94	159	54	147	2.705	1.435	0.000866435	0.0077858	0.1155	0.1281	up
OsTN2g000189	129	236	93	29	31	64	181	52	0.287	-1.803	0.000820465	0.00744846	0.1839	0.1243	down
OsTN2g000191	1984	721	1715	543	149	241	1541	317	0.206	-2.277	8.07203349113913e-07	2.43177923775789e-05	0.1382	0.1882	down
OsTN2g000211	580	261	366	1904	688	433	421	1013	2.405	1.266	0.00192164	0.0149025	0.1147	0.1892	up
OsTN2g000215	116	76	122	28	21	56	114	43	0.372	-1.426	0.00144723	0.0118637	0.1215	0.1414	down
OsTN2g000216	0	0	0	7	30	6	0	20	156.921	7.294	9.07193588504276e-08	3.59604755727293e-06	0.3412	0.209	up
OsTN2g000217	142	119	55	519	233	351	115	406	3.525	1.818	1.20782080401145e-05	0.00023695	0.1116	0.1479	up
OsTN2g000218	517	1234	437	2504	2603	3201	885	3419	3.864	1.95	0.000482508	0.00483351	0.209	0.1702	up
OsTN2g000224	305	106	369	152	67	54	276	96	0.349	-1.519	0.000428561	0.00440169	0.1213	0.1183	down
OsTN2g000238	66	57	59	63	11	10	67	25	0.399	-1.326	0.00184054	0.0143925	0.1015	0.1788	down
OsTN2g000247	6	4	6	25	14	29	6	27	4.467	2.159	0.000760324	0.00702579	0.1868	0.2075	up
OsTN2g000250	69	33	23	7	1	1	43	3	0.074	-3.761	1.13425576661302e-09	7.58806373582404e-08	0.136	0.2011	down
OsTN2g000261	47	56	26	13	3	8	49	8	0.177	-2.498	1.47405374951506e-05	0.000278116	0.1611	0.2036	down
OsTN2g000308	60	33	47	16	3	6	50	8	0.172	-2.537	1.74493711268826e-05	0.000321223	0.1738	0.2027	down
OsTN2g000310	255	129	235	593	286	447	221	495	2.24	1.164	0.00104652	0.00909941	0.085	0.1528	up
OsTN2g000314	74	47	38	48	9	15	57	23	0.421	-1.249	0.00748216	0.0436158	0.1236	0.192	down
OsTN2g000321	0	0	6	20	9	13	2	15	6.507	2.702	0.00390142	0.0263157	0.391	0.388	up
OsTN2g000332	14	3	3	96	21	8	6	38	5.68	2.506	0.000336394	0.00359754	0.2555	0.202	up
OsTN2g000349	240	180	149	319	400	396	207	466	2.249	1.169	0.00320271	0.0225049	0.1066	0.1596	up
OsTN2g000352	276	164	197	1352	318	362	228	654	2.876	1.524	0.000366023	0.00385414	0.1233	0.1676	up
OsTN2g000365	1488	88	995	1841	2031	2379	831	2587	3.111	1.637	0.00791743	0.0454288	0.2597	0.1836	up
OsTN2g000391	313	334	271	68	84	54	346	85	0.243	-2.04	4.12917439189285e-06	9.71891246713337e-05	0.1235	0.1289	down
OsTN2g000392	186	79	100	65	19	12	126	31	0.253	-1.982	3.83357627754325e-07	1.27828069367704e-05	0.0853	0.1363	down
OsTN2g000429	46	28	25	137	76	64	35	102	2.876	1.524	0.000313319	0.00338662	0.1048	0.1549	up
OsTN2g000437	581	789	138	1820	1881	2969	579	2771	4.792	2.261	5.55714261883667e-05	0.00081906	0.2058	0.1649	up
OsTN2g000442	1	0	0	12	7	11	0	12	24.242	4.599	7.24485110437684e-06	0.000156299	0.2112	0.3486	up
OsTN2g000447	195	226	137	40	29	44	211	45	0.21	-2.253	8.65726427622836e-08	3.45102638169126e-06	0.1038	0.125	down
OsTN2g000449	35	43	26	101	117	103	39	132	3.35	1.744	5.48143399441936e-05	0.000810136	0.1108	0.1298	up
OsTN2g000462	37	87	22	0	1	1	59	1	0.015	-6.036	3.61739349429942e-11	3.60159924101445e-09	0.241	0.2039	down
OsTN2g000463	16	63	17	0	2	4	40	3	0.067	-3.907	3.93423284945962e-05	0.000626376	0.3994	0.2206	down
OsTN2g000473	0	0	0	2	6	7	0	7	53.181	5.733	0.000392206	0.00408562	0.5628	0.7471	up
OsTN2g000485	56	29	41	38	5	8	45	15	0.367	-1.445	0.00305807	0.0217043	0.1269	0.2028	down
OsTN2g000490	47	23	47	128	74	58	42	96	2.282	1.19	0.00169943	0.013501	0.0832	0.1546	up
OsTN2g000491	0	0	0	10	0	0	0	2	23.26	4.54	0.00818057	0.0466735	0.7082	1.0157	up
OsTN2g000492	45	44	29	3	2	7	44	5	0.109	-3.197	1.59812128456381e-06	4.38439302480528e-05	0.1917	0.2198	down
OsTN2g000494	27	27	22	116	52	48	29	77	2.734	1.451	0.00044466	0.0045293	0.094	0.1966	up
OsTN2g000511	26	51	40	119	142	123	46	159	3.447	1.785	0.000206832	0.00239557	0.143	0.1297	up
OsTN2g000512	45	15	18	126	52	39	26	75	2.824	1.498	0.000181575	0.00216694	0.0869	0.1679	up
OsTN2g000513	142	191	93	387	566	370	164	558	3.411	1.77	0.000185349	0.00220331	0.1484	0.1553	up
OsTN2g000519	127	59	79	386	118	129	92	213	2.298	1.201	0.00213413	0.0161522	0.0994	0.1178	up
OsTN2g000534	3	15	10	57	80	92	12	97	8.6	3.104	2.61017790101493e-07	9.14942855319397e-06	0.1869	0.141	up
OsTN2g000536	144	92	100	117	28	36	121	59	0.498	-1.005	0.00606628	0.0371814	0.0819	0.1316	down
OsTN2g000543	38	24	67	108	67	174	48	140	2.935	1.554	0.0066004	0.0395632	0.2113	0.129	up
OsTN2g000561	81	68	60	61	14	17	77	30	0.402	-1.314	0.00045933	0.004643	0.0757	0.156	down
OsTN2g000562	287	145	93	13	7	11	181	12	0.064	-3.958	5.26825433265115e-15	1.17604073297403e-12	0.1195	0.1155	down
OsTN2g000593	16	16	28	8	2	9	23	7	0.316	-1.663	0.00581286	0.0360027	0.1615	0.2127	down
OsTN2g000594	204	148	214	102	31	77	207	76	0.366	-1.45	5.44400050103325e-05	0.000807349	0.0802	0.115	down
OsTN2g000605	29	21	15	54	46	50	23	60	2.522	1.335	0.0051222	0.0325502	0.1279	0.1874	up
OsTN2g000615	14	11	26	508	242	122	19	304	16.045	4.004	3.75388892369553e-16	1.06144963206415e-13	0.1211	0.115	up
OsTN2g000626	356	360	349	3551	2020	821	400	2282	5.707	2.513	2.44694150911238e-07	8.61998149231667e-06	0.1515	0.1868	up
OsTN2g000643	104	217	18	37	2	24	136	21	0.156	-2.68	0.000321955	0.00346584	0.3333	0.1912	down
OsTN2g000650	370	61	252	100	38	59	227	71	0.312	-1.683	8.17196187318293e-05	0.00112607	0.1157	0.1172	down
OsTN2g000661	39	1	9	91	54	40	15	68	4.499	2.169	0.00196571	0.0151478	0.2958	0.1942	up
OsTN2g000671	1	1	0	7	14	8	1	13	14.802	3.888	0.000790771	0.00725654	0.4834	0.2045	up
OsTN2g000702	52	21	15	156	41	46	30	80	2.672	1.418	0.00051903	0.00513416	0.0944	0.1746	up
OsTN2g000704	11	0	4	45	47	28	5	48	9.405	3.233	6.7491158322257e-07	2.0864212748398e-05	0.1932	0.2047	up
OsTN2g000706	102	54	63	154	175	137	78	191	2.455	1.296	0.00521771	0.0330206	0.1407	0.1153	up
OsTN2g000710	50	66	26	129	101	134	54	145	2.67	1.417	0.00433314	0.0286807	0.1576	0.1358	up
OsTN2g000718	2	1	0	22	43	23	1	38	32.09	5.004	1.57781870391586e-08	7.76352697307276e-07	0.2577	0.1924	up
OsTN2g000743	0	0	0	0	1	24	0	12	91.132	6.51	0.000302444	0.00329397	0.9183	0.2359	up
OsTN2g000745	108	84	125	36	37	34	117	43	0.364	-1.457	0.000180352	0.00215477	0.0874	0.1488	down
OsTN2g000746	26	18	25	0	2	0	25	1	0.036	-4.788	1.31520729782202e-06	3.70406389972264e-05	0.301	0.2491	down
OsTN2g000773	91	68	81	79	7	37	88	39	0.461	-1.116	0.00855219	0.0482614	0.1086	0.1555	down
OsTN2g000809	484	268	244	78	72	96	351	100	0.283	-1.82	3.86323995960385e-05	0.000616461	0.1259	0.1178	down
OsTN2g000817	14	9	13	27	30	81	13	59	4.461	2.157	0.000515256	0.00511105	0.2157	0.2017	up
OsTN2g000818	31	10	37	91	53	114	27	101	3.638	1.863	2.46665178952903e-05	0.000427211	0.1109	0.158	up
OsTN2g000821	28	5	24	226	119	61	19	144	7.342	2.876	3.35250383220215e-07	1.13754478031218e-05	0.1791	0.1432	up
OsTN2g000830	63	62	69	47	6	14	73	21	0.295	-1.76	0.00365049	0.0249247	0.2232	0.1885	down
OsTN2g000836	28	37	24	251	233	81	34	219	6.464	2.692	3.12387446232225e-08	1.40059208715577e-06	0.1367	0.1215	up
OsTN2g000838	263	244	192	16	2	62	260	33	0.127	-2.979	7.63585214822768e-05	0.00106746	0.3385	0.1152	down
OsTN2g000839	607	1221	394	18	25	147	887	84	0.095	-3.399	0.000359127	0.00380041	0.5375	0.178	down
OsTN2g000854	0	0	0	0	0	22	0	10	80.071	6.323	0.00138306	0.0114083	1.2731	0.4026	up
OsTN2g000860	475	454	258	2	9	25	441	16	0.036	-4.791	7.0195273265357e-14	1.25095055473817e-11	0.1972	0.1338	down
OsTN2g000861	215	135	114	32	19	68	165	49	0.29	-1.785	0.000115338	0.00148963	0.1319	0.1328	down
OsTN2g000873	1386	779	1227	754	227	328	1216	448	0.369	-1.437	8.95874105360851e-05	0.00121631	0.0917	0.1892	down
OsTN2g000876	5	6	6	192	49	9	6	76	11.867	3.569	4.08286600481667e-07	1.35078532549371e-05	0.2433	0.1865	up
OsTN2g000895	15	96	6	0	0	9	51	4	0.08	-3.646	0.00531694	0.0334886	0.9211	0.3088	down
OsTN2g000896	6	20	5	0	0	1	13	0	0.04	-4.628	0.00199615	0.0153267	0.8387	0.6932	down
OsTN2g000900	15	77	36	0	0	4	54	2	0.033	-4.902	9.67715105234489e-05	0.00129642	0.7	0.2765	down
OsTN2g000905	27	15	6	2	3	1	17	2	0.143	-2.805	0.000386538	0.00403411	0.228	0.4159	down
OsTN2g000951	5	1	6	16	8	15	4	15	3.387	1.76	0.00895551	0.0499656	0.1791	0.3675	up
OsTN2g000956	0	0	0	0	0	21	0	10	76.289	6.253	0.000907396	0.00810526	1.0816	0.2057	up
OsTN2g000959	246	225	108	58	37	69	213	65	0.301	-1.732	2.39925357363544e-05	0.000418065	0.1042	0.115	down
OsTN2g000970	90	124	83	362	365	159	114	350	3.067	1.617	0.000297484	0.00325645	0.131	0.1237	up
OsTN2g001001	5	24	9	1	1	2	16	2	0.106	-3.24	0.00240392	0.0178241	0.4864	0.2503	down
OsTN2g001013	414	140	311	130	62	85	298	102	0.342	-1.547	0.000969504	0.00854897	0.1448	0.1185	down
OsTN2g001035	206	210	82	157	25	60	186	78	0.426	-1.231	0.00617295	0.0376936	0.1325	0.1151	down
OsTN2g001039	84	156	70	13	24	29	123	29	0.232	-2.105	0.00162773	0.0130507	0.2752	0.1675	down
OsTN2g001048	0	0	0	6	3	2	0	4	32.439	5.02	0.00190525	0.014822	0.5005	0.8461	up
OsTN2g001051	11	15	0	580	285	288	10	419	43.076	5.429	3.95733504273357e-22	4.19616021256254e-19	0.1354	0.1153	up
OsTN2g001056	332	82	334	139	32	39	258	68	0.266	-1.91	3.29527180432326e-06	8.03250909819349e-05	0.1056	0.117	down
OsTN2g001095	7	6	16	0	0	1	11	0	0.046	-4.439	0.00022754	0.00260131	0.405	0.9392	down
OsTN2g001151	7	7	4	1	0	0	7	0	0.068	-3.872	0.00333564	0.0232847	0.5341	1.3413	down
OsTN2g001152	18	8	14	0	2	1	14	1	0.095	-3.394	0.000936224	0.00829344	0.3893	0.7447	down
OsTN2g001154	52	75	152	42	9	7	108	18	0.172	-2.543	0.000122667	0.00156523	0.2587	0.1579	down
OsTN2g001156	11	16	24	0	0	0	20	0	0.006	-7.301	9.78424284411599e-08	3.83674004302816e-06	0.3383	0.2625	down
OsTN2g001157	102	33	59	10	8	4	66	8	0.126	-2.991	2.00626270728178e-06	5.29848234537046e-05	0.197	0.1982	down
OsTN2g001159	654	621	443	77	94	80	639	104	0.162	-2.63	2.13565507120524e-09	1.33601289365928e-07	0.1181	0.1637	down
OsTN2g001174	0	0	0	4	25	18	0	22	176.482	7.463	7.97757317103564e-06	0.000168339	0.7098	0.827	up
OsTN2g001179	6	3	13	0	0	0	8	0	0.015	-6.033	7.93043630944903e-05	0.00110066	0.4446	0.9307	down
OsTN2g001190	37	79	13	216	155	195	52	222	4.314	2.109	5.33078819047071e-05	0.000795567	0.1696	0.115	up
OsTN2g001217	35	27	8	86	64	44	25	74	2.934	1.553	0.00136697	0.0113019	0.1359	0.1844	up
OsTN2g001225	0	1	4	17	21	311	2	156	75.705	6.242	2.09394279556647e-06	5.48902903159186e-05	0.721	0.1861	up
OsTN2g001234	18	13	4	139	30	90	13	90	7.177	2.843	3.42730377532112e-06	8.26880900605631e-05	0.2034	0.1643	up
OsTN2g001239	1	0	0	9	18	12	0	17	35.567	5.152	3.89128526047644e-06	9.23070319003623e-05	0.3296	0.259	up
OsTN2g001249	9	0	2	8	4	58	3	30	8.594	3.103	0.00852897	0.0481956	0.7743	0.2076	up
OsTN2g001263	118	34	65	176	108	111	73	149	2.016	1.012	0.00600768	0.0369182	0.0852	0.123	up
OsTN2g001282	8	3	19	2	0	1	11	1	0.104	-3.263	0.00437556	0.0288951	0.5385	0.5959	down
OsTN2g001284	50	37	75	7	4	6	60	6	0.108	-3.209	2.24669777668228e-06	5.83602204012809e-05	0.2222	0.2105	down
OsTN2g001307	11	25	7	4	2	1	17	2	0.153	-2.705	0.00110239	0.00948796	0.281	0.2897	down
OsTN2g001310	75	31	61	19	2	20	58	15	0.254	-1.977	0.000163188	0.00198617	0.147	0.2027	down
OsTN2g001311	806	282	693	272	78	190	619	192	0.311	-1.686	0.000100268	0.0013365	0.1251	0.1627	down
OsTN2g001316	55	27	46	313	122	144	46	204	4.489	2.166	2.38989296655745e-10	1.91460988208776e-08	0.066	0.1166	up
OsTN2g001317	498	884	1345	116	148	131	1071	165	0.154	-2.703	2.35577218382557e-06	6.07033544378966e-05	0.2051	0.1743	down
OsTN2g001318	103	100	152	24	32	14	134	29	0.213	-2.231	0.000197077	0.00232103	0.2163	0.1656	down
OsTN2g001335	156	37	73	16	10	9	88	13	0.148	-2.753	7.34018260294549e-07	2.24298634669546e-05	0.1619	0.1818	down
OsTN2g001346	1	1	6	24	7	10	3	14	4.59	2.199	0.00785247	0.0451744	0.299	0.2927	up
OsTN2g001347	95	77	57	537	110	144	84	251	3.024	1.596	5.30122332898073e-05	0.000791712	0.0995	0.1222	up
OsTN2g001360	0	0	21	86	254	185	8	238	28.879	4.852	9.70456880352676e-07	2.8544353760942e-05	0.4844	0.1224	up
OsTN2g001362	108	87	61	947	235	90	93	390	4.192	2.068	1.18427262316014e-05	0.000232977	0.1427	0.1421	up
OsTN2g001398	254	309	246	129	85	122	309	131	0.423	-1.24	0.00181184	0.0142205	0.1045	0.1272	down
OsTN2g001536	1	0	3	25	15	13	2	20	12.643	3.66	6.64684753736455e-05	0.000949863	0.3177	0.4848	up
OsTN2g001555	8	34	5	160	62	23	20	81	4.156	2.055	0.00655332	0.0393812	0.352	0.1901	up
OsTN2g001584	0	0	0	28	21	0	0	18	142.252	7.152	8.10954926169962e-07	2.43596616420487e-05	0.4293	0.2875	up
OsTN2g001612	62	10	136	11	22	11	74	19	0.251	-1.992	0.00428859	0.0284925	0.293	0.1966	down
OsTN2g001663	263	145	158	154	65	60	200	98	0.492	-1.024	0.00318036	0.0223849	0.077	0.1155	down
OsTN2g001694	9	3	4	39	29	43	5	44	7.768	2.958	2.2620021832523e-05	0.000398755	0.2374	0.2072	up
OsTN2g001719	1	2	0	4	17	9	1	14	11.048	3.466	0.00207071	0.0157963	0.5145	0.486	up
OsTN2g001740	13	12	4	2	0	3	11	2	0.183	-2.447	0.00887784	0.0496106	0.3466	0.5445	down
OsTN2g001800	2	2	14	0	0	0	7	0	0.018	-5.808	0.00100409	0.00880635	0.8193	1.215	down
OsTN2g001816	2757	1407	1157	1106	600	467	1851	791	0.427	-1.227	0.000973386	0.00857607	0.0958	0.185	down
OsTN2g001879	16	18	7	6	0	1	15	2	0.149	-2.745	0.00778365	0.0448676	0.5231	0.743	down
OsTN2g001880	40	33	16	3	4	1	32	3	0.097	-3.368	7.48222430788543e-07	2.27654994113811e-05	0.1707	0.2211	down
OsTN2g001885	99	140	39	5	28	19	107	25	0.224	-2.157	0.00359197	0.0246202	0.3375	0.1743	down
OsTN2g001899	55	36	72	160	127	187	60	190	3.169	1.664	1.46422771907757e-05	0.000276508	0.09	0.1182	up
OsTN2g001907	30	18	9	48	49	35	20	53	2.604	1.381	0.00567814	0.0353958	0.1388	0.1979	up
OsTN2g001940	86	35	35	12	0	6	53	6	0.115	-3.115	4.78070057985066e-07	1.54079509417771e-05	0.1781	0.2029	down
OsTN2g001959	0	0	0	0	0	16	0	7	58.455	5.869	0.00519547	0.0329093	1.6097	0.1991	up
OsTN2g001985	276	138	116	6	4	14	184	10	0.051	-4.289	2.16414026533797e-19	1.2404033137033e-16	0.0958	0.1261	down
OsTN2g001989	22	10	14	48	31	58	16	54	3.313	1.728	0.00418935	0.0279202	0.2116	0.2019	up
OsTN2g001995	38	41	30	104	90	50	41	95	2.312	1.209	0.00810752	0.0463565	0.1273	0.1194	up
OsTN2g002017	224	13	567	37	15	28	288	30	0.103	-3.285	6.83588428559163e-05	0.000972291	0.3985	0.1254	down
OsTN2g002025	75	78	69	24	24	34	84	34	0.397	-1.333	0.00161773	0.0129903	0.1013	0.173	down
OsTN2g002031	68	40	33	132	123	84	50	134	2.666	1.415	0.000236784	0.00268816	0.0888	0.1487	up
OsTN2g002059	22	18	5	127	44	36	16	70	4.303	2.105	0.000652602	0.00620338	0.2217	0.1819	up
OsTN2g002085	220	68	160	64	54	40	153	62	0.398	-1.329	0.00169461	0.0134749	0.1127	0.1151	down
OsTN2g002093	77	29	22	10	2	2	43	4	0.112	-3.158	7.45286089154644e-07	2.27087386389404e-05	0.1784	0.2162	down
OsTN2g002097	161	40	117	414	154	179	108	261	2.412	1.27	0.00155613	0.0126198	0.1062	0.1152	up
OsTN2g002127	11	2	2	28	31	1	5	23	4.625	2.21	0.008105	0.0463546	0.3697	0.2347	up
OsTN2g002129	36	52	46	21	11	5	52	13	0.257	-1.961	0.00051633	0.00511913	0.1712	0.2058	down
OsTN2g002130	99	35	38	25	15	9	58	18	0.308	-1.697	0.00218944	0.0165178	0.175	0.1889	down
OsTN2g002151	0	0	0	0	0	9	0	4	32.831	5.037	0.00876662	0.0491186	1.1919	0.5424	up
OsTN2g002166	451	223	294	60	3	27	340	28	0.086	-3.544	3.73396255390732e-12	4.49921272049503e-10	0.1426	0.1227	down
OsTN2g002167	752	722	696	56	31	63	811	58	0.072	-3.803	1.07638559288533e-11	1.16463822797547e-09	0.1744	0.1756	down
OsTN2g002172	12	7	6	23	55	8	9	38	4.17	2.06	0.00409102	0.0273858	0.2838	0.208	up
OsTN2g002206	105	0	248	1	0	2	125	1	0.01	-6.638	0.000100994	0.0013445	1.1875	0.1212	down
OsTN2g002223	73	46	52	53	10	11	61	23	0.392	-1.352	0.00213791	0.0161668	0.1076	0.1943	down
OsTN2g002225	20	21	2	88	59	11	16	57	3.584	1.842	0.00569004	0.0354381	0.2635	0.1988	up
OsTN2g002238	649	281	349	1392	515	654	442	900	2.034	1.024	0.00542956	0.0340766	0.094	0.1884	up
OsTN2g002243	6	9	2	68	33	9	7	38	5.855	2.55	0.000187785	0.00223102	0.2306	0.195	up
OsTN2g002259	24	10	15	44	54	57	17	65	3.74	1.903	0.00328923	0.0229834	0.2499	0.1666	up
OsTN2g002260	131	92	68	708	373	168	105	441	4.214	2.075	7.30988394758232e-07	2.2369510660372e-05	0.1116	0.149	up
OsTN2g002261	8	3	4	34	15	12	5	21	4.032	2.012	0.000280194	0.00309645	0.1102	0.2158	up
OsTN2g002270	15	60	9	393	187	36	36	209	5.94	2.57	0.000368152	0.00387272	0.3201	0.1151	up
OsTN2g002272	63	64	49	258	92	92	66	152	2.322	1.215	0.00206484	0.0157795	0.0976	0.1226	up
OsTN2g002285	93	40	25	0	16	4	53	10	0.182	-2.457	0.00696425	0.0412084	0.4807	0.2012	down
OsTN2g002289	76	59	38	215	84	77	63	130	2.091	1.064	0.00150145	0.0122325	0.0669	0.1309	up
OsTN2g002305	13	12	11	17	5	140	14	70	5.222	2.385	0.0050445	0.0321837	0.4356	0.2027	up
OsTN2g002328	18	4	82	1	1	0	39	1	0.022	-5.505	2.2220185186024e-07	7.90764098306687e-06	0.3755	0.1898	down
OsTN2g002330	231	77	250	101	26	61	196	65	0.336	-1.572	0.000117386	0.00151331	0.1046	0.1157	down
OsTN2g002332	49	68	173	1	0	1	112	1	0.008	-7.051	3.43992859513425e-16	9.85818455635297e-14	0.2067	0.1739	down
OsTN2g002334	3	0	31	0	0	0	13	0	0.01	-6.699	4.05430430068042e-05	0.000638779	0.628	0.3108	down
OsTN2g002344	207	106	87	485	212	242	139	337	2.416	1.273	0.000196865	0.00232069	0.0765	0.135	up
OsTN2g002345	385	429	256	689	788	824	404	953	2.359	1.238	0.00568489	0.0354274	0.1384	0.1827	up
OsTN2g002349	242	110	142	55	7	17	172	24	0.148	-2.759	2.62353399250178e-07	9.18107019455201e-06	0.1657	0.1424	down
OsTN2g002358	116	74	61	1852	447	298	89	812	9.072	3.181	1.10877761473556e-11	1.19025638343461e-09	0.1295	0.1802	up
OsTN2g002360	80	61	35	209	108	227	64	210	3.291	1.718	0.00360298	0.0246591	0.2279	0.1179	up
OsTN2g002370	204	83	121	57	35	20	141	41	0.29	-1.786	5.1224186496766e-06	0.000117439	0.089	0.1289	down
OsTN2g002377	7	15	0	0	0	0	9	0	0.014	-6.145	0.000421016	0.00433843	0.7833	0.5651	down
OsTN2g002378	30	66	11	4	1	8	43	5	0.119	-3.065	0.000171174	0.00206607	0.3329	0.1825	down
OsTN2g002381	60	36	84	16	21	16	66	22	0.33	-1.601	0.00658154	0.03948	0.2064	0.1916	down
OsTN2g002382	0	0	0	0	0	11	0	5	40.192	5.329	0.00750288	0.0436765	1.3749	0.3231	up
OsTN2g002383	224	182	227	18	21	48	234	37	0.155	-2.686	5.56824689951499e-09	3.18290598377398e-07	0.1212	0.1186	down
OsTN2g002384	32	3	22	1	0	3	19	2	0.087	-3.521	0.000524402	0.00517737	0.4273	0.4134	down
OsTN2g002385	236	117	254	54	21	22	217	34	0.157	-2.667	3.21777562888864e-08	1.43624546758762e-06	0.1349	0.1171	down
OsTN2g002410	178	132	113	6	6	10	154	9	0.057	-4.135	6.75328354102094e-14	1.21370240724094e-11	0.1364	0.1488	down
OsTN2g002411	41	11	24	0	0	6	25	3	0.102	-3.296	0.000767199	0.00707699	0.4437	0.3153	down
OsTN2g002412	1	2	7	0	0	0	4	0	0.032	-4.981	0.00213289	0.0161486	0.472	0.5305	down
OsTN2g002413	20	9	4	0	1	1	11	1	0.082	-3.615	0.00168075	0.0133748	0.4715	0.5194	down
OsTN2g002440	8	2	5	309	413	23	5	301	57.424	5.844	1.28574503198916e-06	3.63073167688337e-05	0.6615	0.1174	up
OsTN2g002441	3	15	6	31	53	22	10	45	4.56	2.189	0.00251493	0.0185188	0.2904	0.2085	up
OsTN2g002442	1	0	2	102	43	8	1	51	42.585	5.412	6.80687596837794e-06	0.000148799	0.585	0.2062	up
OsTN2g002454	59	50	38	22	13	20	54	21	0.389	-1.361	0.00879578	0.0492169	0.1531	0.1997	down
OsTN2g002456	95	14	39	301	90	101	48	165	3.421	1.774	8.47645589013938e-06	0.000175719	0.0964	0.1201	up
OsTN2g002458	42	21	2	0	0	2	22	1	0.042	-4.59	0.000101922	0.00135293	0.5188	0.3576	down
OsTN2g002466	100	119	83	558	652	253	115	591	5.149	2.364	6.44929650474524e-06	0.000142321	0.1745	0.1579	up
OsTN2g002468	49	13	29	6	6	9	31	8	0.27	-1.89	0.0016789	0.0133651	0.1736	0.2452	down
OsTN2g002470	226	30	397	80	56	38	230	66	0.286	-1.808	0.00750653	0.0436799	0.3006	0.1164	down
OsTN2g002477	8	2	9	2	62	35	7	49	7.177	2.843	0.00668488	0.0399342	0.635	0.2013	up
OsTN2g002498	5	4	0	37	19	38	3	36	10.826	3.436	1.9353363679305e-07	7.01584245379525e-06	0.1664	0.2189	up
OsTN2g002527	127	127	151	392	124	334	153	310	2.044	1.031	0.00555606	0.0347881	0.0923	0.1203	up
OsTN2g002532	1	2	6	31	63	103	4	87	24.722	4.628	4.78176396852275e-09	2.77067946667929e-07	0.268	0.1811	up
OsTN2g002545	15	0	14	1	0	0	9	0	0.046	-4.432	0.00339843	0.0236142	0.8727	1.1564	down
OsTN2g002546	197	162	153	1359	200	327	189	578	3.08	1.623	0.00014281	0.00177433	0.1215	0.167	up
OsTN2g002565	40	15	37	989	468	293	32	615	18.943	4.244	2.13191936014945e-14	4.18626054358236e-12	0.1621	0.1567	up
OsTN2g002566	21	8	12	372	256	132	14	283	19.671	4.298	1.00235007435604e-15	2.69073899074285e-13	0.1399	0.1151	up
OsTN2g002576	4	28	4	56	18	60	16	50	3.319	1.731	0.00633876	0.0384184	0.2304	0.1995	up
OsTN2g002589	76	76	68	56	28	23	83	38	0.471	-1.087	0.00628068	0.0381536	0.0909	0.1669	down
OsTN2g002590	524	263	376	914	640	650	411	850	2.066	1.047	0.00834764	0.0473971	0.1092	0.1851	up
OsTN2g002600	338	199	343	873	569	445	318	709	2.231	1.158	0.00343156	0.0238132	0.1075	0.171	up
OsTN2g002615	544	258	507	331	92	119	465	181	0.392	-1.351	0.000423205	0.00435464	0.0984	0.1527	down
OsTN2g002622	70	34	43	40	10	14	52	21	0.424	-1.239	0.00307562	0.0217997	0.0905	0.1984	down
OsTN2g002629	260	258	547	66	68	13	404	57	0.141	-2.823	8.87430572017386e-07	2.63581794688693e-05	0.199	0.1163	down
OsTN2g002630	65	37	76	20	10	8	65	14	0.214	-2.225	3.53090054129714e-05	0.000572038	0.1532	0.2037	down
OsTN2g002634	296	255	125	52	22	18	248	32	0.131	-2.938	0.00402033	0.0269979	0.6374	0.1214	down
OsTN2g002638	0	1	0	0	6	42	0	22	42.836	5.421	0.00116346	0.00990112	1.1085	0.1151	up
OsTN2g002645	57	82	21	235	311	109	62	269	4.365	2.126	0.000109656	0.00143106	0.1912	0.1187	up
OsTN2g002646	15	10	8	127	53	12	12	63	5.383	2.428	7.23884934323341e-06	0.000156299	0.1516	0.1841	up
OsTN2g002647	23	24	35	8	2	5	31	5	0.177	-2.502	0.00016027	0.00195787	0.201	0.2106	down
OsTN2g002648	35	68	4	224	60	108	43	134	3.176	1.667	0.00646714	0.0389563	0.241	0.1307	up
OsTN2g002651	325	112	199	36	20	16	218	27	0.121	-3.05	2.76241941064028e-15	6.73363545304004e-13	0.0765	0.1178	down
OsTN2g002667	137	136	121	51	47	25	148	48	0.325	-1.621	0.00358634	0.0245975	0.1981	0.1317	down
OsTN2g002682	19	11	11	88	32	25	14	49	3.376	1.755	0.00317782	0.0223745	0.2015	0.1868	up
OsTN2g002684	33	4	24	99	43	32	20	61	2.945	1.558	0.00138979	0.0114504	0.1342	0.1909	up
OsTN2g002688	29	25	65	3	4	4	45	4	0.1	-3.318	6.45169576498725e-05	0.000926972	0.3332	0.2058	down
OsTN2g002692	73	70	44	577	332	311	69	453	6.537	2.709	1.84783447809519e-07	6.73316594105923e-06	0.1647	0.1469	up
OsTN2g002695	29243	15998	42108	79217	146521	69804	31777	127557	4.014	2.005	1.03967933108008e-06	3.0244827948169e-05	0.1128	0.0634	up
OsTN2g002696	6843	1990	6220	25571	22898	11065	5201	23156	4.451	2.154	2.37380444408899e-06	6.10937752982952e-05	0.1379	0.1034	up
OsTN2g002697	7844	8274	13572	52390	87880	39921	11268	76787	6.815	2.769	9.81771479824001e-10	6.64245367246593e-08	0.1295	0.0861	up
OsTN2g002708	13	5	3	35	21	6	7	22	3.03	1.599	0.0075389	0.043778	0.1648	0.2145	up
OsTN2g002712	28	53	23	1036	345	960	41	864	21.111	4.4	3.94523303405584e-10	2.97745754281929e-08	0.2623	0.1648	up
OsTN2g002713	121	116	133	26	27	38	139	38	0.268	-1.9	0.000150686	0.00185575	0.1521	0.1518	down
OsTN2g002714	1	0	0	4	0	26	0	13	28.014	4.808	0.00153498	0.0124769	0.8826	0.3035	up
OsTN2g002717	0	0	0	3	1	18	0	10	75.514	6.239	0.000682028	0.00643406	0.9874	0.7229	up
OsTN2g002740	4	2	4	73	32	13	4	40	10.939	3.451	1.21706713430101e-06	3.46447553249953e-05	0.2175	0.207	up
OsTN2g002760	135	69	96	68	26	37	106	47	0.442	-1.178	0.00130584	0.0108642	0.0781	0.1508	down
OsTN2g002785	57	33	28	304	97	79	42	160	3.823	1.935	0.000630784	0.00603657	0.2023	0.117	up
OsTN2g002792	2	0	0	144	70	31	1	85	105.809	6.725	5.73401901910455e-13	8.38629940263104e-11	0.2604	0.1995	up
OsTN2g002796	38	3	31	179	60	114	24	126	5.192	2.376	6.61660097048727e-06	0.000145408	0.1626	0.148	up
OsTN2g002816	32	16	37	127	101	79	30	119	3.873	1.953	4.45830462167721e-06	0.000103756	0.1031	0.1515	up
OsTN2g002819	13	2	3	57	21	12	6	30	5.021	2.328	0.000613825	0.005917	0.2305	0.1944	up
OsTN2g002822	19	21	2	87	54	66	15	79	5.067	2.341	0.000114708	0.0014849	0.2087	0.1155	up
OsTN2g002824	23	2	25	28	91	120	17	109	6.306	2.657	0.000311223	0.00336857	0.3218	0.1211	up
OsTN2g002828	5	1	4	8	7	522	3	243	68.383	6.096	5.54243467064043e-05	0.000817943	1.0219	0.1452	up
OsTN2g002829	2	0	4	37	16	9	2	21	9.558	3.257	6.37780209269791e-06	0.000141037	0.1761	0.2389	up
OsTN2g002831	49	56	24	25	15	4	49	16	0.326	-1.618	0.00398122	0.0267946	0.1756	0.2045	down
OsTN2g002845	7	5	2	34	45	9	5	36	6.983	2.804	0.00270769	0.0196583	0.4743	0.2358	up
OsTN2g002855	891	297	970	60	88	116	757	113	0.149	-2.75	1.49203167503179e-06	4.15788643001304e-05	0.202	0.1632	down
OsTN2g002874	0	0	2	16	17	12	1	18	21.009	4.393	3.49717548237822e-05	0.000568311	0.3759	0.209	up
OsTN2g002878	9	4	5	21	18	20	6	23	3.599	1.848	0.00249322	0.0183717	0.1654	0.2616	up
OsTN2g002907	66	17	44	2	4	7	43	6	0.124	-3.013	3.07918612785454e-06	7.61075760063068e-05	0.1822	0.2053	down
OsTN2g002908	187	48	92	0	0	2	109	1	0.008	-6.966	2.79808650092028e-19	1.52151334423119e-16	0.1523	0.1675	down
OsTN2g002909	0	0	0	0	0	8	0	4	29.035	4.86	0.00827573	0.0471277	0.9695	0.202	up
OsTN2g002931	77	119	90	24	4	16	111	15	0.14	-2.837	8.51835485692095e-08	3.4084670085042e-06	0.1492	0.1952	down
OsTN2g002934	525	356	241	2807	1152	2222	402	2285	5.687	2.508	1.02487488840035e-09	6.8998481772401e-08	0.1076	0.1829	up
OsTN2g002937	1	0	0	6	0	48	0	23	51.915	5.698	0.00167224	0.013322	1.3501	0.2214	up
OsTN2g002940	0	3	0	10	20	21	1	23	17.034	4.09	9.67085907122285e-05	0.00129642	0.4242	0.205	up
OsTN2g002955	224	181	88	1019	474	1531	179	1188	6.63	2.729	1.85971772539025e-08	8.84283269111008e-07	0.1466	0.1719	up
OsTN2g002963	3	0	6	16	9	18	3	17	5.025	2.329	0.00669389	0.0399431	0.3477	0.462	up
OsTN2g002964	13	22	1	63	37	58	14	61	4.37	2.128	0.000763481	0.00705189	0.2257	0.2014	up
OsTN2g002965	167	239	190	797	1304	748	230	1215	5.272	2.398	4.05497280295302e-06	9.58682366022573e-05	0.1739	0.189	up
OsTN2g002968	17	0	29	126	46	26	16	66	4.107	2.038	0.00500456	0.0319577	0.3213	0.1988	up
OsTN2g002969	3	0	2	45	20	6	1	24	13.183	3.721	4.78284127923316e-05	0.000725534	0.3451	0.2175	up
OsTN2g002972	226	119	129	955	295	187	167	468	2.808	1.489	0.000214504	0.00247228	0.108	0.1571	up
OsTN2g002989	0	0	0	0	4	11	0	7	55.761	5.801	0.000658858	0.00625724	0.7188	0.1983	up
OsTN2g003005	87	17	12	28	3	2	36	9	0.272	-1.877	0.00838093	0.0475735	0.2944	0.2124	down
OsTN2g003007	39	25	41	133	62	52	38	88	2.312	1.209	0.00093692	0.00829387	0.0743	0.1657	up
OsTN2g003011	3	1	2	14	26	9	2	21	9.28	3.214	0.000225042	0.00257692	0.3149	0.3272	up
OsTN2g003012	5	2	2	5	26	7	3	18	5.376	2.427	0.00496459	0.0317695	0.3477	0.39	up
OsTN2g003023	18	16	6	130	63	27	15	76	5.248	2.392	4.24118955298306e-06	9.96045480067682e-05	0.1433	0.1799	up
OsTN2g003024	10	5	7	67	14	27	8	36	4.576	2.194	0.000145871	0.00180483	0.1593	0.2047	up
OsTN2g003043	21	16	19	41	47	216	20	132	6.425	2.684	0.00478875	0.030943	0.5553	0.1151	up
OsTN2g003048	0	0	4	689	298	161	2	394	248.969	7.96	1.86764287446742e-29	4.95088780485382e-26	0.1445	0.1152	up
OsTN2g003082	84	43	19	628	530	55	50	453	9.001	3.17	7.06089857182345e-06	0.000153109	0.2967	0.1196	up
OsTN2g003091	9	12	5	48	58	25	10	53	5.373	2.426	6.83418093542163e-05	0.000972291	0.1914	0.201	up
OsTN2g003102	6	0	8	17	13	85	5	49	10.014	3.324	0.00399639	0.0268765	0.7431	0.1863	up
OsTN2g003118	2	1	4	26	15	1	3	15	5.539	2.47	0.00240925	0.0178397	0.2689	0.2075	up
OsTN2g003122	1	0	0	30	19	2	0	18	38.739	5.276	2.93224397031677e-06	7.29860303738355e-05	0.3507	0.2408	up
OsTN2g003124	29	36	47	14	4	7	43	9	0.208	-2.265	0.000385861	0.00403101	0.2116	0.2051	down
OsTN2g003127	1747	2208	1160	6170	5613	3353	1953	5944	3.043	1.606	0.000355184	0.00376445	0.1384	0.1492	up
OsTN2g003128	669	320	297	2763	854	543	446	1355	3.04	1.604	0.000113614	0.00147636	0.1172	0.188	up
OsTN2g003131	59	26	152	7	7	7	87	9	0.096	-3.387	1.91118422138247e-06	5.09817406073686e-05	0.2582	0.202	down
OsTN2g003143	37	68	31	224	267	162	54	267	5.002	2.322	1.02659446618673e-05	0.00020636	0.1712	0.115	up
OsTN2g003145	62	23	31	185	57	62	39	102	2.574	1.364	0.000918289	0.00816185	0.1011	0.1296	up
OsTN2g003159	0	0	0	1	6	6	0	6	46.613	5.543	0.000313907	0.00339126	0.4099	0.2371	up
OsTN2g003163	95	39	79	42	30	15	75	32	0.433	-1.208	0.00800235	0.0458514	0.1221	0.1958	down
OsTN2g003164	27	1	59	447	504	36	31	388	12.515	3.646	2.84326791169485e-05	0.000479691	0.4336	0.1167	up
OsTN2g003167	12	2	5	62	16	17	6	31	4.803	2.264	5.19126969165002e-05	0.000777481	0.1366	0.2077	up
OsTN2g003173	43	30	31	242	107	65	38	144	3.821	1.934	3.31807186561191e-06	8.06953555665503e-05	0.1012	0.116	up
OsTN2g003177	25	3	25	338	171	87	18	210	11.473	3.52	3.79638040650654e-10	2.90649239280809e-08	0.1695	0.1308	up
OsTN2g003182	10	18	20	2	1	1	19	1	0.084	-3.576	0.000166138	0.00201677	0.3448	0.4431	down
OsTN2g003194	42	21	30	151	158	47	33	140	4.231	2.081	9.47512006613591e-06	0.00019247	0.1306	0.1168	up
OsTN2g003218	77	31	53	142	121	52	56	121	2.141	1.099	0.00685365	0.0406674	0.1025	0.1462	up
OsTN2g003221	108	37	221	6	6	34	133	20	0.149	-2.744	0.000436703	0.00445986	0.3612	0.152	down
OsTN2g003233	43	23	12	15	2	2	27	6	0.23	-2.119	0.000740258	0.0068797	0.1856	0.2116	down
OsTN2g003240	12	80	32	691	2231	869	53	1731	32.889	5.04	6.89137297399514e-10	4.92071874274461e-08	0.3368	0.1892	up
OsTN2g003245	691	733	493	3822	1036	935	721	1881	2.614	1.386	0.000727781	0.0067842	0.1159	0.1821	up
OsTN2g003247	0	0	0	5	16	4	0	11	90.363	6.498	0.000255614	0.00286232	0.8726	0.4339	up
OsTN2g003254	201	138	134	30	34	52	171	49	0.28	-1.837	3.5536468323187e-05	0.000575284	0.1198	0.1315	down
OsTN2g003258	7	4	1	0	44	33	4	38	8.831	3.143	0.00832009	0.0472914	0.7924	0.2427	up
OsTN2g003260	0	0	0	0	0	28	0	13	102.007	6.673	0.00149824	0.0122163	1.5194	0.2038	up
OsTN2g003269	8	8	0	18	4	35	6	22	3.769	1.914	0.00744952	0.0434852	0.2513	0.2107	up
OsTN2g003272	59	35	62	75	172	138	57	171	3.011	1.59	0.00600183	0.036893	0.2185	0.1194	up
OsTN2g003274	309	177	159	718	509	250	228	552	2.42	1.275	0.00352405	0.0242803	0.1302	0.1649	up
OsTN2g003284	11	28	10	83	35	34	20	53	2.782	1.476	0.00477744	0.0308794	0.1534	0.2003	up
OsTN2g003286	308	166	193	983	311	316	236	542	2.299	1.201	0.000840544	0.0076112	0.0875	0.1672	up
OsTN2g003296	56	48	51	83	91	114	57	119	2.07	1.049	0.00815743	0.0465764	0.0966	0.1489	up
OsTN2g003301	8	2	16	52	32	27	9	41	4.369	2.127	0.000243664	0.00275447	0.1689	0.2022	up
OsTN2g003313	0	0	0	0	2	8	0	5	35.984	5.169	0.00125009	0.0104785	0.4668	0.4042	up
OsTN2g003323	24	27	20	141	124	56	27	124	4.652	2.218	2.01040113975628e-06	5.30280808094669e-05	0.1235	0.1302	up
OsTN2g003335	558	278	147	1717	765	598	338	1083	3.207	1.681	5.58109752666585e-05	0.000821933	0.1171	0.1891	up
OsTN2g003342	62	35	48	172	48	98	52	111	2.146	1.102	0.00359579	0.0246305	0.0862	0.1309	up
OsTN2g003353	283	165	131	116	74	73	204	100	0.485	-1.045	0.00104939	0.00912064	0.0634	0.1157	down
OsTN2g003356	1	2	0	33	35	7	1	30	23.937	4.581	1.42012129751589e-07	5.32093857887269e-06	0.2423	0.2188	up
OsTN2g003368	0	0	0	0	4	4	0	4	30.504	4.931	0.00658466	0.03948	0.8965	0.4332	up
OsTN2g003369	49	12	20	4	0	0	27	1	0.052	-4.257	5.50905418564978e-06	0.000124686	0.3352	0.2323	down
OsTN2g003380	478	377	321	2254	1003	935	430	1490	3.466	1.793	5.32287979089661e-06	0.00012164	0.1039	0.1892	up
OsTN2g003385	11	12	8	50	28	60	12	54	4.643	2.215	3.67846817236272e-05	0.000592326	0.1452	0.188	up
OsTN2g003387	74	69	11	9	4	16	56	11	0.202	-2.304	0.000361927	0.0038205	0.2276	0.2043	down
OsTN2g003411	1	1	0	3	2	21	1	11	13.343	3.738	0.00256657	0.0188141	0.5978	0.2055	up
OsTN2g003424	182	111	143	90	33	33	156	54	0.348	-1.523	1.95708203038867e-06	5.18797982730656e-05	0.0584	0.125	down
OsTN2g003435	459	60	145	1511	733	182	209	829	3.962	1.986	0.000644454	0.00613969	0.2247	0.1848	up
OsTN2g003439	97	45	39	4	7	11	63	10	0.147	-2.765	1.81013417888574e-05	0.000330927	0.2125	0.1933	down
OsTN2g003448	121	124	67	515	181	146	116	284	2.455	1.295	0.000538475	0.00528922	0.0915	0.1266	up
OsTN2g003450	1329	1228	339	3818	1704	1358	1063	2423	2.28	1.189	0.00691369	0.0409664	0.1351	0.1711	up
OsTN2g003453	6	3	1	57	22	16	3	33	9.073	3.182	9.19383850043136e-06	0.000187807	0.2218	0.2217	up
OsTN2g003526	2	0	2	23	37	14	1	31	20.438	4.353	1.0070224090867e-05	0.00020281	0.3898	0.2176	up
OsTN2g003532	184	572	83	52	15	32	349	35	0.101	-3.314	6.96145913362029e-05	0.000988164	0.4077	0.115	down
OsTN2g003533	41	21	34	150	44	43	34	78	2.317	1.212	0.00206986	0.0157954	0.0877	0.1752	up
OsTN2g003535	0	2	0	10	23	10	1	19	21.02	4.394	3.95553788419997e-05	0.000628824	0.3824	0.2862	up
OsTN2g003542	0	0	0	16	12	4	0	12	95.696	6.58	3.27308243899174e-06	8.00602759904242e-05	0.3568	0.2445	up
OsTN2g003571	1674	1161	1144	541	518	286	1439	531	0.369	-1.44	0.000707057	0.00662011	0.1238	0.1884	down
OsTN2g003572	19	15	15	80	36	33	18	53	2.961	1.566	0.00383004	0.025917	0.1662	0.1989	up
OsTN2g003577	12	2	0	298	138	31	4	158	34.945	5.127	2.26200784622047e-06	5.85719174539651e-05	0.5596	0.1612	up
OsTN2g003583	61	65	19	290	127	245	54	247	4.595	2.2	4.5590776644583e-08	1.97642001436908e-06	0.0968	0.118	up
OsTN2g003585	11	10	5	55	37	29	10	46	4.772	2.255	1.13835781923572e-05	0.000225618	0.1212	0.2003	up
OsTN2g003587	588	155	449	134	53	166	406	135	0.332	-1.59	0.000294322	0.00323236	0.1275	0.1181	down
OsTN2g003592	5	2	6	133	141	0	5	106	22.211	4.473	3.43565926581922e-05	0.000560893	0.583	0.2002	up
OsTN2g003621	2	0	8	39	13	52	4	40	10.568	3.402	1.50548050476542e-06	4.1861494532776e-05	0.2138	0.1538	up
OsTN2g003630	19	16	8	36	40	45	15	50	3.152	1.656	0.00183868	0.014388	0.1528	0.2037	up
OsTN2g003636	214	111	169	0	0	2	175	1	0.005	-7.665	1.80672764182752e-31	9.57881827505907e-28	0.0943	0.1303	down
OsTN2g003645	12	8	7	0	0	3	10	1	0.135	-2.888	0.00629571	0.038234	0.4168	0.9077	down
OsTN2g003646	16	14	9	76	58	59	15	75	5.244	2.391	8.18656600529793e-06	0.000171724	0.153	0.1469	up
OsTN2g003656	4	0	5	18	12	16	3	18	5.477	2.453	0.00438114	0.0289117	0.3506	0.2172	up
OsTN2g003658	70	55	80	194	193	99	76	193	2.538	1.344	0.00134438	0.0111281	0.1126	0.1189	up
OsTN2g003723	292	159	105	100	30	16	194	47	0.247	-2.019	2.0209060831007e-06	5.32389506885921e-05	0.1096	0.1231	down
OsTN2g003724	10	11	6	25	49	55	10	57	5.546	2.471	0.00179485	0.0141028	0.3589	0.1769	up
OsTN2g003832	85	100	138	24	29	28	124	34	0.269	-1.895	0.000235225	0.00267189	0.1595	0.1838	down
OsTN2g003835	137	89	108	20	14	19	120	21	0.169	-2.563	1.78243715066953e-08	8.54909302851026e-07	0.109	0.1827	down
OsTN2g003836	36	68	37	1	4	11	56	7	0.126	-2.987	0.000132287	0.00166691	0.3159	0.204	down
OsTN2g003837	278	293	269	15	28	35	317	34	0.106	-3.235	1.14928268745047e-07	4.40738480158448e-06	0.213	0.1154	down
OsTN2g003855	0	0	0	0	0	18	0	8	65.599	6.036	0.00265583	0.0193518	1.364	0.569	up
OsTN2g003857	39	39	32	127	120	57	41	119	2.897	1.534	0.00060817	0.0058812	0.1214	0.1363	up
OsTN2g003858	29	7	18	136	41	31	18	68	3.704	1.889	0.000119606	0.00153541	0.1337	0.1969	up
OsTN2g003863	0	0	0	1	6	10	0	8	61.758	5.949	0.000165827	0.00201415	0.5199	0.3775	up
OsTN2g003868	70	51	69	46	12	15	70	24	0.36	-1.474	0.000150072	0.00184926	0.0783	0.1844	down
OsTN2g003892	0	3	2	8	12	8	2	12	5.62	2.491	0.00650509	0.0391468	0.3253	0.4303	up
OsTN2g003901	179	91	125	464	267	146	139	317	2.27	1.183	0.000624094	0.0059969	0.0785	0.1332	up
OsTN2g003937	63	41	38	276	79	47	51	129	2.551	1.351	0.000455884	0.00461918	0.09	0.1282	up
OsTN2g003949	13	13	12	57	24	30	14	40	2.839	1.506	0.00183925	0.014388	0.1147	0.2026	up
OsTN2g003955	211	182	83	103	39	29	174	58	0.339	-1.562	3.052010695652e-05	0.000508836	0.0854	0.1287	down
OsTN2g003971	2	0	10	0	0	0	5	0	0.027	-5.188	0.00377273	0.0255702	0.8491	0.9887	down
OsTN2g003984	129	8	49	1324	379	86	57	554	9.536	3.253	6.3860479653048e-05	0.000918859	0.3958	0.1455	up
OsTN2g003985	4	0	2	28	14	7	2	17	7.996	2.999	0.000128657	0.00163183	0.2256	0.2625	up
OsTN2g004003	4	7	10	19	26	36	8	35	4.201	2.071	0.00283992	0.0203949	0.253	0.2359	up
OsTN2g004007	5	6	0	50	14	10	4	24	5.921	2.566	0.000189764	0.00225074	0.2013	0.2074	up
OsTN2g004011	0	0	0	7	10	8	0	11	83.236	6.379	2.05225626824543e-05	0.000367276	0.441	0.1779	up
OsTN2g004024	0	0	0	166	48	55	0	90	724.004	9.5	1.97732721290235e-22	2.20700937915895e-19	0.1365	0.1949	up
OsTN2g004025	6	2	9	85	98	75	6	106	16.937	4.082	4.73733913922239e-12	5.63340552016809e-10	0.153	0.1925	up
OsTN2g004028	0	1	0	0	4	112	0	53	102.146	6.674	0.000118192	0.00152001	1.1206	0.1994	up
OsTN2g004029	0	0	0	0	1	709	0	323	2581.01	11.334	1.58193815226113e-05	0.000295059	1.9151	0.1241	up
OsTN2g004030	3	4	21	19	130	31	11	87	7.942	2.989	0.000823546	0.00747323	0.4587	0.115	up
OsTN2g004031	0	0	0	0	2	7	0	4	32.608	5.027	0.00228726	0.0171218	0.5349	0.32	up
OsTN2g004033	134	105	93	847	172	240	122	402	3.324	1.733	1.20745249527256e-05	0.00023695	0.1018	0.1418	up
OsTN2g004034	0	7	5	27	19	5	5	19	3.815	1.932	0.00852134	0.0481771	0.2465	0.2622	up
OsTN2g004053	52	64	14	3	3	3	49	4	0.073	-3.781	1.56872169019568e-06	4.32050401090647e-05	0.2718	0.2158	down
OsTN2g004085	27	54	6	387	99	1912	35	1013	29.256	4.871	4.4941641690289e-08	1.95703777274324e-06	0.4053	0.1313	up
OsTN2g004093	27	16	13	99	102	95	20	120	5.994	2.584	1.59711222963905e-07	5.91098761849132e-06	0.1331	0.1718	up
OsTN2g004098	1	0	0	6	6	204	0	97	211.442	7.724	2.21139201916518e-07	7.89511625428215e-06	0.725	0.2099	up
OsTN2g004106	81	51	34	13	2	7	59	7	0.132	-2.927	3.6306914558431e-07	1.22022303809928e-05	0.1563	0.2036	down
OsTN2g004107	118	147	87	17	18	23	135	24	0.175	-2.517	3.79897826910206e-07	1.26873908902122e-05	0.1361	0.1439	down
OsTN2g004113	24	20	23	125	45	41	25	72	2.951	1.561	0.000231704	0.0026418	0.0976	0.1863	up
OsTN2g004116	0	0	1	22	0	6	0	8	16.943	4.083	0.00596707	0.0367753	0.8512	0.9575	up
OsTN2g004120	57	21	58	19	3	8	48	10	0.213	-2.228	0.000263886	0.00294426	0.1986	0.2031	down
OsTN2g004122	503	165	276	97	65	181	320	139	0.433	-1.208	0.00399333	0.0268675	0.1177	0.124	down
OsTN2g004136	2	5	0	335	177	77	3	208	76.738	6.262	9.2230994788595e-22	8.89064866582607e-19	0.145	0.1178	up
OsTN2g004137	35	16	26	116	43	50	27	73	2.69	1.427	0.000364904	0.00384427	0.0869	0.1691	up
OsTN2g004154	91	90	62	41	25	40	91	41	0.45	-1.151	0.00371481	0.0252787	0.0908	0.157	down
OsTN2g004155	80	35	85	47	4	17	71	21	0.312	-1.682	0.000205499	0.00238404	0.1141	0.1874	down
OsTN2g004171	0	0	1	0	0	28	0	13	25.628	4.68	0.00266601	0.0194022	0.9553	0.1594	up
OsTN3g000015	31	6	20	68	68	34	19	67	3.423	1.775	0.000213634	0.00246492	0.1263	0.1822	up
OsTN3g000019	55	58	49	33	5	9	61	15	0.256	-1.965	4.85310031356086e-05	0.000734616	0.1226	0.2011	down
OsTN3g000020	75	42	36	167	61	79	54	108	2.002	1.002	0.00305772	0.0217043	0.0663	0.1379	up
OsTN3g000025	2	1	0	44	130	63	1	108	91.175	6.511	9.62812015348864e-11	8.40261498333472e-09	0.3513	0.1421	up
OsTN3g000044	58	54	33	3	0	20	54	10	0.181	-2.469	0.00317063	0.0223313	0.4015	0.1944	down
OsTN3g000054	142	47	76	299	137	117	90	196	2.172	1.119	0.0018301	0.0143478	0.0825	0.1159	up
OsTN3g000056	3	3	2	20	24	11	3	22	7.276	2.863	0.000108355	0.00142106	0.2156	0.2228	up
OsTN3g000066	76	31	32	198	93	85	47	135	2.812	1.492	7.1643194246733e-05	0.00101154	0.0839	0.1244	up
OsTN3g000081	13	13	4	224	139	44	11	146	13.258	3.729	8.96390991853909e-12	1.00580760657385e-09	0.1452	0.1388	up
OsTN3g000089	0	6	4	14	88	27	4	62	14.54	3.862	0.000132915	0.00167283	0.5127	0.1537	up
OsTN3g000097	53	23	17	17	3	2	32	7	0.223	-2.164	0.00277814	0.0200531	0.2814	0.2101	down
OsTN3g000103	0	0	0	20	30	16	0	28	220.837	7.787	8.18127550874729e-08	3.31107461286267e-06	0.4493	0.2048	up
OsTN3g000106	31	3	25	41	113	124	19	125	6.28	2.651	0.00020289	0.00235893	0.3038	0.123	up
OsTN3g000114	116	44	86	338	106	84	86	174	2.046	1.033	0.00421879	0.0280904	0.0832	0.1156	up
OsTN3g000120	225	75	129	79	45	51	146	66	0.446	-1.166	0.00110414	0.00949537	0.0778	0.1301	down
OsTN3g000123	0	0	0	9	2	5	0	5	45.384	5.504	0.000918069	0.00816185	0.6386	1.1758	up
OsTN3g000125	20	16	19	3	3	3	20	4	0.174	-2.525	9.6761561788333e-05	0.00129642	0.1429	0.2925	down
OsTN3g000126	11	28	48	203	71	54	35	110	3.212	1.684	0.0043016	0.0285432	0.2191	0.167	up
OsTN3g000127	7	4	13	39	64	28	9	56	6.197	2.632	6.42984040696448e-05	0.000924458	0.2272	0.2022	up
OsTN3g000130	166	25	106	814	278	107	98	389	3.958	1.985	0.000129267	0.00163565	0.175	0.1213	up
OsTN3g000133	33	57	25	127	290	88	45	223	4.94	2.305	5.65775121651278e-05	0.000831489	0.2024	0.118	up
OsTN3g000138	121	134	169	187	452	307	161	421	2.614	1.386	0.00569364	0.0354403	0.17	0.1343	up
OsTN3g000166	34	7	15	74	53	65	19	75	3.943	1.979	3.51223733987205e-05	0.000569885	0.1252	0.1857	up
OsTN3g000168	78	26	49	15	11	4	52	11	0.212	-2.24	8.90515739413436e-05	0.00120981	0.1688	0.2116	down
OsTN3g000173	7	4	14	85	133	65	9	120	12.844	3.683	1.36442939745842e-09	8.98616591052814e-08	0.1813	0.1369	up
OsTN3g000174	14	11	32	157	501	233	21	406	18.977	4.246	2.63415956820993e-11	2.71177776519554e-09	0.2111	0.125	up
OsTN3g000180	0	0	0	3	11	5	0	9	67.313	6.073	3.74147823811112e-05	0.000599739	0.3778	0.2624	up
OsTN3g000191	145	88	100	430	204	114	119	261	2.196	1.135	0.00622264	0.0378988	0.1146	0.1201	up
OsTN3g000203	210	113	202	467	312	333	188	427	2.263	1.179	0.00221945	0.0167028	0.1001	0.1576	up
OsTN3g000211	20	17	8	42	85	37	16	71	4.299	2.104	0.000297935	0.00325854	0.1916	0.15	up
OsTN3g000213	120	77	110	614	102	208	111	295	2.663	1.413	0.000253886	0.00284928	0.0975	0.1243	up
OsTN3g000222	0	2	27	134	260	108	12	218	18.989	4.247	7.00651835422184e-07	2.14721437482634e-05	0.3809	0.1213	up
OsTN3g000229	180	62	148	752	336	153	135	425	3.14	1.651	6.33836831110312e-05	0.000913164	0.1121	0.1358	up
OsTN3g000230	620	489	725	2111	2718	1152	678	2454	3.619	1.856	3.17425849122981e-05	0.00052509	0.1335	0.1858	up
OsTN3g000231	10	8	1	185	120	48	7	129	18.71	4.226	2.70131321357455e-15	6.66124992096227e-13	0.1216	0.1464	up
OsTN3g000242	189	121	79	42	11	5	138	18	0.136	-2.878	3.42332309551276e-07	1.15971905569551e-05	0.1786	0.1802	down
OsTN3g000243	939	1511	760	121	113	75	1254	122	0.097	-3.361	4.65176786242385e-08	2.00508213533379e-06	0.2236	0.1704	down
OsTN3g000255	79	27	20	183	81	70	42	118	2.794	1.482	0.000700752	0.00657269	0.1172	0.1504	up
OsTN3g000256	260	221	92	1636	655	371	209	903	4.323	2.112	4.18276712764504e-05	0.000655617	0.1739	0.1838	up
OsTN3g000262	166	44	163	498	168	124	129	264	2.042	1.03	0.00716536	0.0422334	0.0978	0.1195	up
OsTN3g000266	0	0	0	1	0	21	0	10	78.635	6.297	0.00353837	0.0243552	1.705	1.784	up
OsTN3g000268	77	103	42	3	2	24	85	13	0.146	-2.774	0.000196572	0.00231934	0.3124	0.1887	down
OsTN3g000272	63	12	73	3491	1449	586	51	1861	36.229	5.179	3.2886083841757e-12	4.00813321857552e-10	0.2753	0.1865	up
OsTN3g000277	32	18	35	323	84	20	31	130	4.27	2.094	5.9561247620655e-05	0.000866929	0.1642	0.1313	up
OsTN3g000284	25	19	14	41	24	107	21	71	3.35	1.744	0.00288734	0.0206681	0.2042	0.1607	up
OsTN3g000289	0	1	3	4	27	4	2	17	10.01	3.323	0.00263799	0.0192445	0.5409	0.2516	up
OsTN3g000295	12	15	14	0	0	2	16	1	0.057	-4.131	2.04501442666032e-05	0.000366599	0.2651	0.4139	down
OsTN3g000300	202	56	132	490	212	148	132	296	2.228	1.156	0.00164681	0.0131639	0.0893	0.1281	up
OsTN3g000301	2413	1977	2030	674	785	804	2365	939	0.396	-1.335	0.00197208	0.0151804	0.1287	0.1788	down
OsTN3g000302	364	117	178	110	81	73	222	102	0.454	-1.138	0.00123781	0.0104085	0.0794	0.1156	down
OsTN3g000357	189	62	92	69	21	25	116	39	0.34	-1.558	7.95337717113214e-05	0.00110286	0.0912	0.1361	down
OsTN3g000377	13	7	6	0	0	1	9	0	0.055	-4.186	0.00106878	0.00925885	0.4988	1.3544	down
OsTN3g000378	304	246	580	40	24	38	423	40	0.093	-3.432	3.1452279582828e-12	3.85634550051899e-10	0.1347	0.1155	down
OsTN3g000392	11	8	6	57	29	20	9	38	4.186	2.066	9.79904280270723e-05	0.00130862	0.1299	0.1997	up
OsTN3g000396	28	15	10	480	254	655	19	546	29.191	4.867	6.33790464997096e-20	3.95317482093924e-17	0.1357	0.1283	up
OsTN3g000403	37	31	33	63	101	68	37	99	2.632	1.396	0.00226456	0.0169818	0.1257	0.1682	up
OsTN3g000405	432	149	373	347	53	85	332	149	0.455	-1.137	0.00445718	0.0293096	0.1078	0.128	down
OsTN3g000409	70	92	50	18	0	9	82	8	0.111	-3.17	1.25450527006775e-06	3.55672369817204e-05	0.2222	0.2013	down
OsTN3g000423	4	11	2	48	14	18	7	27	4.116	2.041	0.00125493	0.0105149	0.1863	0.2221	up
OsTN3g000436	75	66	62	43	27	20	75	34	0.445	-1.167	0.00766416	0.0443476	0.111	0.1848	down
OsTN3g000441	25	7	14	107	34	15	15	50	3.21	1.683	0.00297324	0.0211802	0.1833	0.2014	up
OsTN3g000443	60	40	35	9	4	7	49	7	0.154	-2.701	2.22235772429285e-07	7.90764098306687e-06	0.1149	0.2025	down
OsTN3g000455	1645	1000	930	5363	1488	1277	1273	2642	2.076	1.054	0.00441049	0.0290657	0.0961	0.1714	up
OsTN3g000461	10	14	7	13	32	52	12	43	3.633	1.861	0.00731429	0.0428729	0.2745	0.2009	up
OsTN3g000464	17	2	0	25	16	18	6	23	3.669	1.875	0.00734514	0.0429943	0.2476	0.2132	up
OsTN3g000473	35	8	6	238	55	4	15	88	5.542	2.47	0.00161152	0.0129551	0.3719	0.1685	up
OsTN3g000474	29	17	11	9	2	6	20	6	0.306	-1.708	0.00335583	0.0233951	0.1363	0.2486	down
OsTN3g000481	8985	9479	19150	2812	4170	3501	14314	4451	0.311	-1.685	0.000304921	0.00331273	0.1486	0.1293	down
OsTN3g000490	108	58	72	47	13	20	84	27	0.329	-1.606	0.00014282	0.00177433	0.0996	0.1767	down
OsTN3g000495	28	26	19	201	77	47	27	110	4.095	2.034	1.55671242536917e-05	0.000291269	0.1276	0.166	up
OsTN3g000502	100	155	62	694	191	294	124	400	3.261	1.705	4.56023384697781e-05	0.000698764	0.1141	0.136	up
OsTN3g000503	33	71	32	345	157	237	54	272	5.062	2.34	1.10848804918936e-06	3.18532602427624e-05	0.1408	0.1151	up
OsTN3g000525	426	135	146	104	47	40	235	68	0.288	-1.795	5.39327701963987e-07	1.70709292172392e-05	0.078	0.1151	down
OsTN3g000537	0	2	0	2	9	13	1	11	11.996	3.585	0.00469693	0.0305077	0.6394	0.286	up
OsTN3g000554	808	1286	393	2923	2650	6667	971	5118	5.273	2.399	2.65700868559344e-05	0.000453681	0.2115	0.1674	up
OsTN3g000555	392	364	150	2098	738	1864	334	1735	5.198	2.378	8.09837976246553e-07	2.43596616420487e-05	0.1499	0.189	up
OsTN3g000556	0	0	15	12	40	76	6	59	9.846	3.3	0.00337025	0.0234799	0.7081	0.1898	up
OsTN3g000566	548	107	310	141	73	51	319	95	0.298	-1.746	4.29484632332376e-05	0.000668238	0.1174	0.1203	down
OsTN3g000572	17	20	11	7	50	104	18	75	4.115	2.041	0.0059845	0.0368397	0.3371	0.1514	up
OsTN3g000610	4	0	4	2	4	147	3	69	24.502	4.615	0.00132839	0.0110215	1.0385	0.229	up
OsTN3g000611	148	63	167	46	9	51	134	39	0.29	-1.786	0.00010824	0.00142045	0.1288	0.1692	down
OsTN3g000624	23	46	9	4	5	5	31	6	0.184	-2.446	0.000930947	0.00825704	0.2656	0.2072	down
OsTN3g000625	13	12	3	0	1	1	11	1	0.091	-3.456	0.00553413	0.0346611	0.6037	0.6924	down
OsTN3g000628	538	232	304	1313	671	385	372	841	2.258	1.175	0.00213834	0.0161668	0.1008	0.1854	up
OsTN3g000637	6	4	1	40	21	24	4	32	7.814	2.966	9.46229839412231e-08	3.7298691829768e-06	0.1019	0.2047	up
OsTN3g000638	5	10	2	28	53	46	7	55	8.297	3.053	2.30301047331668e-05	0.000404304	0.2609	0.1853	up
OsTN3g000639	5	29	13	72	267	213	20	254	12.958	3.696	6.0241590195506e-07	1.89546499002388e-05	0.301	0.1196	up
OsTN3g000681	2	0	0	144	51	32	1	76	93.002	6.539	1.20056390487727e-18	5.92101365830981e-16	0.1324	0.1914	up
OsTN3g000689	150	65	100	533	168	102	110	262	2.387	1.255	0.0011326	0.00968897	0.0976	0.1279	up
OsTN3g000692	3	9	2	197	184	162	6	217	39.271	5.295	1.33952525538167e-13	2.19893912795835e-11	0.219	0.1397	up
OsTN3g000695	63	33	31	13	5	9	44	10	0.222	-2.169	0.000102655	0.00136148	0.1539	0.2043	down
OsTN3g000704	114	37	109	494	315	153	91	353	3.879	1.956	3.165870246424e-06	7.77967674576056e-05	0.1121	0.1174	up
OsTN3g000730	1892	524	2825	2989	5102	5919	1857	6081	3.274	1.711	0.00134245	0.0111165	0.1938	0.1645	up
OsTN3g000736	19	19	11	175	126	337	18	261	14.324	3.84	3.66544752327218e-10	2.81641831978381e-08	0.1984	0.1191	up
OsTN3g000737	55	122	127	527	1208	2546	122	1917	15.842	3.986	1.08597879543211e-09	7.28808617554706e-08	0.2393	0.1877	up
OsTN3g000738	163	86	105	103	19	42	125	54	0.438	-1.189	0.000772877	0.00712007	0.0746	0.1313	down
OsTN3g000739	565	287	638	1	4	5	535	5	0.008	-7.008	2.01242884677521e-24	2.84517190357079e-21	0.168	0.1466	down
OsTN3g000740	394	100	310	0	1	0	274	1	0.002	-9.108	5.20033156899331e-28	1.10283431583641e-24	0.1505	0.115	down
OsTN3g000741	96	53	45	206	330	173	68	301	4.397	2.137	0.000409614	0.00423328	0.2346	0.1153	up
OsTN3g000756	47	18	19	89	58	45	28	72	2.481	1.311	0.00183929	0.014388	0.0995	0.1667	up
OsTN3g000759	0	0	3	2	1	31	1	15	12.006	3.586	0.00324609	0.0227495	0.6532	0.1876	up
OsTN3g000781	38	22	56	6	5	18	43	12	0.282	-1.827	0.00466661	0.0303698	0.2301	0.2072	down
OsTN3g000783	30	143	100	8	5	38	114	22	0.191	-2.392	0.0018348	0.014374	0.3586	0.1952	down
OsTN3g000795	0	0	0	13	11	14	0	15	122.039	6.931	5.81439025028053e-05	0.000850385	0.7892	1.5233	up
OsTN3g000796	38	17	21	89	40	45	27	63	2.355	1.236	0.00515361	0.0327027	0.11	0.1789	up
OsTN3g000803	27	36	28	105	118	368	35	254	7.277	2.863	7.4553137402585e-05	0.00104636	0.315	0.1159	up
OsTN3g000804	2	1	2	13	10	53	2	32	16.826	4.073	1.94656344343604e-06	5.17302894046969e-05	0.2835	0.2295	up
OsTN3g000812	170	109	166	1858	542	1302	161	1320	8.176	3.031	3.06164892326207e-12	3.79698179623501e-10	0.1141	0.1832	up
OsTN3g000821	30	24	21	8	4	3	28	5	0.201	-2.314	0.00010889	0.00142457	0.1467	0.2089	down
OsTN3g000830	14	7	16	0	0	3	13	1	0.101	-3.308	0.00562522	0.0351589	0.6202	0.6193	down
OsTN3g000833	90	22	23	1698	589	68	44	746	16.981	4.086	1.07335658661814e-07	4.16136620336578e-06	0.3258	0.1602	up
OsTN3g000845	13	16	9	162	44	50	15	84	6.02	2.59	1.38356431722996e-08	6.88761701302718e-07	0.1019	0.1819	up
OsTN3g000846	32	65	0	1402	644	669	39	977	25.18	4.654	2.79953322704778e-06	7.04266917508925e-05	0.5175	0.1757	up
OsTN3g000847	64	54	24	3	5	24	52	14	0.268	-1.902	0.0044322	0.0291815	0.2556	0.2023	down
OsTN3g000885	33	23	17	52	73	194	26	139	5.257	2.394	0.00032075	0.00345462	0.2697	0.1768	up
OsTN3g000887	92	172	89	41	14	45	140	37	0.27	-1.889	0.00110561	0.00950416	0.2099	0.1433	down
OsTN3g000889	4	11	0	62	114	81	6	111	18.476	4.208	5.26730609072153e-07	1.67471904446674e-05	0.3435	0.1774	up
OsTN3g000890	2	2	0	18	16	5	2	15	9.56	3.257	0.000555111	0.00543496	0.3377	0.3483	up
OsTN3g000899	49	19	16	17	2	4	29	7	0.263	-1.927	0.00531502	0.0334865	0.2545	0.216	down
OsTN3g000922	4	1	1	7	17	6	2	13	6.014	2.588	0.00732817	0.0429305	0.4144	0.2096	up
OsTN3g000928	200	26	77	483	279	51	96	285	2.943	1.557	0.00411963	0.0275512	0.1968	0.1238	up
OsTN3g000931	13	35	31	2	0	3	32	2	0.062	-4.016	2.12144508202058e-05	0.000377429	0.3699	0.2889	down
OsTN3g000936	152	100	116	40	21	26	133	32	0.243	-2.039	9.45038839882878e-06	0.000192152	0.1237	0.1572	down
OsTN3g000952	17	11	2	66	21	28	10	39	3.745	1.905	0.000802386	0.00733457	0.1666	0.201	up
OsTN3g000961	0	0	0	2	4	17	0	10	82.134	6.36	0.000436964	0.00445986	0.9314	0.7185	up
OsTN3g000963	347	122	148	140	72	55	208	96	0.461	-1.119	0.000807959	0.00736013	0.0704	0.1161	down
OsTN3g000965	7	2	5	36	26	6	5	25	4.962	2.311	0.00021432	0.0024715	0.1634	0.2327	up
OsTN3g000973	25	11	22	70	39	36	20	53	2.584	1.37	0.00122497	0.0103194	0.0917	0.1844	up
OsTN3g000984	29	47	41	83	287	466	46	382	8.386	3.068	7.91924530586974e-07	2.39576940373152e-05	0.2285	0.1288	up
OsTN3g000985	12	10	23	36	40	61	17	57	3.374	1.754	0.00103933	0.00904809	0.1577	0.1599	up
OsTN3g000986	7	16	9	22	65	149	13	107	8.432	3.076	1.3095233941503e-05	0.000252694	0.2742	0.1729	up
OsTN3g000996	52	13	52	288	106	94	40	167	4.11	2.039	1.54635428908075e-05	0.000290208	0.1357	0.1329	up
OsTN3g001007	6	3	3	133	93	36	4	97	22.12	4.467	5.89431076278701e-17	2.11865505671905e-14	0.1038	0.1694	up
OsTN3g001018	2	1	0	134	28	5	1	49	42.365	5.405	6.08467929327174e-08	2.56027368596059e-06	0.3628	0.2047	up
OsTN3g001022	161	57	95	16	16	26	107	24	0.217	-2.207	4.76757892876787e-07	1.53890481495251e-05	0.1027	0.1788	down
OsTN3g001032	9	14	0	82	13	13	9	32	3.763	1.912	0.00568875	0.0354381	0.2599	0.1891	up
OsTN3g001045	249	119	139	755	377	319	177	523	2.953	1.562	8.12045132142481e-05	0.00112189	0.1044	0.1741	up
OsTN3g001070	5	11	5	114	178	121	8	176	21.413	4.42	1.48867372742847e-11	1.57851518687877e-09	0.201	0.1158	up
OsTN3g001082	91	58	55	171	135	147	73	179	2.43	1.281	0.00035509	0.00376445	0.0797	0.1191	up
OsTN3g001090	83	58	49	41	6	18	68	21	0.317	-1.656	0.0023092	0.0172677	0.1745	0.1849	down
OsTN3g001092	82	40	93	32	22	28	77	32	0.41	-1.287	0.00854147	0.0482266	0.1434	0.1897	down
OsTN3g001094	807	135	773	280	138	146	583	206	0.353	-1.502	0.00211929	0.0160858	0.1617	0.1522	down
OsTN3g001096	10	4	1	1	0	0	5	0	0.09	-3.474	0.00491413	0.0315227	0.3836	0.9149	down
OsTN3g001097	12	19	8	0	0	0	15	0	0.008	-6.914	3.43438735685089e-07	1.1616116854344e-05	0.3037	0.3017	down
OsTN3g001106	33	14	25	111	50	26	25	65	2.552	1.352	0.00450344	0.0295769	0.1311	0.1841	up
OsTN3g001112	11	5	17	0	0	0	12	0	0.01	-6.591	1.24674970216241e-05	0.000243048	0.4573	1.0753	down
OsTN3g001114	0	3	2	54	21	4	2	26	12.606	3.656	6.57155629385116e-05	0.000940371	0.3485	0.2071	up
OsTN3g001116	0	0	0	47	65	17	0	53	422.145	8.722	1.03018049235663e-11	1.13197086535788e-09	0.313	0.208	up
OsTN3g001117	16	16	1	152	450	188	12	358	29.345	4.875	4.31251348042422e-08	1.88567986349189e-06	0.3932	0.1168	up
OsTN3g001121	1	7	1	22	22	29	4	30	8.101	3.018	0.000122629	0.00156523	0.2752	0.225	up
OsTN3g001128	52	14	14	262	60	19	26	103	3.904	1.965	0.000136383	0.00170435	0.1591	0.1408	up
OsTN3g001132	140	57	94	432	252	171	101	313	3.085	1.625	1.06419132006014e-05	0.000212909	0.0872	0.1188	up
OsTN3g001133	287	81	807	77	89	100	430	110	0.256	-1.964	0.00313435	0.0221493	0.291	0.1343	down
OsTN3g001140	0	1	0	18	8	8	0	12	24.065	4.589	0.00157457	0.0127256	0.7802	0.4651	up
OsTN3g001142	38	17	15	94	45	31	24	60	2.472	1.306	0.000910666	0.00811638	0.0799	0.1593	up
OsTN3g001163	75	93	50	185	197	108	83	197	2.371	1.245	0.00191326	0.0148734	0.1032	0.1189	up
OsTN3g001174	612	395	361	331	156	124	490	217	0.444	-1.172	0.00128122	0.0106929	0.0894	0.1572	down
OsTN3g001177	0	0	0	12	11	9	0	13	100.881	6.657	1.12307028139264e-06	3.21850695371535e-05	0.3086	0.3345	up
OsTN3g001178	2	0	3	21	17	13	2	20	10.399	3.378	2.55161147176007e-05	0.000439221	0.2261	0.2197	up
OsTN3g001182	65	74	74	95	178	175	81	195	2.414	1.271	0.00482863	0.0311595	0.1325	0.119	up
OsTN3g001185	39	8	25	6	0	2	24	2	0.115	-3.123	4.41789604717658e-05	0.000682874	0.2406	0.2612	down
OsTN3g001188	162	411	43	756	703	948	252	980	3.896	1.962	0.000934096	0.00827805	0.2334	0.176	up
OsTN3g001222	18	6	4	36	25	32	9	36	3.756	1.909	0.00151488	0.0123324	0.1879	0.2091	up
OsTN3g001232	0	0	0	26	37	20	0	35	274.748	8.102	6.23889820993775e-11	5.93310826628474e-09	0.2645	0.2055	up
OsTN3g001233	6	7	8	160	260	76	8	210	26.283	4.716	3.14588471537598e-12	3.85634550051899e-10	0.2121	0.115	up
OsTN3g001234	8	3	6	57	25	16	6	34	5.61	2.488	5.91330187019816e-06	0.000132282	0.1239	0.2021	up
OsTN3g001244	45	109	40	14	11	34	78	24	0.311	-1.687	0.00576297	0.0357668	0.2267	0.173	down
OsTN3g001246	0	0	0	0	1	22	0	11	83.957	6.392	0.000519057	0.00513416	0.9933	0.3806	up
OsTN3g001254	6	33	48	224	227	181	36	255	7.177	2.843	0.000106384	0.00140129	0.3252	0.1428	up
OsTN3g001258	1	0	0	4	9	5	0	8	16.699	4.062	0.00157444	0.0127256	0.4955	1.2218	up
OsTN3g001275	335	142	124	63	30	68	205	62	0.299	-1.744	3.58627227060853e-06	8.6034022672845e-05	0.0859	0.1155	down
OsTN3g001276	1734	1325	1007	127	177	422	1479	315	0.213	-2.234	1.83620354292312e-05	0.000334827	0.1772	0.1893	down
OsTN3g001278	289	112	145	56	11	39	187	37	0.199	-2.326	2.16843110004755e-07	7.75479229995081e-06	0.1183	0.1359	down
OsTN3g001283	7	11	15	43	19	37	13	37	2.942	1.557	0.00225011	0.0168973	0.1266	0.1916	up
OsTN3g001285	162	126	53	702	234	241	123	400	3.256	1.703	2.13447176424062e-05	0.000379428	0.1045	0.1431	up
OsTN3g001288	1	0	1	10	20	6	1	16	18.564	4.214	0.000128937	0.00163276	0.4161	0.2009	up
OsTN3g001302	30	11	11	78	72	16	17	64	3.552	1.829	0.0016007	0.012898	0.1957	0.1933	up
OsTN3g001303	35	4	27	121	46	17	22	61	2.742	1.455	0.00755727	0.0438487	0.1778	0.1987	up
OsTN3g001307	78	39	22	276	164	80	48	188	3.911	1.968	5.33840198229214e-06	0.000121733	0.1139	0.1209	up
OsTN3g001321	1	0	0	58	35	5	0	35	74.291	6.215	3.25613595869769e-07	1.10839286157467e-05	0.4541	0.2368	up
OsTN3g001346	19	31	8	6	3	7	22	6	0.275	-1.863	0.00879407	0.0492169	0.2462	0.3689	down
OsTN3g001350	0	0	0	0	13	6	0	9	74.339	6.216	0.000194307	0.00229563	0.6768	0.3163	up
OsTN3g001358	118	100	89	706	211	190	113	366	3.244	1.698	4.87754950148152e-05	0.000737264	0.1138	0.1307	up
OsTN3g001364	0	6	2	26	26	15	3	27	7.946	2.99	0.000378818	0.0039672	0.3204	0.2446	up
OsTN3g001404	1139	576	818	2	8	0	895	5	0.005	-7.723	4.9783388850994e-21	3.77055831201082e-18	0.239	0.173	down
OsTN3g001417	0	0	0	16	4	2	0	7	56.385	5.817	0.00415736	0.0277773	1.4477	1.1645	up
OsTN3g001418	2797	2287	2066	6750	6481	3859	2627	6768	2.576	1.365	0.000515274	0.00511105	0.1072	0.1473	up
OsTN3g001419	598	183	201	1943	771	510	325	1100	3.379	1.756	2.44345590309195e-05	0.000424046	0.1161	0.1884	up
OsTN3g001422	53	34	8	184	82	69	33	118	3.547	1.827	0.000226021	0.00258674	0.1488	0.1479	up
OsTN3g001424	109	87	75	276	361	219	99	355	3.571	1.836	3.88507331019935e-05	0.000619479	0.1286	0.1191	up
OsTN3g001430	41	17	44	173	99	210	36	189	5.181	2.373	1.44803855866061e-06	4.040599172831e-05	0.1447	0.129	up
OsTN3g001437	2	0	0	2	7	13	1	10	12.429	3.636	0.00160077	0.012898	0.4643	0.368	up
OsTN3g001439	18	25	9	128	97	69	20	113	5.728	2.518	5.87248891141559e-08	2.48578587513753e-06	0.1145	0.1641	up
OsTN3g001449	100	85	77	63	19	29	97	38	0.401	-1.317	0.00174754	0.0138179	0.105	0.1461	down
OsTN3g001450	109	53	59	54	16	20	77	30	0.401	-1.32	0.00183471	0.014374	0.1027	0.1623	down
OsTN3g001460	31	2	7	100	71	18	12	70	5.443	2.444	0.000114314	0.00148282	0.2275	0.194	up
OsTN3g001465	1106	395	473	4249	1377	1751	667	2533	3.794	1.924	6.49139180013079e-07	2.02148231872795e-05	0.0997	0.1804	up
OsTN3g001468	315	149	289	1264	479	273	267	678	2.535	1.342	0.000995227	0.00873584	0.1131	0.1792	up
OsTN3g001473	959	800	1107	86	265	168	1064	236	0.221	-2.177	0.000206684	0.00239517	0.2249	0.1855	down
OsTN3g001474	1063	373	683	83	172	102	727	156	0.214	-2.223	0.000199802	0.00233842	0.2316	0.1688	down
OsTN3g001490	607	140	509	0	12	51	428	29	0.068	-3.871	6.20343288971015e-05	0.000897382	0.5227	0.1188	down
OsTN3g001494	41	66	48	250	90	74	60	141	2.353	1.234	0.00456366	0.0298524	0.12	0.1283	up
OsTN3g001498	15	8	8	38	51	21	11	45	4.056	2.02	0.000909538	0.00811638	0.199	0.2044	up
OsTN3g001500	13	22	13	41	72	18	19	56	2.968	1.57	0.00651868	0.0392175	0.1919	0.1973	up
OsTN3g001507	262	140	160	6	5	19	198	13	0.061	-4.033	1.02148999316452e-15	2.70784228563e-13	0.1168	0.1206	down
OsTN3g001520	1	2	1	4	10	11	2	11	6.771	2.759	0.00416105	0.0277932	0.344	0.6549	up
OsTN3g001529	3	3	0	27	12	29	2	26	11.365	3.507	0.000134489	0.00168564	0.3688	0.2676	up
OsTN3g001535	4	0	0	44	11	6	1	19	13.557	3.761	4.18281298060171e-05	0.000655617	0.3202	0.2635	up
OsTN3g001537	109	69	41	251	70	136	77	158	2.049	1.035	0.0037529	0.0255007	0.08	0.1157	up
OsTN3g001545	5	13	2	36	28	26	8	35	4.381	2.131	0.00684895	0.0406509	0.3445	0.2182	up
OsTN3g001546	0	3	2	30	3	7	2	12	6.044	2.596	0.00498617	0.0318647	0.3517	0.431	up
OsTN3g001547	45	15	15	276	81	58	25	135	5.318	2.411	2.85763207500448e-07	9.85395177473497e-06	0.1257	0.1498	up
OsTN3g001550	71	27	31	4	0	0	44	1	0.034	-4.897	2.87347394085461e-12	3.60578472566295e-10	0.1402	0.207	down
OsTN3g001553	147	73	150	73	58	24	132	59	0.441	-1.182	0.00191016	0.0148547	0.0883	0.1243	down
OsTN3g001557	0	0	0	0	0	19	0	9	69.02	6.109	0.00115201	0.00981942	1.0738	0.3094	up
OsTN3g001565	2	5	2	14	18	12	4	18	5.081	2.345	0.00206675	0.0157831	0.2422	0.2244	up
OsTN3g001584	25	8	44	288	42	24	27	102	3.694	1.885	0.00479956	0.0309853	0.2825	0.1535	up
OsTN3g001585	41	22	27	181	56	30	32	86	2.725	1.446	0.000724018	0.00675803	0.1064	0.1609	up
OsTN3g001588	0	0	1	7	16	20	0	19	38.623	5.271	1.28007675117319e-05	0.000248141	0.4386	0.2122	up
OsTN3g001598	314	233	344	1757	781	635	328	1118	3.416	1.772	1.45055740935029e-05	0.000274906	0.1116	0.186	up
OsTN3g001602	2	17	0	17	81	21	9	56	6.782	2.762	0.00371546	0.0252787	0.5162	0.2037	up
OsTN3g001603	1	5	2	13	18	16	3	20	6.087	2.606	0.000660171	0.00626395	0.2367	0.2227	up
OsTN3g001612	0	0	1	5	17	12	0	16	31.162	4.962	3.80378620025611e-05	0.000609267	0.4265	0.2833	up
OsTN3g001613	1	0	2	5	8	6	1	8	6.624	2.728	0.00785862	0.045177	0.3572	0.2066	up
OsTN3g001647	153	93	156	671	956	328	146	811	5.567	2.477	3.28939138995301e-07	1.11791864113355e-05	0.1488	0.1767	up
OsTN3g001649	9	30	10	4	0	6	20	4	0.19	-2.393	0.00323642	0.0227006	0.3058	0.2853	down
OsTN3g001650	244	85	189	33	2	44	179	29	0.162	-2.624	2.91779302674843e-05	0.000489151	0.2362	0.1496	down
OsTN3g001652	689	338	410	9	9	21	504	16	0.031	-4.991	3.97601386507601e-21	3.18344147064129e-18	0.1283	0.1446	down
OsTN3g001654	54	9	55	106	111	97	40	128	3.118	1.641	0.000434069	0.00444057	0.1336	0.115	up
OsTN3g001659	1	0	0	5	6	11	0	9	19.535	4.288	0.000249284	0.00280603	0.3532	0.2505	up
OsTN3g001666	0	0	0	9	21	0	0	13	104.703	6.71	0.000208654	0.00241535	0.9295	0.5855	up
OsTN3g001672	11	0	5	49	61	14	5	50	9.229	3.206	8.21123964263074e-06	0.000171901	0.2538	0.2026	up
OsTN3g001677	11	2	19	183	117	59	11	132	11.449	3.517	4.86561499535647e-09	2.81158303015054e-07	0.1857	0.1356	up
OsTN3g001681	97	43	87	233	191	66	80	186	2.308	1.207	0.00680544	0.0404606	0.1301	0.1187	up
OsTN3g001687	70	58	32	21	14	16	58	20	0.334	-1.583	0.00362274	0.0247671	0.1689	0.1999	down
OsTN3g001699	125	130	81	69	34	36	126	51	0.404	-1.307	0.00186382	0.0145423	0.1085	0.1328	down
OsTN3g001700	32	21	9	147	28	51	22	73	3.361	1.749	5.032150302559e-05	0.000758471	0.1003	0.164	up
OsTN3g001704	104	46	46	1154	346	154	67	527	7.793	2.962	1.14020580151135e-07	4.38049717982811e-06	0.1881	0.17	up
OsTN3g001718	108	70	85	588	122	70	95	236	2.503	1.324	0.00265635	0.0193518	0.1281	0.1292	up
OsTN3g001745	94	63	55	778	333	345	76	517	6.789	2.763	1.82735009017639e-09	1.17077381759428e-07	0.1277	0.148	up
OsTN3g001753	14	3	6	0	0	1	7	0	0.065	-3.951	0.00113217	0.00968897	0.3974	0.8989	down
OsTN3g001754	16	18	4	1	0	0	14	0	0.032	-4.948	0.000109569	0.0014308	0.5129	0.534	down
OsTN3g001765	29	6	7	3	1	0	13	1	0.109	-3.201	0.000741778	0.00688442	0.3418	0.709	down
OsTN3g001784	301	331	759	19	35	37	532	40	0.073	-3.767	1.31264443110337e-10	1.11349001801636e-08	0.189	0.1487	down
OsTN3g001786	142	111	77	11	11	11	120	13	0.107	-3.226	8.98068137492921e-14	1.56109270424692e-11	0.0836	0.1588	down
OsTN3g001787	7	21	0	1	1	0	12	1	0.074	-3.755	0.00832352	0.0472982	0.8816	0.7094	down
OsTN3g001790	0	0	0	0	0	25	0	11	91.335	6.513	0.00582145	0.0360454	2.2064	0.9046	up
OsTN3g001791	1439	902	732	5818	1652	1156	1094	2782	2.543	1.346	0.000452909	0.00459342	0.1019	0.1671	up
OsTN3g001802	32	11	24	6	4	1	23	4	0.175	-2.516	0.000508361	0.00505192	0.2299	0.3153	down
OsTN3g001804	5	12	1	50	9	33	7	32	4.535	2.181	0.00117468	0.00996858	0.2254	0.222	up
OsTN3g001815	137	79	189	143	20	33	147	60	0.415	-1.27	0.00236773	0.017622	0.1109	0.1281	down
OsTN3g001836	264	153	130	65	34	36	193	50	0.257	-1.961	3.47956069235143e-07	1.17128640639201e-05	0.0875	0.1169	down
OsTN3g001840	58	54	39	191	82	73	56	122	2.194	1.134	0.00164469	0.013152	0.0774	0.1254	up
OsTN3g001847	2	5	4	73	44	10	5	45	10.441	3.384	1.9538290490963e-05	0.000352038	0.298	0.196	up
OsTN3g001848	1	0	6	30	46	2	3	32	11.835	3.565	0.000421996	0.00434641	0.4925	0.2148	up
OsTN3g001854	1	0	0	22	8	4	0	11	24.912	4.639	0.00059434	0.00576784	0.6243	1.0005	up
OsTN3g001874	168	119	106	0	0	25	142	11	0.079	-3.661	0.000355849	0.00376947	0.5822	0.1929	down
OsTN3g001878	20	6	11	66	11	24	12	32	2.591	1.373	0.00447699	0.0294216	0.1126	0.2067	up
OsTN3g001897	0	0	0	0	5	3	0	4	30.565	4.934	0.00483106	0.0311595	0.7384	0.2574	up
OsTN3g001906	7	8	2	1	0	0	6	0	0.071	-3.818	0.00684407	0.0406333	0.6828	0.812	down
OsTN3g001907	2057	431	1163	70	31	16	1210	40	0.033	-4.901	1.73978197962065e-10	1.4412326735084e-08	0.3	0.1869	down
OsTN3g001910	745	227	436	124	27	86	477	83	0.174	-2.521	1.34415789455611e-05	0.000258437	0.2104	0.172	down
OsTN3g001915	27	31	4	93	76	48	23	84	3.618	1.855	0.00102647	0.00896555	0.1898	0.1804	up
OsTN3g001919	26	16	15	3	4	2	20	4	0.177	-2.495	0.00305071	0.0216666	0.3301	0.3257	down
OsTN3g001927	248	104	225	167	31	49	203	79	0.392	-1.35	0.000466011	0.00469486	0.0953	0.1159	down
OsTN3g001928	0	0	0	1	6	10	0	8	62.349	5.962	0.000397654	0.00413237	0.6931	0.6924	up
OsTN3g001935	2516	1719	1962	5497	4659	3945	2246	5551	2.471	1.305	0.000134099	0.00168275	0.0811	0.1506	up
OsTN3g001966	217	176	138	80	26	74	195	66	0.342	-1.548	0.00102982	0.00898743	0.1429	0.1152	down
OsTN3g001972	11	37	11	71	64	73	25	84	3.482	1.8	0.00143399	0.0117871	0.1892	0.178	up
OsTN3g001988	2	11	4	40	34	29	7	41	5.855	2.55	0.000299379	0.00326759	0.2507	0.2075	up
OsTN3g001990	50	20	31	758	193	144	35	348	9.893	3.306	1.2757824841799e-14	2.6014922251926e-12	0.101	0.1225	up
OsTN3g001992	69	29	31	156	63	49	44	93	2.083	1.059	0.00460379	0.0300413	0.0816	0.1449	up
OsTN3g002010	108	70	81	429	134	243	93	283	3.037	1.603	2.81934384275001e-05	0.000476413	0.0937	0.1168	up
OsTN3g002038	290	130	407	73	65	96	298	95	0.318	-1.655	0.000322984	0.00347516	0.1375	0.1162	down
OsTN3g002041	93	37	57	18	11	21	65	20	0.3	-1.737	0.00287809	0.0206201	0.1988	0.1912	down
OsTN3g002050	89	57	89	45	27	14	85	31	0.367	-1.447	0.00144006	0.0118278	0.1205	0.1665	down
OsTN3g002052	81	11	51	177	138	76	47	149	3.136	1.649	0.00139662	0.0114978	0.1698	0.1221	up
OsTN3g002064	66	71	87	395	433	108	85	371	4.374	2.129	1.08374681752464e-05	0.000215803	0.1487	0.1175	up
[truncated: 1,886 more rows]

## Sheet: Table 3
Table 3. Differentially expressed gene sets in over-expression BSCL1_wt TN1 rice with and without BPH feeding.
[truncated: 3,230 more rows]

[truncated: 4 more sheets: Table 4, Table 5, Table 6, Table 7]
