# Supplementary material for: Insect-derived long non-coding RNAs function as epigenetic effectors to reprogram plant immunity
Source: Research Square preprint supplement (doi:10.21203/rs.3.rs-8297537/v1), 2025-12-12
Supplement: Supplementary file 6 [file d961fb4b191156ecabb43429.xlsx]

## Sheet: Sheet1
Supplementary data 5. List of differentially expressed genes and their expression patterns in different clusters
Gene_ID	TN1-CK	TN1-FS	35S::GFP-CK	35S::GFP-FS	35S::BSCL1_wt-CK	35S::BSCL1_wt-FS	Cluster
OsTN1g000009	-0.910109	-0.0377444	-0.575956	-0.289688	1.93394	-0.120444	4
OsTN1g000013	1.20797	-0.535734	0.991784	-0.85918	0.374778	-1.17962	8
OsTN1g000016	-0.25526	-0.57508	-0.101467	-0.565337	2.00426	-0.507116	4
OsTN1g000022	-0.266873	1.35527	-0.965437	0.954577	-1.11678	0.0392388	7
OsTN1g000023	-1.03389	0.525684	-0.952771	1.13604	-0.675266	1.0002	2
OsTN1g000024	-0.903278	0.0901926	-1.08985	0.986469	-0.434822	1.35129	2
OsTN1g000033	-1.74288	0.682087	-0.587563	0.522075	0.213083	0.913198	2
OsTN1g000037	-0.351181	0.361271	-1.06434	1.31264	-1.09277	0.834373	3
OsTN1g000038	0.314263	-0.664266	-0.583291	-1.25201	1.3794	0.80591	4
OsTN1g000043	0.418128	-0.854743	1.1521	-1.16628	1.03331	-0.582505	5
OsTN1g000044	0.45595	-0.915205	0.78001	-1.08138	1.35176	-0.591137	5
OsTN1g000046	-0.00660264	0.496786	0.355553	1.30503	-1.62799	-0.522771	1
OsTN1g000051	1.88719	-1.0055	-0.0650053	-0.488879	0.0915425	-0.419349	8
OsTN1g000052	-1.20596	0.784113	-1.06502	0.840688	-0.340621	0.986802	2
OsTN1g000059	-0.809653	1.59111	-0.897868	0.38796	-0.775806	0.504256	7
OsTN1g000063	-0.459364	0.760828	-0.921368	1.63596	-0.798417	-0.21764	1
OsTN1g000067	1.00471	-0.56577	0.919887	-0.759337	0.717107	-1.3166	8
OsTN1g000077	0.237387	-0.832793	0.370838	-0.722891	1.72696	-0.7795	5
OsTN1g000078	0.217954	-0.833997	0.388975	-0.726208	1.72642	-0.773142	5
OsTN1g000082	-0.230561	-0.584452	0.0258411	-0.651091	1.97382	-0.533562	4
OsTN1g000086	1.12174	0.00398839	0.950988	-1.14426	0.273106	-1.20557	8
OsTN1g000087	1.2246	-0.00348949	0.668292	-1.22285	0.484101	-1.15066	8
OsTN1g000090	-0.796663	0.413349	-0.875655	0.821931	-0.934005	1.37104	2
OsTN1g000093	0.318435	-0.956151	-0.172267	-1.12135	1.61074	0.320592	4
OsTN1g000094	0.0413603	-0.813184	-0.693592	-0.884768	1.56971	0.780469	4
OsTN1g000104	-1.18514	0.188662	-0.72555	1.24948	-0.588521	1.06107	2
OsTN1g000121	-0.464181	2.02505	-0.525778	-0.186334	-0.502941	-0.345817	7
OsTN1g000122	-0.456432	2.02679	-0.521021	-0.196304	-0.497075	-0.355959	7
OsTN1g000131	-0.899971	0.268374	-1.07897	1.06361	-0.574655	1.22162	2
OsTN1g000133	-1.20375	0.727799	-1.28414	0.319328	0.379511	1.06126	2
OsTN1g000136	1.75653	-0.51244	-0.544265	-1.10885	0.0585993	0.350418	8
OsTN1g000139	-0.159384	-0.799734	-0.564929	-0.719163	1.82256	0.420647	4
OsTN1g000140	1.15754	-0.548273	1.37077	-0.993708	-0.435549	-0.550772	6
OsTN1g000141	1.12841	-0.537706	1.39738	-0.98283	-0.419935	-0.585318	6
OsTN1g000142	1.10665	-0.440409	1.40985	-0.935595	-0.38588	-0.754617	6
OsTN1g000144	-1.17365	1.3064	-0.705727	0.976593	-0.639206	0.235592	3
OsTN1g000148	1.34211	-0.472186	-0.306724	-0.848377	1.17246	-0.887289	5
OsTN1g000158	-0.67146	1.89115	-0.503477	0.184192	-0.824307	-0.076099	7
OsTN1g000159	-0.348582	2.02335	-0.372858	-0.328743	-0.665335	-0.307837	7
OsTN1g000171	-0.454635	-0.402626	-0.233076	2.03283	-0.484006	-0.458488	1
OsTN1g000172	-0.540891	0.0372372	0.680784	1.58813	-1.16755	-0.597714	1
OsTN1g000181	-0.423866	-0.621885	-0.443059	-0.59171	0.112119	1.9684	2
OsTN1g000182	-0.391204	-0.607215	-0.406053	-0.658522	1.96738	0.0956157	4
OsTN1g000187	-0.891197	1.29736	-1.06635	0.897438	-0.643982	0.406731	3
OsTN1g000190	0.128035	-0.789165	1.46637	-0.951487	0.877659	-0.731414	5
OsTN1g000196	0.0370339	1.47268	0.0994181	0.480608	-1.49513	-0.594615	7
OsTN1g000197	-0.481376	0.249632	-0.356907	1.91886	-0.742039	-0.588169	1
OsTN1g000198	-1.10861	1.28189	0.340102	0.906511	-1.01182	-0.408069	7
OsTN1g000200	-0.967273	1.031	-0.456265	1.23586	-1.09631	0.252996	3
OsTN1g000204	-0.940489	0.96795	-1.01581	1.01826	-0.759727	0.729825	3
OsTN1g000212	-0.308066	0.87273	-0.926414	1.55744	-0.86687	-0.328818	1
OsTN1g000233	-1.17624	0.737371	-1.15056	0.770517	-0.230826	1.04974	2
OsTN1g000234	-1.00534	0.310754	-1.01461	0.762392	-0.484162	1.43096	2
OsTN1g000235	-0.190716	-0.549067	-0.0936387	-0.671344	1.99144	-0.486673	4
OsTN1g000238	1.06386	-0.945929	0.379105	-0.911118	1.18526	-0.77118	5
OsTN1g000240	0.170477	-0.632019	0.610653	-0.906458	1.62168	-0.864334	5
OsTN1g000244	-1.1296	0.650691	-1.10172	0.930444	-0.38545	1.03563	2
OsTN1g000246	-0.702255	0.833222	-0.606538	1.6092	-0.892855	-0.240776	1
OsTN1g000247	-0.220342	-0.661155	0.00166933	-0.640667	1.97431	-0.453819	4
OsTN1g000251	1.6075	0.242802	0.270284	-1.28453	-0.0409102	-0.795145	6
OsTN1g000256	-0.734248	0.821043	-0.820246	1.40326	-1.01333	0.343518	3
OsTN1g000276	-0.794488	0.656367	-0.885103	1.02761	-1.02654	1.02215	3
OsTN1g000278	-0.673582	1.13711	-0.932534	1.2597	-0.887384	0.0966863	3
OsTN1g000279	-0.780164	1.22808	-0.713544	1.20305	-0.962326	0.0249057	3
OsTN1g000283	-0.899224	1.20111	-0.89749	0.875895	-0.894057	0.613761	3
OsTN1g000287	-0.711331	0.464195	-0.698547	1.8259	-0.62619	-0.25403	1
OsTN1g000289	0.294013	-0.726981	-0.992617	-0.796235	1.49661	0.725207	4
OsTN1g000296	-0.114251	-0.598352	-0.144011	-0.646606	1.98859	-0.485371	4
OsTN1g000297	0.0762004	-0.870792	-0.205689	-0.823141	1.87442	-0.0509967	4
OsTN1g000308	-0.875102	0.0712624	-0.939325	1.74182	-0.394836	0.396183	3
OsTN1g000319	0.384903	1.52548	0.284936	-1.43555	-0.162912	-0.596848	7
OsTN1g000321	-0.596251	0.669218	-1.03874	1.20649	-1.02398	0.78326	3
OsTN1g000326	-1.20651	0.683095	-1.25285	1.08141	0.126982	0.567876	2
OsTN1g000362	1.22748	-0.636701	1.35138	-0.601973	-0.644834	-0.695347	6
OsTN1g000364	1.34021	-0.695143	1.23539	-0.632381	-0.535587	-0.712495	6
OsTN1g000365	-0.551541	-0.303656	-0.753728	-0.332494	1.98075	-0.0393359	4
OsTN1g000366	0.212359	-0.755845	-0.0415623	-0.584782	1.88022	-0.710394	4
OsTN1g000371	-0.346672	-0.388838	-0.631066	-0.694075	1.95917	0.101483	4
OsTN1g000372	1.40823	-0.795728	1.1008	-0.274937	-0.543226	-0.895136	6
OsTN1g000378	-0.0933572	-0.670898	-0.0436423	-0.668975	1.96342	-0.486547	4
OsTN1g000386	0.123666	1.81505	-0.211342	-1.22132	-0.366972	-0.139075	7
OsTN1g000401	-1.00654	0.478854	-0.7491	0.89518	-0.886752	1.26836	2
OsTN1g000402	-0.481026	1.24553	-1.19946	0.369421	-0.872756	0.938292	3
OsTN1g000406	-0.711954	1.36568	-0.853329	0.938139	-0.980433	0.241898	3
OsTN1g000434	-1.26916	0.603106	-1.14086	1.00232	-0.0424519	0.847045	2
OsTN1g000435	-0.112412	-0.751935	-0.750723	-0.759561	1.66794	0.706691	4
OsTN1g000442	-1.10652	0.303986	-0.627998	0.760412	-0.779852	1.44997	2
OsTN1g000443	-0.889515	0.407057	-0.856136	0.792025	-0.852199	1.39877	2
OsTN1g000467	1.03808	-0.811371	0.578256	-1.34519	0.968051	-0.427826	5
OsTN1g000471	0.666981	-0.654865	1.67151	-0.15129	-0.505939	-1.02639	6
OsTN1g000473	-0.984825	-0.136458	-0.930581	1.31577	-0.388044	1.12414	2
OsTN1g000477	-0.0242815	-0.534052	1.95872	-0.560078	-0.095432	-0.744872	6
OsTN1g000479	-0.331614	-0.586284	-0.40686	-0.589118	2.00628	-0.0924065	4
OsTN1g000481	1.29137	-1.3984	-0.0797682	-0.545858	1.00042	-0.267757	5
OsTN1g000482	1.55815	-0.523518	0.53687	-0.741306	0.331808	-1.162	8
OsTN1g000484	1.42445	-1.03031	0.434983	-0.713524	0.718217	-0.833814	8
OsTN1g000485	-0.88704	1.67052	-0.476511	-0.0267353	-0.900212	0.61998	7
OsTN1g000486	0.541429	-0.689744	1.46789	-1.07117	0.545936	-0.794341	8
OsTN1g000495	-1.08395	0.487033	-0.955045	1.02587	-0.598627	1.12472	2
OsTN1g000498	0.545188	-0.414196	0.101617	-1.27431	1.60585	-0.564152	5
OsTN1g000504	-0.683423	-0.21843	-0.0537937	-1.01458	0.115613	1.85461	2
OsTN1g000510	0.645469	-0.629903	1.09891	-1.22173	0.914034	-0.806778	8
OsTN1g000512	1.46449	-0.169946	0.96275	-0.703826	-0.462478	-1.09099	6
OsTN1g000514	0.354353	-0.807242	0.208194	-0.963665	1.72684	-0.518481	5
OsTN1g000515	-0.221932	-0.560756	-0.289297	-0.641403	2.01284	-0.299454	4
OsTN1g000516	-0.455598	-0.429947	0.394767	1.79879	-1.07866	-0.229353	1
OsTN1g000520	0.725438	-0.875029	0.430121	-1.10602	1.40246	-0.576969	5
OsTN1g000525	1.24573	-0.68115	0.861785	-0.86129	0.536005	-1.10108	8
OsTN1g000533	1.7927	-0.363576	0.545061	-0.554772	-0.565153	-0.854264	6
OsTN1g000540	-0.458418	1.12408	-0.740187	1.12499	-1.28717	0.23671	3
OsTN1g000541	1.06254	-0.751586	0.717243	-0.896757	0.928985	-1.06043	8
OsTN1g000548	1.24214	-0.938072	0.693351	-0.733745	0.740871	-1.00454	8
OsTN1g000554	1.74938	-0.602701	0.378695	-0.881013	0.151766	-0.796122	8
OsTN1g000562	-0.34836	-0.469702	-0.367667	-0.485567	2.03782	-0.366528	4
OsTN1g000575	-0.208203	-0.614227	-0.197075	-0.629645	2.00446	-0.355306	4
OsTN1g000576	-0.909685	0.595617	-0.871099	1.17166	-0.911402	0.924908	3
OsTN1g000590	1.75781	-0.632998	0.645062	-0.470172	-0.532246	-0.767451	6
OsTN1g000591	1.71348	-0.637435	0.726189	-0.497219	-0.52692	-0.778097	6
OsTN1g000594	0.0448746	-0.958845	1.06629	-1.27611	1.14573	-0.0219429	5
OsTN1g000595	0.0190143	-0.979373	1.09894	-1.24244	1.13498	-0.0311135	5
OsTN1g000598	0.30812	-0.996505	0.660299	-1.19534	1.41757	-0.194148	5
OsTN1g000599	-0.510824	-0.612252	0.395338	-0.61845	1.88126	-0.53507	4
OsTN1g000602	1.82599	-0.736492	-0.00601294	-0.00681088	-0.0169842	-1.05969	6
OsTN1g000610	0.89415	-0.5023	1.46532	-0.835907	0.0282565	-1.04952	6
OsTN1g000613	-1.09053	0.747873	-0.978454	0.976393	-0.628046	0.972764	2
OsTN1g000614	-1.06203	0.467421	-0.942204	1.08744	-0.636232	1.08561	2
OsTN1g000622	-0.454501	-0.121537	0.175772	1.89566	-0.882137	-0.613253	1
OsTN1g000625	0.93866	-0.535632	1.09312	0.623142	-1.09892	-1.02037	6
OsTN1g000629	-0.808741	1.16972	-0.797966	0.464889	-1.04459	1.01669	3
OsTN1g000630	-0.54261	0.559129	-0.858349	1.50074	-1.0998	0.440889	3
OsTN1g000631	-0.569346	-0.0660425	-0.535928	1.99673	-0.581068	-0.244344	1
OsTN1g000633	1.35286	-0.814739	-0.0887884	-0.770918	1.12309	-0.801512	5
OsTN1g000634	-0.914768	0.246726	-1.50427	0.686578	0.379274	1.10646	2
OsTN1g000645	-0.541692	1.91034	-0.698165	0.259829	-0.651571	-0.278738	7
OsTN1g000646	-0.0785563	1.45485	-1.102	0.338944	-1.13122	0.51798	7
OsTN1g000662	-1.10687	0.342713	-0.273836	1.61386	-0.925137	0.349274	1
OsTN1g000663	0.932422	-1.25474	0.554264	-1.13728	0.975057	-0.0697208	5
OsTN1g000664	1.19868	-1.20302	0.591236	-1.04636	0.761676	-0.302222	8
OsTN1g000665	1.04738	-0.97509	0.792702	-1.00874	0.876837	-0.733087	8
OsTN1g000666	1.00788	-0.985922	0.800606	-1.00744	0.910713	-0.725834	8
OsTN1g000667	0.808238	-1.03291	1.15482	-0.985017	0.72546	-0.670587	8
OsTN1g000679	-1.25335	-0.123656	-0.591112	0.752049	-0.329889	1.54596	2
OsTN1g000680	-1.19798	0.160536	-1.16324	0.69928	0.216911	1.28449	2
OsTN1g000685	1.8607	-0.117845	0.235529	-0.547939	-0.445859	-0.984586	6
OsTN1g000687	-0.620596	0.349842	-0.368065	1.84016	-0.95367	-0.247667	1
OsTN1g000693	0.509454	-1.03115	0.834295	-1.24633	1.17109	-0.237366	5
OsTN1g000696	1.05915	-1.02761	0.401343	-0.993935	1.15112	-0.590065	5
OsTN1g000705	-0.148008	-0.305168	-0.384807	0.0117272	1.89559	-1.06934	4
OsTN1g000708	-0.969789	0.591461	-0.911554	1.40625	-0.726932	0.610569	3
OsTN1g000712	0.167611	0.150095	0.878376	0.40649	-1.96929	0.366721	1
OsTN1g000713	-0.308198	-0.606262	-0.174096	-0.618371	2.00845	-0.301519	4
OsTN1g000714	-0.318797	-0.590354	-0.191508	-0.604017	2.01324	-0.308561	4
OsTN1g000716	0.628163	-0.882479	0.517792	-0.883027	1.44707	-0.827519	5
OsTN1g000725	1.31615	-0.991299	0.392618	-1.09455	0.844968	-0.467889	8
OsTN1g000730	1.21793	0.732995	-1.10308	-0.400959	-1.09004	0.643152	7
OsTN1g000736	1.78745	-0.300665	0.511512	-0.65405	-0.425453	-0.918794	6
OsTN1g000739	1.17387	-0.820036	1.26392	-0.860046	0.0244471	-0.782163	6
OsTN1g000740	1.27072	-0.998803	1.13374	-0.664111	0.0687153	-0.810263	8
OsTN1g000741	1.29989	-1.03014	0.804158	-0.772728	0.542222	-0.843403	8
OsTN1g000757	-0.472287	-0.517622	-0.00978171	-0.516873	2.00162	-0.485055	4
OsTN1g000762	-1.06915	1.40084	-0.815296	0.176722	-0.605349	0.912232	3
OsTN1g000765	1.0735	-0.689943	0.884046	-0.882657	0.739419	-1.12437	8
OsTN1g000789	0.948731	-0.837148	1.4182	-0.883287	0.123193	-0.769691	8
OsTN1g000790	0.946285	-0.826117	1.41923	-0.885515	0.125803	-0.779684	8
OsTN1g000791	0.954161	-0.496302	0.723009	-1.14494	0.98428	-1.0202	8
OsTN1g000792	0.972004	-0.314835	0.298083	-1.18855	1.21832	-0.985028	5
OsTN1g000794	0.924314	-0.39696	0.584664	-1.17335	1.09547	-1.03414	8
OsTN1g000795	0.263674	-1.12766	1.16539	-1.06574	1.04279	-0.278453	5
OsTN1g000796	-0.0670345	-1.0565	0.046534	-1.06529	1.54422	0.598068	4
OsTN1g000800	-0.861255	0.466049	-0.842759	-0.327589	1.78228	-0.216723	4
OsTN1g000801	0.48058	-0.93657	0.406204	-1.16071	1.51271	-0.302215	5
OsTN1g000802	1.38647	-0.263376	0.606389	-1.20909	0.462058	-0.982457	8
OsTN1g000805	-0.933941	0.287046	-1.05802	1.2331	-0.568492	1.0403	2
OsTN1g000809	-0.753977	1.36978	-0.70785	1.12589	-0.871978	-0.161865	3
OsTN1g000817	1.49764	-0.77611	-0.377611	-0.6438	1.03104	-0.731165	8
OsTN1g000818	-0.353787	1.76394	-0.604165	0.607942	-0.827704	-0.586223	7
OsTN1g000827	-0.702537	0.134996	-1.52952	0.450396	0.280104	1.36656	2
OsTN1g000830	-0.678957	1.39354	-0.738961	0.322044	-1.12428	0.826611	3
OsTN1g000832	-0.770287	1.62379	-0.681415	0.53631	-0.973516	0.265123	7
OsTN1g000834	-0.051114	-0.718052	-0.319965	-0.708404	1.96225	-0.164719	4
OsTN1g000840	0.906178	0.0337001	1.32268	-1.22921	-0.0788471	-0.954499	6
OsTN1g000844	-0.169558	-0.490505	-0.0757761	-0.717226	1.98248	-0.529413	4
OsTN1g000848	1.08159	-0.203481	1.27642	-1.24745	-0.143695	-0.763371	6
OsTN1g000849	0.88843	-0.160342	1.40331	-1.27896	-0.0971052	-0.75533	6
OsTN1g000854	0.13774	1.81435	-0.545988	-0.179216	-1.16404	-0.0628484	7
OsTN1g000859	-0.614884	0.950659	0.772173	0.809643	-1.51907	-0.398521	1
OsTN1g000860	-0.0924283	-0.699395	0.000176231	-0.694904	1.95044	-0.46389	4
OsTN1g000866	1.25031	-0.650055	1.21674	-0.758621	-0.0830171	-0.975352	6
OsTN1g000871	1.31134	-0.632112	0.482725	-0.806081	0.805603	-1.16148	8
OsTN1g000881	0.663915	-0.486572	0.43753	-1.27104	1.40051	-0.74435	5
OsTN1g000882	-1.12896	0.888521	-0.823281	1.08027	-0.746882	0.730325	3
OsTN1g000883	0.310182	0.585915	-1.09879	-0.924749	1.52871	-0.401271	4
OsTN1g000898	-0.0643318	1.13772	0.0689833	0.666039	-1.80363	-0.00478119	7
OsTN1g000910	-0.0261551	0.50511	-0.373614	1.24119	-1.71188	0.36535	1
OsTN1g000911	1.14782	-0.318216	-0.525518	1.31892	-1.16395	-0.459061	1
OsTN1g000914	-0.442306	-0.546736	2.00742	-0.546578	-0.0546978	-0.417101	6
OsTN1g000925	1.42535	-0.802783	-0.279123	-0.955167	1.06301	-0.451291	5
OsTN1g000937	-1.0094	0.676756	-0.561313	1.61797	-0.767059	0.0430473	1
OsTN1g000939	-0.843042	0.463663	-0.613029	1.72101	-0.849674	0.121067	1
OsTN1g000944	-0.390996	1.59486	-0.391098	0.436934	-1.39257	0.142875	7
OsTN1g000946	1.21147	-0.848622	0.822594	-0.932277	0.65902	-0.912183	8
OsTN1g000947	-0.301305	-1.14318	0.935561	-1.15164	0.725203	0.935358	5
OsTN1g000949	0.431931	-0.868131	-0.395939	-0.704637	1.8233	-0.28652	4
OsTN1g000951	-0.287012	-0.549561	-0.0337746	-0.533146	1.99506	-0.591567	4
OsTN1g000957	-0.04404	-0.49487	-0.4921	-0.371239	2.00305	-0.600803	4
OsTN1g000968	0.942989	0.274872	-0.624473	1.19089	-1.45571	-0.328568	1
OsTN1g000977	-1.16585	1.12519	-0.478829	0.505344	-0.965041	0.979179	3
OsTN1g000981	-0.307938	-1.48085	0.219464	-0.051876	1.63135	-0.0101514	4
OsTN1g000992	0.259984	0.134884	-1.26469	1.3381	-1.07516	0.606886	3
OsTN1g000998	0.1748	-1.00713	-0.00745555	-1.18923	1.50561	0.523405	4
OsTN1g000999	1.26394	-0.824257	0.720686	-1.01046	0.690353	-0.840268	8
OsTN1g001004	-0.106651	0.601117	-1.39586	1.09979	-0.950564	0.752163	3
OsTN1g001008	0.815654	-0.617346	1.01046	-0.979232	0.87198	-1.10151	8
OsTN1g001009	0.997338	-0.688956	0.866933	-0.95836	0.849931	-1.06689	8
OsTN1g001013	-0.323911	-0.54381	-0.158315	-0.642452	2.01102	-0.342536	4
OsTN1g001017	-0.985329	0.365154	-1.0355	1.24864	-0.565112	0.972143	2
OsTN1g001019	0.875489	-0.701813	0.607507	-1.36764	1.10855	-0.522094	5
OsTN1g001021	-0.77243	1.61883	-0.859907	0.3342	-0.823742	0.50305	7
OsTN1g001026	0.13695	-0.722875	1.89515	-0.696114	0.00534758	-0.618461	6
OsTN1g001035	-0.993809	0.24393	-0.988147	0.142931	-0.120006	1.7151	2
OsTN1g001036	1.82644	-0.919018	0.19694	0.083286	-0.778978	-0.408666	6
OsTN1g001048	1.48306	-0.830151	0.743195	-0.131897	-0.0227953	-1.24142	6
OsTN1g001059	0.342615	-1.09391	0.927205	-0.942006	1.29009	-0.523993	5
OsTN1g001061	1.93695	0.0623933	-0.60321	-0.58361	-0.730113	-0.0824123	6
OsTN1g001063	1.06127	-0.648573	0.153578	-1.07422	1.28996	-0.782013	5
OsTN1g001080	1.12704	-0.725165	1.4174	-0.742592	-0.359679	-0.717001	6
OsTN1g001083	-0.746943	1.29891	-0.500445	1.06746	-1.16733	0.0483489	3
OsTN1g001085	-0.258329	-1.33247	1.37747	-0.69278	0.883129	0.0229779	5
OsTN1g001096	1.01441	0.36428	0.52462	0.598402	-1.4454	-1.05631	6
OsTN1g001100	-0.0402288	-0.353281	0.0702549	-0.925052	1.89572	-0.647417	4
OsTN1g001114	-0.171407	0.564533	-0.88968	1.13306	-1.40775	0.771244	3
OsTN1g001131	0.357861	0.705517	1.37928	-0.427699	-1.3672	-0.647761	6
OsTN1g001132	0.574189	0.05627	0.570725	1.17163	-1.4635	-0.909313	1
OsTN1g001137	1.1132	-0.930409	1.10258	-0.859333	0.438984	-0.865026	8
OsTN1g001142	-0.828566	1.05354	-0.854423	0.837793	-1.03956	0.831214	3
OsTN1g001159	1.27381	-0.891787	0.949092	-0.992762	0.395858	-0.734212	8
OsTN1g001160	-0.065619	-0.435085	0.979993	1.00693	-1.67254	0.186325	1
OsTN1g001191	0.243362	-1.19904	0.94349	-0.823288	1.30827	-0.472796	5
OsTN1g001192	0.245538	-1.19845	0.91321	-0.815249	1.33284	-0.477892	5
OsTN1g001193	0.229099	-1.07863	0.838537	-0.823935	1.43075	-0.595821	5
OsTN1g001195	0.0643854	-0.305272	0.0167953	-0.672575	1.87101	-0.974344	4
OsTN1g001197	-0.687215	0.0987721	-1.38457	-0.274474	1.12424	1.12324	2
OsTN1g001203	0.421742	-0.862905	-0.232515	-0.842353	1.79838	-0.282352	4
OsTN1g001206	0.957432	-0.772891	1.48368	-0.80031	-0.0682163	-0.799694	6
OsTN1g001209	0.269579	-0.658232	-0.366003	-0.727189	1.90997	-0.428128	4
OsTN1g001213	-0.264103	-0.706353	0.415235	-0.61789	1.84929	-0.676182	4
OsTN1g001220	-0.715575	0.501036	-1.10211	0.910002	-0.824172	1.23082	2
OsTN1g001223	0.155098	-1.02776	0.8538	-1.17191	1.33981	-0.149024	5
OsTN1g001228	-1.61396	0.415474	-0.787775	0.712901	0.260544	1.01282	2
OsTN1g001234	-0.587818	0.559998	-1.65546	0.895975	-0.100135	0.887436	2
OsTN1g001235	-0.680136	0.224281	-1.12635	-0.0502661	-0.154189	1.78666	2
OsTN1g001238	-0.815424	0.0178695	-1.21924	1.23756	-0.322094	1.10133	2
OsTN1g001248	1.15298	-0.88212	0.863304	-1.16789	0.642432	-0.608711	8
OsTN1g001260	-0.894474	0.470276	-0.909855	0.773052	-0.814021	1.37502	2
OsTN1g001264	1.34408	-1.07284	0.447486	-0.671977	0.810168	-0.856916	8
OsTN1g001266	0.930867	-0.80699	0.0648005	-1.18371	1.38685	-0.391815	5
OsTN1g001271	-1.34632	0.482315	-1.10065	0.490686	0.280755	1.19322	2
OsTN1g001276	-0.676699	0.594969	-0.912107	1.33102	-1.04257	0.705391	3
OsTN1g001279	0.691416	-0.743684	0.338762	-1.18247	1.46152	-0.565541	5
OsTN1g001286	0.905591	1.27771	0.297191	-1.29049	-0.388121	-0.801882	6
OsTN1g001294	0.228071	-0.658931	0.906675	-0.716667	1.37524	-1.13439	5
OsTN1g001296	1.08316	-0.245253	0.698226	-1.12904	0.776635	-1.18373	8
OsTN1g001302	-1.11939	0.450826	-0.999353	1.22885	-0.465509	0.904572	2
OsTN1g001309	-0.820471	0.392043	-0.967961	1.18777	-0.845328	1.05395	2
OsTN1g001313	0.519454	-0.849217	0.552156	-0.974634	1.48771	-0.735472	5
OsTN1g001314	0.671104	-0.892645	1.03665	-0.94695	1.0074	-0.875556	8
OsTN1g001318	-0.188439	-0.932289	0.573813	-0.91675	1.69477	-0.2311	5
OsTN1g001327	1.17252	-0.109497	0.775169	-1.17425	0.508581	-1.17253	8
OsTN1g001328	-0.286045	-0.806742	-0.65532	-0.469085	1.87014	0.347053	4
OsTN1g001332	0.40581	-0.912468	-0.32875	-0.882863	1.76439	-0.0461183	4
OsTN1g001337	0.144852	-0.680836	-0.2413	-0.776075	1.92744	-0.374082	4
OsTN1g001344	0.54789	-0.432994	0.153381	-1.14753	1.61976	-0.740513	5
OsTN1g001354	-0.6682	0.983796	-0.289567	1.50742	-0.930653	-0.602798	1
OsTN1g001358	-1.01758	0.815979	-0.992207	1.07054	-0.700131	0.823406	3
OsTN1g001364	-0.140462	0.378617	1.70853	-0.340182	-0.297447	-1.30906	6
OsTN1g001368	0.890584	-0.642777	1.4016	-0.626676	0.164467	-1.1872	6
OsTN1g001378	1.64163	-0.419119	0.742793	-0.218584	-0.826698	-0.920023	6
OsTN1g001381	0.668278	-0.992637	0.678899	-1.07264	1.28067	-0.562568	5
OsTN1g001385	-0.716025	-0.831762	-1.13056	0.656356	0.865582	1.15641	2
OsTN1g001388	1.61618	-0.745329	0.826198	-0.716134	-0.211262	-0.769652	6
OsTN1g001391	-0.831932	0.431908	-0.775836	1.63609	-0.83704	0.376806	3
OsTN1g001418	1.87834	-0.335766	0.285719	-0.280647	-0.797064	-0.750585	6
OsTN1g001422	-0.914039	0.479274	-0.913972	1.10713	-0.839552	1.08116	2
OsTN1g001440	1.29372	-0.382432	1.23269	-0.619189	-0.522995	-1.00179	6
OsTN1g001441	-0.283302	-0.631682	-0.207013	-0.60514	2.00816	-0.28102	4
OsTN1g001444	-0.913182	1.04067	-0.789858	0.709666	-1.0122	0.964904	3
OsTN1g001452	-0.741539	0.96014	-0.969169	0.526963	-0.957373	1.18098	2
OsTN1g001453	-0.698911	0.959432	-0.995442	0.480523	-0.953738	1.20814	2
OsTN1g001458	-0.689191	1.62128	-0.878835	0.292671	-0.872475	0.526554	7
OsTN1g001464	-0.380672	-0.607557	-0.399792	-0.582631	1.9965	-0.0258458	4
OsTN1g001472	-0.307898	0.974476	0.434075	0.629825	-1.83302	0.102547	7
OsTN1g001474	0.439942	-0.596371	0.213802	-0.998489	1.68819	-0.747072	5
OsTN1g001477	0.890503	-0.859669	0.617696	-0.900814	1.18518	-0.932899	5
OsTN1g001485	0.64688	-0.468243	1.61381	-1.21076	-0.0430638	-0.538622	6
OsTN1g001486	0.648573	-0.471829	1.61297	-1.20973	-0.0415772	-0.538404	6
OsTN1g001487	1.4468	-1.06297	0.984298	-0.624901	-0.105771	-0.637453	6
OsTN1g001489	0.147779	-0.878084	-0.66446	-0.97608	1.15054	1.22031	4
OsTN1g001511	0.221615	-0.889888	0.757118	-0.90474	1.51121	-0.695311	5
OsTN1g001512	-0.140617	-0.673177	-0.754898	-0.851625	1.59936	0.820957	4
OsTN1g001514	-1.08966	0.521567	-1.20321	0.583238	-0.129496	1.31756	2
OsTN1g001515	-1.06834	0.481146	-1.2087	0.60885	-0.145045	1.33209	2
OsTN1g001518	1.02897	-0.709059	1.21316	-0.910534	0.375702	-0.998238	8
OsTN1g001529	-0.415158	0.388005	-0.101835	1.73863	-1.22221	-0.387432	1
OsTN1g001531	0.36132	-0.0242305	1.81972	-0.783627	-0.669522	-0.703663	6
OsTN1g001545	0.104791	-0.789394	0.170737	-0.783349	1.84896	-0.551747	5
OsTN1g001548	-1.03864	0.778055	-1.06567	0.968882	-0.588652	0.946024	2
OsTN1g001559	-1.02747	0.225417	-0.000475078	1.80232	-0.769473	-0.230313	1
OsTN1g001570	-0.745925	1.63316	-0.75251	0.769909	-0.774954	-0.129675	7
OsTN1g001589	-0.153304	-1.96239	0.502146	0.596588	0.495053	0.521905	5
OsTN1g001598	-0.210038	-0.178667	-0.78526	-0.595851	1.97719	-0.207376	4
OsTN1g001601	-1.25782	0.679882	-1.12932	0.679776	1.10125	-0.0737687	2
OsTN1g001606	-0.3513	-0.388168	-0.51681	1.92175	-0.854407	0.188938	1
OsTN1g001612	-0.700662	0.634786	-0.409935	1.67472	-1.0548	-0.144109	1
OsTN1g001617	-0.620378	0.41575	-0.537147	1.6948	-1.11967	0.166645	1
OsTN1g001618	-1.00491	0.0580625	-0.626754	1.67598	-0.675612	0.573229	3
OsTN1g001621	0.500704	-1.02335	1.41678	-0.923728	0.663294	-0.6337	8
OsTN1g001622	1.00739	-1.44502	0.846001	-0.824763	0.663407	-0.247018	8
OsTN1g001643	1.39431	-0.333697	0.938691	-0.713548	-0.0396958	-1.24606	6
OsTN1g001662	-0.458894	-0.67886	-0.917509	-0.491959	1.257	1.29022	4
OsTN1g001670	1.64486	-0.528594	0.718916	-0.380158	-0.343372	-1.11165	6
OsTN1g001675	1.62522	-0.845408	0.84645	-0.712064	-0.421445	-0.492756	6
OsTN1g001683	1.47271	-0.467433	0.327725	-1.0509	0.683883	-0.965988	8
OsTN1g001691	-0.771153	1.57238	-0.904938	0.0576251	-0.721823	0.767911	7
OsTN1g001697	-0.560731	-0.167186	-1.08341	1.60498	-0.562645	0.768992	2
OsTN1g001698	0.314967	-1.05515	0.314614	-1.14962	1.53801	0.0371827	5
OsTN1g001712	1.46676	-0.646312	0.930301	-0.710749	-0.0103503	-1.02965	6
OsTN1g001723	-0.890913	0.196418	-0.84472	1.56461	-0.721857	0.696462	3
OsTN1g001744	-0.0431109	0.660105	0.305328	1.09366	-1.79571	-0.220268	1
OsTN1g001745	-1.05865	0.886486	-0.658442	1.27598	-0.905529	0.460165	3
OsTN1g001747	-0.429067	-0.669815	1.98645	-0.620945	-0.125198	-0.141429	6
OsTN1g001749	1.16663	-0.681484	1.23527	-0.797871	0.0802677	-1.00281	6
OsTN1g001750	-0.952859	-0.0181884	-0.715522	1.19881	-0.762018	1.24977	2
OsTN1g001766	0.0626564	0.635344	-1.04677	0.811036	-1.39991	0.937639	3
OsTN1g001777	-0.474496	-0.550884	1.90422	0.333058	-0.611879	-0.600015	6
OsTN1g001793	-0.878499	0.293381	-0.853296	1.65067	-0.683542	0.471286	3
OsTN1g001796	0.262405	0.30737	0.14258	1.51442	-1.26103	-0.965745	1
OsTN1g001808	0.104689	-1.03354	1.16428	-1.03752	1.16497	-0.362885	5
OsTN1g001812	-0.90924	0.480473	-0.589255	1.57477	-0.971314	0.41457	3
OsTN1g001837	1.09022	-0.741228	1.12901	-0.878477	0.419925	-1.01945	8
OsTN1g001854	-1.30661	0.403048	-1.12067	0.849006	0.106453	1.06877	2
OsTN1g001864	0.218765	-0.995935	1.62417	-1.0046	0.466532	-0.308935	8
OsTN1g001865	0.353504	-0.570657	1.4107	-1.17739	0.757731	-0.773889	8
OsTN1g001867	0.468132	-1.34339	1.13779	-1.11919	0.60454	0.252114	5
OsTN1g001871	-0.395125	0.905934	-0.552283	1.48714	-1.20324	-0.242432	1
OsTN1g001890	-1.24037	0.619022	-1.24632	1.06785	0.219895	0.579926	2
OsTN1g001891	-0.0181447	0.443833	-1.22225	1.30992	-1.11141	0.59805	3
OsTN1g001911	-0.457436	-0.614955	0.285536	-0.612008	1.9197	-0.520832	4
OsTN1g001913	-0.759381	0.86864	-1.03228	1.10359	-0.917624	0.737062	3
OsTN1g001936	-0.245404	0.647933	-0.88663	1.14972	-1.37934	0.713725	3
OsTN1g001942	1.03523	-0.805202	0.481496	-1.03056	1.14317	-0.824143	5
OsTN1g001983	0.124532	1.87655	-0.561163	-0.696205	-0.81169	0.0679796	7
OsTN1g001987	1.04023	-0.898843	0.195597	-1.02927	1.28761	-0.595328	5
OsTN1g001989	0.261023	-0.955847	-0.707029	-0.914047	1.18198	1.13392	4
OsTN1g001990	1.47803	-0.922512	-0.153854	-0.864837	0.968312	-0.505137	8
OsTN1g002009	-0.112364	2.01688	-0.50377	-0.540833	-0.472239	-0.387671	7
OsTN1g002011	0.817946	-1.6588	-0.032057	-0.0229534	-0.319043	1.21491	6
OsTN1g002028	-0.803355	-0.352008	-0.105267	-0.396511	1.98817	-0.331031	4
OsTN1g002029	-0.936846	-0.355434	-0.440092	-0.101182	1.94418	-0.110624	4
OsTN1g002030	-0.994054	-0.335568	-0.528254	0.0544865	1.89947	-0.0960827	4
OsTN1g002052	-1.11447	0.905845	-1.07333	1.0127	-0.466847	0.7361	3
OsTN1g002053	0.874476	-0.736755	1.38002	0.292125	-0.724796	-1.08507	6
OsTN1g002056	-0.508935	-0.666415	-0.33506	-0.719434	0.346507	1.88334	2
OsTN1g002063	0.0284997	-0.688398	-0.35031	-0.681268	1.96554	-0.274063	4
OsTN1g002080	-0.430255	-0.581402	-0.162011	-0.456794	2.02203	-0.391571	4
OsTN1g002085	1.39242	-0.715091	1.10569	-0.79266	-0.172291	-0.818075	6
OsTN1g002101	-0.518177	1.7593	-0.623761	-0.632874	-0.642871	0.658385	7
OsTN1g002104	-0.312527	1.28591	0.985479	0.130669	-1.24155	-0.847978	7
OsTN1g002109	0.692164	0.577309	-1.08353	-0.364858	1.28622	-1.1073	4
OsTN1g002112	1.36261	-0.412322	1.13767	-0.979676	-0.324905	-0.783373	6
OsTN1g002118	1.65181	-0.242351	0.530725	-0.24153	-1.31305	-0.385596	6
OsTN1g002123	1.96478	-0.603048	-0.0152819	-0.603362	-0.111151	-0.631936	6
OsTN1g002124	1.95788	-0.648134	-0.10722	-0.573168	0.00824556	-0.637604	6
OsTN1g002125	1.95617	-0.669322	-0.185247	-0.532605	0.0658804	-0.63488	8
OsTN1g002129	0.699276	0.84027	-0.338534	1.02093	-1.41061	-0.811331	1
OsTN1g002136	1.40468	-1.01173	0.910019	-0.797442	0.200797	-0.706329	8
OsTN1g002158	-0.891408	1.09625	-0.930554	0.946666	-0.890577	0.669622	3
OsTN1g002163	-1.21074	0.768224	-0.985961	0.806954	-0.440072	1.06159	2
OsTN1g002164	-0.927206	1.56362	-0.476996	0.195845	-1.00419	0.648932	7
OsTN1g002169	-0.207044	-1.08698	1.74239	-0.688551	-0.223965	0.464152	6
OsTN1g002179	0.577319	-0.703202	0.37372	-1.28104	1.48038	-0.447169	5
OsTN1g002190	-0.697821	0.915477	-0.927578	1.09062	-1.07144	0.690738	3
OsTN1g002198	0.269405	-1.05208	0.533695	-1.21055	1.43869	0.0208461	5
OsTN1g002203	0.800608	-0.754388	1.60539	-0.853786	-0.111289	-0.686532	6
OsTN1g002216	-0.109069	-0.573822	-0.217276	-0.590387	2.0007	-0.510149	4
OsTN1g002220	-0.980369	1.59448	0.0287202	-1.15563	0.136523	0.376276	7
OsTN1g002223	0.333406	-0.0780269	0.715824	-1.7249	1.12218	-0.368491	5
OsTN1g002226	-0.733648	0.708646	-0.728531	-0.199838	-0.734601	1.68797	2
OsTN1g002238	0.446256	-0.94134	1.46378	-0.878656	0.660674	-0.750711	8
OsTN1g002244	-0.399148	0.527577	0.870551	-0.378568	-1.62716	1.00674	7
OsTN1g002246	-0.573793	0.540557	-1.18436	0.975798	-0.877708	1.11951	2
OsTN1g002248	0.321266	-1.00041	1.50357	-0.818579	0.691748	-0.697604	8
OsTN1g002250	0.922031	-0.520718	0.858138	-1.07743	0.900173	-1.08219	8
OsTN1g002252	0.561768	-0.807298	1.36385	-1.29455	0.578622	-0.40239	8
OsTN1g002267	0.977987	-1.49806	-0.786812	0.814847	0.690568	-0.198525	5
OsTN1g002271	-0.787366	0.966561	-0.569342	1.48199	-0.951704	-0.140136	1
OsTN1g002272	0.369625	-0.526864	-0.983309	-1.04865	1.34253	0.846661	4
OsTN1g002279	0.313339	-0.400278	-1.00049	-0.777205	1.76842	0.0962089	4
OsTN1g002280	-0.650857	1.30314	-0.673382	1.24002	-0.877985	-0.340943	1
OsTN1g002283	1.2214	-0.847707	0.920274	-1.24502	0.417906	-0.466846	8
OsTN1g002288	-0.281833	-0.599378	0.179485	-1.00716	1.868	-0.159112	4
OsTN1g002292	1.47351	-0.713464	1.03212	-0.748852	-0.248289	-0.795019	6
OsTN1g002302	1.20252	-0.821109	0.337988	-0.662775	1.0498	-1.10642	8
OsTN1g002309	1.77345	-0.329563	0.579997	-0.795339	-0.507843	-0.720699	6
OsTN1g002328	-0.869775	0.830674	-0.843908	1.34804	-0.909256	0.444225	3
OsTN1g002333	0.130502	-0.746943	0.107866	-0.699897	1.86783	-0.659359	4
OsTN1g002347	-0.275376	-0.446615	-0.444604	-0.463173	2.03645	-0.40668	4
OsTN1g002348	-0.349077	0.846812	-1.16617	1.18527	-1.05299	0.536154	3
OsTN1g002349	-0.516062	0.93422	-0.931526	1.30261	-1.09638	0.307134	3
OsTN1g002359	-0.00462111	-0.54641	-0.0901082	-0.876078	1.93649	-0.419273	4
OsTN1g002362	0.652892	-0.890747	1.04745	-1.14841	0.977778	-0.638961	5
OsTN1g002365	0.87835	-0.785273	1.1728	-1.07249	0.633868	-0.827261	8
OsTN1g002387	-0.392098	-0.247126	-0.368925	2.03043	-0.55527	-0.467013	1
OsTN1g002388	-0.517386	-0.0383577	-0.579793	1.98531	-0.639535	-0.210242	1
OsTN1g002389	-0.516746	0.282196	0.476701	1.44896	-1.51514	-0.175978	1
OsTN1g002392	-0.229796	-0.565193	-0.140539	-0.571065	2.00768	-0.50109	4
OsTN1g002400	-0.54676	-0.158489	0.0954125	1.94311	-0.700779	-0.632497	1
OsTN1g002403	-0.817475	1.30097	-0.767771	1.12773	-0.881221	0.0377718	3
OsTN1g002411	-0.0234708	-0.57501	1.39428	-1.07779	1.01375	-0.731756	5
OsTN1g002422	0.421625	0.68745	0.476528	0.866919	-1.65263	-0.79989	1
OsTN1g002426	-0.515036	-0.665969	-1.10527	-0.174074	1.15069	1.30966	4
OsTN1g002428	1.3334	-0.365409	1.08097	-0.513734	-0.278924	-1.2563	6
OsTN1g002431	-0.775369	0.501033	-1.46509	1.39322	0.160988	0.185216	3
OsTN1g002443	-0.682189	1.28934	-0.488715	1.28324	-0.747486	-0.654184	1
OsTN1g002451	0.0439446	-0.75163	0.336793	-0.795694	1.80928	-0.642697	5
OsTN1g002457	-1.10169	0.400093	-0.851064	1.64824	-0.348334	0.252756	3
OsTN1g002459	-0.797127	0.328154	-1.09518	0.952229	-0.684879	1.2968	2
OsTN1g002462	-1.13349	0.792962	-1.14362	0.684718	-0.3039	1.10333	2
OsTN1g002463	-1.07759	0.708722	-1.10501	0.723689	-0.434337	1.18452	2
OsTN1g002467	-0.321253	-0.325373	-0.576184	0.0327945	1.96428	-0.774262	4
OsTN1g002468	1.19959	-0.785454	0.744272	-1.11265	0.735767	-0.78152	8
OsTN1g002476	-0.913119	-0.20265	-1.11207	-0.153511	1.31204	1.06932	4
OsTN1g002482	1.22611	-0.807741	1.00177	-0.961492	0.407475	-0.86612	8
OsTN1g002483	0.199305	-0.600155	-0.268933	-0.899328	1.89989	-0.330775	4
OsTN1g002488	-1.09295	1.01493	-0.843553	0.647501	-0.759337	1.03341	3
OsTN1g002492	-0.972396	1.12178	-0.86354	1.15906	-0.773798	0.328894	3
OsTN1g002507	0.0267663	-0.828152	0.157085	-0.847505	1.85445	-0.362647	4
OsTN1g002508	0.396648	-0.580376	1.60007	-1.08805	0.430783	-0.75907	8
OsTN1g002516	-0.178576	-0.390063	2.00878	-0.618886	-0.236659	-0.584594	6
OsTN1g002523	-0.936907	0.669961	-0.9164	1.41057	-0.753157	0.525928	3
OsTN1g002526	1.04693	-0.293315	1.16689	-0.611011	0.12806	-1.43755	6
OsTN1g002536	1.27552	-0.930971	0.779281	-0.940062	0.614682	-0.798448	8
OsTN1g002538	-0.253983	0.331535	-0.265501	-0.914662	1.83789	-0.73528	4
OsTN1g002541	-0.29176	-0.646503	9.6298124932966e-05	-0.641915	1.98095	-0.400867	4
OsTN1g002563	-1.06736	0.160966	-0.9503	1.31349	-0.456062	0.999265	2
OsTN1g002566	0.213933	-0.789764	0.551134	-0.67922	1.63992	-0.935999	5
OsTN1g002567	0.0824562	-0.555579	-0.203728	-0.679922	1.95516	-0.598389	4
OsTN1g002577	0.703445	0.245117	-0.147579	-1.18362	1.40564	-1.023	5
OsTN1g002578	-1.08697	0.289737	-1.06967	1.03816	-0.350212	1.17895	2
OsTN1g002583	1.41012	-0.690985	1.09559	-0.670207	-0.23342	-0.911103	6
OsTN1g002587	0.295044	-0.580593	-0.535765	-0.740144	1.90366	-0.342197	4
OsTN1g002606	-0.23715	-0.656658	0.0590532	-0.607807	1.9661	-0.523539	4
OsTN1g002611	0.151898	-0.633572	-0.350112	-0.625066	1.95338	-0.496528	4
OsTN1g002612	1.15815	-0.0842669	0.545299	-0.970064	0.724857	-1.37397	8
OsTN1g002616	-0.753794	0.422419	-0.692194	1.42046	-1.11435	0.717451	3
OsTN1g002619	1.3907	-0.728879	0.971994	-0.830343	0.135687	-0.939162	8
OsTN1g002624	-0.370899	1.59821	-0.650169	-0.15762	-1.15119	0.731671	7
OsTN1g002634	1.44861	-0.151237	0.091085	-0.696197	0.689748	-1.382	8
OsTN1g002636	0.0365688	1.06257	0.411356	0.852874	-1.4819	-0.881463	1
OsTN1g002638	0.14633	1.0109	0.46383	0.807315	-1.47995	-0.948429	1
OsTN1g002640	-1.06443	0.443284	-1.18163	0.984797	-0.287382	1.10536	2
OsTN1g002644	0.975752	-0.790807	-0.159843	-0.833616	1.49403	-0.685519	5
OsTN1g002647	0.888719	-0.506564	0.936572	-1.56151	0.67303	-0.430242	8
OsTN1g002648	-0.203875	-0.559374	-0.314342	-0.563182	2.02111	-0.380339	4
OsTN1g002649	-0.142023	-0.673153	-0.154378	-0.691251	1.9806	-0.319792	4
OsTN1g002653	0.00767962	-0.928991	0.290836	-0.915059	1.77792	-0.232384	5
OsTN1g002656	-0.448071	-0.608889	-0.597679	-0.543131	1.92386	0.273907	4
OsTN1g002667	-0.660051	-0.635961	0.533289	-0.683238	-0.36405	1.81001	2
OsTN1g002680	-0.654154	1.21416	-0.848388	0.624061	-1.15078	0.815098	3
OsTN1g002681	1.6336	-0.29647	0.799217	-0.606164	-0.582701	-0.947484	6
OsTN1g002691	0.229667	-0.749004	-0.0953529	-0.735675	1.88435	-0.53399	4
OsTN1g002697	0.0543803	-1.03163	0.649169	-0.0235492	1.48901	-1.13738	5
OsTN1g002700	-1.05929	0.622091	-0.963596	0.995346	-0.660259	1.06571	2
OsTN1g002714	-0.261093	-0.515595	-0.289706	-0.520058	2.02878	-0.442327	4
OsTN1g002721	0.0857402	-0.845856	-0.651207	-0.814023	1.71033	0.515014	4
OsTN1g002732	-0.877349	1.73242	-0.639938	0.346503	-0.801244	0.239611	7
OsTN1g002741	1.35881	-0.809127	0.716244	-0.909119	0.561796	-0.918604	8
OsTN1g002742	1.53555	-0.78773	0.623547	-0.849579	0.361544	-0.883329	8
OsTN1g002752	-0.44992	1.89834	-0.554827	0.184999	-0.906802	-0.171794	7
OsTN1g002753	-0.460825	1.61284	-0.0173248	0.259702	0.0599388	-1.45433	7
OsTN1g002755	-0.668916	1.77022	-0.787031	0.567892	-0.650656	-0.231511	7
OsTN1g002762	-0.61909	0.520145	-1.47562	1.35375	-0.284365	0.505188	3
OsTN1g002765	-0.890368	0.961989	-0.88003	1.08464	-0.942096	0.665864	3
OsTN1g002766	-0.917391	0.567564	-1.42661	1.21435	-0.00914453	0.571235	2
OsTN1g002769	-0.0321427	-0.860083	0.681777	-0.962904	1.63043	-0.457077	5
OsTN1g002771	0.180102	-0.553867	0.668682	-1.11438	1.55779	-0.738323	5
OsTN1g002775	1.4493	-0.844664	0.255212	-0.958488	0.82307	-0.72443	8
OsTN1g002783	-1.04244	0.462743	-1.01978	0.823861	-0.528622	1.30424	2
OsTN1g002790	-1.10413	0.584541	-1.07765	0.780081	-0.408582	1.22573	2
OsTN1g002794	1.32978	-0.765656	0.60034	-1.04167	0.710755	-0.833546	8
OsTN1g002806	-0.552655	0.446245	-0.676751	1.81762	-0.832382	-0.202079	1
OsTN1g002807	0.405752	-0.76789	0.23548	-1.19066	1.6346	-0.317282	5
OsTN1g002811	-0.378735	0.0395908	-0.646646	-0.552618	1.98331	-0.444902	4
OsTN1g002812	0.895768	-0.897797	0.965783	-0.509199	0.796497	-1.25105	8
OsTN1g002816	-0.553055	1.21604	-0.823668	1.17778	-1.07092	0.0538142	3
OsTN1g002825	-1.10752	0.0881672	-0.786131	0.731669	-0.471985	1.5458	2
OsTN1g002826	-0.672803	-0.0384772	-0.502894	-0.123467	1.96941	-0.63177	4
OsTN1g002831	-0.503416	0.736691	-0.573002	1.37785	-1.36706	0.328931	3
OsTN1g002832	0.46636	0.488886	-0.93492	0.569467	-1.5541	0.96431	3
OsTN1g002833	0.310396	-1.26447	1.69788	-0.423811	-0.469161	0.149161	6
OsTN1g002838	-0.261983	-0.797186	-0.157056	-0.856732	1.86973	0.203223	4
OsTN1g002841	-0.525381	-0.556026	-0.0766841	-0.482545	2.00991	-0.36927	4
OsTN1g002843	-0.588871	-0.634007	-0.575394	-0.636368	1.74243	0.692208	4
OsTN1g002845	-0.703657	-0.568459	-0.706259	-0.579861	1.08625	1.47199	4
OsTN1g002846	-0.736506	-0.699256	-1.00983	0.0179999	1.18286	1.24474	4
OsTN1g002850	-0.634157	1.38496	-0.713193	1.13157	-0.906415	-0.262765	7
OsTN1g002855	-0.393566	-0.409876	-0.337316	-0.476801	2.03917	-0.421614	4
OsTN1g002856	1.52394	-0.859288	0.493449	-0.864486	0.525986	-0.8196	8
OsTN1g002857	1.07657	-0.772872	0.84349	-0.846762	0.790549	-1.09097	8
OsTN1g002866	-0.872137	0.369075	-0.911201	1.01605	-0.840419	1.23864	2
OsTN1g002890	0.806012	-1.00237	0.299875	-1.09573	1.38008	-0.387868	5
OsTN1g002893	-0.895421	-0.15599	1.67233	0.623901	-0.948866	-0.295957	1
OsTN1g002906	-0.785939	0.898013	-0.777418	1.4657	-0.901644	0.10129	3
OsTN1g002921	-0.989683	-0.564951	-0.916882	1.09154	0.0912151	1.28876	2
OsTN1g002928	0.141356	-0.68571	0.675834	-0.828724	1.59826	-0.90102	5
OsTN1g002929	-0.918999	-0.488857	-0.534477	1.86492	-0.23505	0.312467	1
OsTN1g002932	1.38266	-0.736653	0.984427	-0.466817	0.00196663	-1.16558	6
OsTN1g002933	1.86989	-0.626765	0.136739	-0.740518	0.0921822	-0.731524	8
OsTN1g002935	-0.870781	0.619002	-0.864705	1.06979	-0.967946	1.01464	3
OsTN1g002941	0.638984	-0.922107	1.22201	-0.788742	0.823464	-0.973607	8
OsTN1g002943	1.15538	-0.714669	1.15653	-0.99759	0.266661	-0.86631	8
OsTN1g002950	0.0494709	1.80895	-0.675215	0.131507	-1.0977	-0.217014	7
OsTN1g002953	0.81812	-0.636959	1.37827	-0.953307	0.37989	-0.986014	8
OsTN1g002954	1.82599	-0.676378	0.419646	-0.718909	-0.147874	-0.702476	6
OsTN1g002959	-0.413835	0.717352	-0.311506	1.63948	-1.13065	-0.500844	1
OsTN1g002960	-0.756388	-0.169667	-0.761085	0.830943	-0.74724	1.60344	2
OsTN1g002972	1.73028	-0.517922	0.628859	-0.719796	-0.248049	-0.873373	6
OsTN1g002980	-0.298299	-0.496106	2.03236	-0.536345	-0.368241	-0.333371	6
OsTN1g002983	1.3384	-0.304835	1.18398	-0.657586	-0.599993	-0.959967	6
OsTN1g002992	1.67783	-0.743589	0.157547	-0.905378	0.5273	-0.713711	8
OsTN1g002995	1.63684	-0.797007	0.726321	-0.797851	-0.0477962	-0.72051	6
OsTN1g002998	0.983587	-0.606764	1.31453	-1.33123	0.0428677	-0.402984	8
OsTN1g003004	1.30571	-0.13156	1.17047	-0.677101	-1.00555	-0.661974	6
OsTN1g003008	-0.531663	0.568942	-1.12851	1.47808	-0.849373	0.462527	3
OsTN1g003013	1.16913	-0.860758	0.624887	-0.799907	0.895879	-1.02923	8
OsTN1g003014	1.14863	-0.864354	0.60807	-0.809034	0.934502	-1.01782	8
OsTN1g003015	1.0342	-0.87985	0.550912	-0.759428	1.09352	-1.03936	8
OsTN1g003018	1.71479	-0.0098449	-0.0959987	-1.16842	0.32192	-0.762454	8
OsTN1g003020	-1.01623	0.627562	-1.03957	1.19135	-0.604523	0.841413	3
OsTN1g003024	1.17411	-0.680138	1.03868	-0.992082	0.418798	-0.959371	8
OsTN1g003035	1.68681	-0.797797	0.599181	-0.691893	0.028109	-0.824413	6
OsTN1g003054	-0.596258	-0.317663	2.02759	-0.258718	-0.433058	-0.421888	6
OsTN1g003055	-0.590807	-0.336854	2.02926	-0.267135	-0.422716	-0.411748	6
OsTN1g003063	0.00412509	-0.738668	-0.287127	-0.733276	1.94852	-0.193578	4
OsTN1g003071	-0.584295	-0.741235	-0.860857	-0.164132	1.71317	0.637353	4
OsTN1g003082	1.0263	-0.986938	0.553262	-1.16735	1.04192	-0.467192	5
OsTN1g003088	-0.0922303	-1.29431	1.00227	-0.924465	1.2024	0.106342	5
OsTN1g003089	-0.0801037	-1.25615	0.69825	-0.948796	1.41346	0.173338	5
OsTN1g003091	1.28255	-0.927609	0.816542	-1.00972	0.549688	-0.711449	8
OsTN1g003094	1.15463	-0.460982	0.469389	-1.04341	0.974145	-1.09377	8
OsTN1g003099	1.18799	0.96813	-0.393121	0.379222	-1.24211	-0.900117	7
OsTN1g003100	-0.519638	0.530847	-0.118866	-1.63894	1.20693	0.539663	4
OsTN1g003101	-0.42885	0.793595	-0.872701	0.454208	-1.24138	1.29513	3
OsTN1g003113	-0.37279	-0.281488	0.449188	1.81038	-0.886555	-0.718732	1
OsTN1g003115	-1.00701	0.718735	-1.05248	1.12473	-0.624544	0.840567	3
OsTN1g003116	1.58661	-0.0441622	0.781783	-0.970915	-0.602073	-0.751242	6
OsTN1g003125	-0.681942	-0.785608	1.23871	-0.853728	1.27222	-0.189656	5
OsTN1g003128	1.10704	-0.710537	0.990301	-0.886185	0.579838	-1.08045	8
OsTN1g003143	0.707971	-0.863479	-1.05081	-0.741534	1.29176	0.6561	4
OsTN1g003148	-0.708355	1.32007	-1.06629	0.78422	-0.853789	0.524142	3
OsTN1g003152	-1.16011	0.405025	-1.03449	1.15012	-0.348372	0.987827	2
OsTN1g003157	-0.995413	0.660756	-1.14297	1.3648	-0.389183	0.502013	3
OsTN1g003158	-0.994826	0.666932	-1.1396	1.36593	-0.394138	0.495706	3
OsTN1g003160	-0.857804	1.47991	-0.985319	0.715074	-0.690687	0.338825	3
OsTN1g003162	1.08427	-0.469111	0.500292	-1.20063	1.01954	-0.934365	8
OsTN1g003164	-0.149658	-0.482041	1.05353	1.38592	-0.703171	-1.10458	1
OsTN1g003175	-0.734743	-0.310172	-0.689075	0.804518	-0.720572	1.65004	2
OsTN1g003177	0.103502	-0.775313	0.37778	-0.598694	1.76707	-0.874346	5
OsTN1g003181	1.39023	-0.626472	0.904799	-0.810707	0.215651	-1.0735	8
OsTN1g003185	-0.503814	1.32414	-0.878567	1.23553	-0.615388	-0.561895	7
OsTN1g003192	0.777539	-0.854719	0.60174	-1.08295	1.2727	-0.714309	5
OsTN1g003193	0.827794	-0.833909	0.496718	-1.1647	1.2828	-0.608709	5
OsTN1g003201	-0.18881	0.307177	-0.942559	1.12463	-1.306	1.00556	3
OsTN1g003204	-0.215297	-0.621271	-0.000900247	-0.630225	1.97752	-0.509822	4
OsTN1g003215	-0.821529	1.14105	-1.11247	0.766108	-0.760601	0.787444	3
OsTN1g003223	-0.417349	-0.774999	0.399739	-0.810945	1.83185	-0.228292	4
OsTN1g003226	-0.101529	-0.634849	-0.285332	-0.666992	1.99207	-0.303365	4
OsTN1g003231	-1.03445	0.127032	-0.982214	0.914579	-0.417246	1.3923	2
OsTN1g003234	-0.806775	0.919179	-0.784884	1.27494	-1.03649	0.434032	3
OsTN1g003235	-0.695334	1.02409	1.33947	0.0751109	-1.14396	-0.599381	7
OsTN1g003242	0.208726	-0.933647	1.67066	-1.12535	0.164249	0.0153548	8
OsTN1g003245	-0.387496	-0.589169	-0.283817	-0.603299	2.00924	-0.145459	4
OsTN1g003247	0.191833	-0.920966	1.1218	-0.768592	1.23562	-0.8597	5
OsTN1g003257	-1.12471	0.170625	-1.13046	0.805239	-0.0536281	1.33293	2
OsTN1g003259	-0.29954	-0.537613	-0.165236	-0.534149	2.0189	-0.482362	4
OsTN1g003263	-1.19496	-0.134344	-0.0211414	1.44282	-0.902806	0.810427	3
OsTN1g003266	-0.962944	0.464024	-0.887926	1.62829	-0.561482	0.320039	3
OsTN1g003281	-0.0517236	-1.87944	0.786569	0.829197	0.391187	-0.0757909	5
OsTN1g003283	-0.219269	-0.80017	0.111613	-0.819035	1.8972	-0.170337	4
OsTN1g003287	0.230812	-0.801984	0.180786	-0.844101	1.79969	-0.565207	5
OsTN1g003299	0.391438	-0.90091	1.56821	-0.852616	0.540234	-0.746356	8
OsTN1g003303	-0.891371	0.679191	-0.938345	1.02943	-0.887241	1.00834	3
OsTN1g003306	1.28975	-0.403352	0.35164	-0.995305	0.886133	-1.12887	8
OsTN1g003316	0.0425871	-0.848303	-0.572206	-0.88599	1.68128	0.582628	4
OsTN1g003319	-0.429956	-0.488096	-0.201548	-0.494907	2.02955	-0.415045	4
OsTN1g003322	-0.409439	-0.523509	-0.112867	-0.518547	2.01771	-0.453346	4
OsTN1g003329	0.178379	-0.895282	0.31252	-0.849794	1.75854	-0.50436	5
OsTN1g003331	-0.816715	0.086209	-1.31806	0.207564	0.26838	1.57262	2
OsTN1g003332	-0.875862	0.1501	-1.09883	0.536963	-0.327153	1.61479	2
OsTN1g003333	0.252197	0.479981	-0.22293	1.57567	-1.0502	-1.03473	1
OsTN1g003346	1.24559	-1.0056	1.07343	-0.362619	-1.06765	0.116849	6
OsTN1g003347	-0.251355	-0.167274	-0.509421	0.505575	-1.25581	1.67829	2
OsTN1g003352	-0.276153	-1.09789	0.549798	-0.0558132	1.67002	-0.789961	5
OsTN1g003358	1.0762	-0.386548	0.641274	-1.27077	0.88219	-0.942347	8
OsTN1g003362	0.594194	-0.0623824	0.487281	-1.97764	0.346783	0.611769	5
OsTN1g003371	0.365065	0.743853	-0.686672	1.10106	-1.61878	0.0954763	1
OsTN1g003377	0.62919	-0.684805	0.893816	-0.64582	1.10811	-1.30049	8
OsTN1g003381	1.19276	0.191942	0.499691	0.556133	-1.17881	-1.26171	6
OsTN1g003382	0.292295	-0.288563	-1.45585	-0.136499	1.64027	-0.0516496	4
OsTN1g003384	-1.42535	0.116971	-0.682886	1.32615	-0.171669	0.836785	2
OsTN1g003387	-0.150309	0.917386	-1.05661	1.36335	-1.07733	0.00351078	3
OsTN1g003388	-0.934703	0.774333	-0.976459	1.01004	-0.815538	0.942324	3
OsTN1g003389	-0.945631	0.796619	-0.957807	1.06891	-0.820837	0.858748	3
OsTN1g003409	0.60667	-1.14633	1.2159	-0.19642	0.678175	-1.158	8
OsTN1g003416	-0.369926	-0.55702	-0.200662	-0.55324	2.02235	-0.341508	4
OsTN1g003417	-1.30622	0.321423	-1.21335	0.728425	0.966831	0.502889	2
OsTN1g003422	-1.27688	1.21684	-1.039	0.646934	-0.153838	0.605943	3
OsTN1g003424	-0.0743469	0.277551	-1.16045	1.17416	-1.14976	0.932842	3
OsTN1g003425	1.13922	-0.349634	0.845248	-0.227977	0.251532	-1.65839	6
OsTN1g003439	-0.597924	-0.580015	-0.812435	-0.254669	1.85089	0.394148	4
OsTN1g003452	1.30402	-0.671546	0.895839	-0.893157	0.40582	-1.04097	8
OsTN1g003455	1.69842	-0.50208	0.118546	0.317218	-1.27251	-0.359601	6
OsTN1g003462	-0.524914	0.722032	-1.10519	1.56869	-0.719336	0.0587136	3
OsTN1g003471	-0.931486	0.622096	-0.56736	1.61234	-0.893747	0.158159	1
OsTN1g003477	-0.722624	0.95492	-0.659642	1.43904	-1.02941	0.0177172	3
OsTN1g003481	0.867929	-0.960159	0.337646	-1.20557	1.2852	-0.325049	5
OsTN1g003483	-1.00524	0.706072	-0.905411	-0.00877125	-0.376943	1.59029	2
OsTN1g003491	-1.101	0.358803	-0.816506	1.57975	-0.508794	0.487753	3
OsTN1g003503	-0.725839	-0.135739	-1.15829	0.595326	-0.221551	1.64609	2
OsTN1g003504	-0.288018	1.22963	-0.737963	1.23905	-1.09853	-0.344174	1
OsTN1g003516	-0.301188	0.789419	-0.940368	1.05601	-1.32769	0.723817	3
OsTN1g003518	-0.369104	-0.49623	-0.239561	-0.511263	2.03134	-0.415186	4
OsTN1g003522	-0.677751	-0.579969	-0.494608	-0.310673	0.100064	1.96294	2
OsTN1g003523	1.65272	-0.767854	0.623635	0.0417058	-0.566904	-0.983302	6
OsTN1g003528	-0.147997	1.75941	0.231848	0.0654019	-0.91524	-0.993422	7
OsTN1g003532	-0.923555	1.88184	-0.371051	0.016932	-0.67973	0.0755588	7
OsTN1g003535	0.942638	0.712975	-0.509556	0.17237	-1.76479	0.446367	7
OsTN1g003537	-0.579218	0.572604	-0.977881	1.52018	-0.94827	0.412587	3
OsTN1g003540	-0.702688	0.559795	-0.982881	1.14729	-0.988075	0.966555	3
OsTN1g003541	-0.589491	0.499008	-1.02538	1.07717	-1.02733	1.06602	3
OsTN1g003543	0.438793	-0.186176	-0.437674	1.80544	-0.876563	-0.74382	1
OsTN1g003546	-0.191272	2.00233	-0.569535	-0.54327	-0.562205	-0.136045	7
OsTN1g003547	0.159036	1.7495	0.0863843	-1.25964	-0.210362	-0.524927	7
OsTN1g003549	0.546923	-0.748866	1.53633	-1.33055	0.0666811	-0.0705142	8
OsTN1g003551	0.880399	0.826601	0.926781	-0.497496	-0.79124	-1.34504	6
OsTN1g003557	-0.455332	2.02824	-0.221429	-0.5331	-0.482793	-0.335583	7
OsTN1g003570	0.844414	-1.07858	0.665354	-1.20834	1.06639	-0.289231	5
OsTN1g003571	0.790755	-1.08882	0.749617	-1.21468	1.03754	-0.274414	5
OsTN1g003577	-0.811922	0.690551	-0.439356	1.65868	-0.947052	-0.150899	1
OsTN1g003580	-0.0821951	-0.522288	-0.0142195	-0.717727	1.95509	-0.618662	4
OsTN1g003581	0.364252	-0.762528	1.15156	-1.02884	1.103	-0.827445	5
OsTN1g003590	0.124319	-0.717933	1.24575	-1.16314	1.10219	-0.591192	5
OsTN1g003592	1.56449	-0.164011	0.789082	-1.18054	-0.510278	-0.498749	6
OsTN1g003600	-0.861175	0.885837	-0.728477	1.41515	-0.941905	0.230573	3
OsTN1g003602	-0.313955	-0.509418	-0.457108	-0.408386	2.03608	-0.347218	4
OsTN1g003608	-0.787238	0.407092	-0.188216	1.79932	-0.918733	-0.312224	1
OsTN1g003611	-0.106142	-0.14102	-0.412453	1.93517	-0.984429	-0.291125	1
OsTN1g003614	-1.04805	0.0721412	-1.20782	0.695911	0.0933362	1.39448	2
OsTN1g003615	-1.13868	0.254787	-1.28293	0.423621	0.48838	1.25483	2
OsTN1g003620	-0.322758	-0.569572	-0.30809	-0.662422	2.00441	-0.141566	4
OsTN1g003623	-0.309138	-0.747831	-0.208065	-0.374905	2.0067	-0.366757	4
OsTN1g003630	-1.19469	0.237696	-0.973767	0.667628	-0.182228	1.44536	2
OsTN1g003632	-1.16574	0.816877	-1.0917	0.96968	-0.369042	0.839927	2
OsTN1g003643	-1.09547	0.577323	-1.18038	1.14723	-0.274462	0.825757	2
OsTN1g003644	-1.12565	0.687936	-1.23583	0.408757	0.0137452	1.25104	2
OsTN1g003645	-1.05922	0.69226	-0.97387	1.10035	-0.657805	0.89829	3
OsTN1g003658	0.959295	-0.695195	1.23955	-1.04873	0.427013	-0.881935	8
OsTN1g003661	0.689852	-0.783984	0.877734	-1.18942	1.109	-0.703174	5
OsTN1g003670	-0.224319	0.390969	1.02808	0.985464	-1.53288	-0.647321	1
OsTN1g003672	-0.451694	-0.628904	-0.488277	-0.480073	1.98168	0.0672704	4
OsTN1g003675	-0.900377	0.687023	-0.931009	0.940581	-0.884285	1.08807	2
OsTN1g003682	-0.498958	-0.340273	-0.840046	-0.262917	1.96467	-0.0224808	4
OsTN1g003684	1.7817	-0.651632	0.539487	-0.759119	-0.211115	-0.69932	6
OsTN1g003685	-0.447723	0.776131	-1.0191	1.19504	-1.14752	0.643169	3
OsTN1g003688	-0.731872	1.01715	-0.902685	0.703464	-1.07171	0.985646	3
OsTN1g003689	0.204101	-0.902167	0.592827	-0.828276	1.62244	-0.68893	5
OsTN1g003691	-1.08876	0.692224	-1.03149	-0.501072	1.2471	0.682001	4
OsTN1g003694	1.34464	-0.757718	0.601489	-0.882082	0.692716	-0.999045	8
OsTN1g003699	-0.957868	0.760687	-0.795335	1.27056	-0.919505	0.64146	3
OsTN1g003702	-0.263785	-0.346446	-0.467796	1.5898	-1.23903	0.727256	1
OsTN1g003706	-1.05591	0.779251	-0.942396	0.456888	-0.591158	1.35333	2
OsTN1g003709	-0.100267	-0.631671	-0.0626887	-0.670742	1.97032	-0.504946	4
OsTN1g003729	-0.797594	0.7589	-0.315515	1.6423	-0.928335	-0.359752	1
OsTN1g003730	0.165723	1.77088	-0.693873	-0.0454466	-1.16267	-0.0346051	7
OsTN1g003732	-0.114739	0.935544	-0.582652	1.21412	-1.51464	0.0623623	1
OsTN1g003733	-0.43194	-0.521897	-0.319784	-0.488438	2.03164	-0.269578	4
OsTN1g003735	-0.764231	-0.209165	-0.767762	1.08904	-0.765753	1.41787	2
OsTN1g003736	-0.431254	-0.908683	0.905523	-0.295317	1.55122	-0.82149	5
OsTN1g003743	1.26295	-0.717648	0.129155	-0.859977	1.12147	-0.93595	8
OsTN1g003747	-1.38166	0.16188	-0.949551	0.951642	0.100823	1.11686	2
OsTN1g003754	-0.800664	0.951177	-0.377437	1.39745	-1.16569	-0.00483794	1
OsTN1g003756	1.19811	0.114909	0.575195	-1.35318	0.521863	-1.0569	8
OsTN1g003764	-0.74994	1.53376	-0.807715	0.654507	-0.949952	0.31934	7
OsTN1g003768	0.557616	-0.536005	1.18671	-0.892446	0.87819	-1.19407	8
OsTN1g003779	0.230537	-0.793423	0.199589	-0.847726	1.79412	-0.583095	5
OsTN1g003783	1.34562	-0.981342	1.12126	-0.41369	-0.201636	-0.870208	6
OsTN1g003784	1.14078	-0.410616	1.02913	-0.90853	0.375745	-1.2265	8
OsTN1g003787	1.66416	-0.545324	0.787611	-0.375761	-0.756259	-0.774427	6
OsTN1g003788	1.35927	0.405701	-0.324516	0.520499	-1.56737	-0.393592	1
OsTN1g003795	0.0182069	-0.656711	-0.189392	-0.91662	1.91405	-0.169535	4
OsTN1g003797	-0.272257	-0.218334	-1.0438	-0.592061	1.83044	0.296011	4
OsTN1g003798	-1.10867	0.445865	-1.05218	0.700004	-0.346872	1.36185	2
OsTN1g003800	1.29128	-0.521822	1.07029	-0.810805	0.0888634	-1.1178	6
OsTN1g003805	1.4542	-0.512307	0.848445	-0.402396	-0.0703238	-1.31762	6
OsTN1g003807	-0.336341	-0.60581	-0.36924	-0.441784	2.02801	-0.274836	4
OsTN1g003816	-0.494791	-0.707492	-0.525554	-0.344464	1.9615	0.110798	4
OsTN1g003820	-0.695368	0.557659	-0.938324	0.768441	-1.00535	1.31294	2
OsTN1g003826	-0.483369	1.02549	-1.07144	0.80873	-1.1076	0.828198	3
OsTN1g003833	0.145578	-0.441345	-0.449803	-0.384185	1.94254	-0.812789	4
OsTN1g003834	1.54754	-0.460903	0.909979	-0.554258	-0.391618	-1.05074	6
OsTN1g003841	0.639516	-1.02554	0.806949	-1.18542	1.15383	-0.389332	5
OsTN1g003842	0.11017	0.637341	-0.810814	1.34138	-1.4478	0.169726	1
OsTN1g003843	0.0594679	0.550723	-0.738264	1.41892	-1.45216	0.161314	1
OsTN1g003849	-0.192454	-0.583279	-0.349509	-0.5784	2.01691	-0.313264	4
OsTN1g003850	1.57534	-0.847517	-0.185936	-0.496479	0.848483	-0.893889	8
OsTN1g003851	1.62461	-0.876025	-0.0970465	-0.498754	0.737044	-0.889833	8
OsTN1g003854	-0.222217	0.577548	-0.899777	1.37005	-1.30432	0.478716	3
OsTN1g003856	0.208904	1.44249	0.508709	-0.0173562	-1.47189	-0.670855	7
OsTN1g003857	-0.392227	-0.880999	0.404575	-0.843676	1.78581	-0.0734859	4
OsTN1g003863	-0.649123	1.83982	-0.694193	0.375916	-0.744379	-0.128037	7
OsTN1g003871	-0.760803	-0.284133	-0.769956	-0.602147	0.72686	1.69018	2
OsTN1g003875	1.29991	-0.993099	0.721412	-0.789297	0.639485	-0.878415	8
OsTN1g003876	1.39397	-0.809274	0.305333	-1.25115	0.762855	-0.401732	8
OsTN1g003879	-0.505236	1.88784	-0.452214	0.292365	-0.879027	-0.343724	7
OsTN1g003883	0.468847	-0.875059	1.56835	-0.785237	0.469994	-0.846898	8
OsTN1g003884	0.659886	-0.832677	1.53433	-0.818932	0.319961	-0.862564	8
OsTN1g003888	1.25302	-0.846428	0.44856	-0.919889	0.944504	-0.879772	8
OsTN1g003890	-0.405277	1.19967	-0.527962	0.502487	-1.51797	0.749055	3
OsTN1g003899	1.0384	-0.550057	1.40498	-1.15512	-0.230496	-0.5077	6
OsTN1g003912	-0.961788	0.95312	-0.836185	0.797463	-0.932927	0.980317	3
OsTN1g003913	0.851357	-0.665169	-0.903461	-1.13805	0.938191	0.917133	4
OsTN1g003919	1.32337	-0.836419	1.1077	-0.994823	-0.576077	-0.0237481	6
OsTN1g003924	-0.984266	0.795774	-0.918722	1.38646	-0.683985	0.404739	3
OsTN1g003934	1.00258	-0.928202	1.13644	-1.12266	0.493289	-0.581447	8
OsTN1g003940	-0.814237	0.476714	-0.675042	1.68493	-0.878884	0.206517	1
OsTN1g003944	1.43203	-0.616248	1.00929	-0.955705	-0.0744188	-0.79495	6
OsTN1g003945	-0.943056	0.20229	-1.04833	1.24224	-0.525956	1.07282	2
OsTN1g003947	1.4911	-0.495294	0.86261	-0.889302	0.0286392	-0.997757	6
OsTN1g003948	1.57175	-0.489828	0.844273	-0.832836	-0.168816	-0.924538	6
OsTN1g003952	1.26539	0.532148	0.743423	-0.457439	-1.34438	-0.739135	6
OsTN1g003954	0.105487	-0.728485	0.272859	-0.849698	1.81275	-0.612917	5
OsTN1g003957	-1.05094	0.839239	-0.792474	1.1578	-0.854913	0.701293	3
OsTN1g003958	-1.37973	0.551429	-0.838535	1.01488	-0.324652	0.9766	2
OsTN1g003969	0.199	1.49569	-0.0903372	0.10911	-1.64263	-0.0708351	7
OsTN1g003970	1.57409	-0.688143	0.824829	-0.257315	-1.07734	-0.376125	6
OsTN1g003988	0.0167244	-0.654158	0.125536	-0.816378	1.89039	-0.562119	4
OsTN1g003994	0.123997	-0.824812	-0.999903	-0.631403	1.47138	0.860738	4
OsTN1g003995	-0.528462	1.99398	-0.570338	-0.084031	-0.609855	-0.201289	7
OsTN1g003997	0.15197	-0.878918	0.228594	-0.980621	1.76341	-0.28444	5
OsTN1g004006	1.70581	-0.706509	0.467913	-0.816092	0.171497	-0.822618	8
OsTN1g004010	1.07503	-0.582739	1.31244	-0.933652	0.0797863	-0.950868	6
OsTN1g004013	0.382467	-0.341346	1.75308	-0.68819	-0.0151137	-1.0909	6
OsTN1g004014	0.376287	-0.325917	1.73755	-0.706965	0.0291975	-1.11016	6
OsTN1g004021	1.53693	-0.301363	-0.0426461	0.720085	-0.642733	-1.27027	6
OsTN1g004029	0.395172	-0.871084	0.16297	-0.993062	1.70645	-0.400444	5
OsTN1g004031	1.35891	-0.781662	0.90313	-0.920698	0.321174	-0.88085	8
OsTN1g004039	0.649264	-1.08084	0.257831	-0.854725	1.5351	-0.506634	5
OsTN1g004042	-0.921803	0.486147	-0.908289	1.08112	-0.839565	1.10239	2
OsTN1g004045	-0.864863	0.275145	-0.864918	1.08505	-0.859858	1.22945	2
OsTN1g004046	-0.913778	0.705141	-0.918382	0.952785	-0.887917	1.06215	3
OsTN1g004047	-0.907697	0.517726	-0.902622	1.16803	-0.865423	0.98999	3
OsTN1g004049	-1.00991	-0.284458	-1.10556	0.0910146	1.11516	1.19375	2
OsTN1g004050	-0.154738	-0.656502	-0.306239	-0.89982	1.90499	0.112308	4
OsTN1g004051	-1.15483	0.696451	-0.937691	0.973171	-0.584035	1.00693	2
OsTN1g004058	-0.917812	0.725907	-0.840269	1.20972	-0.938902	0.761351	3
OsTN1g004060	-1.10303	0.656007	-1.06244	0.983494	-0.484885	1.01085	2
OsTN1g004062	0.239145	1.85165	-0.450205	-0.130426	-0.47741	-1.03275	7
OsTN1g004070	-0.832511	0.40811	-0.94986	1.1821	-0.858465	1.05063	2
OsTN1g004071	-0.810556	-0.185791	-0.907063	1.36626	-0.59014	1.12729	2
OsTN1g004072	0.194282	-0.52846	-0.110691	-0.888271	1.8899	-0.55676	4
OsTN1g004075	0.145678	-0.703295	-0.201443	-0.846212	1.90696	-0.301685	4
OsTN1g004077	0.866695	-0.514103	1.14794	-1.50334	0.452361	-0.449553	8
OsTN1g004083	-0.270366	-0.698356	0.401314	-1.00444	1.79436	-0.222508	4
OsTN1g004093	-1.09224	-0.043638	-1.08699	1.23845	-0.0579136	1.04233	2
OsTN1g004095	0.286152	-1.02596	1.49568	-1.0149	-0.401947	0.660969	6
OsTN1g004097	1.39315	-0.636831	1.13039	-0.625162	-0.32318	-0.938366	6
OsTN1g004105	0.649082	-0.998704	1.11632	-1.22023	0.836393	-0.382863	8
OsTN1g004106	0.292488	-0.898641	1.40393	-0.64156	0.84712	-1.00333	8
OsTN1g004113	-0.740509	1.54027	-0.62217	-0.246453	-0.868068	0.93693	7
OsTN1g004117	-0.734756	0.0355759	-1.01531	1.58962	-0.605893	0.730758	3
OsTN1g004118	-1.94975	0.634466	0.11562	0.594577	-0.0481616	0.653245	2
OsTN1g004126	1.9789	-0.236239	-0.000553555	-0.509443	-0.682889	-0.54978	6
OsTN1g004143	0.288864	-1.11484	1.04179	-1.30252	0.931507	0.155199	5
OsTN1g004146	1.17417	-0.728039	1.05523	-0.88558	0.400611	-1.01639	8
OsTN1g004147	-0.515616	0.452011	0.478461	1.33233	-1.58051	-0.166674	1
OsTN1g004155	0.889711	-0.377754	0.437367	-0.561252	1.12584	-1.51391	8
OsTN1g004163	-0.40614	0.691904	-1.00651	1.01299	-1.21252	0.920274	3
OsTN1g004178	1.15027	-0.545297	0.609	-1.08318	0.890327	-1.02112	8
OsTN1g004179	0.104663	-0.844113	-0.0297671	-1.04645	1.78312	0.0325518	4
OsTN1g004180	-0.046801	-0.59792	-0.40092	-1.08517	1.78367	0.34714	4
OsTN1g004184	1.58653	-0.505402	0.603271	-0.711385	0.178362	-1.15138	8
OsTN1g004185	1.52809	0.0884358	0.744523	-1.18356	-0.52254	-0.654946	6
OsTN1g004205	0.364309	-0.939684	0.413668	-0.998869	1.61517	-0.454589	5
OsTN1g004206	0.845108	-0.800674	-0.0792952	-0.855253	1.56551	-0.675393	5
OsTN1g004207	1.06672	-0.549871	0.90557	-1.07779	0.699082	-1.04371	8
OsTN1g004208	0.980385	-0.55813	0.942779	-1.09453	0.76027	-1.03077	8
OsTN1g004215	1.09404	-0.941795	0.8311	-0.852083	0.797705	-0.92897	8
OsTN1g004216	0.0913263	-0.721211	0.127691	-0.802283	1.86894	-0.564462	4
OsTN1g004222	1.31361	-0.268696	1.04302	-0.19488	-0.569337	-1.32372	6
OsTN1g004225	0.704531	-0.846693	1.50456	-0.823375	0.322032	-0.86105	8
OsTN1g004234	1.45723	-0.493168	0.431283	-1.05614	0.62862	-0.967821	8
OsTN1g004235	0.685847	0.449852	-0.528336	-1.03321	1.41499	-0.989139	5
OsTN1g004237	0.355659	-0.720947	0.104533	-0.852579	1.78063	-0.667295	5
OsTN1g004238	1.20286	-0.356087	1.1988	-1.19373	-0.108585	-0.743253	6
OsTN1g004240	-0.104972	-0.875255	0.878926	-1.3633	1.24186	0.222741	5
OsTN1g004242	-0.785397	0.40771	-0.987183	0.83217	-0.830919	1.36362	2
OsTN1g004246	0.976182	-0.742742	1.38788	-0.641738	0.0922642	-1.07185	6
OsTN1g004248	-0.193479	-0.553861	-0.704809	-0.721151	1.88583	0.287472	4
OsTN1g004255	-1.02578	0.196343	-0.47583	1.26007	1.04583	-1.00064	1
OsTN1g004258	1.31259	-0.871343	0.605114	-0.750358	0.730879	-1.02688	8
OsTN1g004271	0.0992722	-0.851911	0.641029	-0.866904	1.63451	-0.655995	5
OsTN1g004277	0.288125	-0.76824	-0.396329	-0.679623	1.89543	-0.339365	4
OsTN1g004283	-1.0988	0.329346	-0.82135	1.35372	-0.639376	0.876459	2
OsTN1g004285	0.579328	-0.668206	-0.113192	-0.843087	1.73668	-0.691525	5
OsTN1g004291	-0.891724	0.602723	-1.22762	0.996073	-0.516535	1.03708	2
OsTN1g004292	-0.30953	0.442006	-1.31965	1.20966	-0.878371	0.855884	3
OsTN1g004295	0.866113	-0.988024	0.631674	-1.07595	1.16533	-0.599142	5
OsTN1g004298	-1.0565	0.491562	-0.963738	0.978015	-0.620569	1.17123	2
OsTN1g004299	-1.12348	0.514105	-1.03218	1.05043	-0.456091	1.04722	2
OsTN1g004302	0.79607	0.795246	0.272665	0.595018	-1.60508	-0.853916	1
OsTN1g004308	1.36016	-0.626312	0.809315	-0.773872	0.392508	-1.1618	8
OsTN1g004313	1.24166	-0.857219	0.628118	-1.00446	0.808333	-0.816432	8
OsTN1g004316	1.49538	-0.0813573	0.439561	-0.795981	0.299191	-1.3568	8
OsTN1g004317	1.17551	-0.558883	1.0206	-1.37169	0.284001	-0.549537	8
OsTN1g004318	-0.696128	0.677762	-0.73121	1.16574	-1.22686	0.810697	3
OsTN1g004324	-0.418125	-0.429974	-0.275661	-0.463553	2.03656	-0.449251	4
OsTN1g004325	-0.520716	-0.405186	-0.432604	-0.305474	2.03611	-0.372128	4
OsTN1g004326	-0.443646	-0.435452	-0.356611	-0.396185	2.04026	-0.408366	4
OsTN1g004330	0.830419	-0.885581	-0.243927	-1.10496	1.49576	-0.091706	5
OsTN1g004331	0.644046	-0.624545	1.46247	-1.3041	0.32328	-0.501152	8
OsTN1g004333	-0.558369	0.199007	-0.580699	1.92788	-0.724988	-0.26283	1
OsTN1g004334	-0.673766	0.831651	-0.673125	1.64428	-0.738142	-0.390895	1
OsTN1g004339	-0.792962	0.223582	-0.874327	1.12511	-0.899037	1.21764	2
OsTN1g004340	-0.742482	0.567713	-1.02798	1.23964	-0.893745	0.856855	3
OsTN1g004347	1.09368	-0.789895	0.426162	-1.1545	1.09978	-0.675226	5
OsTN1g004349	-0.12386	-0.736111	-0.550636	-0.776757	1.84998	0.337387	4
OsTN1g004354	0.673904	-0.92212	0.466829	-0.777534	1.44498	-0.886057	5
OsTN1g004355	0.525114	-1.23278	0.574392	-0.663935	1.4272	-0.629981	5
OsTN1g004359	1.45146	-0.610464	0.854974	-0.882049	0.176292	-0.990215	8
OsTN1g004365	1.31575	-0.737945	0.609419	-1.02999	0.721266	-0.878498	8
OsTN1g004367	-1.29389	1.08045	-0.276617	0.892672	-0.977215	0.574599	3
OsTN1g004369	-1.15856	0.821741	-1.17869	0.731008	-0.220564	1.00506	2
OsTN1g004377	-0.910086	0.72954	-1.23224	1.09337	-0.501589	0.821001	3
OsTN1g004379	1.04228	-0.900694	0.712135	-1.01154	0.961975	-0.804152	8
OsTN1g004399	0.248624	-0.380398	-0.69616	1.07679	-1.37311	1.12425	3
OsTN1g004405	-0.418135	-0.580596	-0.170155	-0.598203	2.01048	-0.243391	4
OsTN1g004413	-0.995772	0.862348	-0.705799	1.02535	-1.01447	0.828345	3
OsTN1g004415	-0.222204	-0.636777	-0.0697708	-0.932504	1.91515	-0.0538956	4
OsTN1g004417	-0.615142	1.65506	-0.736322	0.641403	-0.963565	0.0185649	7
OsTN1g004424	-0.508862	-0.956924	-0.457675	-0.480341	1.69991	0.703888	4
OsTN1g004426	-0.216528	-0.797631	-0.547499	-0.797399	1.72667	0.632388	4
OsTN1g004433	-1.19566	0.677902	-1.14365	1.31215	0.275104	0.0741498	3
OsTN1g004441	-0.688168	0.956692	-0.631282	1.56209	-0.762929	-0.436406	1
OsTN1g004444	-0.158519	1.08774	1.16706	-0.23504	-0.363902	-1.49733	6
OsTN1g004446	-0.47259	-0.364572	-0.291292	-0.435241	2.03622	-0.472522	4
OsTN1g004447	-1.14092	0.382935	-0.964592	0.687742	-0.380576	1.41541	2
OsTN1g004449	1.04098	-0.283273	1.24521	-1.09739	0.126601	-1.03213	8
OsTN1g004450	0.975667	-0.280773	1.28566	-1.10892	0.158634	-1.03027	8
OsTN1g004470	-0.65608	-0.621071	0.0289516	0.490144	-0.972902	1.73096	2
OsTN1g004472	0.457586	-1.13136	1.03513	-1.01466	1.10002	-0.446719	5
OsTN1g004478	1.29229	-0.807539	0.790735	-0.78557	0.566058	-1.05597	8
OsTN1g004479	0.479811	-1.60127	-0.120031	-0.533689	1.29432	0.480853	5
OsTN1g004493	0.0696424	-0.473749	-0.114367	-0.776995	1.93513	-0.639665	4
OsTN1g004494	-0.339134	-0.397431	-0.316827	-0.553324	2.03415	-0.427438	4
OsTN1g004505	1.05574	-0.721583	0.585409	-1.11488	1.03574	-0.84042	8
OsTN1g004506	1.12559	-0.70051	0.639686	-1.09752	0.918613	-0.885858	8
OsTN1g004507	-0.106407	-0.897157	0.955905	-0.995519	1.45295	-0.409771	5
OsTN1g004508	0.556825	-0.474386	0.0136666	-0.947767	1.69149	-0.83983	5
OsTN1g004509	0.81195	-0.974601	0.393756	-1.099	1.34264	-0.474745	5
OsTN1g004519	-0.343178	0.185167	-0.632259	-1.00769	1.85198	-0.054022	4
OsTN1g004523	-0.226407	1.24851	-0.0826247	0.738478	-1.68456	0.00660011	7
OsTN1g004525	1.51871	-0.84887	0.736388	-1.05764	0.180176	-0.52877	8
OsTN1g004529	-0.774389	1.45271	-0.690834	1.00214	-0.894034	-0.0955862	7
OsTN1g004530	-0.727412	0.332727	-0.349048	1.87382	-0.775501	-0.354585	1
OsTN1g004543	-1.31008	-0.443451	-0.653798	1.29091	0.128129	0.988291	2
OsTN1g004544	-0.927664	0.493078	-0.885809	0.985477	-0.853424	1.18834	2
OsTN1g004545	-0.982349	0.126783	-0.70186	0.205528	-0.457684	1.80958	2
OsTN1g004548	-0.432129	2.03435	-0.344094	-0.488578	-0.28121	-0.488344	7
OsTN1g004549	-0.579313	2.0103	-0.168901	-0.219118	-0.557907	-0.485062	7
OsTN1g004555	-0.506411	-0.0911848	2.00467	-0.294309	-0.62984	-0.482925	6
OsTN1g004556	-0.546375	-0.0827543	1.99934	-0.257629	-0.633732	-0.478846	6
OsTN1g004564	-0.874384	0.670251	-0.622911	1.4732	-1.03691	0.390753	3
OsTN1g004566	-0.867723	0.65273	-1.11254	1.19713	-0.690321	0.82072	3
OsTN1g004569	-0.684113	0.487912	-0.555765	1.82238	-0.748649	-0.321761	1
OsTN1g004571	-0.801614	0.532484	-0.837088	1.465	-0.941811	0.583029	3
OsTN1g004577	0.260125	-0.756536	0.187841	-0.992313	1.7671	-0.466222	5
OsTN1g004579	1.17297	0.0655988	0.964631	-0.250563	-0.376248	-1.57639	6
OsTN1g004583	-0.125238	-0.575751	-0.463711	-0.577133	2.0084	-0.266565	4
OsTN1g004586	1.09875	-1.1219	0.834681	-0.906734	0.75848	-0.663277	8
OsTN1g004599	1.22611	-0.295659	0.300769	-1.00403	0.955252	-1.18245	8
OsTN1g004601	-0.0881099	-0.818807	1.57709	-1.25677	0.497101	0.0894932	5
OsTN1g004602	-0.696049	1.82702	-0.71589	0.113219	-0.770433	0.242133	7
OsTN1g004609	1.15378	0.336457	1.11964	-0.915688	-0.727952	-0.966232	6
OsTN1g004617	0.234057	-0.549542	-0.0464417	-0.945643	1.85627	-0.548702	4
OsTN1g004624	-0.504814	0.23731	-0.175766	1.88209	-0.920119	-0.518706	1
OsTN1g004629	-1.01437	-0.518126	1.68793	-0.523107	-0.322262	0.689934	6
OsTN1g004631	-0.188297	-0.530255	0.00266786	1.81816	-1.17168	0.069404	1
OsTN1g004635	-0.963195	0.835625	-1.03207	1.1247	-0.704771	0.739707	3
OsTN1g004638	-0.951584	0.502048	-0.727615	0.754826	-0.940807	1.36313	2
OsTN1g004639	-0.816137	0.579117	-0.799019	0.273312	-0.842265	1.60499	2
OsTN1g004640	-0.88809	0.300815	-0.982708	1.4183	-0.676491	0.82817	3
OsTN1g004641	-0.797198	0.152745	-0.683879	1.60365	-0.932597	0.657274	3
OsTN1g004642	-0.21259	1.14934	-0.727051	1.11987	-1.36021	0.0306399	3
OsTN1g004646	-0.823701	1.58812	-0.939705	0.589883	-0.698443	0.283848	7
OsTN1g004662	-0.971792	0.784733	-0.651372	1.37934	-0.965675	0.424768	3
OsTN1g004664	-0.538811	-0.025616	-0.567726	1.98953	-0.603223	-0.254158	1
OsTN1g004674	-0.374018	-0.750737	0.408003	-0.47849	1.85992	-0.664675	4
OsTN1g004678	0.5713	-0.722631	0.279766	-1.43629	1.41386	-0.106004	5
OsTN1g004683	1.32402	-0.770138	1.14855	-0.316905	-0.322329	-1.06319	6
OsTN1g004689	-0.505181	0.733607	-1.00028	0.997435	-1.1582	0.932612	3
OsTN1g004702	-1.05485	0.943012	-0.7971	0.969828	-0.873134	0.81224	3
OsTN1g004712	0.201247	-0.816117	1.10746	-0.809871	1.24509	-0.927813	5
OsTN1g004713	-0.781054	0.0649126	-1.11669	1.24971	-0.547179	1.1303	2
OsTN1g004721	-0.627172	0.184052	-0.550395	1.83567	-0.94335	0.101191	1
OsTN1g004722	1.14745	-0.468116	1.28537	-0.838283	-0.0759197	-1.0505	6
OsTN1g004724	-0.340305	-0.466587	-0.410988	-0.46269	2.03848	-0.357908	4
OsTN1g004730	-0.817532	0.498856	-0.992993	0.638779	-0.773133	1.44602	2
OsTN1g004731	-0.311729	1.89411	-0.596802	-0.410537	-0.846596	0.271555	7
OsTN1g004744	1.58228	-0.0037057	0.548635	-1.37689	-0.470203	-0.280123	6
OsTN1g004755	-0.0965739	-0.567324	1.99919	-0.55118	-0.217653	-0.56646	6
OsTN1g004756	0.337932	-0.904541	1.72912	-0.88945	0.216571	-0.489629	8
OsTN1g004760	0.175382	0.152397	-1.20575	1.39189	-1.10039	0.586476	3
OsTN1g004761	-1.09999	0.389066	-1.04788	1.31078	-0.376844	0.824879	2
OsTN1g004773	-0.797085	-0.0892625	-0.544207	1.50988	-0.982436	0.903107	3
OsTN10g000024	0.648155	-0.715428	0.613555	-1.36886	1.27138	-0.448806	5
OsTN10g000028	1.1321	-0.678885	0.308274	-0.869925	1.14961	-1.04118	8
OsTN10g000029	-0.40857	1.25666	-0.771002	0.932648	-1.30481	0.295067	3
OsTN10g000030	-0.856455	0.663693	-1.05555	1.29803	-0.740992	0.691272	3
OsTN10g000053	0.544848	0.695785	-0.568766	0.451205	-1.79873	0.675658	3
OsTN10g000058	-0.21875	-0.367385	-0.308385	-0.585086	2.02143	-0.541824	4
OsTN10g000075	-0.834507	0.18717	-0.229225	1.85421	-0.876153	-0.10149	1
OsTN10g000077	-0.546712	-0.167202	0.423594	1.6279	-1.35766	0.020082	1
OsTN10g000087	-0.479738	0.924295	-1.19556	0.741319	-0.979176	0.988856	3
OsTN10g000089	-0.72614	0.305998	-1.44635	1.01725	1.09236	-0.243127	2
OsTN10g000100	0.888633	-0.90086	0.793844	-1.01508	1.04165	-0.80819	8
OsTN10g000103	0.622125	0.713403	0.375412	0.816502	-1.49002	-1.03742	1
OsTN10g000104	-0.478579	1.00212	-0.598959	0.165219	-1.34425	1.25445	3
OsTN10g000134	-0.403071	-0.51493	-0.195908	-0.521878	2.02697	-0.391187	4
OsTN10g000143	-1.19326	0.48694	-0.921586	0.767064	-0.444448	1.30529	2
OsTN10g000181	-0.68665	-0.116127	-1.04459	1.10474	-0.610435	1.35306	2
OsTN10g000184	-0.491377	-0.0903405	-1.26658	0.7413	-0.442469	1.54947	2
OsTN10g000189	-0.974328	1.49825	-0.66996	0.816046	-0.818071	0.148067	7
OsTN10g000190	-0.755462	0.835296	-1.08923	0.724139	-0.852373	1.13763	2
OsTN10g000204	-0.941406	0.411199	-1.10276	1.38424	-0.500755	0.749486	3
OsTN10g000214	1.11669	-1.09803	0.589828	-1.32167	0.671458	0.0417284	8
OsTN10g000215	0.329633	-1.11944	0.831268	-1.39503	0.88296	0.470606	5
OsTN10g000216	0.0298813	-0.988011	-0.396317	-0.775231	0.358747	1.77093	4
OsTN10g000226	1.57685	0.0326618	0.731229	-0.630992	-0.611971	-1.09778	6
OsTN10g000233	1.35136	0.0554184	0.575536	-1.26013	0.34276	-1.06494	8
OsTN10g000234	-0.313936	1.98867	-0.241403	-0.756302	-0.129728	-0.547301	7
OsTN10g000253	0.526642	-0.760954	0.83957	-1.02804	1.28202	-0.859237	5
OsTN10g000268	-1.11038	0.688881	0.596205	0.366294	-1.423	0.882004	3
OsTN10g000269	-1.09176	0.643163	0.639816	0.316856	-1.42783	0.919753	3
OsTN10g000271	1.17164	-0.520888	1.14009	-0.945768	0.211719	-1.0568	8
OsTN10g000283	-0.711324	-0.0146499	-0.818165	0.727969	-0.808756	1.62493	2
OsTN10g000285	-0.673077	0.687367	-0.889395	1.34335	-1.06154	0.593298	3
OsTN10g000341	-0.973162	0.857328	-0.952022	1.09913	-0.791208	0.759935	3
OsTN10g000369	-0.398008	-0.55725	-0.115789	-0.508774	2.01688	-0.437054	4
OsTN10g000373	0.389539	1.26061	-0.266483	0.383232	-1.74376	-0.0231439	7
OsTN10g000383	-1.00002	0.203633	-0.941437	1.01765	-0.582586	1.30276	2
OsTN10g000386	-1.17424	-0.155228	-1.10875	0.668581	0.463563	1.30608	2
OsTN10g000395	-0.309759	-0.540363	-0.221904	-0.541832	2.02491	-0.411054	4
OsTN10g000396	-0.305145	-0.532503	-0.248987	-0.53411	2.02747	-0.406726	4
OsTN10g000412	-0.0843702	1.92632	-0.614623	0.0947623	-0.764669	-0.557419	7
OsTN10g000419	-0.670731	-0.400944	0.748886	1.69556	-0.761784	-0.610985	1
OsTN10g000443	1.4651	-0.675581	0.203174	-0.933868	0.831388	-0.890213	8
OsTN10g000447	-1.12823	0.336195	-0.32445	0.855533	-1.04059	1.30155	2
OsTN10g000454	0.934235	-0.616268	1.54039	-0.68217	-0.258267	-0.917917	6
OsTN10g000458	0.211178	-0.779327	0.93682	-1.06928	1.37051	-0.669898	5
OsTN10g000467	-0.256372	2.03042	-0.419879	-0.344577	-0.563928	-0.445665	7
OsTN10g000468	-0.384069	2.03848	-0.474278	-0.464731	-0.345507	-0.369891	7
OsTN10g000470	-0.683949	1.95161	-0.778648	-0.320496	-0.0946541	-0.0738638	7
OsTN10g000483	1.82831	-0.498087	0.363667	-0.105206	-0.750131	-0.838554	6
OsTN10g000486	-0.434034	0.0903299	-1.23241	0.901669	-0.722065	1.39651	2
OsTN10g000503	-1.23331	0.648934	-1.00417	0.808889	-0.348833	1.12849	2
OsTN10g000513	-1.46233	0.202021	-0.822291	1.08028	0.988655	0.0136621	2
OsTN10g000518	1.55184	-0.695301	0.480083	-0.810819	0.472697	-0.998499	8
OsTN10g000529	0.283069	-1.76812	-0.388204	0.427675	0.267163	1.17841	2
OsTN10g000547	0.0480779	-1.0569	-0.648405	-0.745087	1.10237	1.29994	4
OsTN10g000567	0.419916	-1.12943	-0.492671	-0.952323	1.27406	0.880443	4
OsTN10g000577	0.573343	0.815499	0.381158	-0.769037	0.676076	-1.67704	8
OsTN10g000587	1.40146	-0.734386	1.0416	-0.601136	-0.0863564	-1.02119	6
OsTN10g000607	-0.819847	1.10118	-1.12575	0.603605	-0.732416	0.973222	3
OsTN10g000625	-1.0044	0.474655	0.578057	1.37766	-1.22146	-0.204513	1
OsTN10g000654	0.5076	-0.871704	1.56185	-0.500399	0.375742	-1.07309	8
OsTN10g000660	1.6232	-0.648137	0.852239	-0.697513	-0.348016	-0.781778	6
OsTN10g000665	-0.624103	1.98807	-0.534919	0.0286763	-0.46913	-0.388599	7
OsTN10g000666	-0.622148	1.98682	-0.534493	0.0348065	-0.479946	-0.385036	7
OsTN10g000686	0.144035	-0.768615	0.188464	-0.768976	1.83452	-0.629428	5
OsTN10g000696	0.669495	-0.322417	0.787585	0.885546	-1.71817	-0.302037	1
OsTN10g000704	1.69778	-0.351822	0.678897	-1.00613	-0.480429	-0.53829	6
OsTN10g000713	0.780226	-0.860764	0.344134	-0.864969	1.4415	-0.840126	5
OsTN10g000728	1.73376	-0.117391	0.59128	-0.777981	-0.756493	-0.673172	6
OsTN10g000736	-0.921038	-0.722097	-0.674591	1.51266	-0.128027	0.933097	2
OsTN10g000737	-1.06605	-0.745803	-0.621025	0.11261	0.830636	1.48963	2
OsTN10g000761	0.749224	-0.911215	0.351039	-0.967918	1.4489	-0.670031	5
OsTN10g000765	0.224515	-0.821755	1.12574	-0.960887	1.21375	-0.781364	5
OsTN10g000776	1.58927	-0.614245	0.931844	-0.645094	-0.540273	-0.721498	6
OsTN10g000779	-0.960693	0.768182	-0.915773	1.07493	-0.847121	0.880474	3
OsTN10g000782	-0.720176	1.84725	-0.106846	-0.315367	-0.948137	0.243278	7
OsTN10g000785	1.00539	-1.27443	0.753925	-0.965	0.852491	-0.372372	8
OsTN10g000793	0.677933	1.48075	0.108402	-0.112739	-1.11405	-1.04029	7
OsTN10g000799	1.05703	-0.815594	-1.00176	-0.707398	1.29798	0.169754	4
OsTN10g000806	0.329467	1.70217	0.321106	-0.789008	-0.630544	-0.93319	7
OsTN10g000815	0.912929	-0.871682	1.38379	-0.884595	0.260499	-0.800936	8
OsTN10g000822	-0.66292	0.405758	-0.848102	1.75216	-0.769152	0.122251	1
OsTN10g000824	-0.895586	1.17942	-0.403571	1.31975	-0.901898	-0.298112	1
OsTN10g000827	1.07075	-1.36198	1.0163	-0.385831	0.446506	-0.785744	8
OsTN10g000850	-0.0395188	-1.87156	-0.0265084	0.375094	0.5228	1.0397	4
OsTN10g000865	-0.989366	0.511644	-0.805701	1.42472	-0.802226	0.660932	3
OsTN10g000866	-1.00038	0.466	-0.783271	1.43691	-0.800154	0.680895	3
OsTN10g000896	0.382504	-0.403463	-0.104126	1.71624	-1.27968	-0.311476	1
OsTN10g000902	-0.137844	-0.928365	1.18042	-0.895466	1.29027	-0.509013	5
OsTN10g000903	-0.650859	-1.0867	-0.225049	-0.484586	1.46403	0.98316	4
OsTN10g000909	-0.454589	-1.00349	-0.388292	-0.220719	1.88514	0.181947	4
OsTN10g000915	-1.15981	0.766125	-1.35244	0.89784	0.233235	0.615048	2
OsTN10g000929	-1.02392	0.272495	-0.611162	1.80454	-0.494655	0.0527033	1
OsTN10g000938	1.18394	-0.953679	0.796687	-0.978198	0.715898	-0.764649	8
OsTN10g000942	-0.00905373	-0.533898	-0.301599	-0.407685	1.98141	-0.729178	4
OsTN10g000945	-0.268769	-0.878354	0.614772	-0.890186	1.70477	-0.282229	5
OsTN10g000953	0.613959	-1.93335	0.377135	0.367888	-0.183287	0.757655	6
OsTN10g000967	1.37629	-0.651005	0.984945	-0.772625	0.112311	-1.04992	8
OsTN10g000973	-0.1274	1.49439	-0.295765	0.69795	-1.4373	-0.331873	7
OsTN10g000975	1.02062	-0.86965	-0.10272	-1.08426	1.37801	-0.341993	5
OsTN10g000978	-0.208909	-0.691629	-0.278951	-0.71498	1.97058	-0.0761155	4
OsTN10g001006	1.74023	-0.3334	0.428934	-0.932553	-0.00500571	-0.898207	6
OsTN10g001009	0.926792	0.510418	1.21184	-1.02452	-0.665975	-0.958555	6
OsTN10g001010	1.10377	-0.307032	1.13068	-1.26222	0.212629	-0.877824	8
OsTN10g001011	-0.311839	-0.304675	-0.285317	-0.567614	2.02443	-0.554987	4
OsTN10g001040	-0.738593	-0.657183	-0.822393	-0.0812834	1.73961	0.559847	4
OsTN10g001052	-0.96832	0.552594	0.426414	1.05895	-1.5048	0.435163	1
OsTN10g001055	-0.40035	-1.05429	1.12507	-0.716526	1.36026	-0.314168	5
OsTN10g001056	-0.829198	0.389053	1.11674	1.11736	-1.06483	-0.72912	1
OsTN10g001060	-0.561062	-0.381997	-0.553396	0.0913642	-0.569767	1.97486	2
OsTN10g001061	0.341528	-0.987349	0.466583	-1.01394	1.58423	-0.391056	5
OsTN10g001064	-0.282053	0.343418	1.18882	-0.362403	-1.64051	0.752731	7
OsTN10g001075	-0.318464	0.765337	-0.0966771	1.4084	-1.50122	-0.257377	1
OsTN10g001083	1.6608	-0.249049	-0.370158	-0.817961	0.709347	-0.932982	8
OsTN10g001085	-0.456386	-0.48973	-0.181472	-0.520631	2.0261	-0.377884	4
OsTN10g001089	-0.704768	0.30703	-0.457737	1.85823	-0.850465	-0.152291	1
OsTN10g001090	-0.926929	0.0884894	-0.911954	0.754797	-0.559553	1.55515	2
OsTN10g001096	-0.54213	-0.542216	-0.385325	2.02472	-0.348568	-0.206481	1
OsTN10g001102	-0.33651	0.0642893	-0.98042	1.62286	-0.965879	0.595661	3
OsTN10g001109	-1.04584	0.722635	-0.494193	1.58843	-0.785169	0.0141399	1
OsTN10g001139	1.14122	-0.898367	0.587768	-1.19165	0.908487	-0.54746	8
OsTN10g001148	0.877357	-0.753615	1.59002	-0.626226	-0.269359	-0.818181	6
OsTN10g001149	1.44428	-0.282949	0.817312	-0.844529	0.069205	-1.20332	6
OsTN10g001150	1.47688	-0.0329592	0.163067	-0.874121	0.571246	-1.30412	8
OsTN10g001174	-0.182042	-0.728106	-0.0282374	-0.710009	1.95848	-0.310089	4
OsTN10g001184	-0.322966	-0.593629	-0.196561	-0.596873	2.01396	-0.303931	4
OsTN10g001198	-0.506006	-0.512044	-0.804074	-0.584258	1.75025	0.656136	4
OsTN10g001201	-0.896452	0.418613	-0.745768	1.72587	-0.675526	0.173267	1
OsTN10g001204	-0.531507	-0.634749	0.42306	-0.590102	1.87051	-0.53721	4
OsTN10g001210	0.00590879	-0.575998	-0.163972	-0.576013	1.96869	-0.658614	4
OsTN10g001214	-0.907193	1.4254	0.728456	0.342326	-1.13726	-0.451728	7
OsTN10g001215	1.14115	-0.918215	0.912397	-0.82464	0.648984	-0.959677	8
OsTN10g001228	-1.08644	0.895013	-1.05312	0.668769	-0.517263	1.09304	2
OsTN10g001235	1.04715	-1.16324	0.366218	-1.2517	0.917867	0.0836996	5
OsTN10g001250	0.19921	-0.820664	0.0558184	-0.967444	1.8088	-0.275715	4
OsTN10g001257	1.48058	-0.711503	0.979092	-0.765646	-0.121044	-0.861482	6
OsTN10g001267	0.348486	-1.08778	-0.709421	-0.551192	1.66643	0.333481	4
OsTN10g001292	-0.559243	0.728514	-0.969331	1.11996	-1.13756	0.817662	3
OsTN10g001296	-0.749098	0.0411149	-0.532212	-0.819717	1.85469	0.205227	4
OsTN10g001298	0.896456	-0.819276	0.737827	-1.0418	1.08027	-0.853485	8
OsTN10g001305	1.02509	-0.788091	-0.461179	-0.832669	1.49373	-0.436877	5
OsTN10g001315	-0.93248	1.37691	-0.852612	1.11343	-0.45071	-0.254538	7
OsTN10g001329	-0.663443	1.60558	-0.746038	0.693978	-0.968327	0.0782517	7
OsTN10g001330	-0.662041	1.58352	-0.731632	0.741436	-0.983088	0.0518024	7
OsTN10g001331	-0.93782	0.742282	-0.933153	1.37898	-0.743943	0.49365	3
OsTN10g001337	-0.202257	1.32304	-0.242255	0.957514	-1.44129	-0.394753	7
OsTN10g001340	-0.980587	0.605604	-0.875307	0.979351	-0.841695	1.11263	2
OsTN10g001347	-0.754965	1.19544	-0.924758	0.792648	-1.01149	0.703123	3
OsTN10g001356	1.88485	-0.655643	0.317252	-0.774713	-0.288738	-0.483002	6
OsTN10g001411	-1.12218	0.616044	-1.20684	0.593178	1.24031	-0.120514	2
OsTN10g001414	-0.94908	0.634259	-1.09165	0.941206	-0.636603	1.10187	2
OsTN10g001416	-0.517178	-0.511241	-0.243493	-0.407998	2.03041	-0.350498	4
OsTN10g001419	0.195873	-0.17204	1.09382	1.09434	-1.31998	-0.892005	1
OsTN10g001444	-1.37016	0.877151	-0.720515	1.01187	-0.52763	0.729288	3
OsTN10g001445	-1.25329	0.153409	-1.16894	0.675834	0.400409	1.19258	2
OsTN10g001446	0.0380848	-0.279857	-1.12394	1.87008	-0.379847	-0.124519	1
OsTN10g001464	0.0166865	-0.793156	-0.374915	-0.992178	1.76034	0.383226	4
OsTN10g001466	-0.307074	0.310637	1.57319	-0.0467143	-1.52712	-0.00291315	6
OsTN10g001467	-0.733622	0.700748	1.46322	-0.0576188	-1.35128	-0.0214493	7
OsTN10g001476	0.561057	-0.216934	0.362092	1.37682	-1.51157	-0.57146	1
OsTN10g001478	0.406876	0.0561191	-0.152878	1.49775	-1.58603	-0.221838	1
OsTN10g001479	0.463042	0.0554412	-0.164454	1.47063	-1.59352	-0.231133	1
OsTN10g001483	0.152694	-0.778256	0.102665	-0.851155	1.8472	-0.473143	4
OsTN10g001484	0.160379	0.642594	1.48993	-0.338511	-1.37536	-0.579029	6
OsTN10g001485	1.69878	-0.588101	0.608733	-0.187305	-0.458656	-1.07345	6
OsTN10g001489	0.58206	-0.852023	1.44896	-1.13491	0.50082	-0.544904	8
OsTN10g001495	0.2768	-0.108996	-0.274156	1.78773	-1.17748	-0.503895	1
OsTN10g001512	-0.144964	-0.812377	0.117937	-0.722192	1.91311	-0.351516	4
OsTN10g001518	0.92553	-0.676616	1.05313	-1.10765	0.718503	-0.912897	8
OsTN10g001521	0.22031	-0.768813	0.114881	-0.839243	1.82655	-0.553688	5
OsTN10g001522	0.200265	-0.824382	0.492752	-0.917726	1.67454	-0.625447	5
OsTN10g001523	0.238116	-0.851106	0.565893	-0.917933	1.62059	-0.655562	5
OsTN10g001524	0.43033	-0.999477	0.911745	-1.01806	1.2651	-0.589629	5
OsTN10g001525	1.29148	-0.606997	0.990751	-1.09086	0.265192	-0.849559	8
OsTN10g001527	-1.2272	0.888354	-0.862861	-0.320031	0.169254	1.35248	2
OsTN10g001533	0.155496	-0.645153	-0.235545	-0.681595	1.93831	-0.531512	4
OsTN10g001537	-0.964898	0.619424	-0.918284	1.11476	-0.816638	0.965635	3
OsTN10g001546	-0.236759	-0.732145	0.200358	-0.687944	1.91858	-0.462095	4
OsTN10g001547	1.32123	-0.656412	0.713611	-1.25742	0.541917	-0.66292	8
OsTN10g001550	-0.37073	1.1554	-0.774927	0.0956119	-1.25941	1.15405	3
OsTN10g001565	1.12465	-0.721272	1.22377	-0.915675	0.203616	-0.915091	8
OsTN10g001566	0.534144	-0.617744	0.663898	-1.16999	1.37872	-0.789036	5
OsTN10g001569	0.667396	0.636456	1.20381	-1.18326	-0.202179	-1.12222	6
OsTN10g001580	1.28995	-1.1153	0.349152	-1.13151	0.806469	-0.198765	8
OsTN10g001615	-0.652316	0.627717	-1.06542	0.94607	-0.962413	1.10636	3
OsTN10g001624	0.0425131	-0.662649	-0.391777	-0.723465	1.95774	-0.222363	4
OsTN10g001636	-1.02531	0.671331	-0.952758	1.07793	-0.722916	0.95172	3
OsTN10g001639	-1.2984	0.727266	-1.11767	0.796445	-0.0556199	0.947972	2
OsTN10g001643	0.331454	-0.70511	-0.757636	1.1634	-1.12622	1.09411	2
OsTN10g001645	-0.644617	0.866841	-0.919051	1.24961	-1.07454	0.521762	3
OsTN10g001654	-0.835831	1.46331	-0.778893	0.471423	-0.960002	0.639993	3
OsTN10g001655	-0.607207	-0.328778	-0.668533	0.653199	-0.788677	1.74	2
OsTN10g001663	1.42754	-0.76853	0.757614	-0.977845	0.390964	-0.829744	8
OsTN10g001667	-0.554339	-0.949854	1.3474	-0.742761	1.16347	-0.263912	5
OsTN10g001670	-1.33043	0.0673227	-0.953919	1.26551	0.114332	0.83718	2
OsTN10g001676	-0.271311	1.85971	-0.801211	-0.855819	-0.179177	0.247812	7
OsTN10g001690	-0.55419	0.486624	-1.04903	1.08353	-1.02775	1.0608	3
OsTN10g001702	-0.19515	-0.772161	-0.0482503	-0.700474	1.95353	-0.237497	4
OsTN10g001703	-0.625141	0.24835	-0.339533	1.89031	-0.878409	-0.295577	1
OsTN10g001704	-0.628746	0.254138	-0.337523	1.8819	-0.901458	-0.268312	1
OsTN10g001708	-0.49437	-0.136127	-0.848874	-0.669765	1.86782	0.281316	4
OsTN10g001709	-0.990198	0.217009	-1.09216	1.63348	-0.0895507	0.321421	3
OsTN10g001721	-0.96041	-0.0930261	-0.914313	0.886867	-0.424521	1.5054	2
OsTN10g001722	-1.29201	0.129003	-1.13053	0.463908	0.643702	1.18592	2
OsTN10g001723	-0.323523	0.0480397	-1.06269	1.35282	-0.990558	0.975904	3
OsTN10g001724	-0.692919	0.722027	-1.0167	1.25066	-0.958	0.694935	3
OsTN10g001727	-0.785372	0.368492	-1.06299	1.06545	-0.766549	1.18097	2
OsTN10g001728	-0.791827	0.365995	-1.06539	1.07194	-0.756545	1.17583	2
OsTN10g001734	-0.886205	0.10862	-0.895368	1.33919	-0.714035	1.0478	2
OsTN10g001737	0.80822	-0.296275	0.71121	-1.29638	1.05394	-0.98071	8
OsTN10g001738	-1.07066	0.813932	-0.867826	1.18913	-0.747122	0.68254	3
OsTN10g001741	0.909614	-0.47692	0.00171429	1.44283	-0.713461	-1.16377	1
OsTN10g001744	-0.0728583	-0.756287	-0.448904	-0.6056	1.96172	-0.0780745	4
OsTN10g001746	-0.901056	-0.153347	1.48406	0.98141	-0.746974	-0.664092	1
OsTN10g001752	-0.143123	-0.20692	-0.11047	-0.954159	1.93482	-0.520147	4
OsTN10g001753	-0.239365	2.03303	-0.482737	-0.461434	-0.387914	-0.46158	7
OsTN10g001754	-0.375763	2.04082	-0.404671	-0.400215	-0.429173	-0.430993	7
OsTN10g001759	-0.446813	-0.396889	2.04019	-0.392669	-0.442027	-0.36179	6
OsTN10g001760	0.413424	-0.773967	1.82246	-0.632877	-0.127732	-0.701311	6
OsTN10g001772	-0.961495	0.185135	-0.953384	1.29866	-0.606916	1.038	2
OsTN10g001774	-0.403495	-0.520153	-0.142624	-0.495971	2.02209	-0.459847	4
OsTN10g001781	-0.962478	0.767745	-1.04563	1.42574	-0.505567	0.320189	3
OsTN10g001785	-1.10161	0.508468	-0.0923222	1.36964	-1.18156	0.49739	3
OsTN10g001789	0.546303	-0.730337	1.66149	0.0435759	-1.11332	-0.407711	6
OsTN10g001795	-1.34278	-0.896228	-0.148481	0.847147	1.25374	0.286602	4
OsTN10g001798	-1.01857	0.426232	-1.07177	1.38139	-0.443431	0.72614	3
OsTN10g001806	0.442896	-0.914902	0.847079	-1.00383	1.3253	-0.696535	5
OsTN10g001807	-0.0881047	-0.704199	-0.0966377	-0.761457	1.95331	-0.302914	4
OsTN10g001808	1.72353	-0.604315	0.706836	-0.726585	-0.422634	-0.676829	6
OsTN10g001809	0.948774	-0.860953	1.1929	-1.03362	0.523238	-0.770339	8
OsTN10g001810	1.04854	-0.153911	0.994049	0.430844	-1.079	-1.24052	6
OsTN10g001815	0.764082	-0.783857	0.0334695	-1.14803	1.52615	-0.391818	5
OsTN10g001816	0.772452	-0.983363	0.543807	-0.867353	1.32682	-0.792362	5
OsTN10g001824	0.173694	-0.759242	-0.0246153	-0.759445	1.88441	-0.514801	4
OsTN10g001830	1.00478	-0.906278	0.940169	-0.793731	0.778958	-1.0239	8
OsTN10g001833	-0.481695	0.823454	-0.815881	1.2591	-1.26736	0.482388	3
OsTN10g001850	1.42196	-1.00082	1.01541	-0.794163	-0.0884723	-0.553916	6
OsTN10g001855	0.794837	0.638237	0.708035	0.414285	-1.17065	-1.38474	6
OsTN10g001856	1.02142	0.469947	0.699877	0.307405	-1.12703	-1.37161	6
OsTN10g001857	0.758396	-0.330234	1.61438	-0.296944	-0.651646	-1.09395	6
OsTN10g001858	0.341051	-0.705641	1.7538	0.19997	-0.854597	-0.734584	6
OsTN10g001860	0.790406	-0.904572	0.797137	-1.03811	1.12119	-0.766053	5
OsTN10g001862	-0.942423	1.11018	-0.965306	1.06693	-0.756343	0.486964	3
OsTN10g001866	-0.0602681	-0.70054	-0.176631	-0.498358	1.98188	-0.546082	4
OsTN10g001867	-1.09497	0.442788	-0.958745	0.868778	-0.538769	1.28092	2
OsTN10g001880	0.0172916	-0.410101	1.74204	-1.18808	0.350878	-0.512029	8
OsTN10g001884	-1.14409	0.705609	0.261288	1.37659	-1.10497	-0.0944219	1
OsTN10g001885	-1.25357	0.699857	0.25396	1.35814	-1.01377	-0.044624	1
OsTN10g001891	-0.807857	0.863107	-0.755949	1.51732	-0.85286	0.0362347	3
OsTN10g001898	-0.142854	-0.561129	-0.438646	-0.57114	2.01395	-0.300184	4
OsTN10g001902	-0.3506	0.187685	-0.82042	1.73601	-1.03656	0.283885	1
OsTN10g001903	-0.864737	1.38273	-0.757267	0.483572	-0.989083	0.744784	3
OsTN10g001904	-0.52222	1.68245	-0.831488	0.61537	-0.908469	-0.0356452	7
OsTN10g001914	0.921619	-0.709178	1.35314	-0.736627	0.267609	-1.09657	8
OsTN10g001916	-0.765483	0.336477	-0.876223	0.447496	-0.788702	1.64643	2
OsTN10g001917	-0.824758	0.262736	-0.83212	0.481594	-0.749962	1.66251	2
OsTN10g001919	1.01483	-0.666398	0.722247	-1.04231	0.964992	-0.993363	8
OsTN10g001927	2.00731	-0.507804	-0.339246	-0.20001	-0.700014	-0.260237	6
OsTN10g001928	0.116856	0.746421	-0.249829	0.942921	-1.84274	0.286369	1
OsTN10g001929	-0.0300499	0.752549	-0.337509	1.01097	-1.77558	0.379626	1
OsTN10g001930	-0.954815	-0.234824	0.172953	1.54799	-1.12177	0.590468	1
OsTN10g001934	-0.406375	1.56329	-0.774187	0.730162	-1.12179	0.0088945	7
OsTN10g001935	-0.678187	0.454924	-0.585833	1.83263	-0.743663	-0.279874	1
OsTN10g001939	-0.754708	1.06759	-0.589189	1.32203	-1.09251	0.0467868	3
OsTN10g001941	-0.701227	1.12595	-0.834937	1.13264	-1.06817	0.345733	3
OsTN10g001943	0.0171611	-0.658847	-0.088353	-0.700665	1.94893	-0.518226	4
OsTN10g001948	-0.597118	0.0509543	-0.559812	1.97227	-0.60977	-0.256522	1
OsTN10g001951	0.988674	-1.20129	0.748638	-0.5728	0.93768	-0.900899	8
OsTN10g001957	1.03007	-1.07343	-0.170506	-0.925498	1.36089	-0.221527	5
OsTN10g001958	1.2891	-1.08672	-0.104499	-0.927319	1.10117	-0.271732	5
OsTN10g001973	-0.842144	1.38268	-0.844465	0.80572	-0.918273	0.416481	3
OsTN10g001975	-0.864644	1.31266	-0.873978	0.9351	-0.871596	0.362454	3
OsTN10g001977	-0.55304	-0.693103	0.0185481	-0.362108	1.98201	-0.392311	4
OsTN10g001978	0.00274209	-0.558055	-0.597712	-0.760033	1.93728	-0.0242257	4
OsTN10g001980	0.952131	-0.706132	1.49805	-0.741437	-0.115075	-0.887532	6
OsTN10g001983	1.52558	-0.876005	0.822124	-0.872533	0.080222	-0.679391	8
OsTN10g001984	1.07797	-0.810116	1.21392	-1.06537	0.284934	-0.701343	8
OsTN10g001987	1.60425	0.137483	0.633987	-0.854181	-0.517476	-1.00406	6
OsTN10g002005	-0.140534	-0.235183	-1.18795	-0.678186	1.64094	0.600908	4
OsTN10g002006	-0.104671	-0.364377	-1.12118	-0.667515	1.67885	0.578897	4
OsTN10g002008	-0.200248	-0.207288	-0.74812	-0.622282	1.98201	-0.204073	4
OsTN10g002014	1.0413	-0.516234	1.21292	0.302642	-0.973744	-1.06689	6
OsTN10g002020	0.0526375	-0.65365	-0.310065	-0.656519	1.97	-0.4024	4
OsTN10g002021	0.0592622	-0.668057	-0.252736	-0.668496	1.96271	-0.43268	4
OsTN10g002025	-0.275123	1.56891	-0.194026	0.794444	-0.949689	-0.94452	7
OsTN10g002030	-0.104887	-0.555018	-0.437963	-0.556719	2.0127	-0.358113	4
OsTN10g002035	-0.880108	1.3247	-0.286666	1.16256	-0.947478	-0.373009	7
OsTN10g002040	0.923748	-0.467883	1.47378	-0.534741	-0.198991	-1.19591	6
OsTN10g002043	0.379708	-0.382305	1.79859	-0.938841	-0.7647	-0.0924541	6
OsTN10g002045	-0.812875	-0.501702	-0.313019	-0.210268	1.98111	-0.14325	4
OsTN10g002047	-0.680742	0.349064	-0.363338	1.83587	-0.932036	-0.208822	1
OsTN10g002048	-0.699772	0.288198	-0.495472	1.87973	-0.782406	-0.190282	1
OsTN10g002050	1.24339	-0.80102	0.846986	-0.923243	0.583614	-0.949727	8
OsTN10g002051	0.728495	-0.454179	1.57947	-0.932974	0.026363	-0.947179	6
OsTN10g002052	0.850176	-0.884819	1.2094	-0.933539	0.631414	-0.872627	8
OsTN10g002053	-0.346924	-0.471977	-0.281586	-0.469923	2.03494	-0.464529	4
OsTN10g002054	0.854248	1.45967	0.0246262	-0.834664	-0.357266	-1.14661	7
OsTN10g002068	-1.13117	0.512134	-0.755761	1.43409	-0.673319	0.614028	3
OsTN10g002075	-0.632565	0.621267	-0.737028	1.4638	-1.15524	0.439772	3
OsTN10g002076	-0.624107	0.62007	-0.737898	1.46878	-1.15716	0.430325	3
OsTN10g002079	0.856981	-0.942422	0.856117	-0.814557	1.01693	-0.973053	8
OsTN10g002087	0.843655	-0.953031	0.842535	-1.1237	1.0111	-0.62056	5
OsTN10g002088	0.412427	-0.966363	0.842356	-1.10004	1.31329	-0.501674	5
OsTN10g002092	1.47333	-0.896451	0.475137	-1.09095	0.571269	-0.532341	8
OsTN10g002096	-0.197385	-0.597195	-0.272634	-0.628447	2.00919	-0.313524	4
OsTN10g002097	-0.502622	1.30628	-0.11175	-0.0213009	-1.5192	0.848587	7
OsTN10g002106	-0.373351	-0.499956	-0.10654	-0.514825	2.01565	-0.520976	4
OsTN10g002109	1.04833	-0.595374	0.659413	-1.22674	0.951688	-0.837322	8
OsTN10g002111	-1.11879	0.511255	-1.00203	0.525632	-0.357779	1.44172	2
OsTN10g002115	-1.27719	0.0128002	-0.951298	0.803131	0.0655944	1.34697	2
OsTN10g002123	-0.750699	1.59654	-1.16855	0.640466	-0.333984	0.0162355	7
OsTN10g002125	-0.705237	1.13274	-0.683188	0.797092	-1.2634	0.721987	3
OsTN10g002136	0.990868	-0.373998	0.925161	-1.05958	0.703045	-1.18549	8
OsTN10g002143	-0.203694	-1.38553	-0.288458	0.10989	1.71486	0.0529343	4
OsTN10g002148	-1.02946	0.630224	-0.917669	1.01825	-0.750525	1.04918	2
OsTN10g002152	-0.934015	0.395508	-0.351532	1.61014	-1.06566	0.345557	1
OsTN10g002164	0.983446	-1.22164	-0.0486227	-1.11311	1.09942	0.300513	5
OsTN10g002171	0.590541	-0.697799	0.106502	-0.392711	1.59698	-1.20351	5
OsTN10g002176	1.35864	-0.828872	0.827524	-0.882572	0.429977	-0.904693	8
OsTN10g002177	-0.767426	0.22593	-0.922037	1.15053	-0.877219	1.19023	2
OsTN10g002179	-0.0176273	0.416289	0.303037	1.35563	-1.65337	-0.403959	1
OsTN10g002188	-0.0861887	-0.849809	-0.296299	-0.788298	1.88202	0.138578	4
OsTN10g002192	0.59485	-0.350723	1.73468	-1.01052	-0.374342	-0.593943	6
OsTN10g002193	-0.0179936	-0.427616	-0.24578	-0.762974	1.97552	-0.521157	4
OsTN10g002195	0.229956	0.870422	1.42223	-0.991597	-0.841241	-0.689774	6
OsTN10g002200	0.956498	-0.597323	1.42888	-0.957875	0.045605	-0.875789	6
OsTN10g002206	-0.461109	1.16215	-1.16039	0.788531	-1.00552	0.676338	3
OsTN10g002230	-0.655089	-0.948871	0.337657	0.226791	1.73729	-0.697774	4
OsTN10g002239	-0.0581061	-0.666498	-0.339099	-1.09631	0.408189	1.75183	4
OsTN11g000003	-0.555838	-0.145198	0.528242	1.76383	-0.711531	-0.879508	1
OsTN11g000008	0.0277976	-0.376166	0.118518	-0.301275	1.78409	-1.25297	4
OsTN11g000012	1.76893	-0.858896	0.265061	-1.02499	-0.0521222	-0.0979841	8
OsTN11g000021	-0.667288	-0.0619442	-0.366077	-0.808935	1.9394	-0.0351548	4
OsTN11g000025	0.299009	-0.515569	-0.490524	-1.01512	1.83339	-0.11119	4
OsTN11g000027	-1.4429	1.32825	-0.393612	0.930816	-0.358199	-0.0643529	7
OsTN11g000028	-0.634124	1.96997	-0.252674	-0.0767349	-0.768656	-0.237782	7
OsTN11g000034	-0.680929	1.02312	-0.0890923	1.23633	-1.3943	-0.0951345	1
OsTN11g000039	-0.174985	-0.638408	-0.297377	-0.49643	2.01509	-0.407885	4
OsTN11g000051	1.40976	-0.389205	0.221391	-1.16315	0.813844	-0.892646	8
OsTN11g000054	-0.968799	1.35216	-1.09279	0.71897	-0.515627	0.50609	3
OsTN11g000057	0.167987	-0.174537	0.918448	-1.60184	1.1493	-0.459358	5
OsTN11g000060	-1.07419	0.0621907	1.00254	-0.618881	1.37642	-0.748083	4
OsTN11g000062	0.745864	-0.940054	0.332071	-0.989388	1.45247	-0.600964	5
OsTN11g000063	0.784842	-0.946966	0.333017	-0.991882	1.42428	-0.603294	5
OsTN11g000075	0.345743	-0.870329	0.710512	-1.01061	1.4746	-0.649909	5
OsTN11g000087	-1.03684	0.38389	-1.11628	1.22839	-0.391511	0.932357	2
OsTN11g000093	0.439909	-0.652621	0.829472	-1.04147	1.33434	-0.909623	5
OsTN11g000095	1.20801	-0.843331	-0.499552	-0.999691	1.25174	-0.117171	5
OsTN11g000096	-0.0799534	-0.870201	-0.295454	-0.860984	1.8243	0.282288	4
OsTN11g000098	-0.0691438	-0.196515	0.00255907	-0.92459	1.897	-0.70931	4
OsTN11g000119	0.399802	0.260382	1.48353	0.110778	-1.22176	-1.03273	6
OsTN11g000120	0.369298	0.36169	1.45494	0.0888855	-1.23905	-1.03577	6
OsTN11g000123	-0.118721	-0.132181	-0.482121	-0.691214	1.98569	-0.561457	4
OsTN11g000124	0.0474983	0.611801	-0.053507	1.52896	-1.02113	-1.11362	1
OsTN11g000126	1.43248	0.250572	0.307233	-1.149	0.326592	-1.16788	8
OsTN11g000129	-0.184428	-0.59825	-0.660938	-0.521058	1.97475	-0.0100781	4
OsTN11g000130	-0.237883	0.67501	-0.669548	1.7099	-0.848796	-0.628688	1
OsTN11g000132	1.31331	-1.07822	0.744877	0.0201951	0.226983	-1.22714	8
OsTN11g000133	0.521977	0.772122	0.0347817	1.09323	-1.18203	-1.24009	1
OsTN11g000134	-0.122642	0.281928	-0.660131	1.86282	-0.870907	-0.491063	1
OsTN11g000137	1.61622	-0.611926	0.794619	-0.692767	-0.172117	-0.934029	6
OsTN11g000139	0.602663	-1.16502	0.415393	-0.963393	1.43904	-0.32868	5
OsTN11g000140	0.568939	-1.226	-0.034758	-0.644693	1.63347	-0.296953	5
OsTN11g000149	0.820544	-0.13723	0.324022	-1.16299	1.26909	-1.11344	5
OsTN11g000150	-0.442742	-0.334955	-0.414082	-0.364671	2.0384	-0.481947	4
OsTN11g000151	0.358037	-0.546971	0.615582	1.51249	-0.855719	-1.08342	1
OsTN11g000175	0.683555	-0.708494	0.14842	-0.959984	1.58815	-0.751646	5
OsTN11g000182	-0.868513	-0.947813	-0.702641	0.139238	1.1532	1.22653	4
OsTN11g000189	1.05448	-0.337207	0.568424	-1.74575	0.615901	-0.155842	8
OsTN11g000192	-0.879916	1.19486	0.333221	-1.38919	-0.120717	0.861742	7
OsTN11g000194	1.08306	-0.386608	0.386041	-1.20839	1.07793	-0.952029	8
OsTN11g000198	-0.304398	-0.491541	-0.412919	-0.473313	2.03615	-0.353979	4
OsTN11g000203	1.60617	-0.796493	0.595424	-0.726262	0.240842	-0.919682	8
OsTN11g000206	1.31435	-0.958282	0.973724	0.107919	-0.294084	-1.14363	6
OsTN11g000212	-1.07761	0.753893	-1.04947	1.33782	-0.417415	0.452778	3
OsTN11g000214	-0.0486861	1.91383	-0.570289	-0.0995444	-0.975395	-0.219912	7
OsTN11g000228	-0.559146	-0.183305	-0.927234	0.69144	-0.701974	1.68022	2
OsTN11g000230	-0.974432	-0.104805	-0.985253	0.545872	-0.140051	1.65867	2
OsTN11g000238	-1.02337	1.49567	-0.790033	0.590701	-0.730354	0.457383	7
OsTN11g000245	-0.957699	1.11834	-0.720948	1.22169	-0.878927	0.217545	3
OsTN11g000247	0.238952	1.54208	-0.918557	0.689277	-0.920951	-0.630797	7
OsTN11g000261	-0.685207	0.127829	-1.06754	0.972816	-0.726449	1.37855	2
OsTN11g000283	0.119335	0.276922	-0.548036	1.64354	-1.37629	-0.115473	1
OsTN11g000291	-0.836494	0.570316	-1.16348	1.05157	-0.660681	1.03876	2
OsTN11g000294	0.978407	-1.32715	0.259007	-0.873773	1.18412	-0.220611	5
OsTN11g000295	-0.888706	0.418561	-0.609352	1.23249	-1.1092	0.956207	3
OsTN11g000298	1.52702	-0.901638	0.0634847	-0.98406	0.795392	-0.5002	8
OsTN11g000303	-0.847121	1.06372	-0.835125	1.19577	-0.943216	0.365974	3
OsTN11g000306	1.28482	-0.61287	1.2181	-1.03429	-0.263602	-0.59215	6
OsTN11g000307	1.02574	-1.35259	-0.216864	-0.591126	1.30158	-0.166741	5
OsTN11g000311	0.723282	-1.20102	-0.308859	-0.945414	1.38815	0.343867	5
OsTN11g000325	-0.699259	0.249445	-0.683101	1.84644	-0.755691	0.0421666	1
OsTN11g000343	-0.816708	1.56347	-0.580253	0.905006	-0.817507	-0.254003	7
OsTN11g000347	0.535353	-0.791714	0.0330831	-0.962568	1.70104	-0.515192	5
OsTN11g000349	1.5665	0.0329564	0.64052	-0.9328	-0.200686	-1.10649	6
OsTN11g000355	1.02966	-0.953441	1.27277	-0.56291	0.233439	-1.01952	8
OsTN11g000370	-1.04081	0.652149	-0.974453	1.22512	-0.649128	0.787121	3
OsTN11g000371	-0.984235	0.348713	-1.07251	0.986216	-0.512669	1.23448	2
OsTN11g000373	0.977073	-0.961954	0.485295	-1.30684	1.0557	-0.24928	5
OsTN11g000374	0.458533	-0.859952	0.181496	-1.15884	1.61779	-0.239022	5
OsTN11g000376	1.32186	-0.856469	0.531063	-0.841131	0.793419	-0.94874	8
OsTN11g000380	-0.464513	0.0535906	0.751811	1.50199	-1.28343	-0.55945	1
OsTN11g000383	0.731361	-1.27964	0.337997	-1.08668	1.23647	0.0604911	5
OsTN11g000395	1.34181	-0.698128	0.821243	0.450525	-0.946318	-0.969136	6
OsTN11g000397	0.11191	-0.588252	-0.221395	-0.88459	1.9221	-0.339775	4
OsTN11g000398	-0.811296	0.521497	-0.84502	0.467923	-0.873709	1.5406	2
OsTN11g000410	1.66727	0.17165	0.431937	-0.473623	-0.611515	-1.18571	6
OsTN11g000415	1.1133	-0.355314	1.36305	-0.585375	-0.411025	-1.12464	6
OsTN11g000416	0.22254	-0.550748	-0.378709	-0.62609	1.93601	-0.603003	4
OsTN11g000418	0.921982	-0.922044	0.0771406	-0.846818	1.45269	-0.682951	5
OsTN11g000421	0.965527	-0.357384	0.208365	-1.25981	1.27314	-0.829839	5
OsTN11g000422	1.26794	-0.00138263	0.425573	-0.940214	0.635113	-1.38703	8
OsTN11g000424	-0.696727	0.765442	-0.736379	1.66945	-0.721763	-0.280022	1
OsTN11g000427	-0.554295	0.0589549	-0.00147156	1.87	-1.03983	-0.333356	1
OsTN11g000428	-0.297763	-0.000346212	-0.149468	1.89332	-1.08291	-0.362837	1
OsTN11g000431	1.08265	-0.388693	0.7309	-1.7567	0.193528	0.138309	8
OsTN11g000433	-0.392013	-0.586584	-0.425415	-0.579911	1.9962	-0.0122777	4
OsTN11g000434	-1.32594	0.635822	-1.0306	0.885907	-0.149235	0.984052	2
OsTN11g000439	1.2706	-0.565746	1.27769	-0.569701	-0.471441	-0.941394	6
OsTN11g000444	-0.968712	0.061779	-0.406821	1.68158	-0.889932	0.52211	1
OsTN11g000445	-0.95328	0.1389	-0.429493	1.65332	-0.936232	0.526785	1
OsTN11g000454	-0.655812	-0.180877	1.40338	1.08702	-0.923658	-0.730049	1
OsTN11g000463	-0.474504	0.701777	-0.64073	1.05962	-1.45008	0.803917	3
OsTN11g000470	0.542822	0.585874	-0.738438	0.25045	-1.65243	1.01172	3
OsTN11g000476	0.999216	-0.81061	0.506172	-1.17168	1.13336	-0.656462	5
OsTN11g000477	1.42173	-0.15842	0.715374	-1.12313	0.210361	-1.06591	8
OsTN11g000483	-0.666397	0.130568	-0.672689	1.85989	-0.781228	0.12986	1
OsTN11g000486	-0.871471	-0.776162	-0.609727	-0.258751	1.1277	1.38841	4
OsTN11g000496	-1.49001	1.17774	-0.598242	0.213894	-0.262642	0.959261	2
OsTN11g000500	-0.418337	1.05876	-0.78765	1.29687	-1.18347	0.033831	3
OsTN11g000511	-0.249134	-0.66433	0.0959311	-0.580812	1.95861	-0.560266	4
OsTN11g000518	1.22204	-0.688773	0.744225	-1.34217	0.613211	-0.548541	8
OsTN11g000525	1.53197	-0.266812	0.69045	-1.04041	0.0919097	-1.00711	6
OsTN11g000532	0.727238	0.390605	-1.06257	0.811203	-1.47152	0.605044	3
OsTN11g000543	-0.888443	1.09712	-0.854885	0.836544	-0.977847	0.787508	3
OsTN11g000546	-1.58492	0.0508806	0.684233	-0.695702	0.361082	1.18443	2
OsTN11g000556	1.41533	-0.294244	1.10541	-0.884216	-0.618023	-0.724254	6
OsTN11g000560	0.697925	-0.646052	0.167221	-0.865314	1.5701	-0.923883	5
OsTN11g000566	1.14672	-0.618295	1.11574	-1.09035	0.321282	-0.875092	8
OsTN11g000567	1.23617	-0.789483	0.452735	-1.03334	0.952073	-0.818162	8
OsTN11g000574	1.22383	-0.793336	0.719153	-0.92412	0.746373	-0.971904	8
OsTN11g000579	-0.421057	-0.464297	-0.121235	-0.527226	2.01954	-0.485725	4
OsTN11g000582	0.640652	-1.22256	0.505339	-0.984569	1.33901	-0.277874	5
OsTN11g000587	-0.411585	-0.582257	-0.800209	-0.737059	1.49439	1.03672	4
OsTN11g000600	-0.847835	1.13937	-0.812299	1.17334	-0.931898	0.279323	3
OsTN11g000609	0.340098	0.314266	1.65884	-0.362764	-0.9682	-0.982244	6
OsTN11g000620	-1.08604	1.18257	-0.570233	1.14686	-0.863381	0.190225	3
OsTN11g000623	-0.831544	1.64512	-0.848243	0.688171	-0.639384	-0.0141223	7
OsTN11g000644	-0.685209	0.83658	-1.3051	-0.438091	0.21778	1.37404	2
OsTN11g000645	-1.02631	1.11207	-1.10626	0.582099	-0.505796	0.944202	2
OsTN11g000660	1.37683	-1.5557	0.391991	-0.598823	0.413628	-0.0279236	8
OsTN11g000662	-0.914339	0.970573	-0.879685	0.837461	-0.941534	0.927523	3
OsTN11g000664	-0.899649	0.432797	0.507224	1.51281	-1.13103	-0.422149	1
OsTN11g000665	-0.751624	1.85285	0.447649	-0.499806	-0.552349	-0.496718	7
OsTN11g000671	0.168811	0.275105	-1.64936	0.851847	-0.656054	1.00965	2
OsTN11g000674	0.705907	-0.473534	0.986438	-1.76797	0.392718	0.156436	8
OsTN11g000679	-0.480062	2.02553	-0.248948	-0.457943	-0.271878	-0.566702	7
OsTN11g000684	-1.01284	0.263819	-0.621226	1.70611	-0.693022	0.35716	1
OsTN11g000709	0.676109	-0.908408	0.520637	-0.976957	1.40616	-0.717544	5
OsTN11g000712	0.69516	-1.68687	0.628717	-0.428846	1.01983	-0.227992	5
OsTN11g000736	-0.727339	0.645491	-0.746305	1.45935	-1.07994	0.448745	3
OsTN11g000737	-0.706186	0.616805	-0.779179	1.44176	-1.08371	0.51051	3
OsTN11g000752	-0.259778	-0.58694	-0.304648	-0.595465	2.01686	-0.270027	4
OsTN11g000753	-0.797832	1.39772	-0.78112	0.518155	-1.02708	0.690157	3
OsTN11g000754	-0.106224	-0.115581	1.98278	-0.658656	-0.51535	-0.586968	6
OsTN11g000755	-0.876345	1.66128	-0.324022	0.28874	-1.08292	0.333267	7
OsTN11g000758	-0.451457	-0.588226	0.475679	1.84487	-0.635803	-0.645065	1
OsTN11g000764	-0.703645	-0.0259818	1.37003	-1.49098	0.571018	0.279561	5
OsTN11g000771	-0.656323	-0.206107	-0.671039	1.90255	-0.625377	0.2563	1
OsTN11g000792	-0.669168	-0.200952	-0.745958	1.74121	-0.739229	0.614101	1
OsTN11g000793	1.68448	-0.647253	0.685878	-0.832006	-0.142321	-0.748779	6
OsTN11g000803	1.03212	-0.819378	0.961351	-0.879032	0.725088	-1.02015	8
OsTN11g000804	1.02734	-0.816217	0.963539	-0.886405	0.728419	-1.01668	8
OsTN11g000805	1.44766	-0.556613	0.814068	-0.87606	0.226024	-1.05508	8
OsTN11g000814	-0.457248	0.65919	-1.1864	1.25884	-0.951595	0.677214	3
OsTN11g000823	-0.00853579	-1.06067	0.0652465	-0.473917	1.86898	-0.391111	4
OsTN11g000839	1.11196	-0.560244	0.508515	-0.785247	0.988709	-1.26369	8
OsTN11g000877	-0.299709	1.97031	-0.623977	0.0750459	-0.605491	-0.516182	7
OsTN11g000881	-0.642909	0.086416	-0.808951	1.40186	-1.00789	0.971469	3
OsTN11g000887	-0.704609	1.24477	-0.807263	1.15875	-0.975999	0.0843478	3
OsTN11g000888	-0.709053	0.994289	-0.754764	1.35542	-1.03851	0.15262	3
OsTN11g000898	1.59491	-0.56827	0.597502	-1.11947	0.192513	-0.697179	8
OsTN11g000899	1.6084	-0.632373	0.385717	-1.08891	0.429907	-0.702733	8
OsTN11g000913	1.1597	0.305783	1.03427	-0.80598	-0.395335	-1.29845	6
OsTN11g000914	1.16172	0.300096	1.04099	-0.7623	-0.433857	-1.30665	6
OsTN11g000920	-0.72806	0.481358	-0.769714	1.58125	-0.98452	0.419689	3
OsTN11g000922	-0.633636	-0.290138	-0.972266	1.0218	-0.597966	1.4722	2
OsTN11g000924	-0.749685	-0.71408	-0.735156	-0.0353497	1.78436	0.449911	4
OsTN11g000926	-1.12547	-0.137077	-0.867069	1.12448	-0.269799	1.27493	2
OsTN11g000928	-0.856237	-0.768689	-0.643537	0.553087	-0.00390145	1.71928	2
OsTN11g000934	1.34423	-0.42878	0.610013	-1.29607	0.567568	-0.796959	8
OsTN11g000936	1.24035	0.084486	0.948799	-0.174917	-1.45014	-0.648578	6
OsTN11g000939	1.75471	-0.536223	0.181041	-0.928026	0.324735	-0.796238	8
OsTN11g000941	0.887834	-0.797855	0.397294	-0.838304	1.32725	-0.976215	5
OsTN11g000942	0.923427	-0.856239	0.357966	-0.893574	1.32458	-0.85616	5
OsTN11g000944	1.02706	-0.162889	0.700434	-1.1798	0.798065	-1.18287	8
OsTN11g000952	-0.0825481	-0.609798	-0.191819	-0.87257	1.9461	-0.189364	4
OsTN11g000958	-0.735266	1.85018	-0.912787	0.0743883	0.143925	-0.420444	7
OsTN11g000971	0.727132	-1.15839	0.559006	-1.10252	1.23781	-0.263039	5
OsTN11g000975	-0.38149	-0.976343	0.0853756	-0.532841	1.89775	-0.0924543	4
OsTN11g000984	0.0907675	-0.625281	-0.265523	-0.679246	1.95923	-0.479943	4
OsTN11g000992	1.74558	-0.565899	0.517099	-0.93943	-0.0656323	-0.691719	6
OsTN11g001010	-0.652425	0.507745	-0.968988	1.53611	-0.892665	0.470221	3
OsTN11g001016	-0.850805	1.27642	-0.259529	1.19199	-1.02291	-0.335161	1
OsTN11g001033	0.0911527	0.672159	-1.06429	-1.39719	0.930148	0.768024	4
OsTN11g001038	-0.94723	0.392074	-0.933859	0.815877	-0.708593	1.38173	2
OsTN11g001039	-0.860106	0.353964	-0.905905	1.25143	-0.851166	1.01179	2
OsTN11g001062	-0.288764	0.333606	-1.02749	0.821369	-1.15668	1.31796	2
OsTN11g001063	-0.975654	0.570668	-0.981343	1.04109	-0.726251	1.07149	2
OsTN11g001064	-0.87951	0.39039	-0.93279	1.31168	-0.804356	0.914583	3
OsTN11g001066	-1.0124	0.199713	-1.02864	0.806431	-0.402126	1.43702	2
OsTN11g001110	-0.481429	-0.413276	-0.837341	-0.568264	1.8312	0.469108	4
OsTN11g001112	-1.10783	0.912348	-0.906938	1.27287	-0.576684	0.406241	3
OsTN11g001119	-0.558489	-1.22354	-0.456544	-0.171628	1.04921	1.36099	4
OsTN11g001140	0.380702	-1.4057	-0.370674	-0.4747	1.55454	0.315833	4
OsTN11g001146	-0.0693549	-0.822594	0.97118	-0.745173	1.47278	-0.806835	5
OsTN11g001150	-0.352082	1.98049	-0.522351	0.0550412	-0.623944	-0.53715	7
OsTN11g001155	-0.675084	0.27773	-0.689858	1.0453	-1.18272	1.22463	2
OsTN11g001165	-0.659717	1.98237	-0.555854	-0.23885	-0.518531	-0.00941824	7
OsTN11g001201	-0.824739	1.06878	-0.492986	1.32594	-1.08457	0.00757631	3
OsTN11g001204	-0.276906	-0.646688	-0.174179	-0.942025	1.88794	0.151859	4
OsTN11g001206	-0.783602	0.804124	-0.695786	1.64567	-0.680324	-0.290086	1
OsTN11g001208	0.584036	1.1712	-0.114748	-1.10866	0.709658	-1.24149	8
OsTN11g001232	0.334312	0.0329287	-0.430072	-1.33878	1.68254	-0.280921	4
OsTN11g001233	0.225228	0.0720423	-0.517507	-1.28418	1.72573	-0.221313	4
OsTN11g001247	-0.892445	-0.85369	0.384881	1.11891	1.13243	-0.890089	4
OsTN11g001248	-0.880426	-0.805933	0.257347	0.978614	1.33199	-0.881593	4
OsTN11g001259	-0.607544	1.03313	-0.854057	0.0987183	-1.01199	1.34173	2
OsTN11g001262	-0.335773	-0.644258	-0.202712	-0.50981	2.01649	-0.323941	4
OsTN11g001275	-0.455743	-0.628	-0.484999	-0.640343	1.91467	0.294413	4
OsTN11g001287	-0.90528	0.339599	-1.15943	1.05624	-0.496691	1.16556	2
OsTN11g001290	-0.152275	-0.914643	1.08857	-0.969227	1.35892	-0.411341	5
OsTN11g001314	1.12536	-0.470878	1.18886	0.171316	-0.866447	-1.14821	6
OsTN11g001333	0.103085	-0.564562	-0.611429	-0.333297	1.96742	-0.561218	4
OsTN11g001348	-0.31628	-1.79183	0.0682667	0.24715	0.804933	0.987757	4
OsTN11g001354	-0.358041	-1.50294	-0.460785	0.14078	1.05521	1.12577	4
OsTN11g001358	-0.878166	0.0421013	-0.869327	0.743472	-0.627175	1.5891	2
OsTN11g001360	1.06944	-0.705365	0.314808	-1.00105	1.21124	-0.889074	5
OsTN11g001363	1.4963	-0.0469636	0.743848	-0.838367	-0.136589	-1.21822	6
OsTN11g001370	-0.954852	0.287636	-1.00767	0.975196	-0.597342	1.29703	2
OsTN11g001371	-0.957974	0.301108	-1.0058	0.962707	-0.60086	1.30082	2
OsTN11g001384	-0.0783116	-0.564628	-0.31905	-0.569642	2.00594	-0.474311	4
OsTN11g001402	-0.0280769	-0.761691	-0.140821	-0.849369	1.91312	-0.133167	4
OsTN11g001403	-0.0255472	-0.763335	-0.139476	-0.853015	1.91121	-0.129837	4
OsTN11g001404	-0.215636	-0.602474	0.378985	-0.862631	1.84576	-0.544003	4
OsTN11g001418	-0.200316	-0.870925	0.181758	-0.930742	1.81715	0.00307323	4
OsTN11g001421	0.0059306	-0.660201	-0.575585	-0.718638	1.92767	0.0208182	4
OsTN11g001422	-0.363966	-0.561606	2.01771	-0.597265	-0.217572	-0.277304	6
OsTN11g001430	-0.396028	-0.439721	2.04002	-0.447228	-0.350668	-0.406376	6
OsTN11g001432	-0.415323	-0.476356	2.02621	-0.567179	-0.20491	-0.362447	6
OsTN11g001438	1.2836	-0.596846	0.616032	-0.777767	0.705454	-1.23047	8
OsTN11g001439	1.13438	-1.24529	0.938125	-0.538807	0.545169	-0.833567	8
OsTN11g001447	1.72326	0.303308	0.147796	-0.248623	-0.978623	-0.947115	6
OsTN11g001448	1.60663	0.538854	0.139848	-0.268758	-1.04883	-0.967752	6
OsTN11g001455	-0.301323	-0.527247	-0.458409	-0.539284	2.02278	-0.196515	4
OsTN11g001456	-0.291789	-0.515968	-0.454665	-0.518967	2.02778	-0.246389	4
OsTN11g001467	-0.190139	-0.658223	-0.405022	-0.735758	1.95552	0.0336177	4
OsTN11g001473	-0.91576	-0.630202	-1.00987	0.310549	0.870344	1.37494	2
OsTN11g001486	-0.703622	1.70608	-0.717613	-0.00761729	-0.859984	0.582754	7
OsTN11g001488	-0.662184	-0.683116	-0.498472	1.38588	-0.725228	1.18312	2
OsTN11g001504	-0.865199	0.248441	-0.992794	1.16619	-0.712606	1.15597	2
OsTN11g001505	-0.125123	-1.03883	0.464891	-0.718837	1.74989	-0.331993	5
OsTN11g001506	-0.44314	-0.496472	-0.109735	-0.526673	2.01801	-0.441989	4
OsTN11g001508	0.0684975	0.258916	-1.2423	-0.836539	1.63447	0.116962	4
OsTN11g001509	-1.0088	0.785254	-0.842894	1.04386	-0.873398	0.895969	3
OsTN11g001510	-0.719211	0.841895	-0.652881	1.57202	-0.929422	-0.112398	1
OsTN11g001511	0.54718	-0.186651	-1.33774	-0.791533	1.4698	0.29894	4
OsTN11g001512	0.76679	0.413968	-0.467888	1.15459	-1.6211	-0.246362	1
OsTN11g001513	-0.826033	0.673914	-0.893	1.07542	-0.992155	0.961856	3
OsTN11g001530	1.63256	-0.492949	0.864744	-0.722637	-0.627791	-0.653931	6
OsTN11g001535	1.36088	-0.29973	1.09092	-0.373508	-1.16029	-0.618279	6
OsTN11g001542	0.412705	-0.920903	1.37632	0.810801	-0.738113	-0.940815	6
OsTN11g001546	-0.240159	0.891336	-0.881973	1.09678	-1.37958	0.513596	3
OsTN11g001549	0.441408	1.69544	-0.450708	-0.192796	-1.283	-0.210339	7
OsTN11g001554	-1.23283	-0.212027	-0.736452	1.20418	-0.206187	1.18331	2
OsTN11g001557	0.0654194	-0.779472	0.405047	-0.786491	1.77361	-0.67811	5
OsTN11g001561	1.20386	-0.456027	1.158	-1.17009	0.0576039	-0.793339	8
OsTN11g001562	1.16834	-0.839469	1.15982	-1.10511	0.189159	-0.572743	8
OsTN11g001578	-0.362113	-0.579687	-0.0525509	-0.576527	2.00279	-0.431908	4
OsTN11g001579	-0.342205	-0.581182	-0.0492908	-0.589736	2.0007	-0.438288	4
OsTN11g001581	-1.09272	0.305968	-0.984796	0.51874	-0.292469	1.54528	2
OsTN11g001585	-0.13412	-0.398134	1.99086	-0.630413	-0.169548	-0.658645	6
OsTN11g001587	-1.53944	0.800454	-0.820597	0.681345	-0.0436402	0.921883	2
OsTN11g001588	-1.50473	1.09284	-0.827901	0.16956	0.178301	0.891926	2
OsTN11g001610	-0.725387	1.5828	-0.749614	0.88018	-0.762211	-0.225763	7
OsTN11g001628	-0.572027	1.71315	-0.587787	0.713408	-0.834794	-0.431949	7
OsTN11g001635	1.37833	-0.51959	-0.252431	-0.939967	1.12268	-0.789024	5
OsTN11g001637	-0.776329	0.496748	-1.1393	1.40567	-0.655427	0.668636	3
OsTN11g001640	-0.922666	0.664224	-0.906072	1.44566	-0.755828	0.474684	3
OsTN11g001641	-0.784147	1.52711	-1.14854	0.375523	-0.529234	0.559292	7
OsTN11g001643	0.826186	-1.72587	0.57078	0.182585	0.769204	-0.622885	8
OsTN11g001644	-0.747408	-0.424931	-0.695335	0.944801	-0.647353	1.57023	2
OsTN11g001645	-0.817893	-0.276579	-0.656746	0.80078	-0.693183	1.64362	2
OsTN11g001660	-0.176621	-1.42624	0.149601	-0.459053	1.61686	0.295456	4
OsTN11g001665	0.970452	-1.15911	1.00841	-0.676271	0.712525	-0.856009	8
OsTN11g001666	1.10094	-1.1267	0.882461	-0.702284	0.708486	-0.862903	8
OsTN11g001669	1.70928	-0.393804	0.483477	-1.12476	-0.0231106	-0.651086	6
OsTN11g001671	-0.0451453	0.466697	0.124208	1.48994	-1.50403	-0.53167	1
OsTN11g001678	-1.12674	0.392563	-0.298045	1.52438	-0.968119	0.475958	3
OsTN11g001691	-0.219337	-0.982142	-0.110921	-0.723671	1.84824	0.187826	4
OsTN11g001694	-0.85994	-0.344038	-0.948268	0.286566	0.0900979	1.77558	2
OsTN11g001709	-0.258794	0.175307	-0.76462	0.441286	1.62471	-1.21789	4
OsTN11g001715	-0.868083	0.616518	-0.514049	1.62423	-0.974902	0.116284	1
OsTN11g001717	-0.438268	-0.530818	-0.170192	-0.392311	2.02484	-0.493252	4
OsTN11g001730	0.364293	-0.782877	0.972458	-0.921949	1.27742	-0.909349	5
OsTN11g001759	0.0676541	-0.684544	-0.532746	-0.729458	1.9258	-0.0467092	4
OsTN11g001760	-0.636316	-0.577283	-0.630328	-0.476483	1.84772	0.472694	4
OsTN11g001770	1.06666	-0.737318	0.929973	-0.649718	0.655884	-1.26548	8
OsTN11g001772	-0.716944	1.14742	-0.848113	1.20215	-0.98269	0.198175	3
OsTN11g001779	-0.36662	-0.465375	-0.281061	-0.468656	2.03574	-0.454029	4
OsTN11g001780	1.42831	-0.638771	0.873229	-0.995689	0.202882	-0.869958	8
OsTN11g001785	1.39599	-0.934835	0.866503	-0.813549	0.305282	-0.819392	8
OsTN11g001789	-1.03157	-0.137473	-1.23737	0.260373	0.985386	1.16065	2
OsTN11g001796	1.41943	-0.45441	0.396706	-0.979834	0.700222	-1.08211	8
OsTN11g001808	1.27802	-0.895067	0.466359	-0.998787	0.893051	-0.743578	8
OsTN11g001817	0.730729	-0.857732	1.49643	-0.942049	0.292393	-0.719774	8
OsTN11g001822	-0.49677	0.964716	-1.20511	0.842179	-0.962313	0.857293	3
OsTN11g001824	1.56296	-1.35877	0.141504	-0.61397	0.506926	-0.23865	8
OsTN11g001826	-0.973273	0.221324	-1.01142	0.727973	-0.460769	1.49617	2
OsTN11g001849	-0.378624	-0.639753	-0.540532	-0.614446	1.92808	0.245277	4
OsTN11g001854	-0.461427	-0.244091	-0.550766	2.02858	-0.459591	-0.312708	1
OsTN11g001855	-0.511051	-0.0988686	-0.445481	2.01599	-0.530358	-0.430232	1
OsTN11g001900	-0.881043	0.403483	-0.880625	0.888476	-0.857336	1.32705	2
OsTN11g001901	-0.829371	-0.994686	-0.776318	1.25112	0.324964	1.0243	2
OsTN11g001914	0.112346	-0.749564	-0.702301	-0.752753	1.81323	0.279042	4
OsTN11g001917	0.924088	-1.11542	-0.513209	1.43254	-0.764837	0.0368364	1
OsTN11g001931	-0.817167	0.341862	-0.786951	1.40328	-0.96966	0.828631	3
OsTN11g001973	-0.473342	0.417152	-0.970377	1.26689	-1.12674	0.886416	3
OsTN11g001983	-0.878226	1.48965	-0.271296	0.898048	-1.04513	-0.193048	7
OsTN11g001999	1.43265	-1.10181	0.887378	-0.640869	0.140699	-0.71805	8
OsTN11g002005	1.72419	-0.75708	0.51191	-0.764228	0.0623916	-0.777182	8
OsTN11g002013	-0.34488	1.91185	-0.572298	0.240134	-0.8153	-0.419506	7
OsTN11g002019	1.03198	-0.776804	1.43591	-0.596525	-0.150508	-0.944059	6
OsTN11g002020	0.932238	-0.746944	1.53461	-0.666583	-0.195838	-0.857486	6
OsTN11g002026	-0.70372	1.92757	-0.309036	0.0472379	-0.819217	-0.142835	7
OsTN11g002027	-1.07869	1.56223	-0.57947	0.561874	-0.796809	0.330861	7
OsTN11g002029	-1.08603	0.552941	-1.38928	0.756276	0.175081	0.991009	2
OsTN11g002031	0.420767	-0.905288	0.299802	-0.880685	1.66636	-0.600959	5
OsTN11g002054	-0.905535	0.316845	-0.883271	1.3235	-0.802347	0.950805	3
OsTN11g002065	-0.553218	-0.466544	-0.940412	0.670892	-0.43023	1.71951	2
OsTN11g002071	-0.435507	-0.672636	-0.684618	-0.0432885	-0.131208	1.96726	2
OsTN11g002072	-0.433142	-0.667748	-0.680979	-0.0373822	-0.150218	1.96947	2
OsTN11g002073	1.29253	-0.160271	0.805059	-1.49518	0.18033	-0.622471	8
OsTN11g002079	-0.798634	1.58814	-0.5484	0.861853	-0.85825	-0.244706	7
OsTN11g002081	1.42505	-1.43591	0.0570847	-0.758271	0.55054	0.161504	8
OsTN11g002093	0.361053	-0.834783	0.735988	-0.357411	1.37023	-1.27508	5
OsTN11g002097	1.0112	-0.798853	0.815834	-0.968214	0.901278	-0.961244	8
OsTN11g002109	0.601254	-1.29445	0.0907779	-1.0391	1.33439	0.307136	5
OsTN11g002117	-0.674409	1.01714	-0.721626	1.33804	-1.08766	0.128514	3
OsTN11g002118	-0.671003	1.00252	-0.723565	1.34849	-1.08869	0.132246	3
OsTN11g002120	-0.397819	-0.354036	-0.493517	2.03155	-0.528381	-0.257797	1
OsTN11g002122	-0.235613	-0.460774	-0.354436	2.0309	-0.460545	-0.519528	1
OsTN11g002144	-0.196168	-0.905861	-0.669945	-0.652149	0.80671	1.61741	4
OsTN11g002146	-0.589601	-0.116981	-0.401317	2.01044	-0.570596	-0.331944	1
OsTN11g002153	0.673733	-1.8694	0.968177	0.322997	0.0031771	-0.0986876	6
OsTN11g002162	-0.613421	-0.689699	0.430489	-0.346428	1.85445	-0.635389	4
OsTN11g002168	-0.691491	-0.462835	-0.802791	-0.0394232	1.91165	0.0848937	4
OsTN11g002177	-1.04359	0.775686	-0.0668468	1.50908	-0.998202	-0.176126	1
OsTN11g002178	-0.911803	0.330307	-0.83808	1.17344	-0.864323	1.11046	2
OsTN11g002179	-0.917671	0.278922	-0.834881	1.23446	-0.837118	1.07628	2
OsTN11g002180	1.37726	-0.747888	0.0475801	-1.04034	1.01632	-0.652932	8
OsTN11g002191	0.548728	-0.191483	0.950358	0.978669	-1.44952	-0.836755	1
OsTN11g002195	-0.619033	0.310717	-0.940471	1.09471	-1.02421	1.17829	2
OsTN11g002198	-0.732696	0.683526	-0.89102	1.03204	-1.07857	0.986719	3
OsTN11g002199	-0.753329	0.693853	-0.884726	0.993227	-1.06869	1.01967	3
OsTN11g002200	1.23037	-0.893931	0.966809	-0.76827	0.446314	-0.98129	8
OsTN11g002202	0.987475	-1.22249	0.206837	-0.769262	1.28695	-0.489516	5
OsTN11g002207	-0.675265	0.625681	-0.452935	1.65892	-1.09139	-0.0650158	1
OsTN11g002228	-0.110046	-0.455498	-1.36924	-0.342033	0.824812	1.452	2
OsTN11g002233	0.675891	0.514588	-0.201796	1.05166	-1.7448	-0.295539	1
OsTN11g002235	1.26008	-0.901209	0.56873	-1.32903	0.664217	-0.262789	8
OsTN11g002238	-0.360156	-0.275221	2.0229	-0.594574	-0.265105	-0.527843	6
OsTN11g002247	0.903112	-0.753648	1.48139	-0.677275	0.0274534	-0.981034	6
OsTN11g002263	0.280404	-1.0553	-0.143204	-1.13337	1.47206	0.579419	4
OsTN11g002264	-0.754839	-0.027309	-0.769432	-0.343668	1.92828	-0.0330274	4
OsTN11g002284	-0.446173	-0.444181	-0.447817	-0.439203	2.03557	-0.258193	4
OsTN11g002285	-0.435386	-1.15847	1.05824	-0.98512	1.09334	0.427401	5
OsTN11g002288	-0.432733	-0.474375	-0.466423	-0.487982	2.02607	-0.164555	4
OsTN11g002291	0.500669	1.47402	-1.3323	-0.65765	0.437141	-0.42188	7
OsTN11g002296	0.101632	-1.10076	0.441065	-1.33459	1.02127	0.871386	5
OsTN11g002301	0.666031	-1.68147	-0.354715	-0.342232	0.956173	0.756212	5
OsTN11g002315	0.873873	1.006	0.170585	0.381121	-0.999376	-1.4322	7
OsTN11g002344	-0.509411	1.15252	-0.647585	-0.952144	1.38072	-0.424101	4
OsTN11g002366	0.0697527	-0.624341	1.09739	-1.43308	1.13473	-0.244443	5
OsTN11g002372	1.7932	-0.746675	0.545928	-0.556304	-0.314851	-0.721298	6
OsTN11g002378	0.538736	-0.95843	0.886747	-1.14177	1.19573	-0.521014	5
OsTN11g002379	1.74223	-0.833114	0.322418	-0.619607	0.239674	-0.851605	8
OsTN11g002388	-0.300724	-0.868443	-0.596896	1.94487	-0.106185	-0.0726276	1
OsTN11g002391	-0.667467	1.13261	-0.530835	1.35178	-1.05266	-0.233436	1
OsTN11g002395	-0.359841	-0.483619	-0.323056	-0.49154	2.03652	-0.378464	4
OsTN11g002405	1.11896	-0.85712	0.00275398	-0.861929	1.32139	-0.724059	5
OsTN11g002407	1.09123	-0.81834	0.139389	-0.89981	1.29058	-0.80304	5
OsTN11g002410	-0.623726	-0.014938	-0.567847	1.74332	-1.01172	0.474912	1
OsTN11g002411	-0.769908	1.35381	-0.85276	1.1536	-0.692413	-0.192335	3
OsTN11g002416	-0.632439	0.00328039	-0.584362	1.78173	-0.963277	0.395074	1
OsTN11g002420	-0.698556	-0.51	-0.157383	1.99875	-0.442762	-0.190048	1
OsTN11g002423	-0.850727	-0.134656	-0.675422	1.61445	-0.749612	0.795963	3
OsTN11g002425	0.618697	-0.955848	0.484694	-0.871172	1.46813	-0.744505	5
OsTN11g002426	-0.0462744	-1.82358	1.15217	-0.0491373	0.539118	0.227708	5
OsTN11g002429	-0.6167	0.15039	-0.90701	1.36337	-0.97369	0.983643	3
OsTN11g002430	-0.617049	1.14135	-0.704659	1.36878	-0.940832	-0.24759	1
OsTN11g002432	-0.841213	1.29257	-0.426835	1.10799	-1.10034	-0.0321747	3
OsTN11g002435	-0.534547	1.79703	-0.385439	0.367803	-1.0841	-0.160741	7
OsTN11g002439	-0.26308	-0.574913	-0.15873	-0.542836	2.01382	-0.474262	4
OsTN11g002440	-0.79908	-0.571023	-0.870412	0.338413	1.77393	0.128169	4
OsTN11g002443	-0.792397	-0.644124	-0.577382	-0.517202	1.54223	0.988877	4
OsTN11g002461	-1.50135	1.19413	0.179388	0.964195	-0.483024	-0.353338	7
OsTN11g002482	1.42832	-0.903001	0.309481	-1.16907	0.726651	-0.39238	8
OsTN11g002513	0.994429	-0.440824	0.395411	-1.00928	1.17904	-1.11878	8
OsTN11g002515	0.726299	-0.219351	1.06261	0.756854	-1.25349	-1.07292	6
OsTN11g002518	-0.518918	1.46177	-1.01639	0.747099	-0.959637	0.28607	7
OsTN11g002523	-0.337716	1.49849	-0.799538	1.01971	-0.753326	-0.62762	7
OsTN11g002528	-0.428373	1.9479	-0.347038	0.1529	-0.658177	-0.667211	7
OsTN11g002540	-0.445585	-0.610701	-0.297576	1.98036	-0.646316	0.0198171	1
OsTN11g002554	-0.143281	-0.726514	0.347393	-0.489807	1.84378	-0.831575	4
OsTN11g002570	-0.31966	-0.17575	-0.0715129	-0.52853	1.95884	-0.863384	4
OsTN11g002578	-0.890296	-0.359001	-0.733898	1.05658	-0.535244	1.46186	2
OsTN11g002579	-0.729292	-0.5201	-1.07994	1.66126	0.178424	0.489647	2
OsTN11g002580	-0.725456	1.24036	-0.698297	1.29431	-0.834106	-0.276813	1
OsTN11g002586	1.38877	0.334178	-0.235724	0.693872	-0.942188	-1.23891	6
OsTN11g002595	-0.488702	0.424679	0.655931	1.33742	-1.46502	-0.46431	1
OsTN11g002601	-0.408889	1.17511	-0.887043	0.851428	-1.27998	0.549374	3
OsTN11g002603	-0.0777466	1.3652	-1.21134	0.918826	-0.899748	-0.0951858	7
OsTN11g002605	-1.05825	-0.183711	-1.01653	0.432971	0.220197	1.60533	2
OsTN11g002608	-0.114316	-0.554937	-0.658422	-0.459787	1.99748	-0.210022	4
OsTN11g002610	1.34054	-0.785232	0.812926	-1.0446	0.463461	-0.787096	8
OsTN11g002614	0.692609	-1.11812	1.187	-0.847264	0.79774	-0.711962	8
OsTN11g002620	-0.5901	-0.125602	-0.574879	-0.570727	1.99074	-0.129432	4
OsTN12g000003	-0.771315	1.43374	-0.505952	1.11858	-0.758699	-0.516357	7
OsTN12g000008	-0.972905	0.873835	-0.969638	1.48305	-0.386596	-0.0277468	3
OsTN12g000016	-0.37947	1.82444	-1.22442	0.0117226	-0.0927982	-0.139476	7
OsTN12g000032	-0.678292	0.0462794	-1.04609	0.664965	-0.608799	1.62193	2
OsTN12g000037	1.39325	-0.939176	1.07306	-0.659207	-0.106766	-0.761168	6
OsTN12g000043	1.60567	-0.791826	0.564331	-0.822291	0.290266	-0.846145	8
OsTN12g000045	1.54776	-0.799917	0.597876	-0.852567	0.369313	-0.862466	8
OsTN12g000047	-0.742414	1.03974	-0.661117	1.16005	-1.19436	0.398099	3
OsTN12g000050	0.494217	-0.414586	1.41208	-1.2465	0.586653	-0.831862	8
OsTN12g000053	-0.895525	-0.109041	1.20774	-0.63113	1.27172	-0.843757	5
OsTN12g000054	0.162437	-0.957071	0.0785856	-1.24436	1.51939	0.441018	5
OsTN12g000055	0.692564	-0.994767	0.348717	-1.01927	1.46033	-0.487567	5
OsTN12g000058	-0.893275	-0.408932	-1.12668	0.210824	0.74772	1.47034	2
OsTN12g000068	0.274102	-0.81406	0.410237	-0.931554	1.68453	-0.623254	5
OsTN12g000069	0.336861	-0.862661	0.365436	-0.923704	1.67516	-0.591095	5
OsTN12g000070	0.347141	-0.89356	0.181446	-0.82186	1.74849	-0.561655	5
OsTN12g000083	-0.91976	-0.0383301	-1.11807	1.41109	-0.254904	0.91997	2
OsTN12g000111	0.505109	0.272273	1.39478	0.125011	-1.33726	-0.959907	6
OsTN12g000115	-0.0542274	-0.369647	-0.602287	-0.412632	2.00243	-0.563635	4
OsTN12g000116	-0.169171	0.495875	-0.251877	1.73716	-0.869479	-0.942509	1
OsTN12g000118	-0.541191	0.145617	-0.865934	1.81071	-0.777885	0.228686	1
OsTN12g000120	1.56357	-0.821555	0.630452	-0.819395	0.29725	-0.850325	8
OsTN12g000123	-0.512286	0.489098	-0.63597	1.82518	-0.786474	-0.37955	1
OsTN12g000129	-0.373976	-0.300937	-0.410715	2.03218	-0.365693	-0.580861	1
OsTN12g000130	-0.945558	0.218664	-1.36173	0.416252	1.39838	0.273996	4
OsTN12g000135	1.43721	-0.931731	0.993245	-0.434743	-0.129024	-0.934952	6
OsTN12g000140	-0.737032	-0.831431	-0.451661	0.167738	-0.0271445	1.87953	2
OsTN12g000144	-1.13299	1.60503	-0.807959	0.0132731	-0.305139	0.627788	7
OsTN12g000148	-0.469291	2.02579	-0.345363	-0.192519	-0.529195	-0.489425	7
OsTN12g000149	-0.828007	1.96977	-0.418917	-0.471506	-0.175697	-0.0756465	7
OsTN12g000164	-1.21856	0.0285853	-0.0837253	1.58941	-0.840204	0.524495	1
OsTN12g000168	-1.00079	1.29867	-1.09542	0.412309	-0.46607	0.851298	3
OsTN12g000171	0.47569	-0.663443	0.0581976	-1.05653	1.71343	-0.527339	5
OsTN12g000185	-0.795331	0.93978	-1.14418	1.17284	-0.712879	0.539772	3
OsTN12g000186	-0.734057	0.560998	-1.00768	1.22223	-0.925261	0.88377	3
OsTN12g000189	0.931689	-1.01209	1.07366	-1.15459	0.632386	-0.471053	8
OsTN12g000190	-1.06745	0.757916	-0.150225	1.61082	-0.631897	-0.519165	1
OsTN12g000192	1.17643	-0.47534	0.5817	-1.08839	0.864099	-1.0585	8
OsTN12g000193	1.31456	-0.170273	0.416565	-1.11572	0.706281	-1.15141	8
OsTN12g000194	1.33655	-0.101796	0.424524	-1.11686	0.631167	-1.17359	8
OsTN12g000195	-0.40489	1.03521	-0.798215	1.3416	-1.15191	-0.0217856	3
OsTN12g000199	-0.290981	-0.461865	-0.460129	-0.47201	2.03579	-0.350803	4
OsTN12g000203	1.35828	-1.08193	0.284178	-0.866996	0.896572	-0.590101	8
OsTN12g000206	1.42747	-0.127594	0.920565	-0.754052	-0.256296	-1.21009	6
OsTN12g000208	-0.142409	-0.559509	-0.264056	2.01173	-0.562083	-0.483675	1
OsTN12g000209	0.746448	-1.89872	6.92449228796684e-05	0.464972	0.782549	-0.0953151	5
OsTN12g000212	-0.976649	0.551395	-1.01194	1.47254	-0.541652	0.506301	3
OsTN12g000219	0.411139	0.0851602	1.76351	-0.735755	-0.83634	-0.687713	6
OsTN12g000223	-1.09263	0.0994296	-1.0717	0.788692	-0.140141	1.41635	2
OsTN12g000237	-0.78816	0.681907	-0.776676	1.61464	-0.832669	0.100962	1
OsTN12g000238	-0.777598	0.609024	-0.858108	1.65865	-0.726641	0.0946763	1
OsTN12g000241	-0.700448	1.12584	-0.833192	1.24343	-0.988952	0.153326	3
OsTN12g000242	-0.916576	1.39367	-0.770235	0.985144	-0.80117	0.109163	3
OsTN12g000243	-0.956569	1.50856	-0.86485	0.754727	-0.664799	0.222936	7
OsTN12g000248	-0.942097	0.60971	-0.580346	1.5104	-0.985854	0.388189	3
OsTN12g000249	-0.908153	0.654647	-0.969716	1.06075	-0.831988	0.994457	3
OsTN12g000250	-0.919323	0.607705	-0.934244	1.09621	-0.847088	0.996738	3
OsTN12g000282	-0.00860047	0.515503	-0.751672	1.73315	-0.914089	-0.57429	1
OsTN12g000289	-0.244023	0.933472	-1.44596	1.12029	-0.755074	0.391293	3
OsTN12g000291	-1.26145	0.63198	-1.0929	0.821636	-0.155517	1.05625	2
OsTN12g000294	-0.513705	-0.377932	-0.677595	1.95486	0.152365	-0.537994	1
OsTN12g000298	-0.596464	1.20262	-1.08898	0.956392	-0.93865	0.465085	3
OsTN12g000299	-0.583737	-0.694804	-0.604013	-0.606898	1.65985	0.8296	4
OsTN12g000308	0.139255	-0.886408	-0.610061	-0.818559	1.71466	0.461118	4
OsTN12g000316	0.633922	-0.826857	0.849237	-1.21341	1.16334	-0.606238	5
OsTN12g000351	1.18917	-0.375119	1.00915	-0.906633	0.311368	-1.22794	8
OsTN12g000361	1.46788	-0.670545	0.371366	-0.911203	0.706214	-0.963715	8
OsTN12g000366	-0.777293	0.0657572	-0.806072	-0.690804	1.74685	0.461559	4
OsTN12g000373	1.34119	-0.658166	0.717958	-0.955829	0.564787	-1.00994	8
OsTN12g000375	-0.689148	0.781487	-1.21337	0.115839	1.48328	-0.478087	4
OsTN12g000377	-1.01622	1.50377	-0.209978	0.783695	-1.02285	-0.0384235	7
OsTN12g000393	1.06143	-0.933419	0.545195	-0.953256	1.07729	-0.797244	8
OsTN12g000403	-0.528404	1.56814	-0.766206	-0.663534	-0.566026	0.956032	7
OsTN12g000407	-0.275235	-0.549782	-0.666949	-0.268727	2.0106	-0.249904	4
OsTN12g000408	-0.0589487	-0.617634	-0.459128	-0.607307	1.9932	-0.250181	4
OsTN12g000409	-0.365336	-0.701706	-0.717045	-0.299933	1.93601	0.148015	4
OsTN12g000415	0.10522	-0.652585	-0.241184	-0.792278	1.93664	-0.355816	4
OsTN12g000418	0.504671	1.2108	0.899385	-1.09019	-0.517816	-1.00685	6
OsTN12g000421	-0.21349	1.5255	-0.72442	0.625051	-1.30508	0.0924376	7
OsTN12g000424	-0.862322	-0.493227	-0.707564	1.54191	-0.44621	0.967412	2
OsTN12g000425	0.977381	-0.853032	0.572124	-0.955856	1.14024	-0.880863	5
OsTN12g000433	-0.843579	1.32525	0.0164406	1.03955	-1.13554	-0.402123	7
OsTN12g000435	-1.51239	0.927273	-0.127209	0.859064	-0.810898	0.66416	3
OsTN12g000451	-0.452491	0.0952642	-1.1213	1.0137	-0.86149	1.32632	2
OsTN12g000452	-0.531342	0.0985262	-1.08798	1.01552	-0.834868	1.34014	2
OsTN12g000469	1.07962	-0.587304	1.09677	-0.856726	0.435216	-1.16757	8
OsTN12g000478	-0.11582	1.05621	0.936051	0.411201	-1.46715	-0.820491	7
OsTN12g000484	0.722125	-1.00294	-0.259829	-1.11758	1.45412	0.204107	5
OsTN12g000498	-0.802352	1.38467	-0.813196	0.843602	-0.969028	0.356304	3
OsTN12g000503	0.00347915	-0.639337	-0.687683	-0.70782	1.89719	0.134175	4
OsTN12g000520	-1.22019	1.49509	-0.700937	0.254216	-0.507867	0.679682	7
OsTN12g000527	-0.2665	1.96029	-0.780392	-0.0448203	-0.655663	-0.212913	7
OsTN12g000530	-0.601177	1.26285	-0.861307	1.15474	-0.983716	0.028607	3
OsTN12g000543	-0.499668	-0.457567	-0.381853	1.98597	-0.671186	0.0243047	1
OsTN12g000573	-0.308595	-0.383644	-0.250355	-0.559977	2.02653	-0.523955	4
OsTN12g000578	-0.571084	-0.341934	1.98662	0.00473396	-0.659246	-0.419095	6
OsTN12g000580	-0.983637	0.271842	-0.96902	0.896552	-0.584655	1.36892	2
OsTN12g000582	1.38852	-0.500598	0.551902	-1.11365	0.619021	-0.945205	8
OsTN12g000585	1.4367	-0.801401	0.46859	-0.274584	0.49497	-1.32427	8
OsTN12g000586	0.96519	-0.326994	0.628307	-0.707028	0.926562	-1.48604	8
OsTN12g000591	-1.01802	1.66625	-0.960838	-0.000565113	-0.171284	0.484456	7
OsTN12g000592	-0.656651	1.45503	-0.555938	0.967585	-1.092	-0.118023	7
OsTN12g000594	-0.505498	0.488367	-1.12103	1.01241	-0.98983	1.11558	3
OsTN12g000595	-0.593729	1.94487	-0.674175	-0.0513587	-0.638471	0.0128623	7
OsTN12g000607	-1.11615	0.40182	-0.588168	1.01868	-0.899443	1.18326	2
OsTN12g000608	-1.08408	0.371431	-0.542284	1.20509	-0.959778	1.00962	3
OsTN12g000609	-0.48928	-0.198657	0.850415	1.50204	-1.25447	-0.410047	1
OsTN12g000610	-0.673753	-0.130508	0.907155	1.48277	-1.14662	-0.439039	1
OsTN12g000627	-0.300639	-0.61897	1.54511	-0.624878	0.934741	-0.935366	5
OsTN12g000633	1.46093	-0.933005	-0.325697	-1.05324	0.882491	-0.0314761	5
OsTN12g000634	1.5367	-0.565098	0.951692	-0.677568	-0.324145	-0.921585	6
OsTN12g000643	-1.22449	0.0802582	-1.23081	0.6169	1.04213	0.71602	2
OsTN12g000656	1.97082	-0.139784	-0.0273387	-0.686455	-0.569917	-0.547324	6
OsTN12g000657	1.96608	-0.113167	-0.0291991	-0.697156	-0.575293	-0.551263	6
OsTN12g000658	1.58276	0.600763	0.131542	-0.505151	-1.23931	-0.570599	6
OsTN12g000659	1.59394	0.585742	0.125652	-0.500292	-1.23502	-0.570017	6
OsTN12g000663	-0.685725	0.73886	-0.564769	1.33631	-1.28959	0.464913	3
OsTN12g000682	0.117891	-0.850077	-0.48869	-0.847286	1.79832	0.269845	4
OsTN12g000685	1.30548	-0.67211	1.20191	-0.925843	-0.201083	-0.708358	6
OsTN12g000688	0.764725	-0.0704178	1.19425	-0.749546	0.372165	-1.51118	8
OsTN12g000690	1.79497	-0.566853	0.514515	-0.720576	-0.236725	-0.785335	6
OsTN12g000692	1.33987	-0.584182	0.884142	-0.913436	0.338076	-1.06447	8
OsTN12g000719	-0.126239	-0.657394	-0.317459	-0.666446	1.98941	-0.221869	4
OsTN12g000722	1.87275	-0.639205	0.280558	-0.83832	-0.145062	-0.530726	6
OsTN12g000740	0.0917163	0.884427	0.152887	1.2068	-1.1397	-1.19612	1
OsTN12g000741	-0.417716	1.79713	-0.93646	0.488854	-0.617194	-0.314613	7
OsTN12g000750	0.498474	-0.316689	-1.26712	1.18539	-0.954323	0.854265	3
OsTN12g000752	-1.15141	0.025118	-1.22826	0.492833	0.623321	1.23839	2
OsTN12g000757	-0.913022	1.78077	-0.862749	0.400547	-0.138624	-0.266924	7
OsTN12g000787	-0.541713	-0.484458	-0.031611	-0.503676	2.00508	-0.443624	4
OsTN12g000791	-1.07237	-0.16029	-0.744534	1.58305	-0.388698	0.782841	2
OsTN12g000809	-0.549181	1.99408	-0.527502	0.00287455	-0.56095	-0.359322	7
OsTN12g000815	-0.640152	-0.562437	-0.82213	1.71158	-0.399955	0.713093	2
OsTN12g000821	-0.843918	0.398579	-0.758461	0.0356721	-0.613881	1.78201	2
OsTN12g000822	-0.868261	0.401166	-0.797611	0.0940412	-0.588323	1.75899	2
OsTN12g000824	-0.513613	0.482195	0.105361	1.64242	-1.2595	-0.45686	1
OsTN12g000825	-0.574359	0.54487	-0.237499	1.61777	-1.30282	-0.0479632	1
OsTN12g000844	-1.18145	1.35951	-1.10222	0.268157	-0.028326	0.684335	2
OsTN12g000847	0.934941	-0.698172	-0.461348	-0.861712	1.56614	-0.47985	5
OsTN12g000850	1.08811	-1.24095	0.397477	-1.06516	0.978984	-0.158458	5
OsTN12g000851	1.62839	-0.445831	0.839994	-0.458525	-0.708963	-0.855061	6
OsTN12g000852	0.170041	-0.755067	-0.622789	-1.03375	1.58563	0.655933	4
OsTN12g000863	1.23127	-0.0537712	1.21101	-0.979458	-0.5278	-0.881256	6
OsTN12g000865	-1.10261	0.611117	-0.764476	1.40185	-0.725063	0.579184	3
OsTN12g000872	-0.178082	-0.975226	0.170858	-0.865214	1.79919	0.0484753	4
OsTN12g000873	1.74244	-0.560641	0.524068	-0.049165	-0.838464	-0.818236	6
OsTN12g000884	-0.528955	-0.659498	-0.0866805	-0.427469	2.00143	-0.298829	4
OsTN12g000885	-0.490071	-0.630866	-0.0545598	-0.505276	2.00036	-0.319584	4
OsTN12g000889	1.41183	-0.868558	0.90489	-0.209404	-0.0615197	-1.17724	6
OsTN12g000899	0.13868	-0.704483	-0.538227	-0.700581	1.92104	-0.116433	4
OsTN12g000901	0.0234183	0.413325	0.880239	0.566827	0.0475727	-1.93138	6
OsTN12g000902	-0.0916879	-0.706682	0.173988	-0.763041	1.90144	-0.514017	4
OsTN12g000933	-1.17954	0.586257	-0.812597	0.336679	-0.44512	1.51433	2
OsTN12g000938	-0.803743	-0.104799	-0.80936	1.25063	-0.770033	1.2373	2
OsTN12g000948	0.065542	0.118228	1.77256	-1.03699	-0.0462624	-0.873082	6
OsTN12g000953	0.493775	-0.515413	-0.767942	-1.07572	1.64115	0.224154	4
OsTN12g000954	0.346525	-0.576726	-0.535088	-1.22311	1.62194	0.366453	4
OsTN12g000956	0.767363	-0.172081	-0.926716	-1.39451	1.07352	0.652424	4
OsTN12g000968	-0.611675	-0.679729	-0.634751	-0.343196	0.403869	1.86548	2
OsTN12g000971	0.199314	-0.679358	-0.679836	-0.655863	1.8973	-0.0815598	4
OsTN12g000975	-0.616363	-0.623274	-0.612357	-0.614068	1.70145	0.76461	4
OsTN12g000986	-1.16707	0.601315	-0.88893	0.761231	-0.566028	1.25949	2
OsTN12g000989	-1.09709	0.290775	-1.03025	1.1662	-0.39479	1.06516	2
OsTN12g000991	-1.08043	0.996327	-1.01259	1.01391	-0.584401	0.667181	3
OsTN12g000992	-1.18748	-0.328252	-0.722038	1.19062	-0.181757	1.2289	2
OsTN12g001005	-0.53344	2.00918	-0.50164	-0.0765324	-0.544503	-0.353064	7
OsTN12g001010	-0.262645	1.99295	-0.394354	-0.102911	-0.488331	-0.74471	7
OsTN12g001020	-0.94446	0.970499	-0.92739	1.04949	-0.846622	0.698487	3
OsTN12g001021	-0.94145	0.973963	-0.925112	1.04457	-0.852698	0.700731	3
OsTN12g001037	-0.657611	-0.09939	-0.759884	1.67393	-0.842028	0.684988	3
OsTN12g001052	1.85314	-0.300585	0.376813	-0.608296	-0.447349	-0.873723	6
OsTN12g001059	1.08597	-0.0379611	0.0948406	-1.06684	1.11725	-1.19325	8
OsTN12g001080	-0.838199	1.36321	-0.734004	1.07289	-0.865576	0.00167951	3
OsTN12g001114	1.55337	-0.774391	0.651601	-0.810031	0.287264	-0.90781	8
OsTN12g001128	-0.946764	0.598506	-1.23914	1.0918	-0.421195	0.916799	2
OsTN12g001129	-1.18791	0.375709	-1.11391	1.03125	-0.162103	1.05697	2
OsTN12g001139	-0.291328	1.61285	0.526574	0.145964	-0.88054	-1.11352	7
OsTN12g001140	0.966156	-0.162481	0.476392	0.87455	-1.68029	-0.474329	1
OsTN12g001145	-1.73529	0.651854	-0.0629961	0.417903	1.11255	-0.384028	4
OsTN12g001149	0.170129	-0.563711	-0.0490304	-0.939046	1.87712	-0.495464	4
OsTN12g001159	-0.847388	-0.0578605	-0.884185	1.01742	-0.654104	1.42611	2
OsTN12g001189	-0.353829	-0.832461	-0.433437	-0.725198	1.77192	0.573006	4
OsTN12g001195	-0.514196	-0.12692	-1.03425	1.53443	-0.731225	0.872164	2
OsTN12g001197	1.62713	-0.976724	0.425591	-0.86866	0.366055	-0.573388	8
OsTN12g001206	1.64229	-0.667482	0.634853	-0.997081	0.0628506	-0.675428	8
OsTN12g001229	1.19506	-0.720122	0.865172	-1.05641	0.615935	-0.899635	8
OsTN12g001232	0.994907	-0.775648	1.08934	-0.962913	0.612946	-0.95863	8
OsTN12g001247	-0.387373	-0.54827	-0.113807	-0.372817	2.01228	-0.590015	4
OsTN12g001254	-1.18539	0.0112448	-0.115321	-0.609184	0.11031	1.78834	2
OsTN12g001264	-0.860453	1.00299	-0.916786	0.628381	-0.928973	1.07484	3
OsTN12g001265	-0.854246	0.246641	-0.988401	1.06136	-0.723407	1.25805	2
OsTN12g001270	1.22354	-0.59287	0.868332	-1.04153	0.548446	-1.00592	8
OsTN12g001275	-0.944478	1.42469	-0.486096	0.87244	-1.02713	0.160568	7
OsTN12g001281	0.721895	-1.19235	1.05359	-0.929013	0.888559	-0.542678	8
OsTN12g001282	1.53231	-0.891084	0.142032	-0.419765	0.711445	-1.07493	8
OsTN12g001289	-0.76458	1.45228	-1.06445	0.909772	-0.585481	0.0524575	7
OsTN12g001291	1.58753	-1.28157	0.629867	-0.386219	-0.0098406	-0.539766	6
OsTN12g001300	1.26582	-0.219449	0.940522	0.212934	-1.10019	-1.09964	6
OsTN12g001304	0.335957	-1.03461	-0.494524	-0.894359	0.49907	1.58846	4
OsTN12g001339	1.31185	-0.903776	1.19584	-0.803286	-0.218033	-0.58259	6
OsTN12g001345	-0.379356	-0.411872	-1.46224	0.83194	0.0604632	1.36107	2
OsTN12g001386	-0.439272	0.586774	-0.730073	1.63509	-1.11885	0.0663353	1
OsTN12g001396	0.0181594	-0.522466	-0.400028	-0.643468	1.98938	-0.441578	4
OsTN12g001410	0.473834	-0.356451	1.80064	-0.933334	-0.333946	-0.650748	6
OsTN12g001421	0.107947	-1.02485	0.144024	-0.760514	1.80671	-0.273319	4
OsTN12g001429	0.191357	-0.932696	0.277432	-0.850952	1.75923	-0.444374	5
OsTN12g001435	-0.626879	0.659412	-1.01233	1.10654	-1.04187	0.915132	3
OsTN12g001436	0.201207	-1.635	0.399313	0.964313	-0.737733	0.807898	1
OsTN12g001453	-0.805493	1.65002	-0.881471	0.511575	-0.725817	0.251181	7
OsTN12g001456	0.0896982	-0.732402	0.316924	-0.832394	1.8021	-0.643928	5
OsTN12g001461	0.406925	-0.651915	0.313354	-1.30888	1.57646	-0.335944	5
OsTN12g001467	-0.711673	0.894806	-0.933537	0.36991	-0.952585	1.33308	2
OsTN12g001512	-0.903226	0.0583597	-1.05252	1.20093	-0.484901	1.18136	2
OsTN12g001530	1.14115	-0.880605	-0.113684	-1.23449	1.17388	-0.0862496	5
OsTN12g001532	-0.787872	0.574217	-0.93244	1.2411	-0.951726	0.856717	3
OsTN12g001533	-0.779173	0.55784	-0.99345	1.24617	-0.893569	0.862184	3
OsTN12g001538	1.5071	-0.269972	0.694635	-0.914459	0.131496	-1.1488	8
OsTN12g001551	-0.575533	1.02934	0.634391	0.952554	-1.34982	-0.690931	1
OsTN12g001556	-1.07526	0.521629	-1.09466	1.07042	-0.439304	1.01718	2
OsTN12g001562	-0.745749	0.0871779	-0.94667	1.31413	-0.795392	1.0865	2
OsTN12g001565	0.159137	-0.671203	1.42025	-0.0860265	0.628555	-1.45071	8
OsTN12g001576	-1.29056	1.01773	-1.1514	0.234924	0.270211	0.919103	2
OsTN12g001582	1.74098	-0.695614	0.251972	-1.03893	0.263775	-0.522176	8
OsTN12g001585	-0.535811	1.49264	0.347574	-1.13088	-0.818262	0.644734	7
OsTN12g001586	0.418471	-1.08011	0.975763	-1.07729	1.17353	-0.410366	5
OsTN12g001593	1.30127	-1.75395	0.0266273	0.00116479	-0.0515371	0.476433	8
OsTN12g001596	1.72466	-0.908507	0.579244	-0.835967	-0.211488	-0.347944	6
OsTN12g001597	1.66005	-0.905273	0.694486	-0.860589	-0.174883	-0.413787	6
OsTN12g001603	-0.851514	0.711753	-0.943373	1.33336	-0.856283	0.606052	3
OsTN12g001613	1.53099	-0.513016	0.627369	-0.453806	0.140252	-1.33179	6
OsTN12g001614	1.65352	-0.309135	0.783126	-0.601539	-0.638763	-0.887211	6
OsTN12g001615	1.62907	-0.307619	0.818574	-0.666489	-0.576162	-0.897371	6
OsTN12g001617	1.25655	-0.657489	0.781869	-1.52546	0.21369	-0.0691544	8
OsTN12g001636	-0.717559	0.812731	-0.921649	1.26862	-1.01731	0.575164	3
OsTN12g001640	1.12143	-0.545725	0.988629	-1.06979	0.527472	-1.02201	8
OsTN12g001649	-0.0780781	-0.553526	-0.440298	-0.556544	2.00963	-0.381183	4
OsTN12g001650	-0.0469315	-0.559142	-0.460592	-0.561306	2.00411	-0.37614	4
OsTN12g001687	0.632848	-1.15312	-0.518084	-0.831881	1.4645	0.405734	4
OsTN12g001689	-1.12831	-1.05884	0.869143	1.05669	-0.4608	0.722112	1
OsTN12g001698	0.991798	-0.550044	1.08282	-0.336258	0.333788	-1.52211	8
OsTN12g001699	0.464569	-1.41079	0.599779	-0.645391	1.36934	-0.377504	5
OsTN12g001701	-0.248872	-0.702827	-0.673622	-0.779832	1.69745	0.7077	4
OsTN12g001718	-1.02232	0.661147	-1.05113	1.19983	-0.583223	0.795698	3
OsTN12g001724	-0.408612	0.720344	-1.14956	1.06956	-1.07029	0.838553	3
OsTN12g001725	-0.694728	0.641275	-0.863999	0.996266	-1.1266	1.04779	3
OsTN12g001735	0.259652	-0.581131	-0.227264	-0.739794	1.90239	-0.613857	4
OsTN12g001736	-0.715606	1.01052	-0.806642	1.12547	-1.13182	0.518076	3
OsTN12g001737	-0.726971	1.03056	-0.798416	1.10568	-1.13092	0.52007	3
OsTN12g001759	-0.775307	-0.122193	-0.386105	1.93559	-0.697357	0.045367	1
OsTN12g001773	-0.38615	-0.613743	-0.0313448	-0.616289	1.99343	-0.345904	4
OsTN12g001774	-0.705037	1.21396	-0.830839	1.27378	-0.838826	-0.113042	3
OsTN12g001776	-0.552131	0.396945	-0.715134	1.86659	-0.649368	-0.3469	1
OsTN12g001777	-0.478545	0.24376	-0.642494	1.93142	-0.607072	-0.447067	1
OsTN12g001778	-0.407162	0.0307385	-0.293015	-0.635412	1.97385	-0.669005	4
OsTN12g001781	-0.757076	0.601831	-0.636961	1.7195	-0.832628	-0.094668	1
OsTN12g001782	-0.748809	0.604087	-0.641064	1.72197	-0.828658	-0.107523	1
OsTN12g001783	-0.27713	-0.654759	-0.471373	1.99728	-0.528031	-0.0659867	1
OsTN12g001784	-0.709347	0.247168	-0.494476	1.8898	-0.770318	-0.162823	1
OsTN12g001789	-0.676189	0.979926	-1.58916	-0.112818	0.516315	0.881922	2
OsTN12g001790	-0.0284013	-0.816444	-0.726837	-0.847662	1.49178	0.927561	4
OsTN12g001801	-0.548476	-0.56436	0.683636	1.74545	-0.643012	-0.673239	1
OsTN12g001803	1.01616	1.12819	-0.114855	0.257222	-1.12405	-1.16266	7
OsTN12g001838	1.84951	-0.690597	0.355085	-0.726695	-0.130706	-0.6566	6
OsTN12g001848	0.553714	0.142764	1.44532	0.0973232	-0.935462	-1.30366	6
OsTN12g001856	-0.675329	0.0216892	-0.285121	1.91915	-0.876491	-0.103897	1
OsTN12g001860	1.56645	-0.714818	0.788514	-0.856804	0.0399567	-0.823296	6
OsTN12g001862	-0.365654	0.329605	0.116297	1.69294	-1.27773	-0.495466	1
OsTN12g001864	-0.50122	0.733747	0.699835	1.20056	-1.11441	-1.01851	1
OsTN12g001867	-0.321578	2.03826	-0.451126	-0.379814	-0.47497	-0.410769	7
OsTN12g001868	-0.449363	0.576776	-0.897533	1.42437	-1.16885	0.514601	3
OsTN12g001870	0.154863	-0.663311	-0.587985	-0.685045	1.92374	-0.142265	4
OsTN12g001871	-0.0856092	-0.467301	-0.393062	-0.566279	2.01225	-0.499994	4
OsTN12g001874	0.773432	-0.942624	-0.411	-1.15878	1.36424	0.374733	5
OsTN12g001875	0.694942	-0.963675	-0.407706	-1.16138	1.35741	0.480408	5
OsTN12g001887	-0.696338	0.409182	-1.15416	-0.591728	1.56371	0.469337	4
OsTN12g001889	-0.864308	0.666608	-1.10971	1.1295	-0.712775	0.890684	3
OsTN12g001892	-1.12079	0.502414	-0.98979	1.04808	-0.512547	1.07263	2
OsTN12g001895	0.749764	-1.081	-0.099647	-0.68791	1.5987	-0.479899	5
OsTN12g001896	1.01251	-0.530286	1.45519	-0.88946	-0.180609	-0.867345	6
OsTN12g001897	0.924779	-0.876254	0.859831	-1.02805	0.946865	-0.827173	8
OsTN12g001914	-0.493644	0.330514	-0.814681	0.958658	-1.2282	1.24735	2
OsTN12g001919	-0.185845	-0.650602	-0.419589	-0.581114	2.00044	-0.163292	4
OsTN12g001922	1.95305	-0.284429	0.0250561	-0.761086	-0.678368	-0.254225	6
OsTN12g001949	-0.456421	-0.230636	-0.708574	0.551794	-0.915224	1.75906	2
OsTN12g001950	-0.603826	-0.288814	-0.692807	0.432515	-0.692451	1.84538	2
OsTN12g001951	1.32566	-1.10808	0.97979	-0.976546	0.0855251	-0.306349	8
OsTN12g001956	-1.21544	0.493771	-1.08478	0.641746	-0.128991	1.2937	2
OsTN12g001973	-0.389245	-0.452853	-0.304399	-0.459309	2.03791	-0.432103	4
OsTN12g001996	0.927068	-1.28732	0.838566	-0.804562	0.897839	-0.571586	8
OsTN12g002004	0.921068	-0.978859	0.837988	-1.05527	0.956016	-0.680948	8
OsTN12g002028	0.445766	-0.772751	0.258684	-1.05415	1.65577	-0.533322	5
OsTN12g002029	0.999692	-0.91452	1.03382	-0.936323	0.683937	-0.866608	8
OsTN12g002034	0.284491	-0.780464	1.77712	-0.917907	0.167139	-0.530378	8
OsTN12g002035	0.209063	-0.567284	1.69912	-1.32098	-0.043707	0.0237914	6
OsTN12g002036	1.00095	-0.783209	0.599121	-0.744291	1.07482	-1.1474	8
OsTN12g002038	-0.299892	-0.686623	-0.158293	-0.880745	1.9034	0.122155	4
OsTN12g002043	-0.436925	0.517428	-0.885216	1.28423	-1.23814	0.758629	3
OsTN12g002044	-0.00367419	-0.75053	0.0468826	-0.774491	1.91069	-0.428873	4
OsTN12g002057	-0.683112	0.320673	-0.223689	1.15481	-1.48542	0.916746	3
OsTN12g002070	-0.651363	-0.455304	-0.350651	1.89822	-0.742484	0.301585	1
OsTN12g002071	1.08209	-0.883057	0.162289	-0.824637	1.28892	-0.825603	5
OsTN12g002072	-0.331456	0.294773	-0.859025	1.04714	-1.29173	1.14029	3
OsTN12g002073	-0.94792	0.591814	-0.811818	1.00661	-0.93568	1.09699	3
OsTN12g002074	1.05582	-0.174238	1.42298	-0.751611	-0.604338	-0.948614	6
OsTN12g002075	1.28863	-0.104611	1.17917	-0.803616	-0.584699	-0.974873	6
OsTN12g002080	-0.739426	-0.117562	0.048258	1.17764	-1.40556	1.03666	3
OsTN12g002081	-0.904781	0.35921	-0.957892	1.15995	-0.758377	1.10189	2
OsTN12g002082	-0.280387	-0.647821	-0.47088	-0.715932	1.93237	0.182646	4
OsTN12g002091	0.334071	-0.811192	-0.231817	-0.559965	1.87098	-0.602077	4
OsTN12g002092	0.944483	-0.382226	0.654205	-0.811359	0.979293	-1.3844	8
OsTN12g002094	-0.37085	-0.531125	-0.220813	-0.521539	2.02792	-0.383596	4
OsTN12g002097	0.26999	0.430963	-1.3372	0.82423	-1.15612	0.96814	3
OsTN12g002112	1.08218	-0.754546	0.827163	-1.1429	0.790623	-0.802517	8
OsTN12g002120	-0.199932	0.695655	-0.937447	1.06242	-1.3771	0.756409	3
OsTN12g002121	-0.328414	-0.282735	-0.261213	-0.616801	2.02026	-0.5311	4
OsTN12g002128	0.36964	-0.537591	-0.331223	-0.761076	-0.613118	1.87337	2
OsTN12g002140	1.0125	-0.935394	1.27205	-0.377906	0.172892	-1.14414	8
OsTN12g002141	0.451018	-0.840744	0.200656	-0.947414	1.68763	-0.551149	5
OsTN12g002162	0.670948	-1.52943	0.998432	-0.640772	0.832565	-0.331744	5
OsTN12g002165	-0.419121	-0.592331	0.167093	-0.749245	1.94013	-0.346528	4
OsTN12g002172	1.11105	-0.127909	1.34171	-0.984544	-0.468327	-0.871983	6
OsTN12g002174	0.415222	-0.316739	1.53532	-0.339239	0.194445	-1.48901	6
OsTN12g002180	0.490699	-0.832733	0.146997	-0.868794	1.69885	-0.635023	5
OsTN12g002185	-0.402129	-0.732563	-0.20764	-0.650593	1.95807	0.0348529	4
OsTN12g002197	-0.771188	1.2413	-0.433391	1.22679	-1.06384	-0.199665	1
OsTN12g002199	-0.991256	0.334105	-0.965666	0.814409	-0.5916	1.40001	2
OsTN12g002200	-1.11385	0.848948	-0.979018	0.792362	-0.595909	1.04747	2
OsTN12g002202	-1.03731	0.545544	-0.851633	0.432095	-0.616528	1.52783	2
OsTN12g002204	0.345113	0.862753	-0.578928	1.06841	-1.62951	-0.0678448	1
OsTN12g002205	1.67741	-0.802943	0.745559	-0.316041	-0.785485	-0.518503	6
OsTN12g002209	0.942013	-0.879165	0.888315	-0.964104	0.906747	-0.893806	8
OsTN12g002215	-0.709499	0.874398	-0.844918	1.13445	-1.12941	0.674984	3
OsTN12g002220	0.685824	0.711577	0.101502	0.250908	-1.97471	0.224896	7
OsTN12g002228	-0.587953	1.60808	-0.737684	0.799121	-0.928547	-0.153017	7
OsTN12g002229	-0.348658	-0.323684	-0.630987	-0.595109	-0.104189	2.00263	2
OsTN12g002231	-1.10005	1.42252	-0.717311	0.66428	-0.756904	0.487463	3
OsTN12g002233	-0.337457	-0.479002	-0.277961	-0.543175	2.03196	-0.394363	4
OsTN12g002234	-0.322023	-0.390488	-0.965307	-0.678414	1.7147	0.641533	4
OsTN2g000001	-0.804188	0.813104	-1.13216	1.32015	-0.667735	0.47083	3
OsTN2g000013	-0.0383438	-0.348926	-0.475768	-0.647763	1.99829	-0.487493	4
OsTN2g000014	-0.435468	-0.473116	-0.158087	-0.481484	2.02534	-0.477185	4
OsTN2g000015	0.780379	-0.246769	0.6176	-1.08475	1.14359	-1.21004	8
OsTN2g000022	1.61657	0.2391	-0.399093	0.368024	-1.34254	-0.482063	6
OsTN2g000024	-0.468717	-0.486344	-0.696238	-0.772203	0.698892	1.72461	2
OsTN2g000034	1.95031	-0.366738	-0.284808	-0.863732	0.0470696	-0.482103	8
OsTN2g000035	1.36463	-0.671778	0.901352	-1.07251	0.28123	-0.802926	8
OsTN2g000036	-0.394527	0.617814	-1.056	0.915543	-1.16076	1.07793	3
[truncated: 4,406 more rows]
