# Supplementary material for: Insect-derived long non-coding RNAs function as epigenetic effectors to reprogram plant immunity
Source: Research Square preprint supplement (doi:10.21203/rs.3.rs-8297537/v1), 2025-12-12
Supplement: Supplementary file 7 [file e7441b42940bc609d054b365.xlsx]

## Sheet: Sheet1 (2)
Supplementary data 6. List of potential BSCL1-interacting proteins in rice screened out vie yeast three-hybrid assays
Colony ID	Gene_id	Describe
1	OsTN4g001772	histone H3.3-like
2	OsTN2t000810	C2 and GRAM domain-containing protein At1g03370
3	OsTN4g001772	histone H3.3-like
4	OsTN3g002887	vacuolar protein sorting-associated protein 2 homolog 2
5	OsTN3g002210	histone H3.3 isoform X1
6	OsTN2g002166	ribonuclease J isoform X1
7	OsTN10g000788	profilin A like
8	OsTN11g000358	DDT domain-containing protein PTM-like
10	OsTN2g002166	ribonuclease J isoform X1
11	OsTN2g000610	Core-2/I-branching beta-16-N-acetylglucosaminyltransferase family protein
13	OsTN3g002887	vacuolar protein sorting-associated protein 2 homolog 2
14	OsTN3g002887	vacuolar protein sorting-associated protein 2 homolog 2
18	OsTN4g002071	transcription factor RF2a-like
20	XM_043143845.1	Ustilaginoidea virens uncharacterized protein (UV8b_06348)
26	OsTN11g000358	DDT domain-containing protein PTM-like
29	OsTN5g002404	hexokinase-5
30	OsTN6g002026	T-complex protein 1 subunit gamma
33	OsTN3g002887	vacuolar protein sorting-associated protein 2 homolog 2
34	OsTN6g000453	U-box domain-containing protein 70
36	OsTN2g002166	ribonuclease J isoform X1
38	OsTN3g002210	histone H3.3 isoform X1
39	OsTN11g001484	F-box domain containing protein
40	OsTN1g002988	MAPK activating protein-like
41	OsTN2g002166	ribonuclease J isoform X1
46	OsTN4g002071	transcription factor RF2a-like
48	LOC4335561	FAR1-RELATED SEQUENCE 5
49	OsTN4g001772	histone H3.3-like
50	OsTN3g002887	vacuolar protein sorting-associated protein 2 homolog 2
53	OsTN6g000453	U-box domain-containing protein 70
56	OsTN3g002887	vacuolar protein sorting-associated protein 2 homolog 2
58	OsTN4g001772	histone H3.3-like
61	LOC4333538	vacuolar protein sorting-associated protein 2 homolog 2
62	OsTN7g002207	arabinosyltransferase RRA3
63	OsTN3g000137	riboflavin biosynthesis protein PYRD, chloroplastic
65	OsTN3g002887	vacuolar protein sorting-associated protein 2 homolog 2
68	OsTN4g002071	transcription factor RF2a-like
69	OsTN3g002887	vacuolar protein sorting-associated protein 2 homolog 2
71	OsTN3g002887	vacuolar protein sorting-associated protein 2 homolog 2
73	OsTN4g002071	transcription factor RF2a-like
74	OsTN3g002210	histone H3.3 isoform X1
76	OsTN11g001883	HIRA-interacting protein 3
77	OsTN4g002071	transcription factor RF2a-like
78	OsTN3g002887	vacuolar protein sorting-associated protein 2 homolog 2
83	OsTN4g002071	transcription factor RF2a-like
84	XM_043143845.1	Ustilaginoidea virens uncharacterized protein (UV8b_06348)
85	OsTN4g002071	transcription factor RF2a-like
87	OsTN6g002026	T-complex protein 1 subunit gamma
90	OsTN6g000798	kinesin-like protein KCA2
91	OsTN5g000961	ER membrane protein complex subunit 1
92	OsTN11g001883	HIRA-interacting protein 3
93	OsTN8g000198	probable sugar phosphate/phosphate translocator At3g14410
97	OsTN6g000701	hydroxyproline-rich glycoprotein-like
100	OsTN3g002210	histone H3.3 isoform X1
101	OsTN1g002697	plastidial pyruvate kinase 2
102	OsTN3g002887	vacuolar protein sorting-associated protein 2 homolog 2
103	OsTN6g002026	T-complex protein 1 subunit gamma
106	OsTN4g001772	histone H3.3-like
110	OsTN4g002071	transcription factor RF2a-like
112	OsTN4g001772	histone H3.3-like
114	OsTN3g002887	vacuolar protein sorting-associated protein 2 homolog 2
117	OsTN2g002166	ribonuclease J isoform X1
118	OsTN2g002166	ribonuclease J isoform X1
119	OsTN3g002887	vacuolar protein sorting-associated protein 2 homolog 2
126	OsTN3g002887	vacuolar protein sorting-associated protein 2 homolog 2
127	OsTN3g002210	histone H3.3 isoform X1
128	OsTN4g002071	transcription factor RF2a-like
129	OsTN4g002071	transcription factor RF2a-like
133	XM_043143845.1	Ustilaginoidea virens uncharacterized protein (UV8b_06348)
138	OsTN6g000001	PHD zinc finger protein-like
139	XM_043142523.1	Ustilaginoidea virens uncharacterized protein (UV8b_05025)
140	OsTN3g002887	vacuolar protein sorting-associated protein 2 homolog 2
143	OsTN3g002210	histone H3.3 isoform X1
145	OsTN4g001772	histone H3.3-like
146	OsTN5g000380	chromatin complex subunit A
147	OsTN6g000453	U-box domain-containing protein 70
149	OsTN4g002071	transcription factor RF2a-like
151	OsTN3g002887	vacuolar protein sorting-associated protein 2 homolog 2
153	OsTN3g002887	vacuolar protein sorting-associated protein 2 homolog 2
154	OsTN2g002166	ribonuclease J isoform X1
155	OsTN3g002210	histone H3.3 isoform X1
158	OsTN3g002210	histone H3.3 isoform X1
159	OsTN3g002210	histone H3.3 isoform X1
160	OsTN6g000453	U-box domain-containing protein 70
161	OsTN3g002887	vacuolar protein sorting-associated protein 2 homolog 2
162	OsTN6g000453	U-box domain-containing protein 70
163	OsTN3g002887	vacuolar protein sorting-associated protein 2 homolog 2
164	XM_043139629.1	Ustilaginoidea virens uncharacterized protein (UV8b_02131)
165	OsTN4g002071	transcription factor RF2a-like
166	OsTN11g001883	HIRA-interacting protein 3
170	OsTN3g003185	ATP synthase CF1 alpha subunit (chloroplast)
172	OsTN3g002887	vacuolar protein sorting-associated protein 2 homolog 2
173	OsTN1g003882	replication protein A 70 kDa DNA-binding subunit B-like isoform X3
174	OsTN3g002210	histone H3.3 isoform X1
179	OsTN4g002071	transcription factor RF2a-like
181	OsTN1g000641	glutamine--tRNA ligase
183	OsTN4g002071	transcription factor RF2a-like
184	OsTN11g001122	Core-2/I-branching beta-16-N-acetylglucosaminyltransferase family protein
185	OsTN3g002887	vacuolar protein sorting-associated protein 2 homolog 2
187	OsTN11g001883	HIRA-interacting protein 3
188	OsTN11g001883	HIRA-interacting protein 3
189	OsTN3g002887	vacuolar protein sorting-associated protein 2 homolog 2
190	OsTN3g002210	histone H3.3 isoform X1
195	OsTN6g000453	U-box domain-containing protein 70
197	OsTN11g001122	Core-2/I-branching beta-16-N-acetylglucosaminyltransferase family protein
